# Supplementary material for: Spatial deconvolution of HER2-positive breast cancer delineates tumor-associated cell type interactions
Source: PubMed Central journal article supplement (PMC8516894; doi:10.1038/s41467-021-26271-2), 2021-10-14

# major\_A3

B-cells

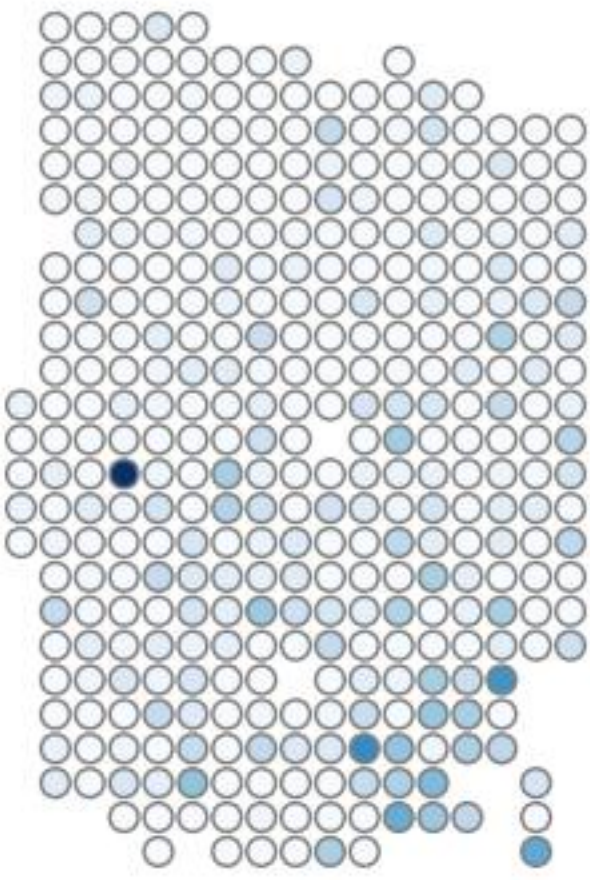

CAFs

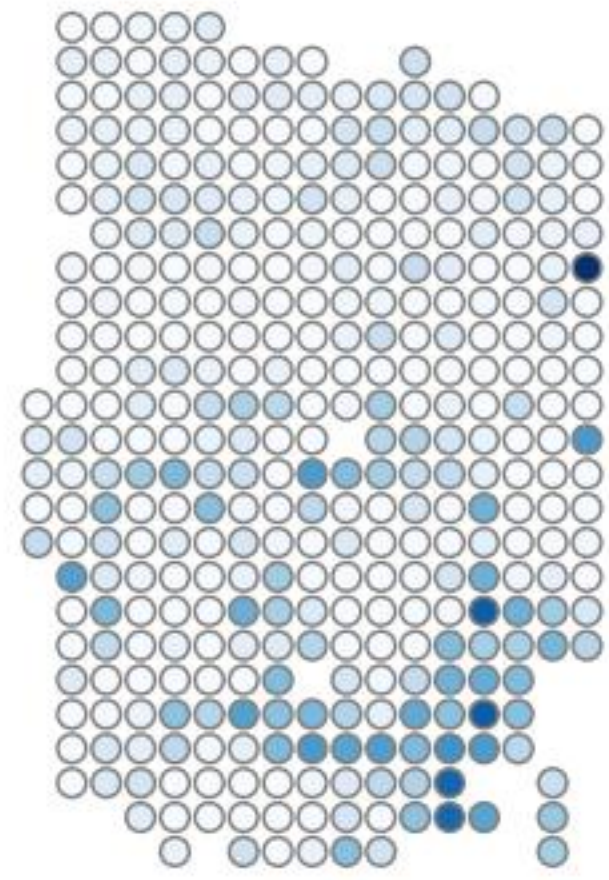

Endothelial

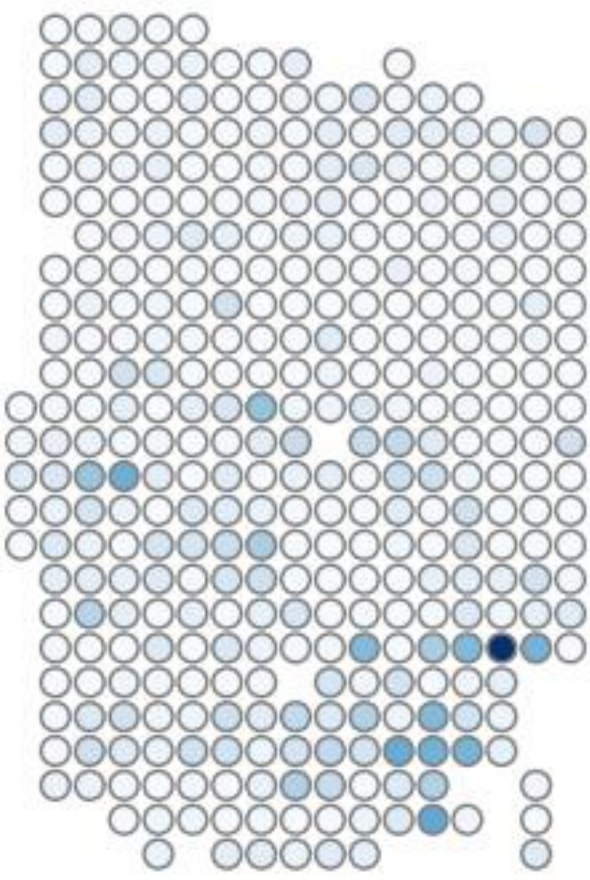

Epithelial

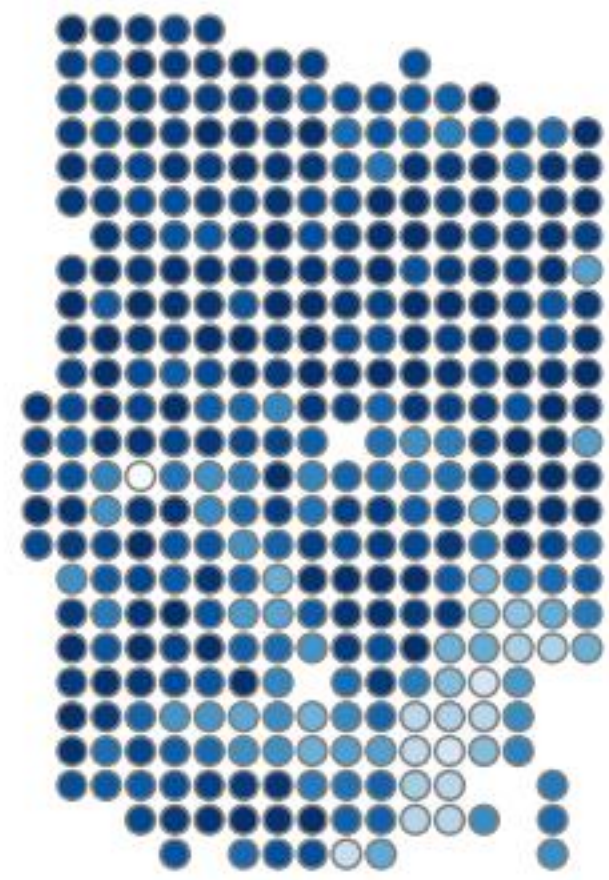

Myeloid

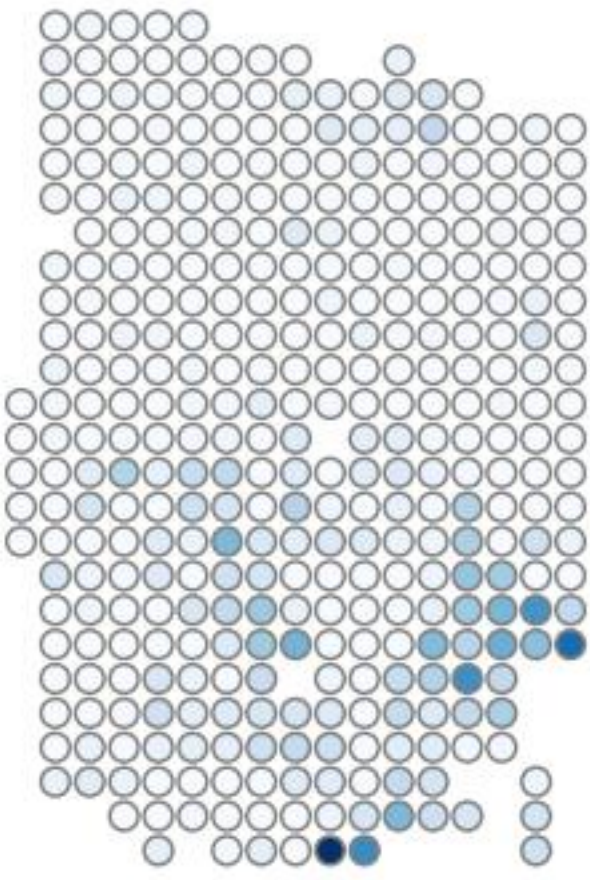

Plasma Cells

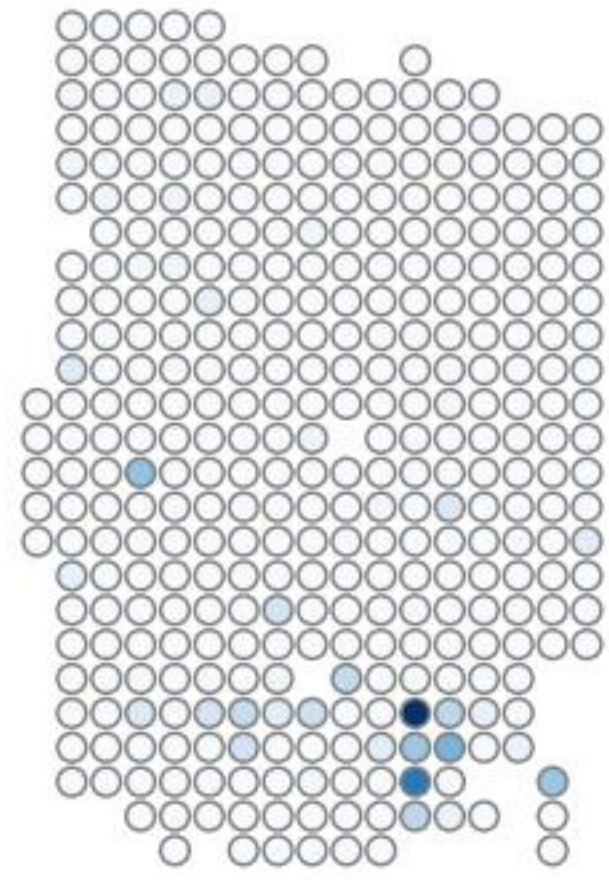

PVL

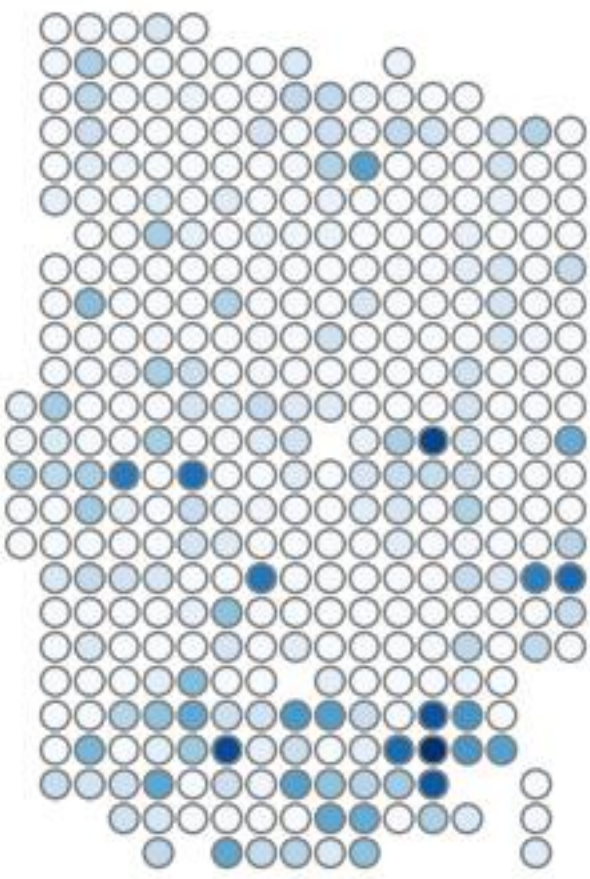

T-cells

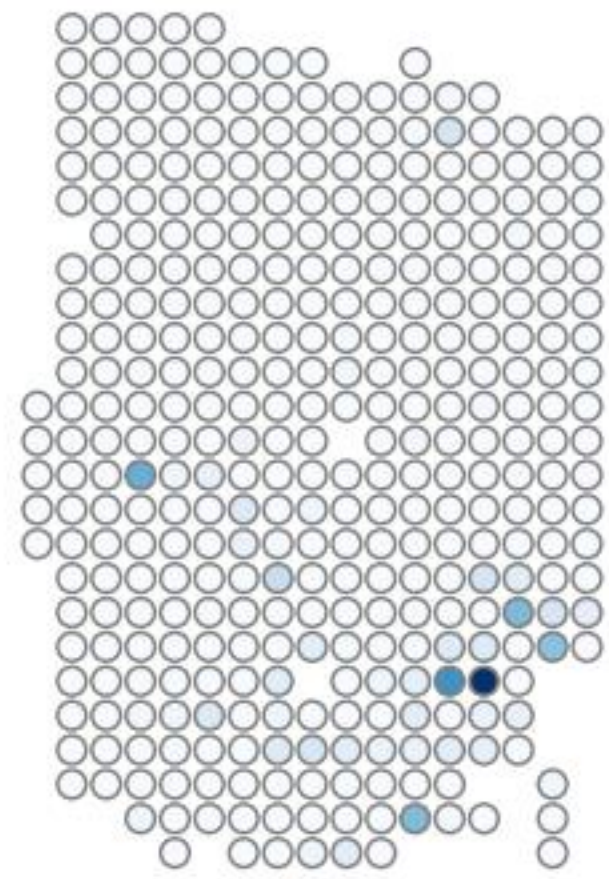

# major\_A6

B-cells

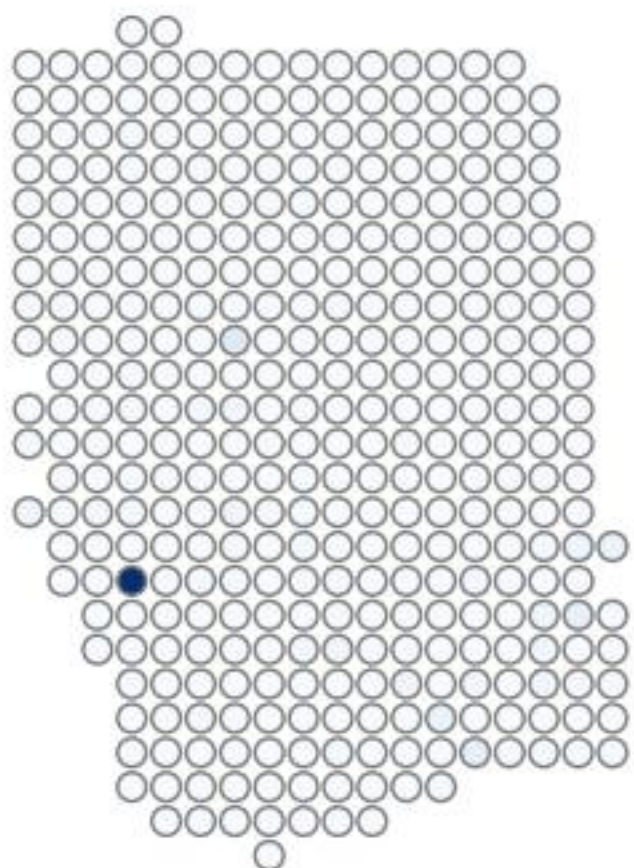

CAFs

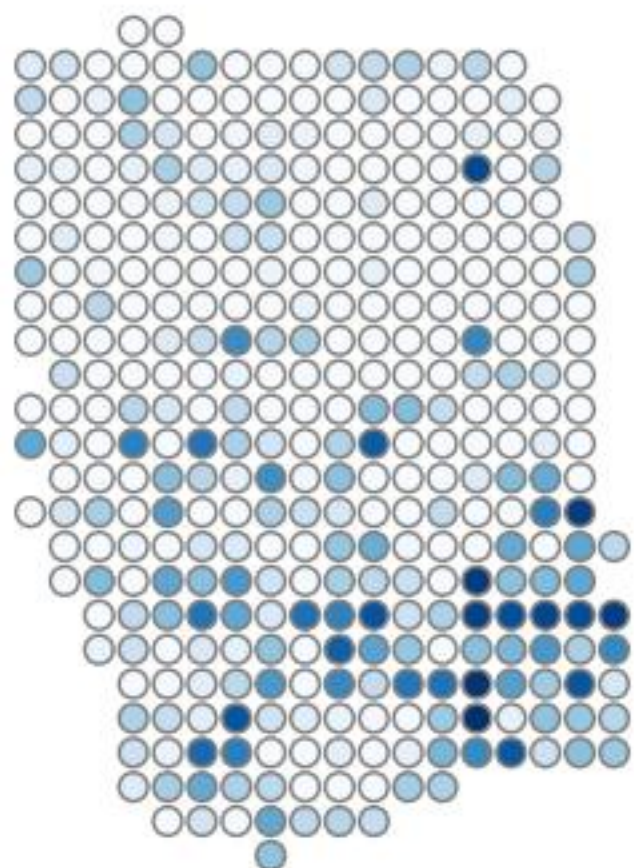

Endothelial

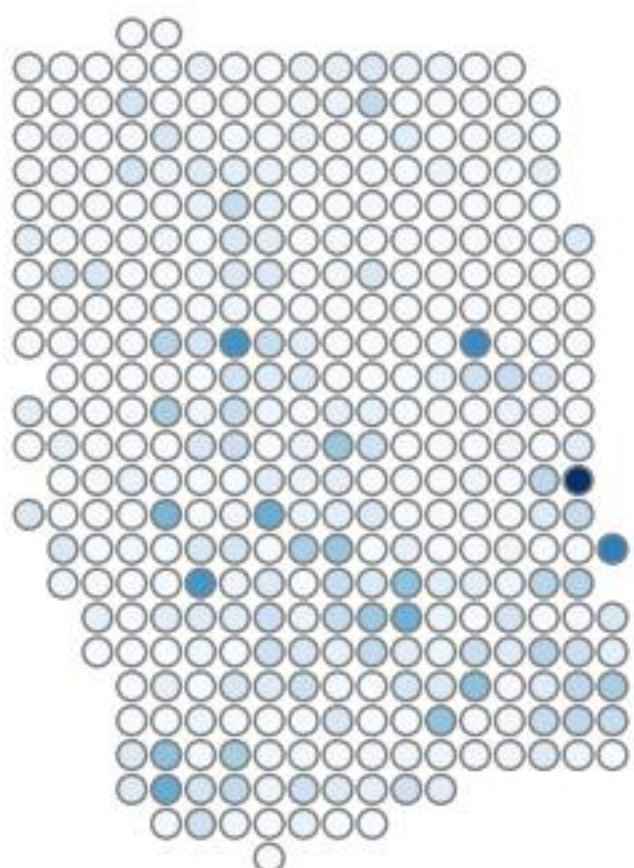

Epithelial

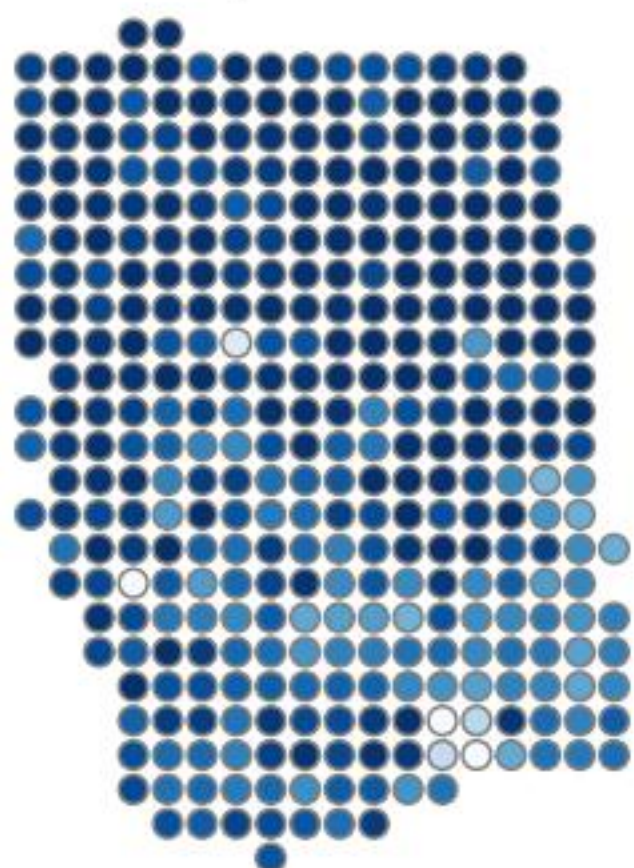

Myeloid

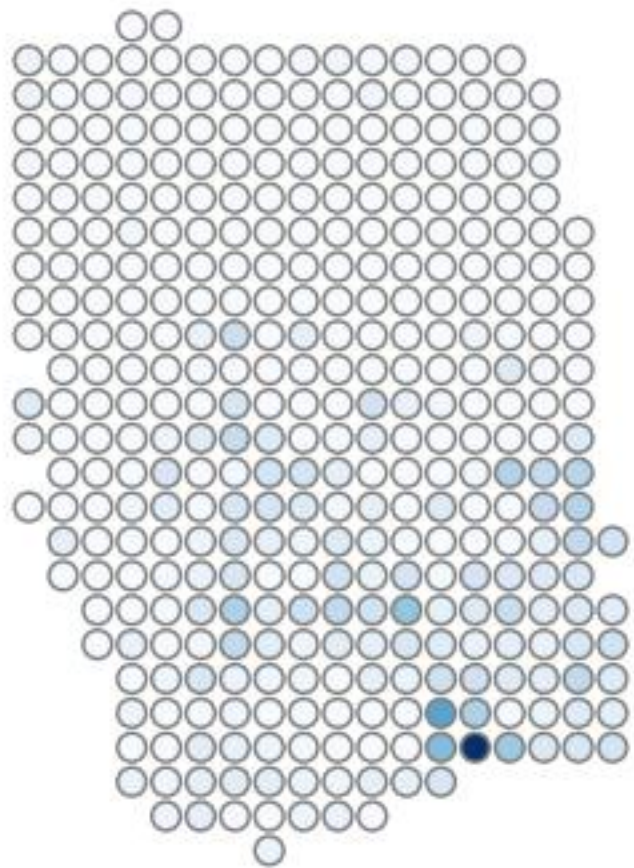

Plasma Cells

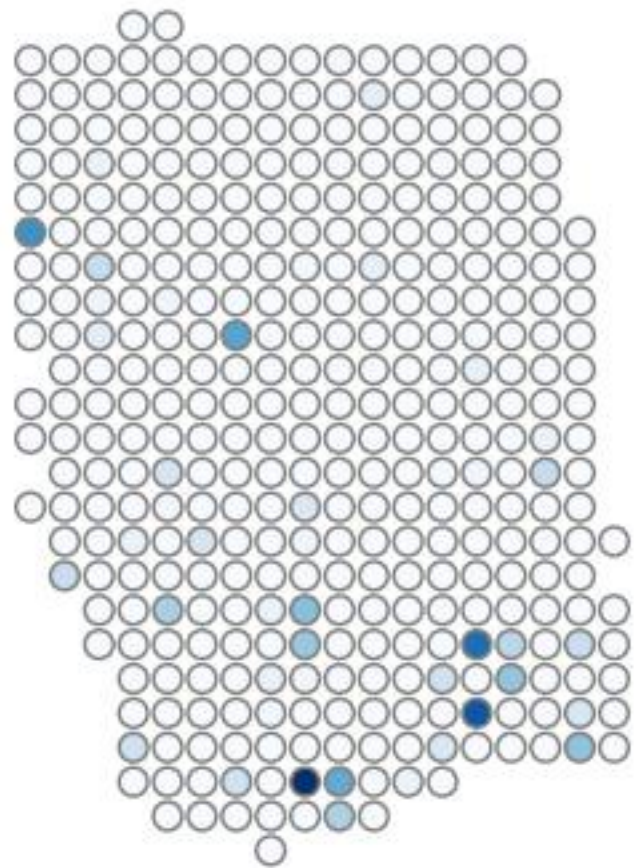

PVL

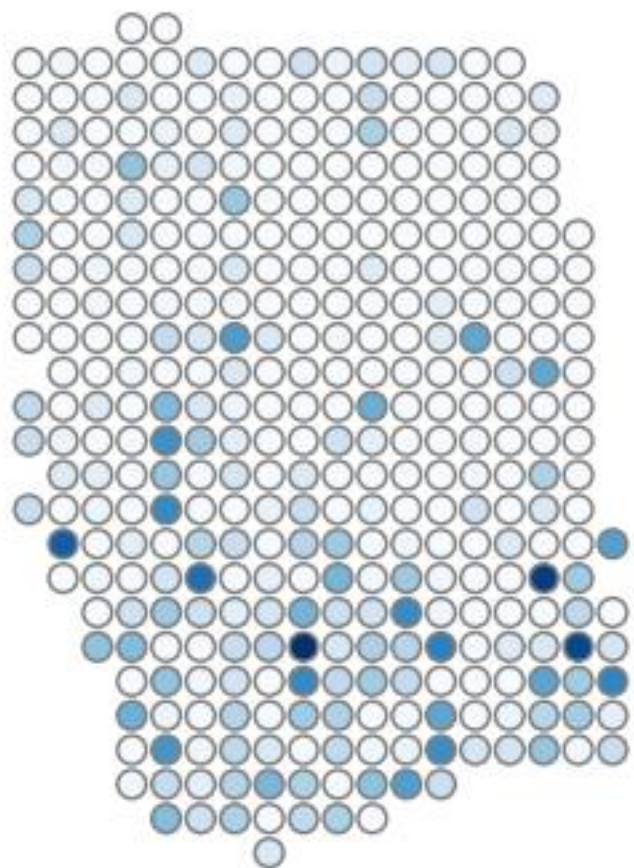

T-cells

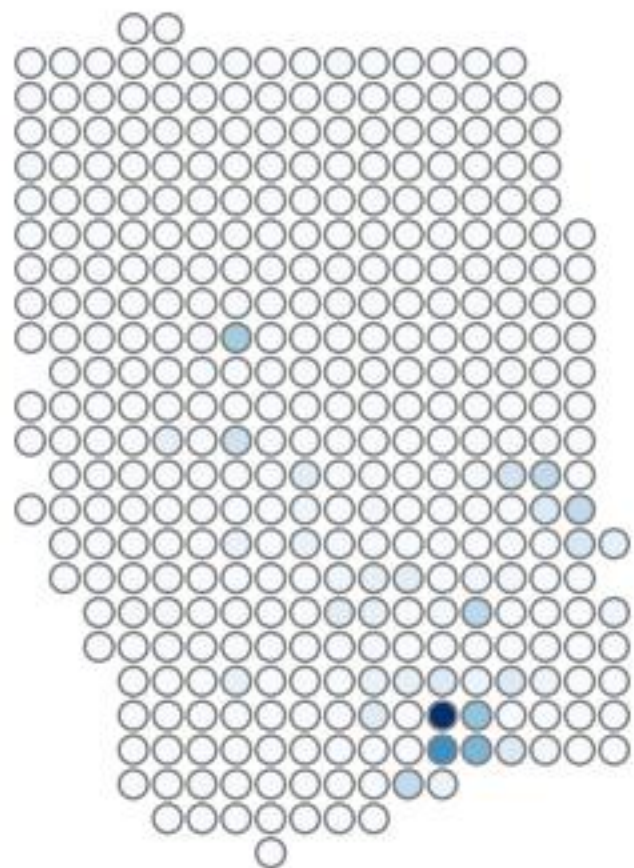

# major\_G3

B-cells

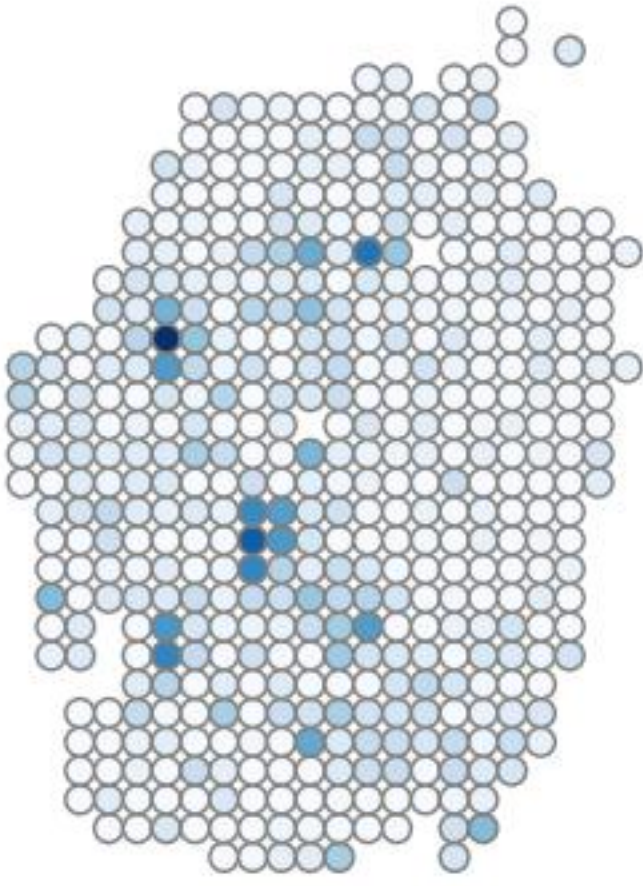

CAFs

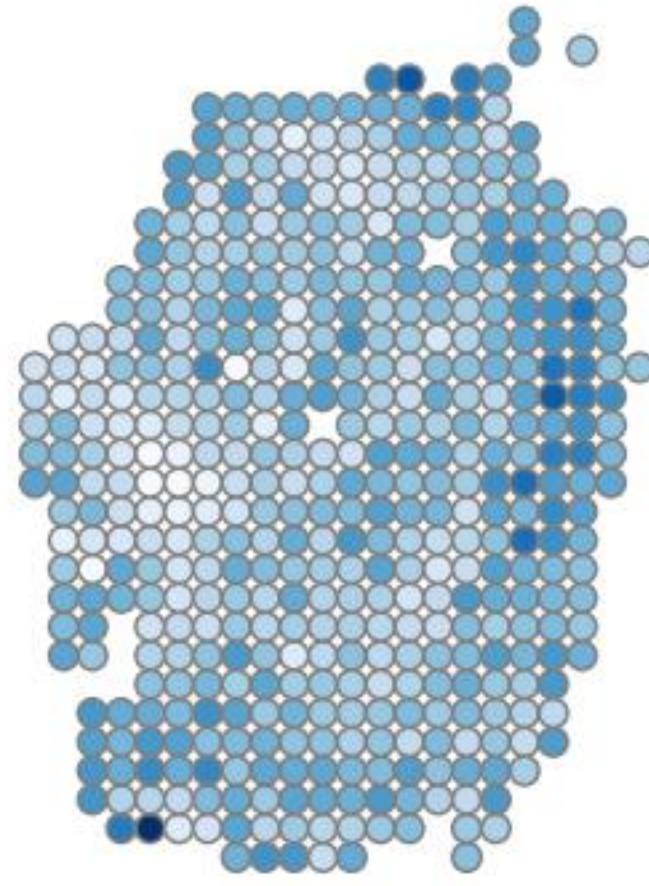

Endothelial

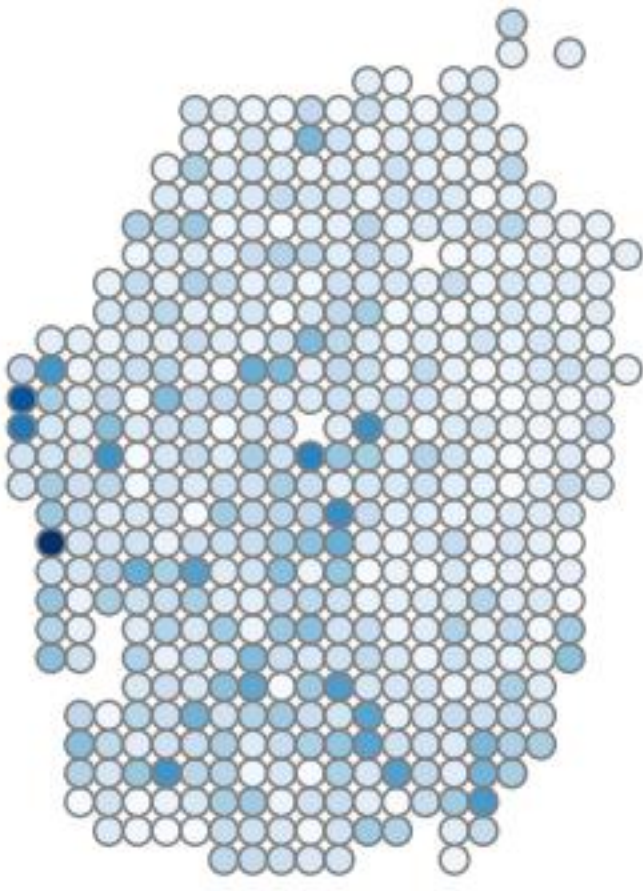

Epithelial

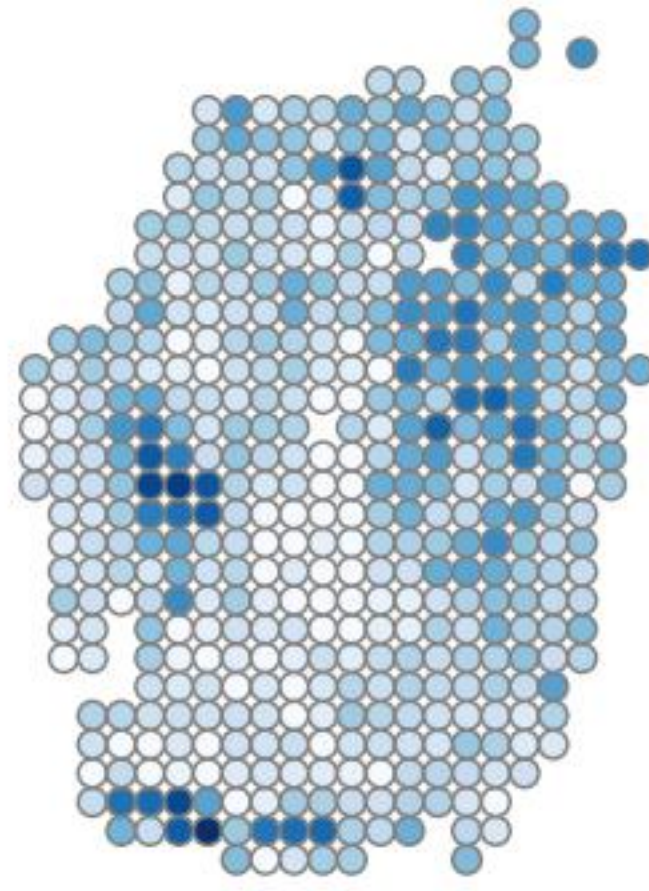

Myeloid

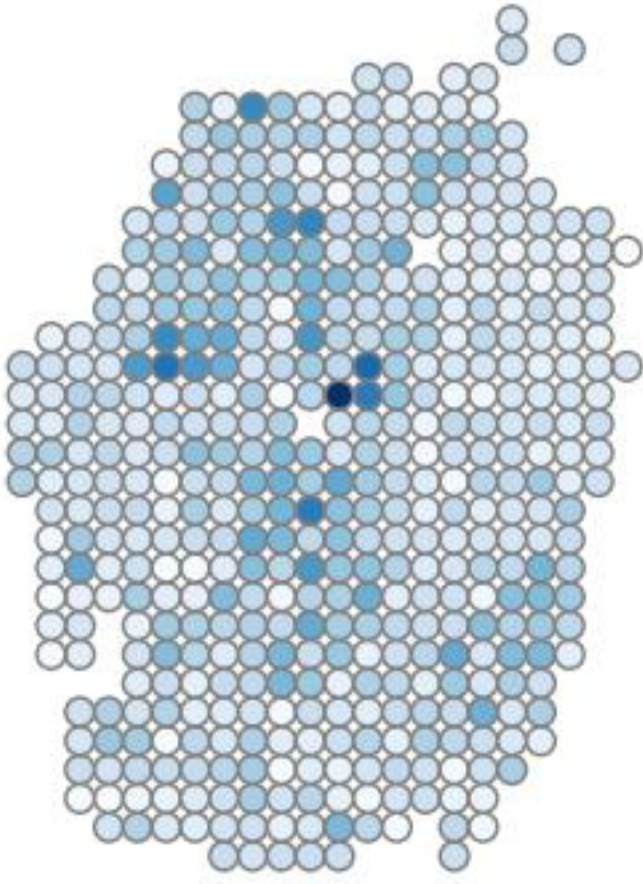

Plasma Cells

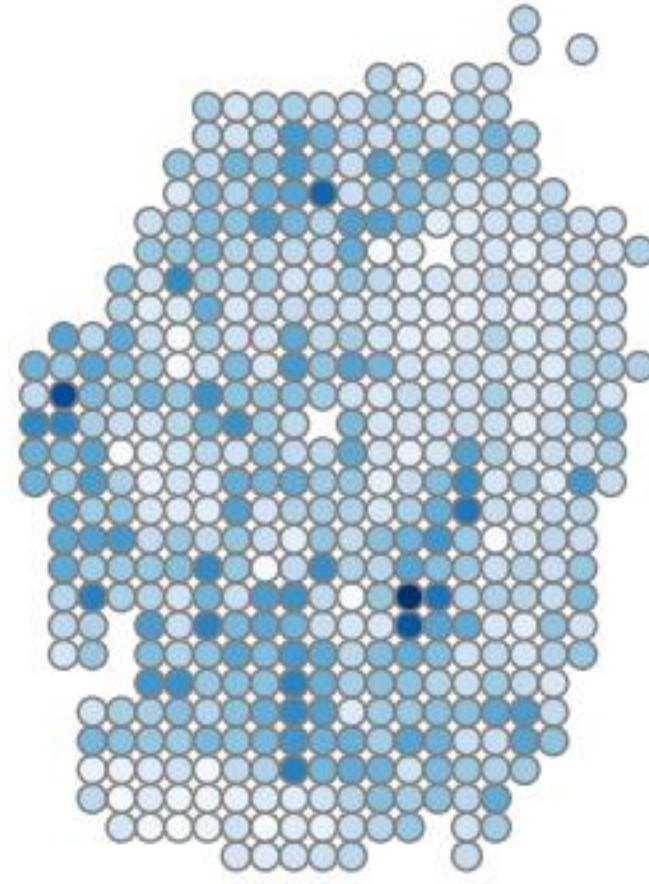

PVL

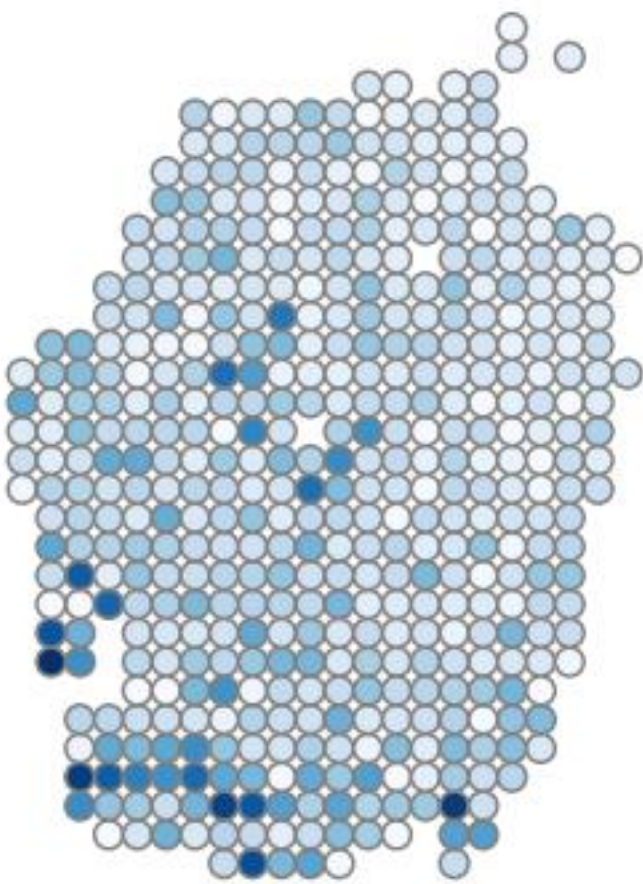

T-cells

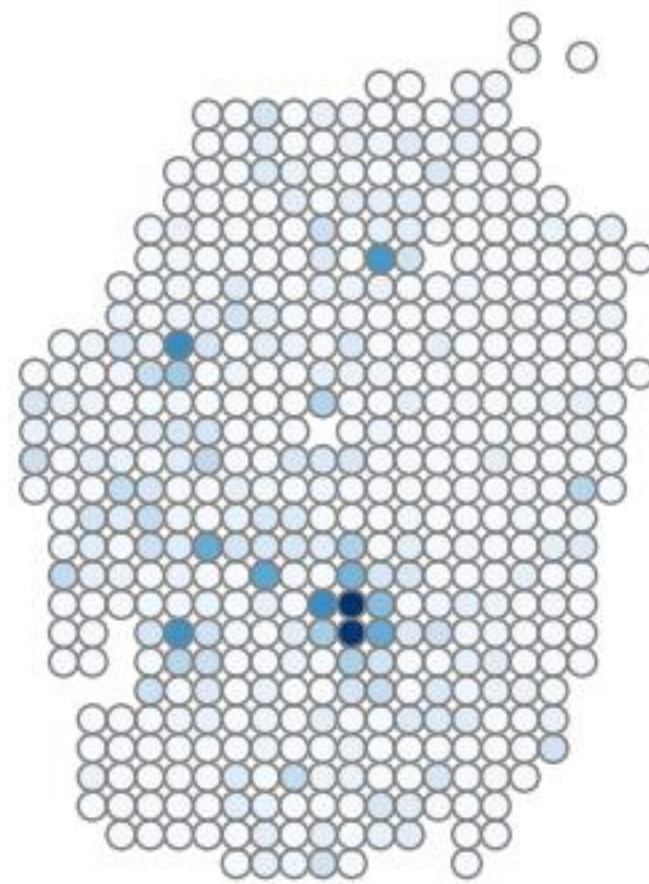

# major\_D2

B-cells

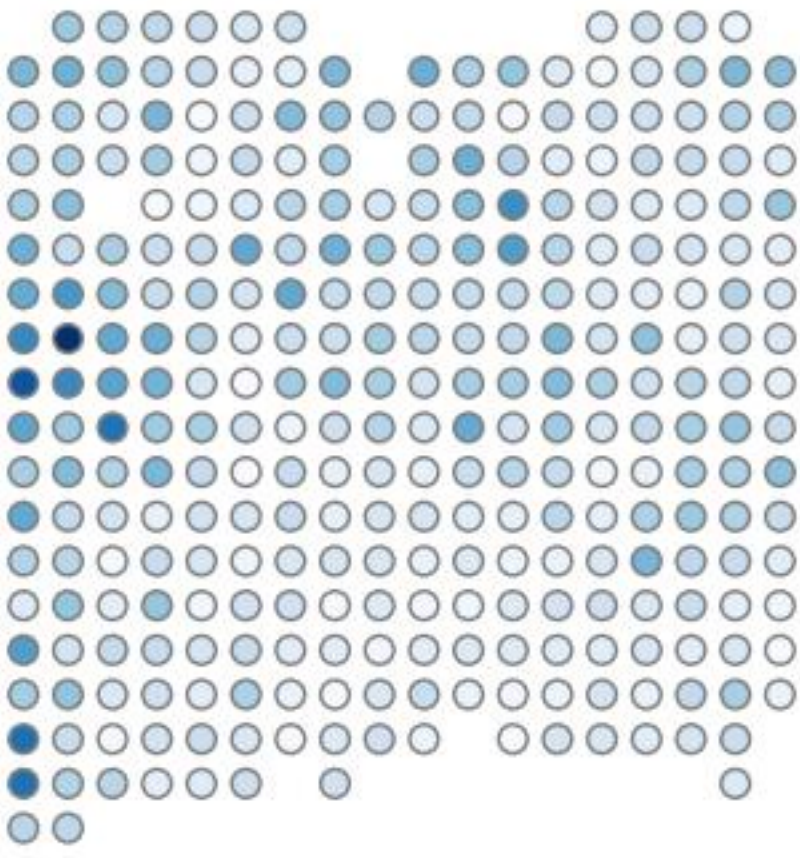

CAFs

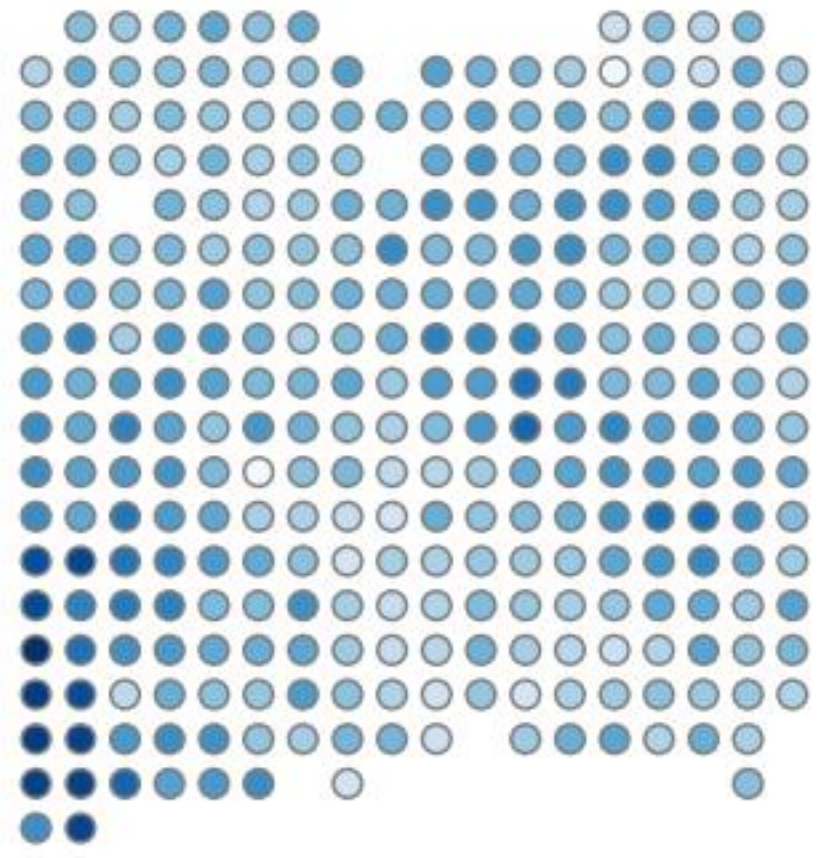

Endothelial

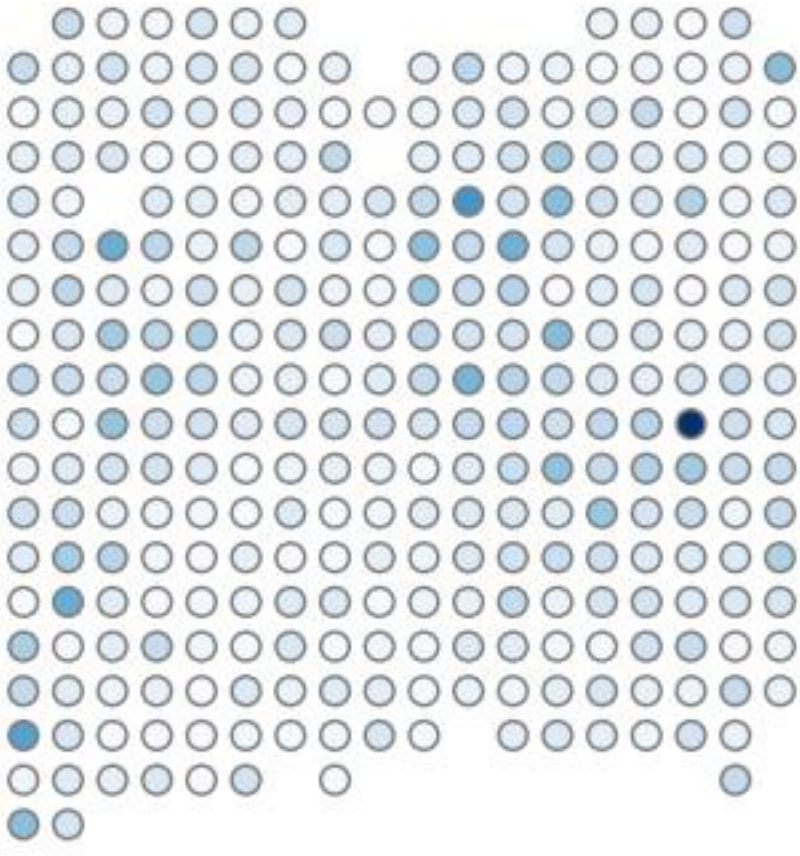

Epithelial

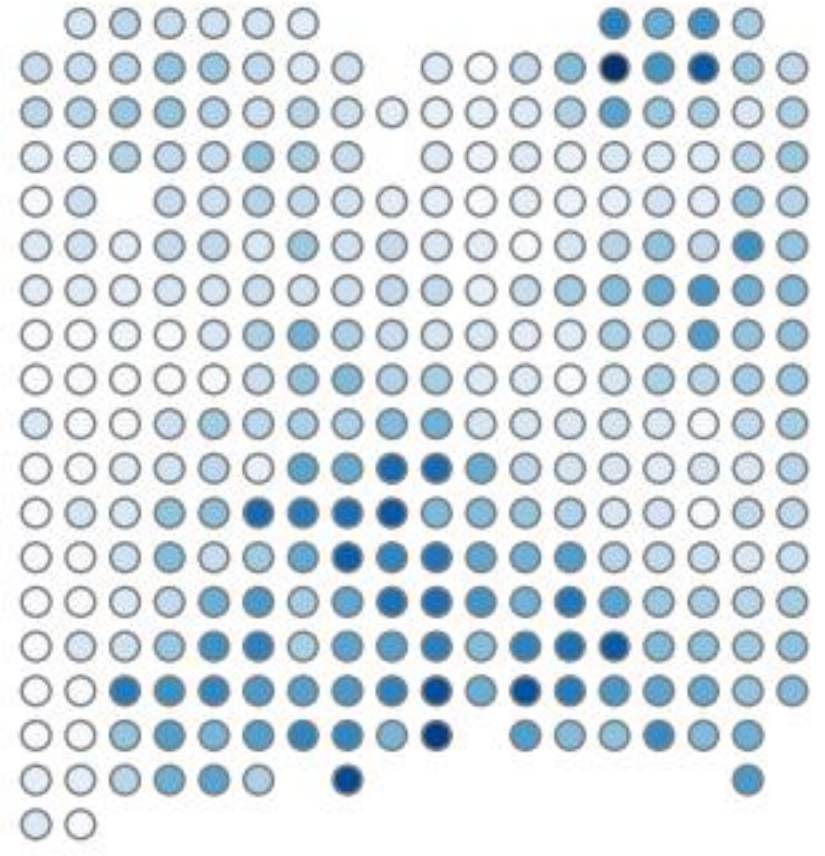

Myeloid

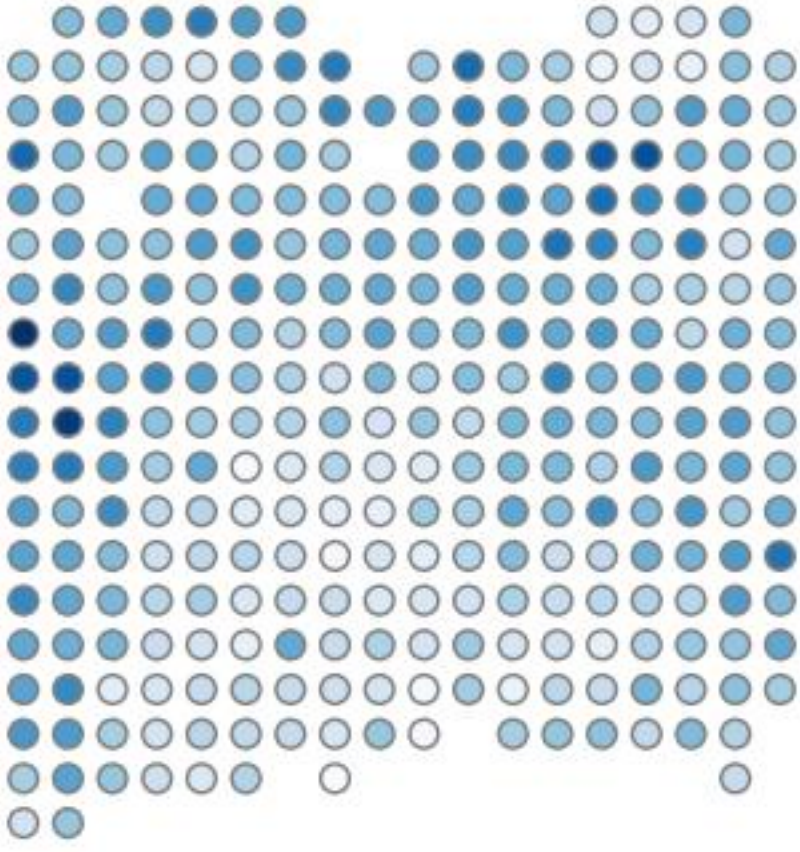

Plasma Cells

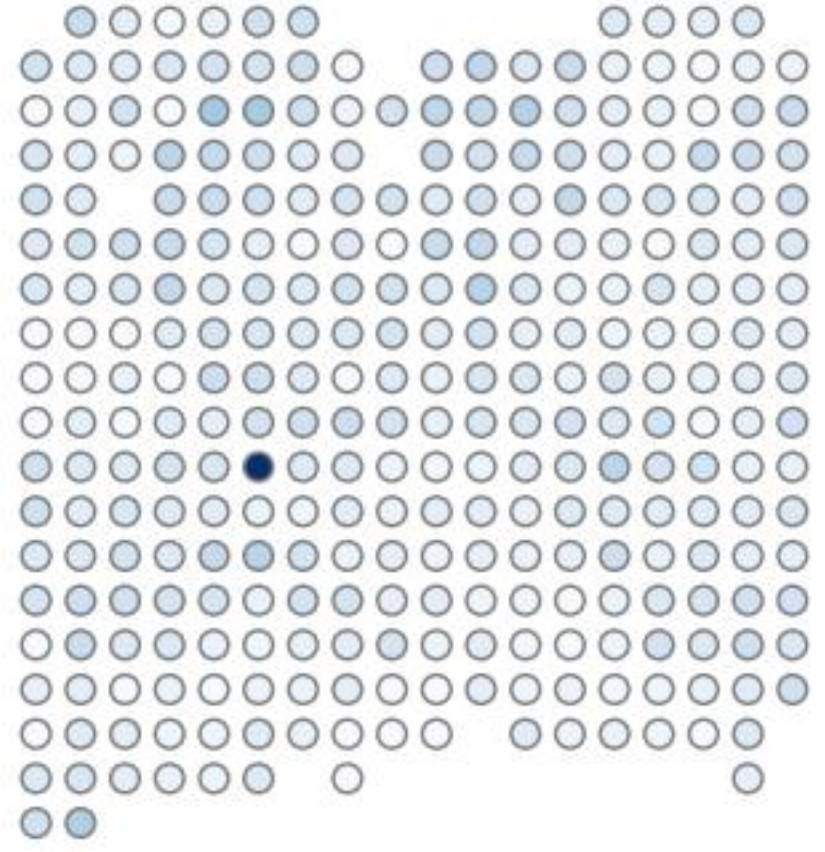

PVL

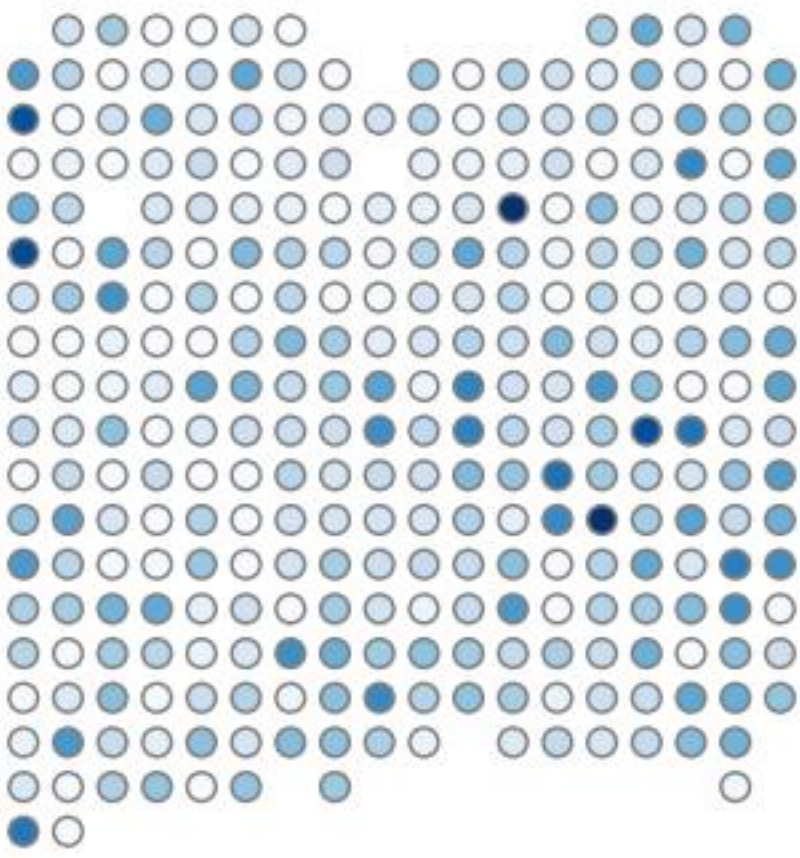

T-cells

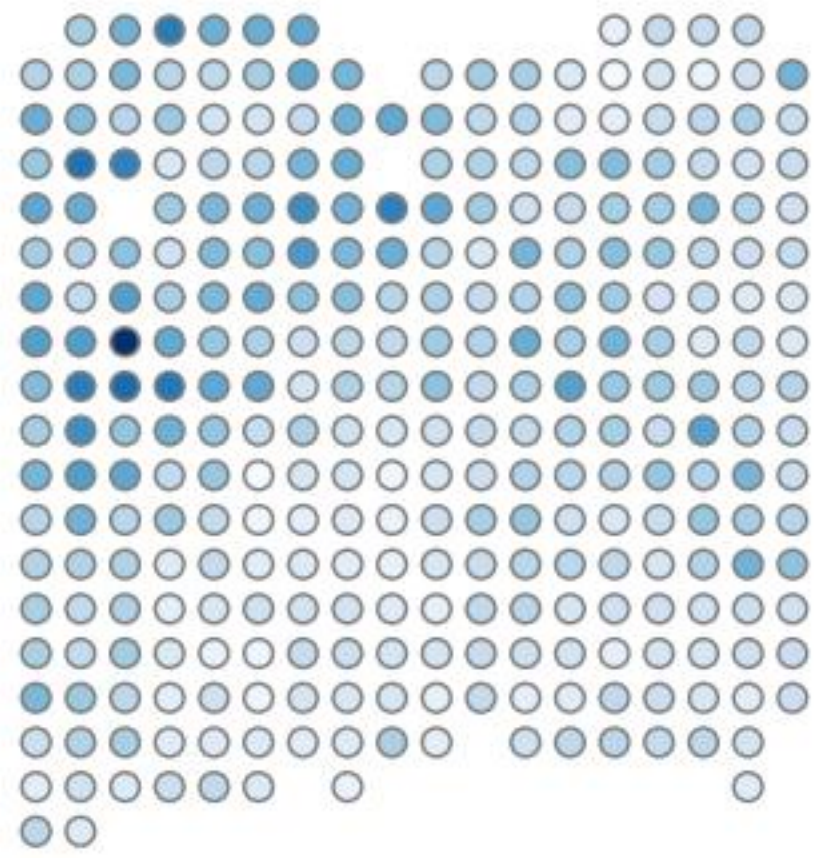

# major\_D4

B-cells

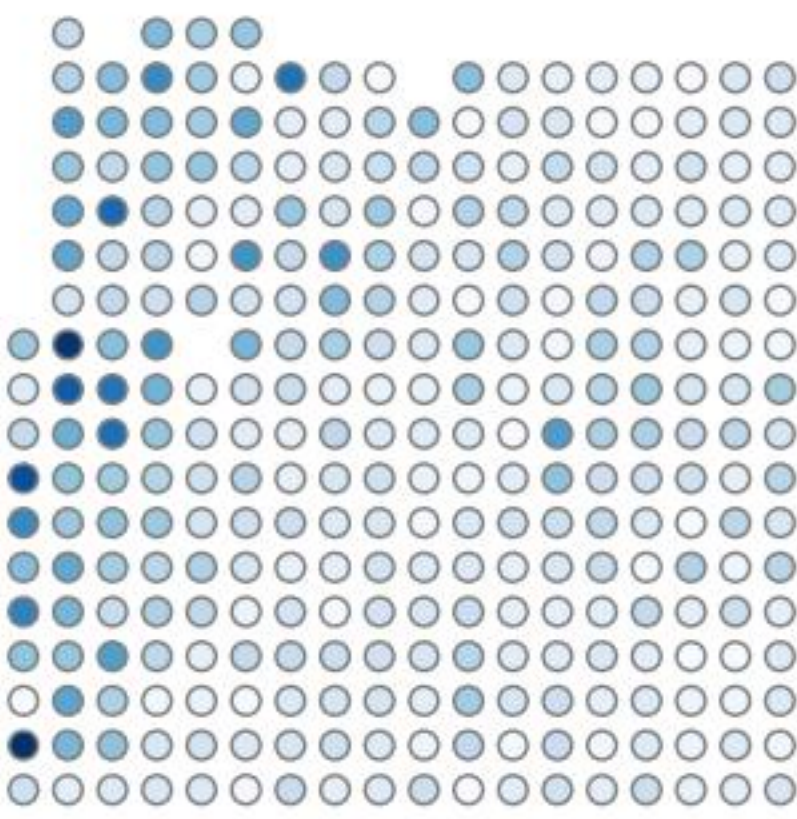

CAFs

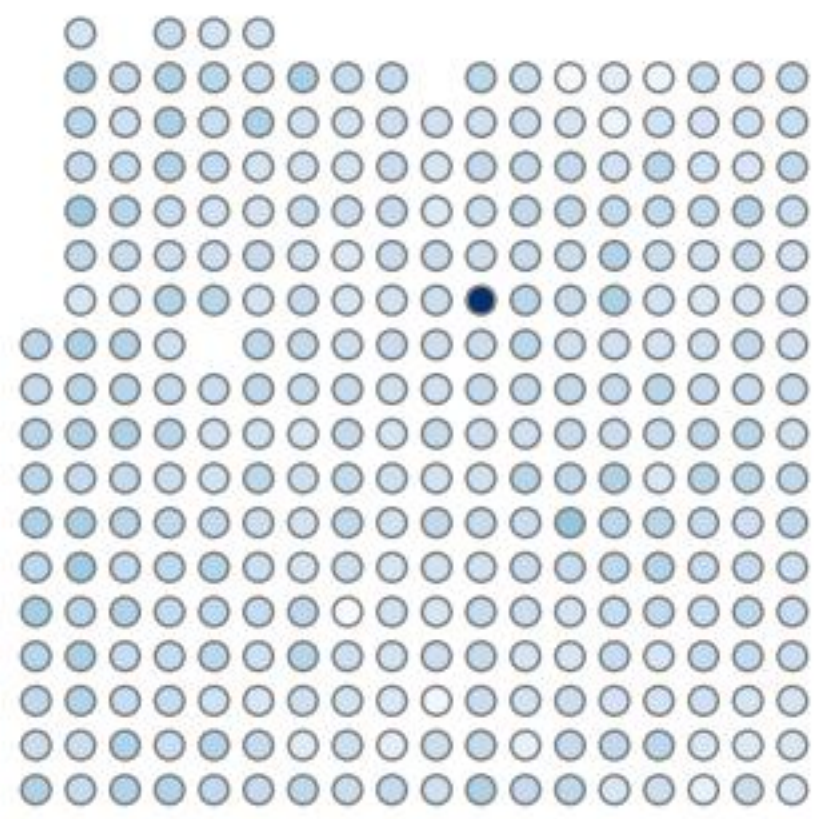

Endothelial

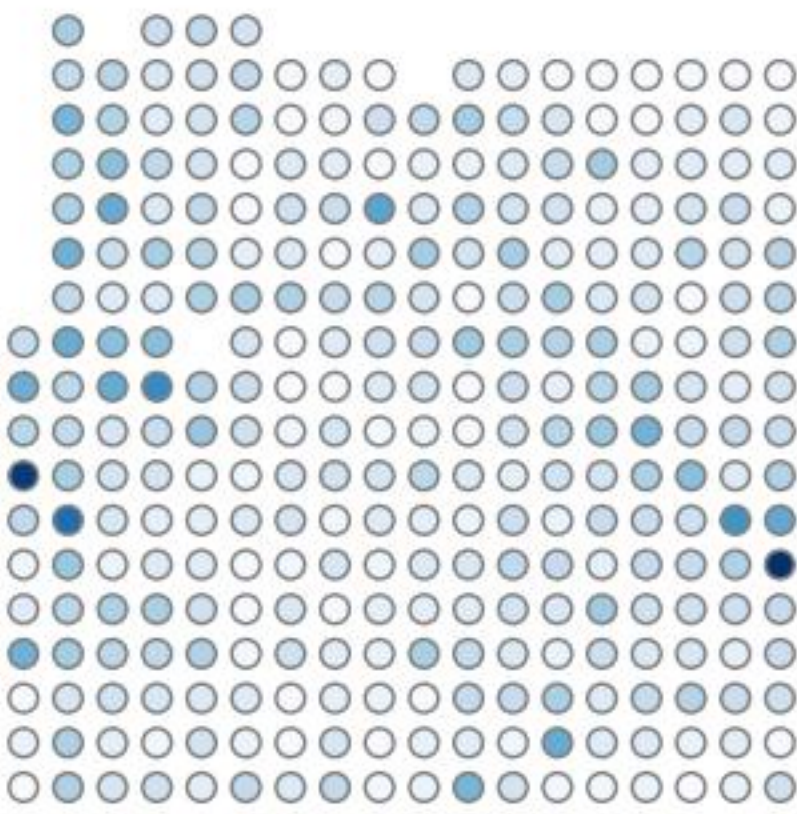

Epithelial

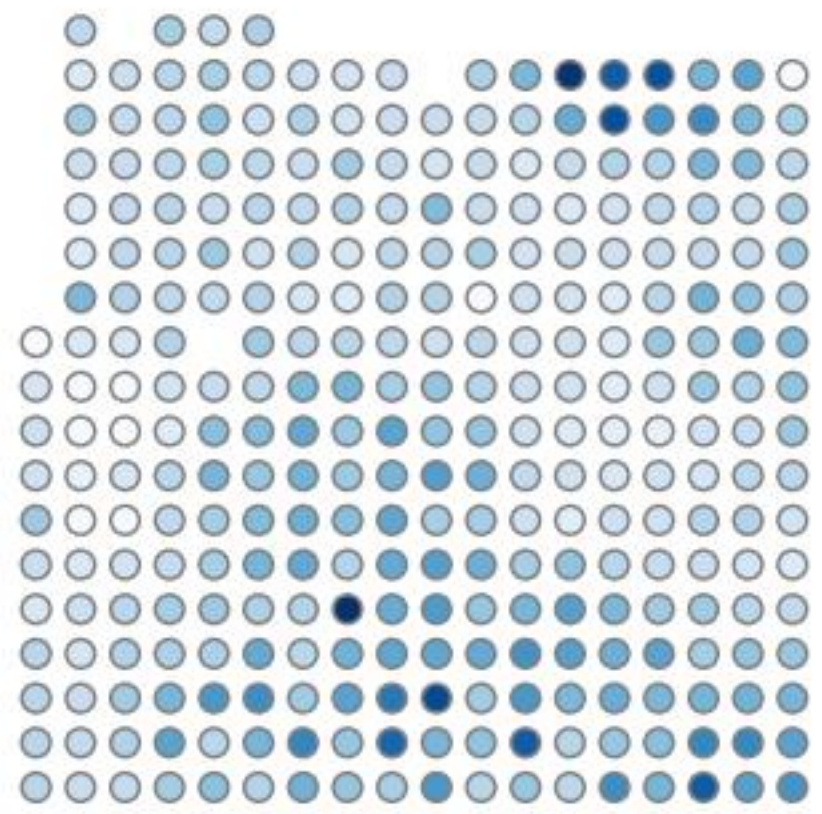

Myeloid

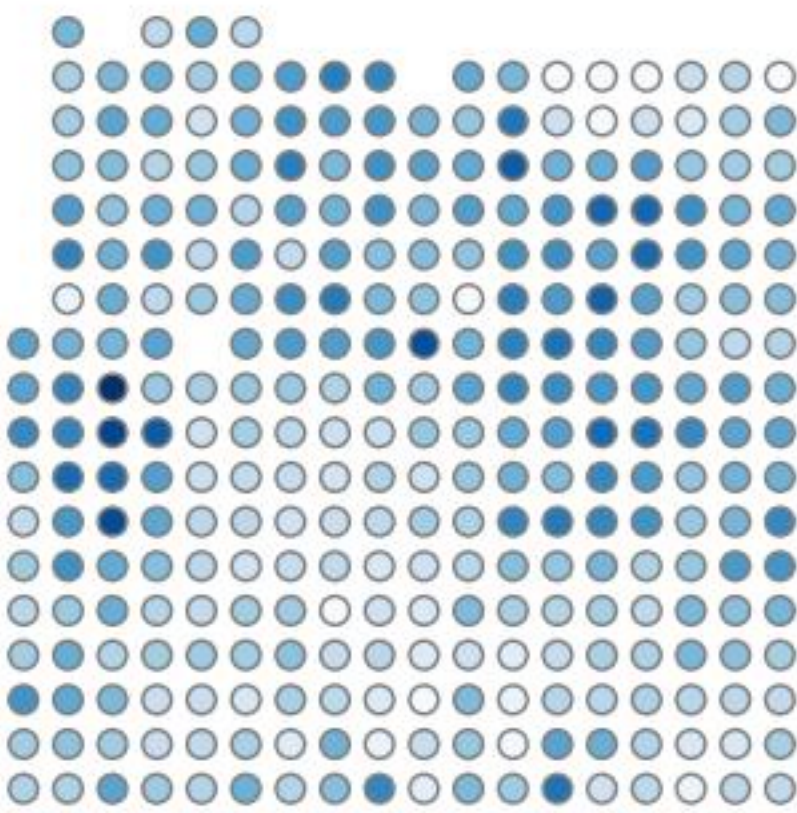

Plasma Cells

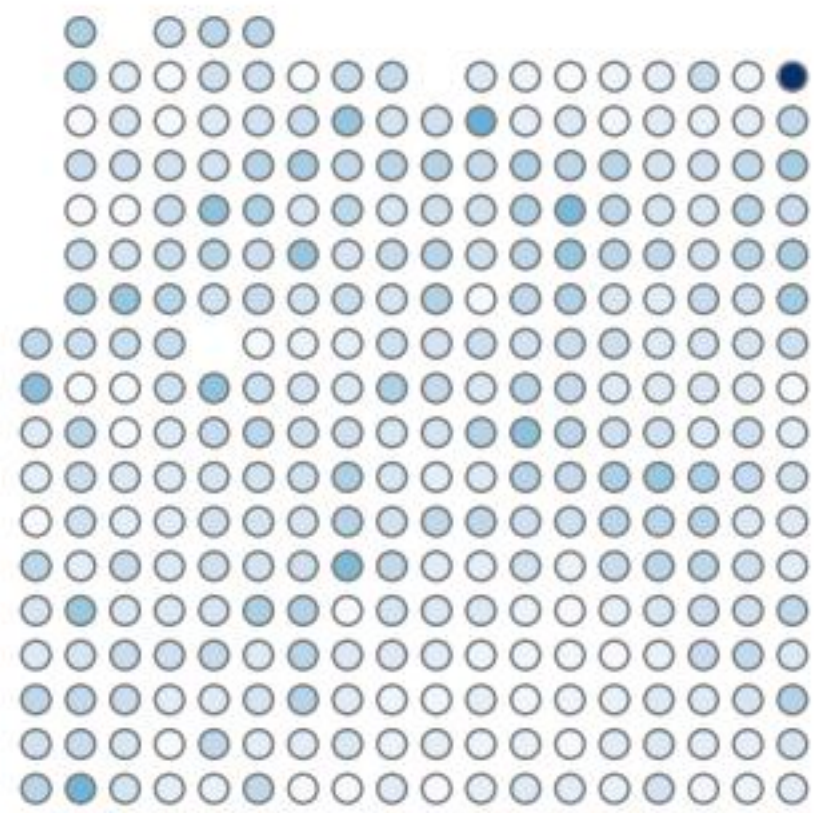

PVL

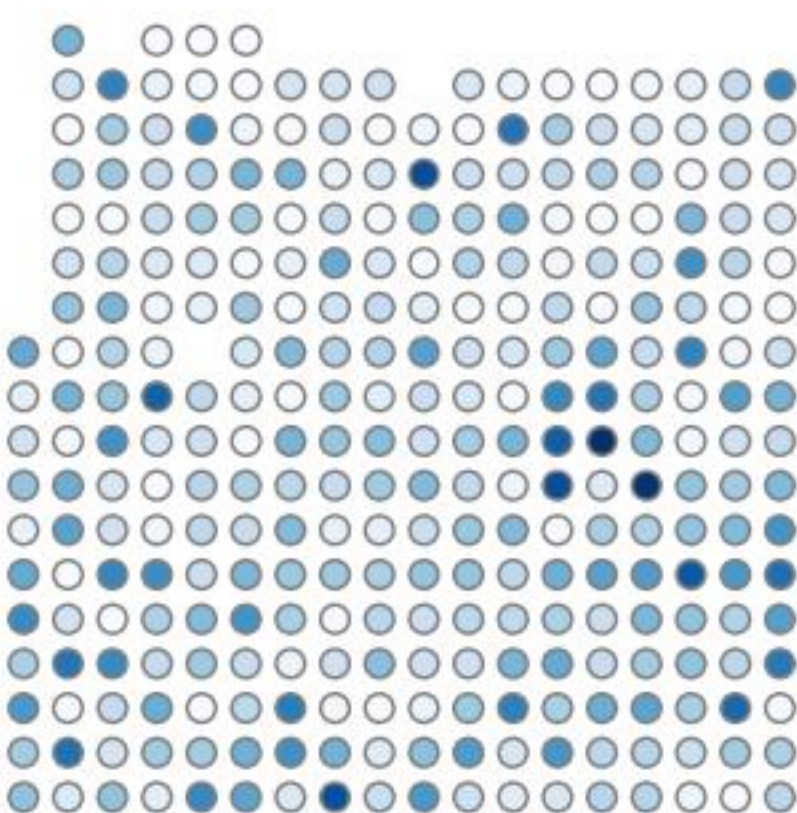

T-cells

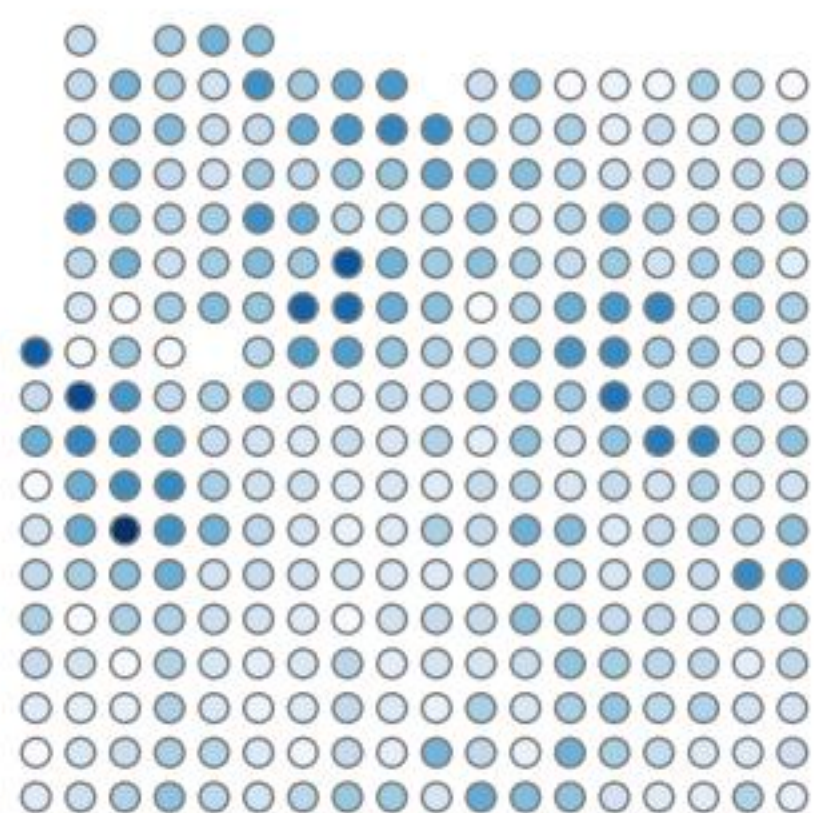

# major\_C5

B-cells

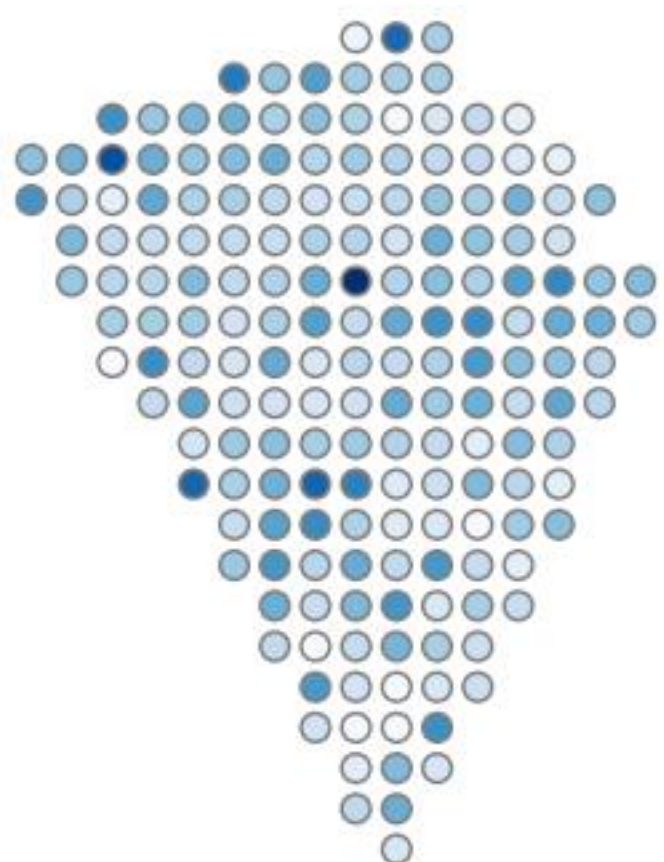

CAFs

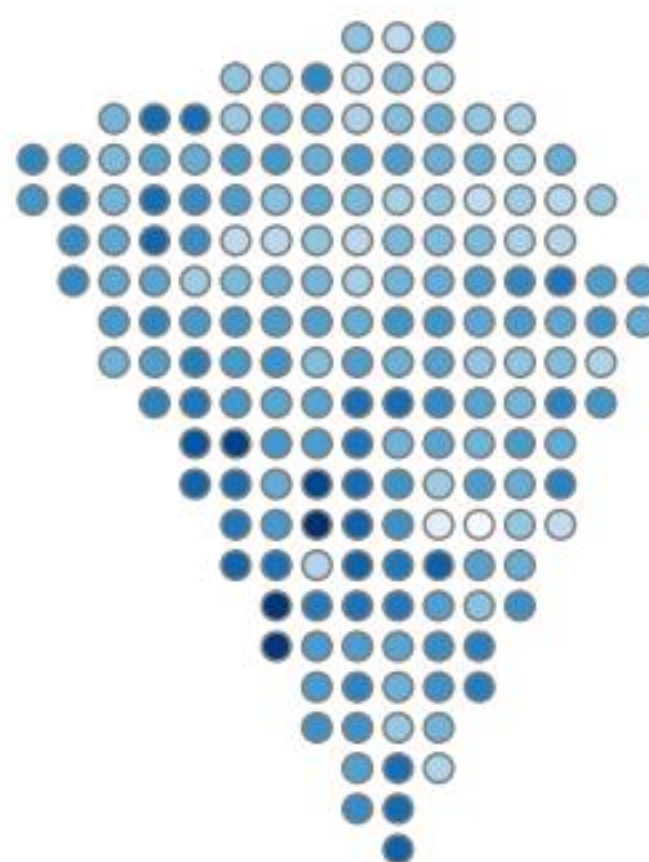

Endothelial

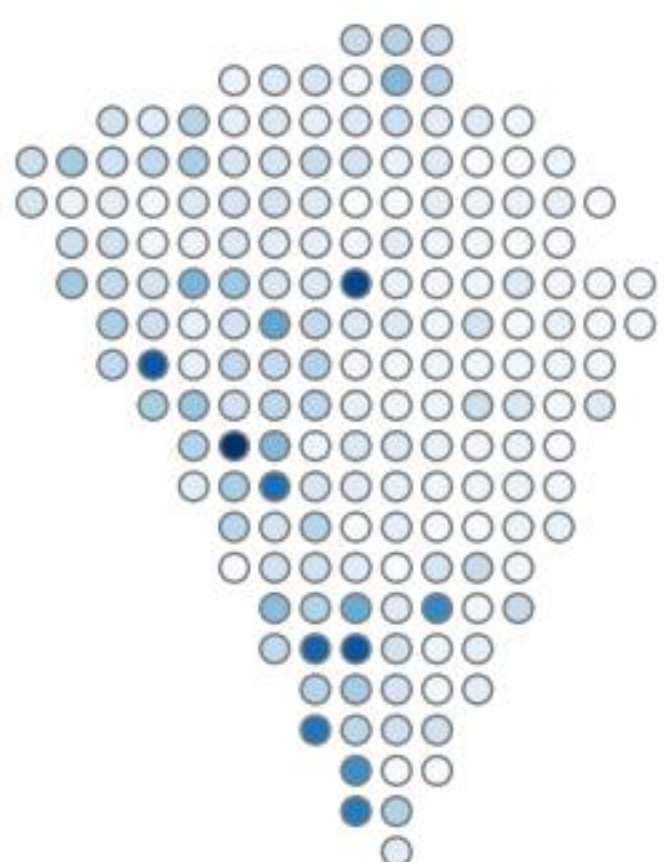

Epithelial

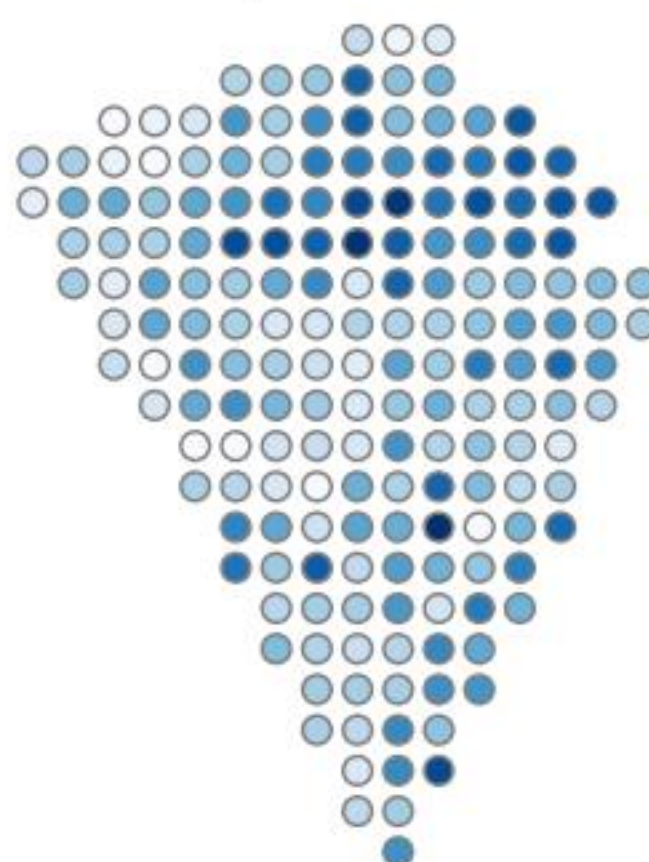

Myeloid

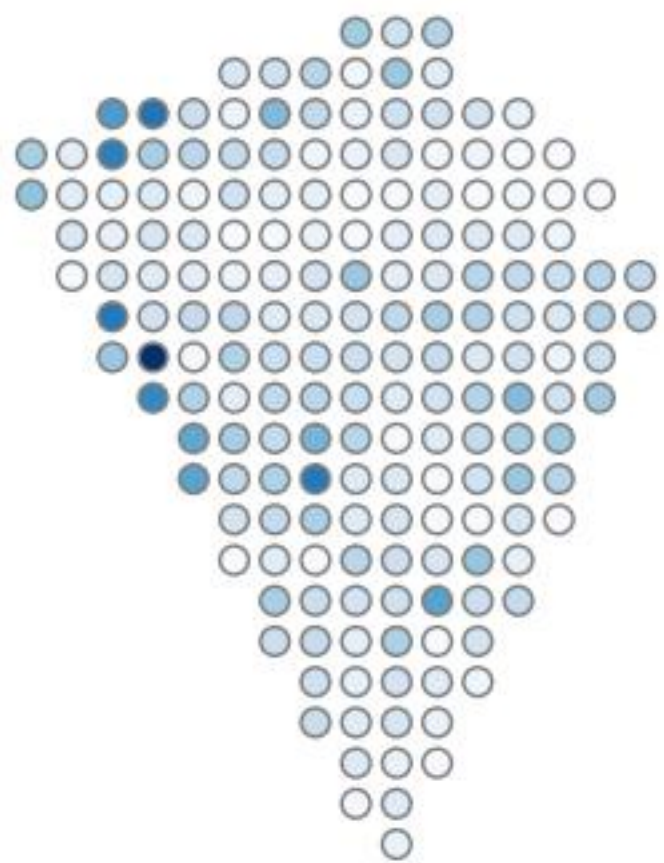

Plasma Cells

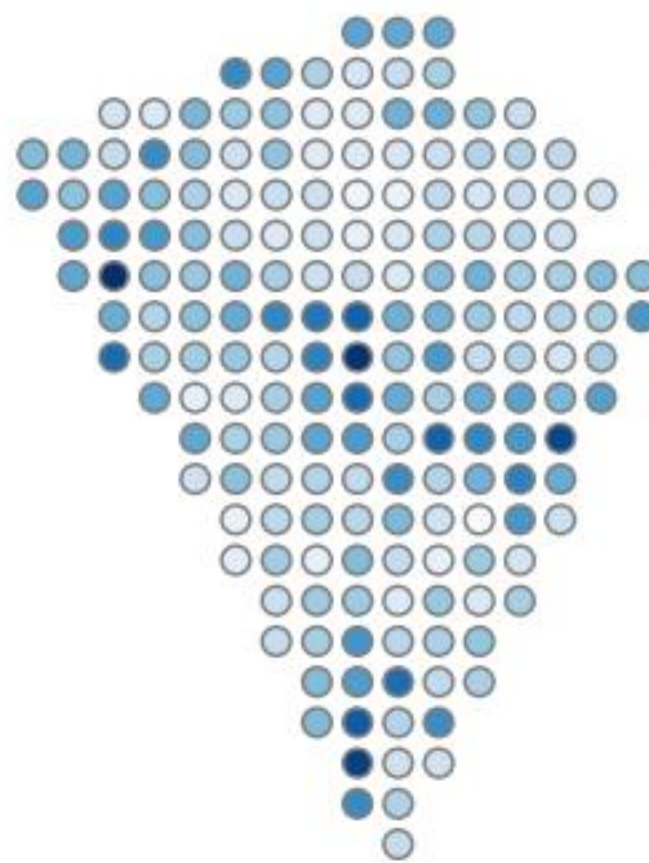

PVL

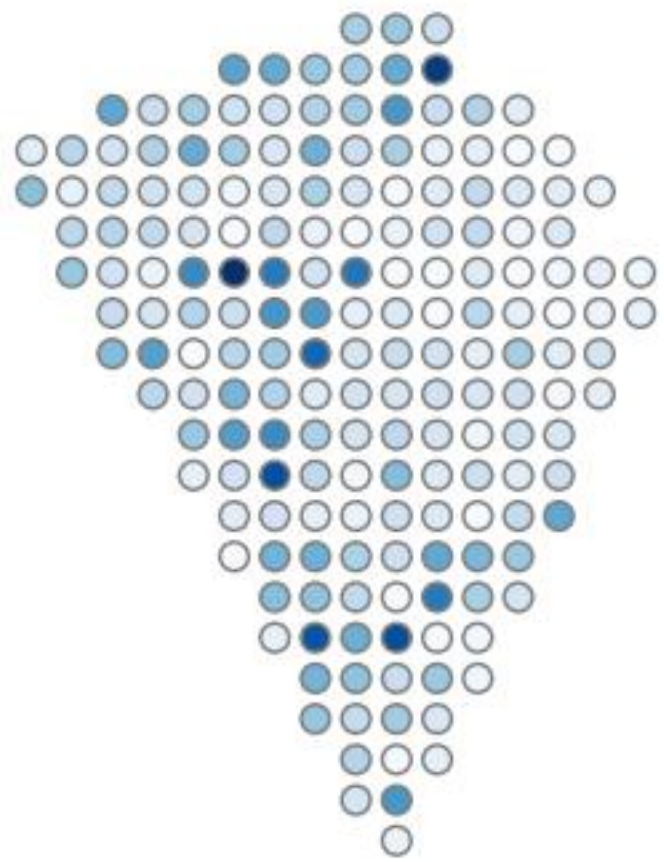

T-cells

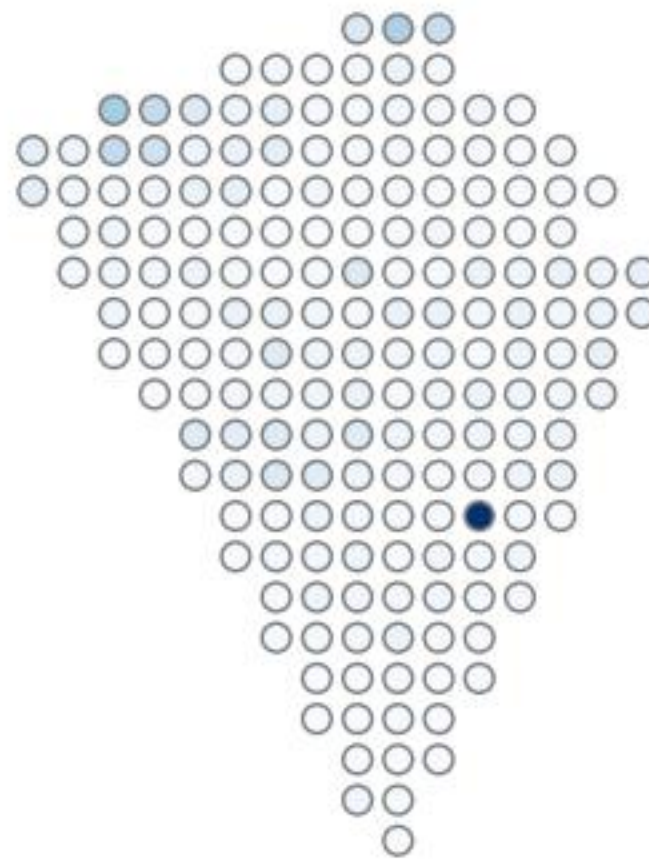

# major\_E3

B-cells

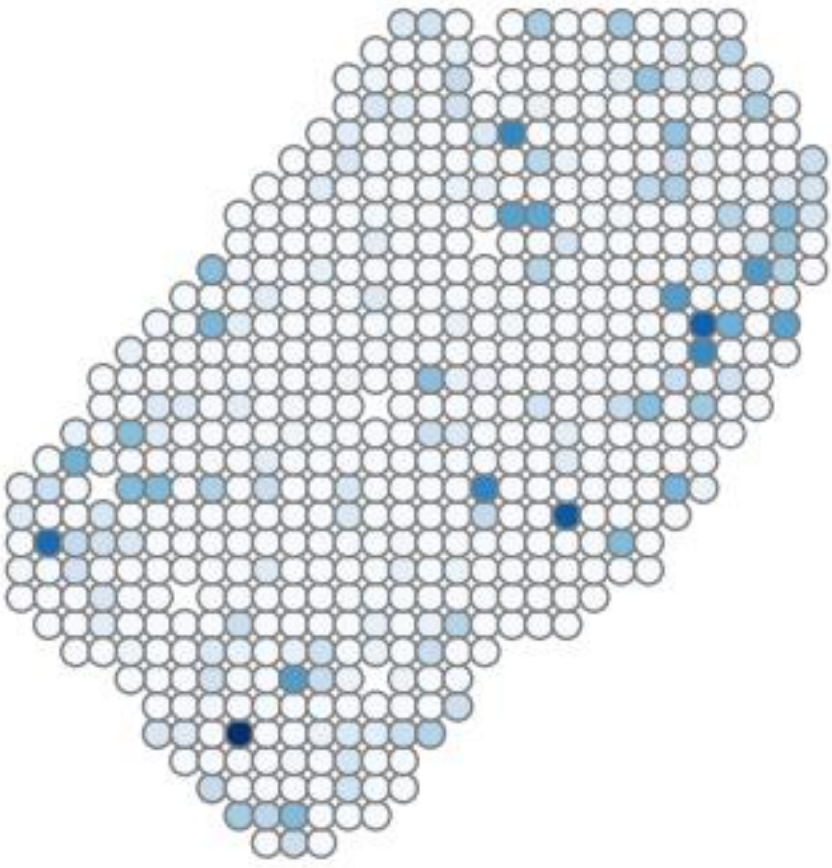

CAFs

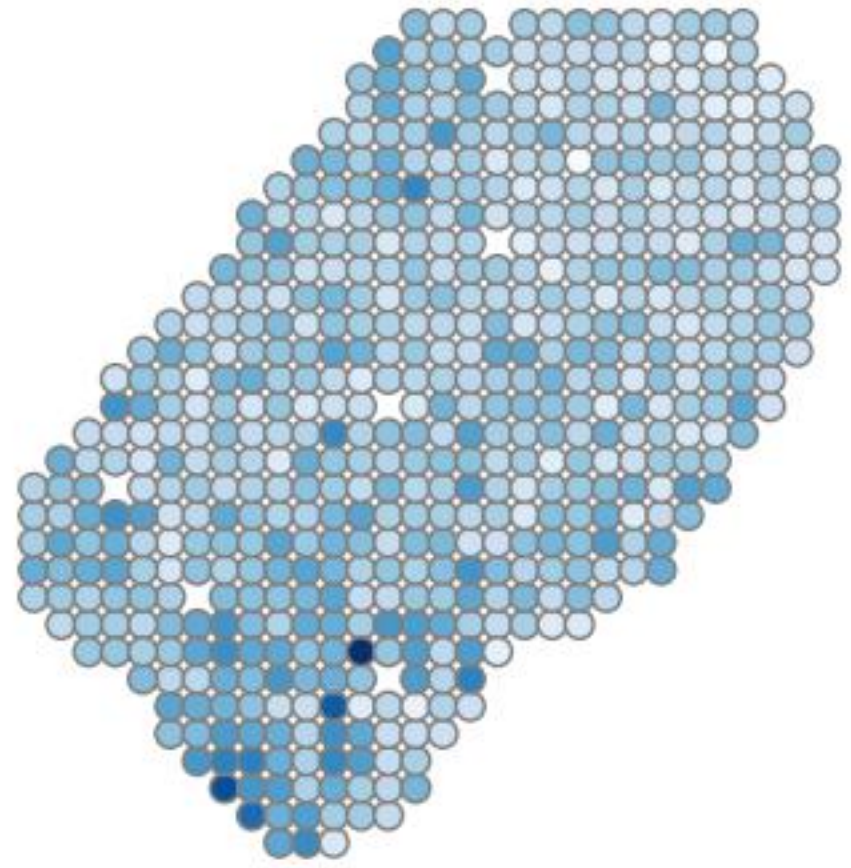

Endothelial

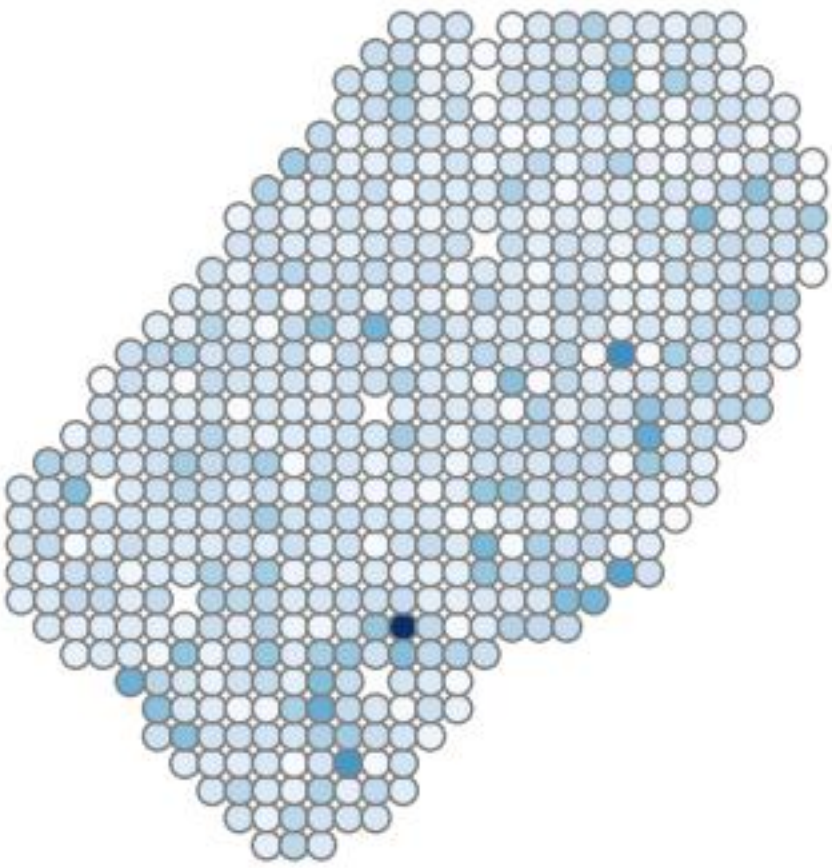

Epithelial

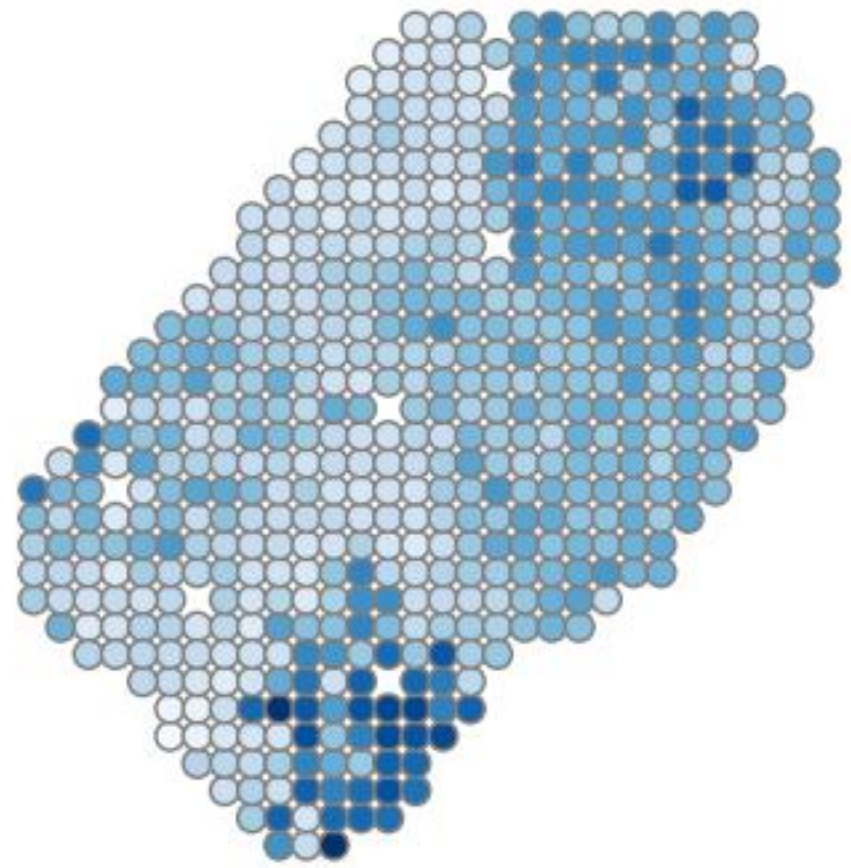

Myeloid

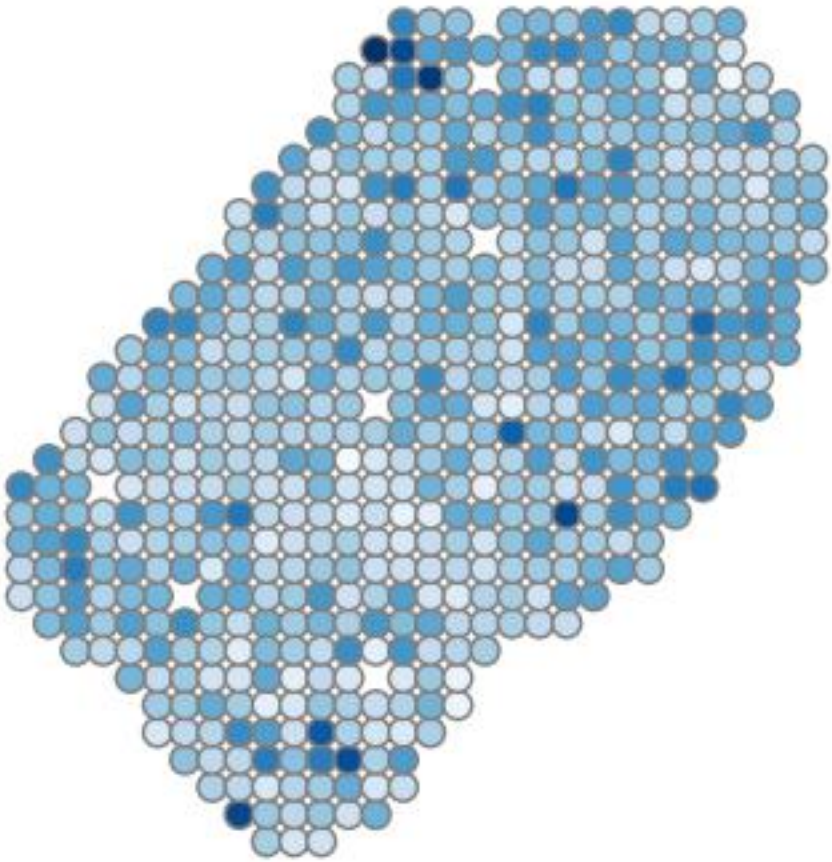

Plasma Cells

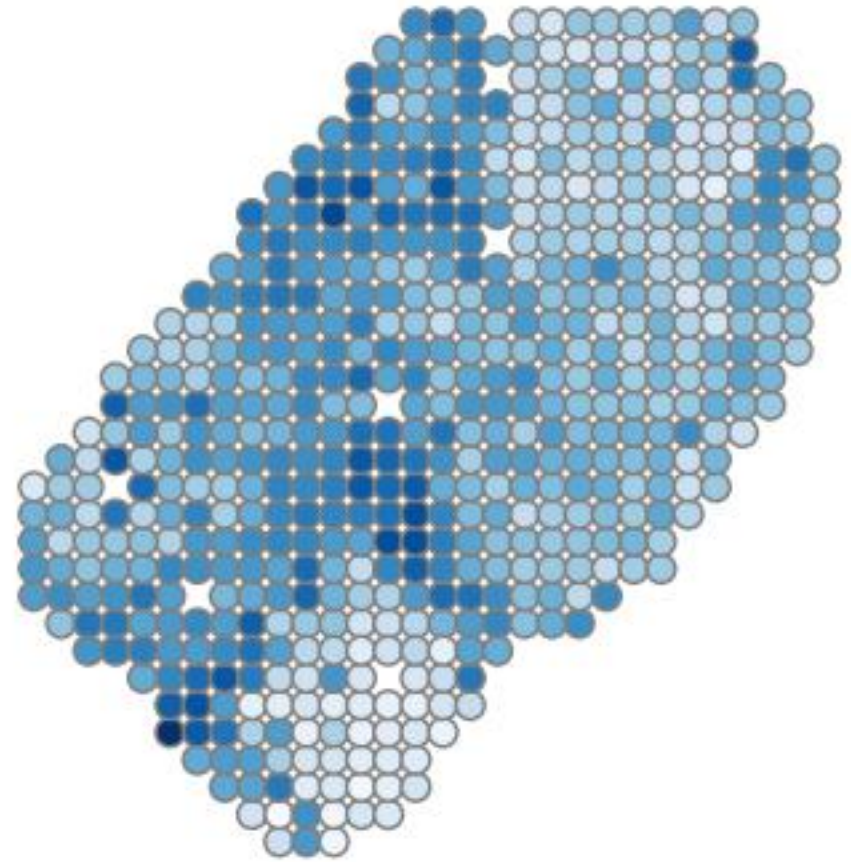

PVL

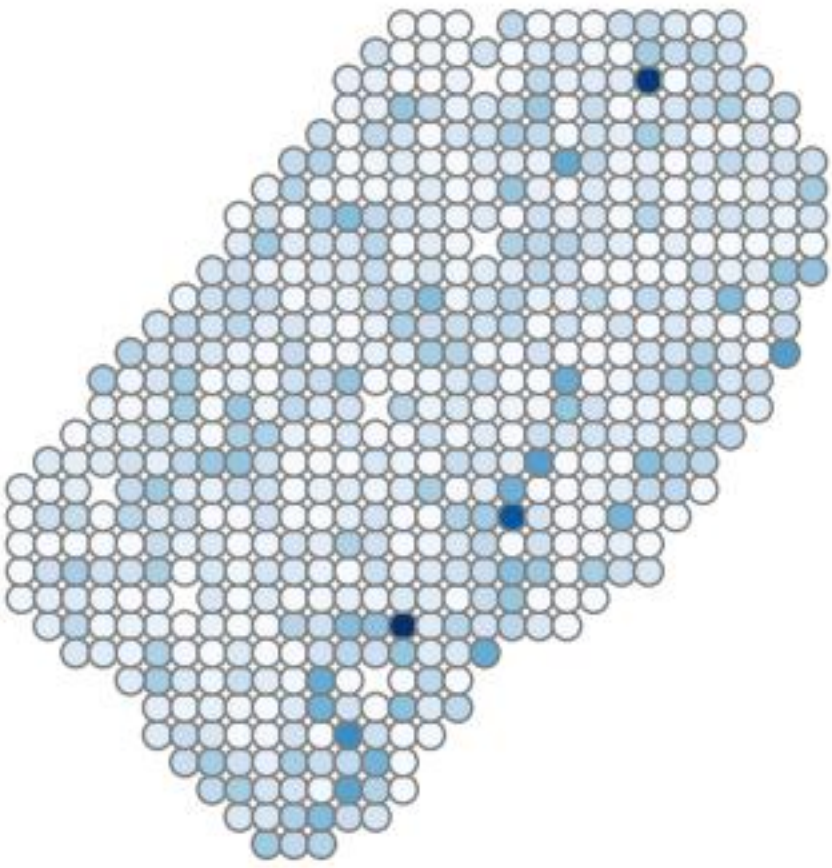

T-cells

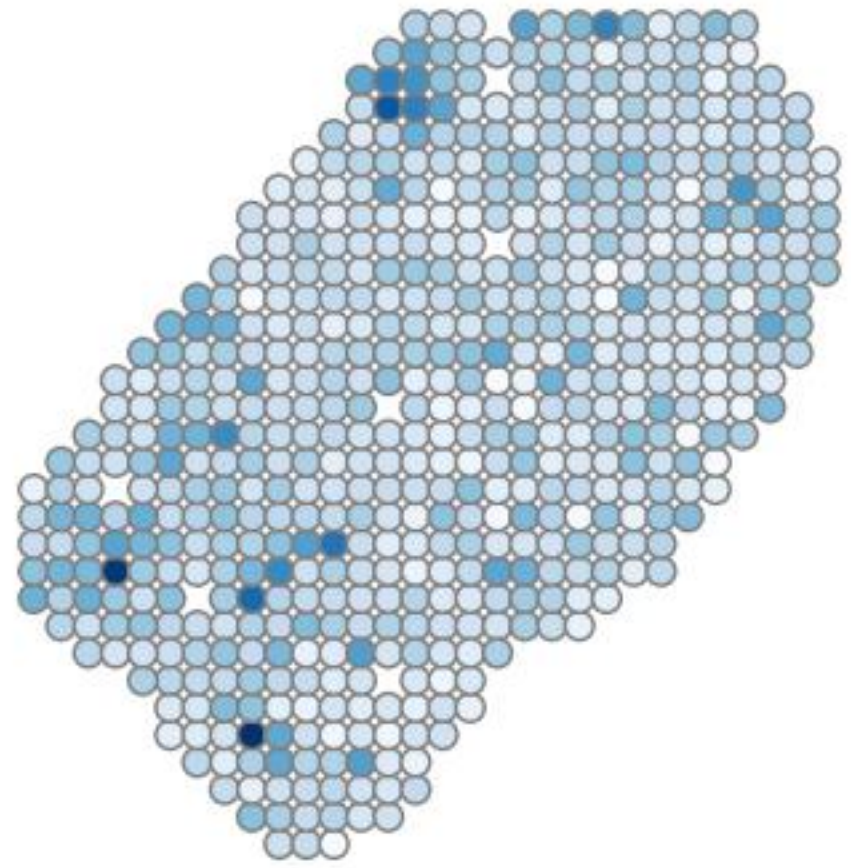

# major\_G1

B-cells

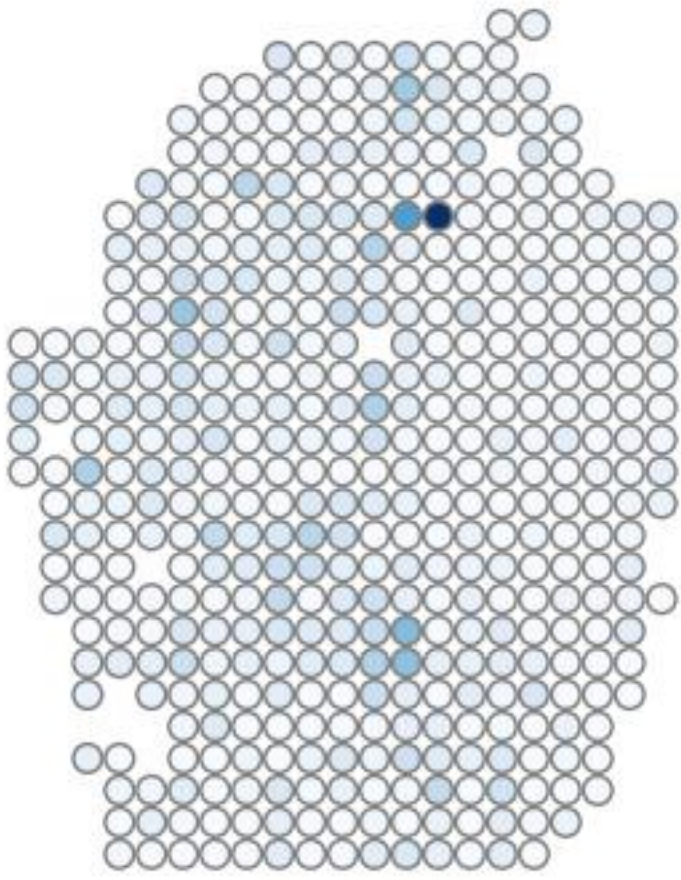

CAFs

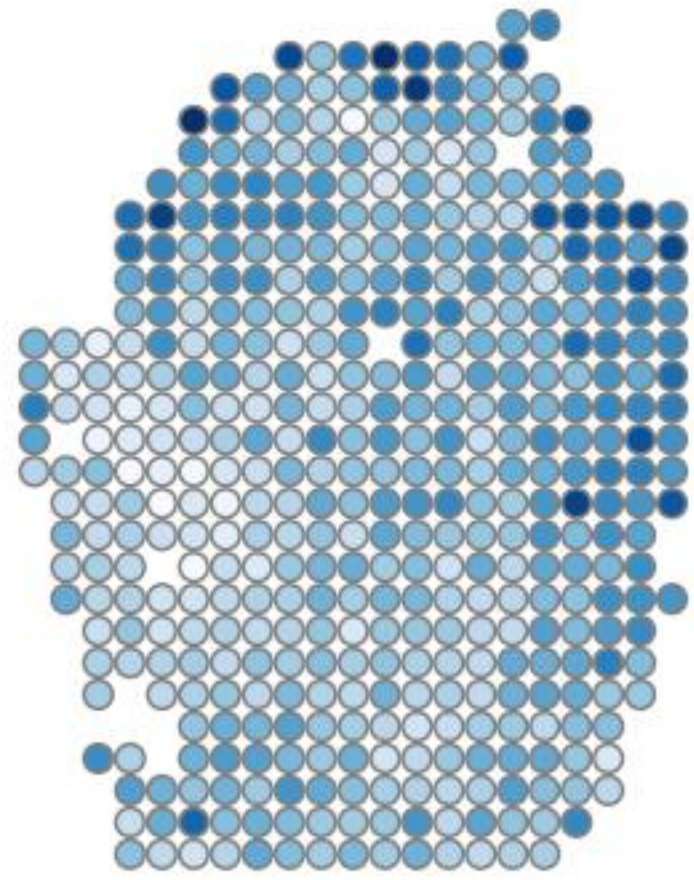

Endothelial

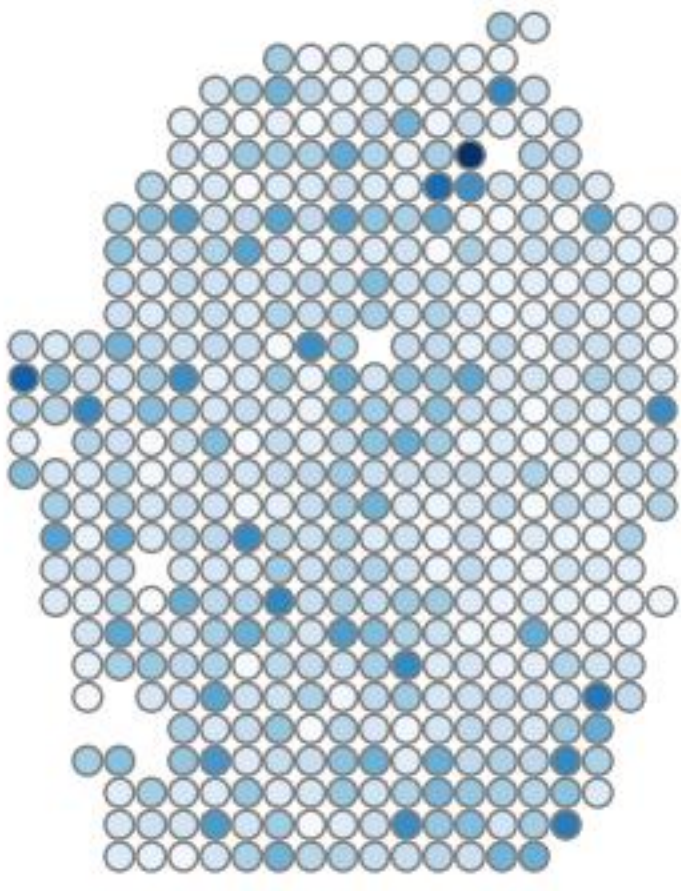

Epithelial

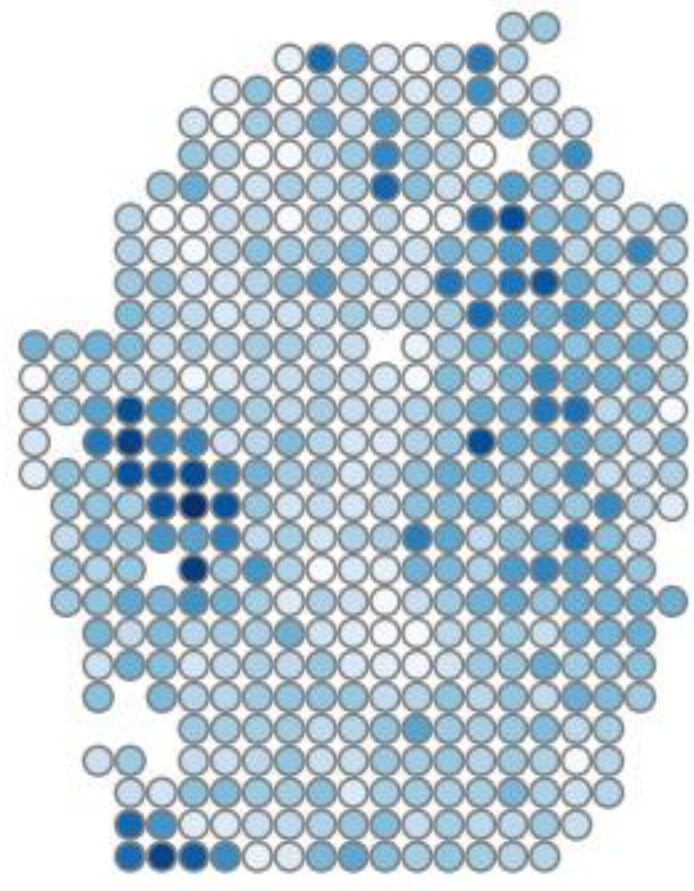

Myeloid

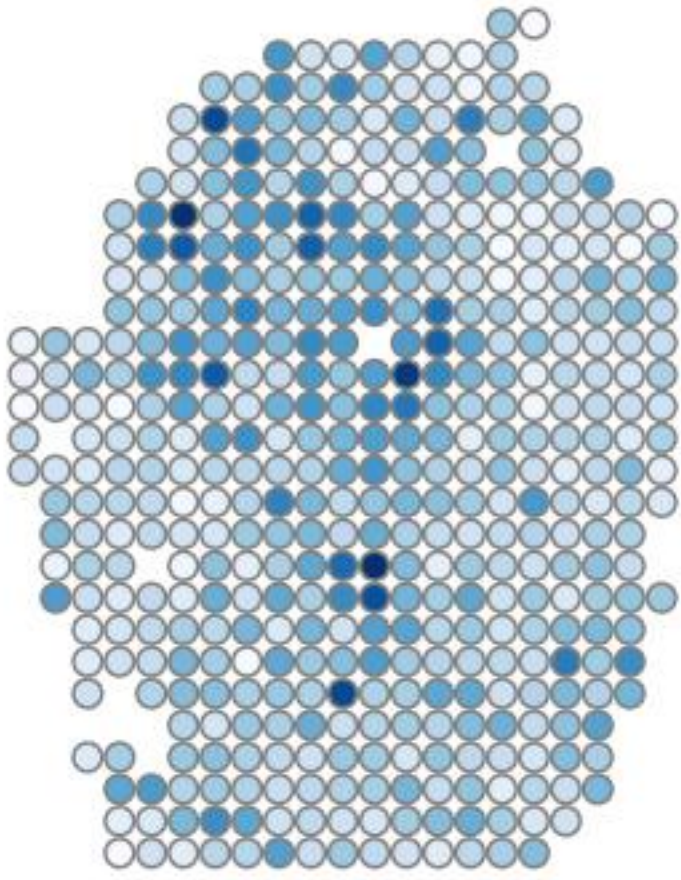

Plasma Cells

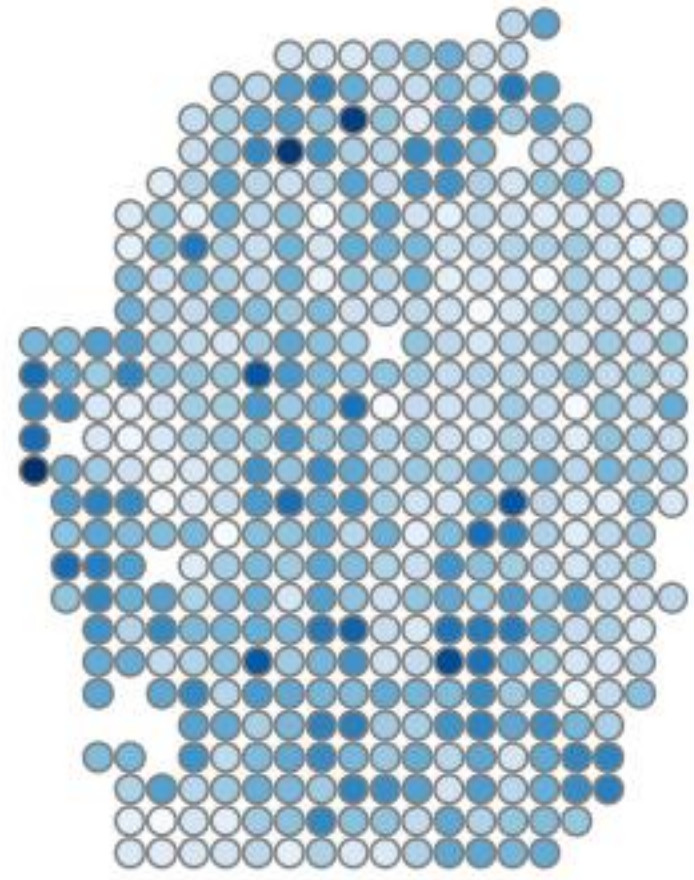

PVL

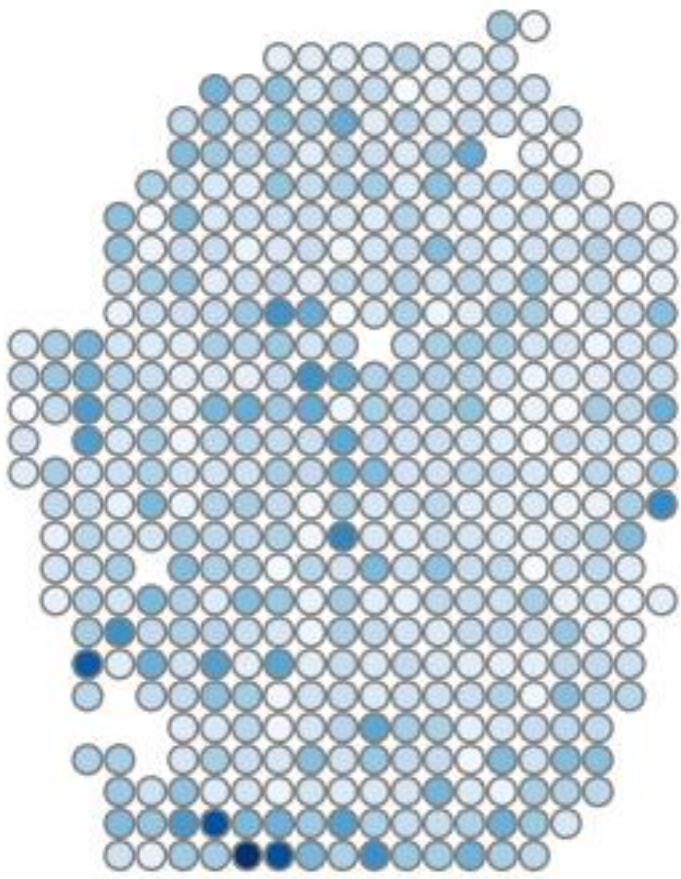

T-cells

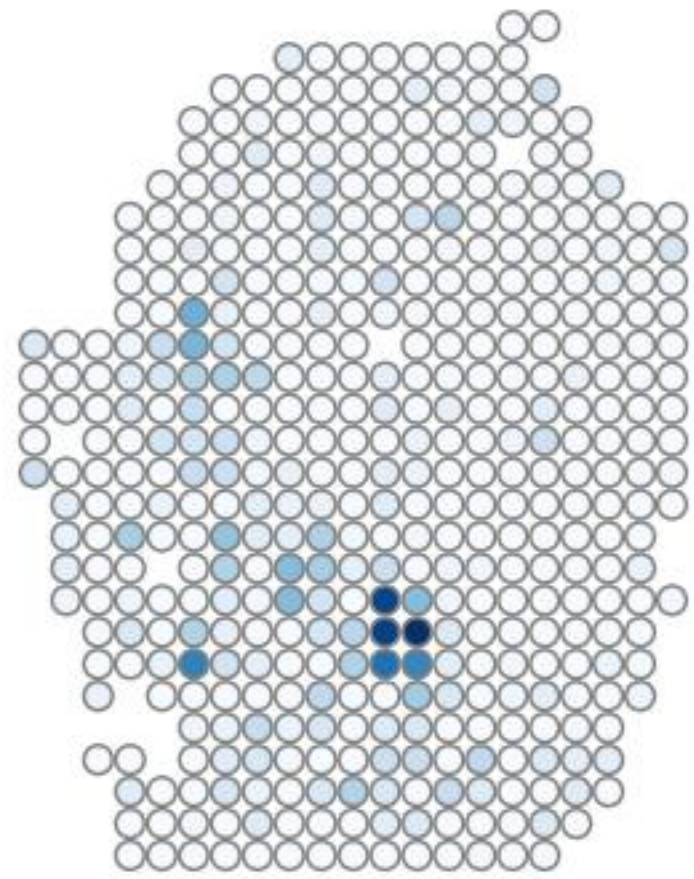



# major\_F1

B-cells

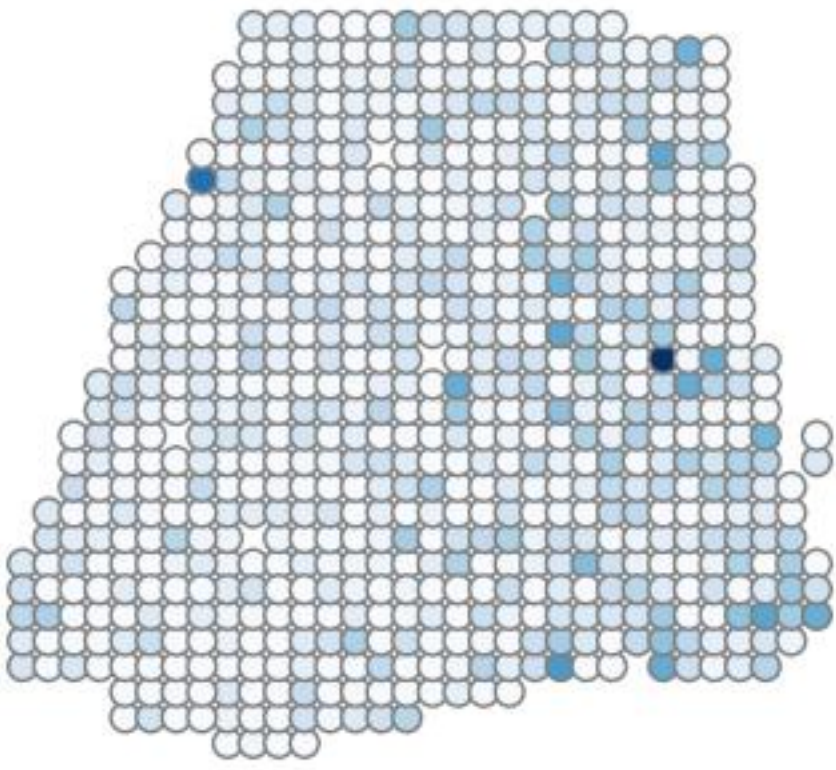

CAFs

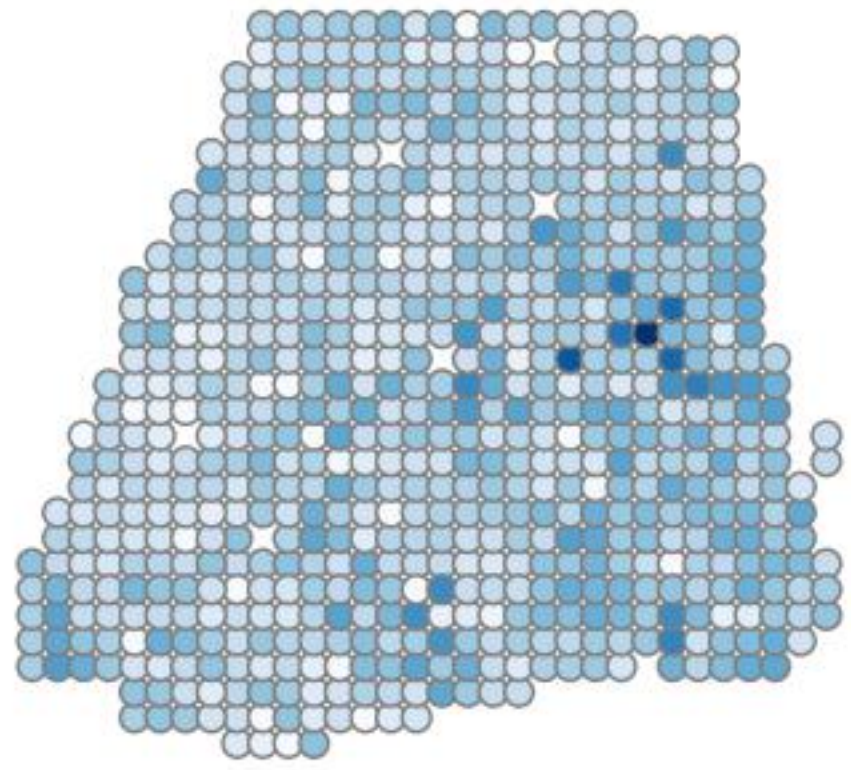

Endothelial

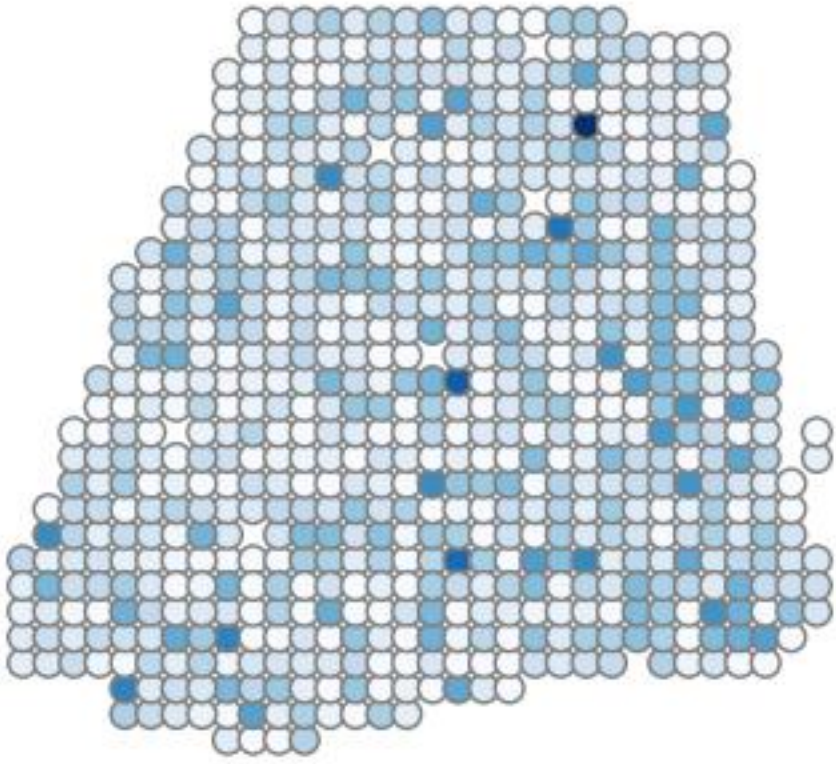

Epithelial

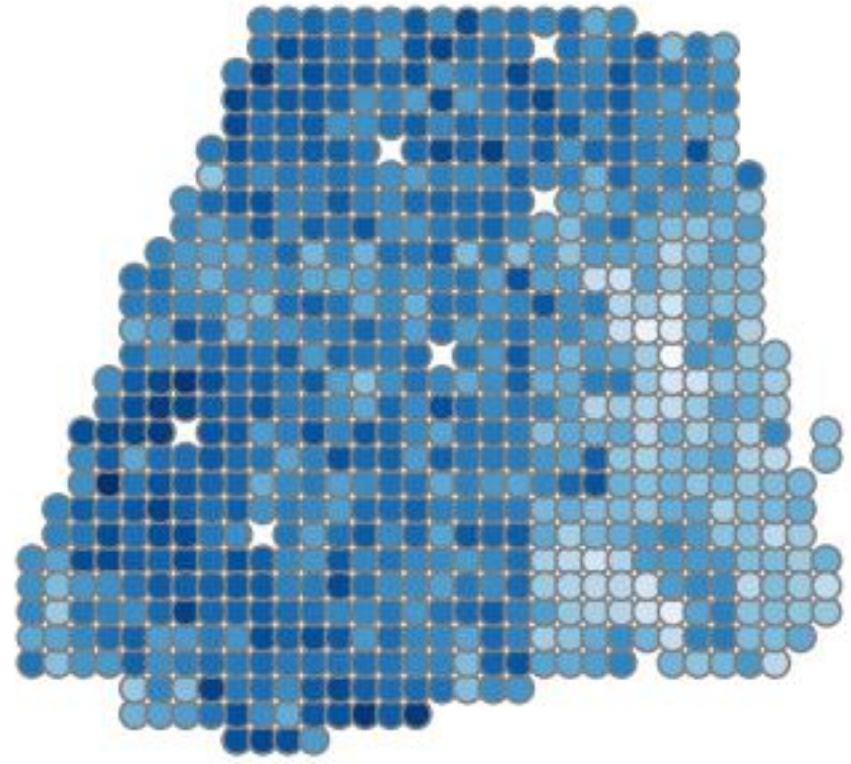

Myeloid

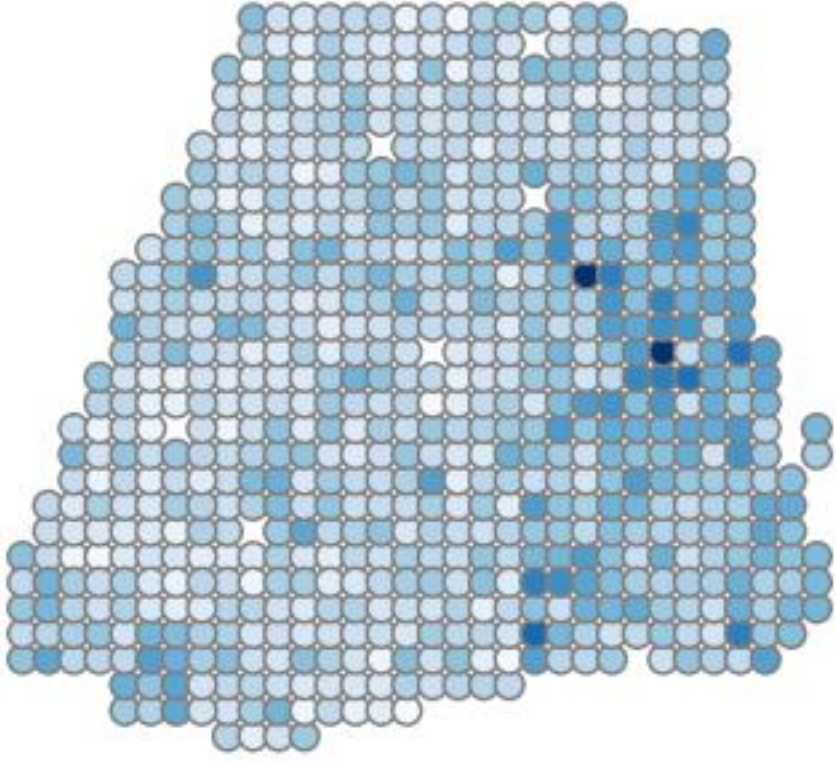

Plasma Cells

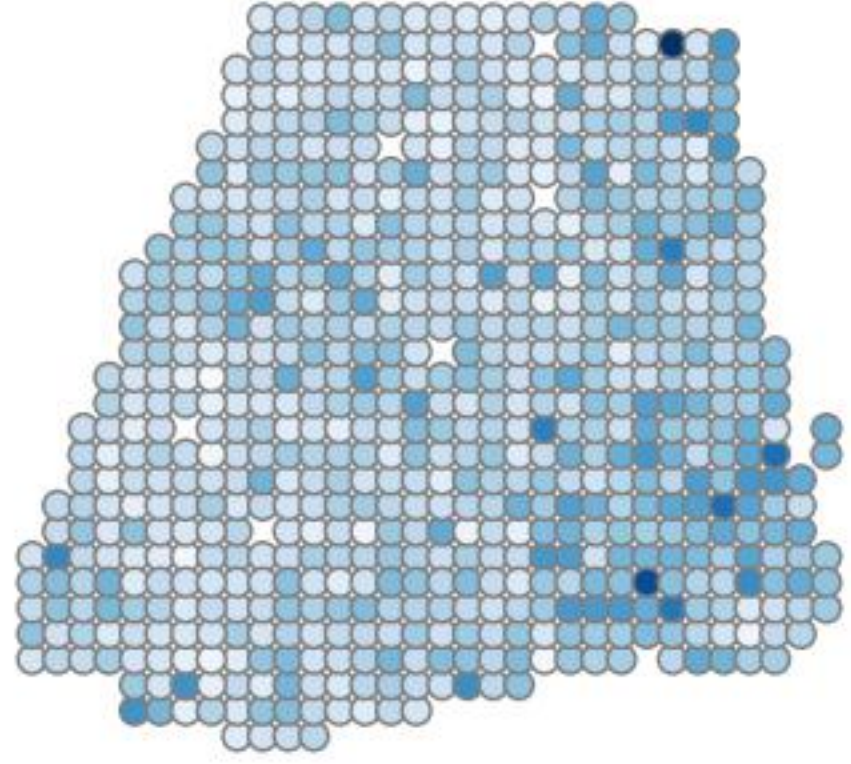

PVL

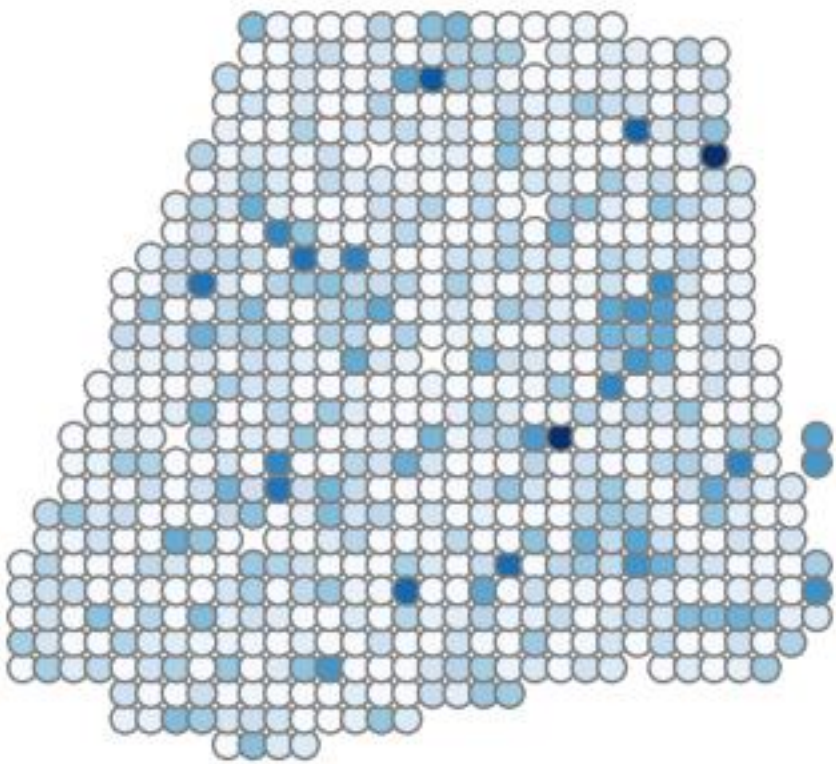

T-cells

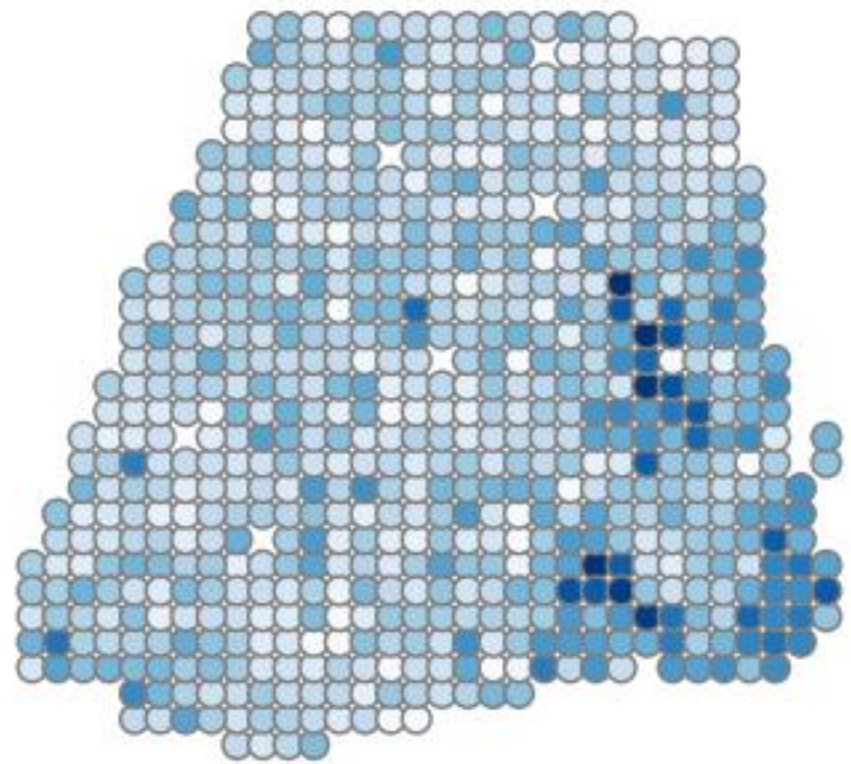

# major\_H2

B-cells

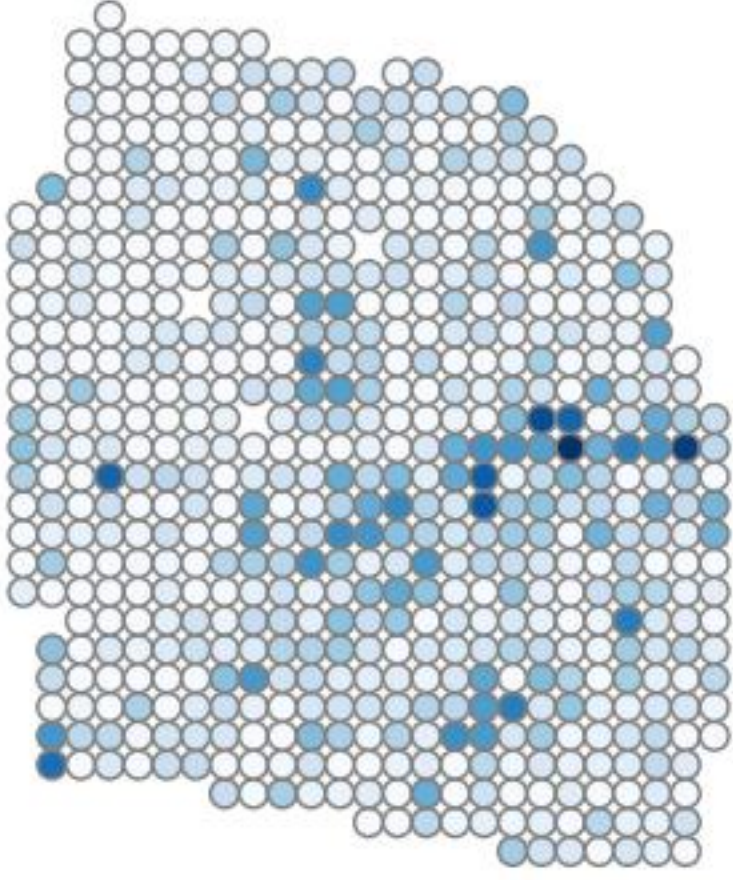

CAFs

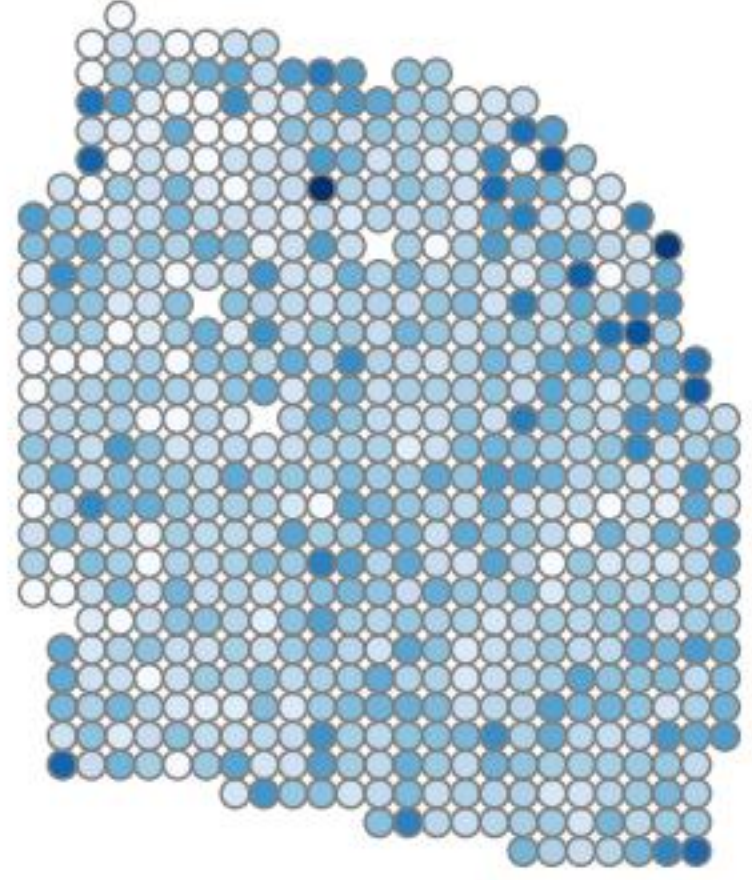

Endothelial

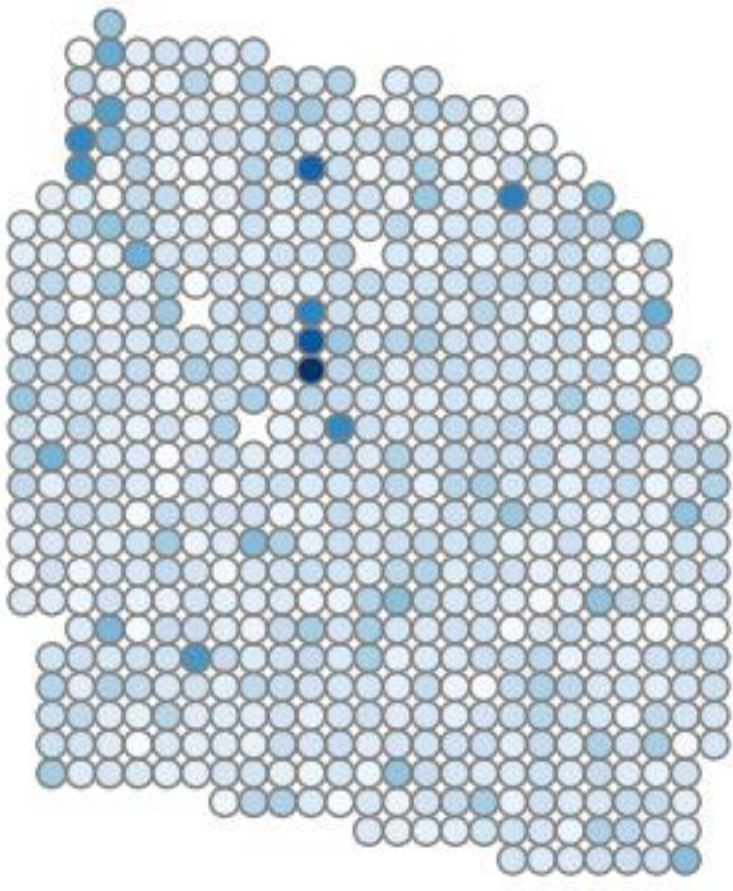

Epithelial

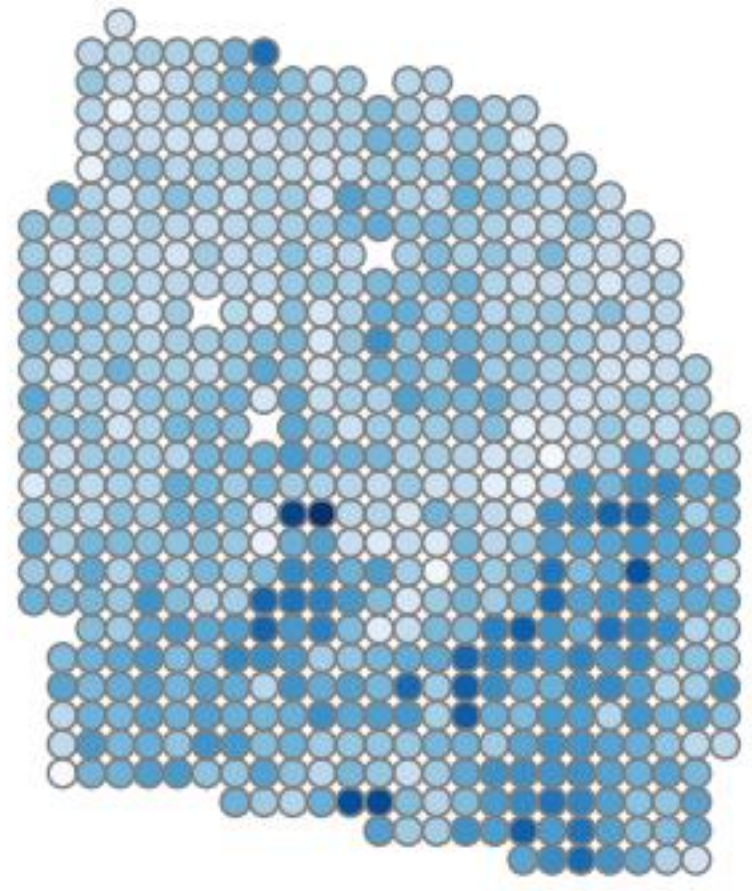

Myeloid

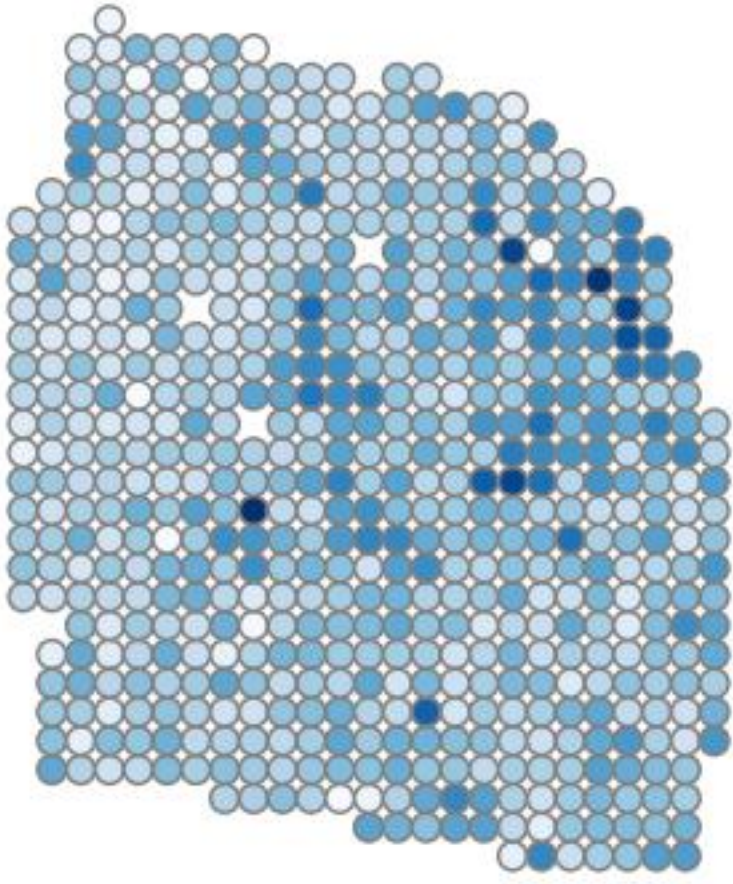

Plasma Cells

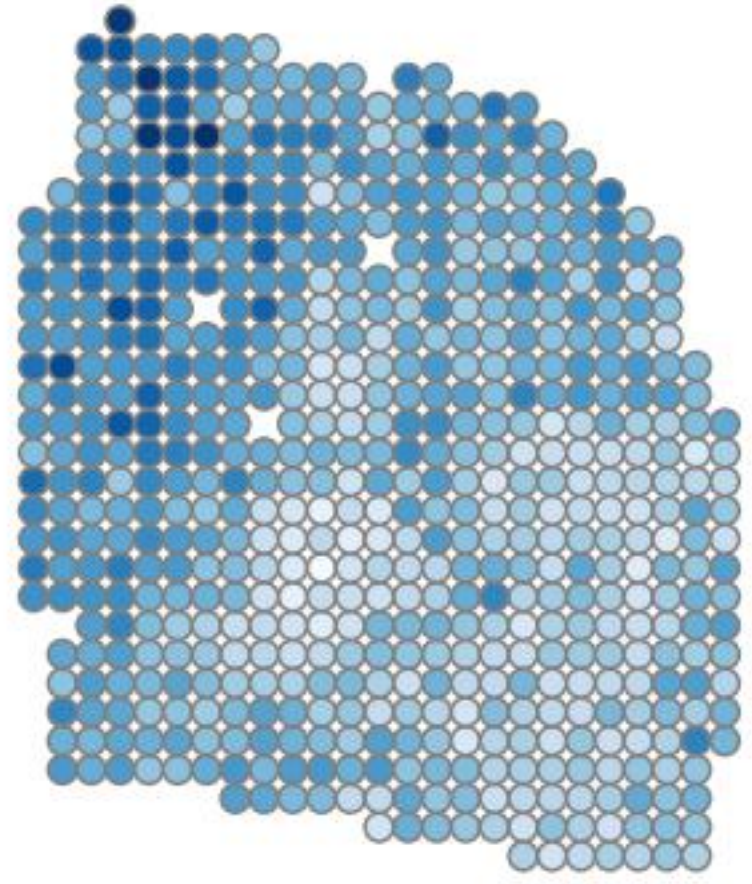

PVL

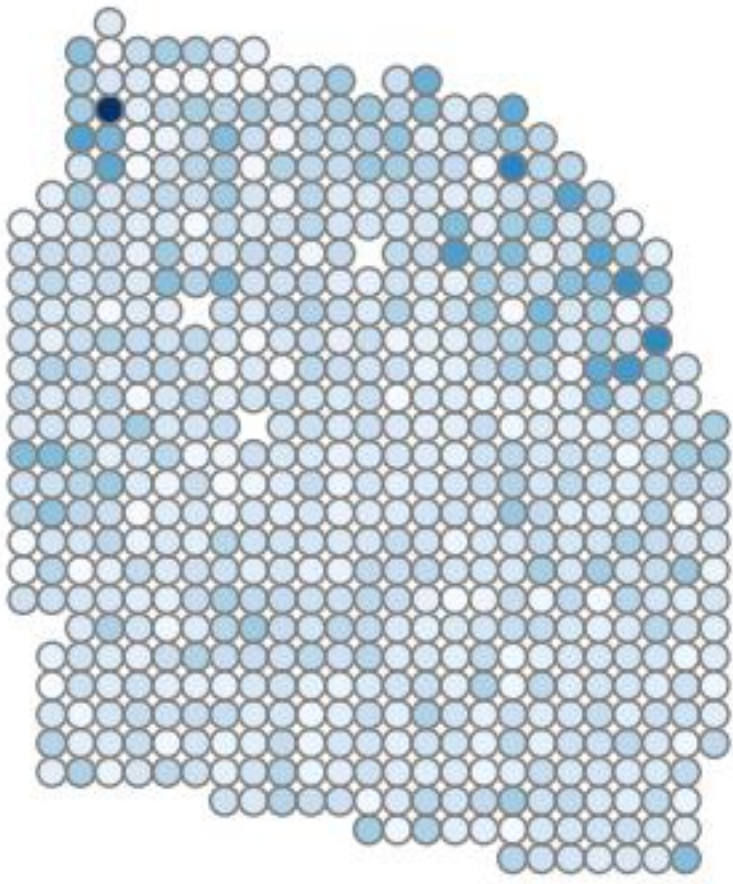

T-cells

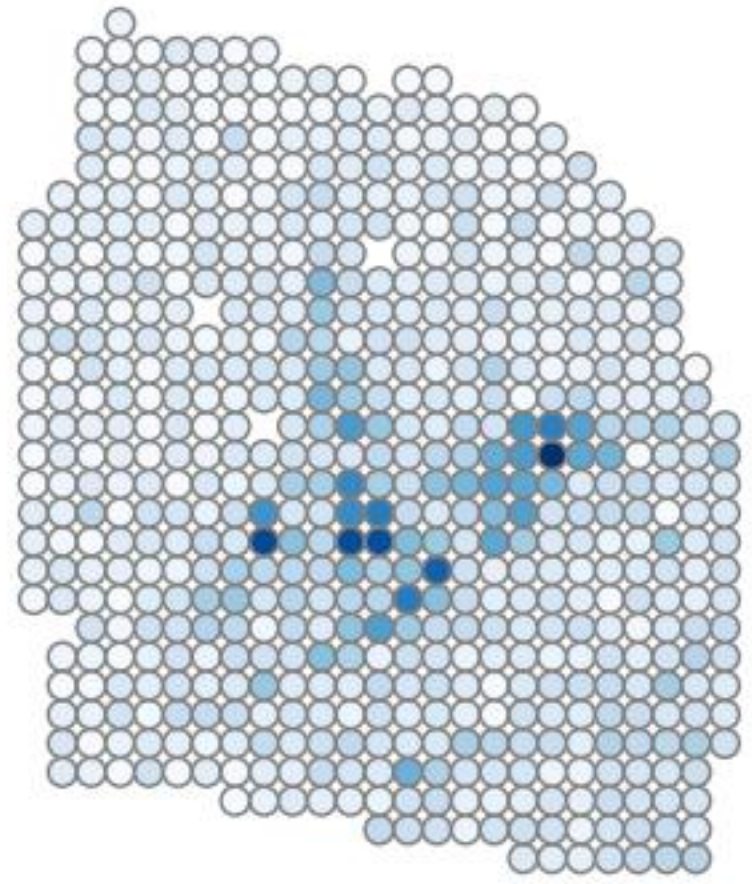

# major\_B1

B-cells

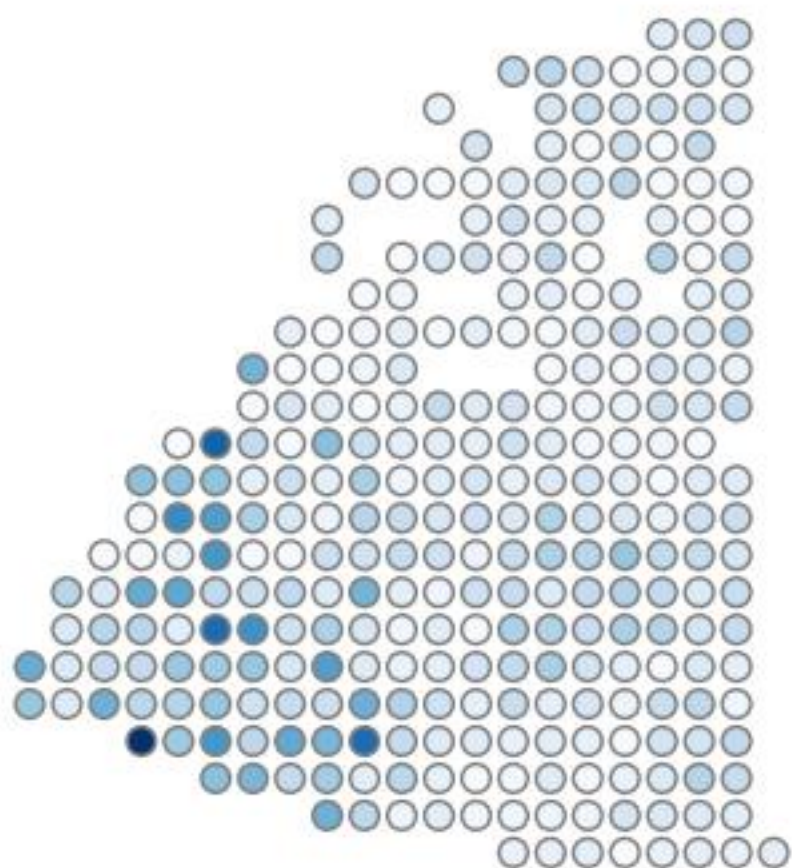

CAFs

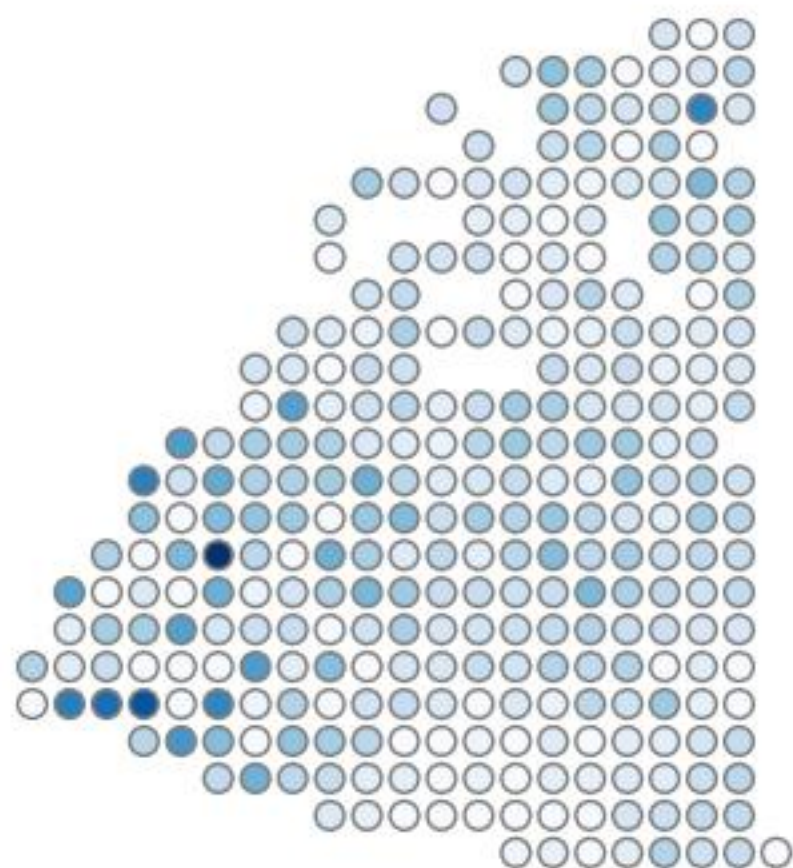

Endothelial

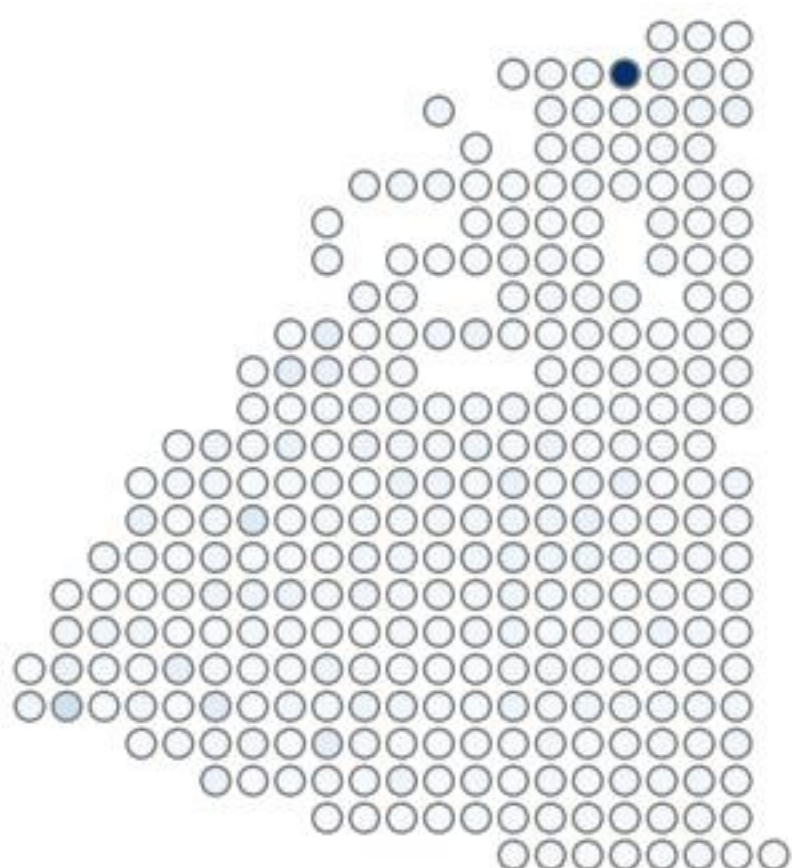

Epithelial

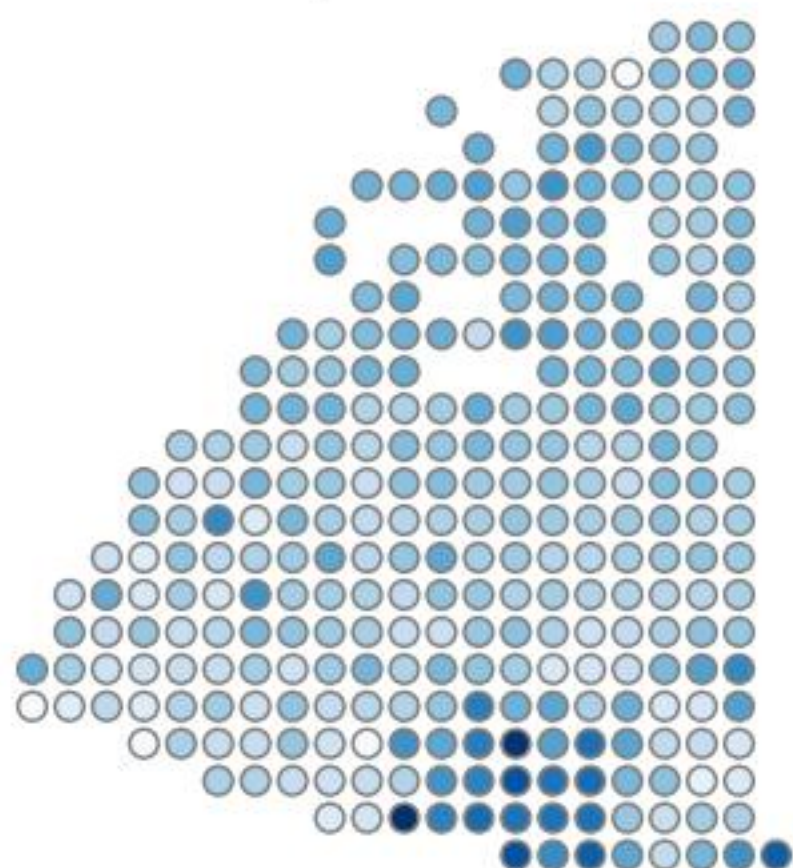

Myeloid

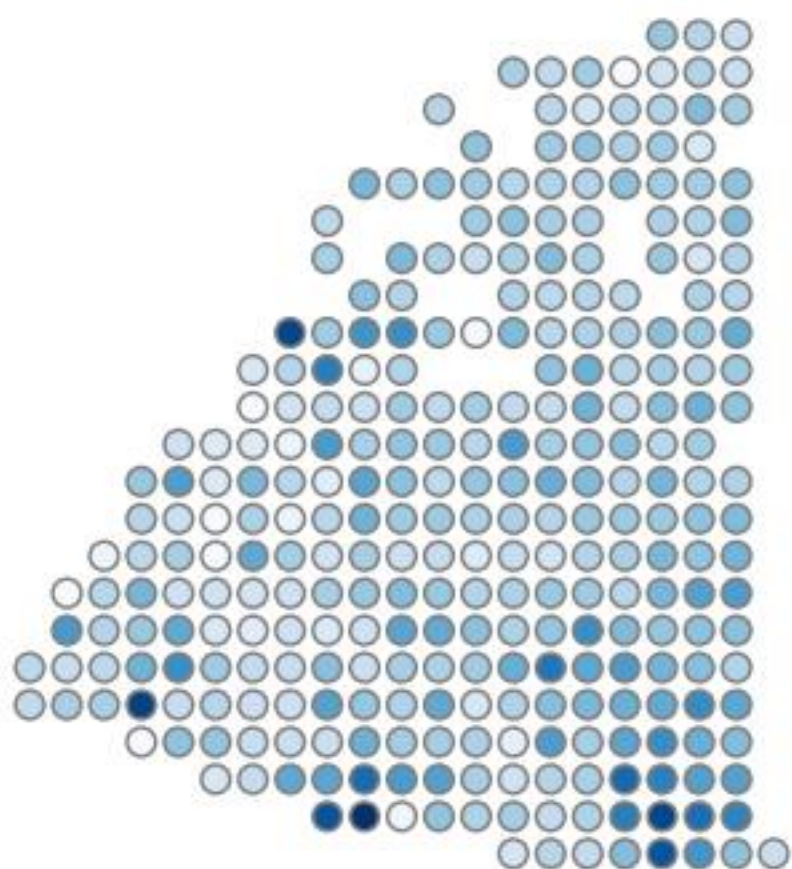

Plasma Cells

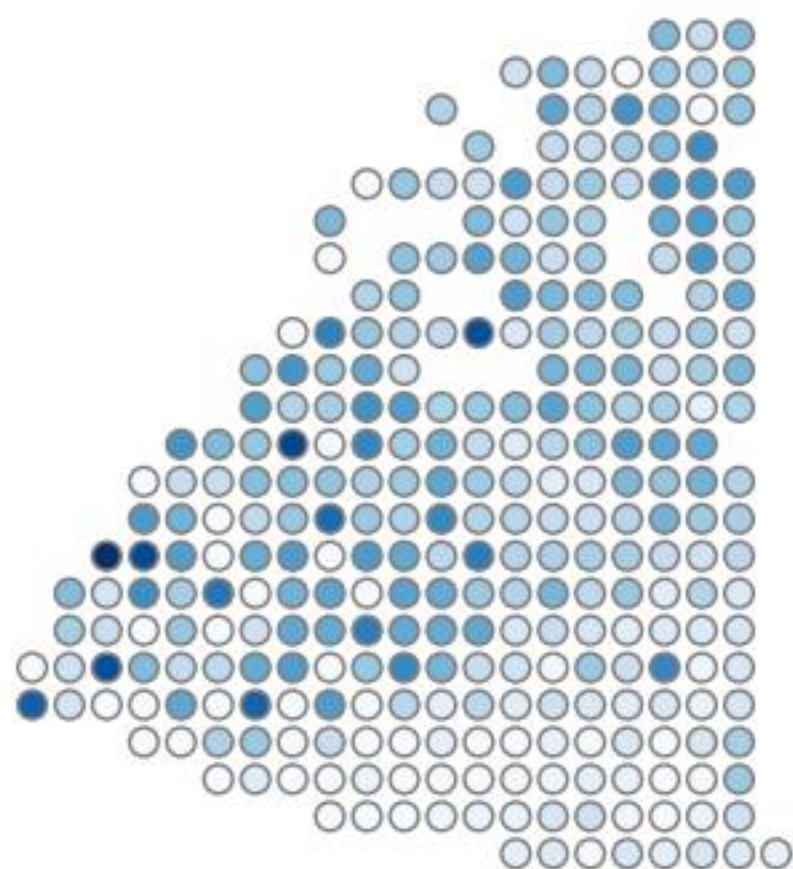

PVL

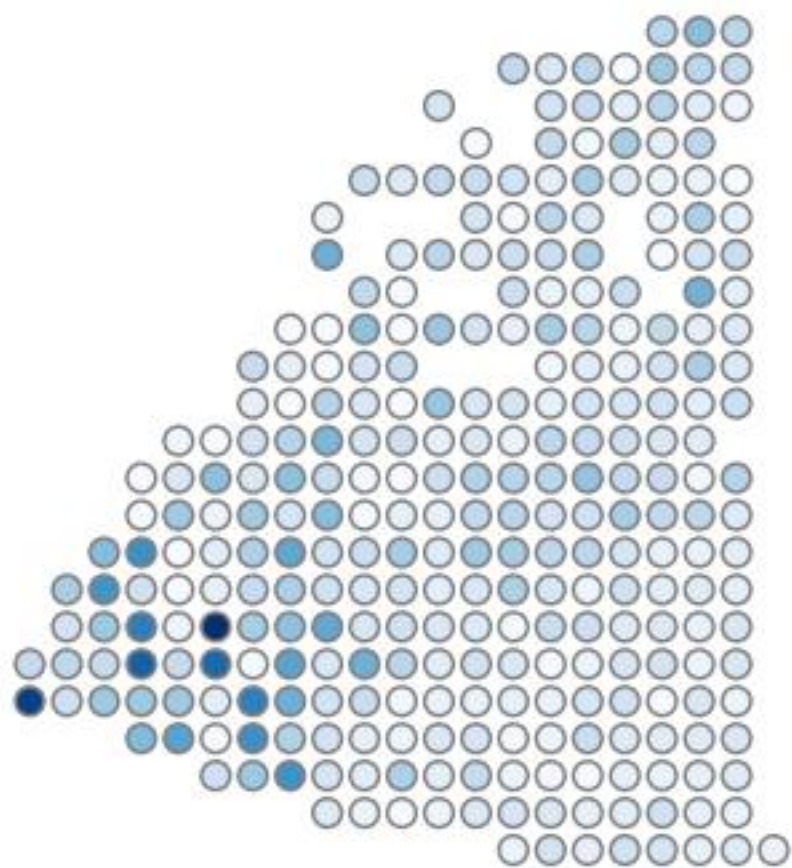

T-cells

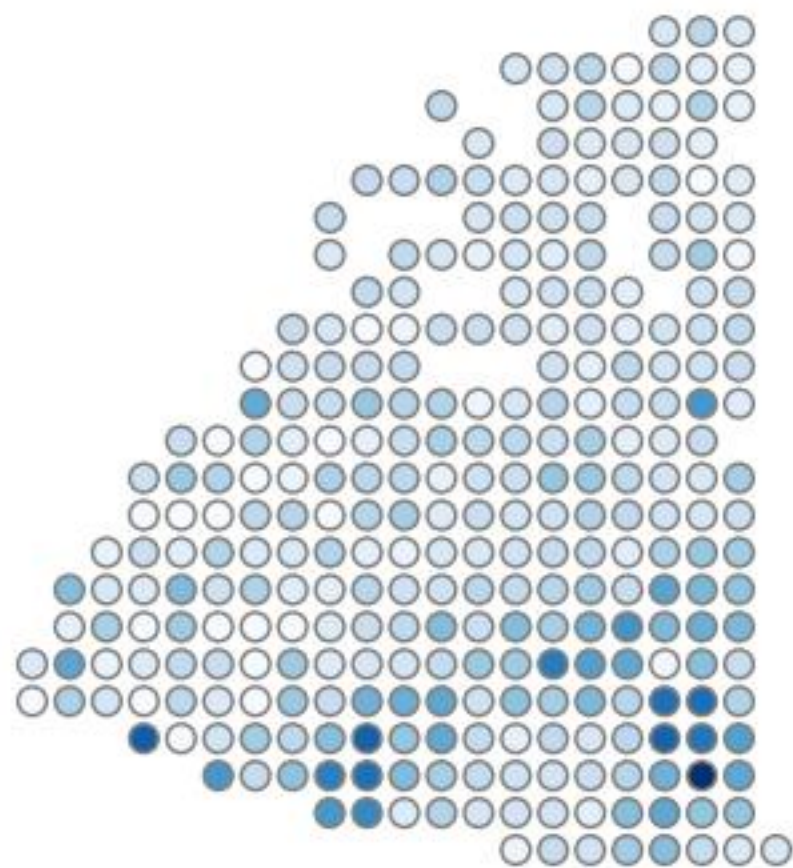

# major\_D5

B-cells

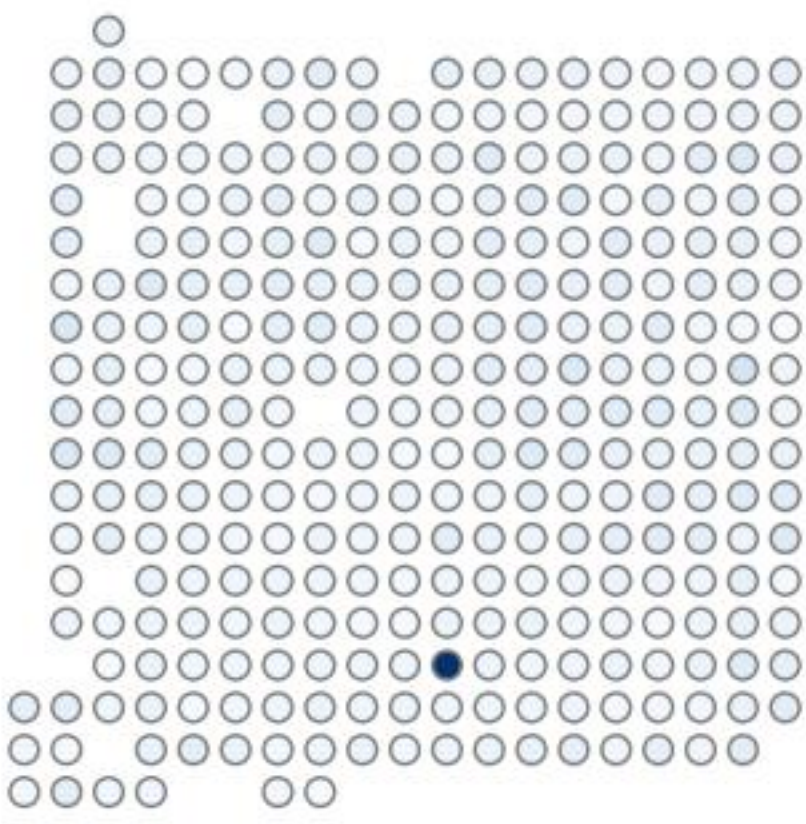

CAFs

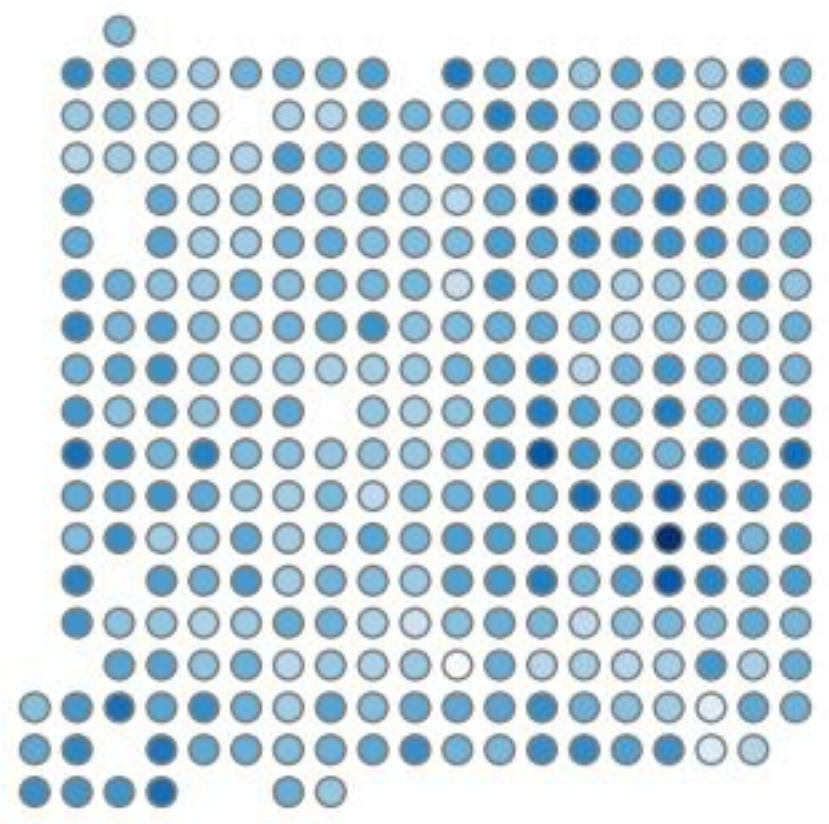

Endothelial

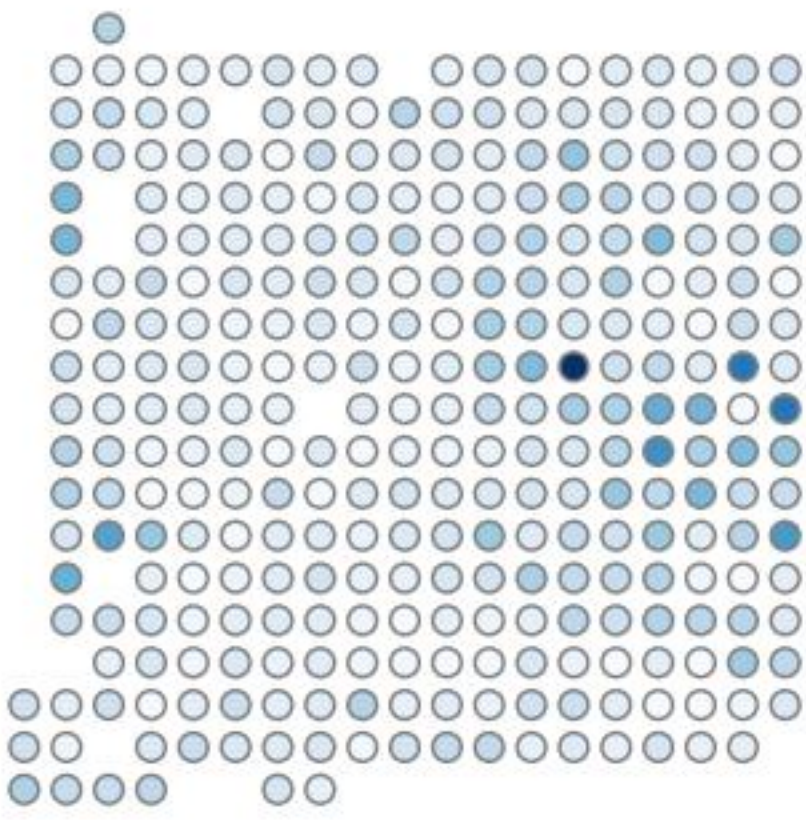

Epithelial

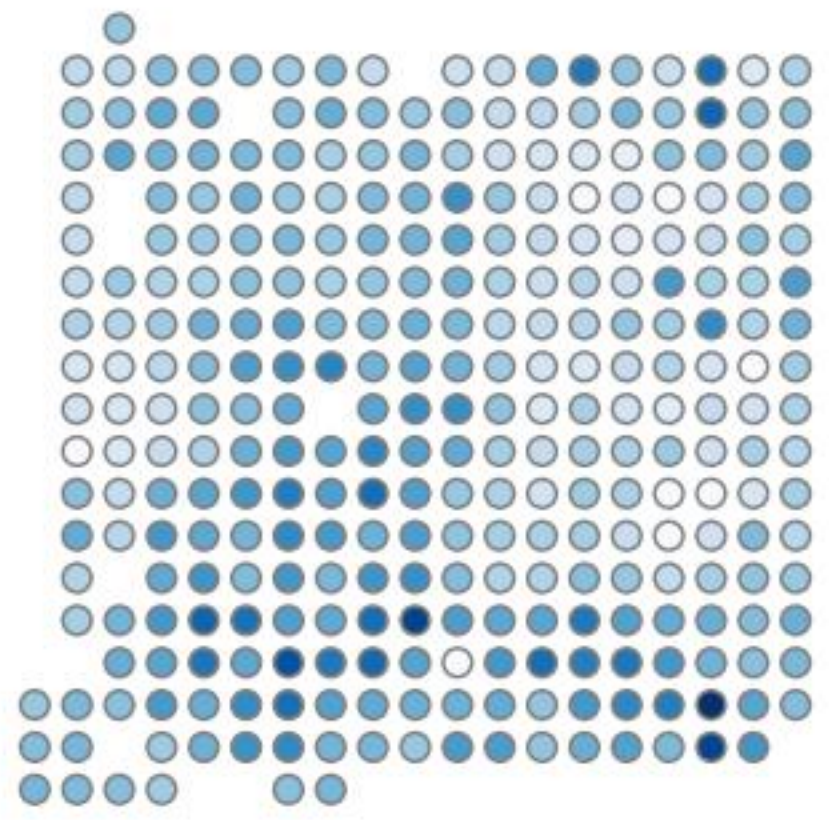

Myeloid

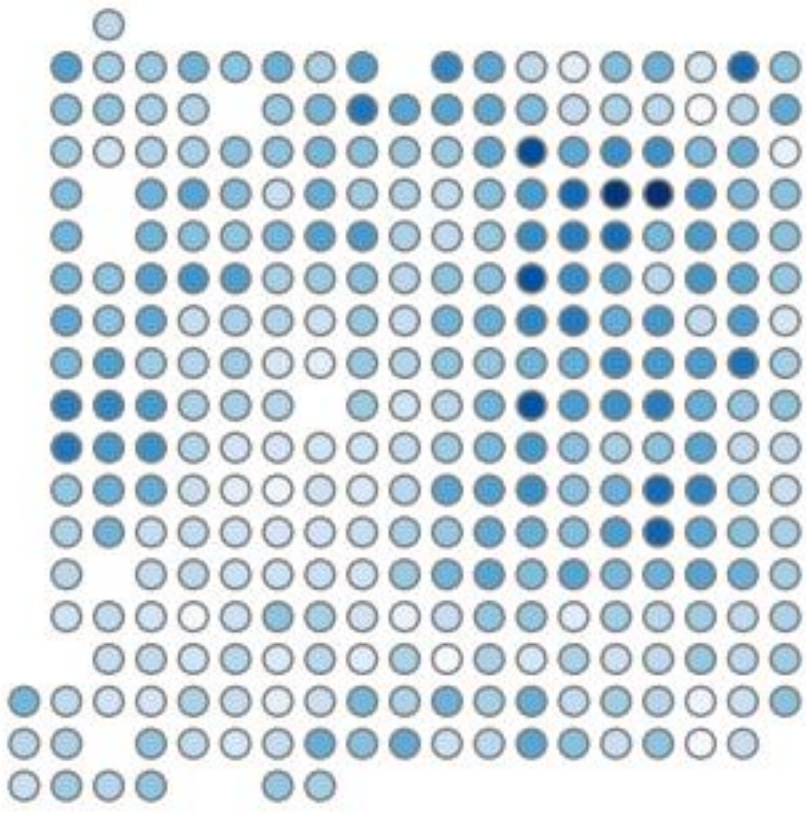

Plasma Cells

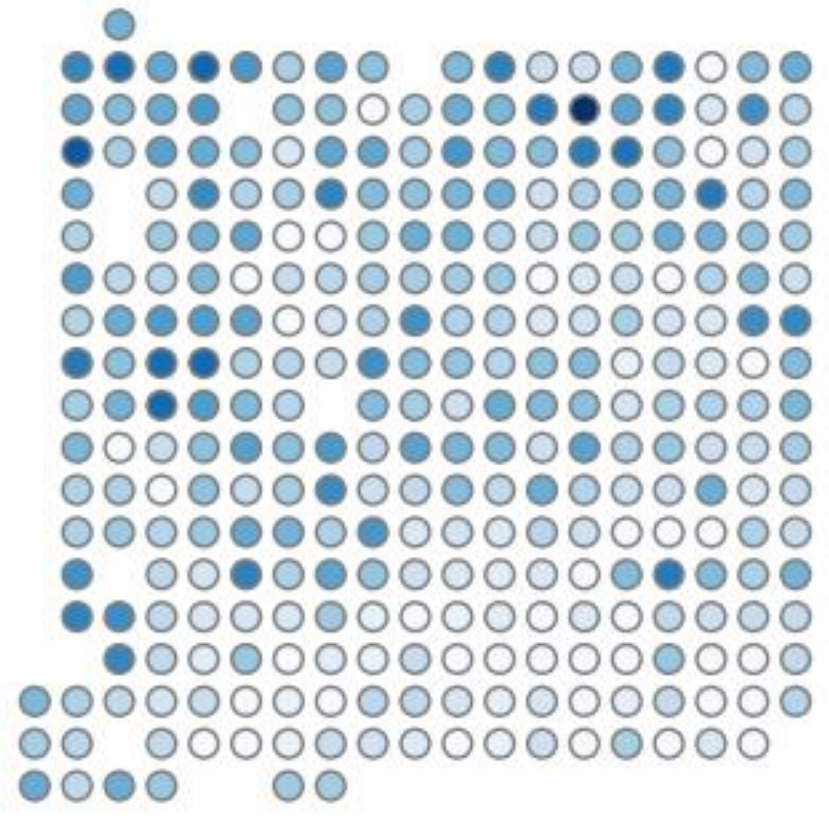

PVL

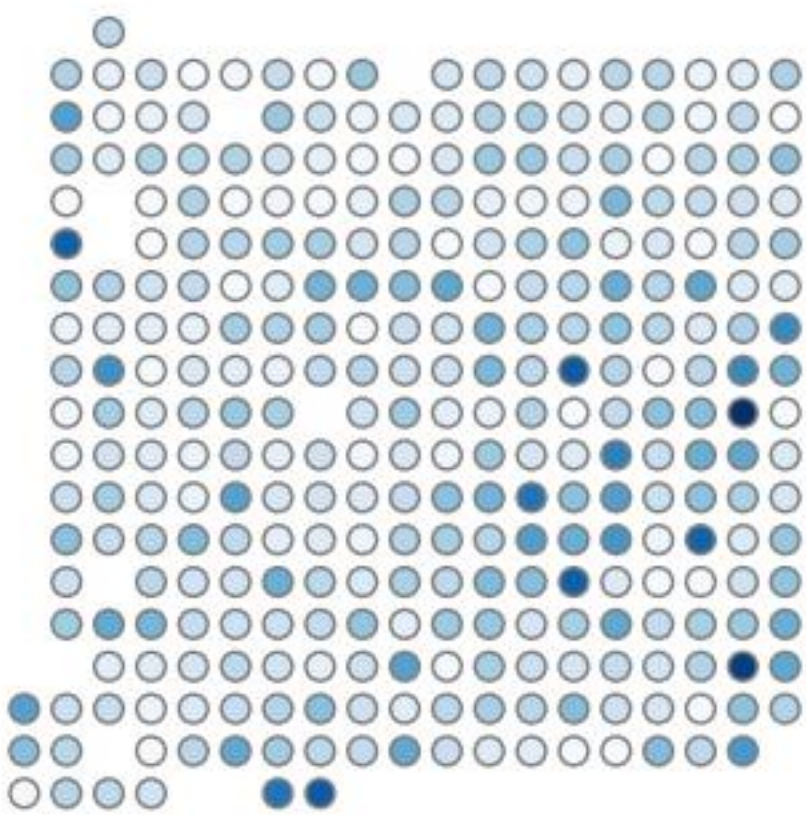

T-cells

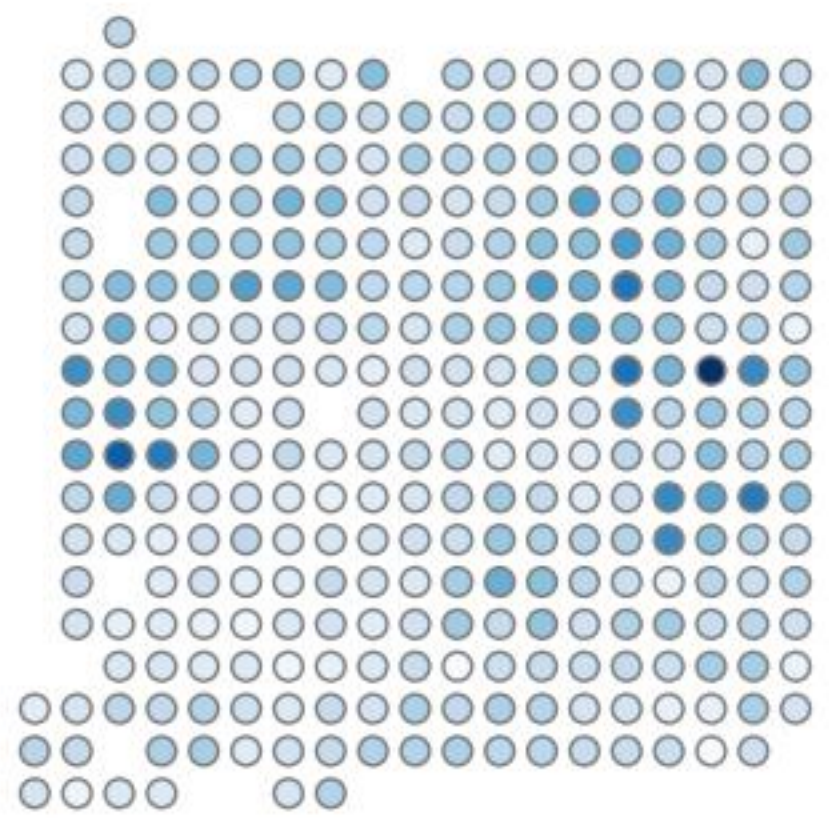

# major\_B5

B-cells

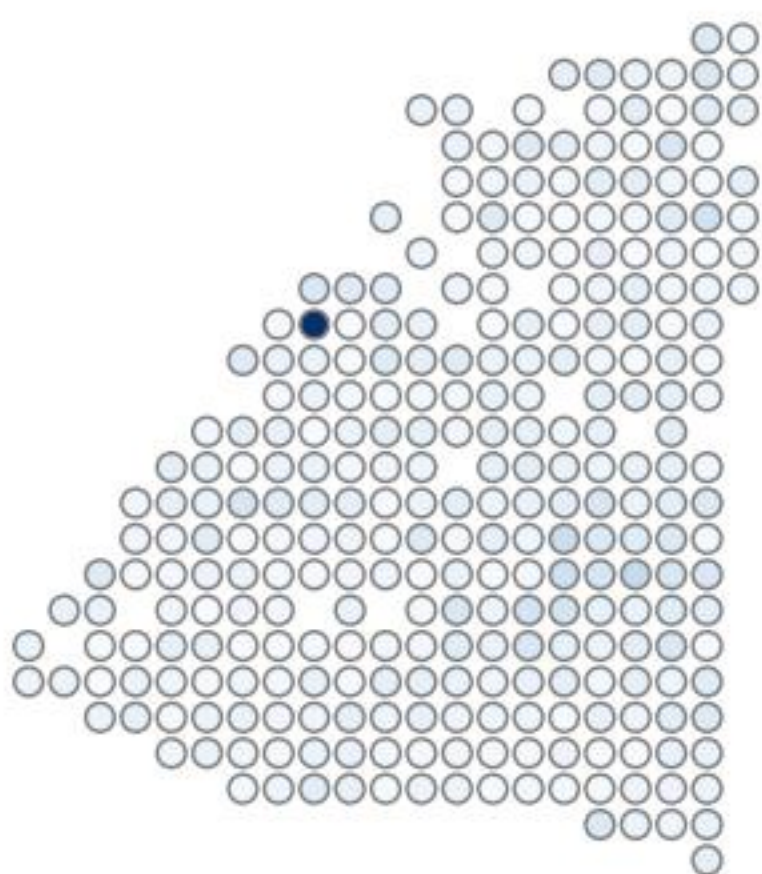

CAFs

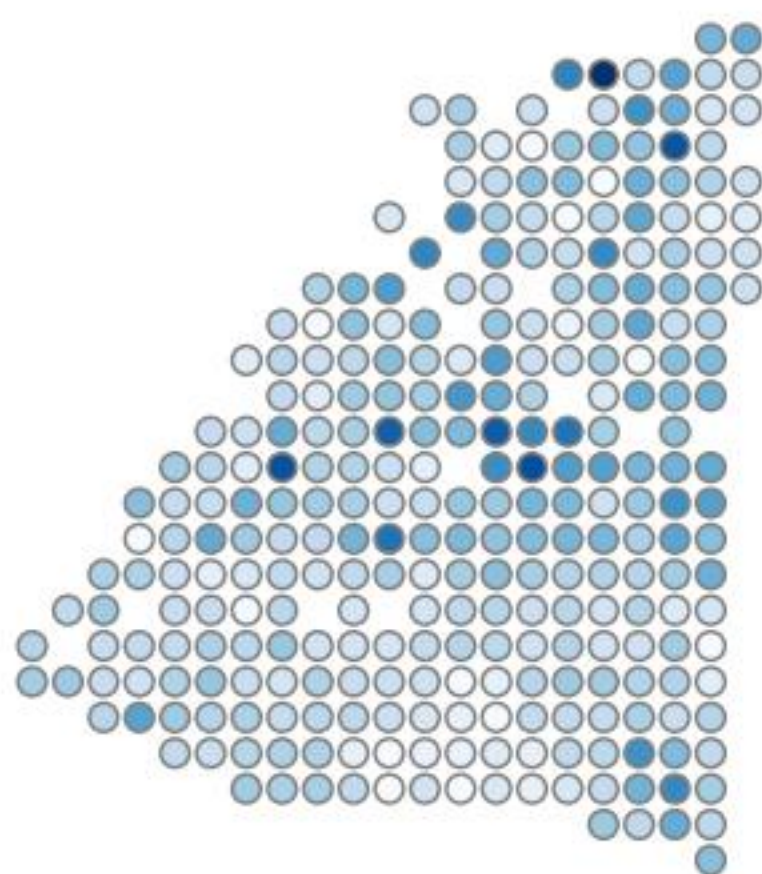

Endothelial

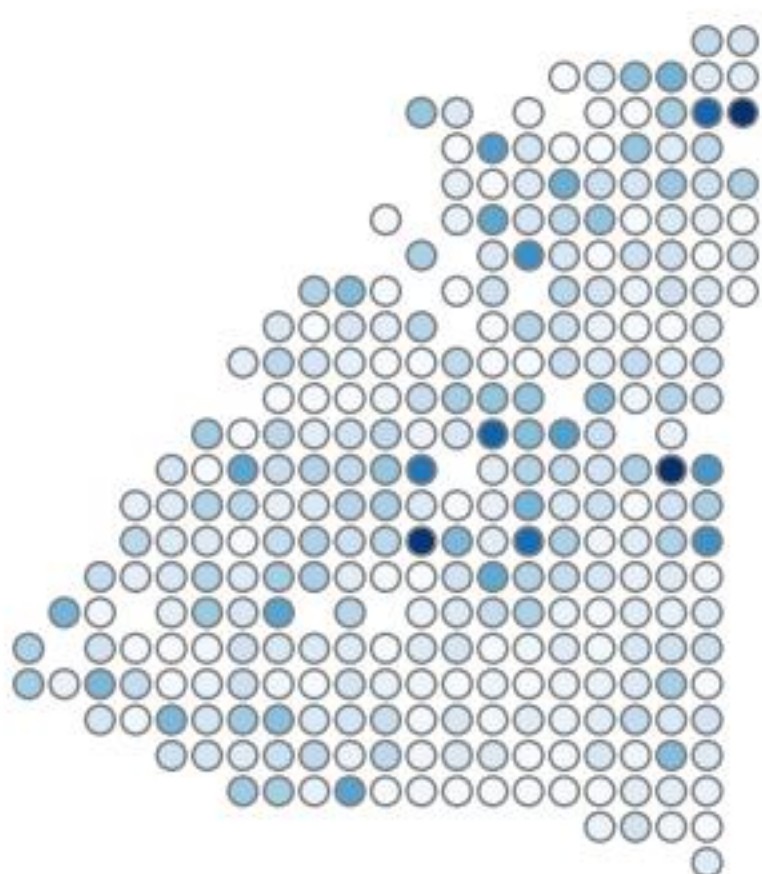

Epithelial

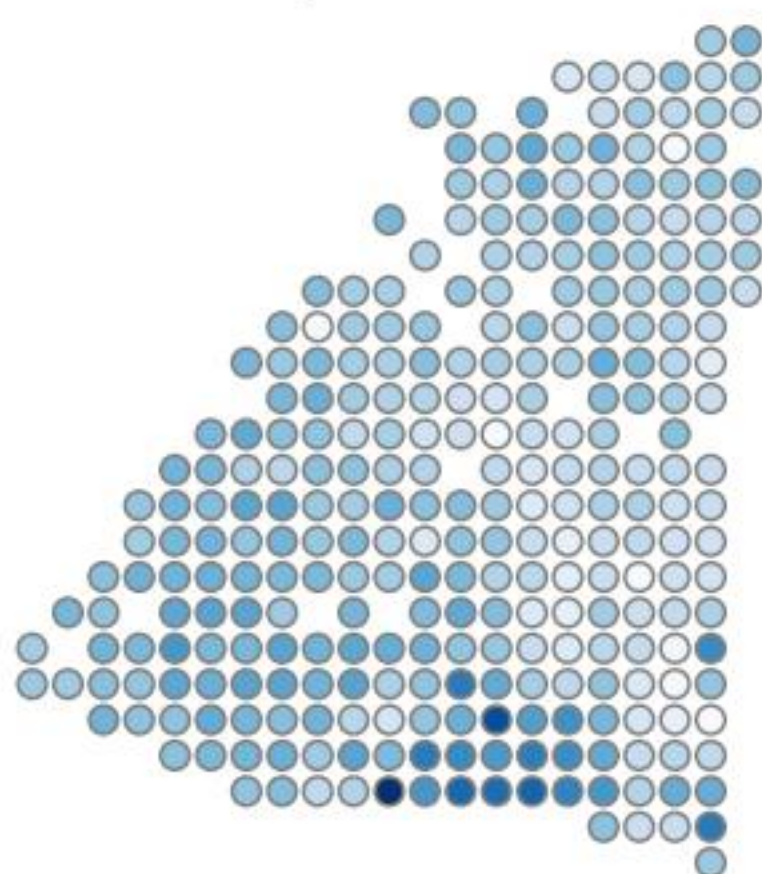

Myeloid

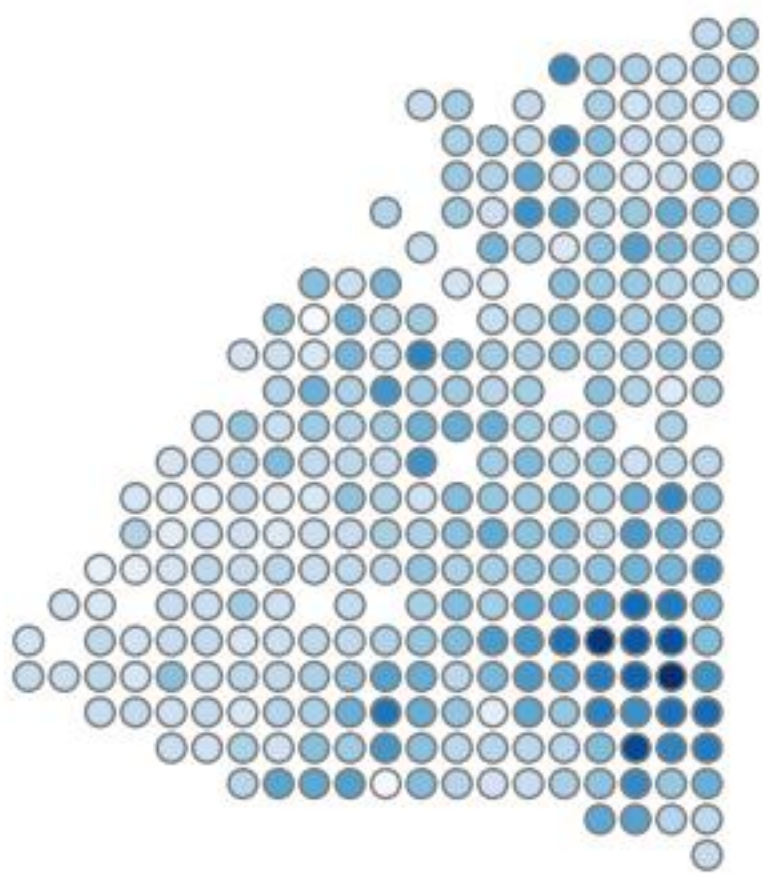

Plasma Cells

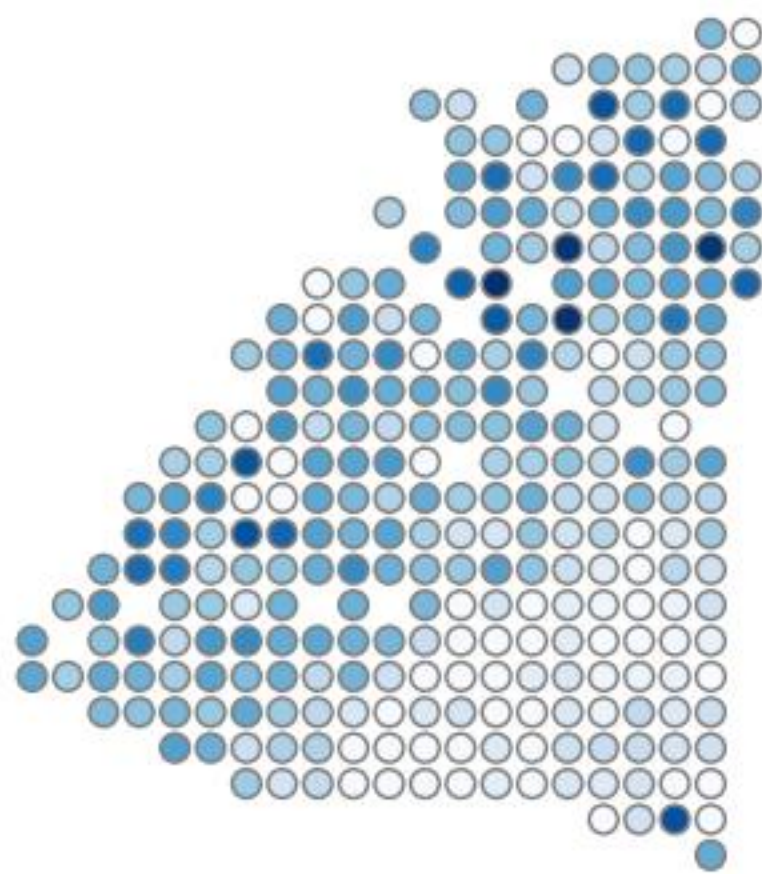

PVL

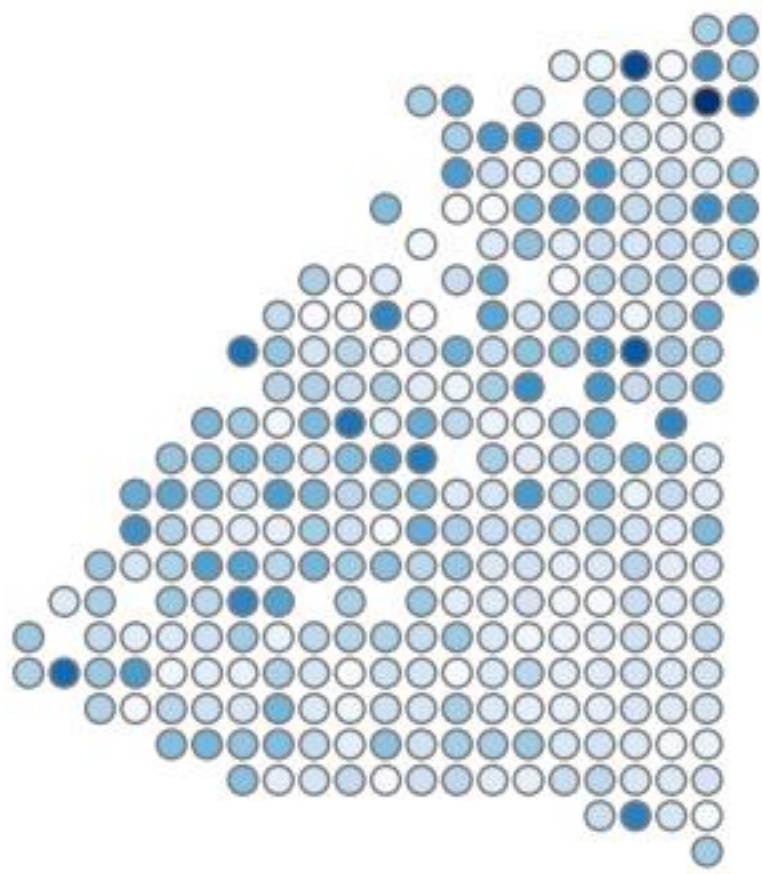

T-cells

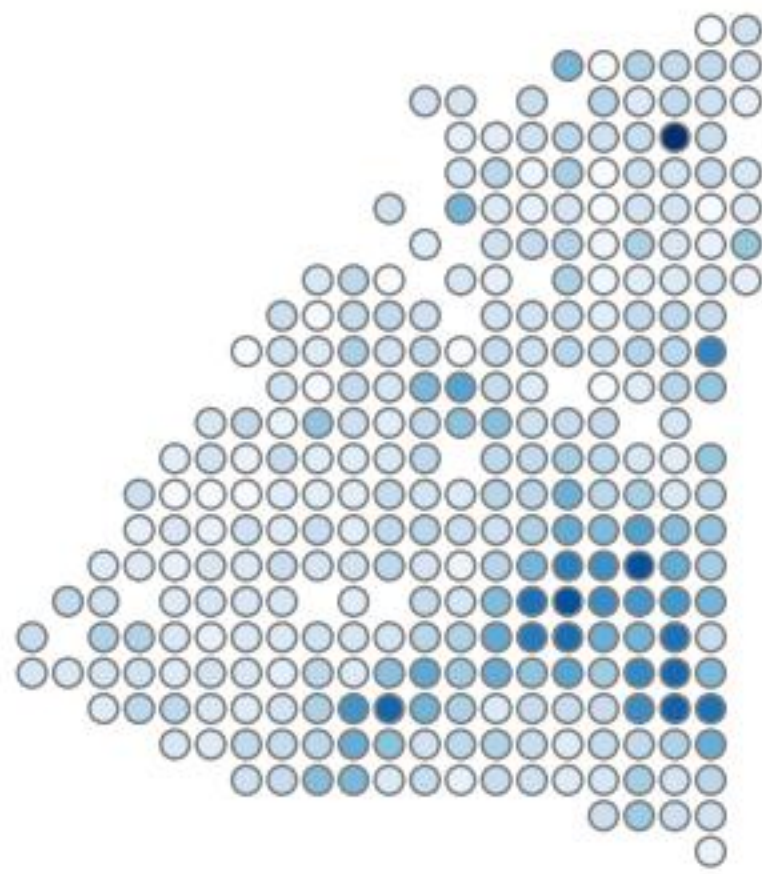

# major\_B6

B-cells

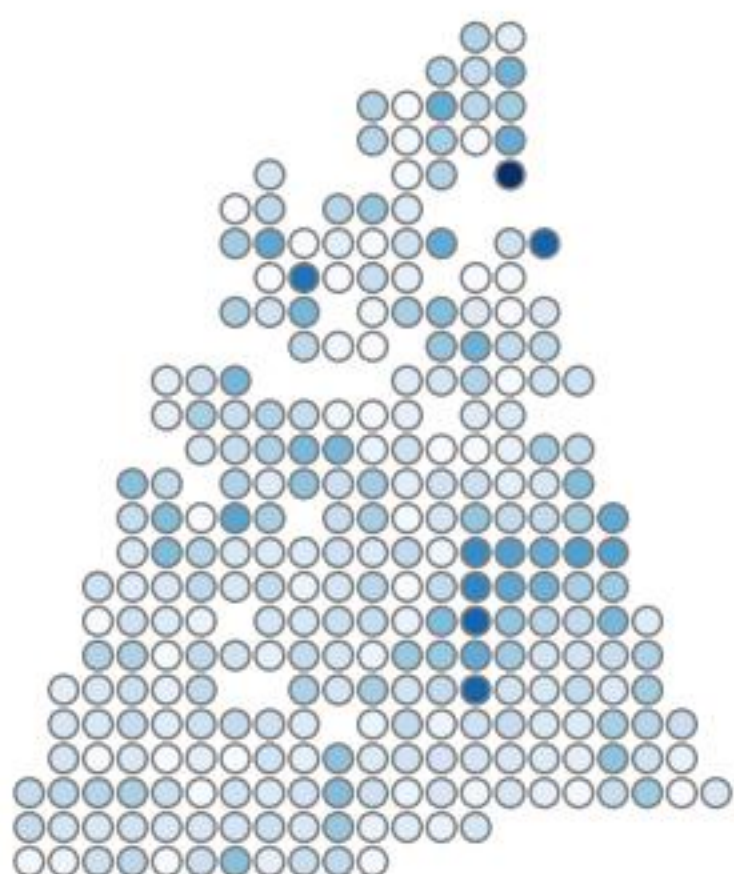

CAFs

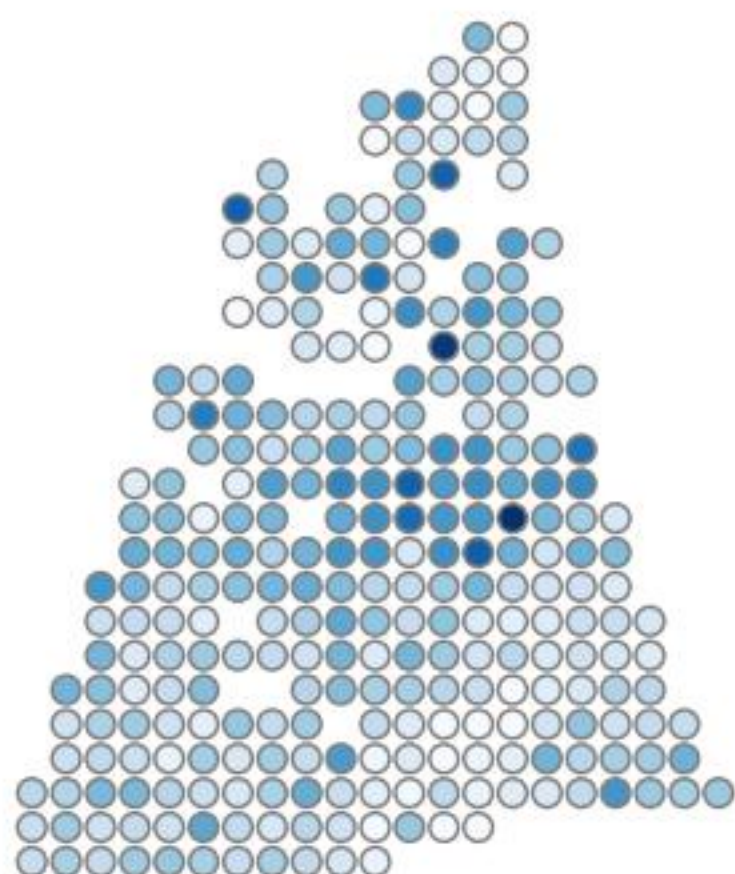

Endothelial

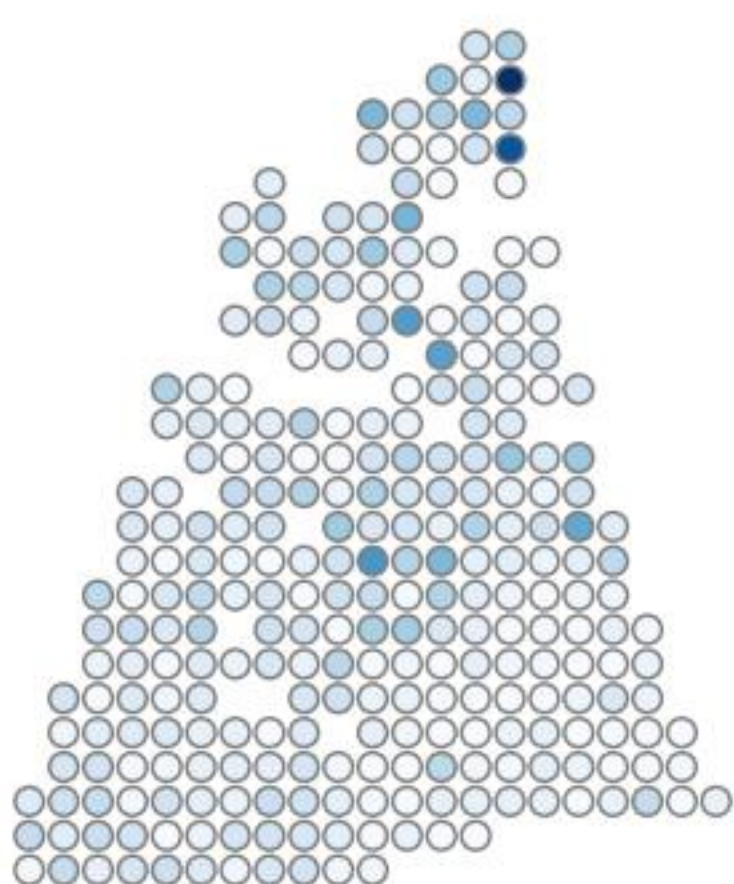

Epithelial

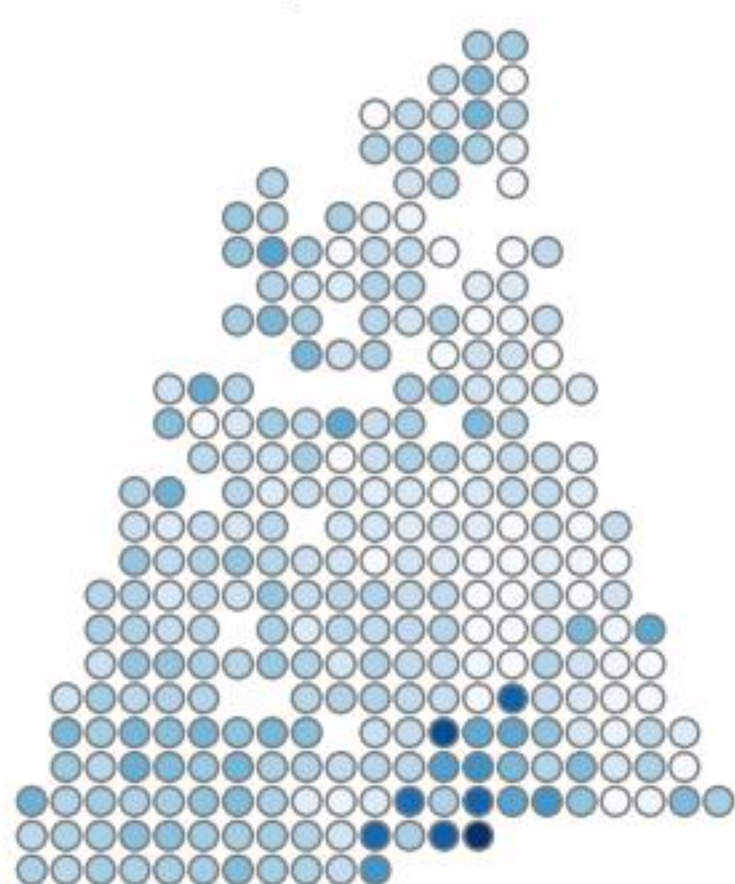

Myeloid

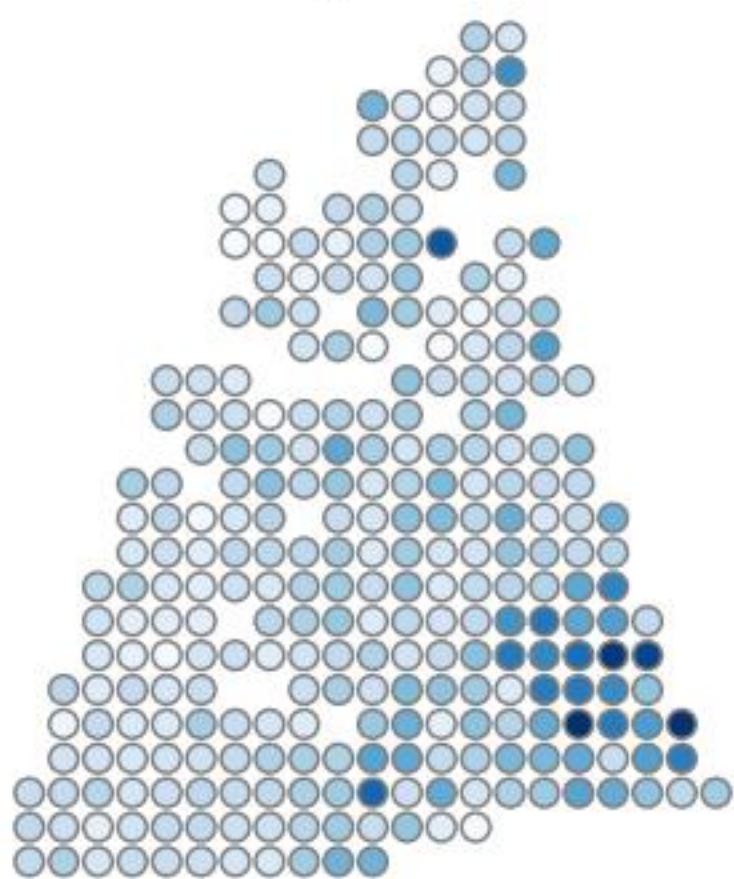

Plasma Cells

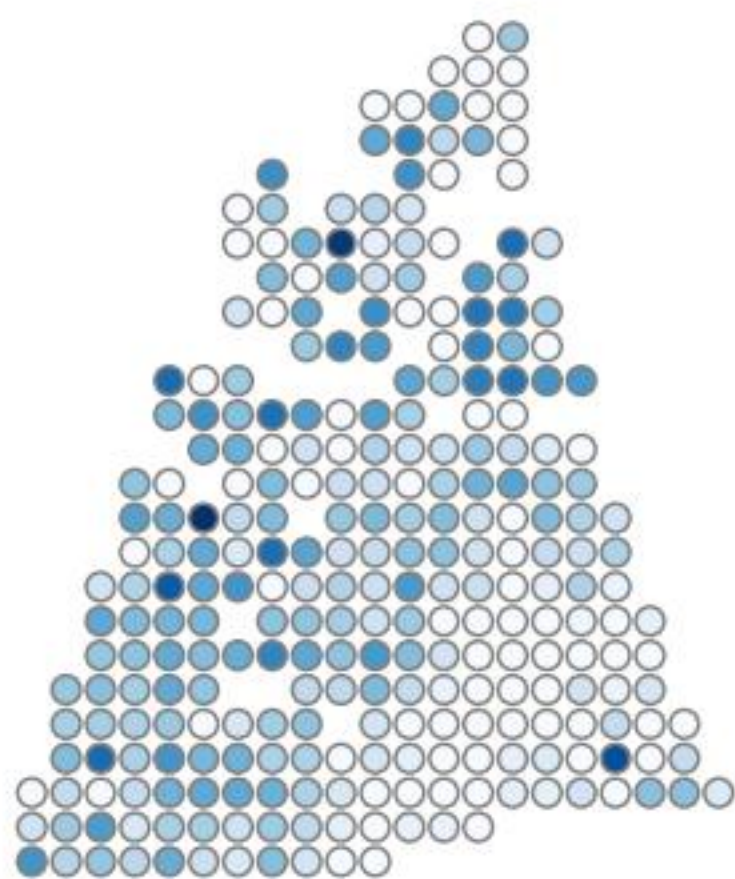

PVL

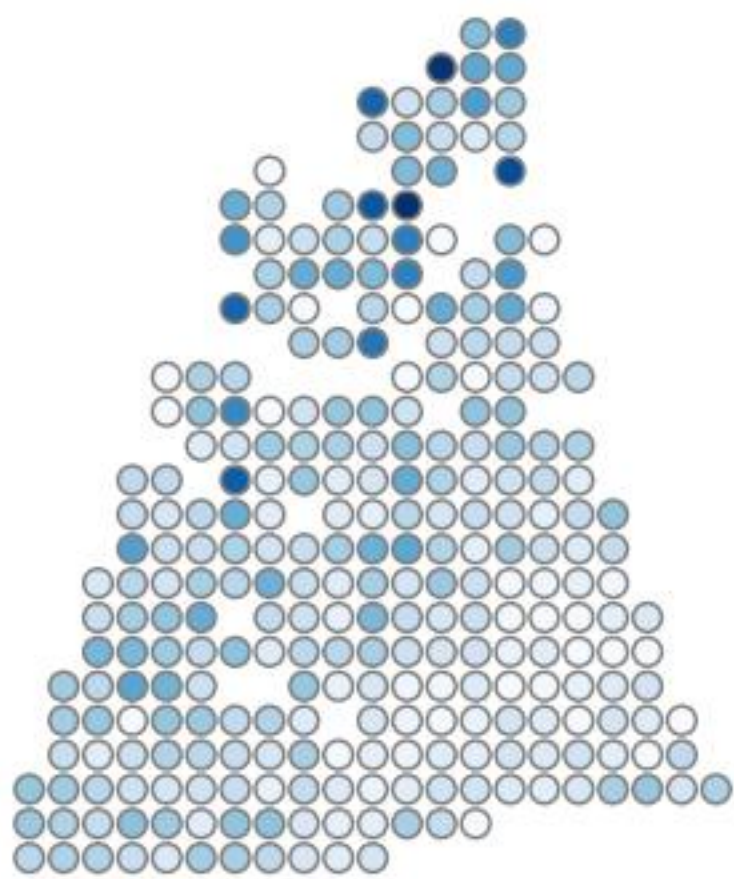

T-cells

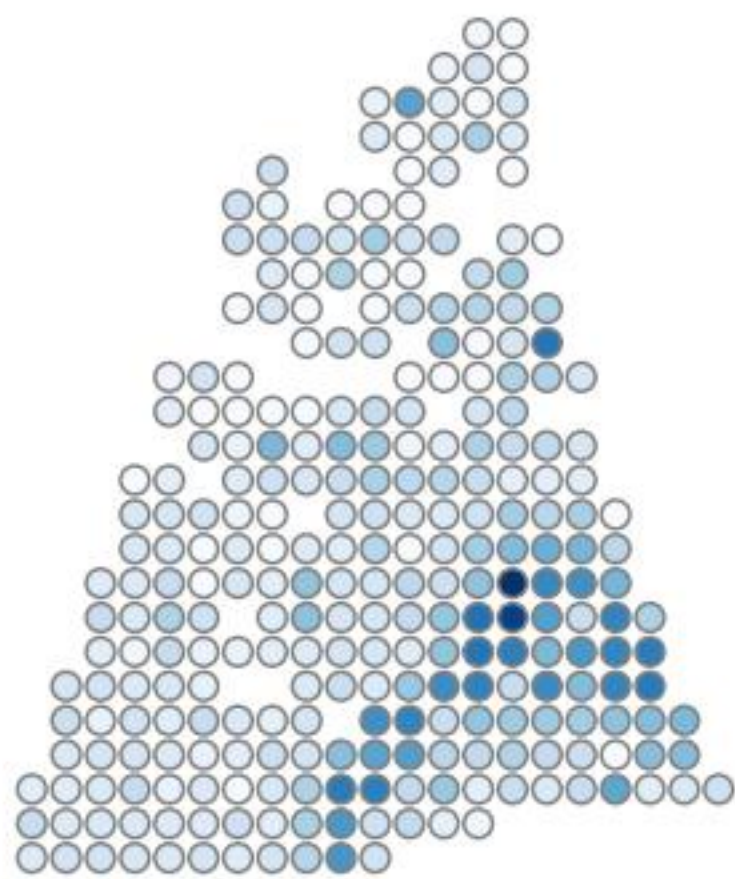

# major\_A2

B-cells

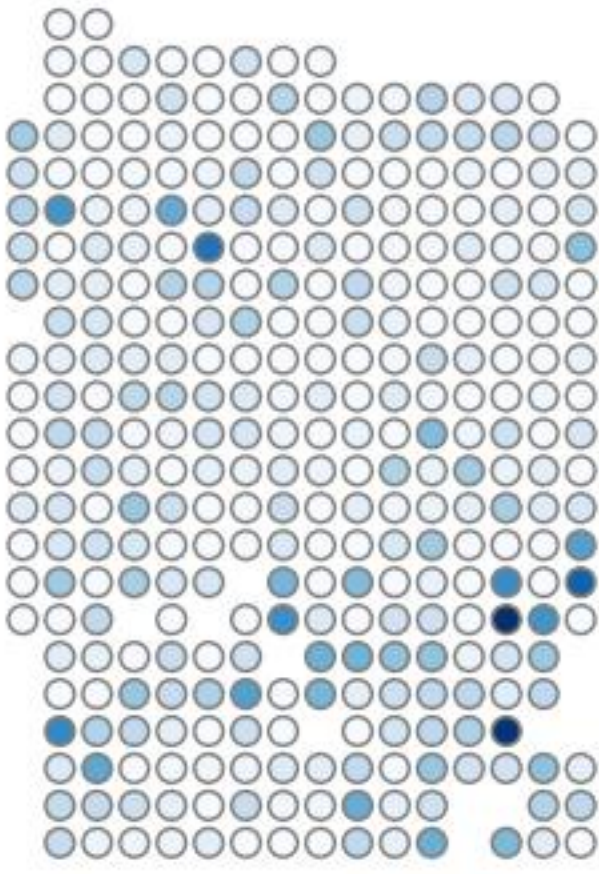

CAFs

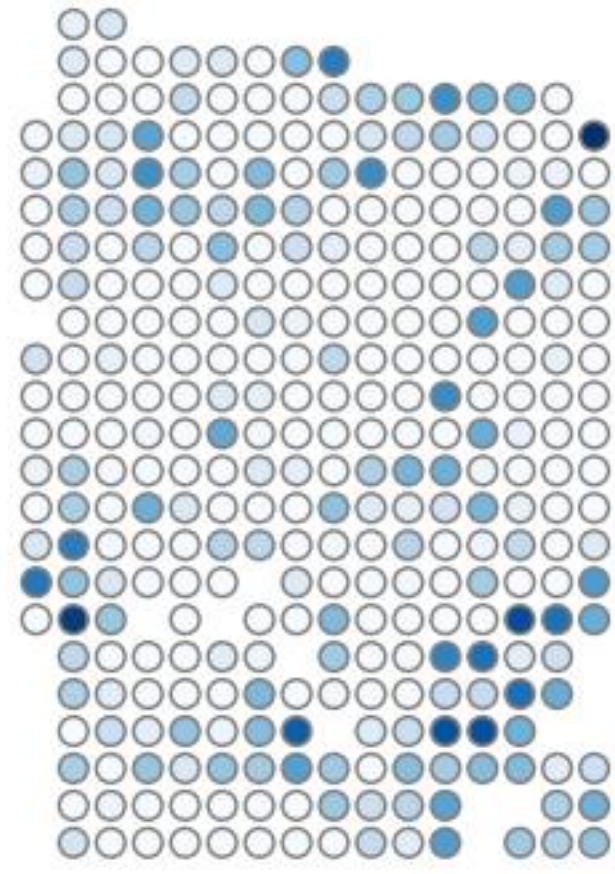

Endothelial

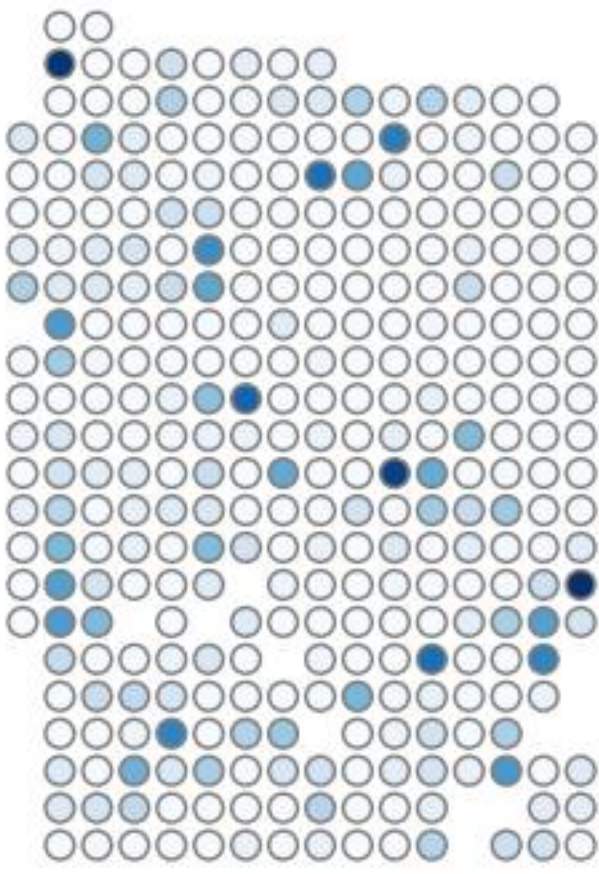

Epithelial

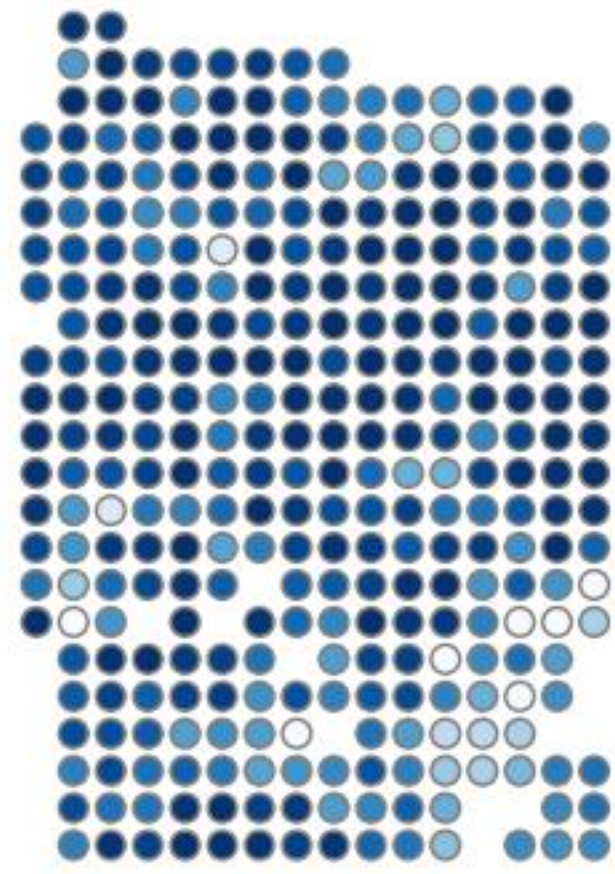

Myeloid

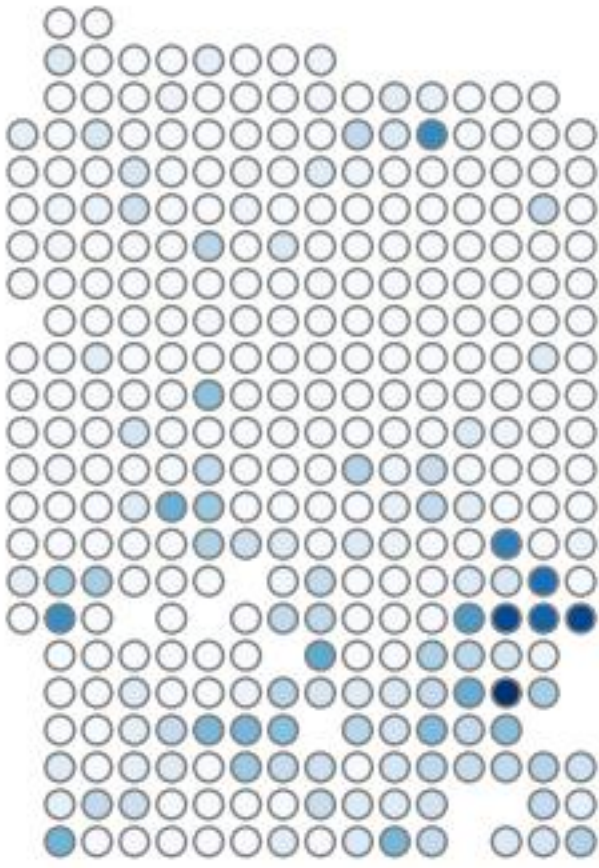

Plasma Cells

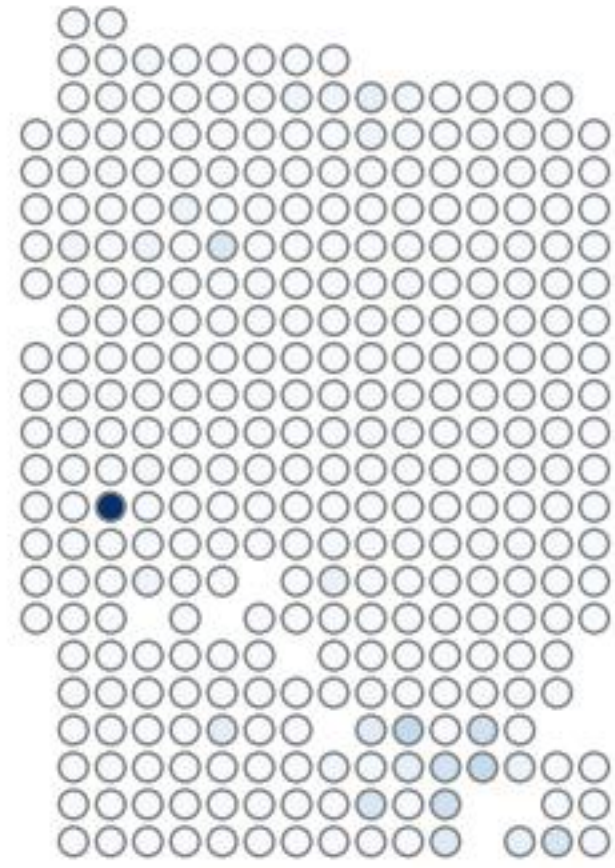

PVL

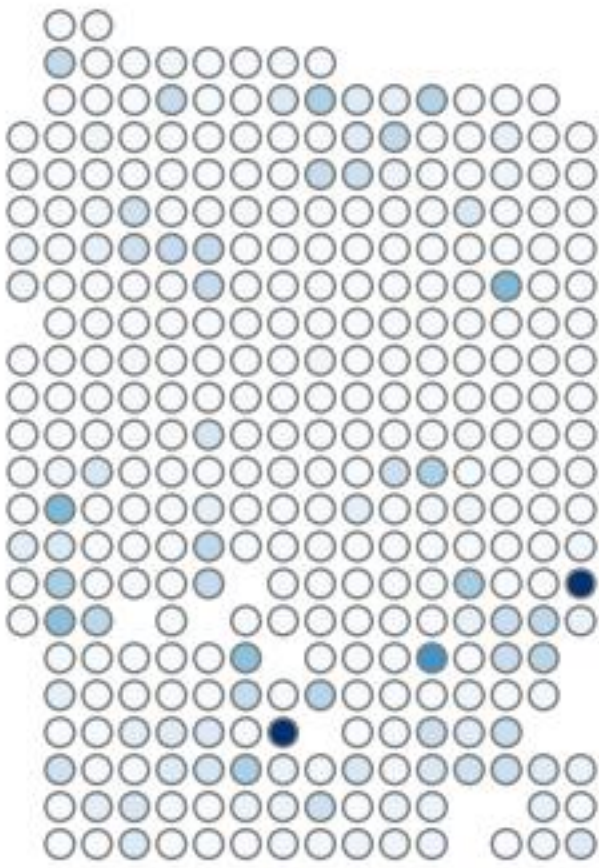

T-cells

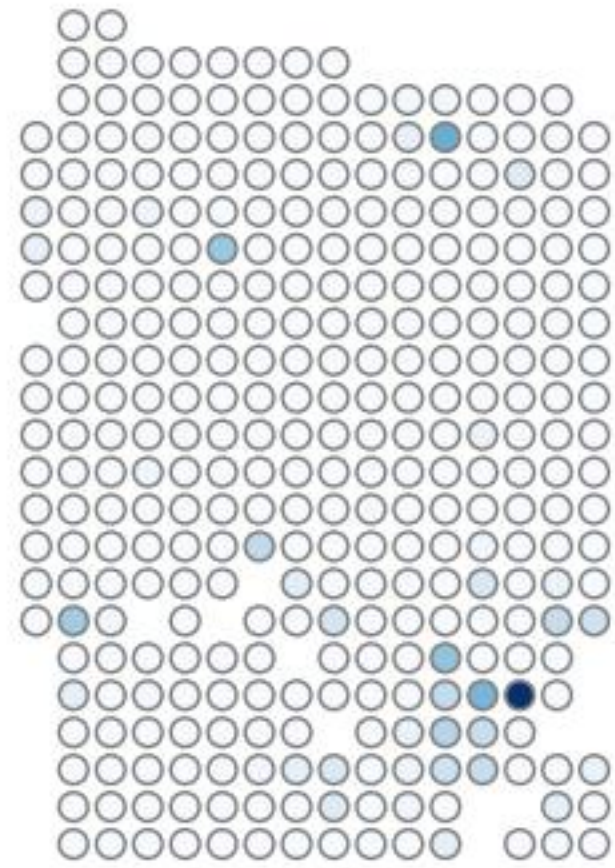

# major\_D1

B-cells

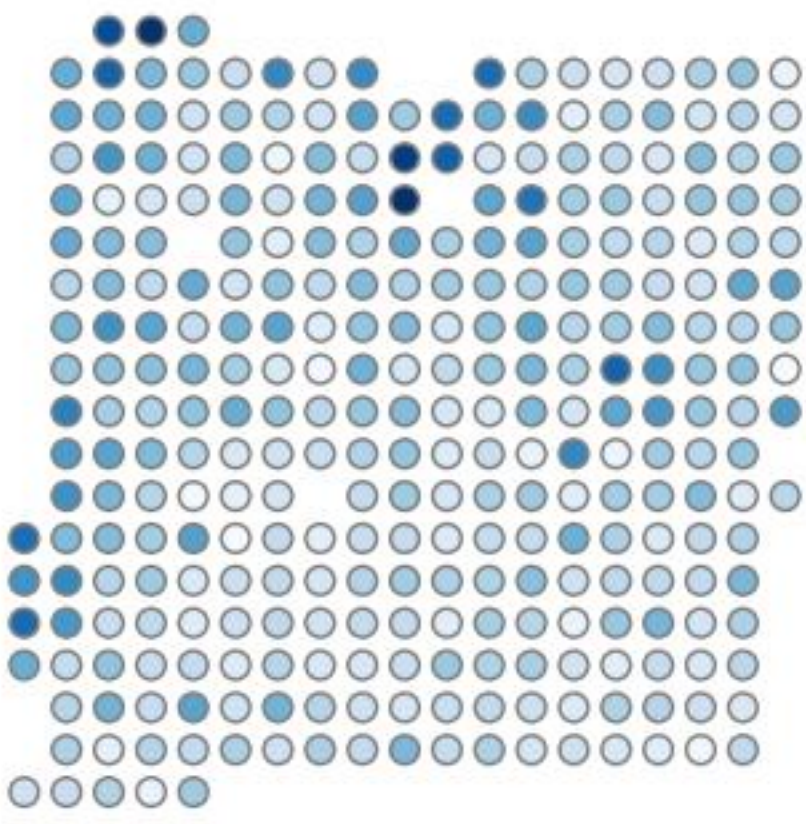

CAFs

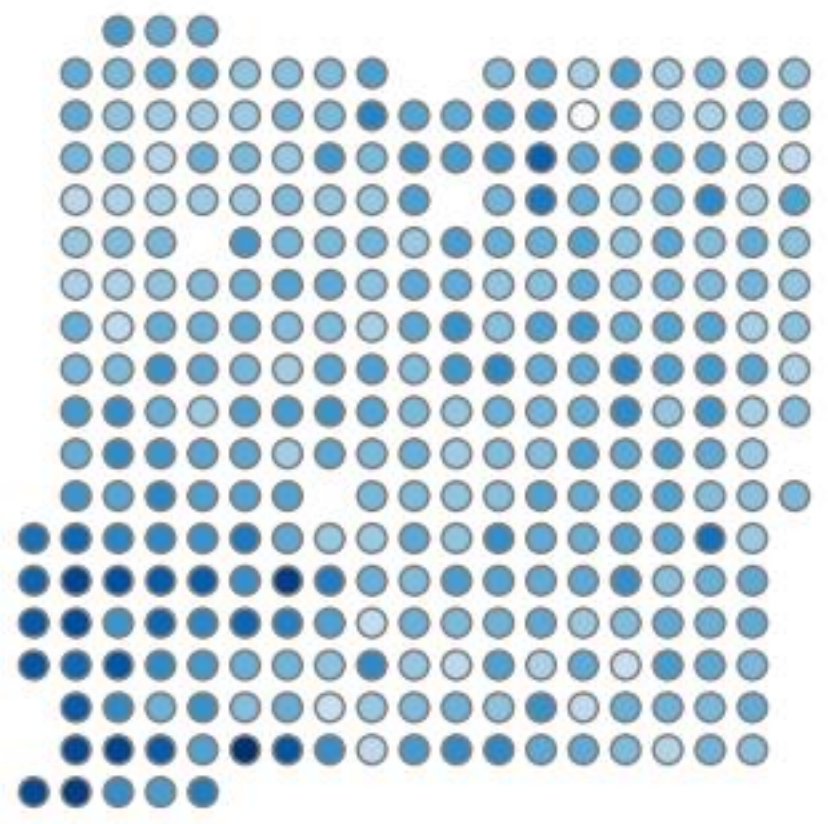

Endothelial

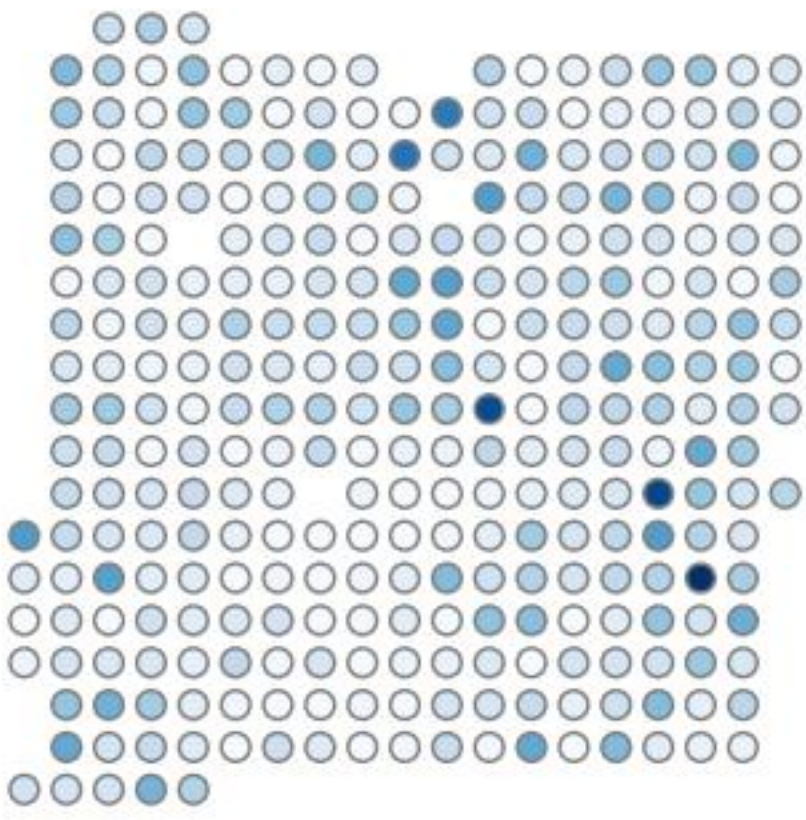

Epithelial

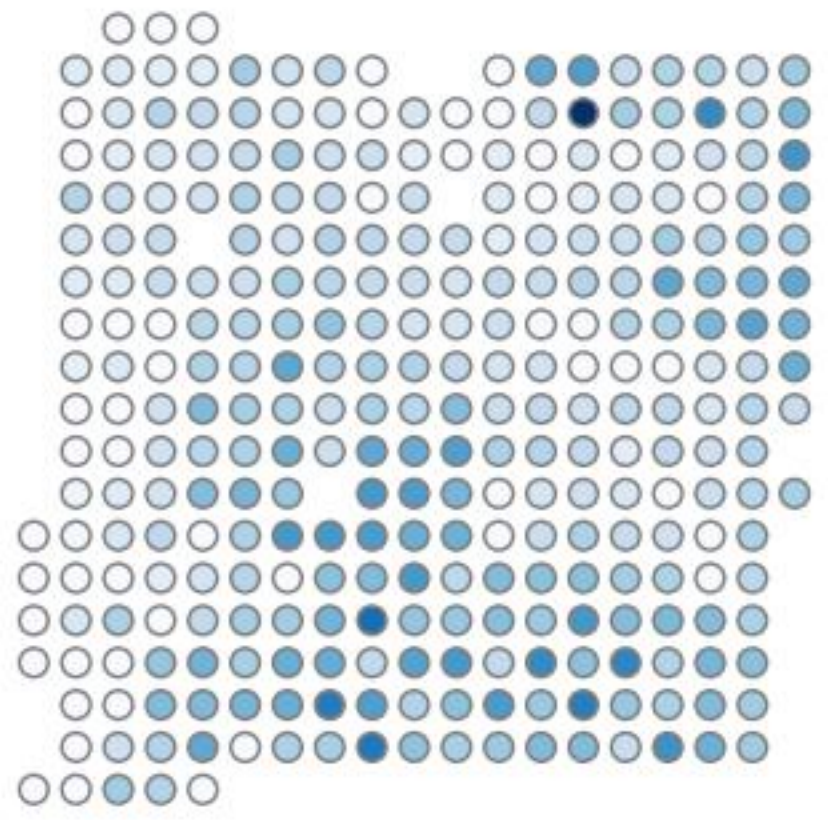

Myeloid

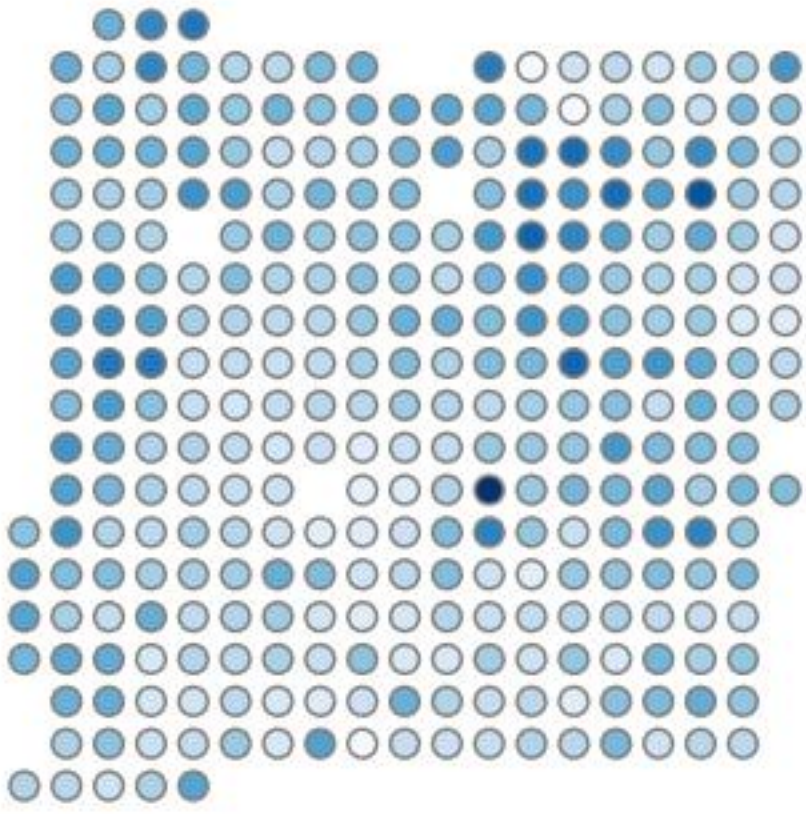

Plasma Cells

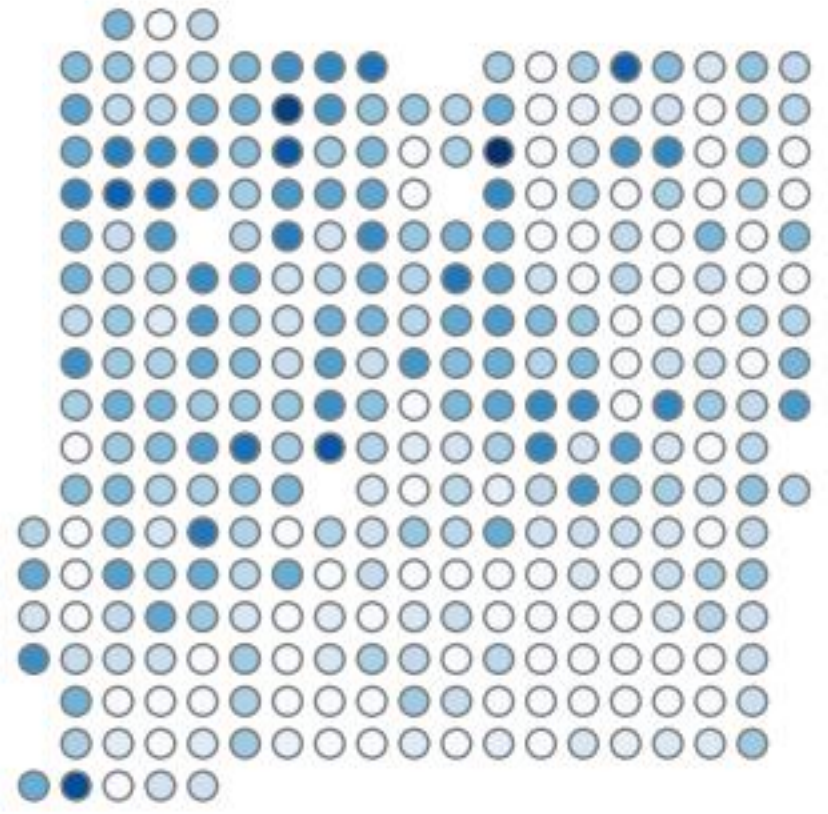

PVL

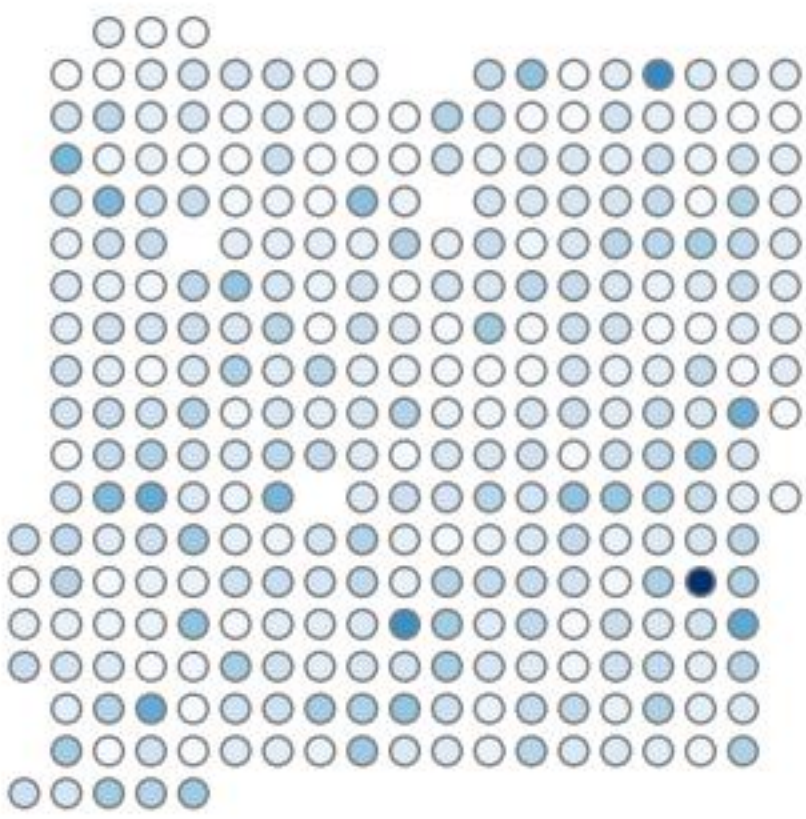

T-cells

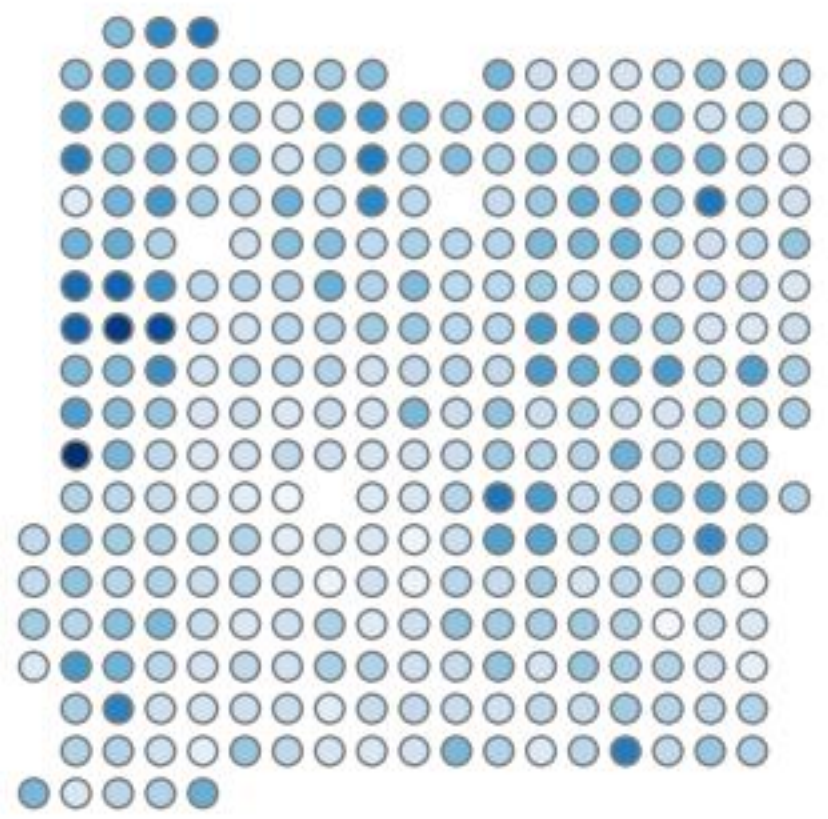



# major\_F3

B-cells

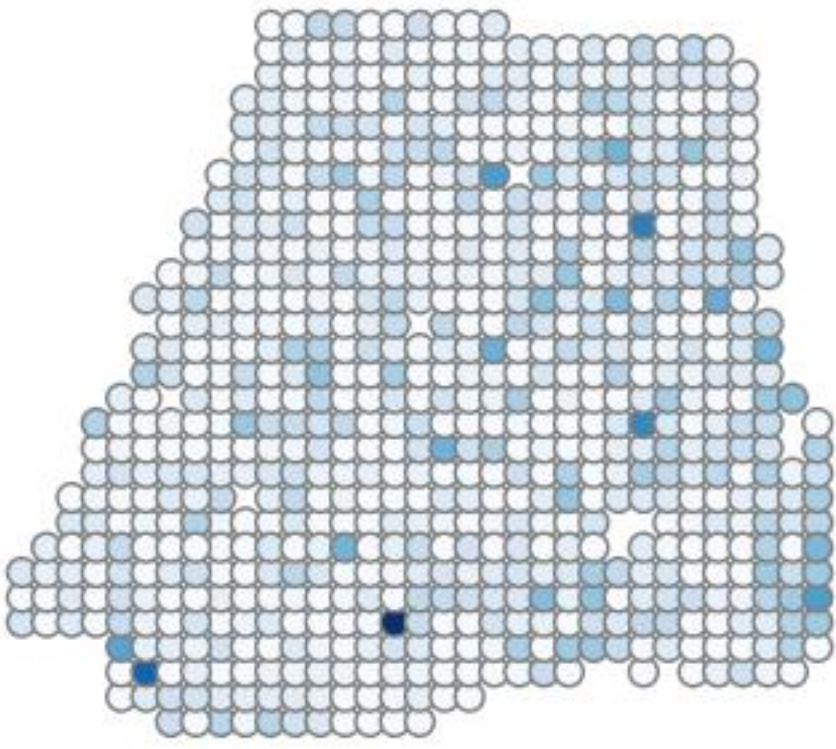

CAFs

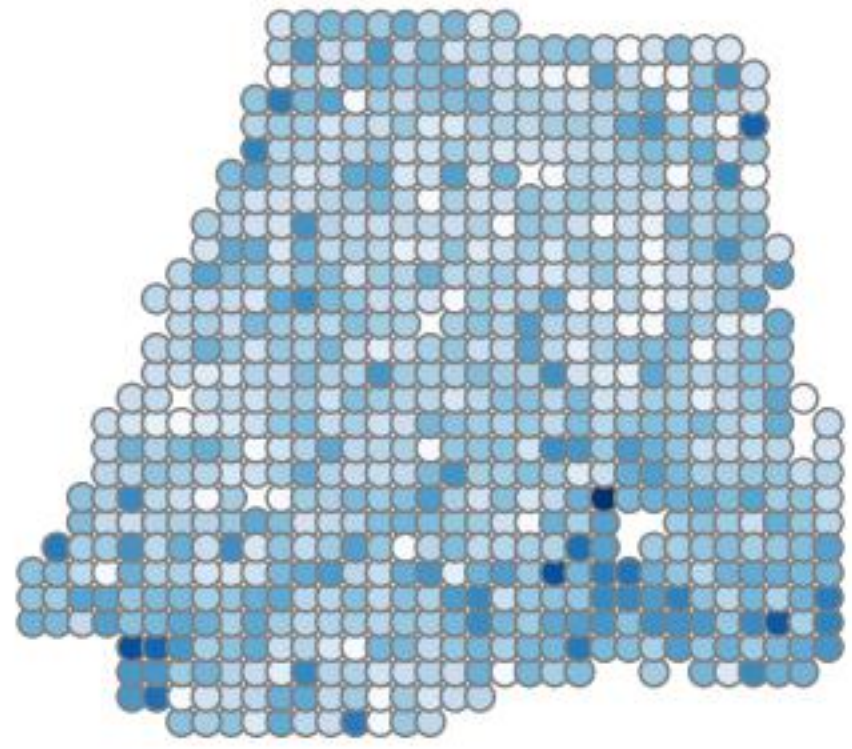

Endothelial

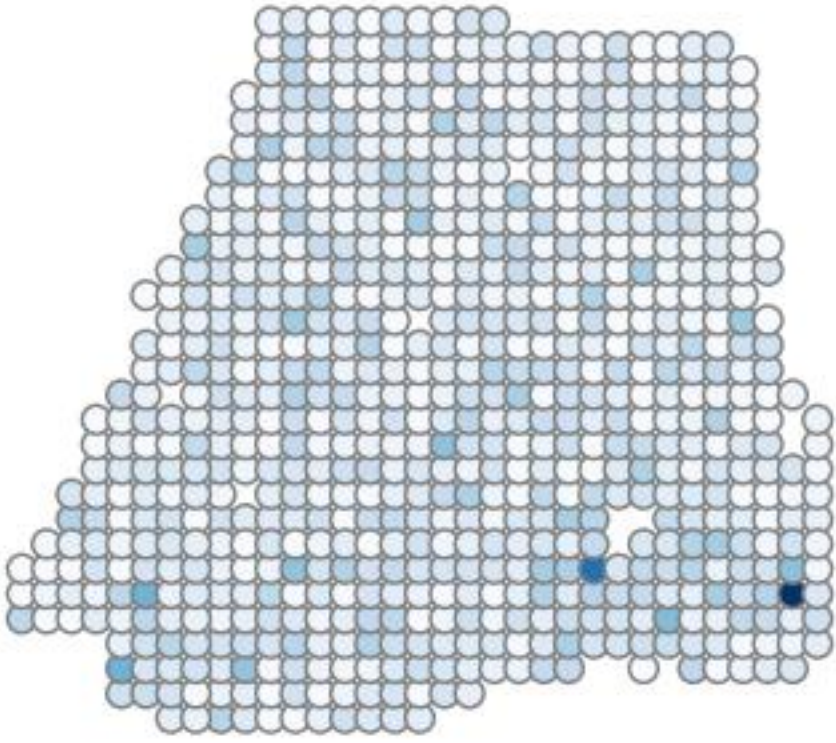

Epithelial

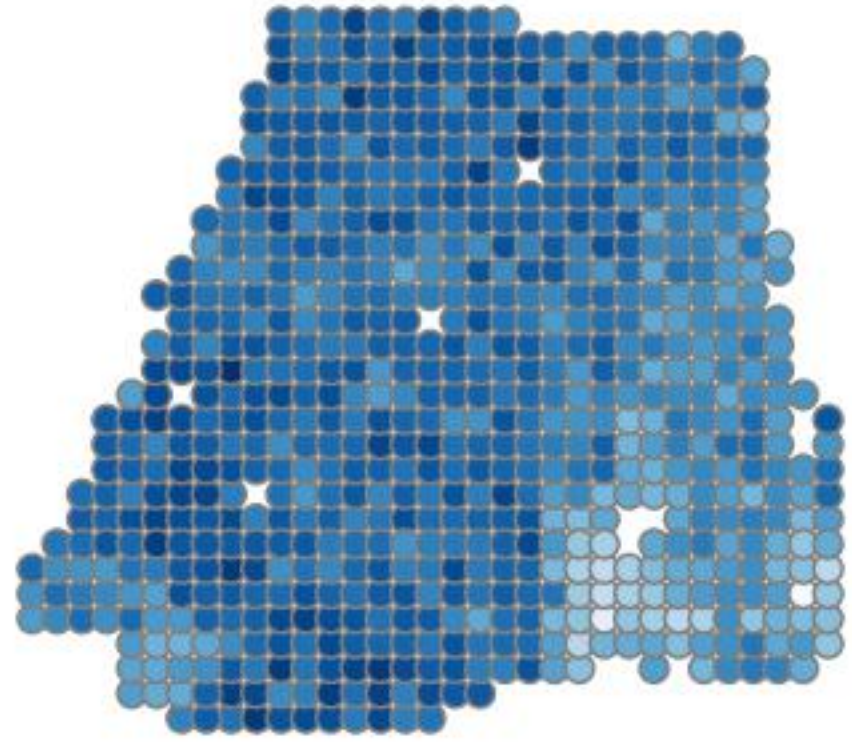

Myeloid

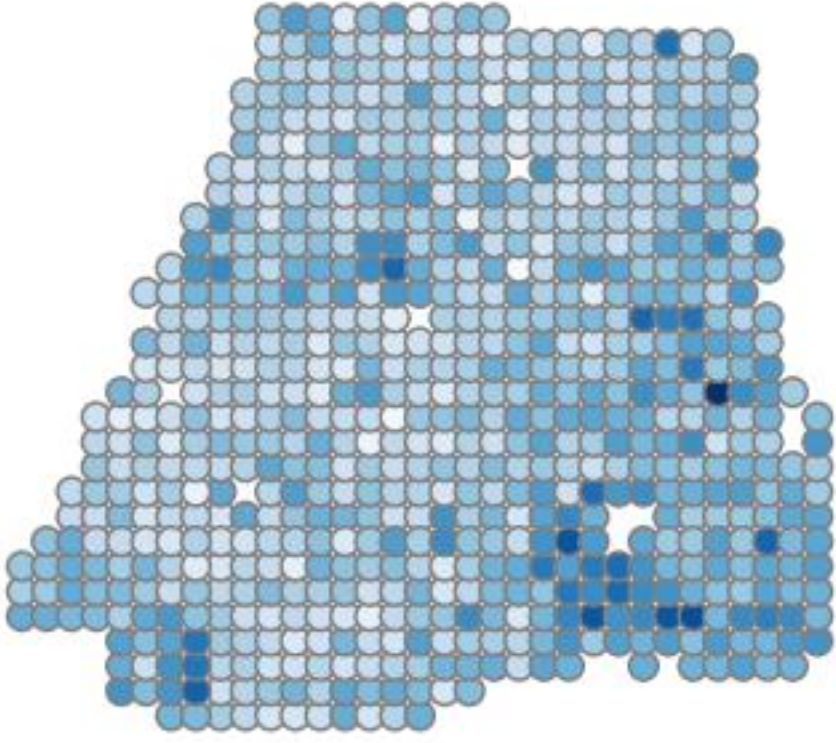

Plasma Cells

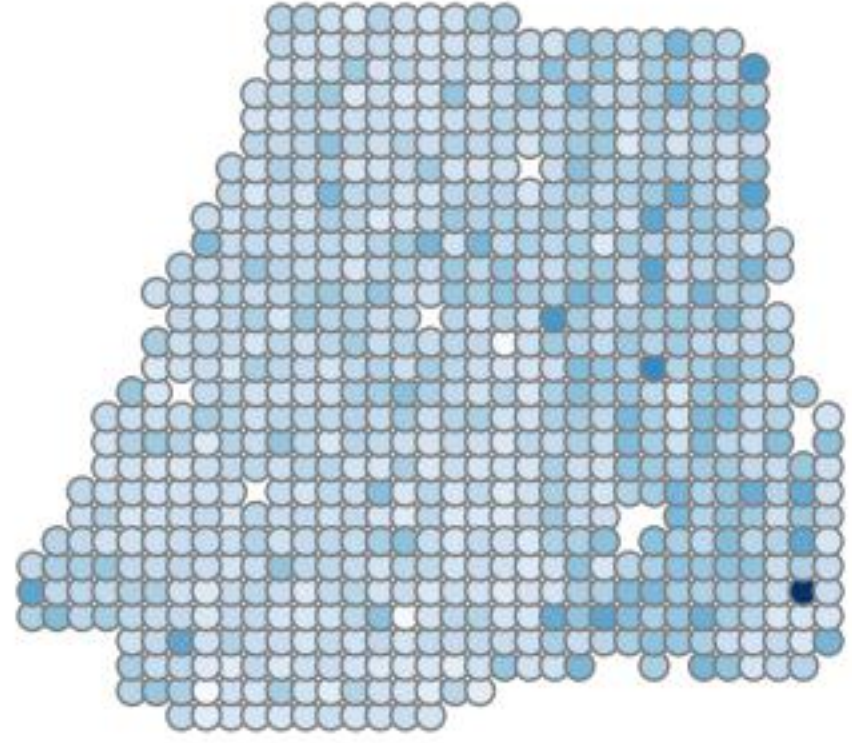

PVL

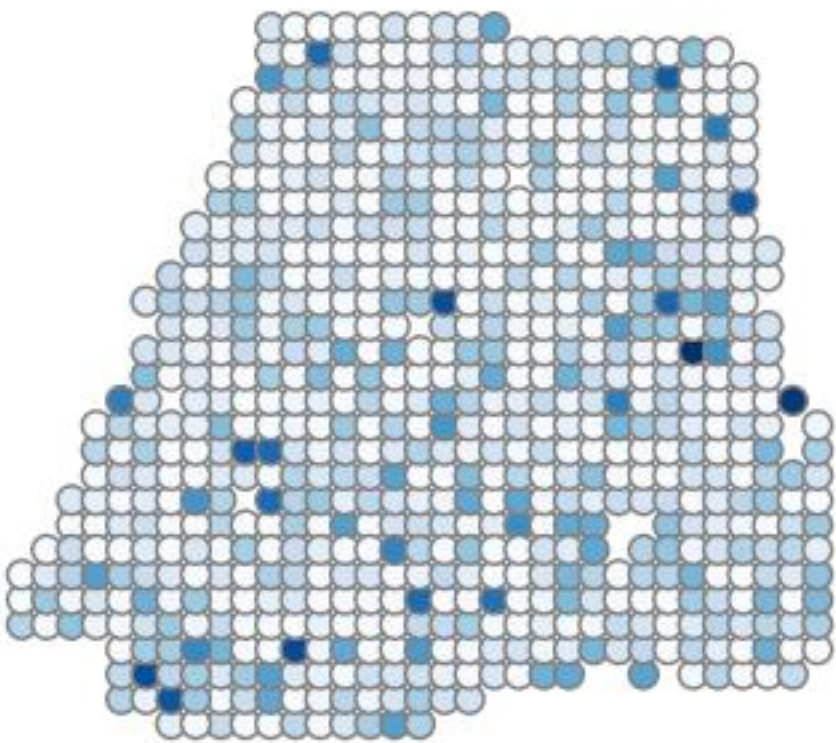

T-cells

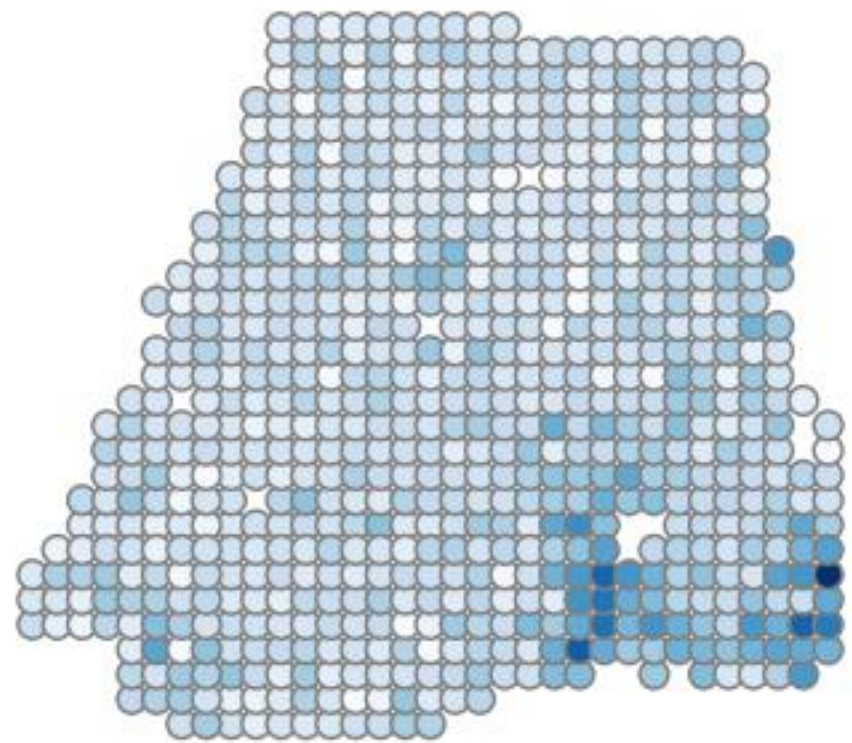

# major\_A1

B-cells

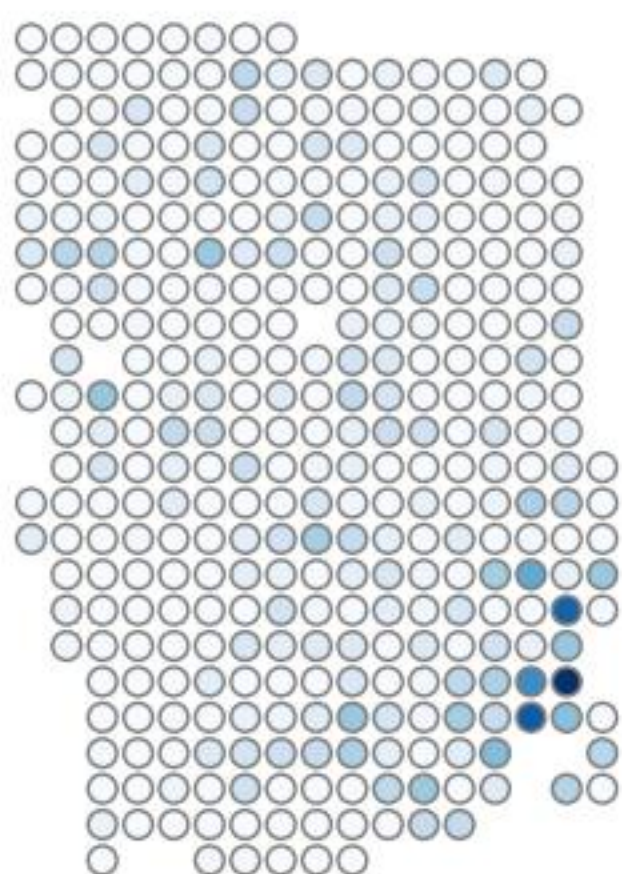

CAFs

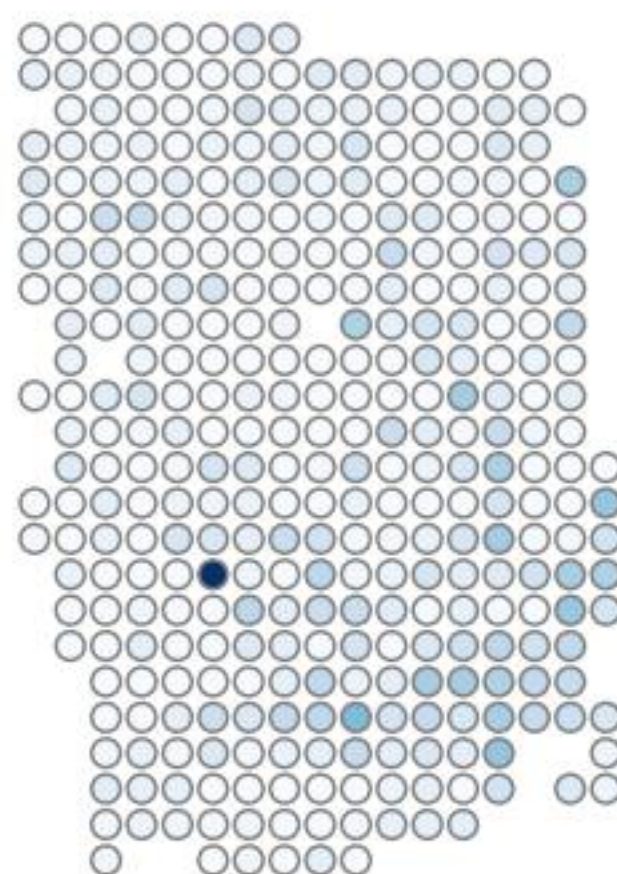

Endothelial

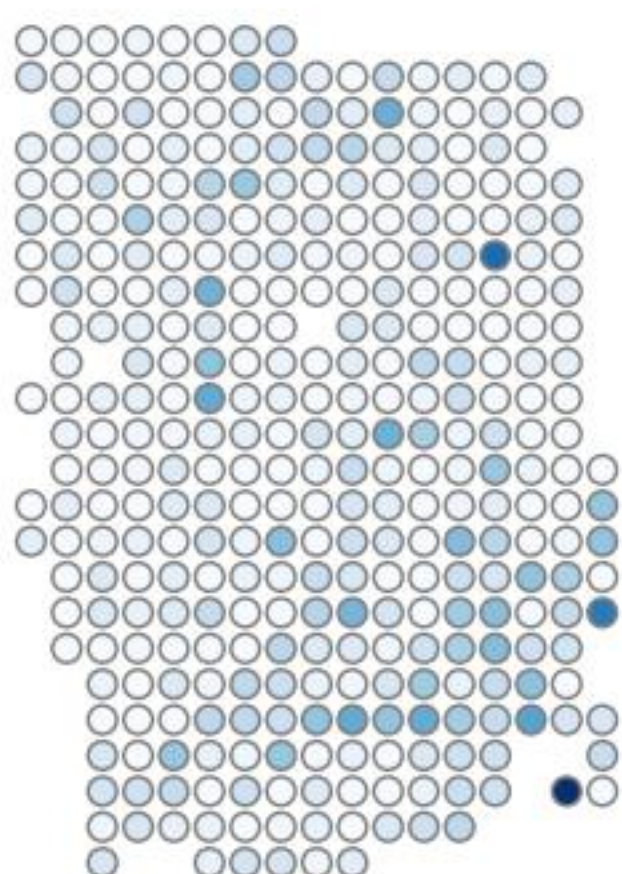

Epithelial

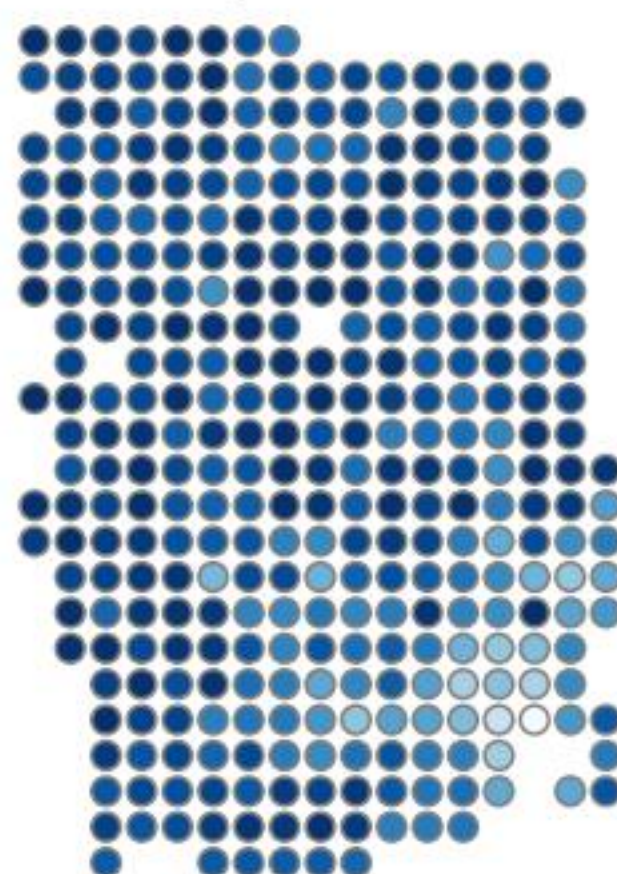

Myeloid

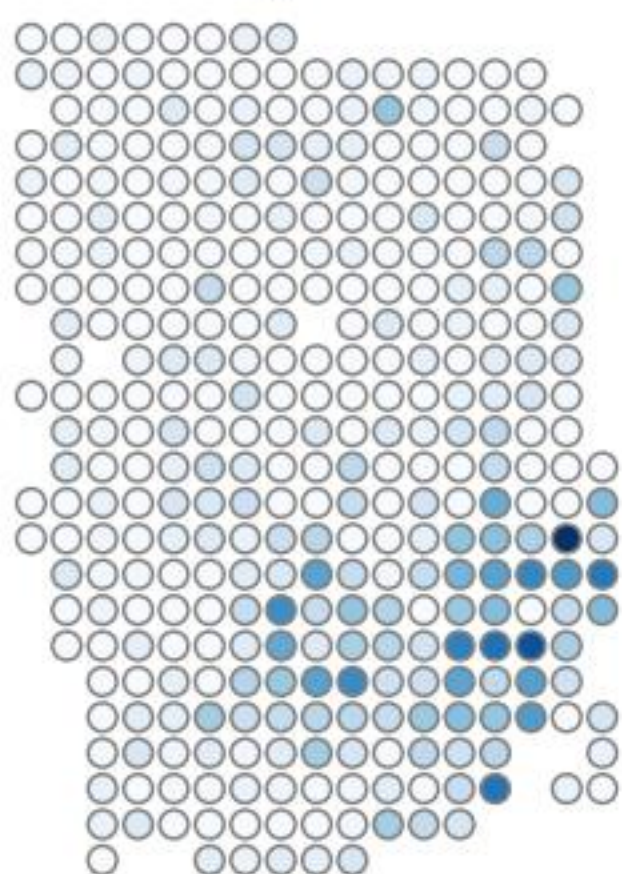

Plasma Cells

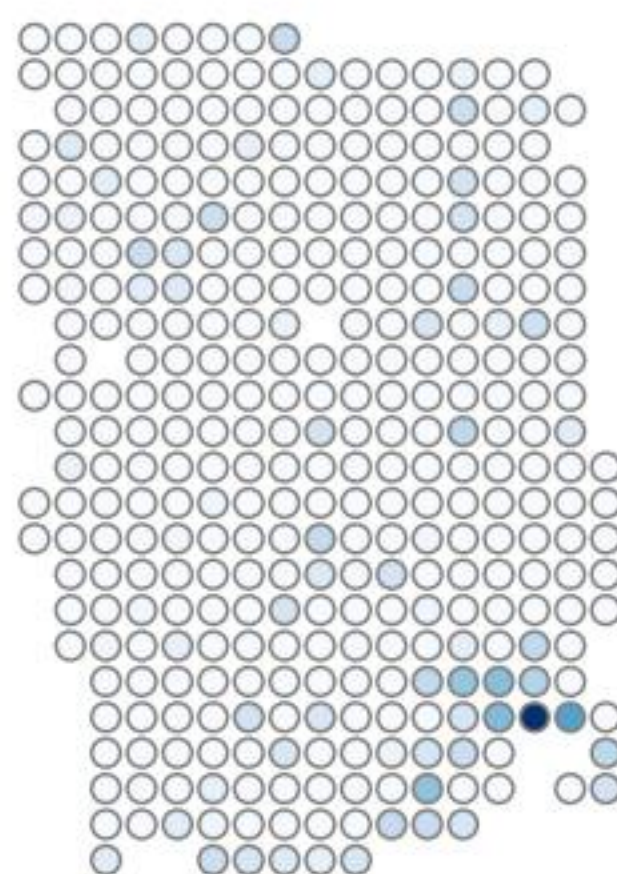

PVL

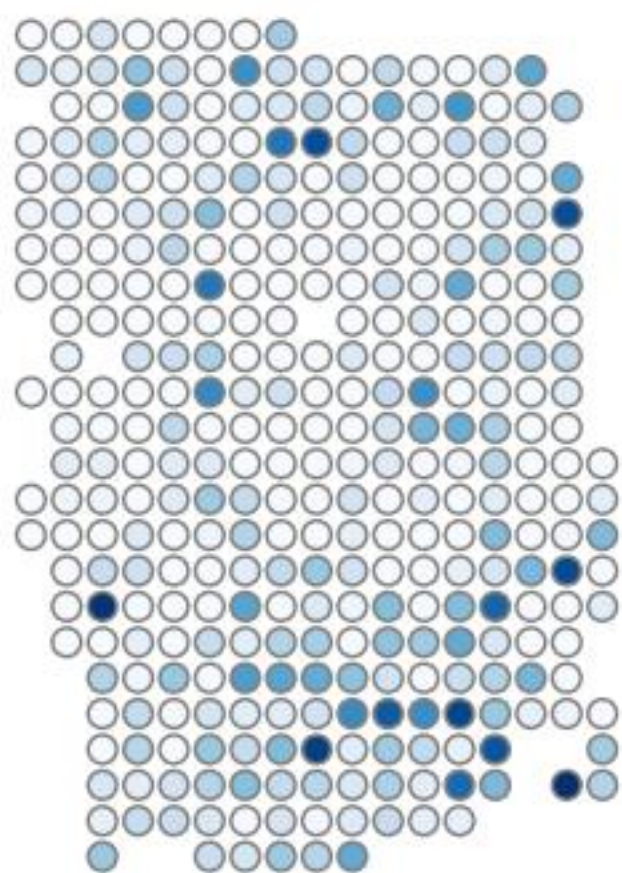

T-cells

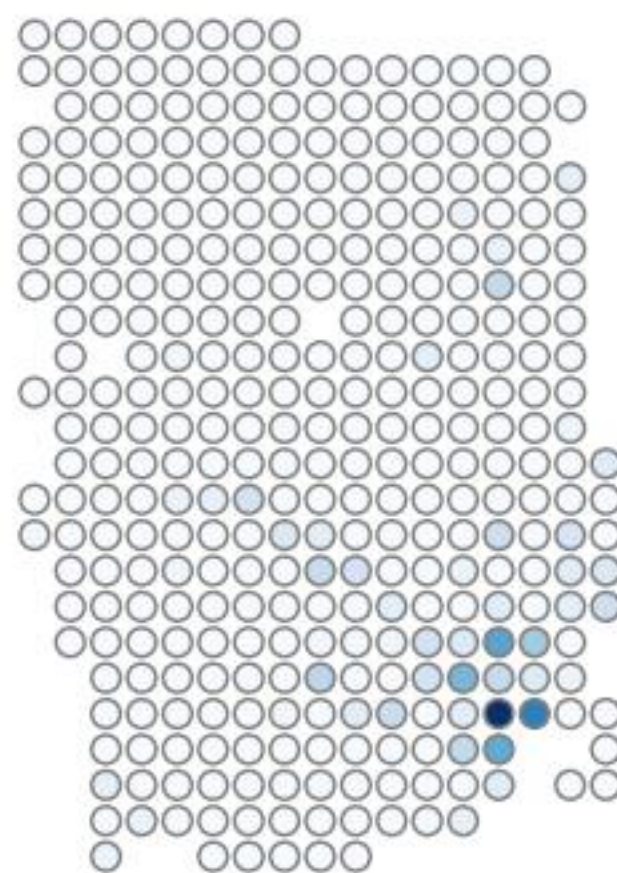

# major\_H1

B-cells

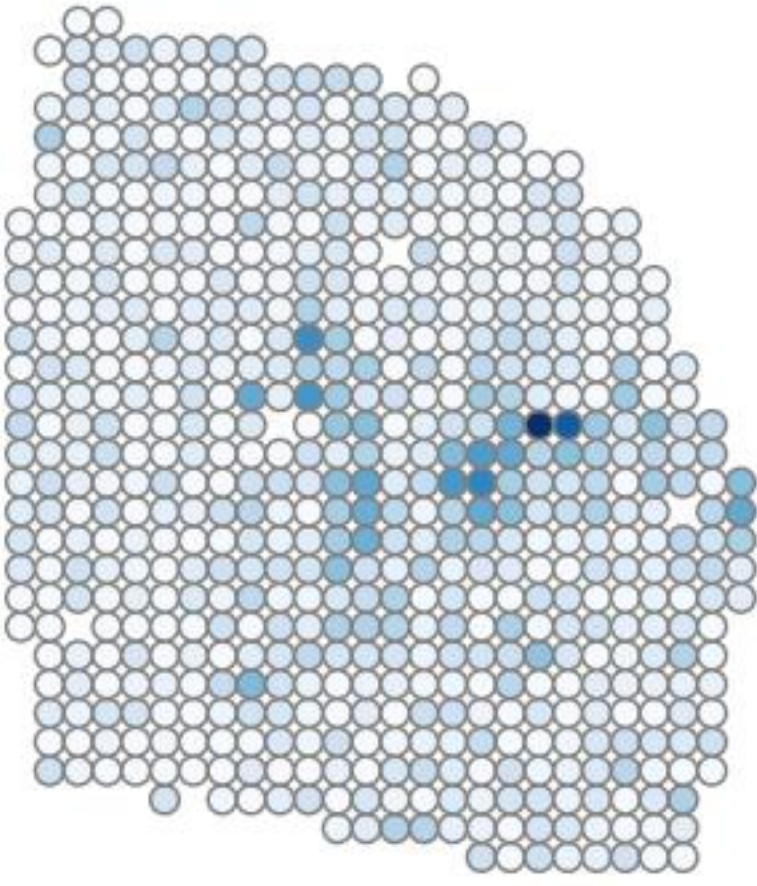

CAFs

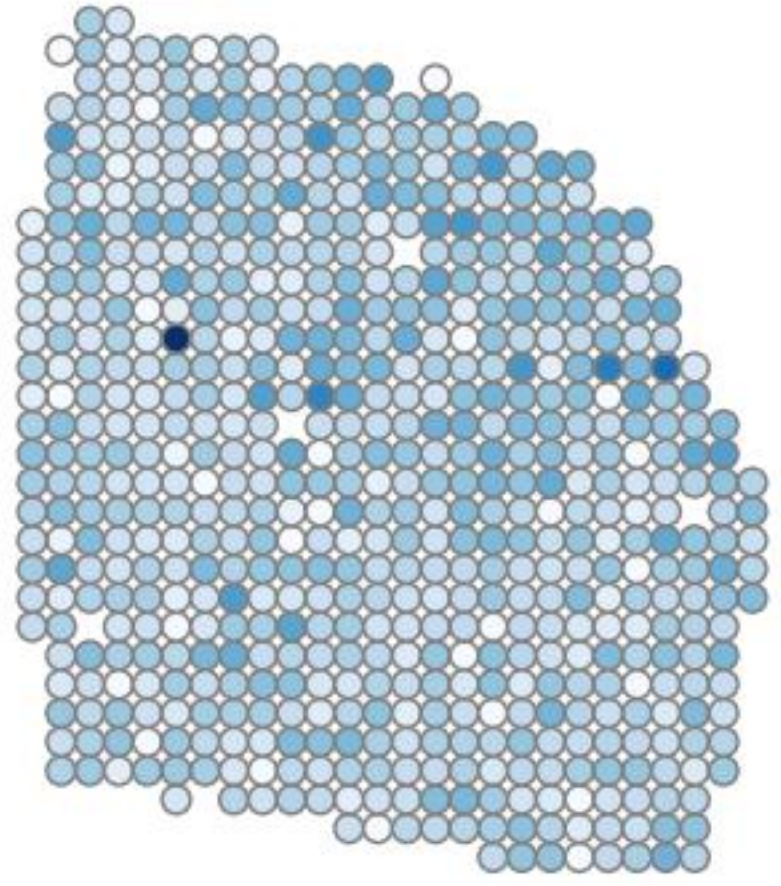

Endothelial

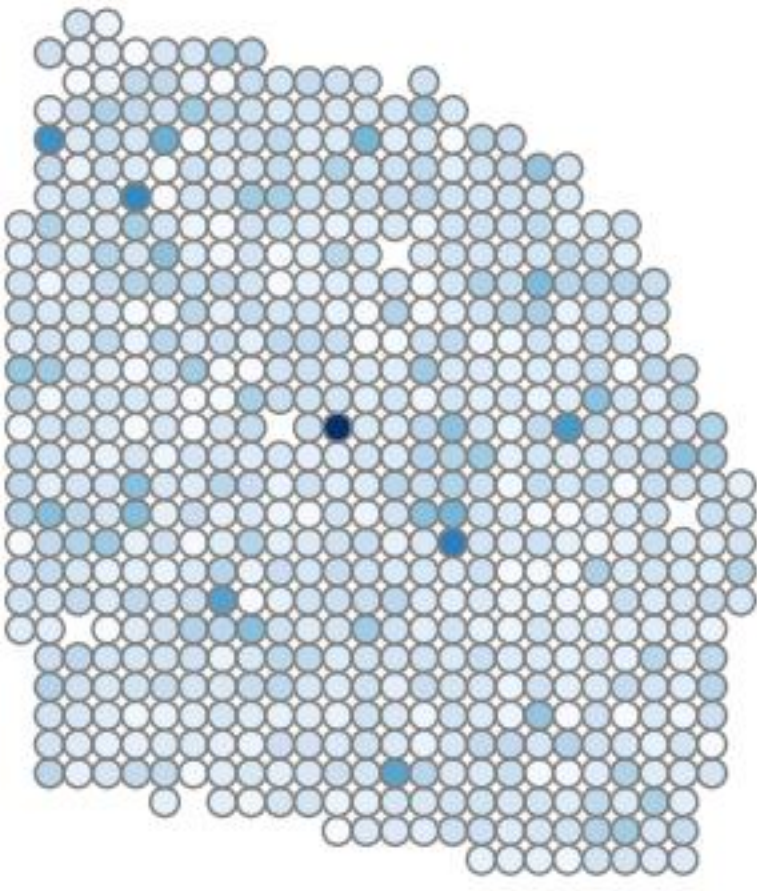

Epithelial

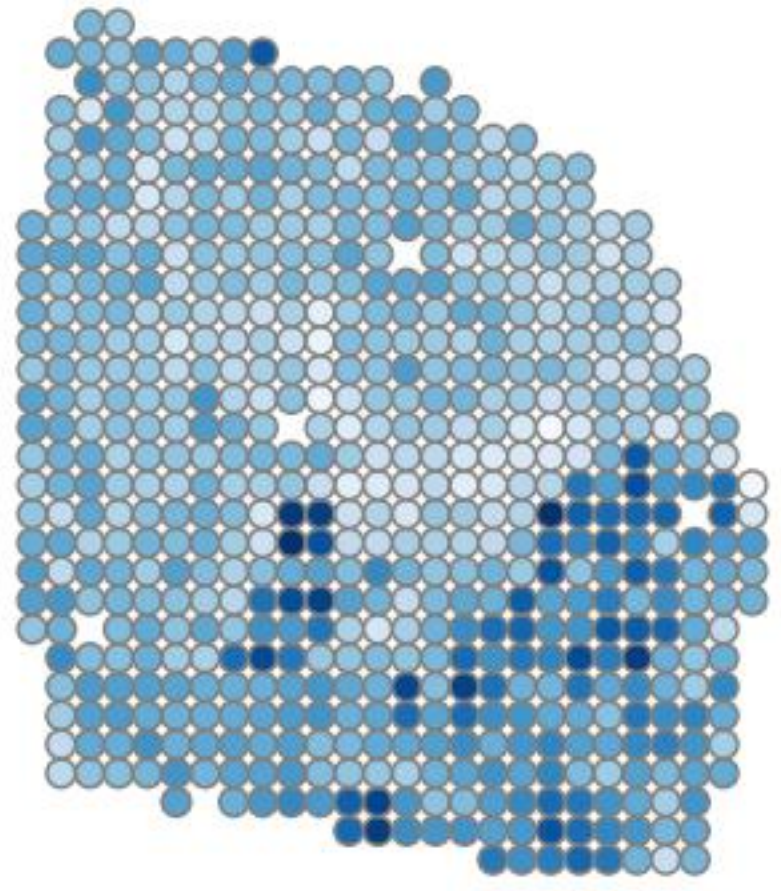

Myeloid

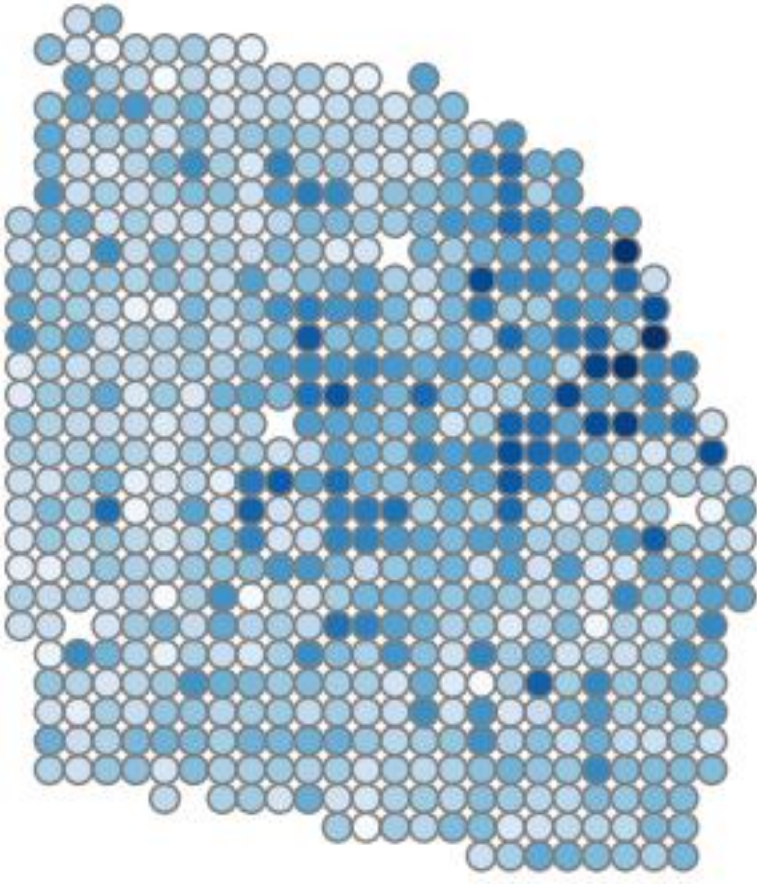

Plasma Cells

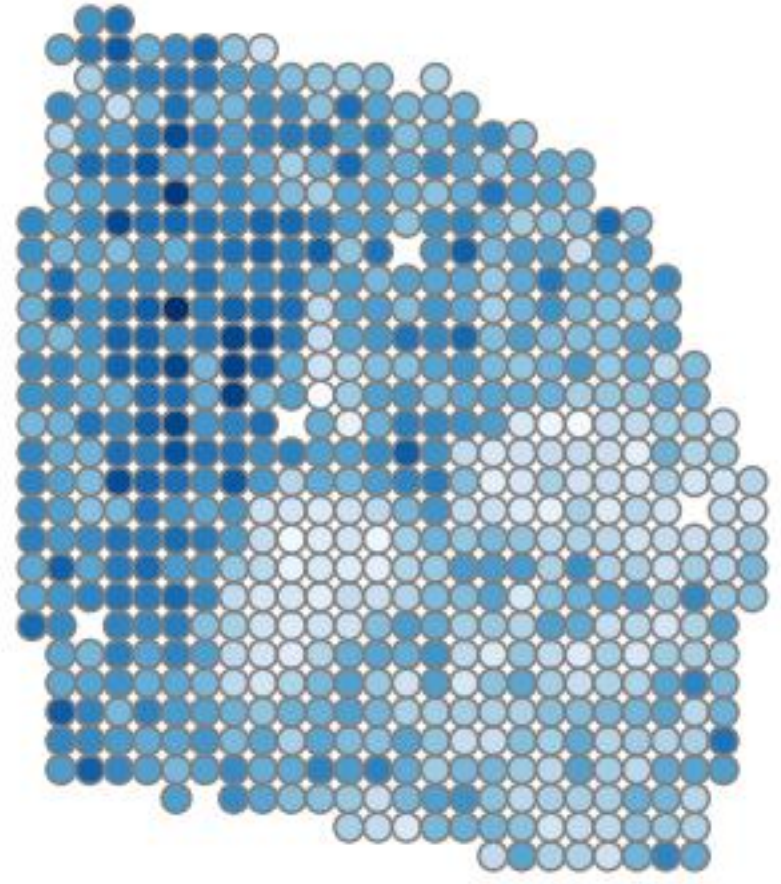

PVL

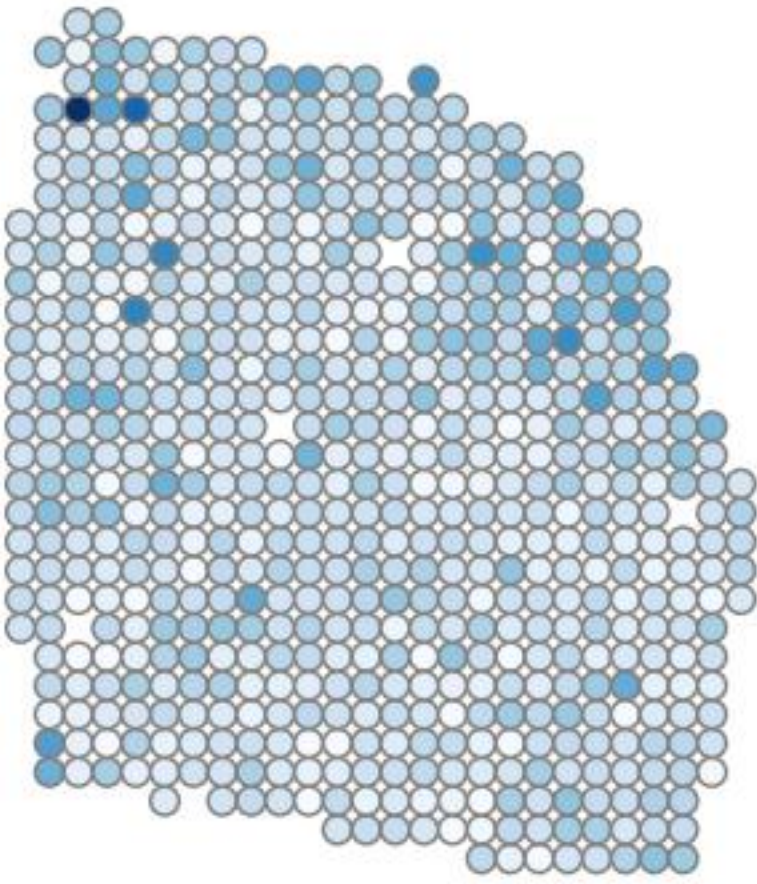

T-cells

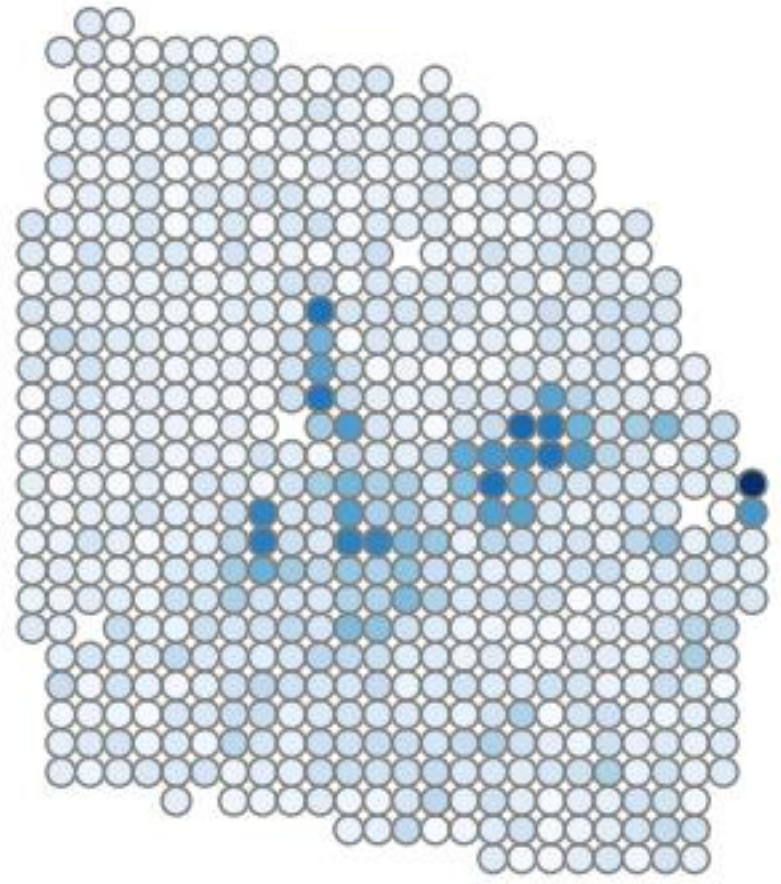

# major\_F2

B-cells

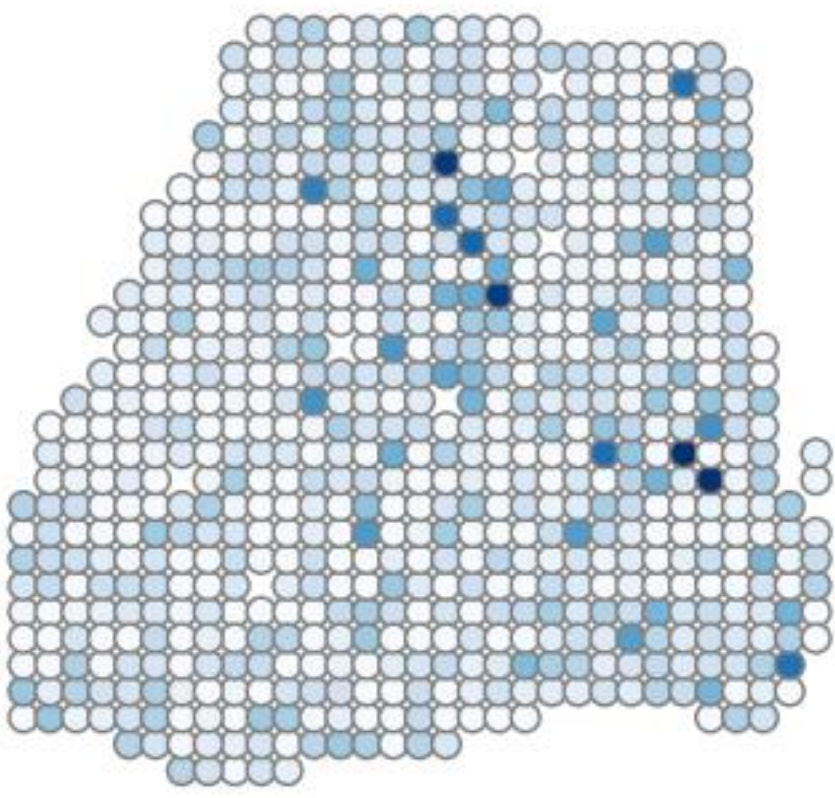

CAFs

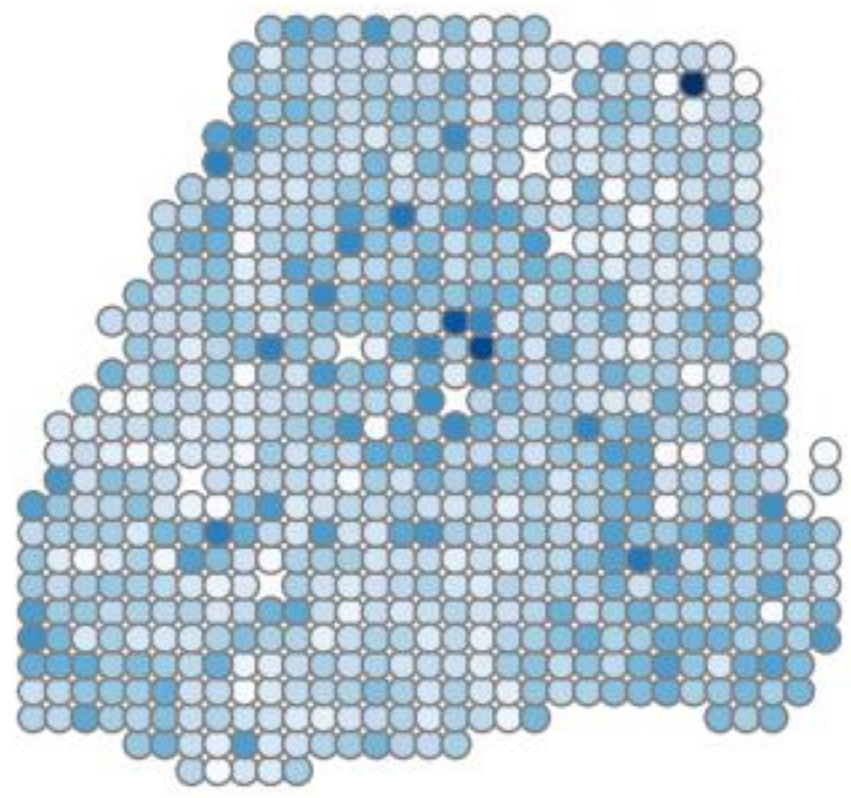

Endothelial

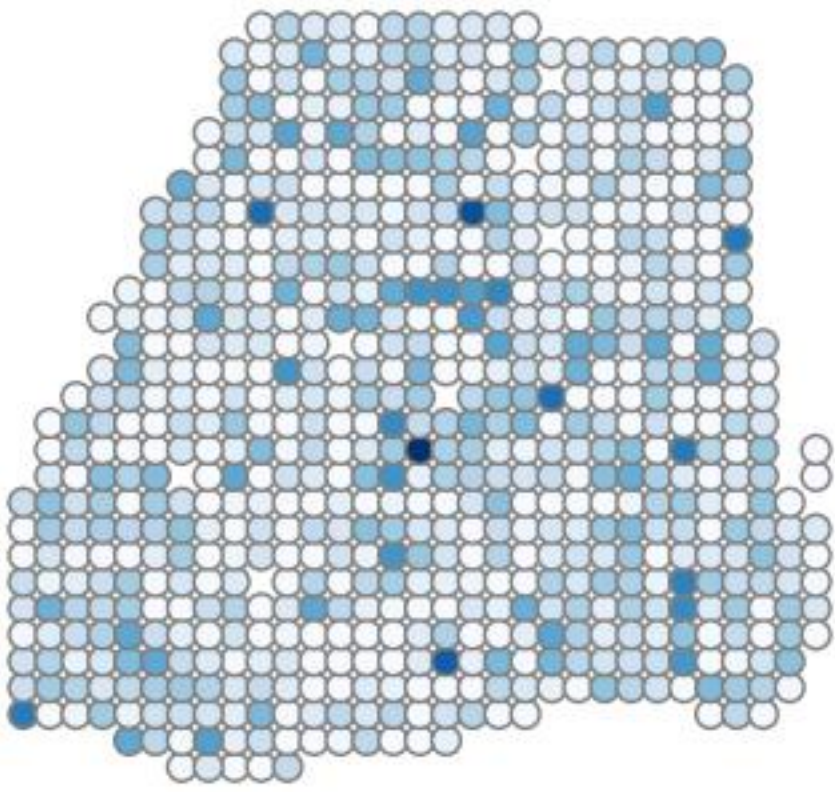

Epithelial

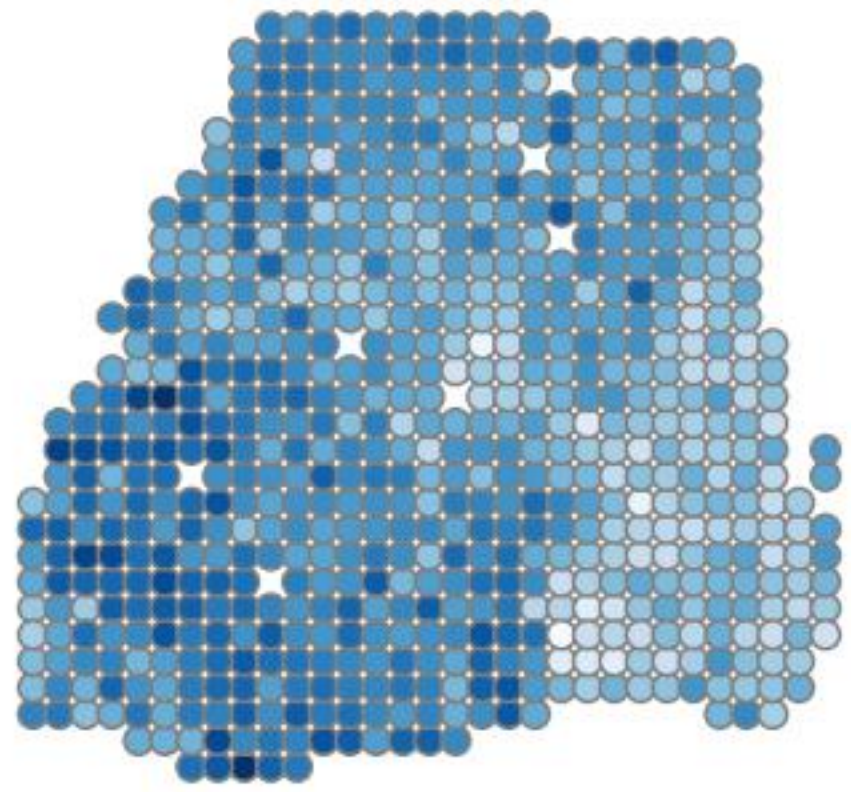

Myeloid

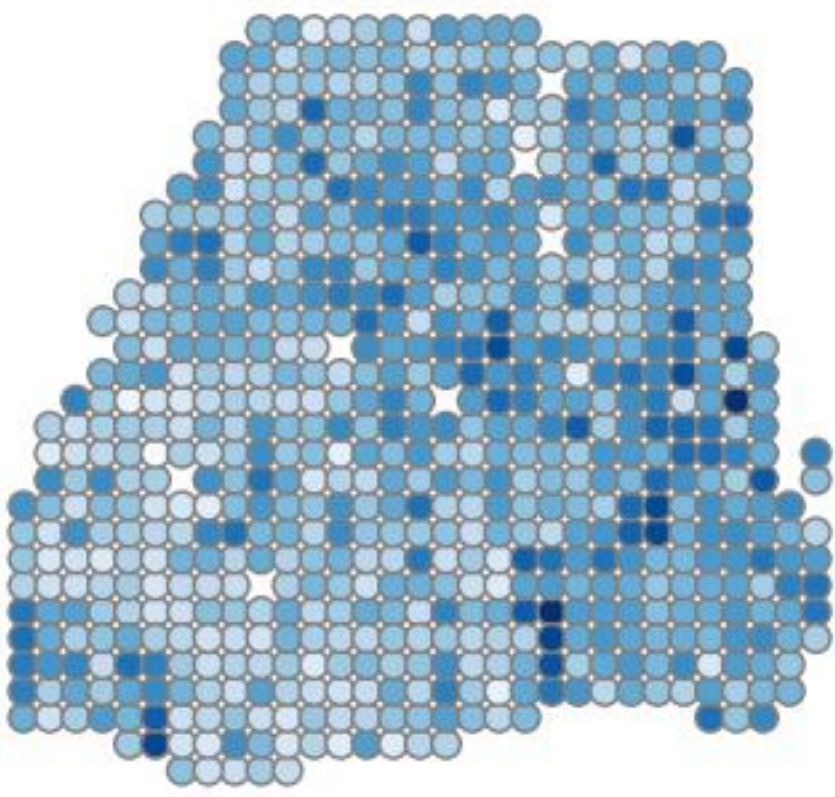

Plasma Cells

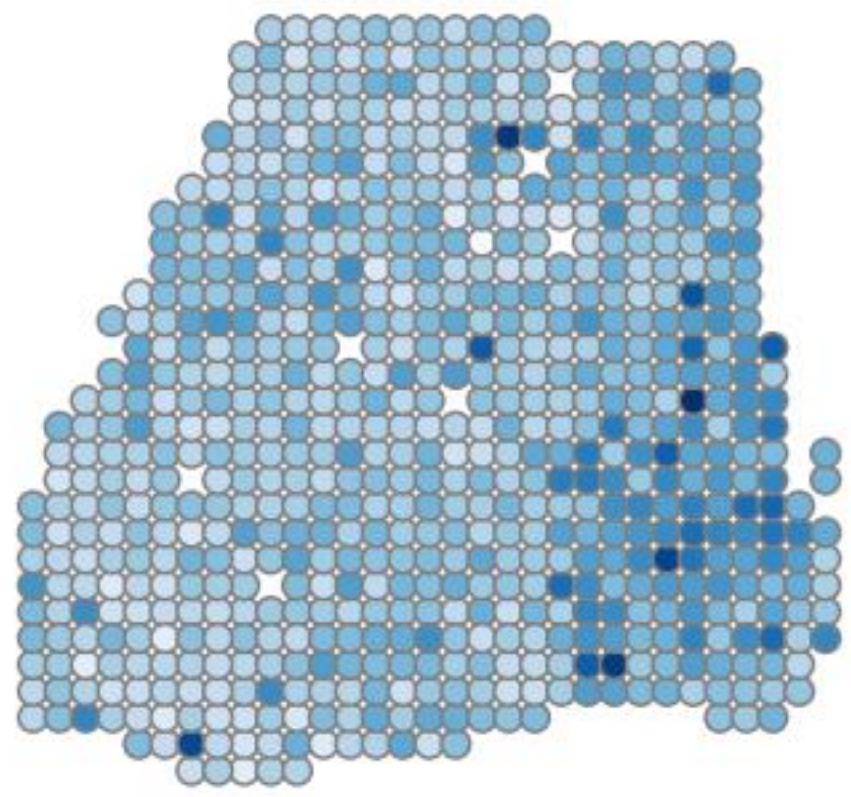

PVL

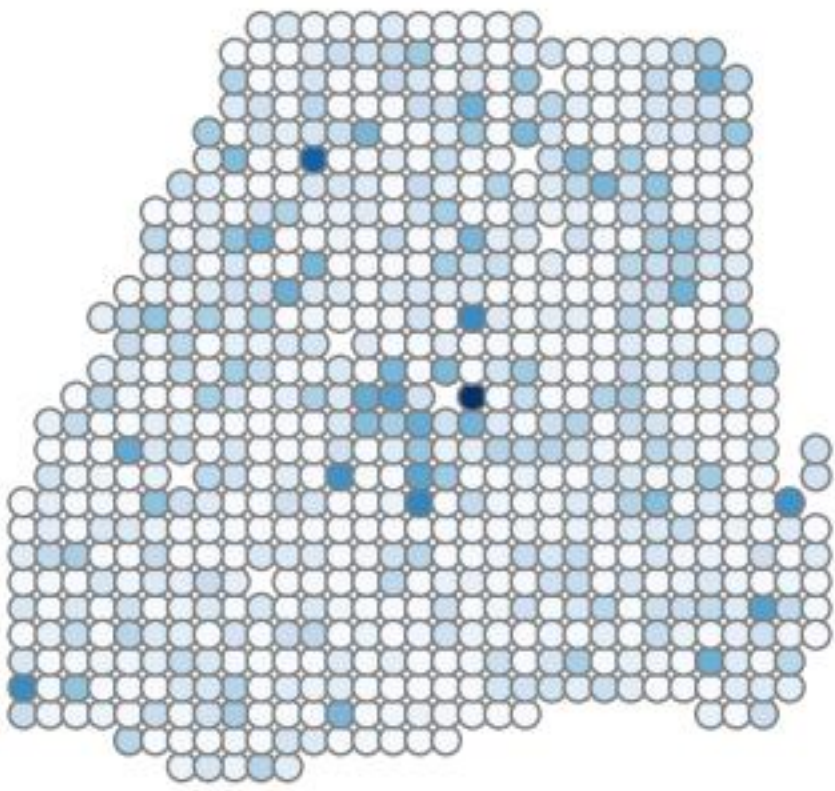

T-cells

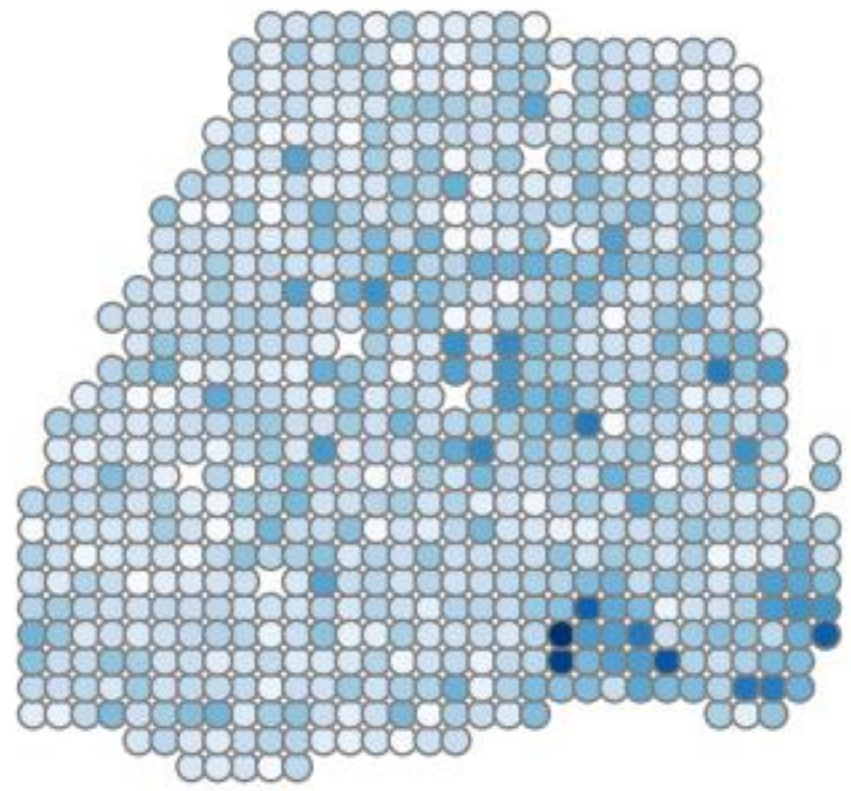

# major\_E2

B-cells

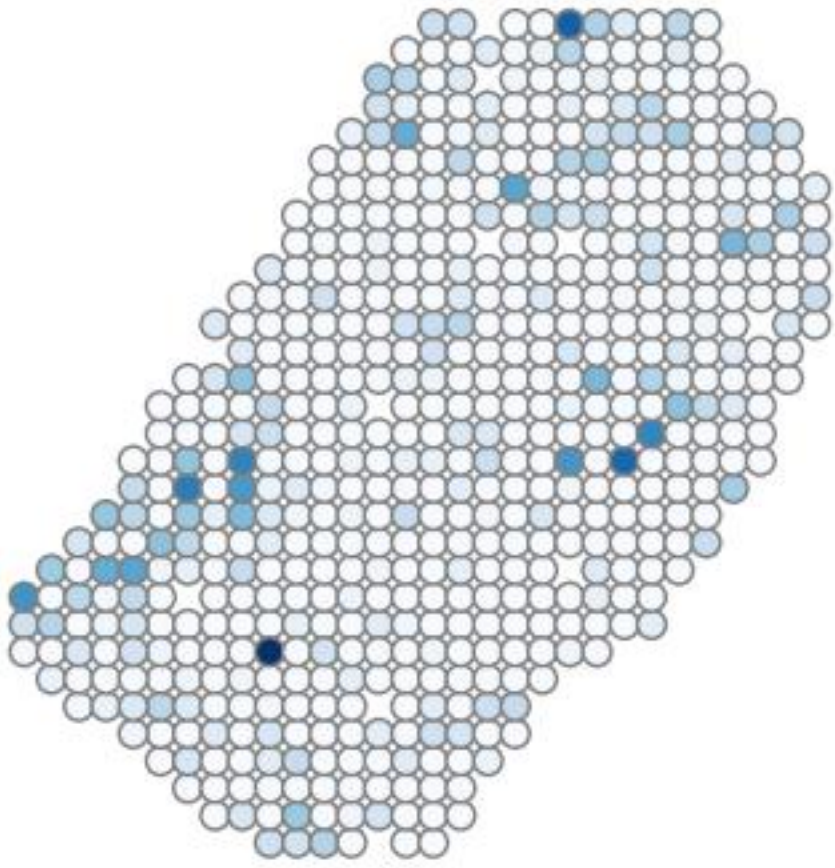

CAFs

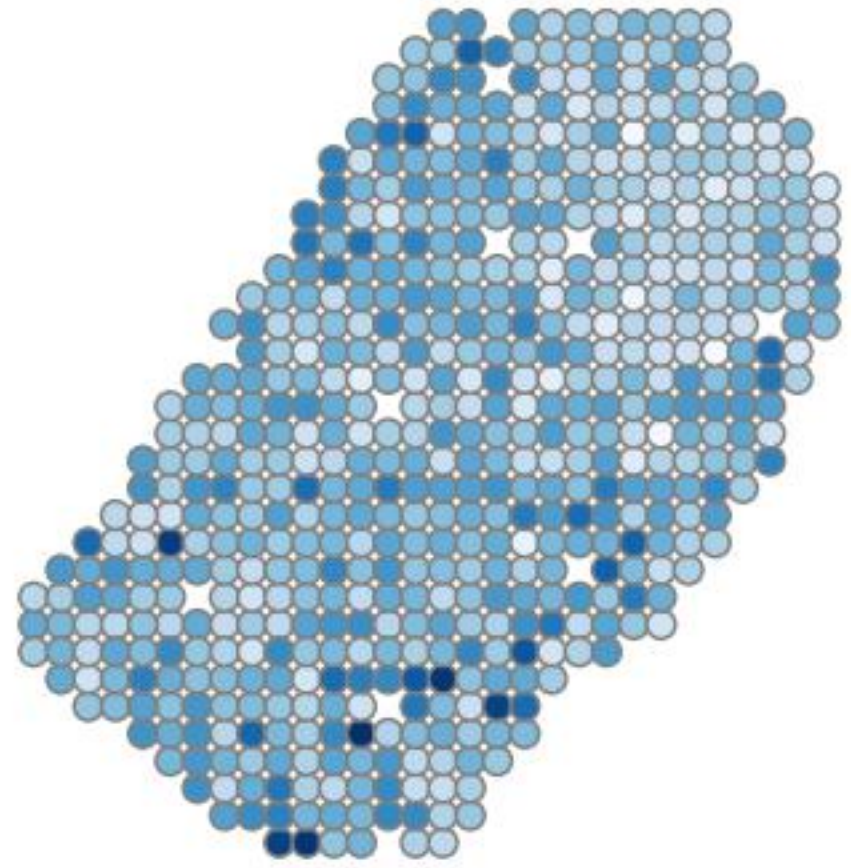

Endothelial

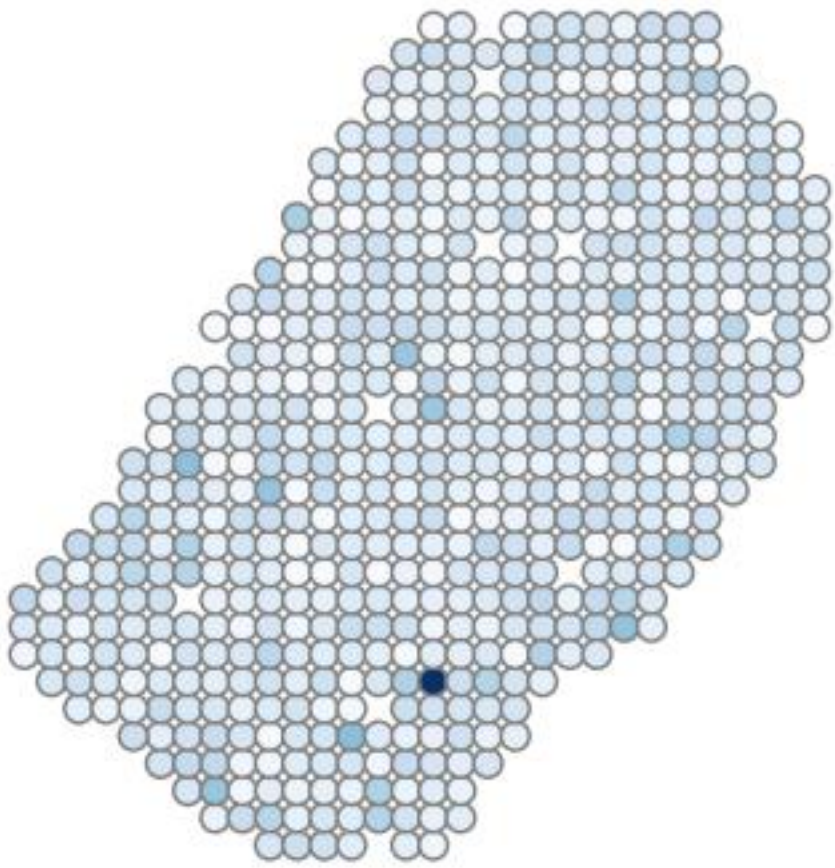

Epithelial

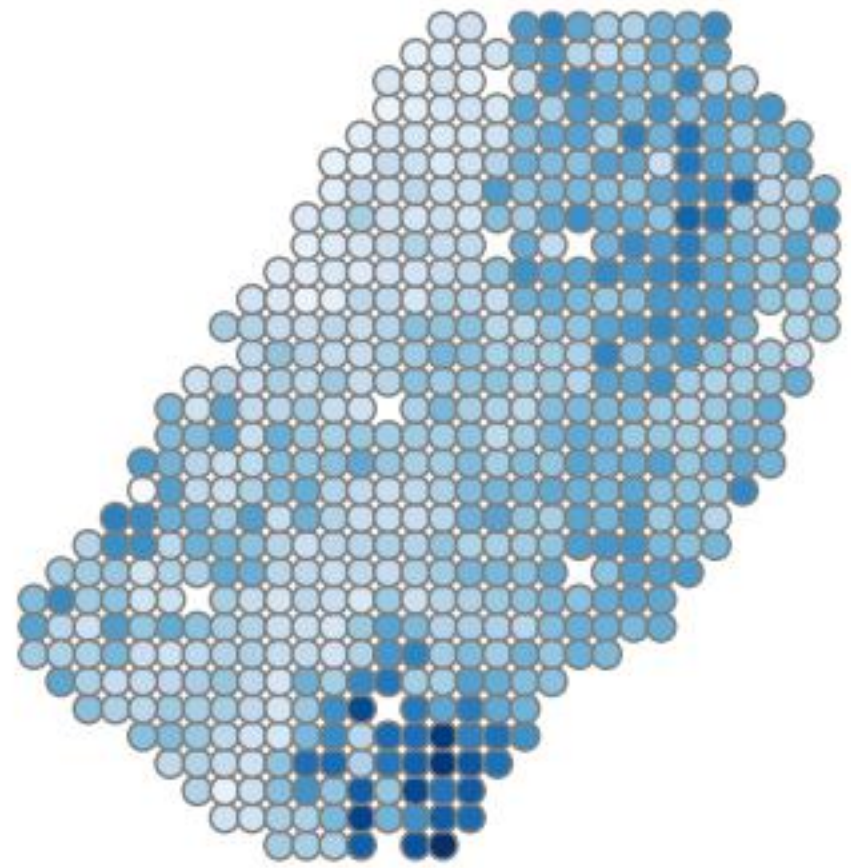

Myeloid

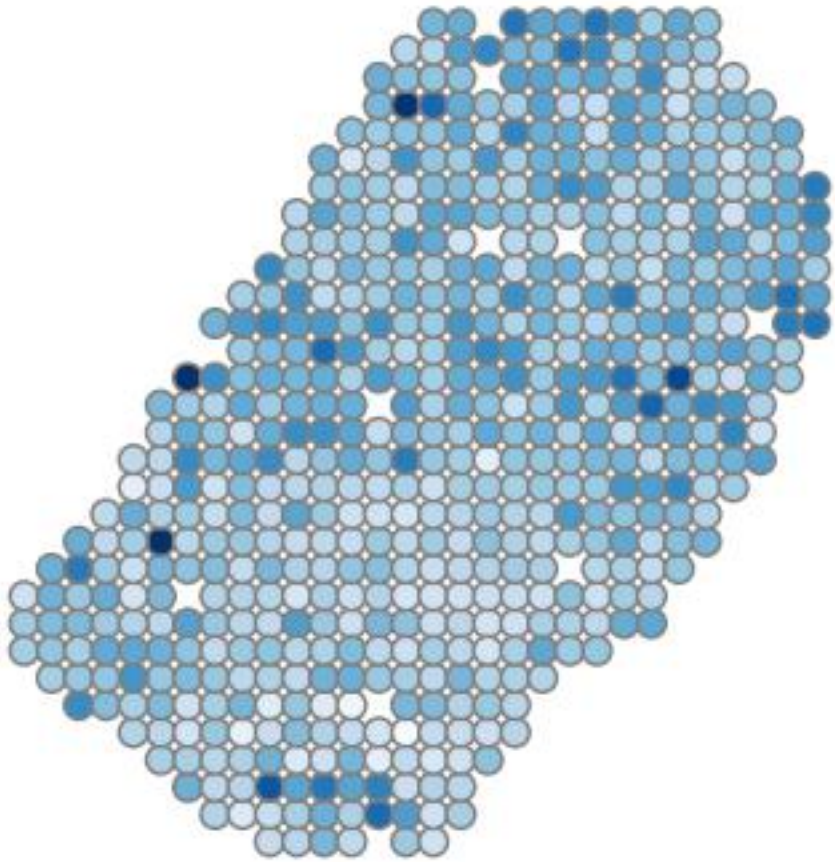

Plasma Cells

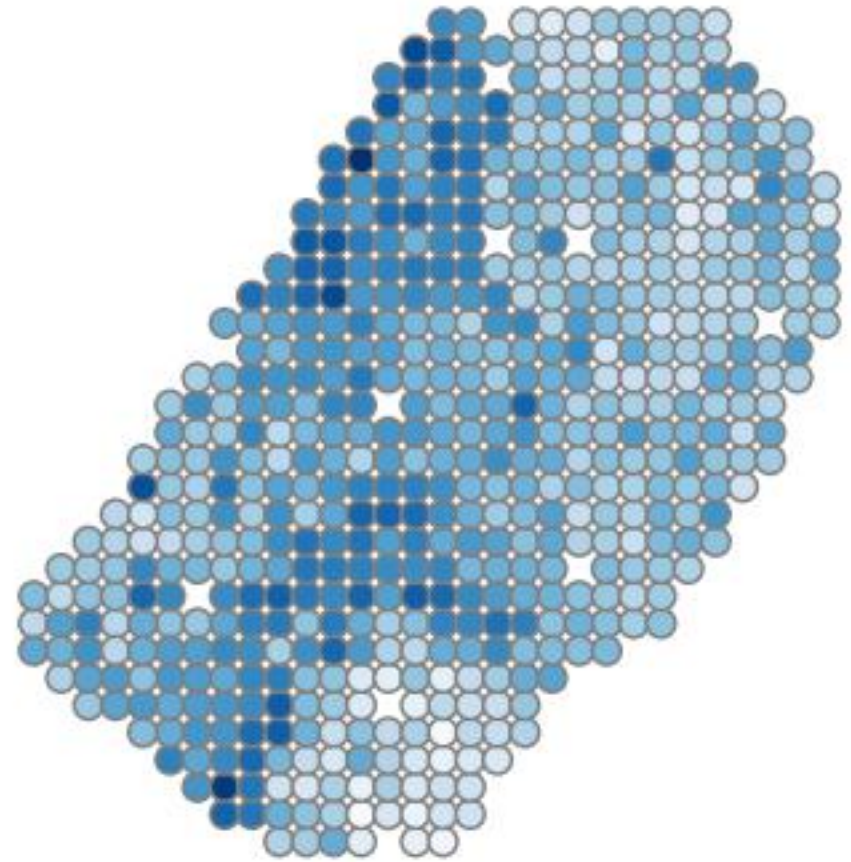

PVL

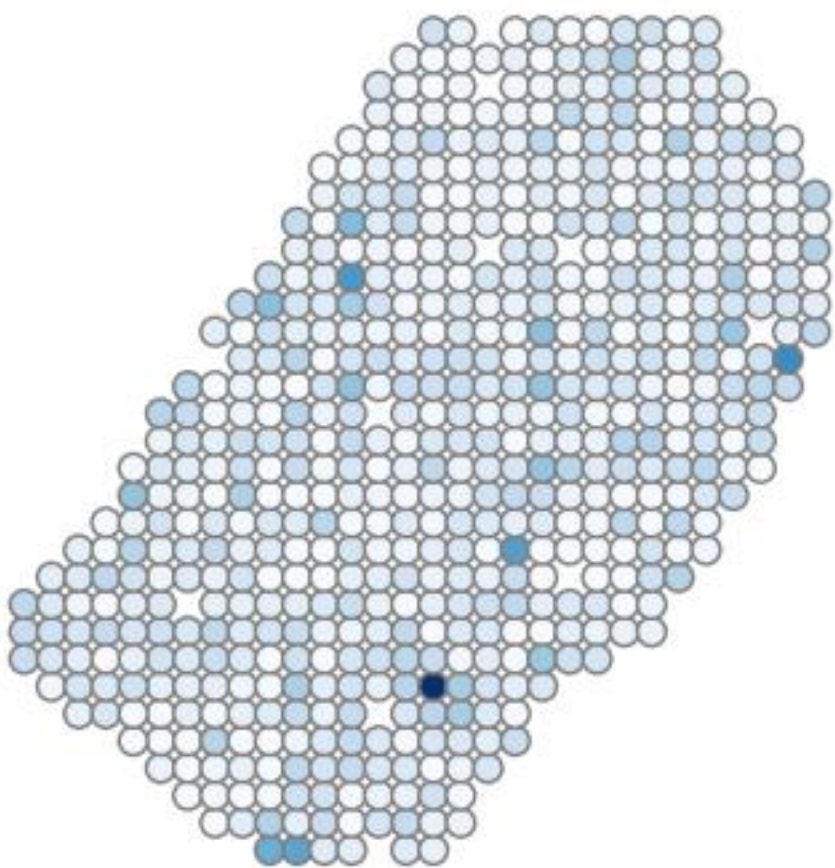

T-cells

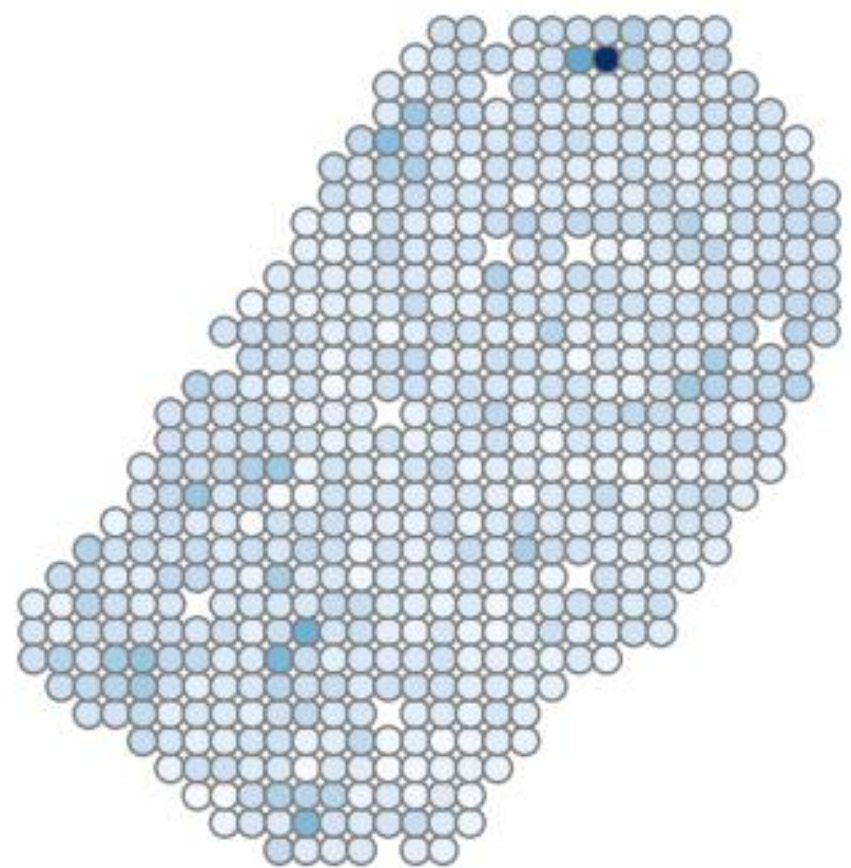

# major\_C4

B-cells

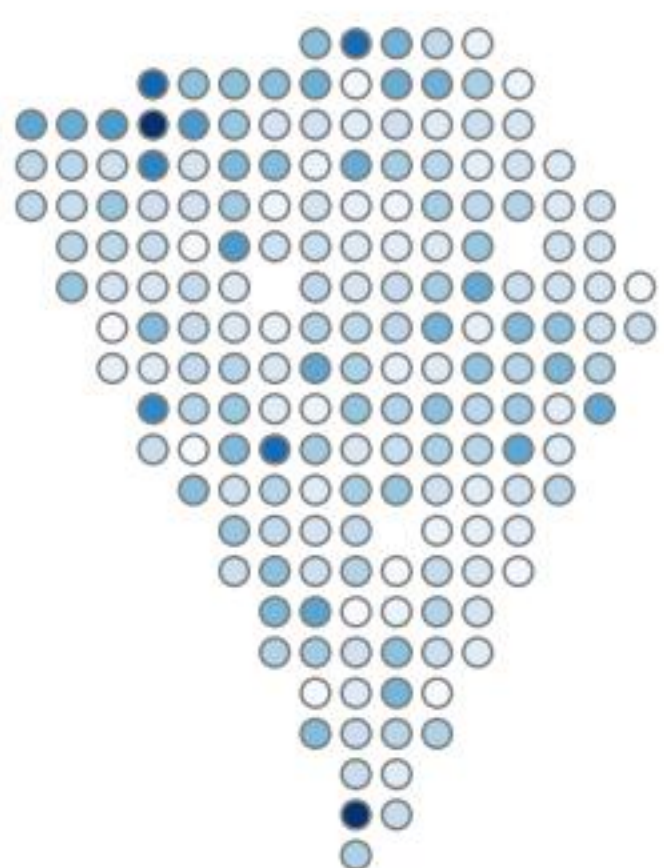

CAFs

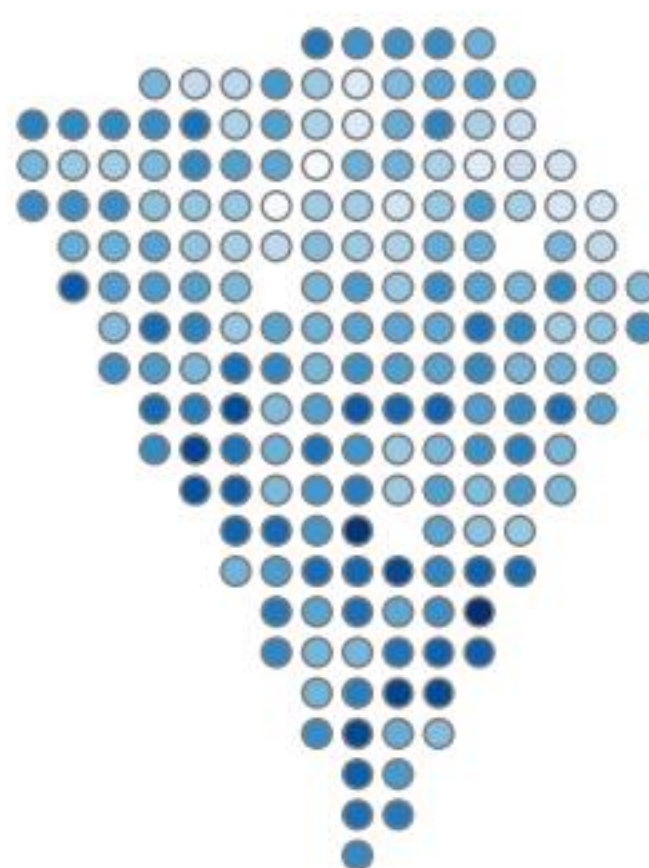

Endothelial

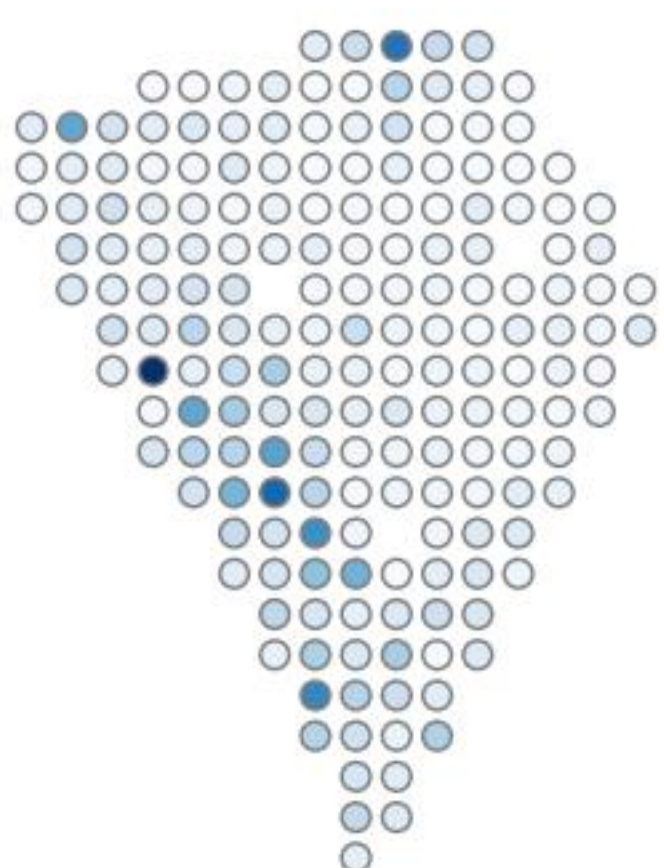

Epithelial

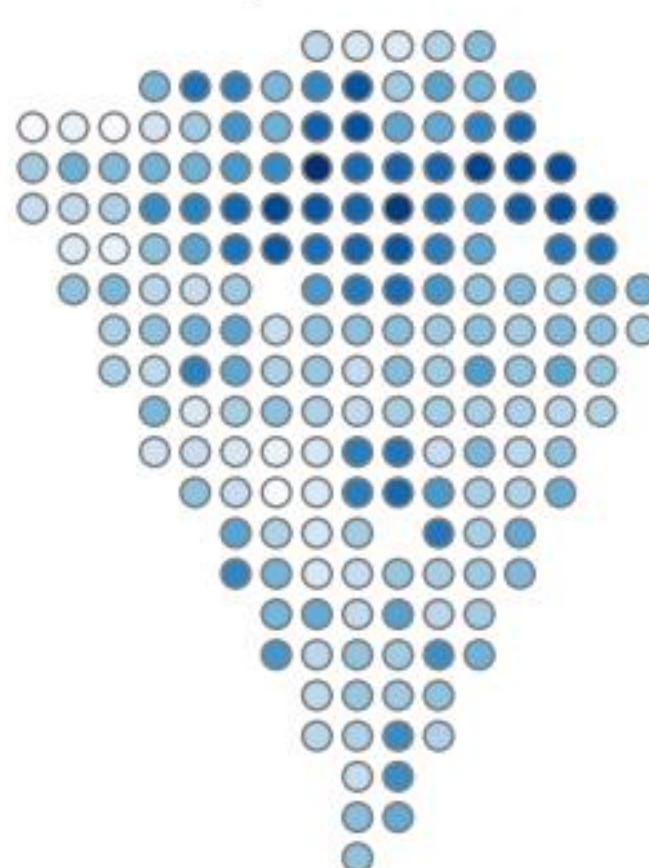

Myeloid

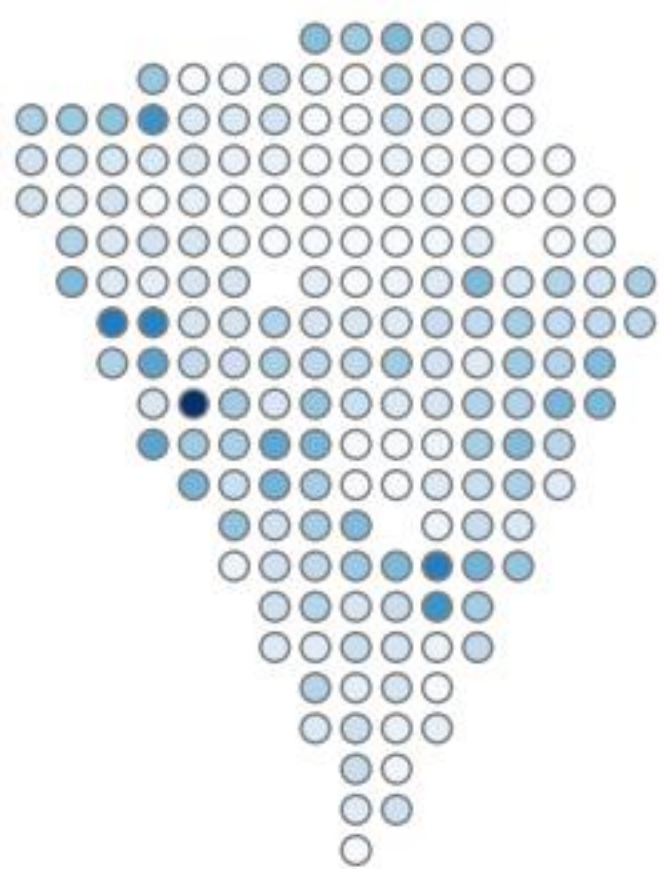

Plasma Cells

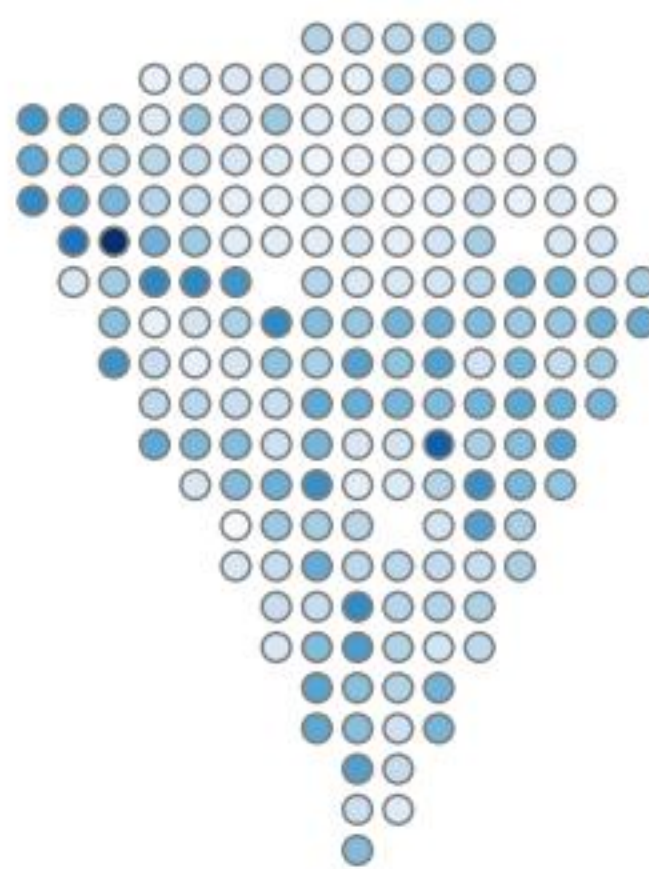

PVL

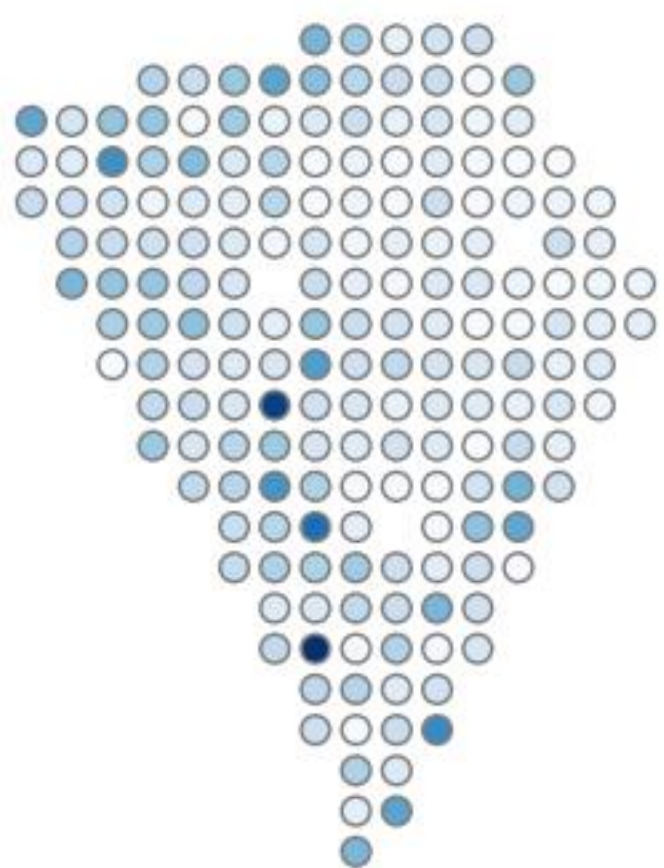

T-cells

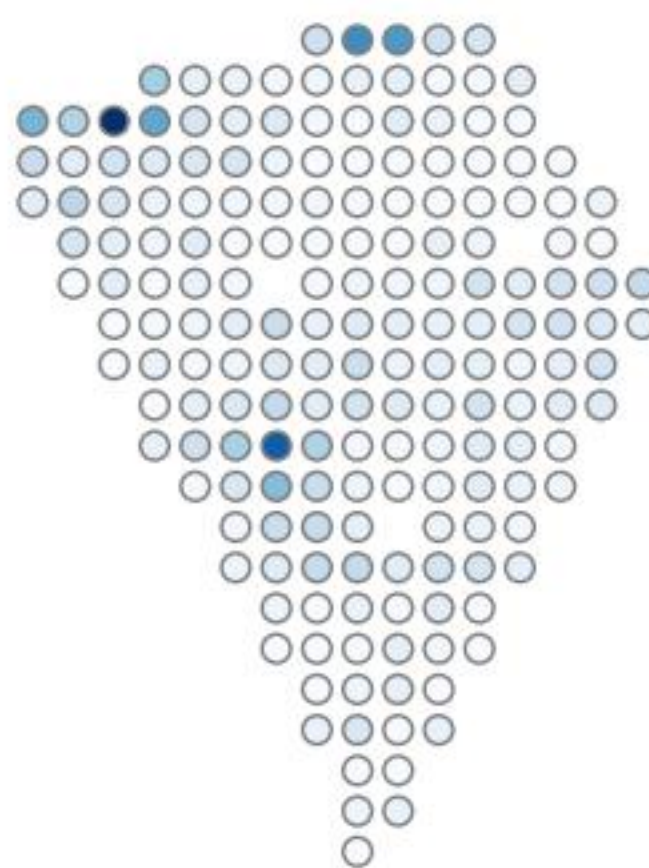

# major\_D6

B-cells

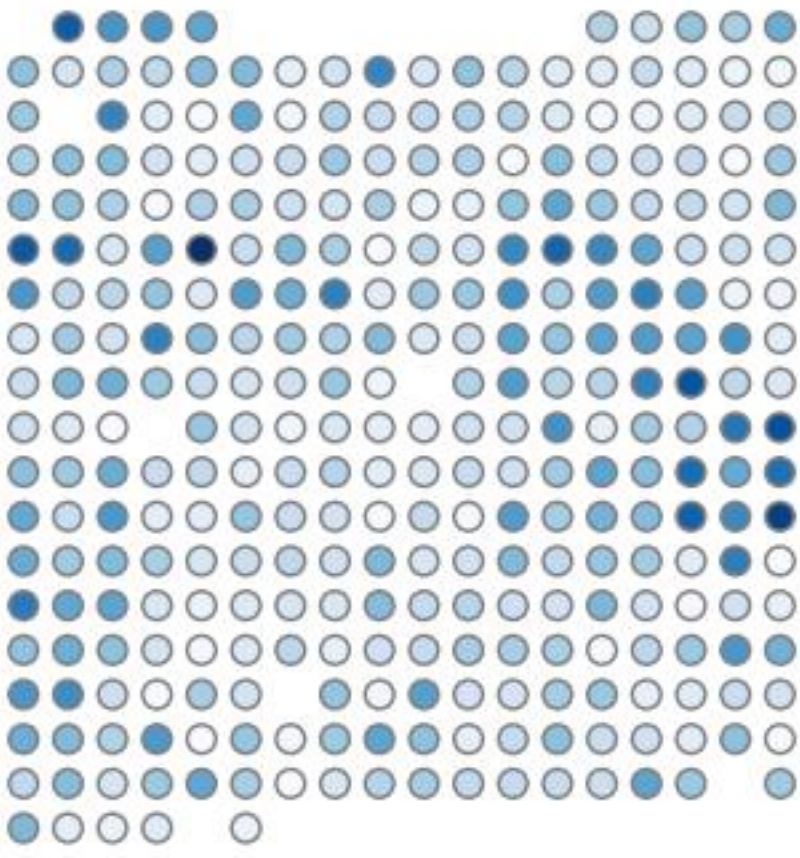

CAFs

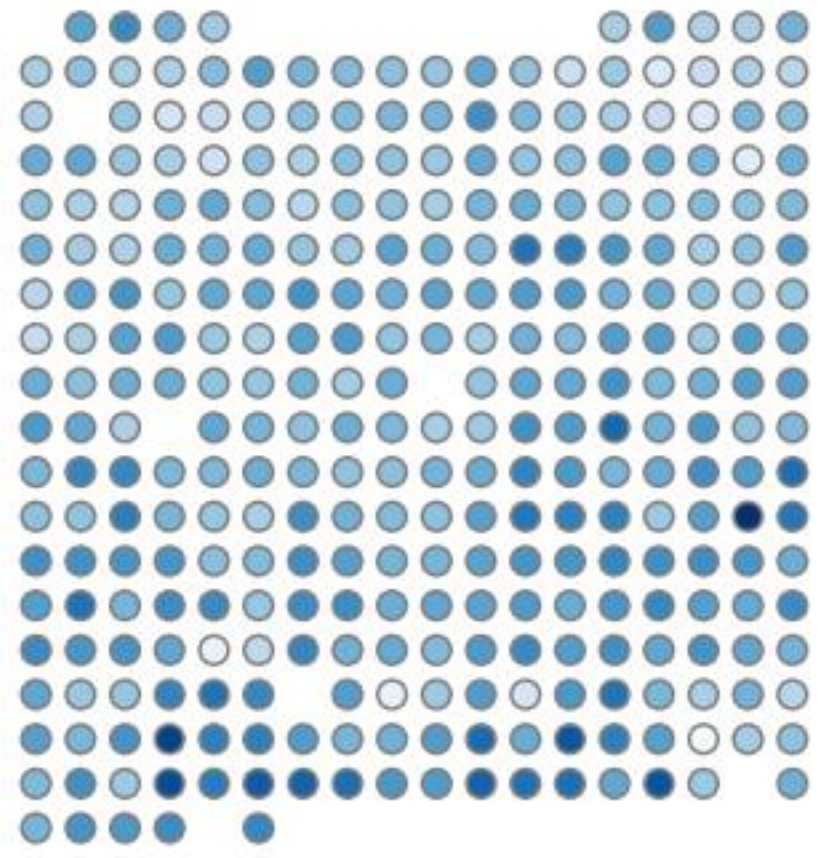

Endothelial

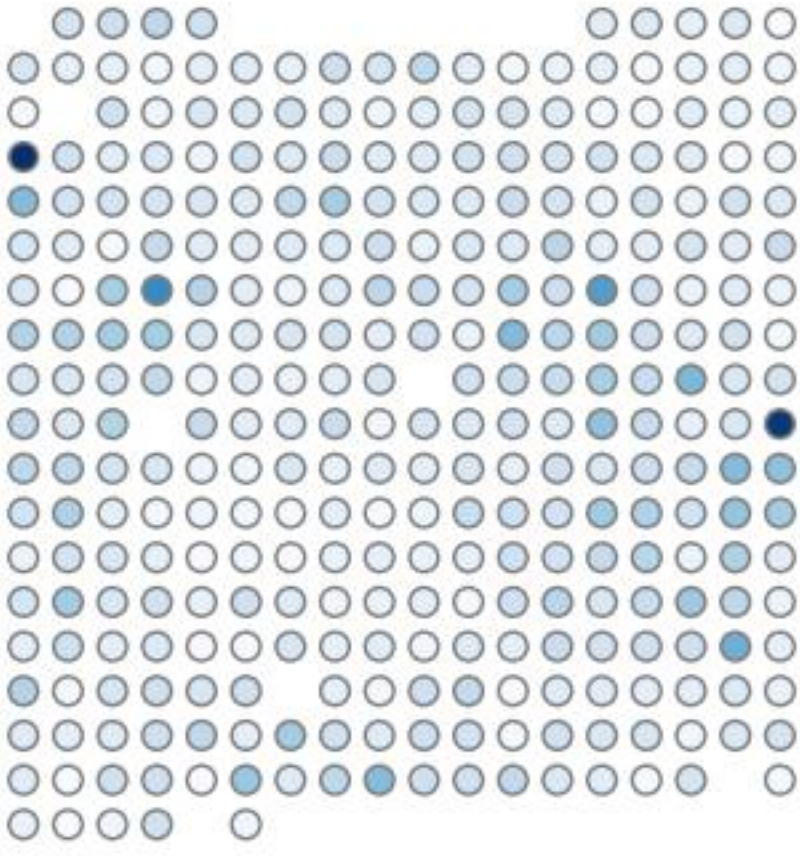

Epithelial

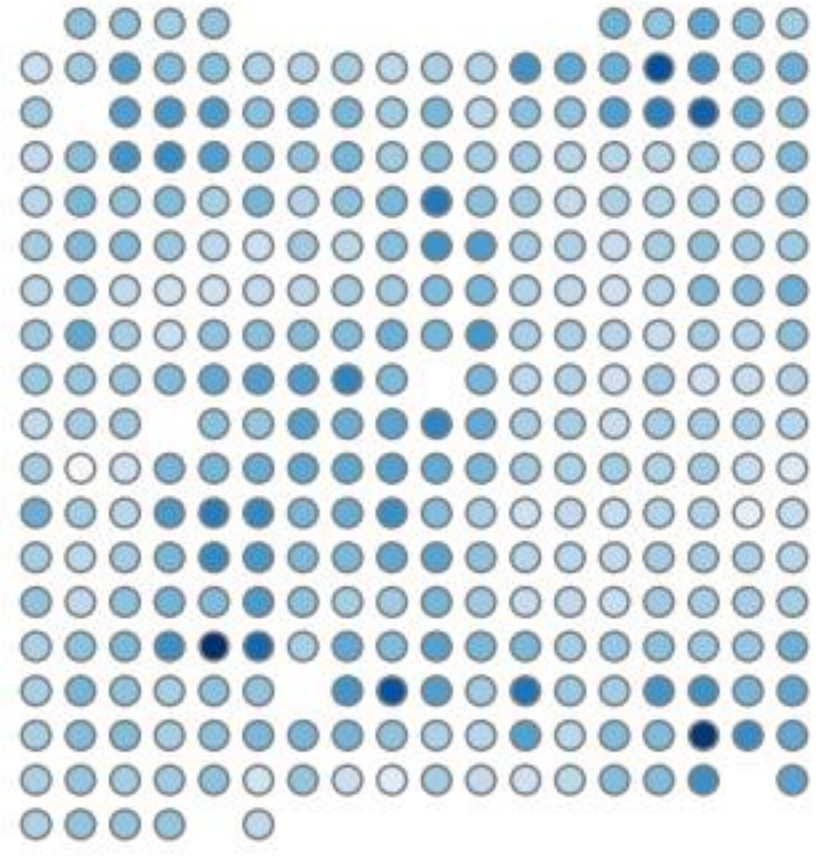

Myeloid

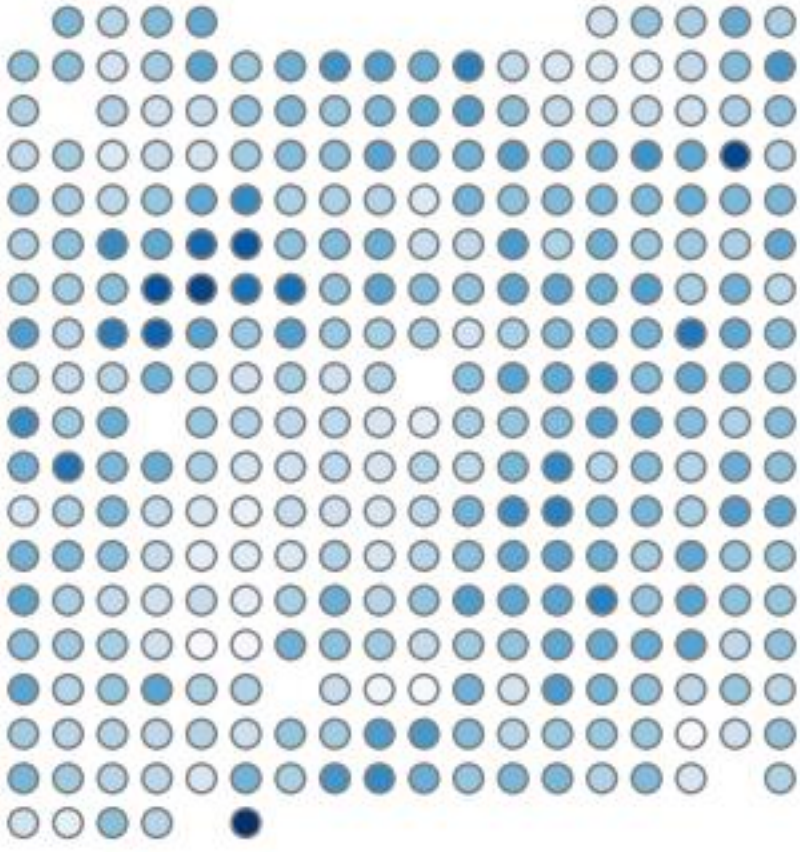

Plasma Cells

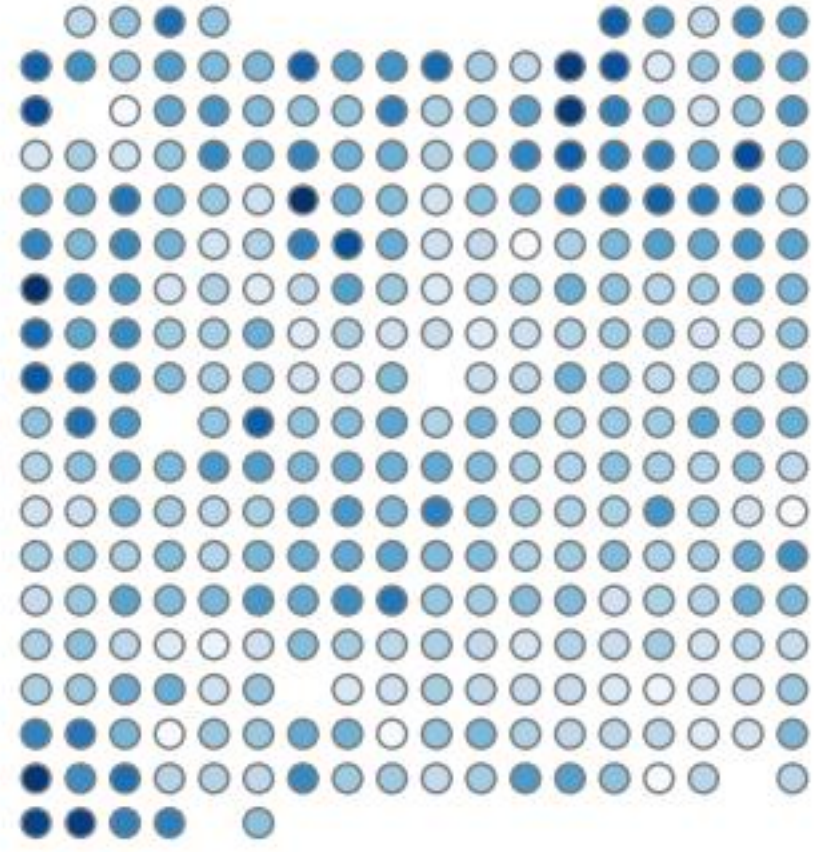

PVL

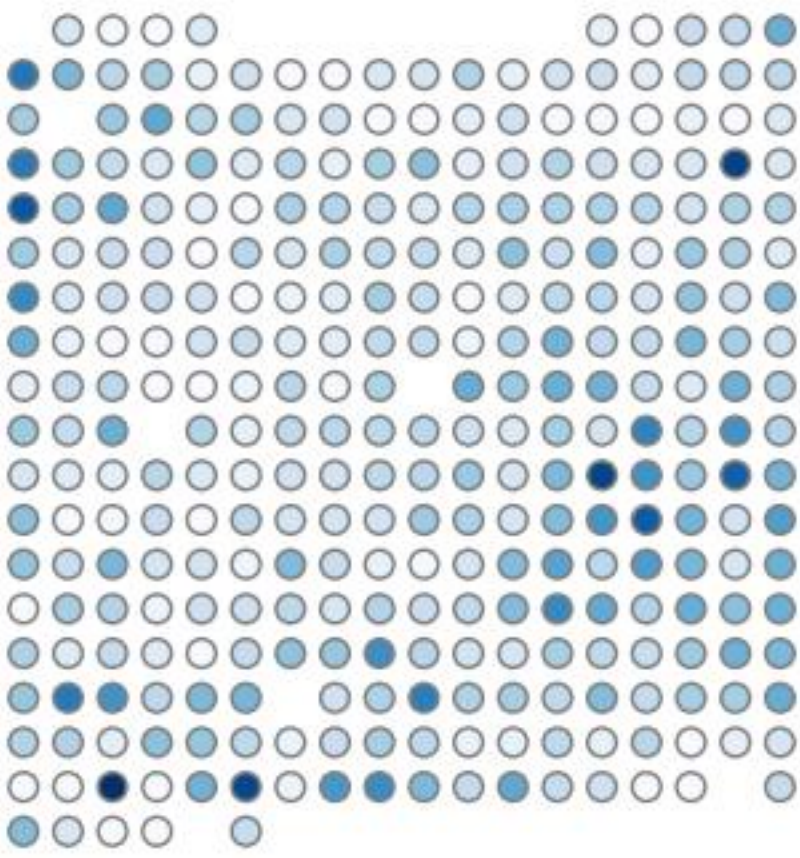

T-cells

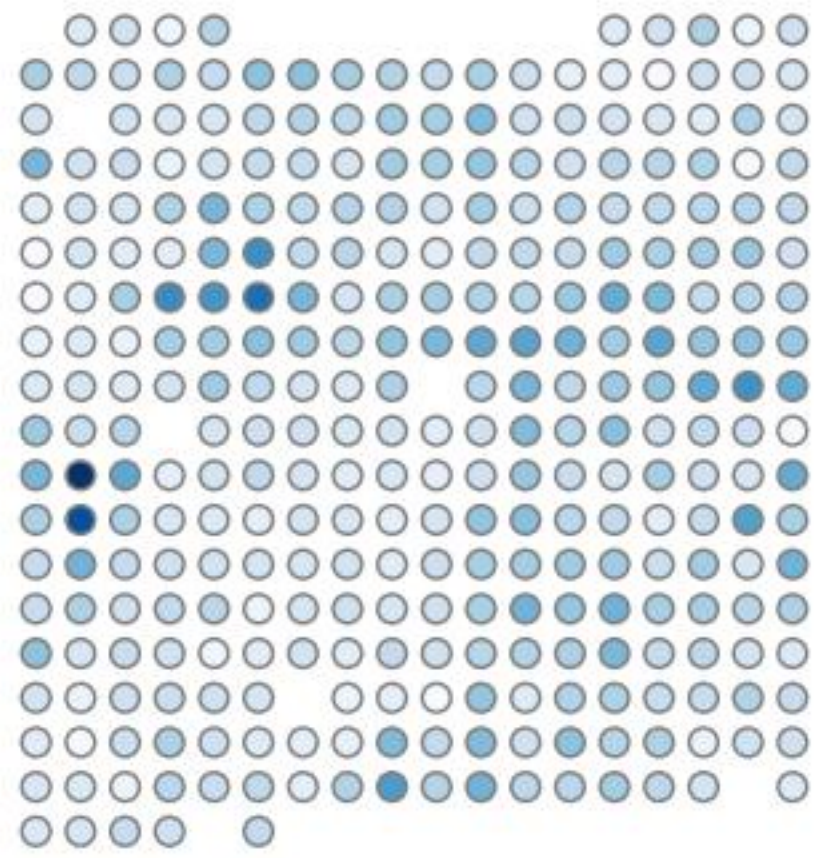

# major\_C3

B-cells

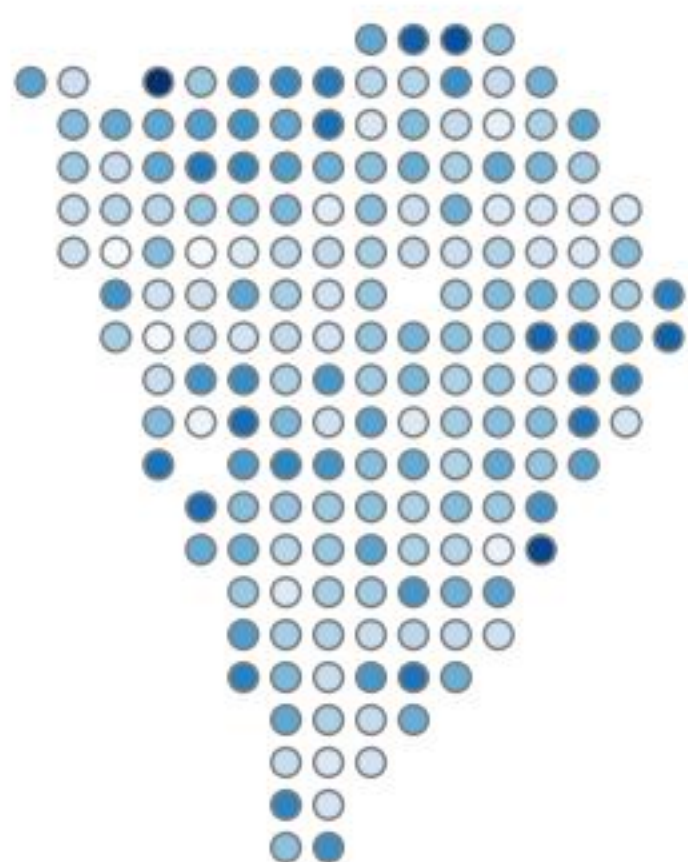

CAFs

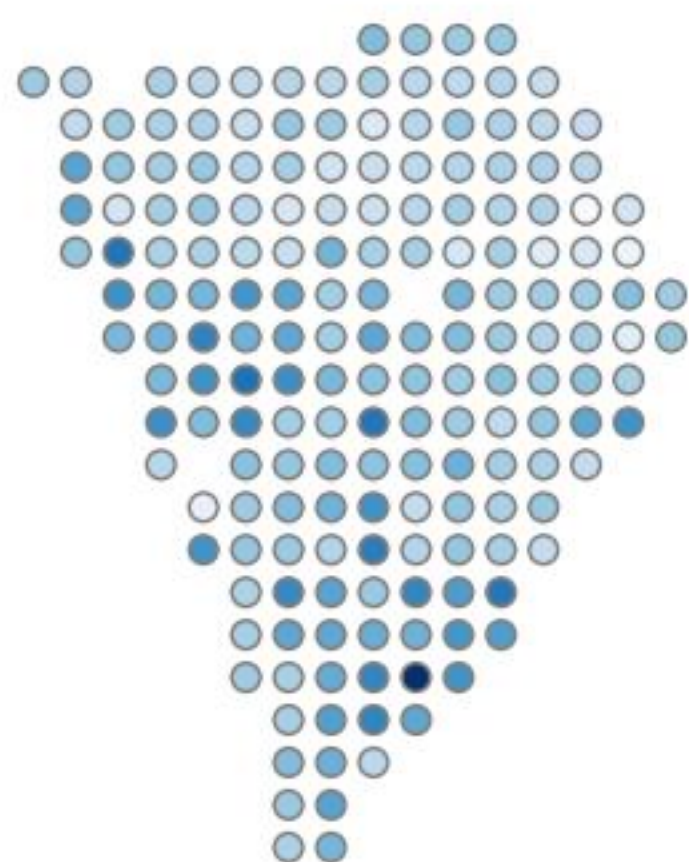

Endothelial

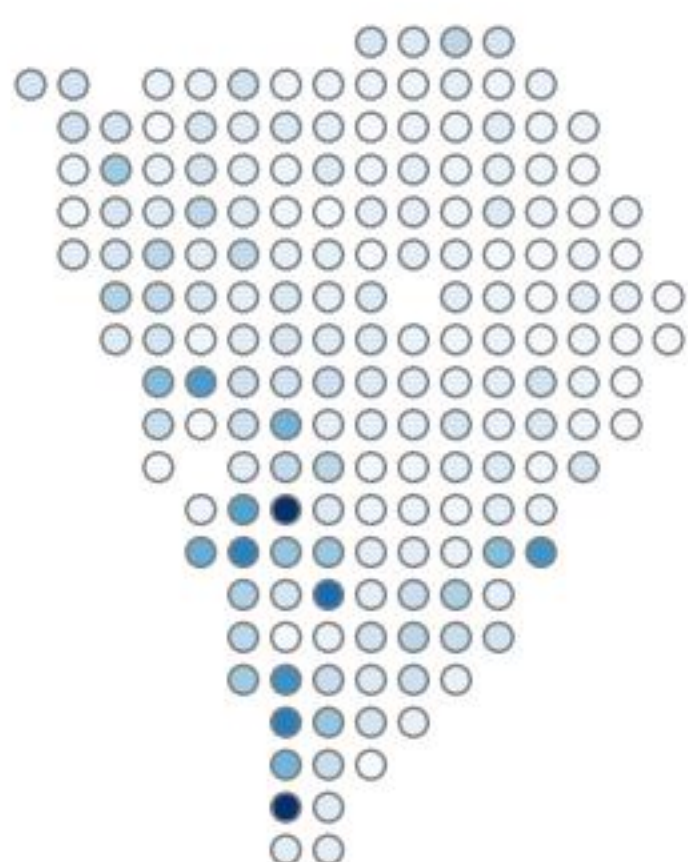

Epithelial

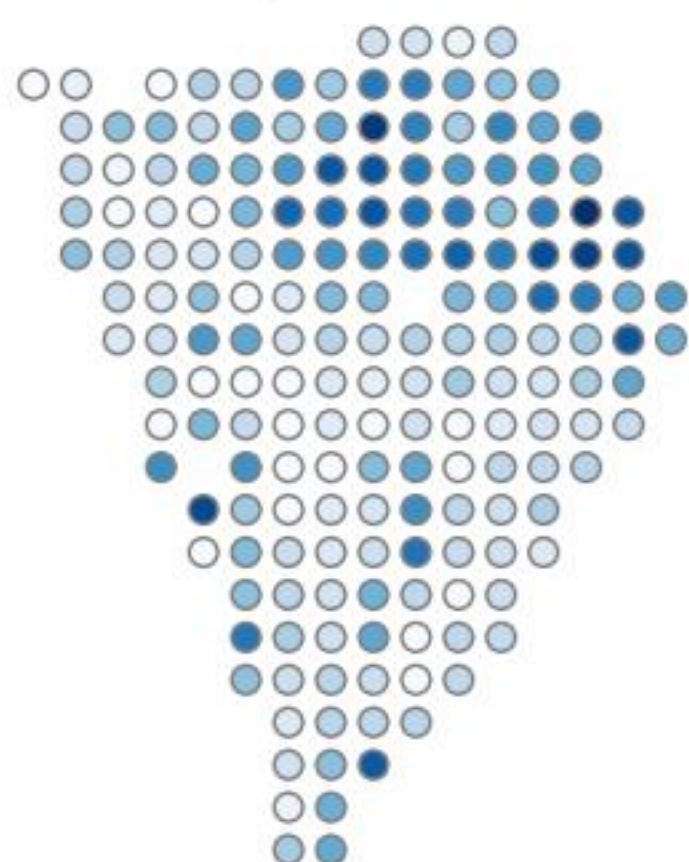

Myeloid

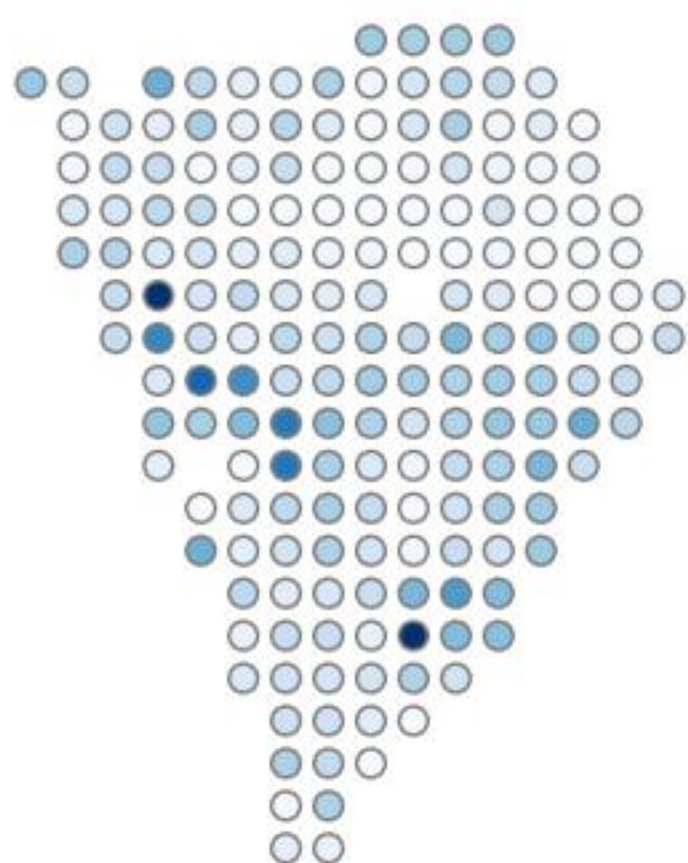

Plasma Cells

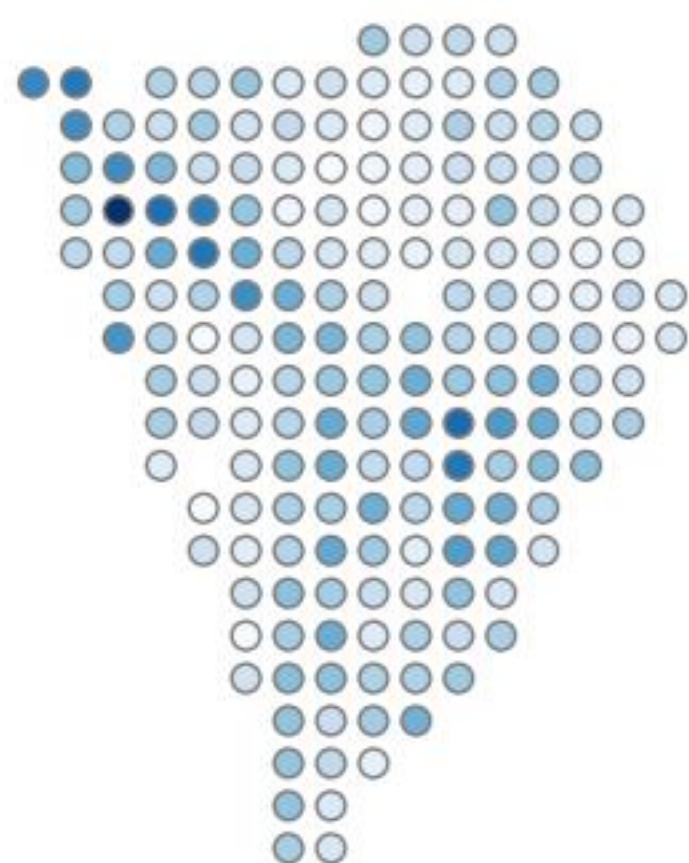

PVL

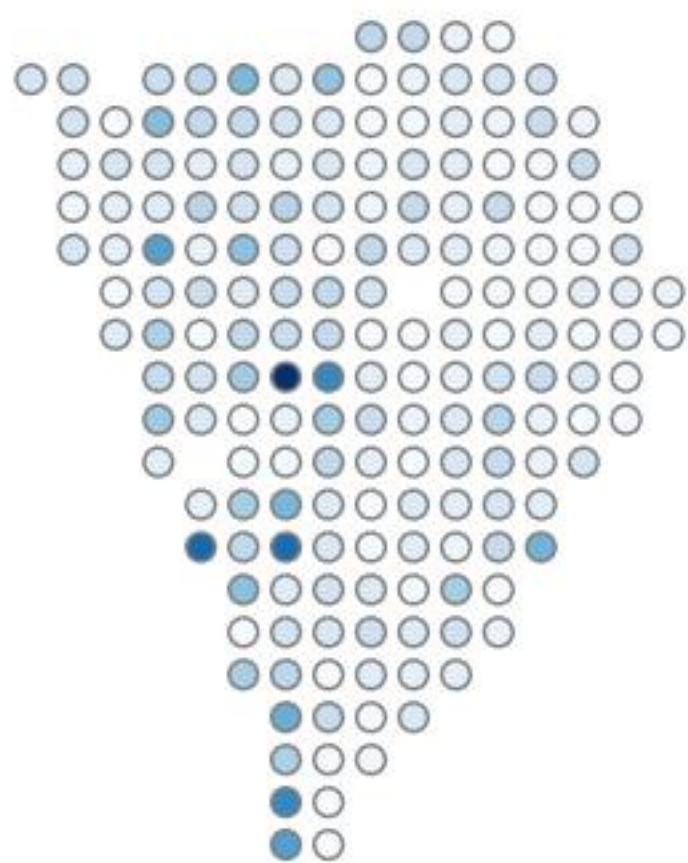

T-cells

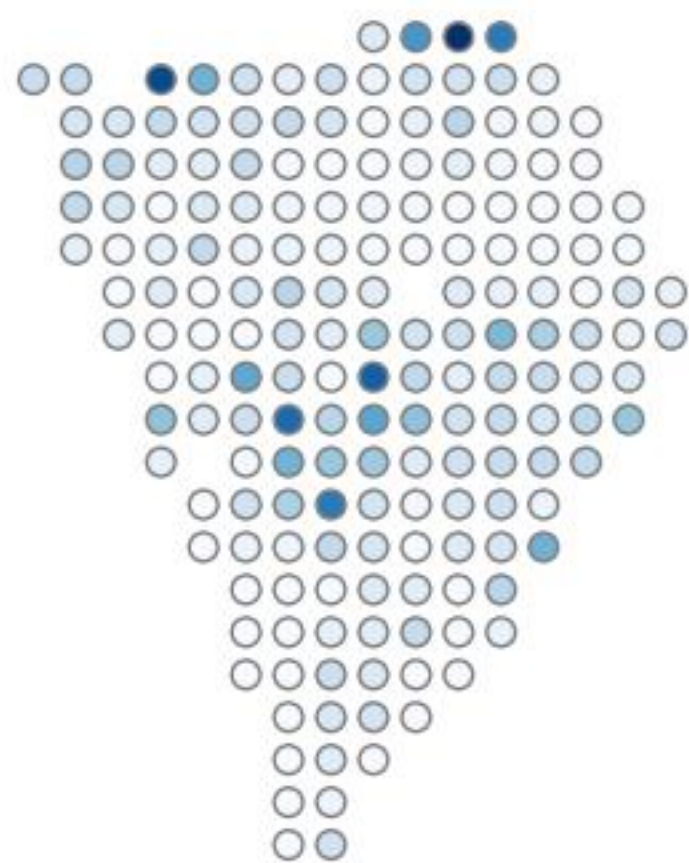



# major\_A4

B-cells

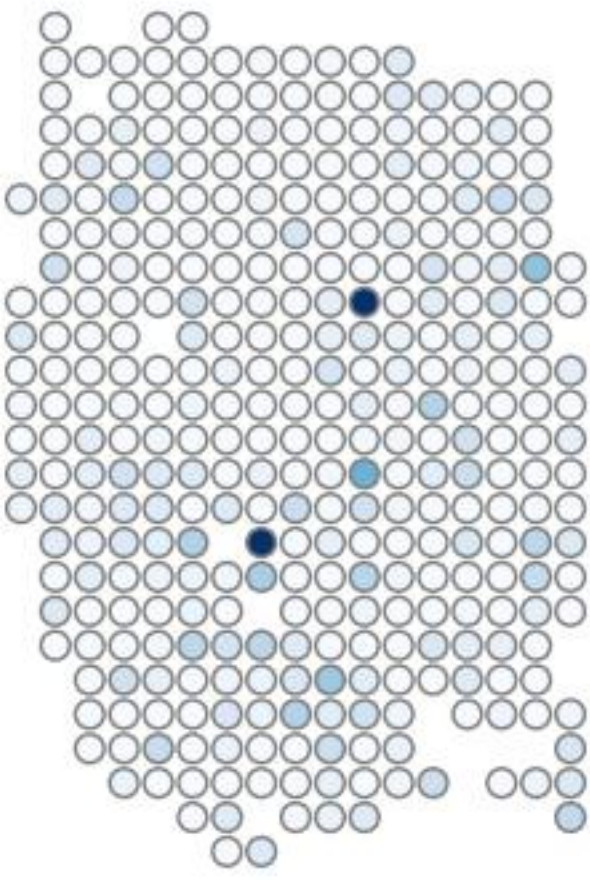

CAFs

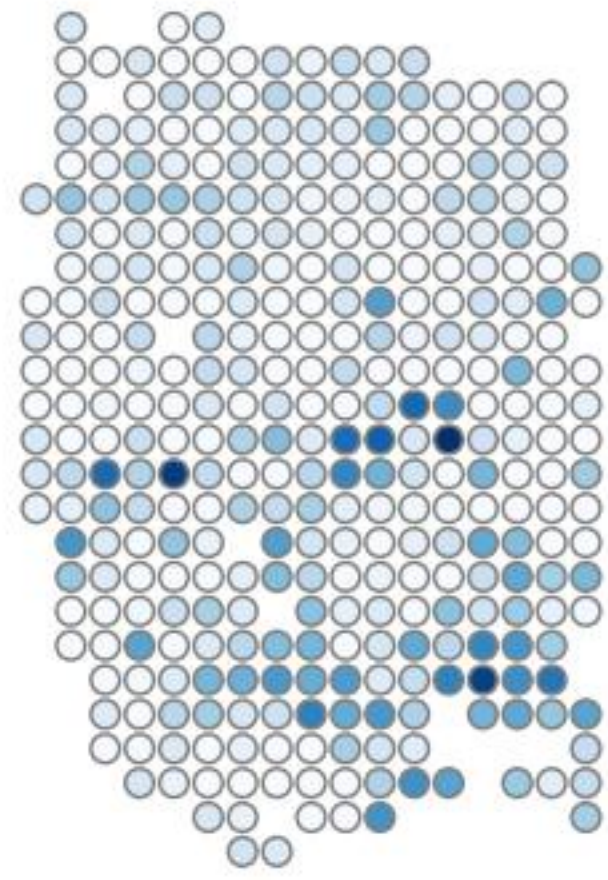

Endothelial

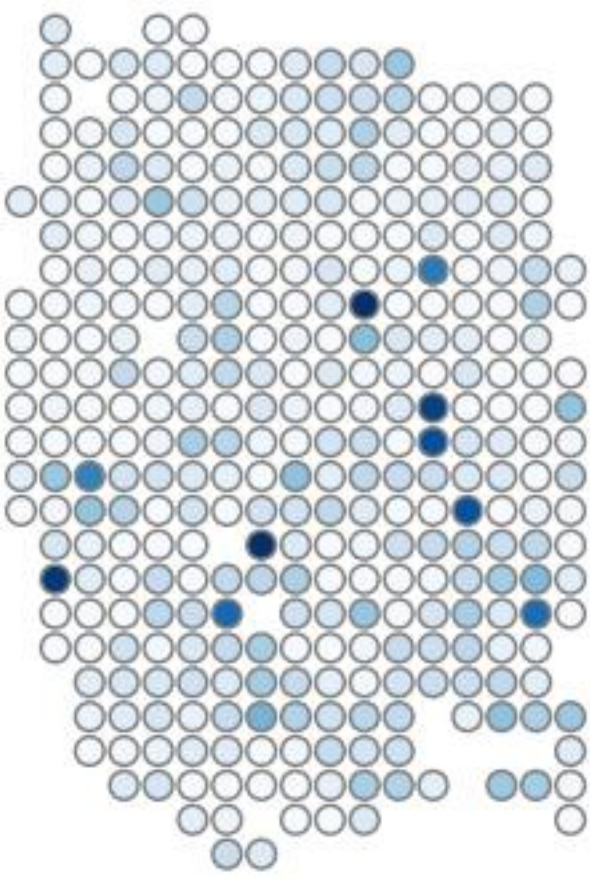

Epithelial

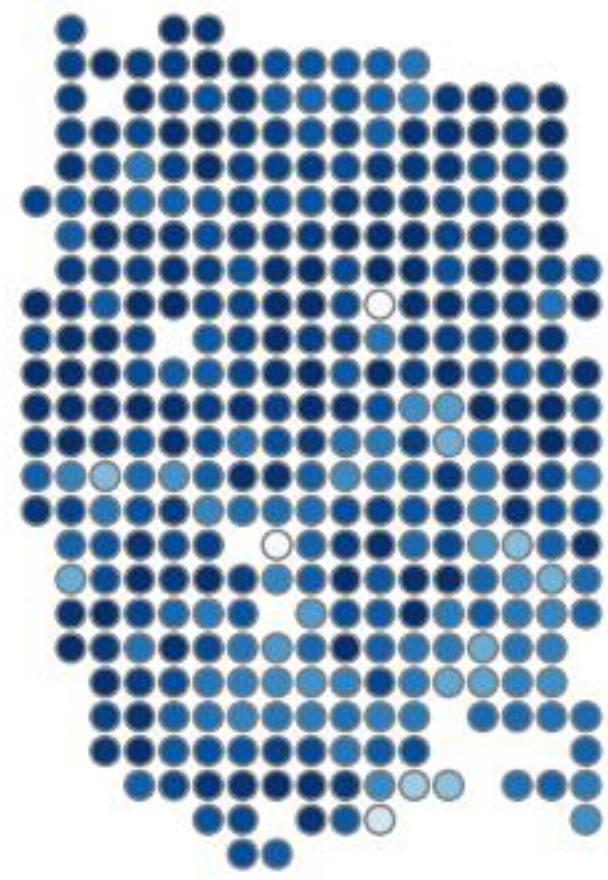

Myeloid

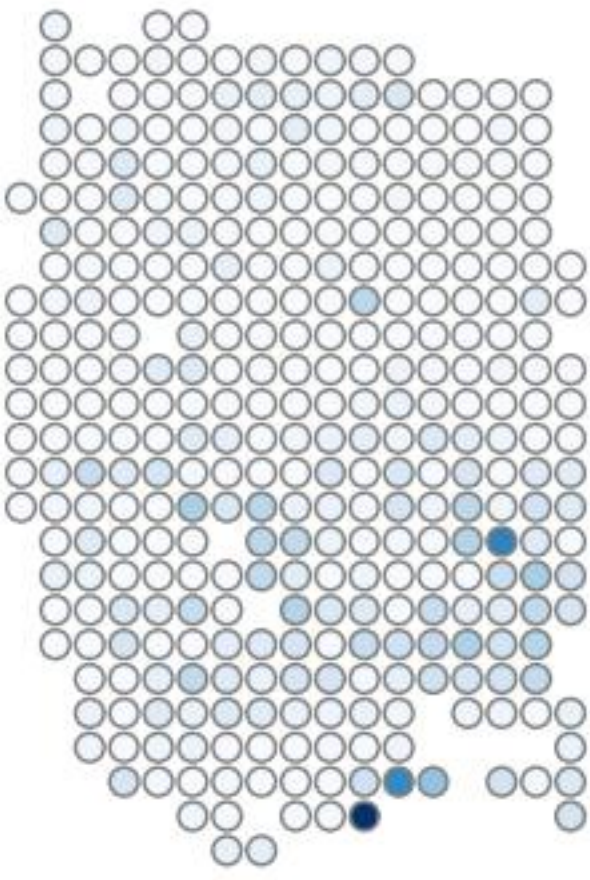

Plasma Cells

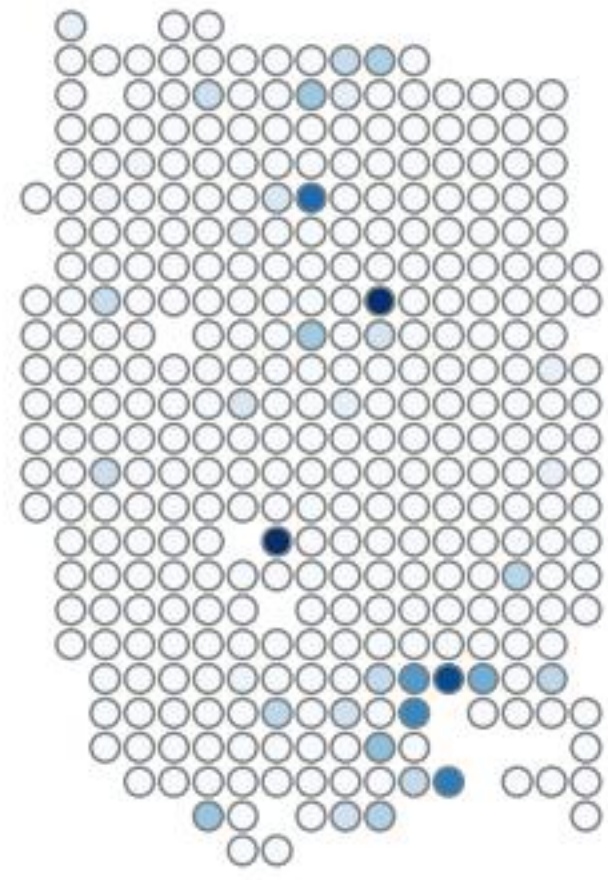

PVL

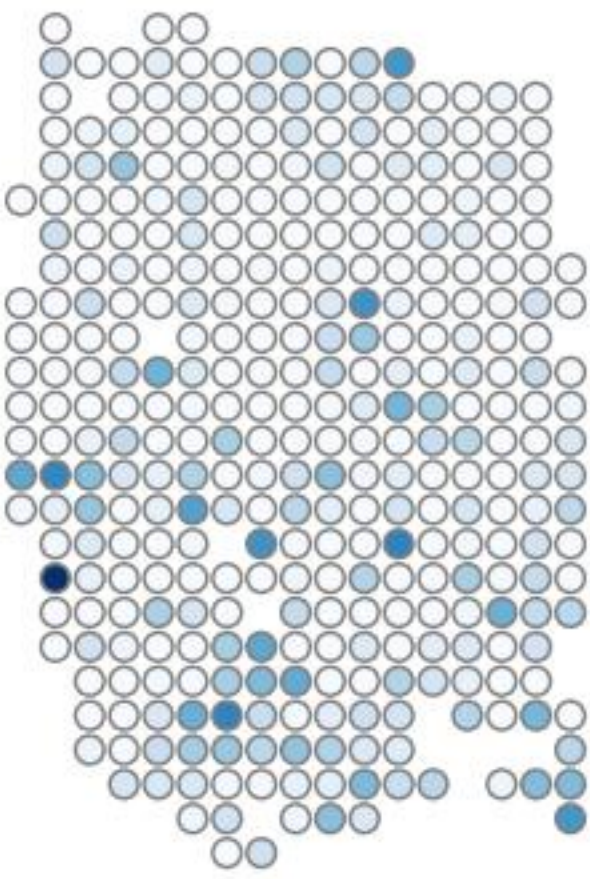

T-cells

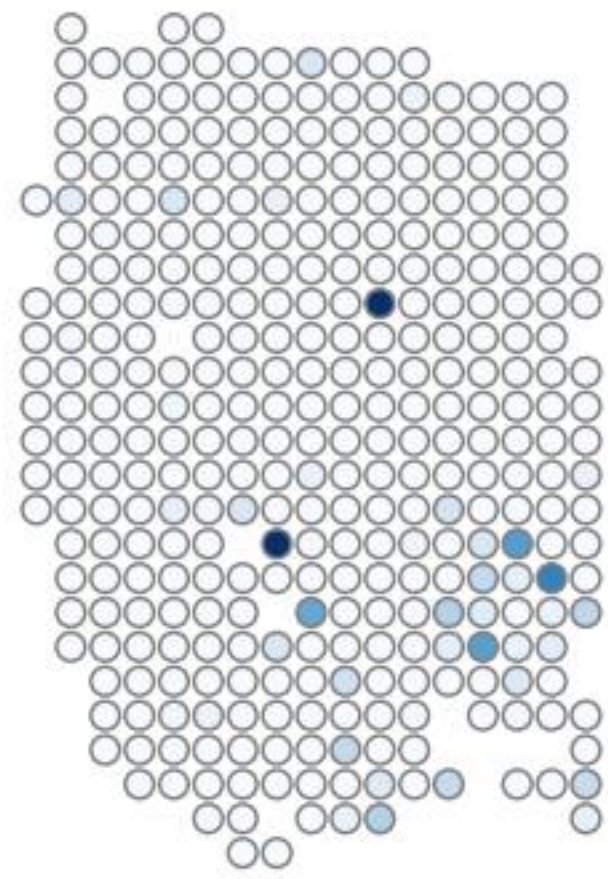

# major\_B2

B-cells

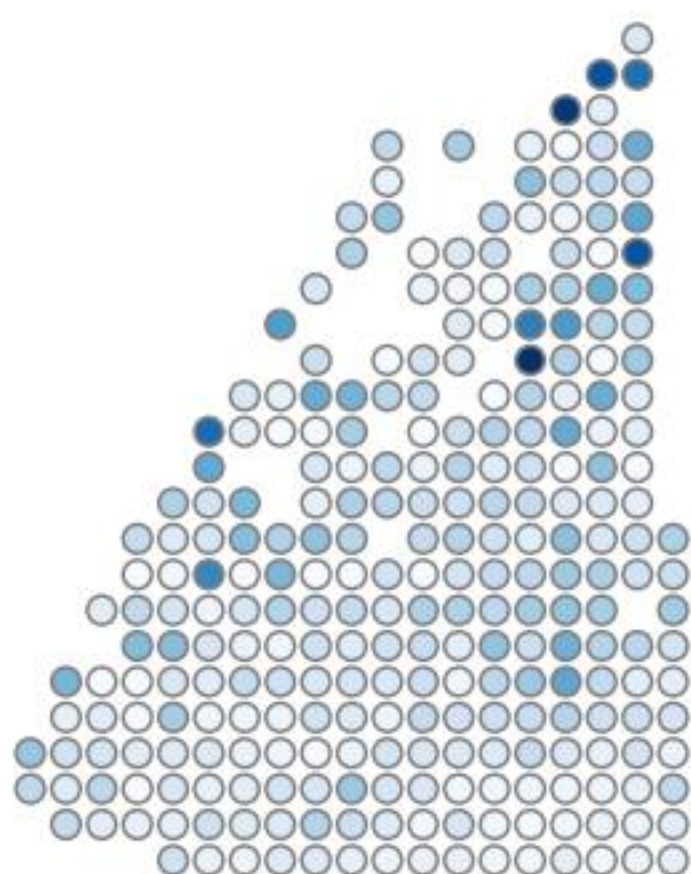

CAFs

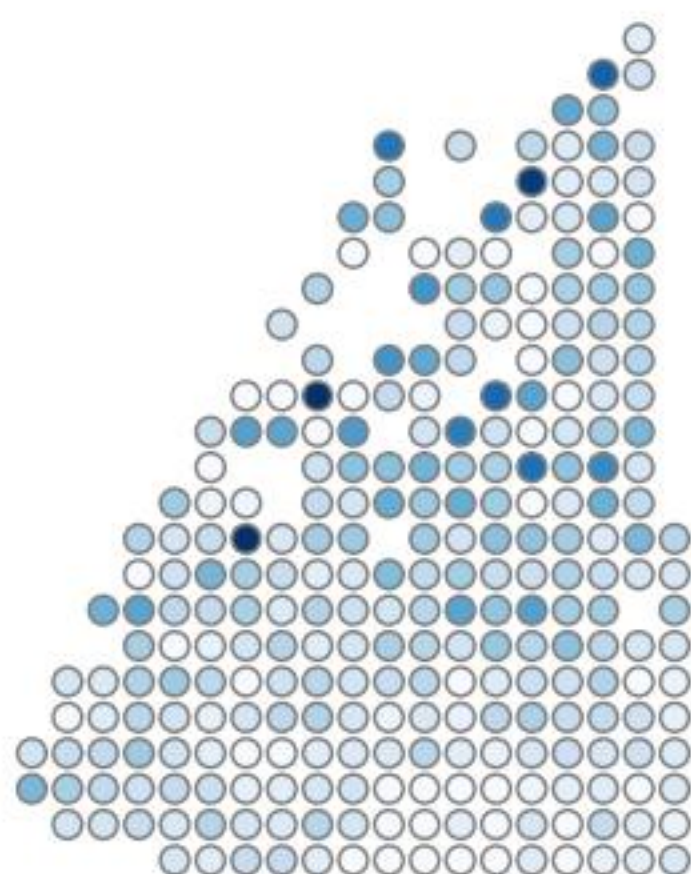

Endothelial

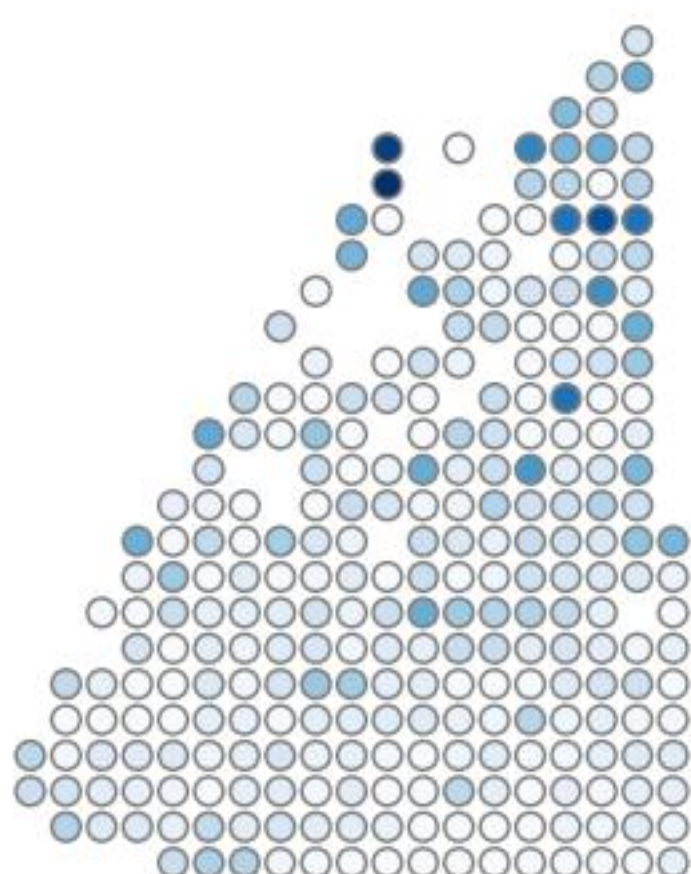

Epithelial

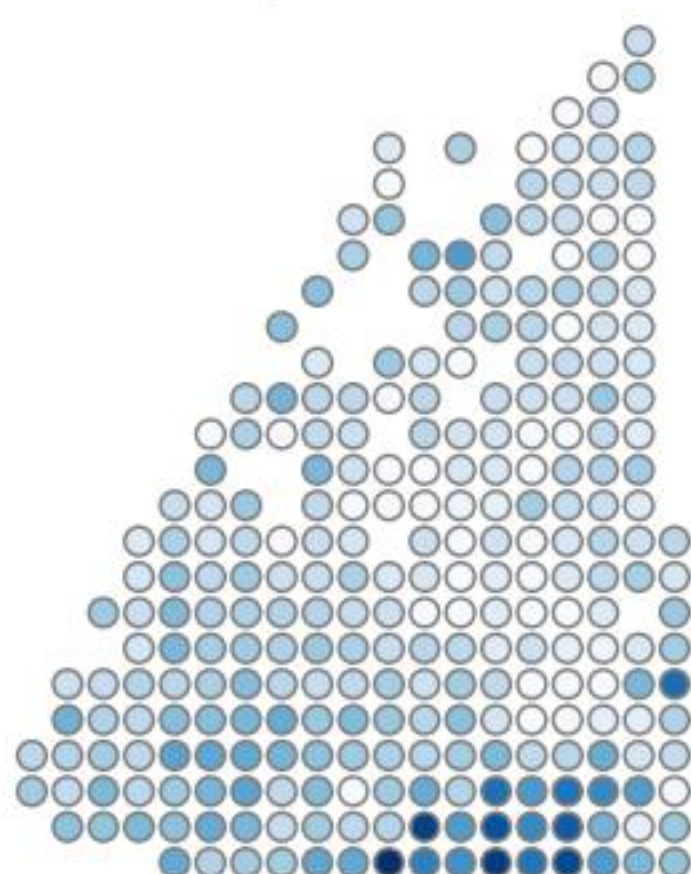

Myeloid

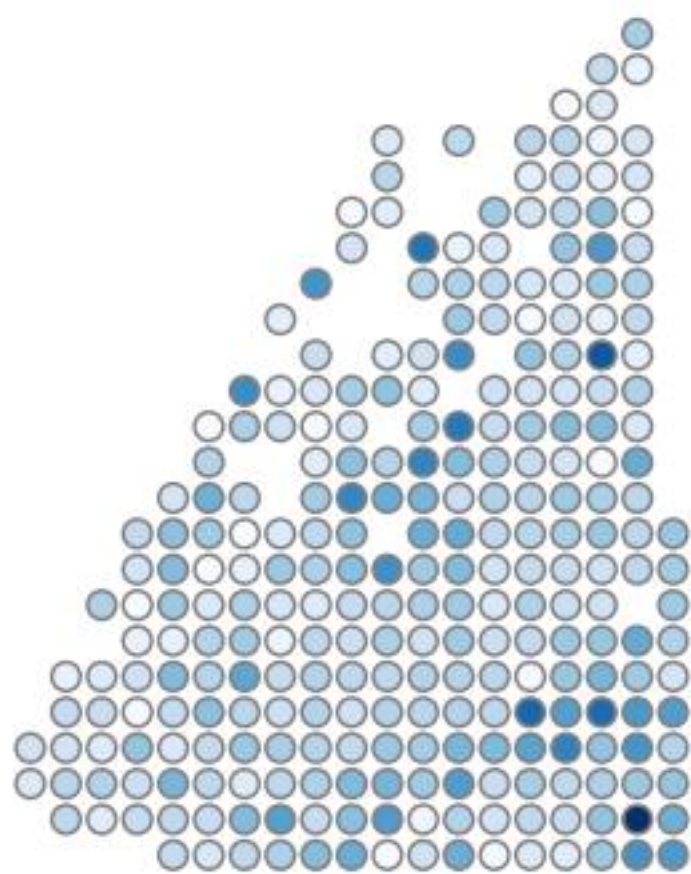

Plasma Cells

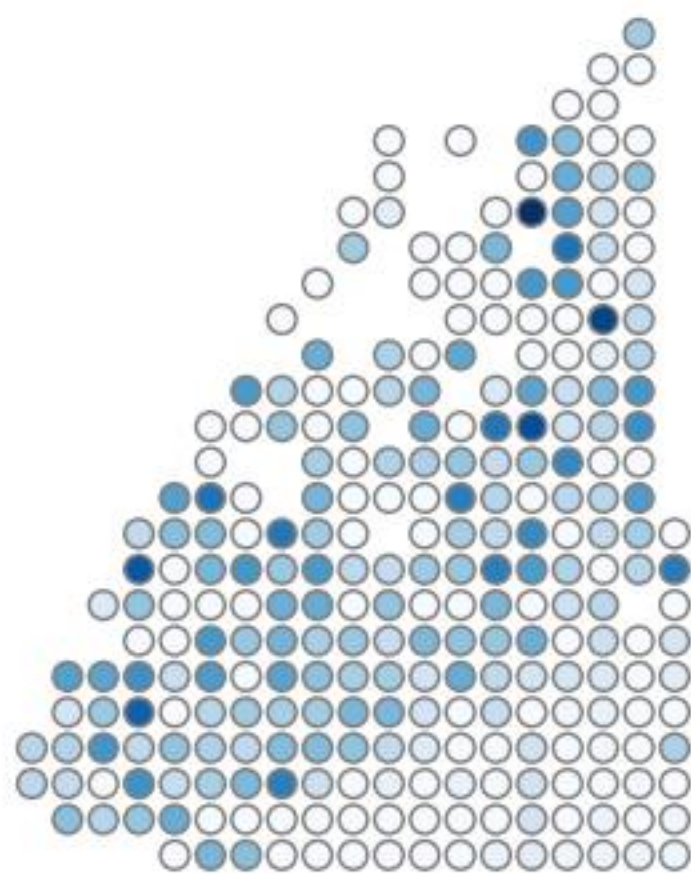

PVL

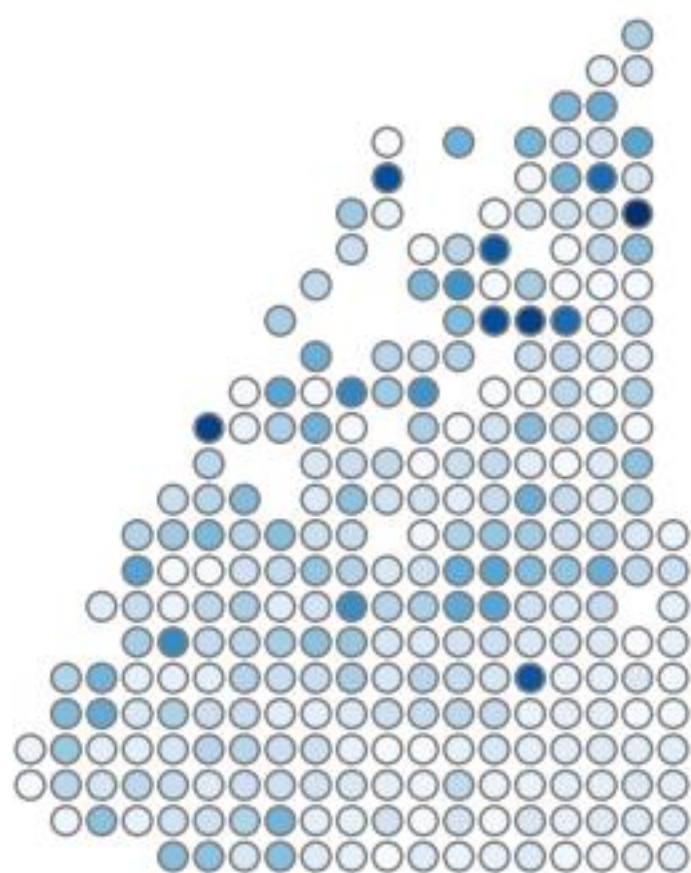

T-cells

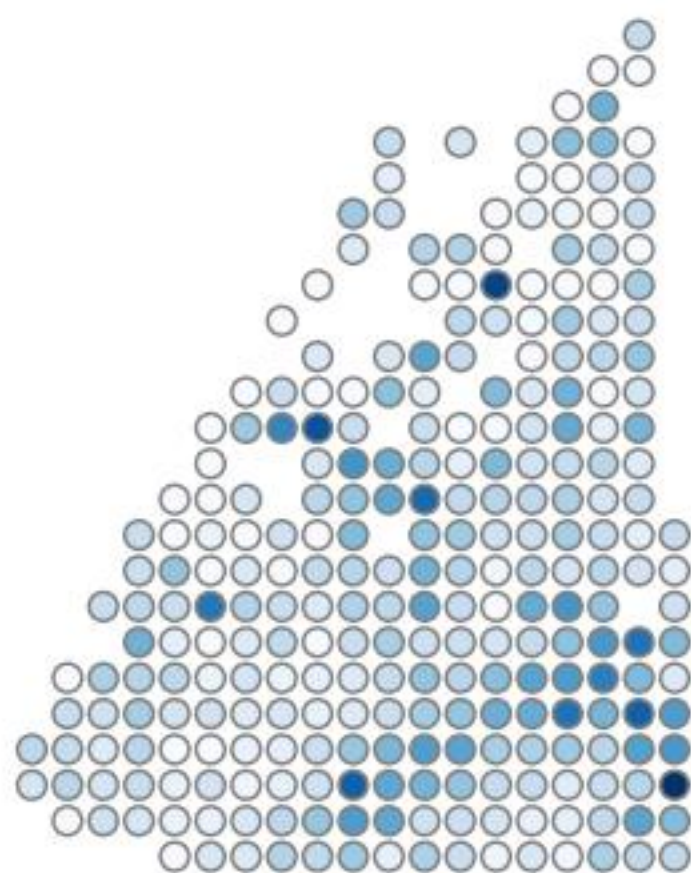

# major\_E1

B-cells

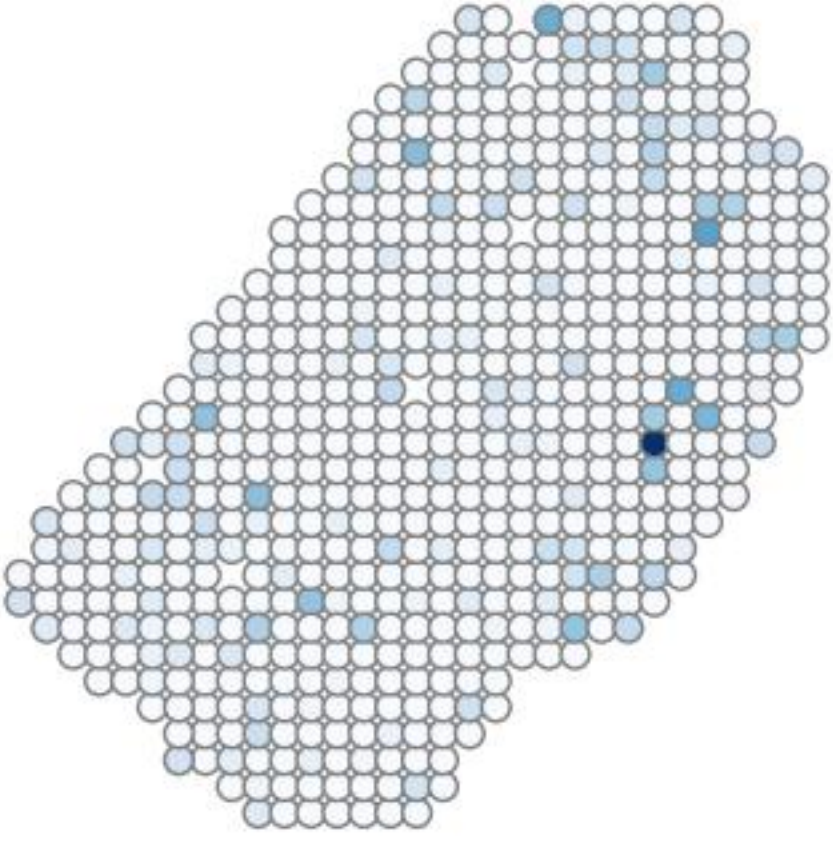

CAFs

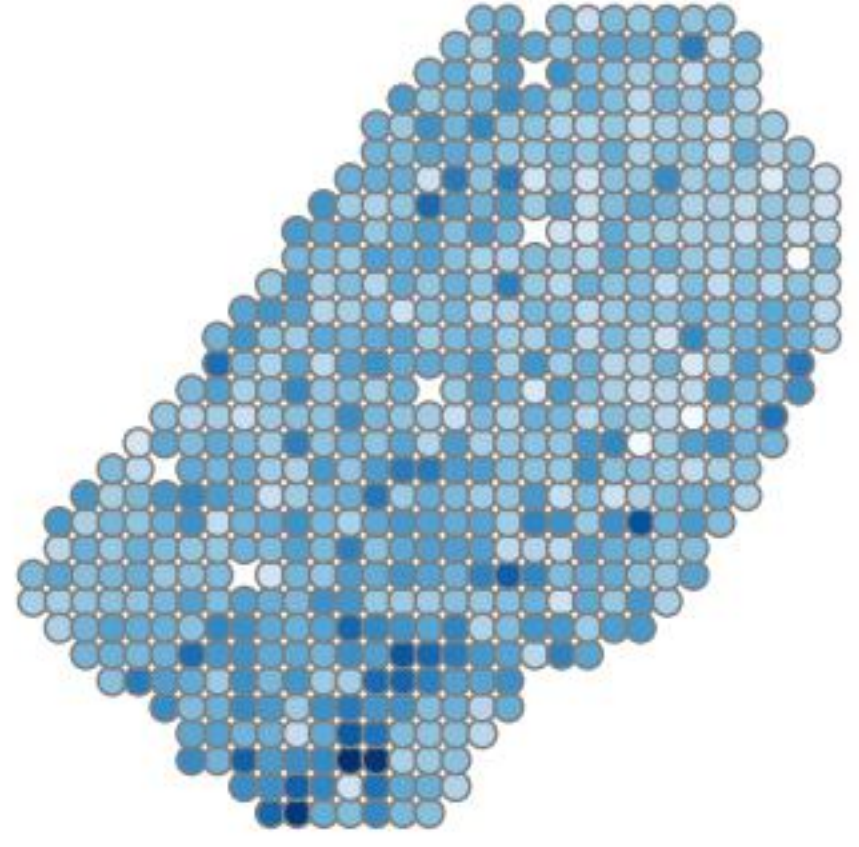

Endothelial

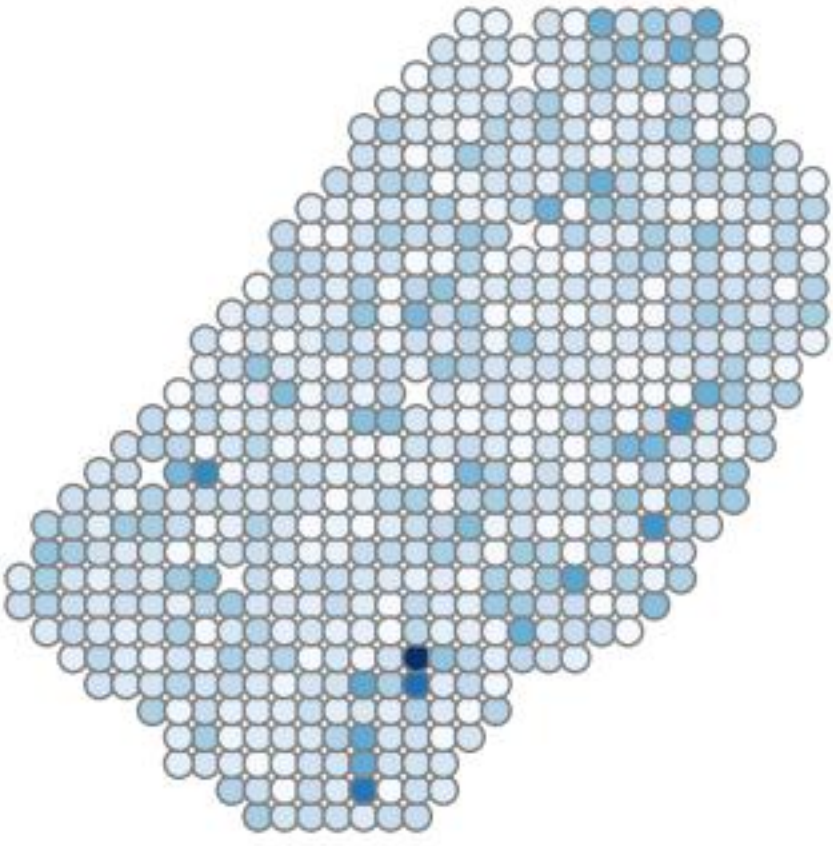

Epithelial

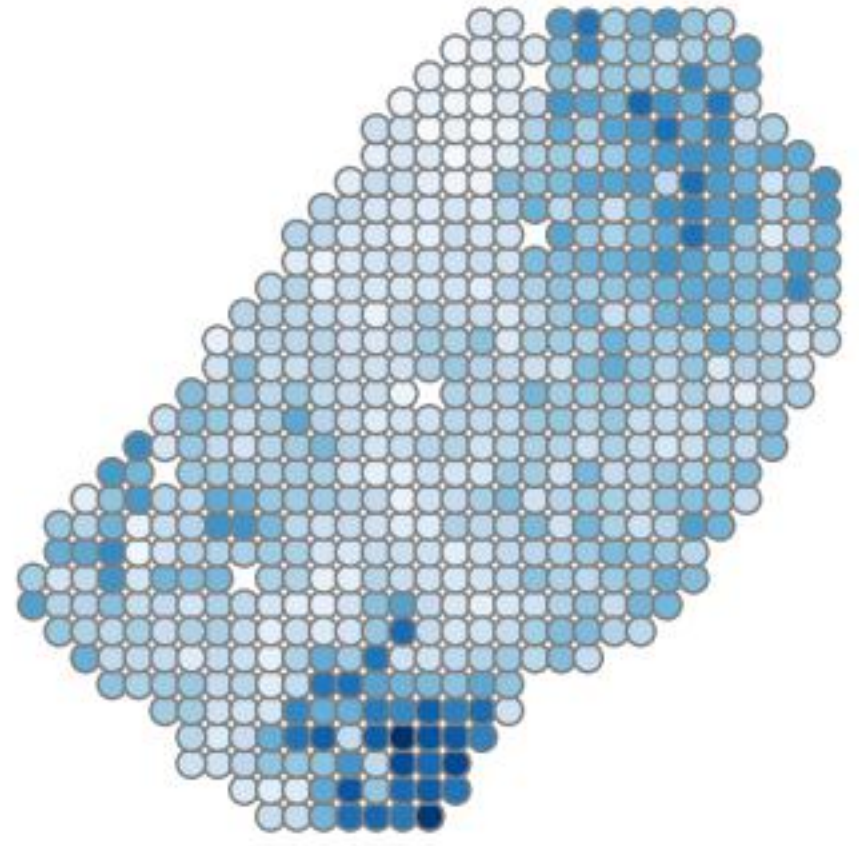

Myeloid

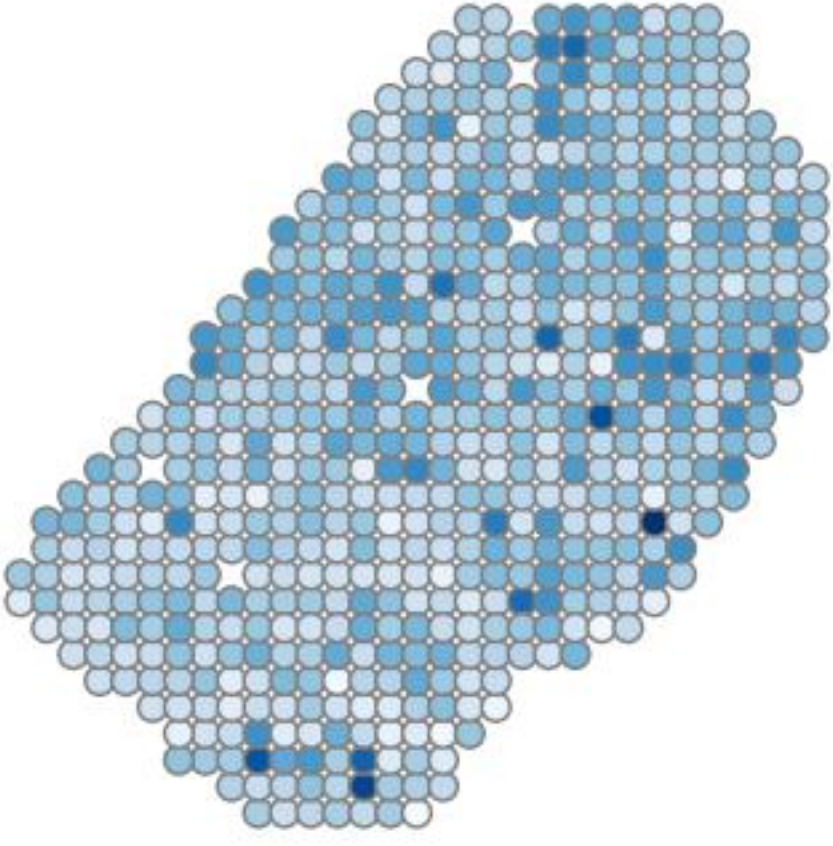

Plasma Cells

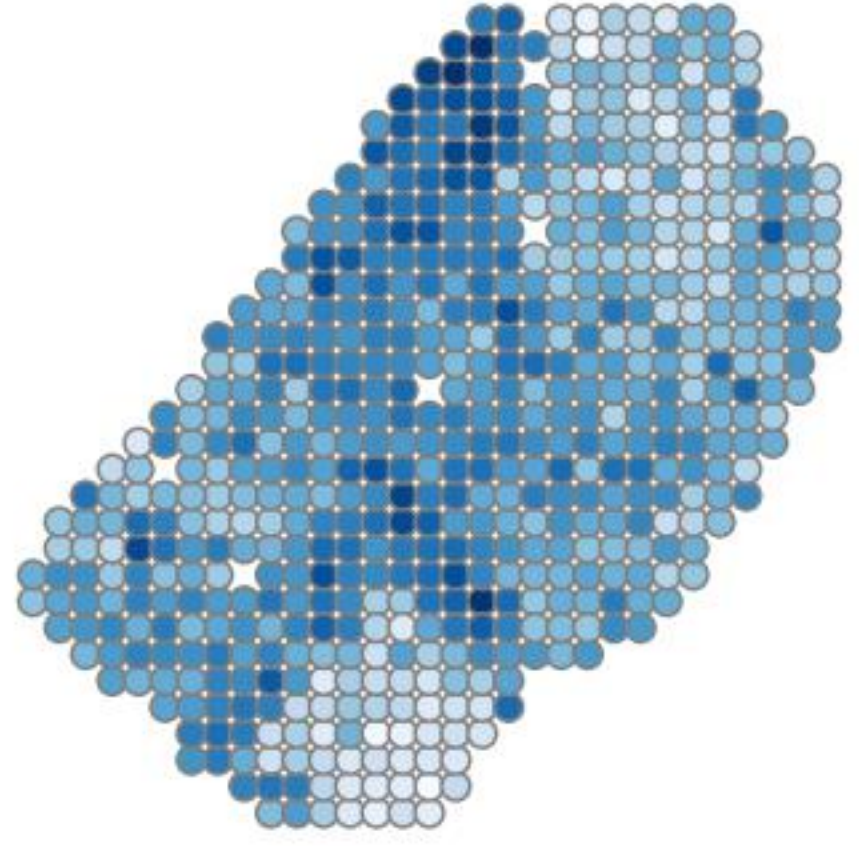

PVL

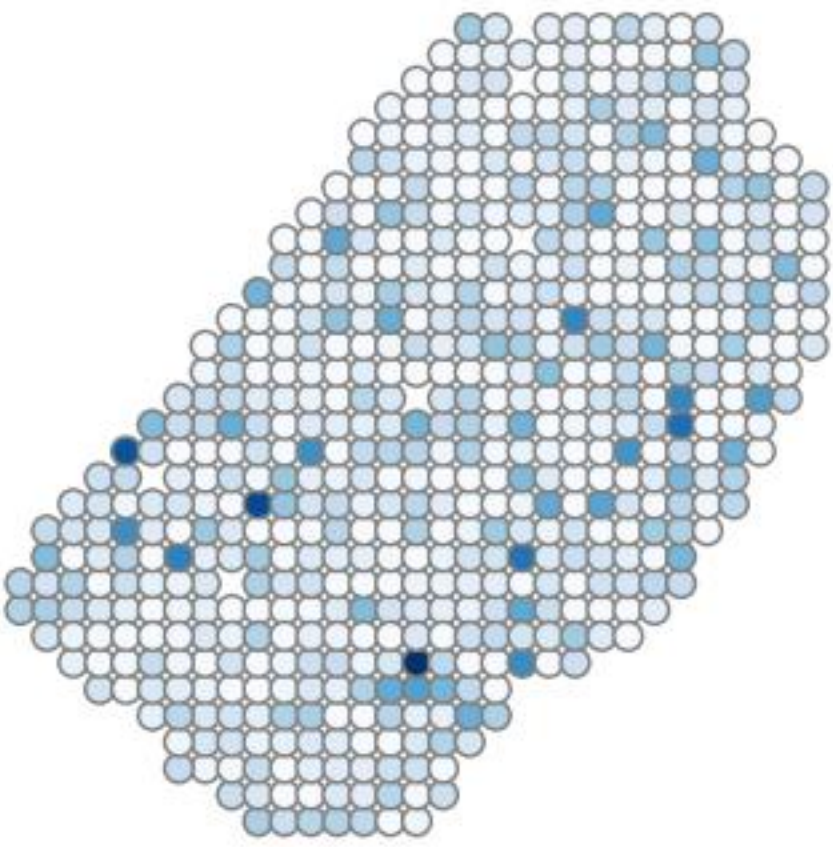

T-cells

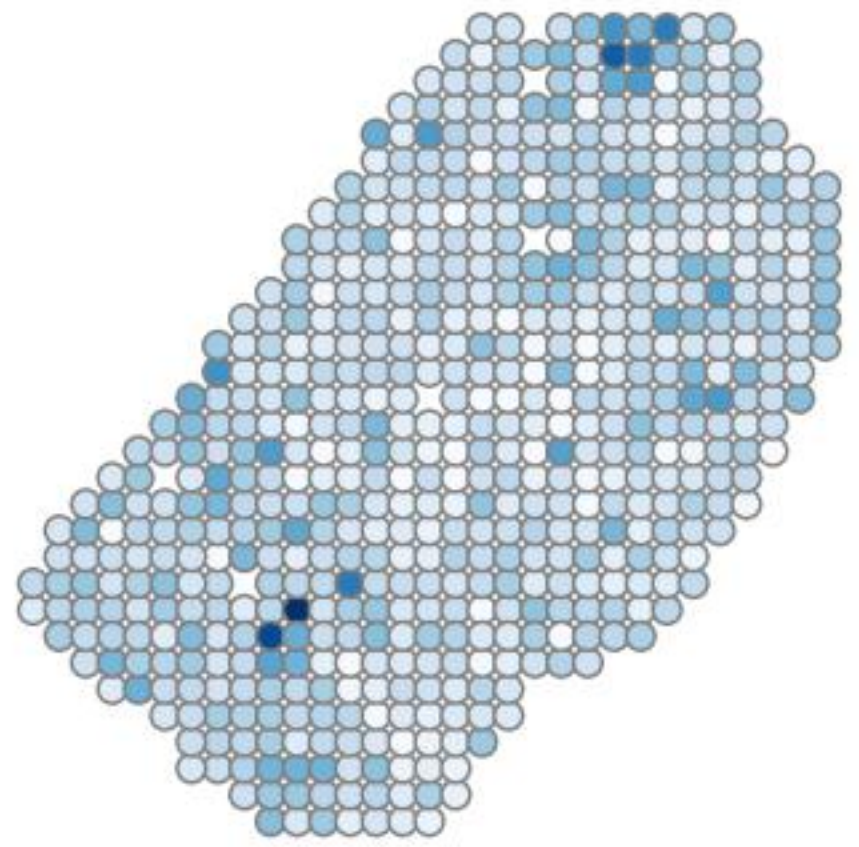

# major\_B3

B-cells

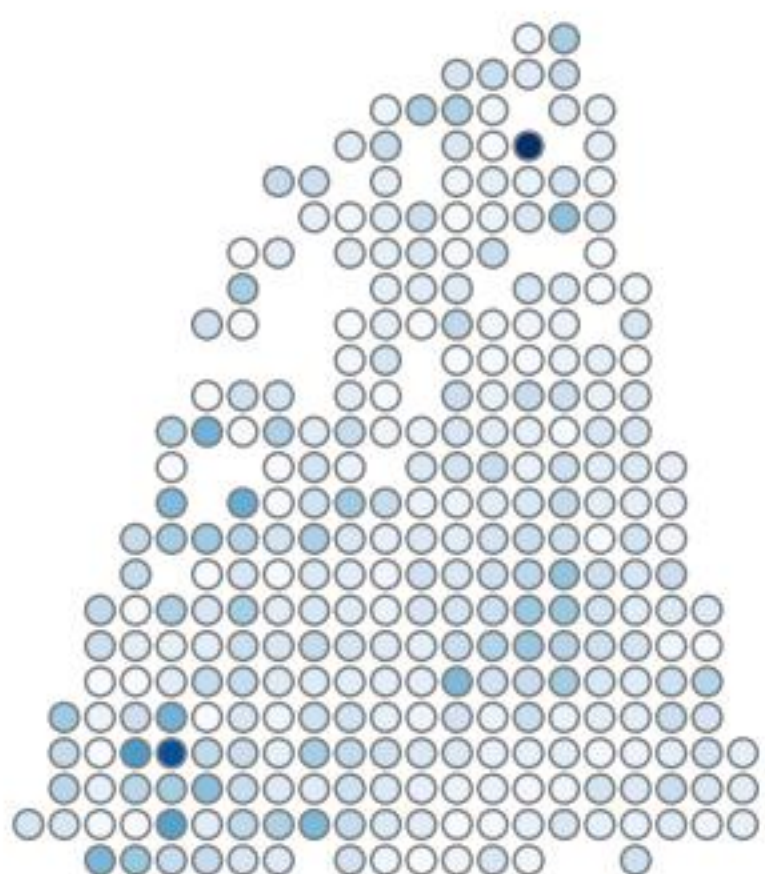

CAFs

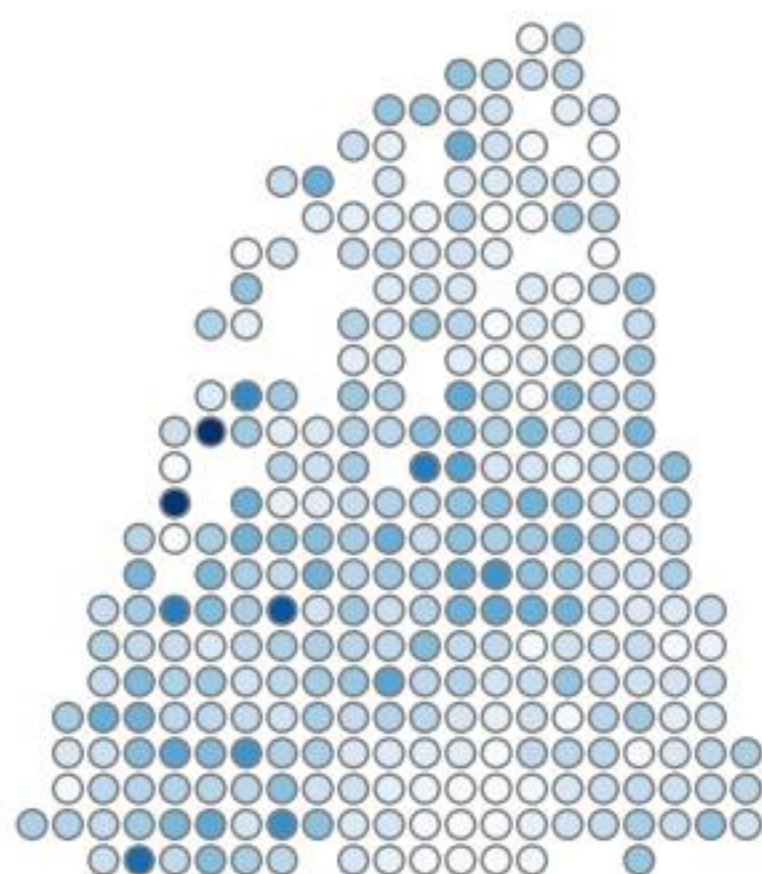

Endothelial

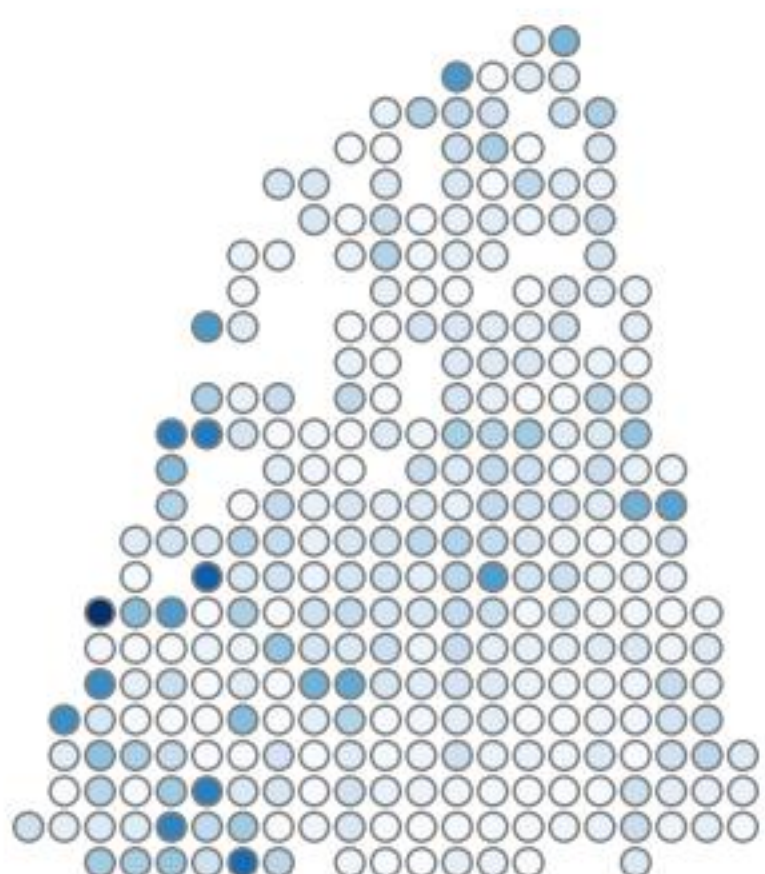

Epithelial

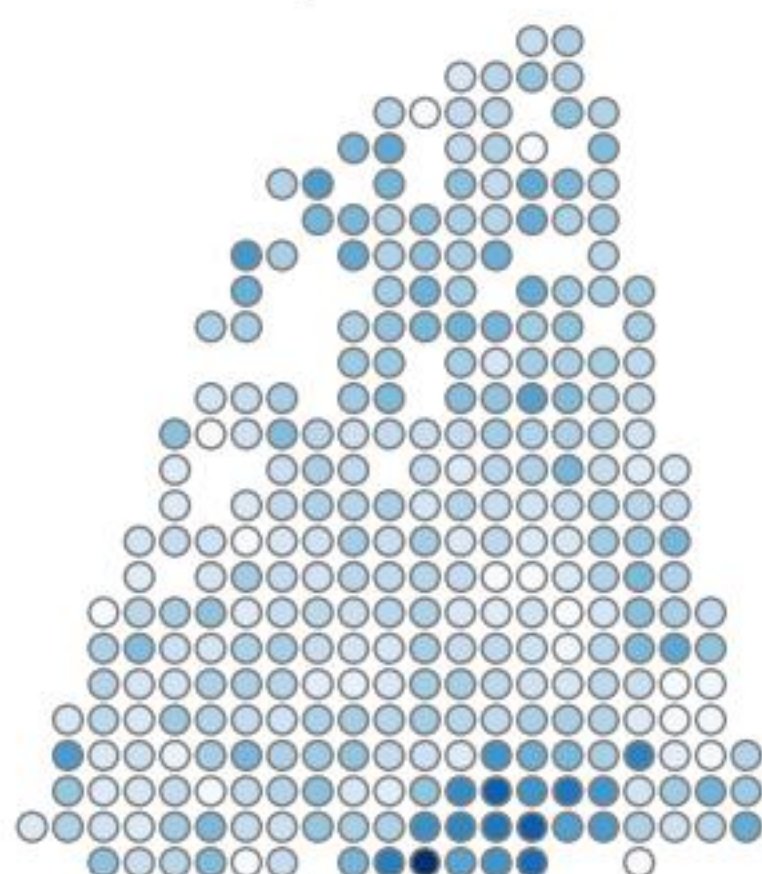

Myeloid

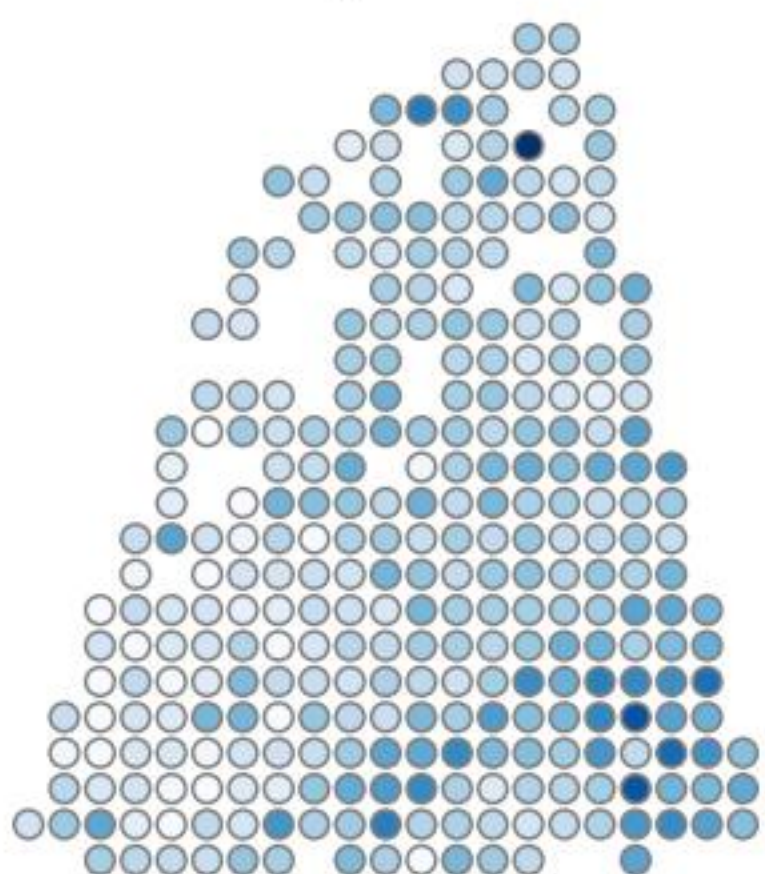

Plasma Cells

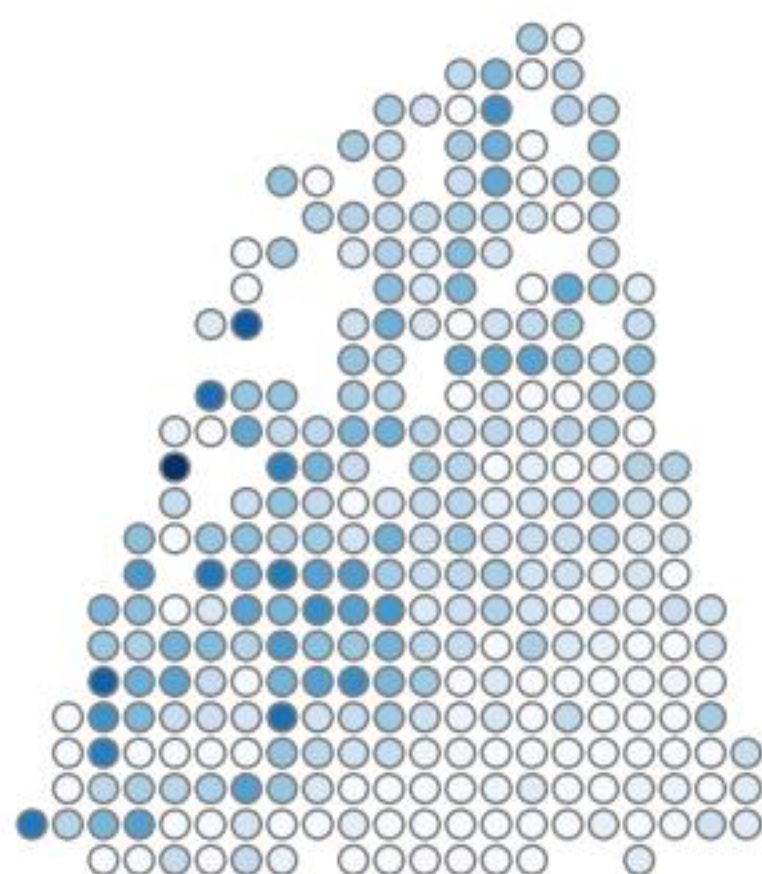

PVL

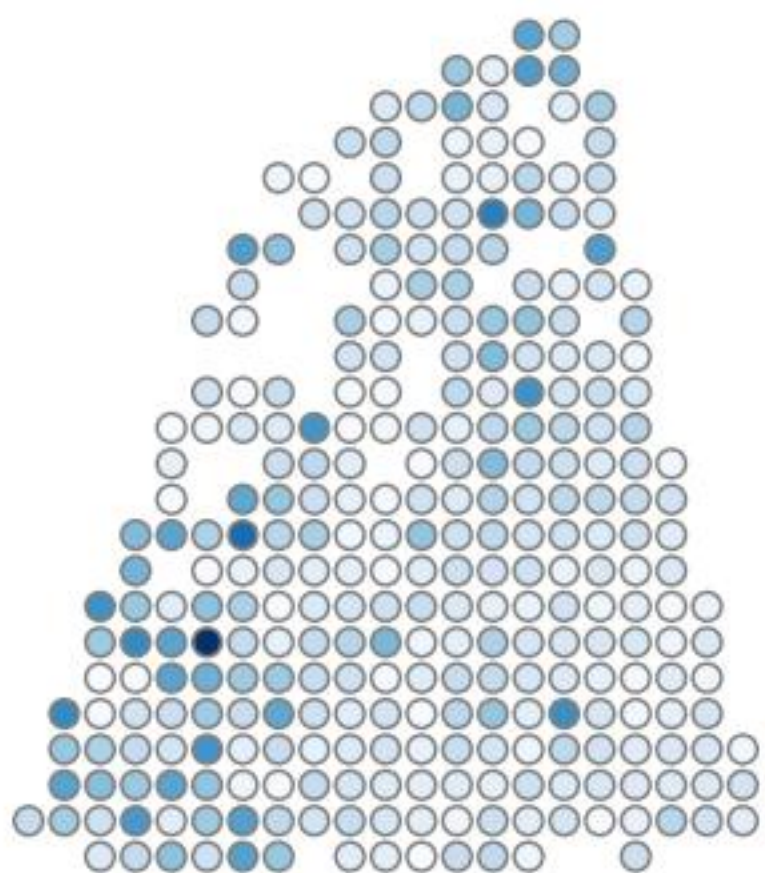

T-cells

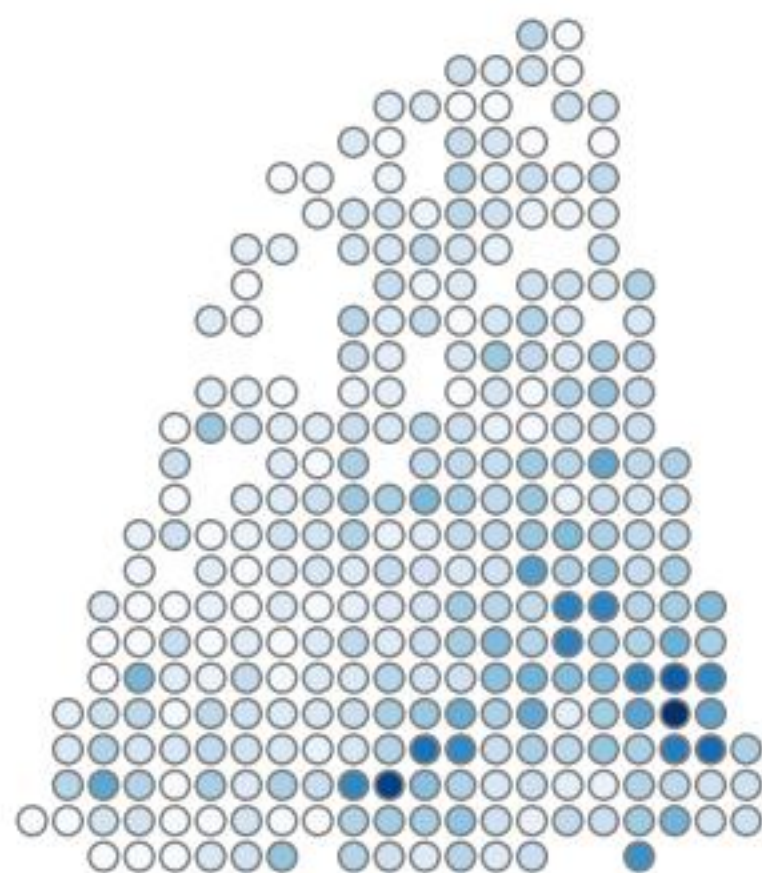

# major\_B4

B-cells

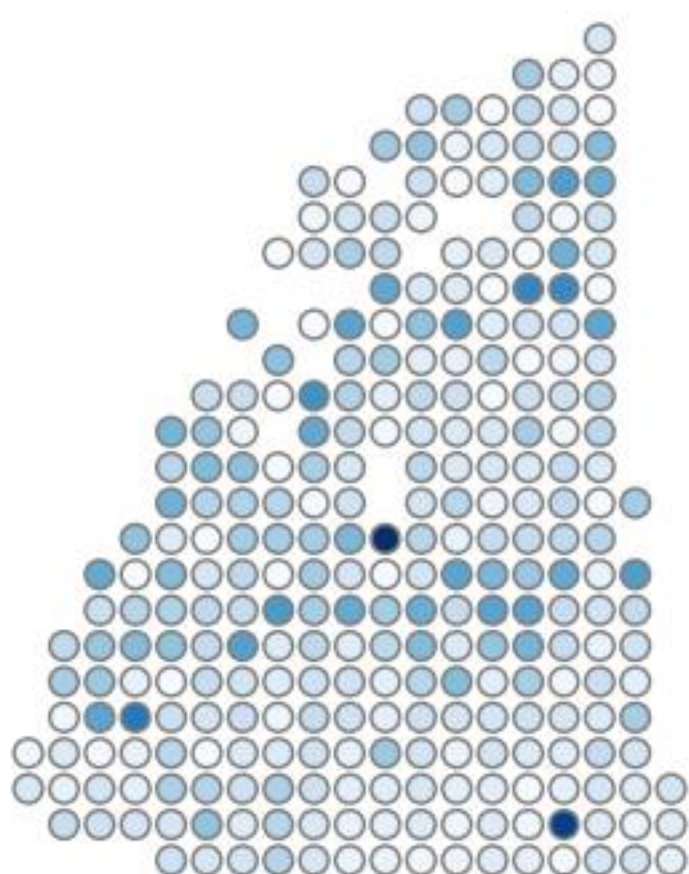

CAFs

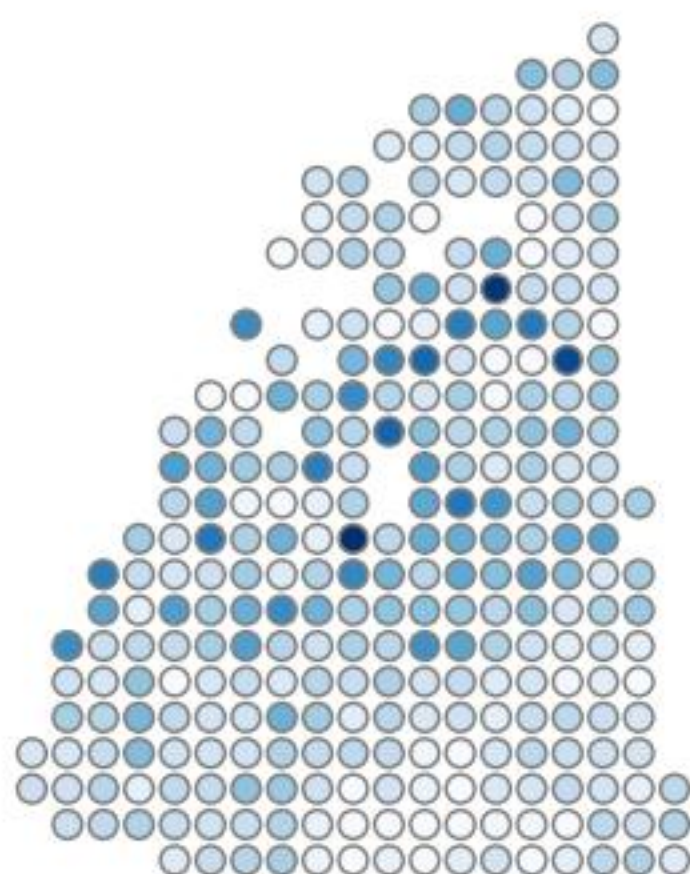

Endothelial

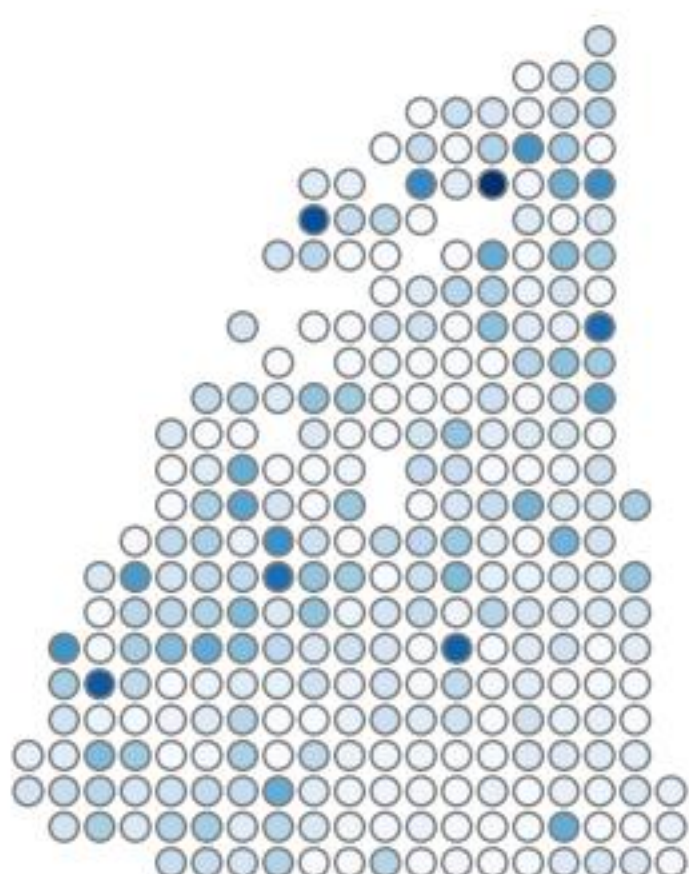

Epithelial

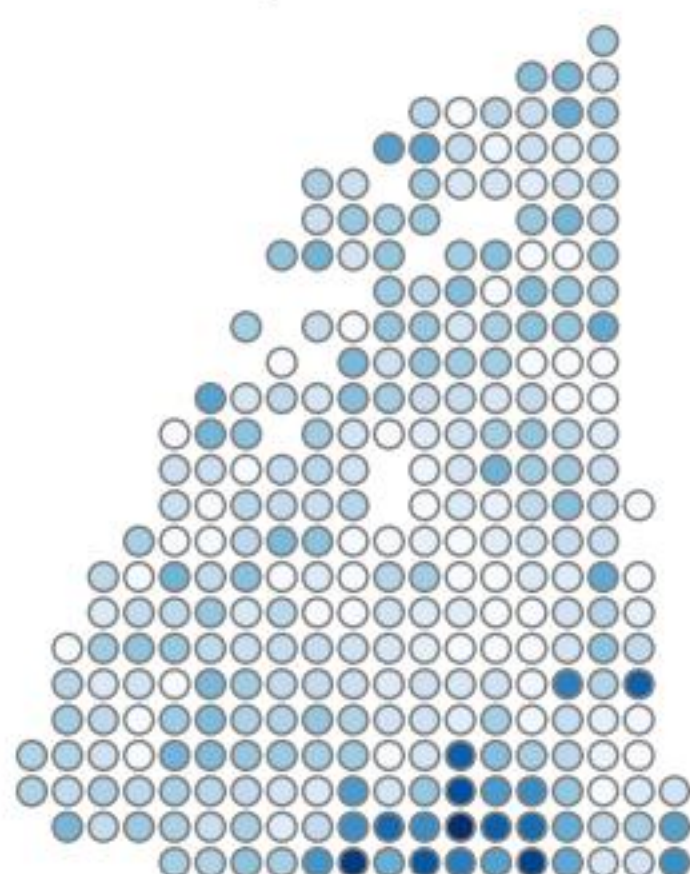

Myeloid

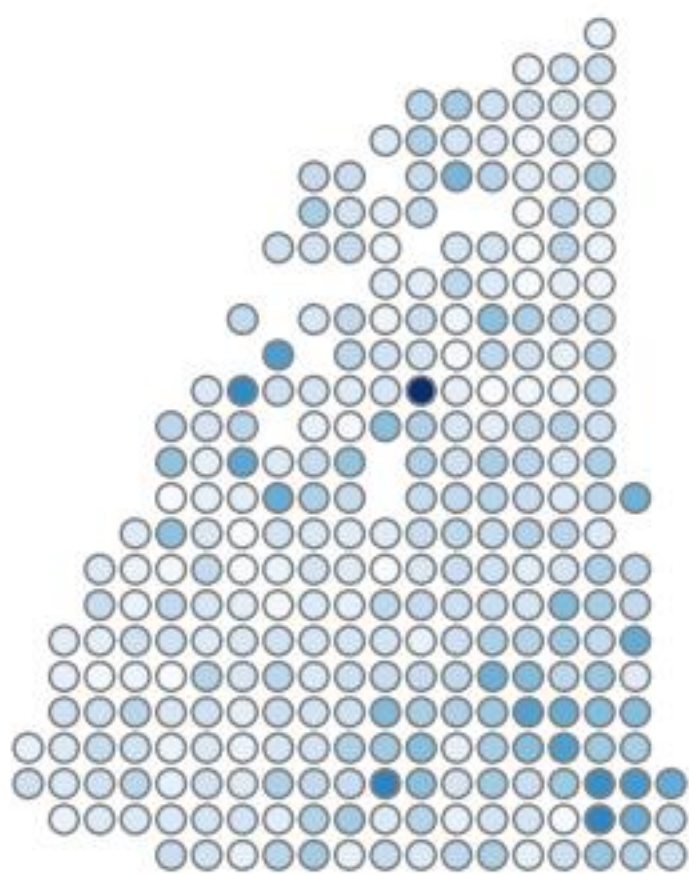

Plasma Cells

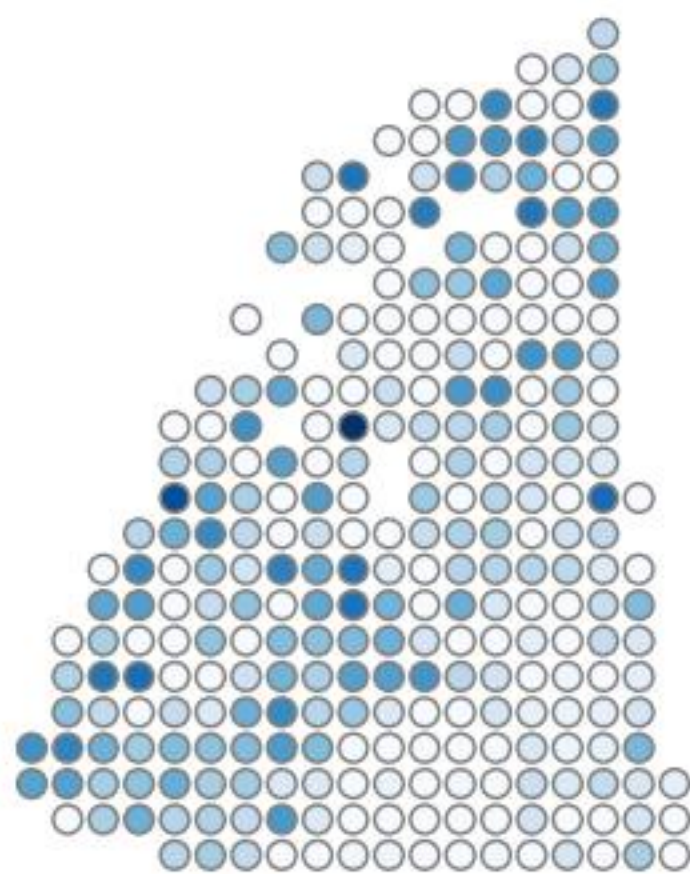

PVL

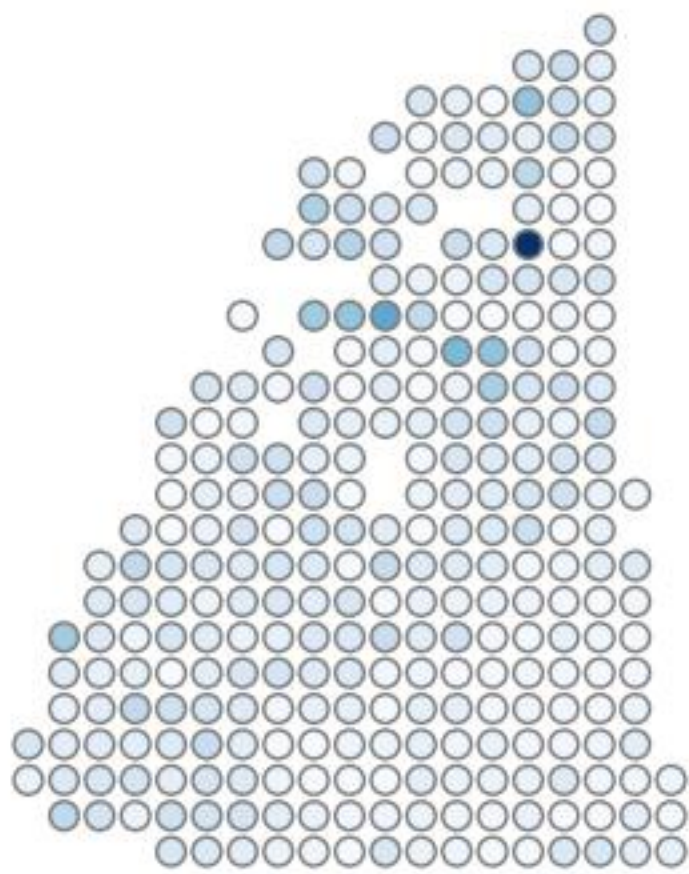

T-cells

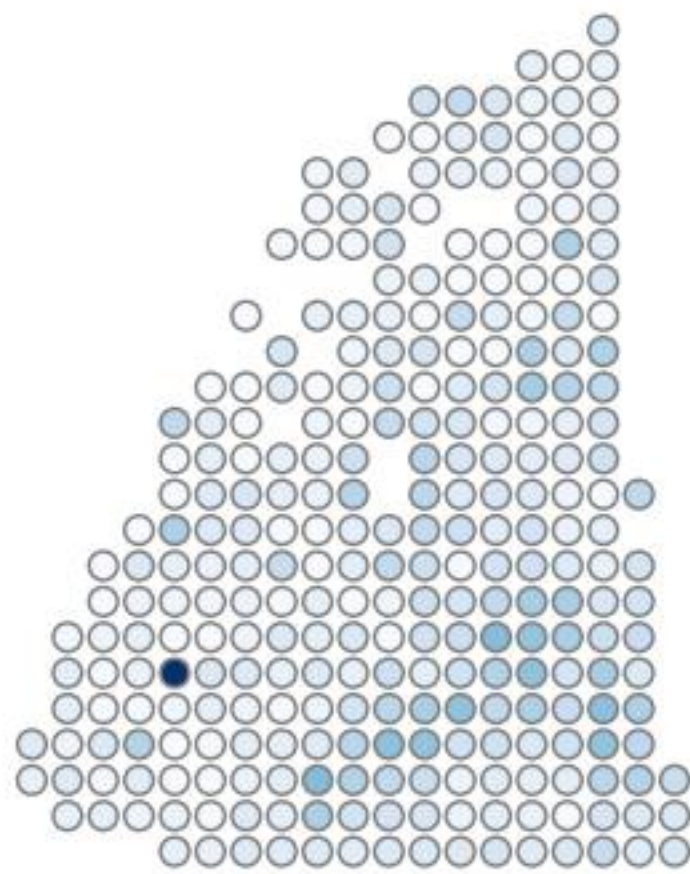

# major\_D3

B-cells

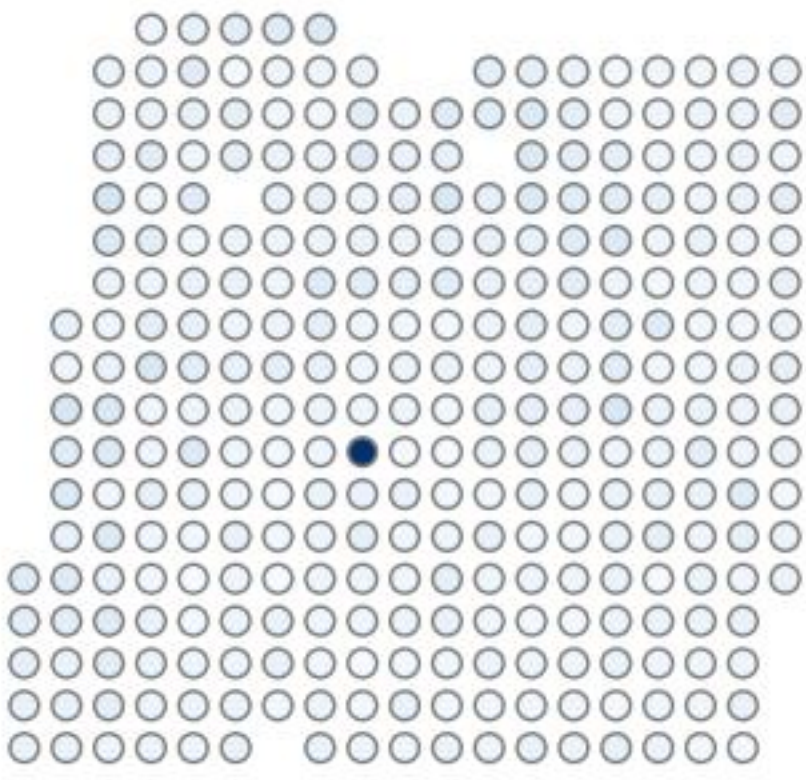

CAFs

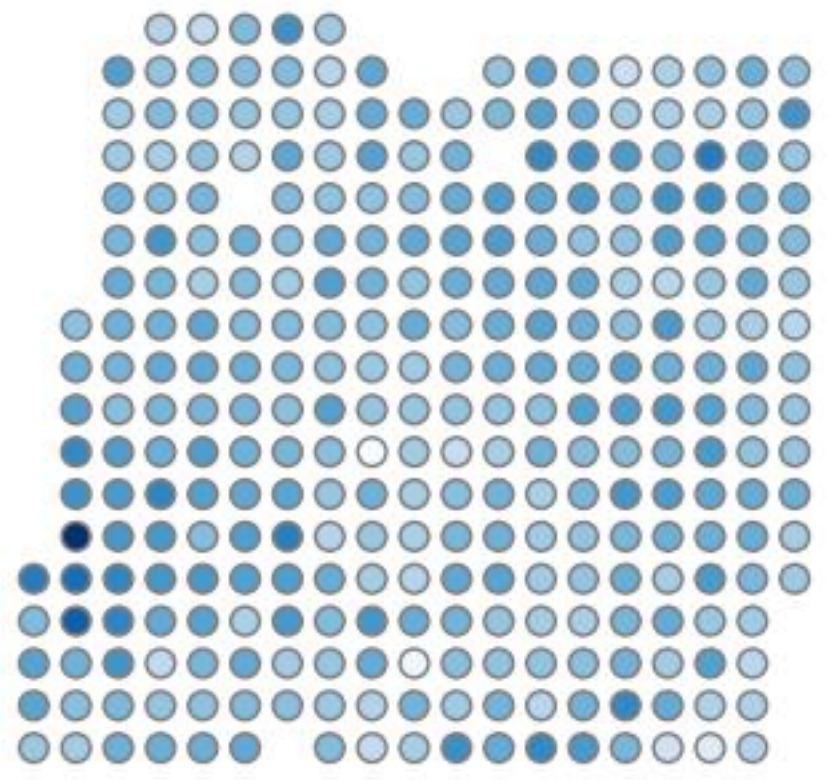

Endothelial

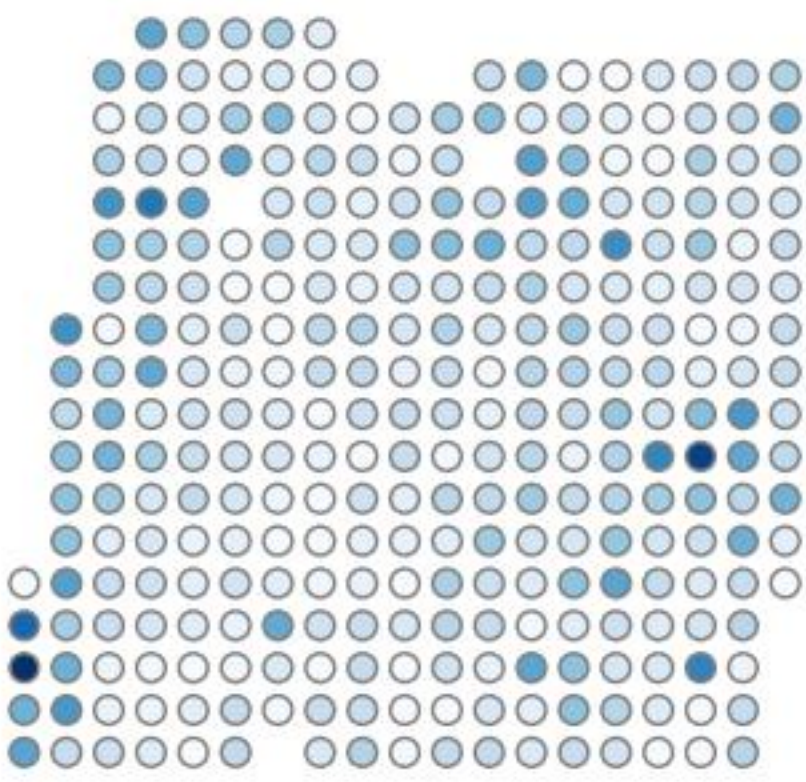

Epithelial

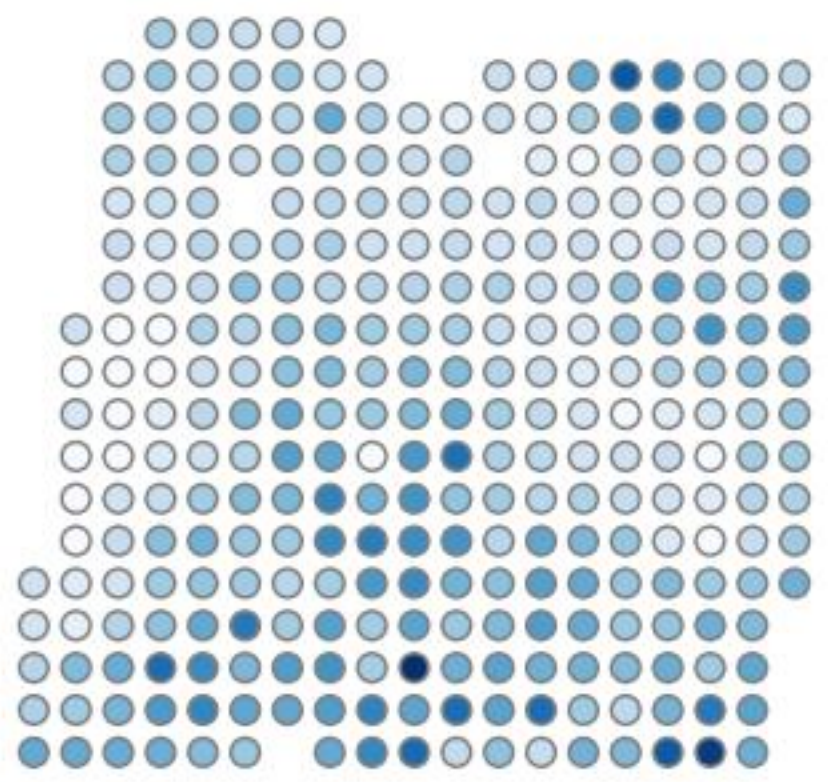

Myeloid

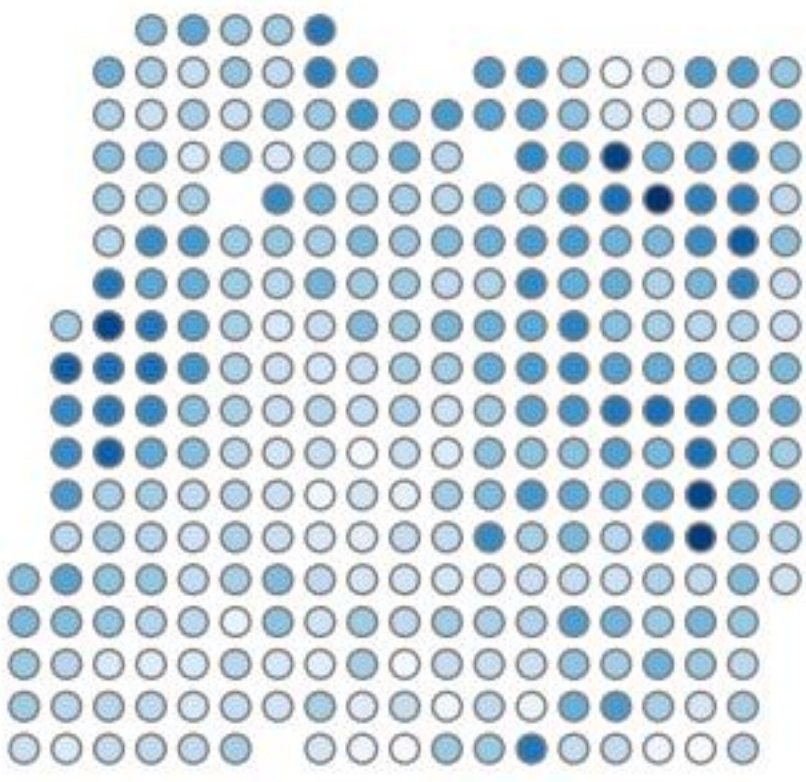

Plasma Cells

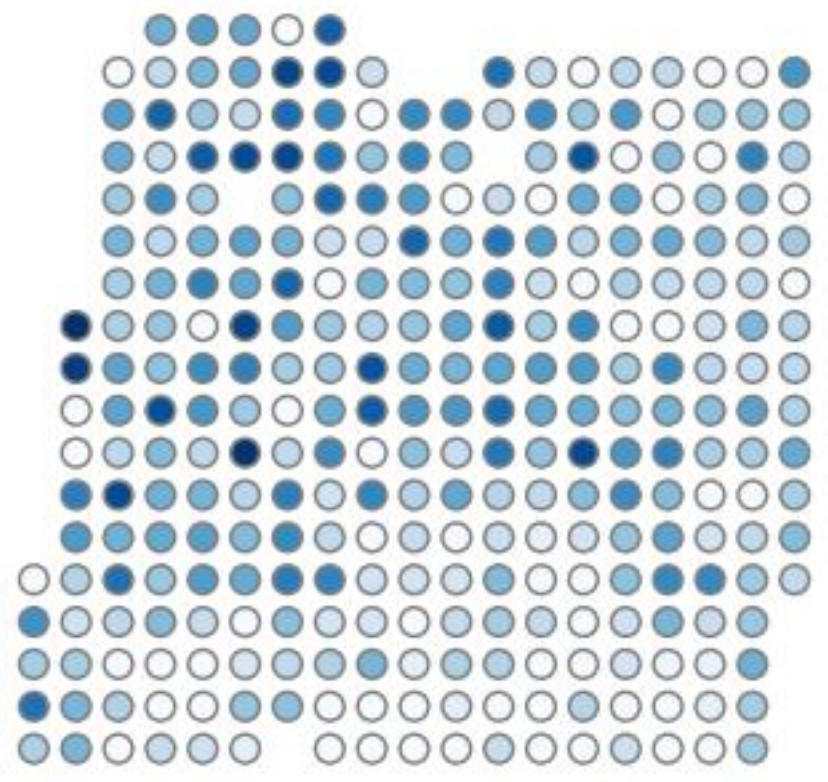

PVL

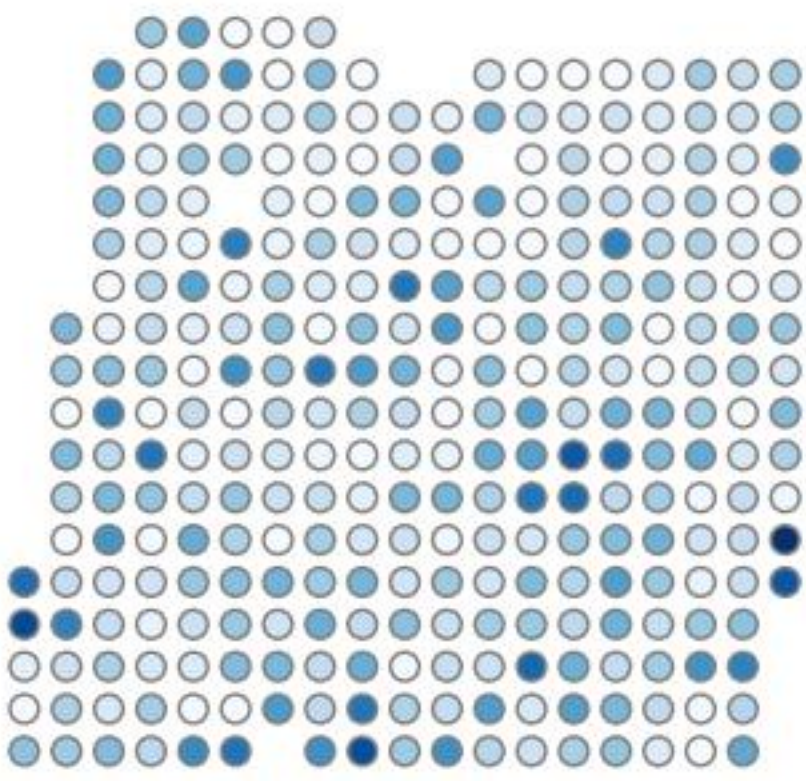

T-cells

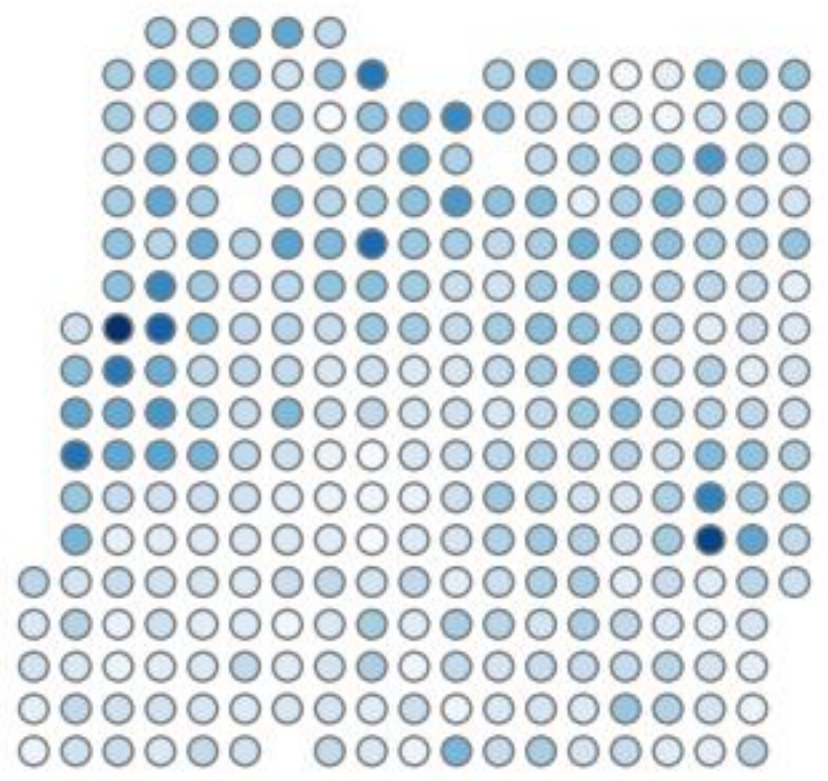

# major\_C2

B-cells

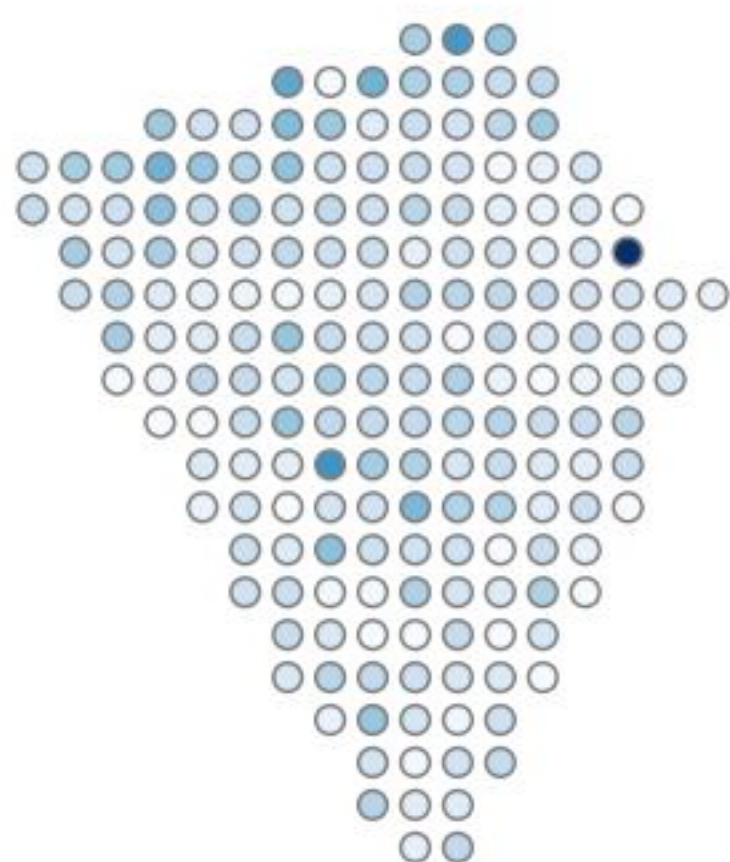

CAFs

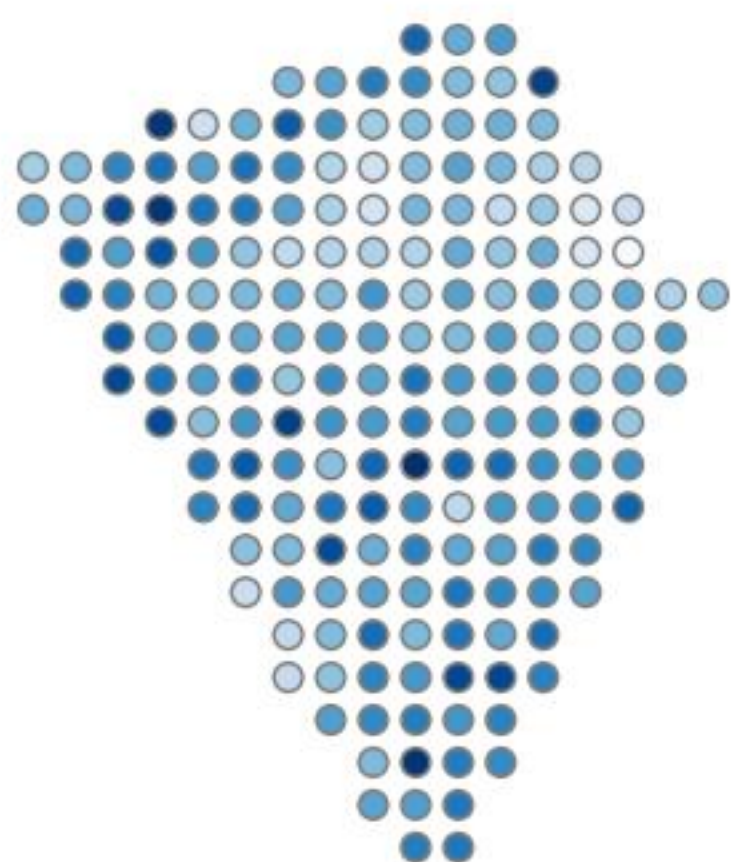

Endothelial

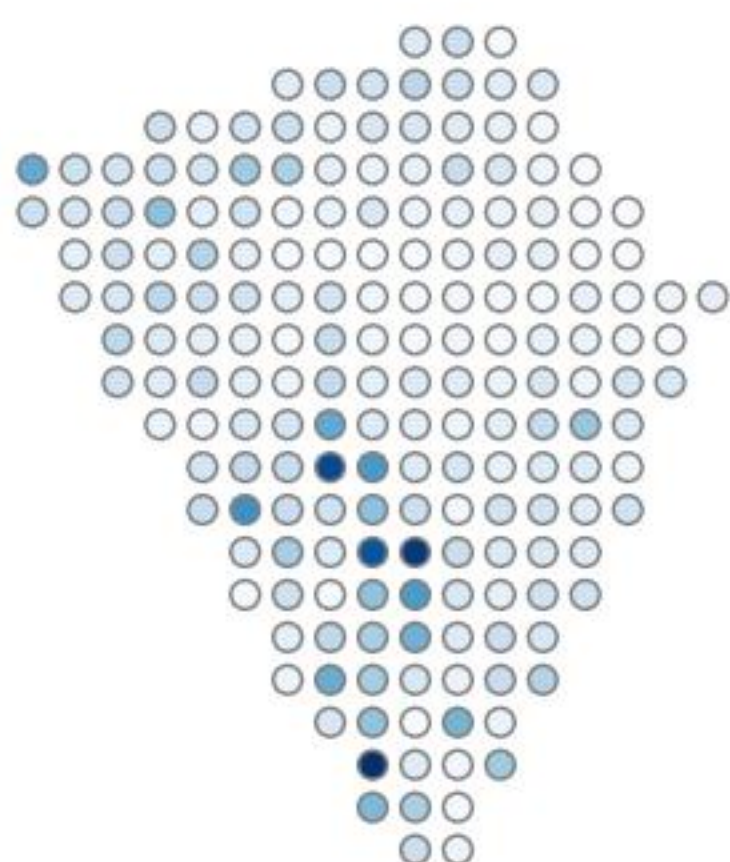

Epithelial

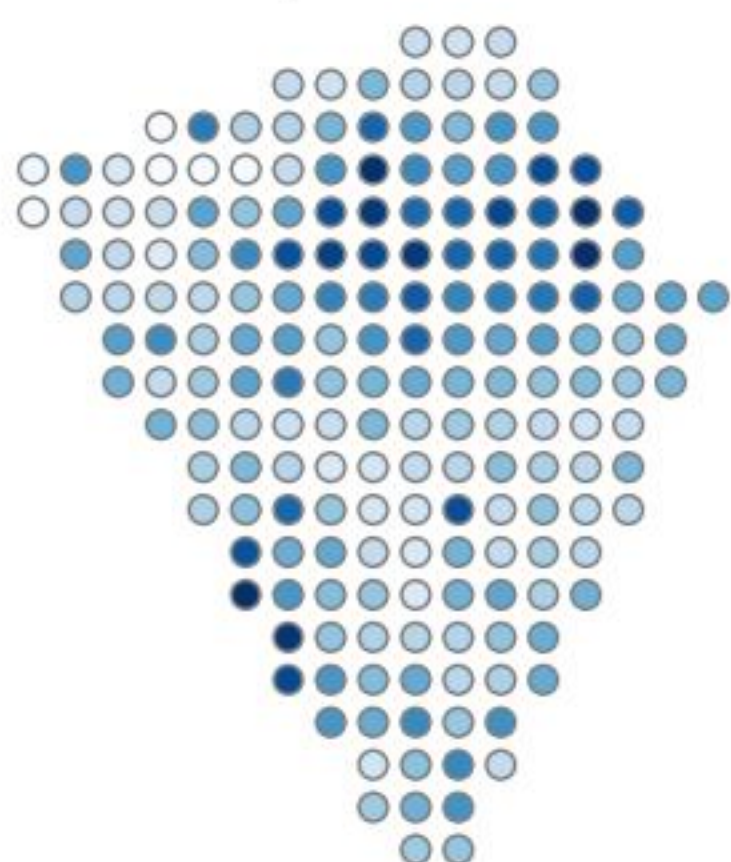

Myeloid

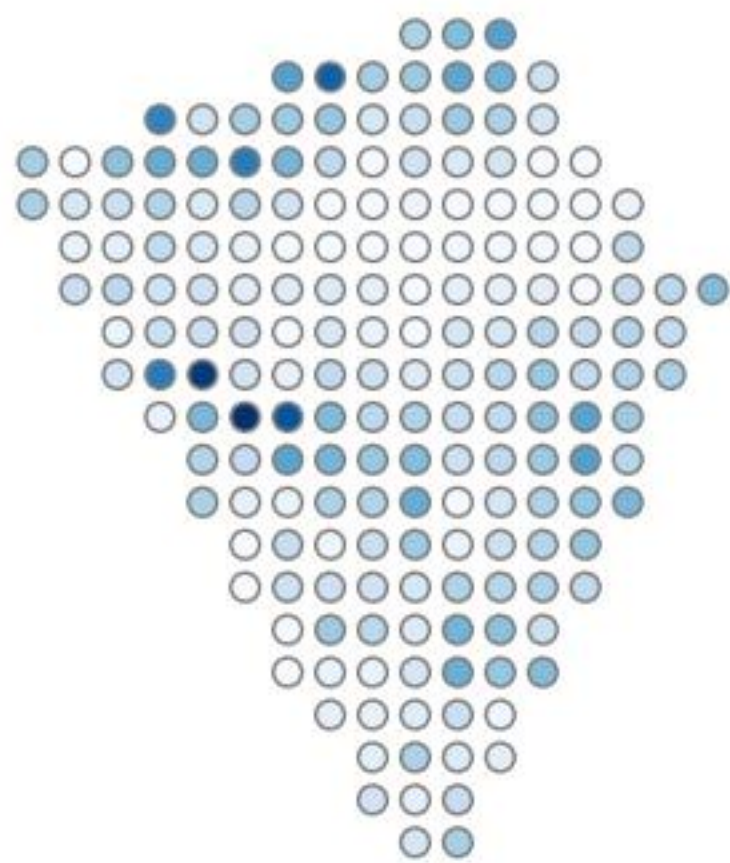

Plasma Cells

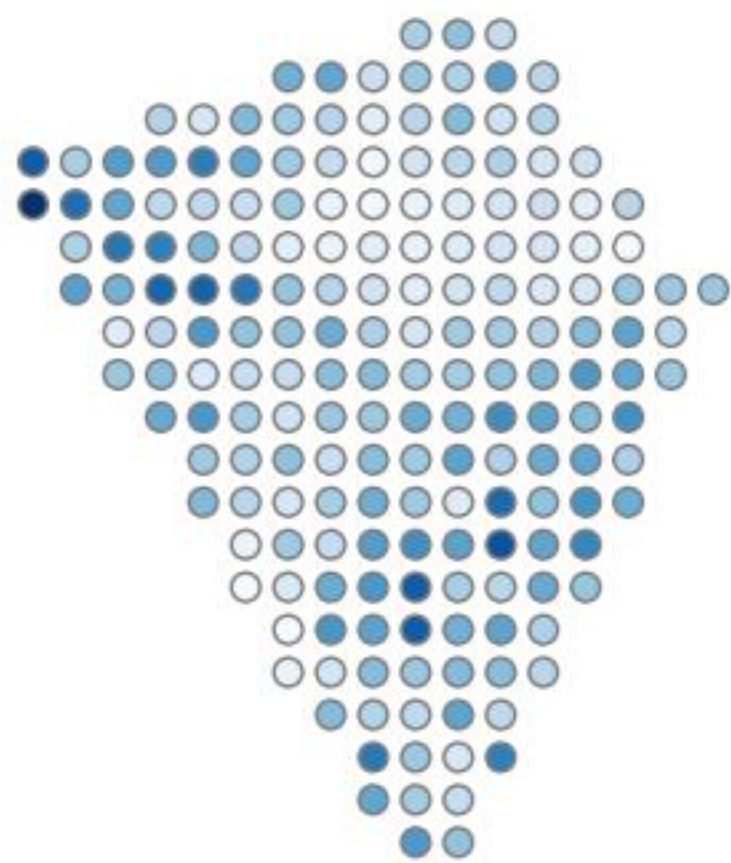

PVL

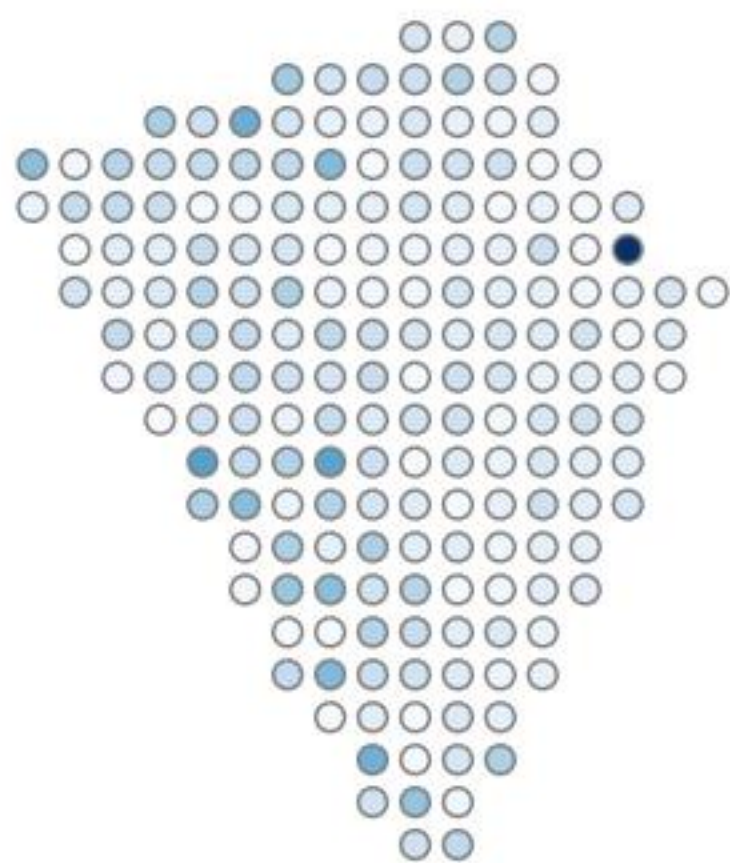

T-cells

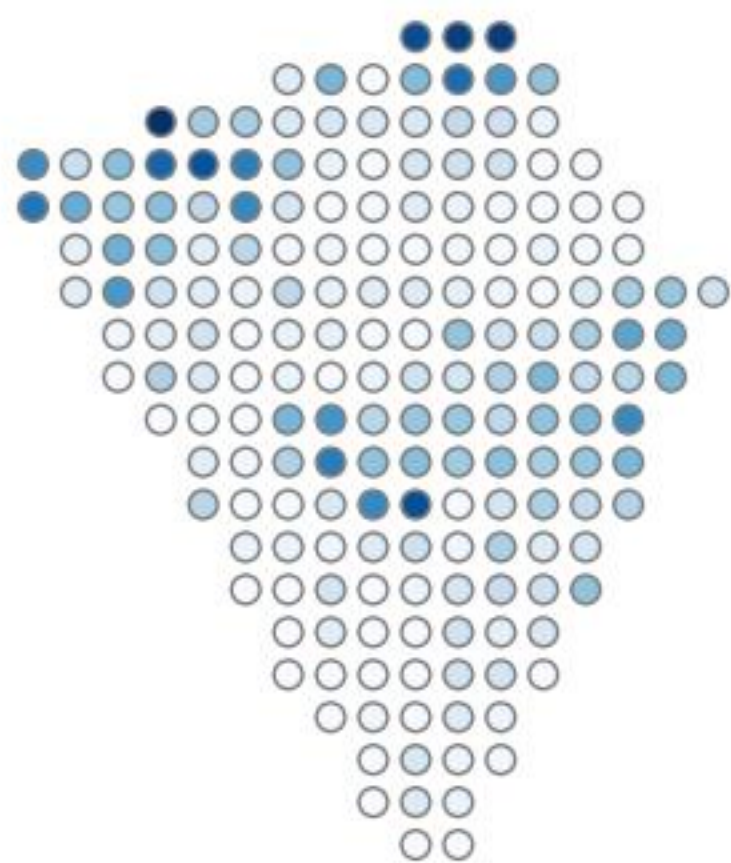

# major\_C6

B-cells

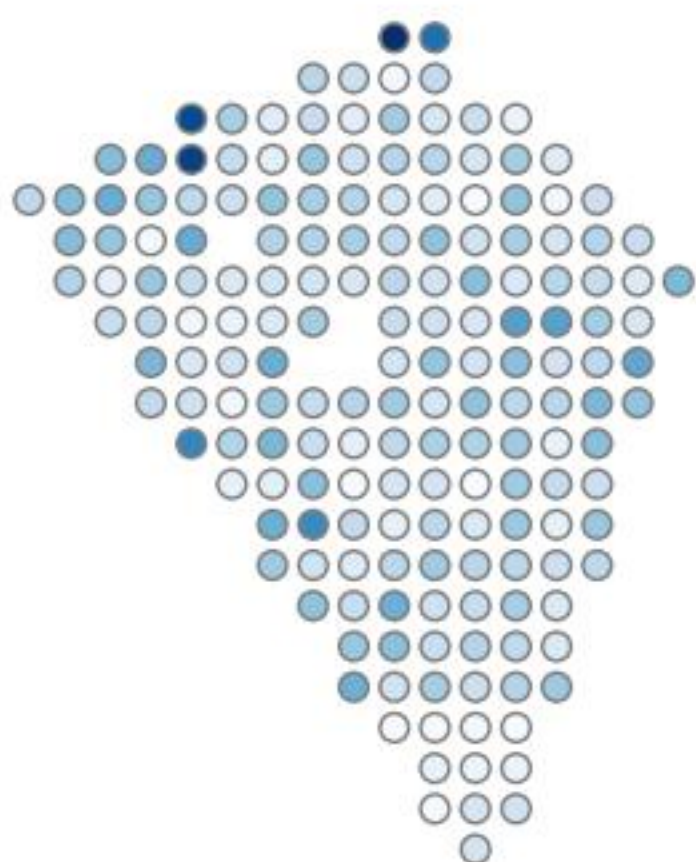

CAFs

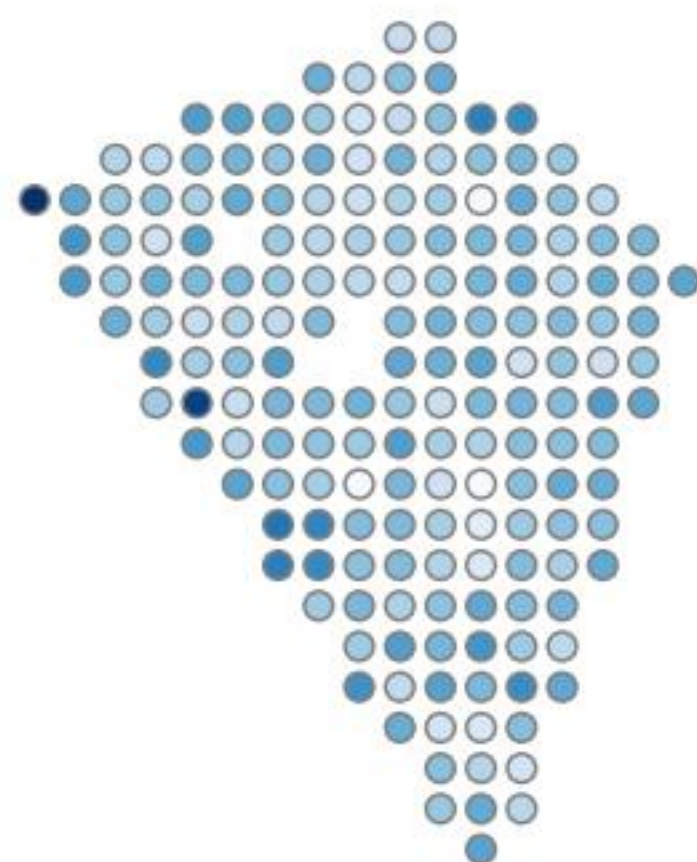

Endothelial

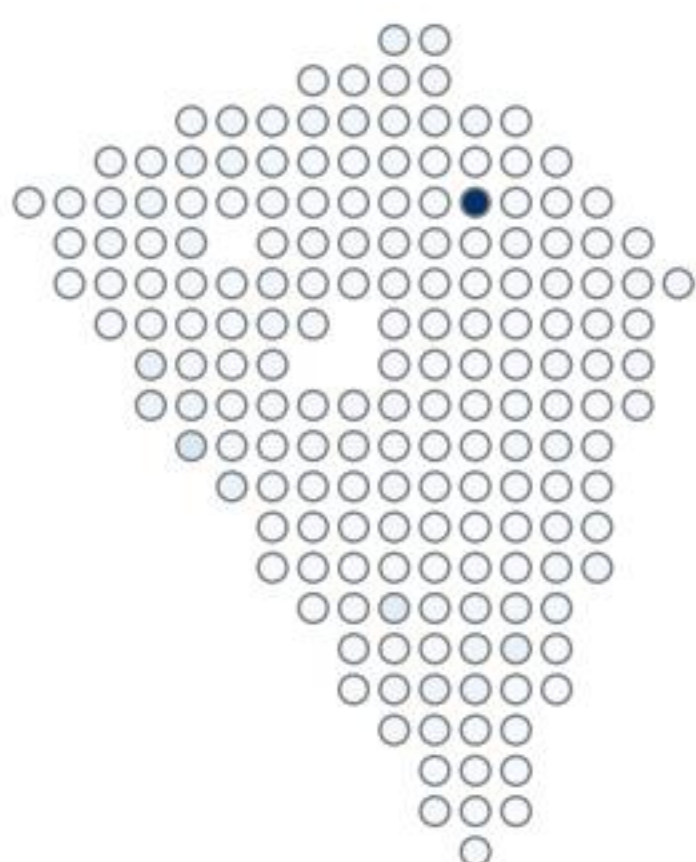

Epithelial

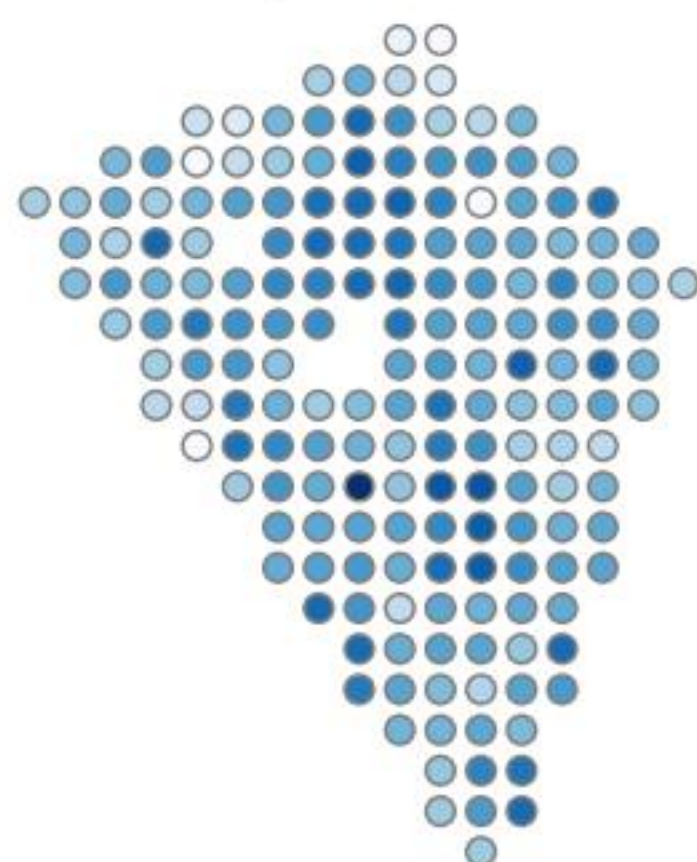

Myeloid

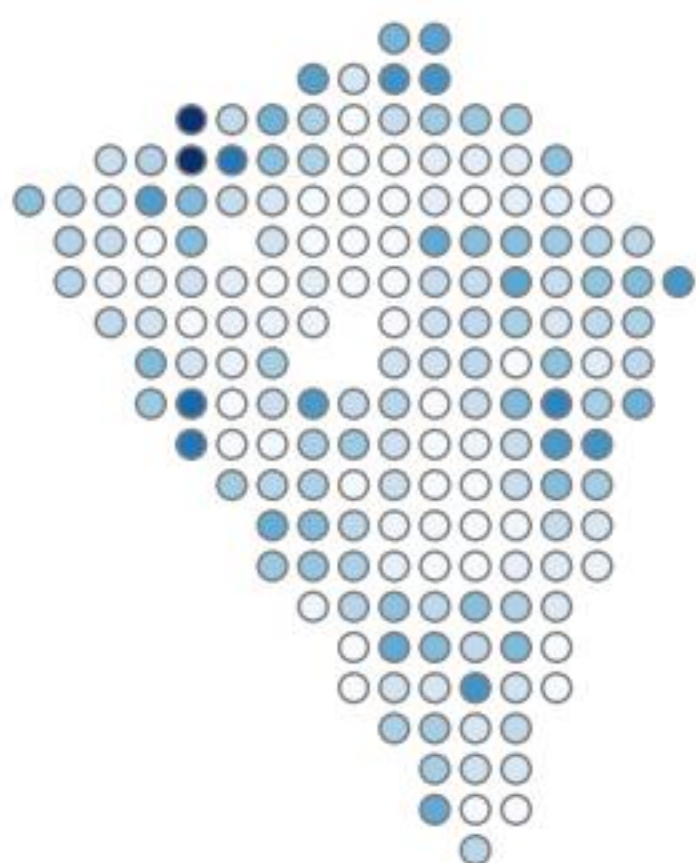

Plasma Cells

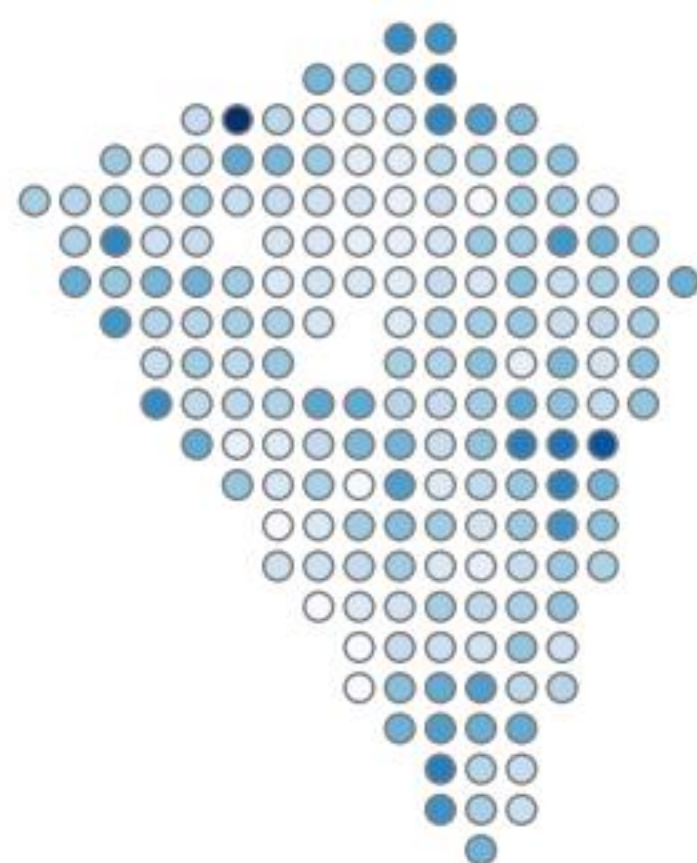

PVL

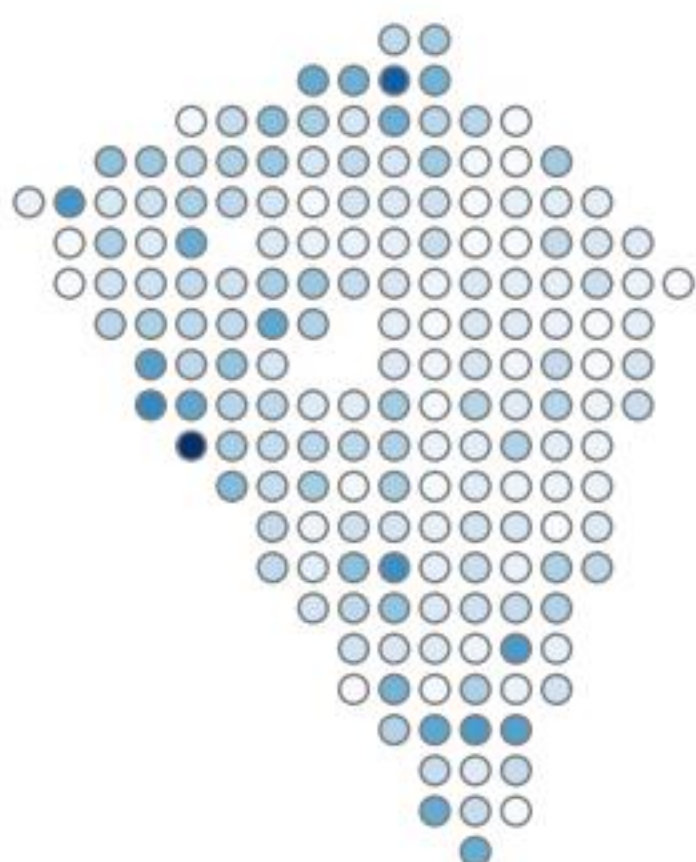

T-cells

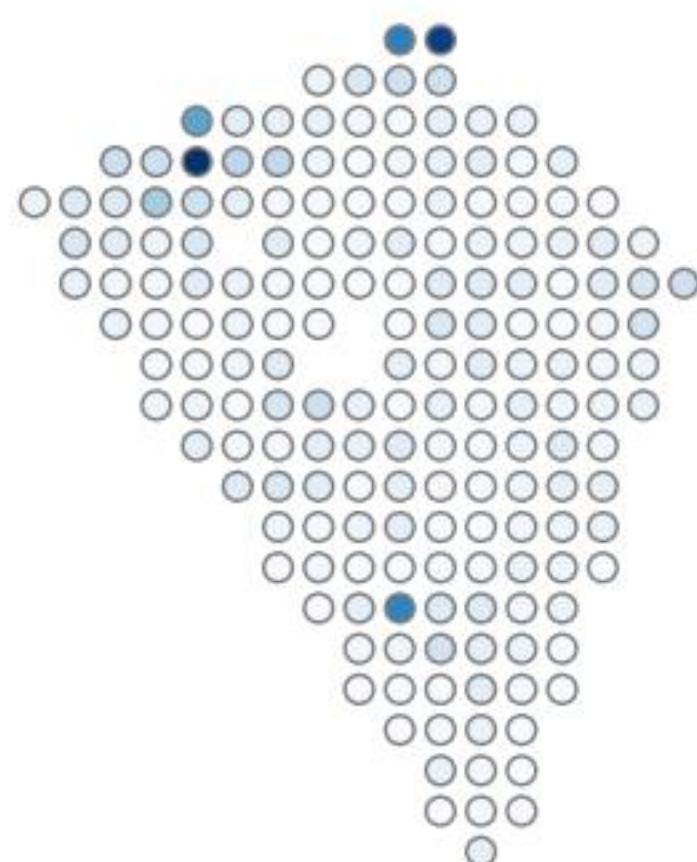



# major\_A5

B-cells

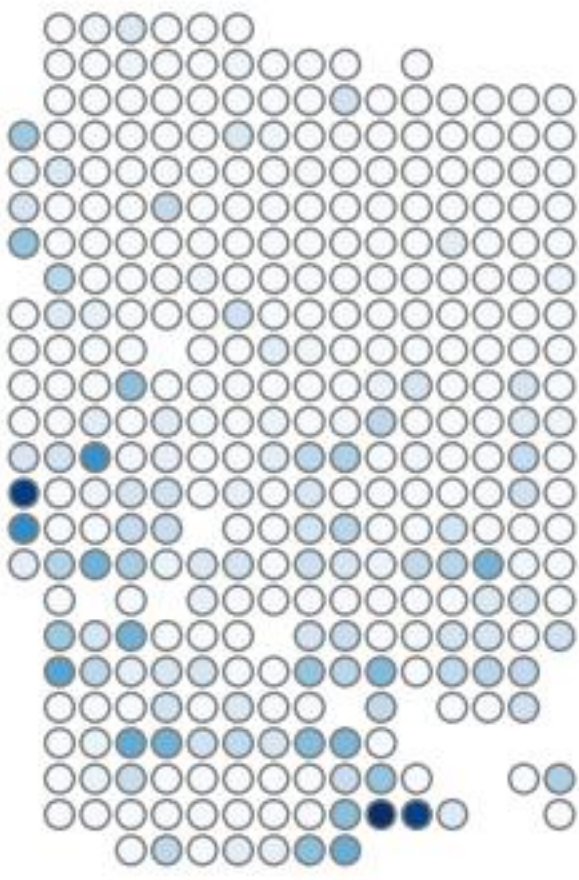

CAFs

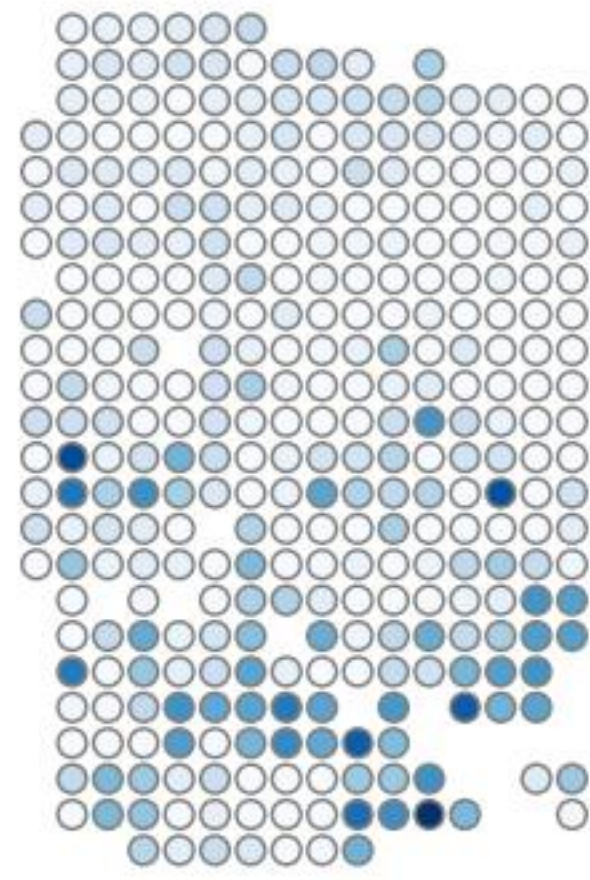

Endothelial

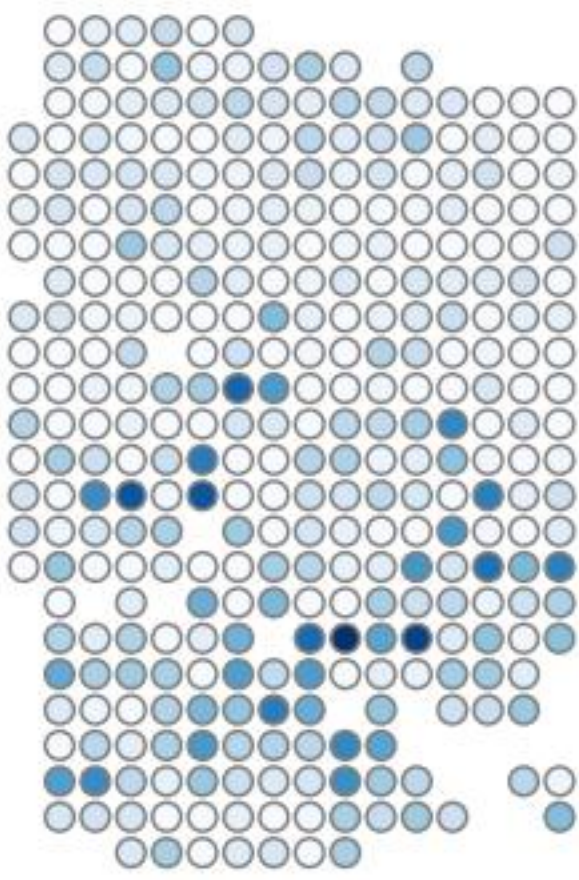

Epithelial

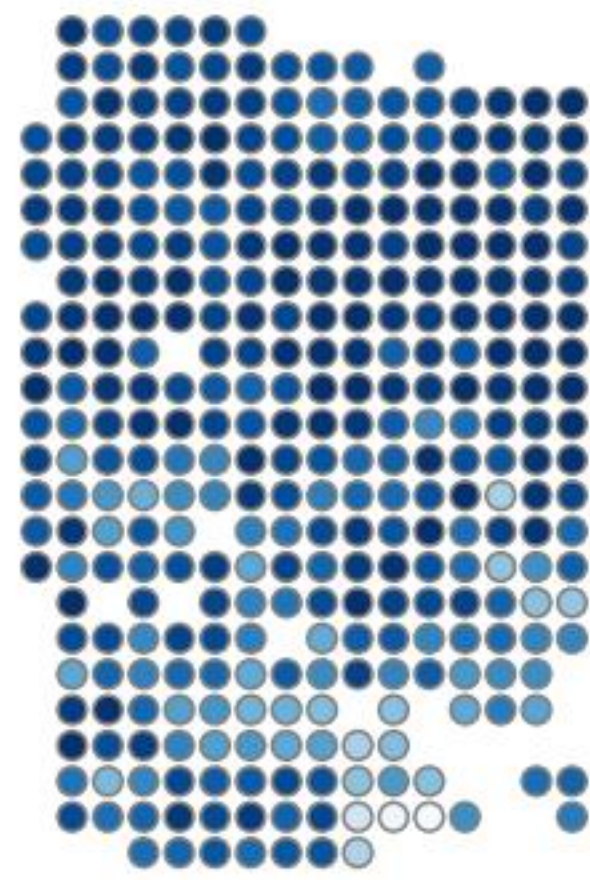

Myeloid

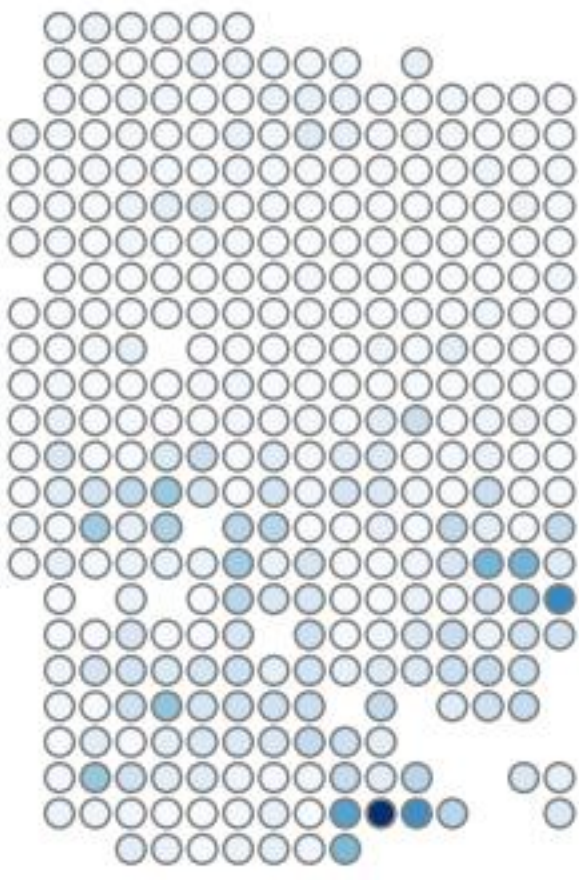

Plasma Cells

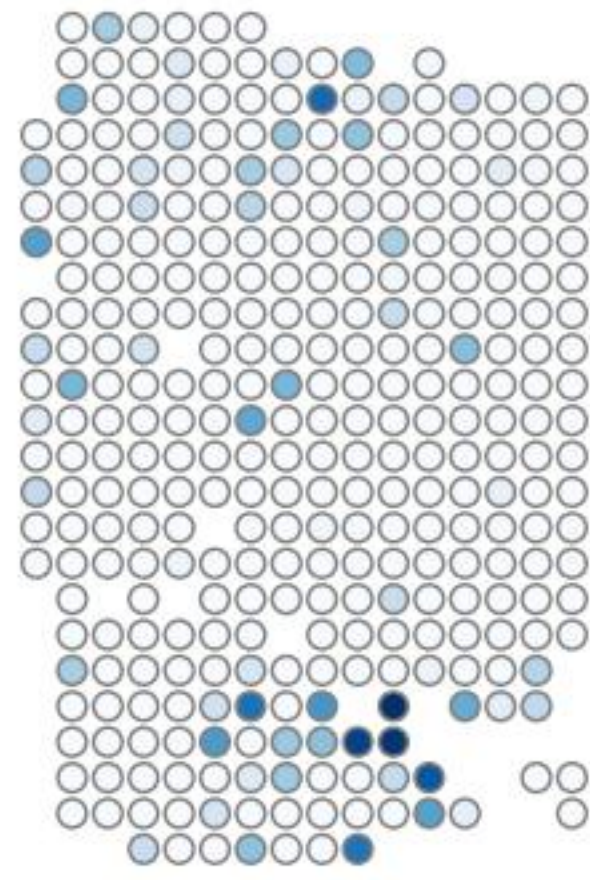

PVL

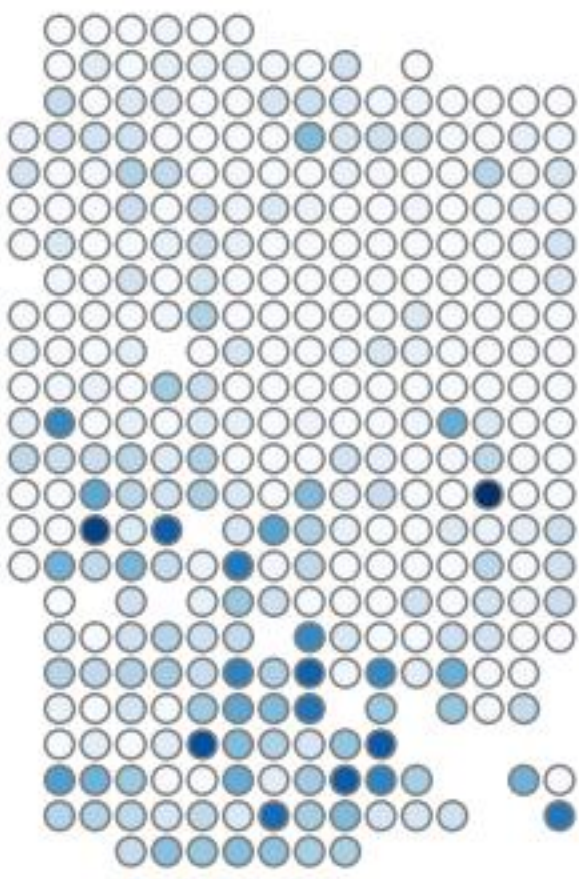

T-cells

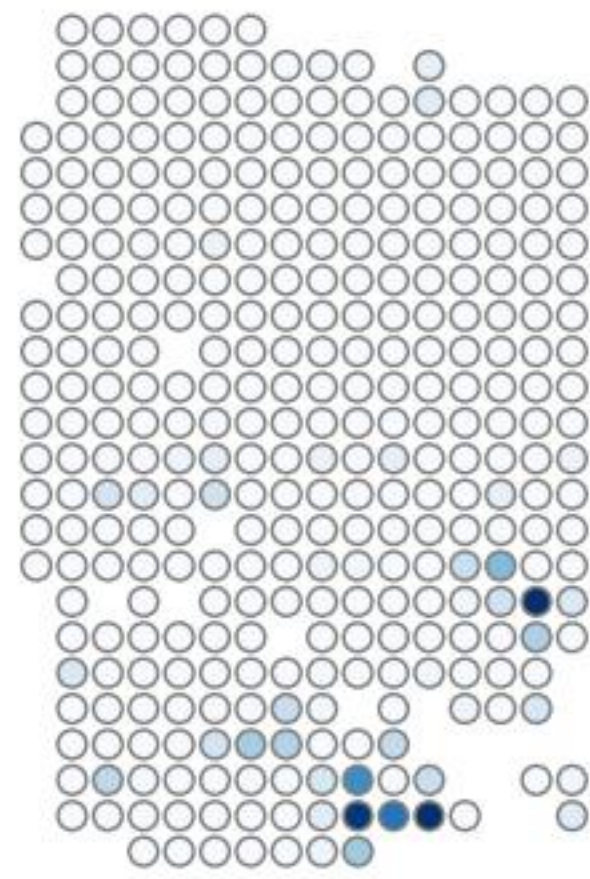

# major\_H3

B-cells

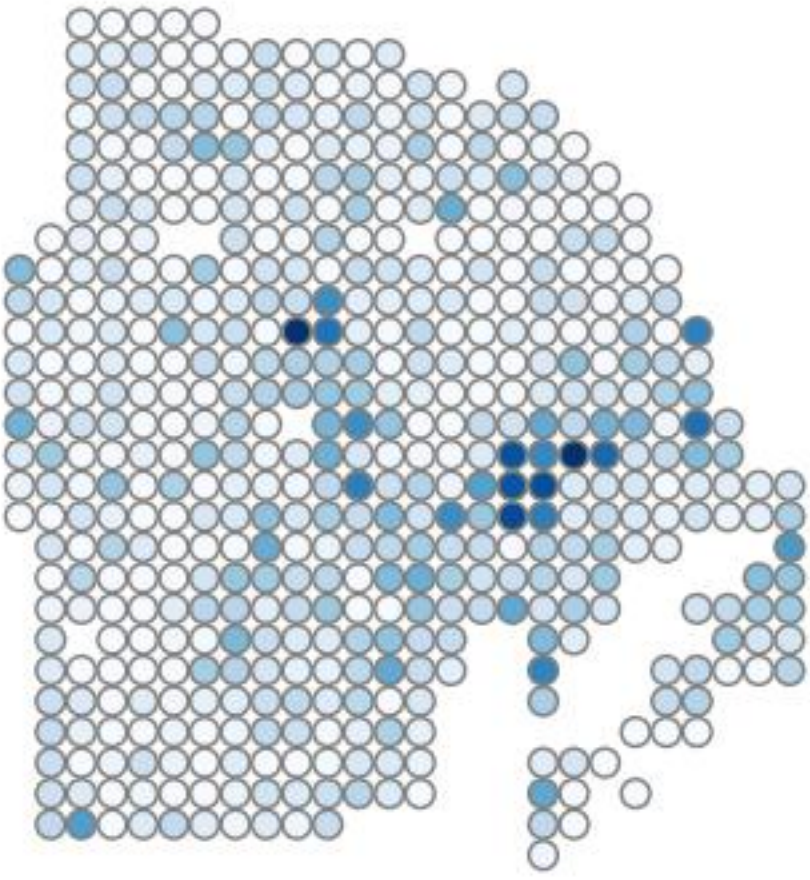

CAFs

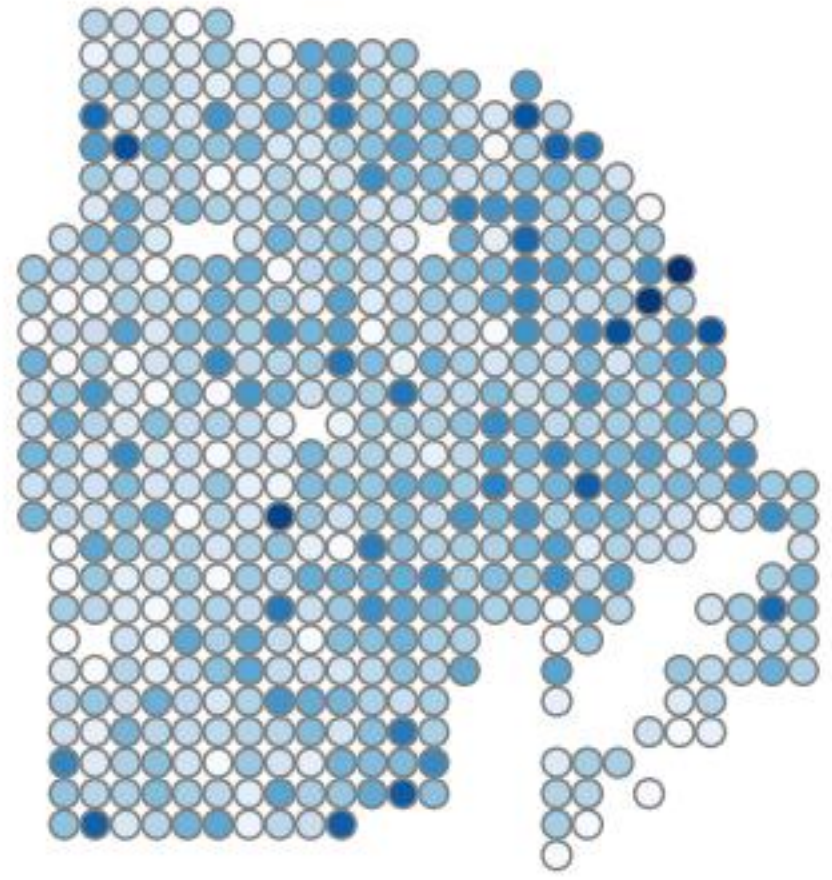

Endothelial

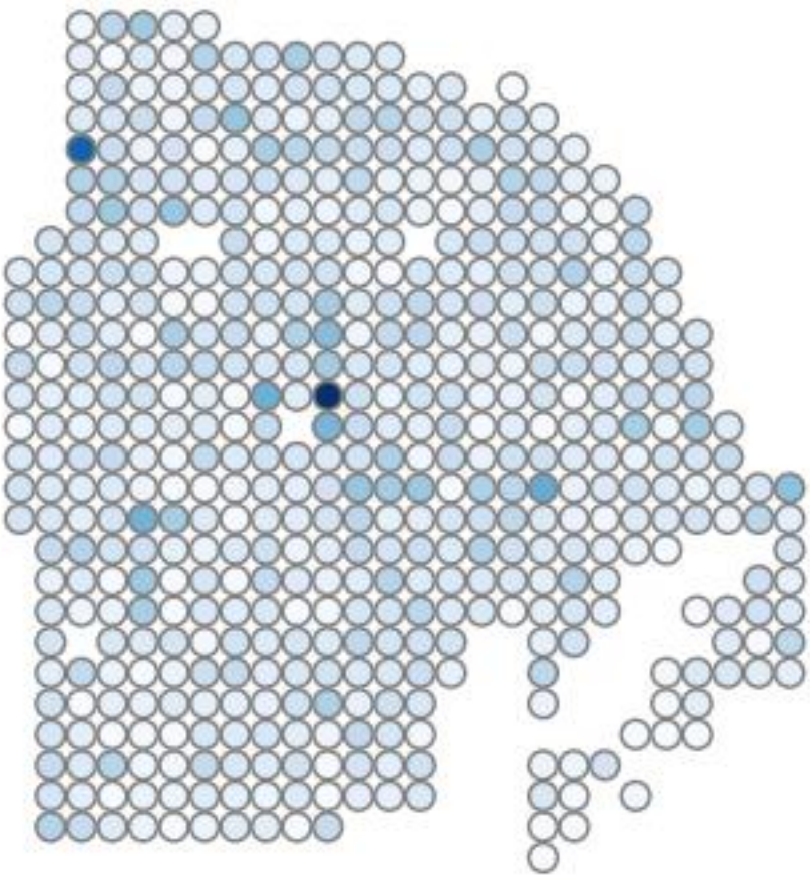

Epithelial

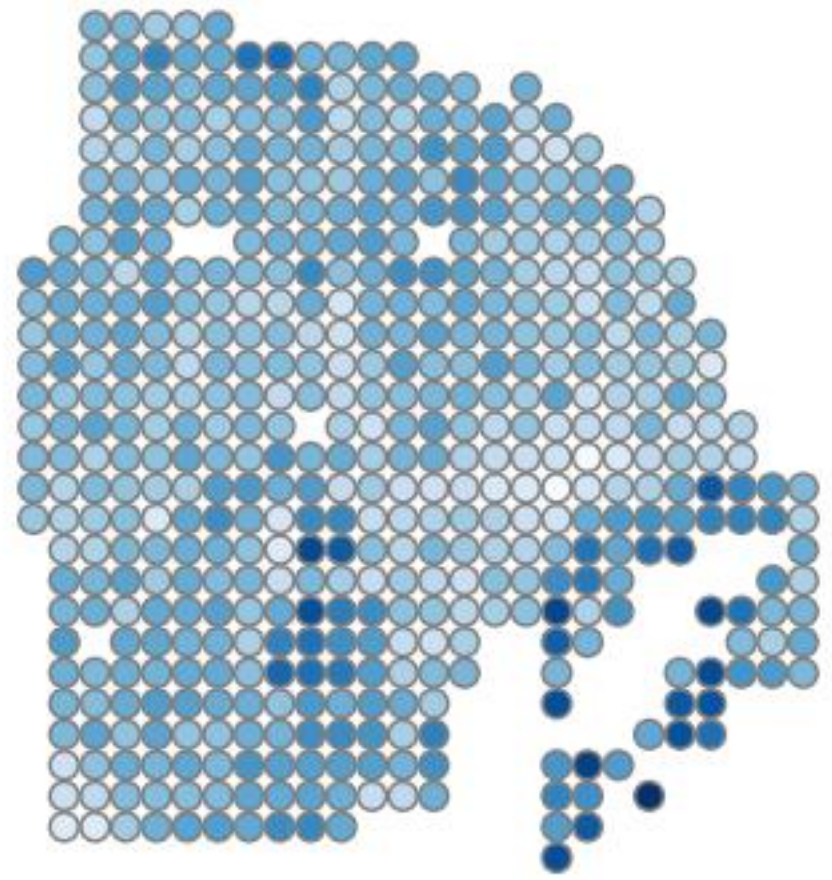

Myeloid

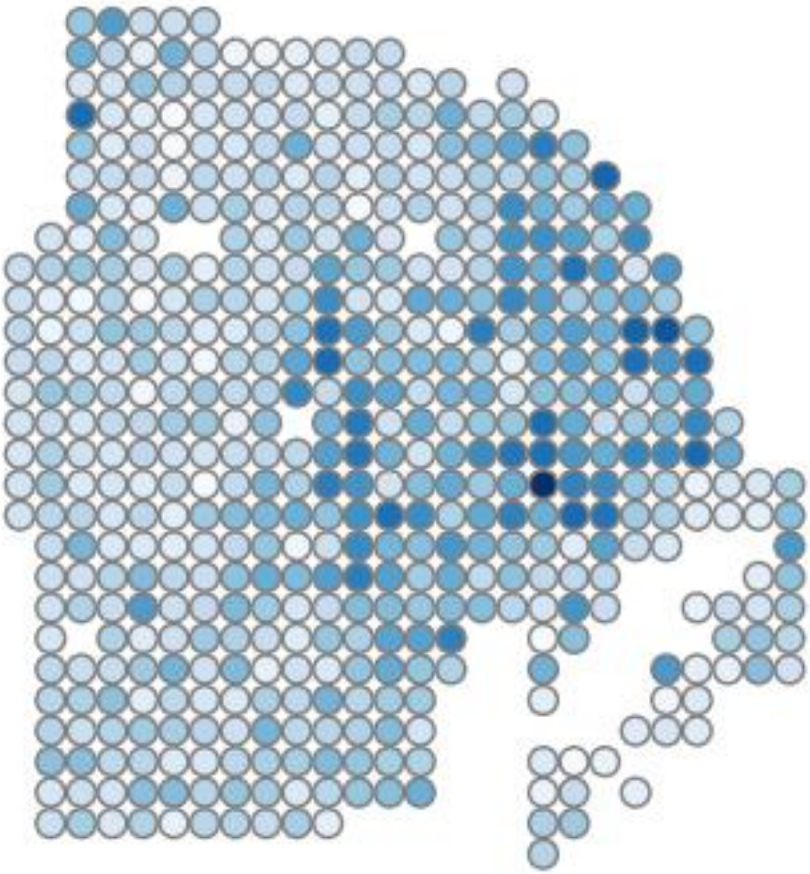

Plasma Cells

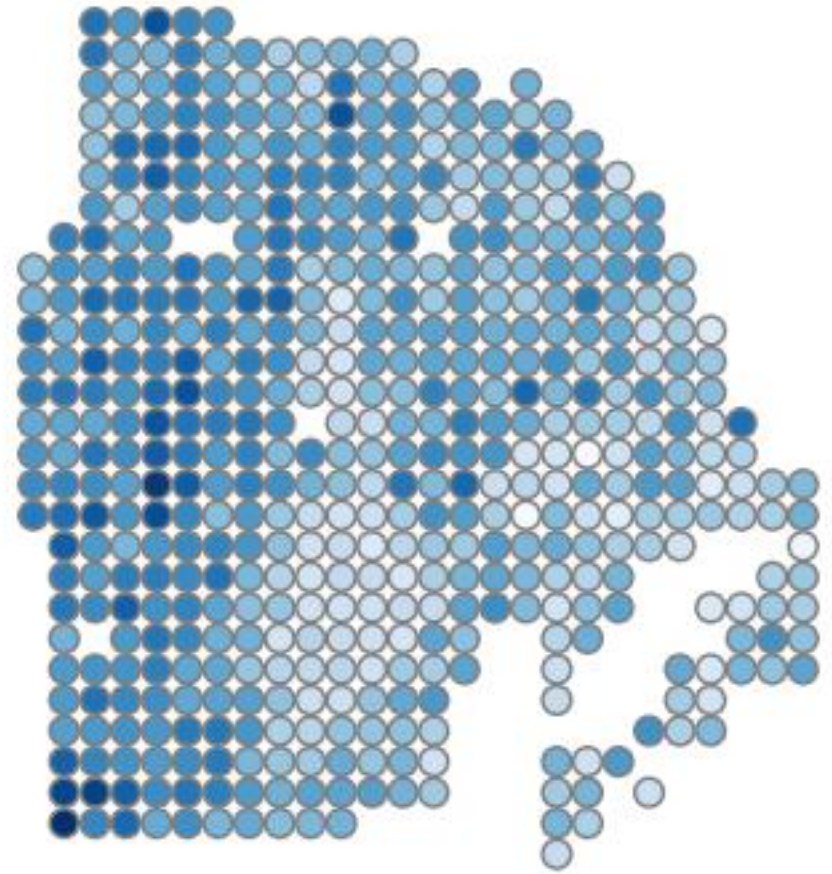

PVL

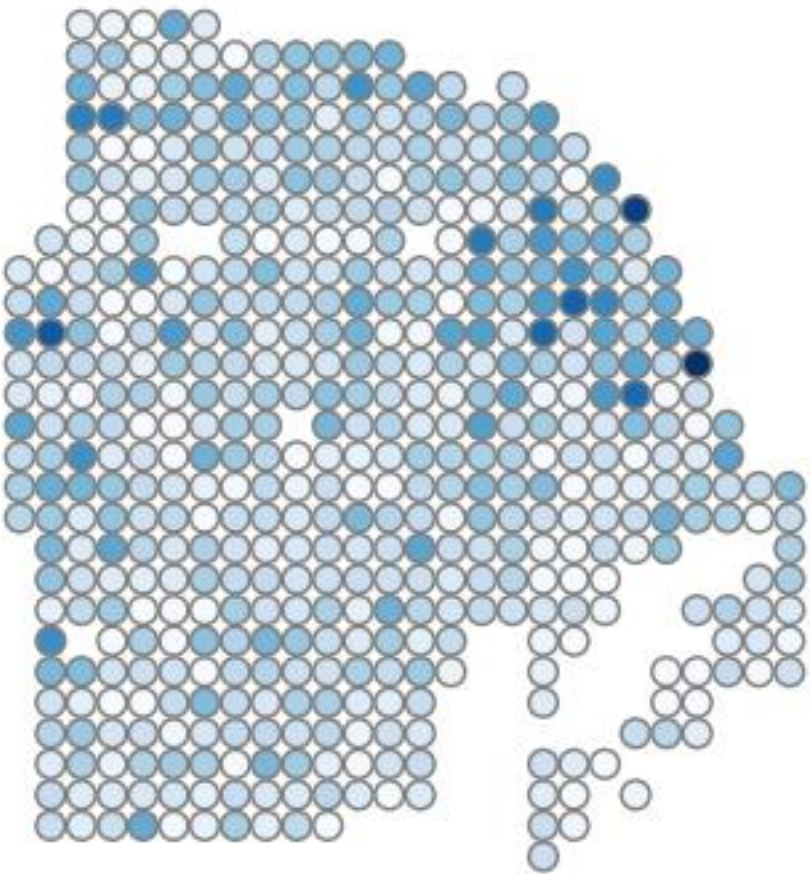

T-cells

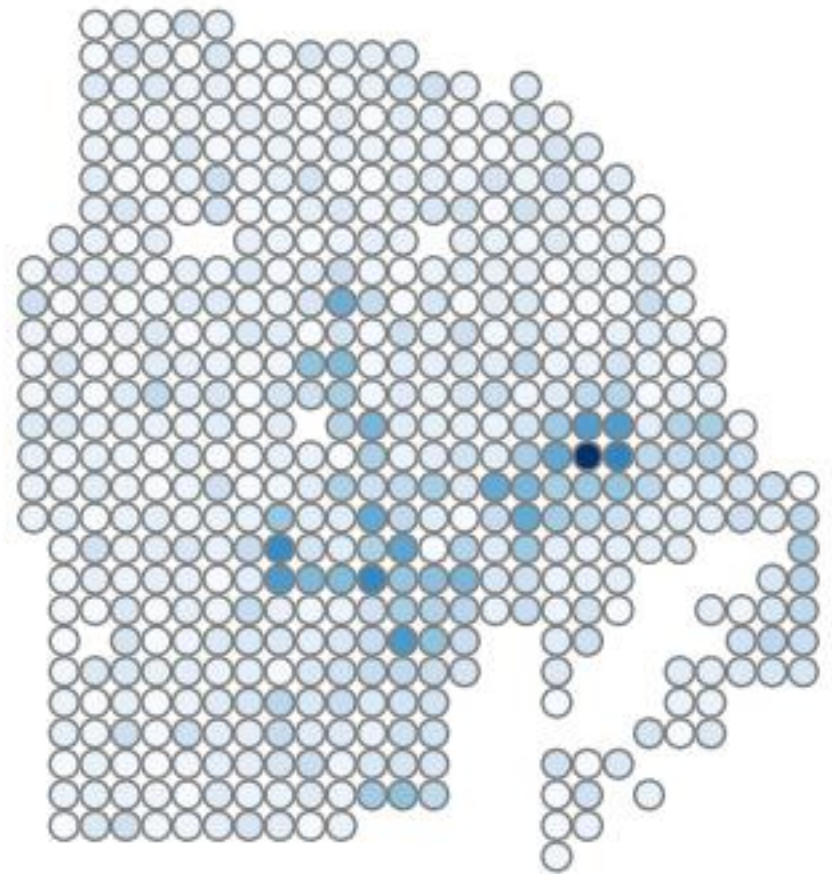

# major\_C1

B-cells

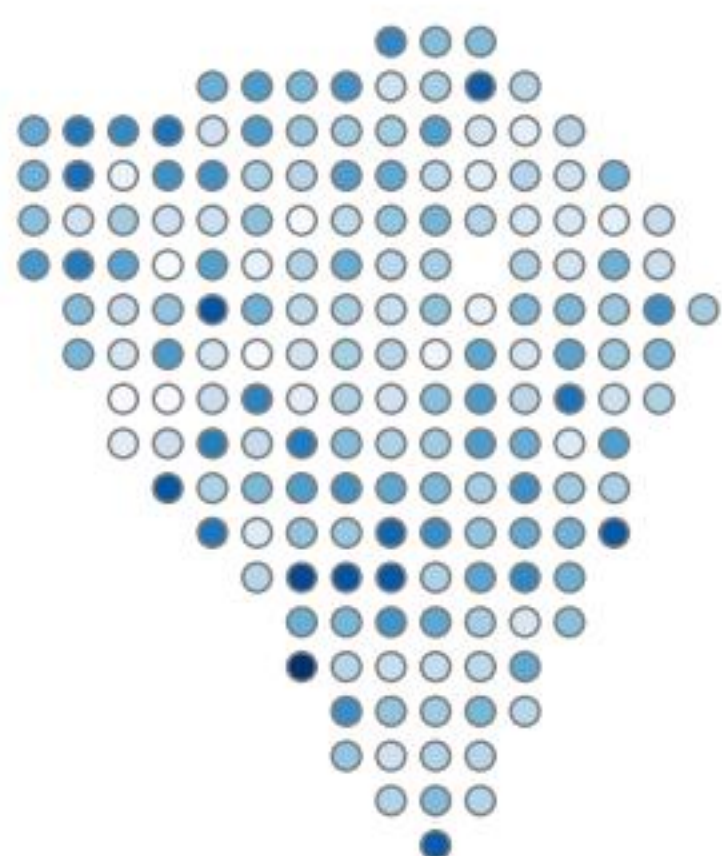

CAFs

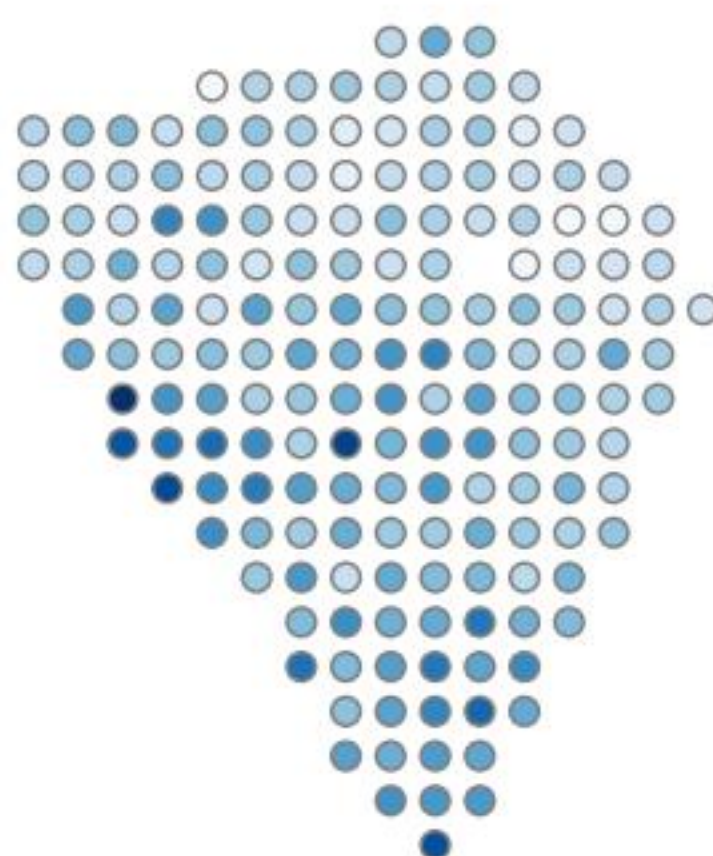

Endothelial

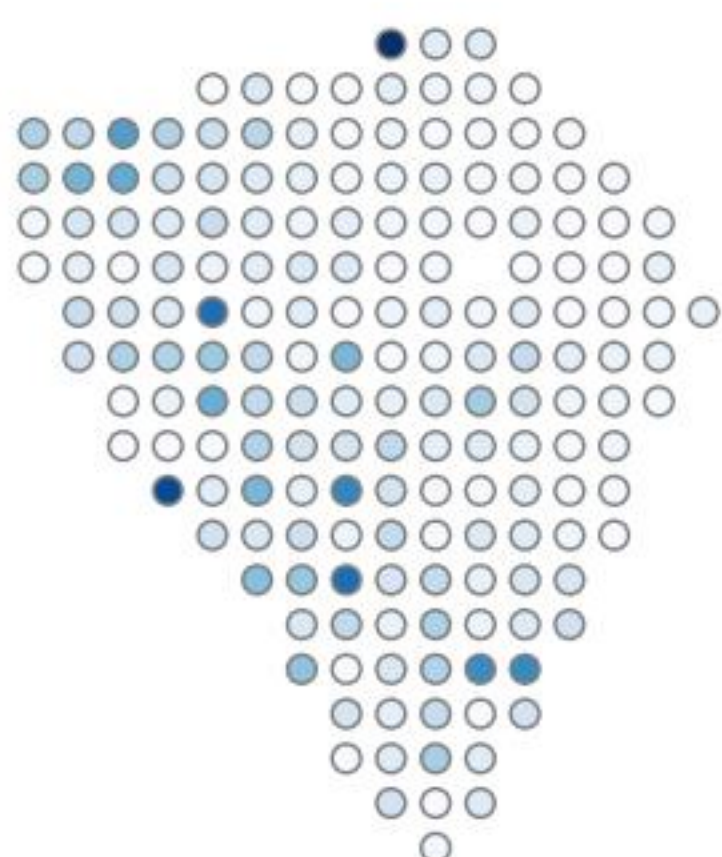

Epithelial

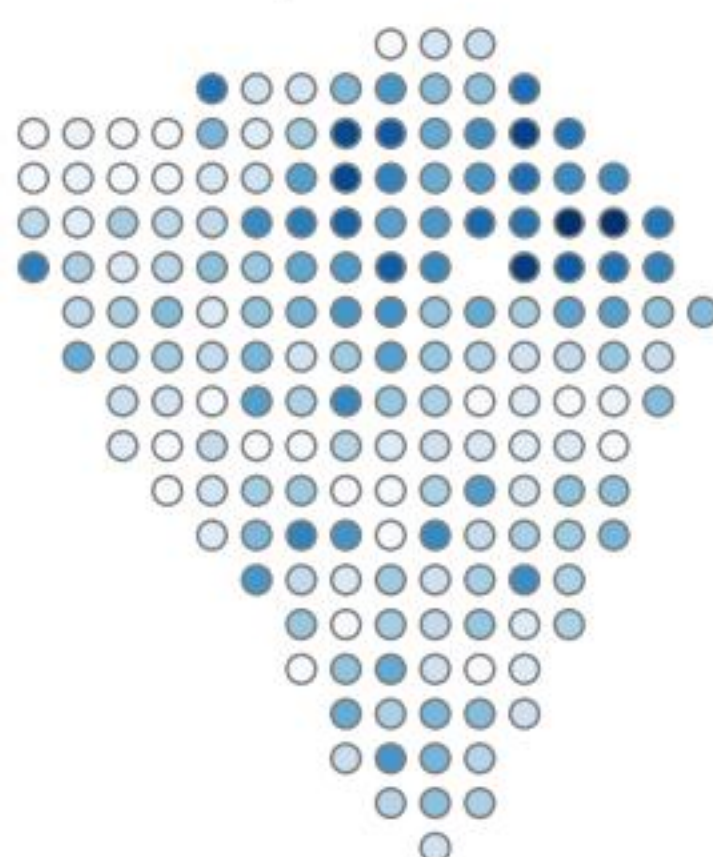

Myeloid

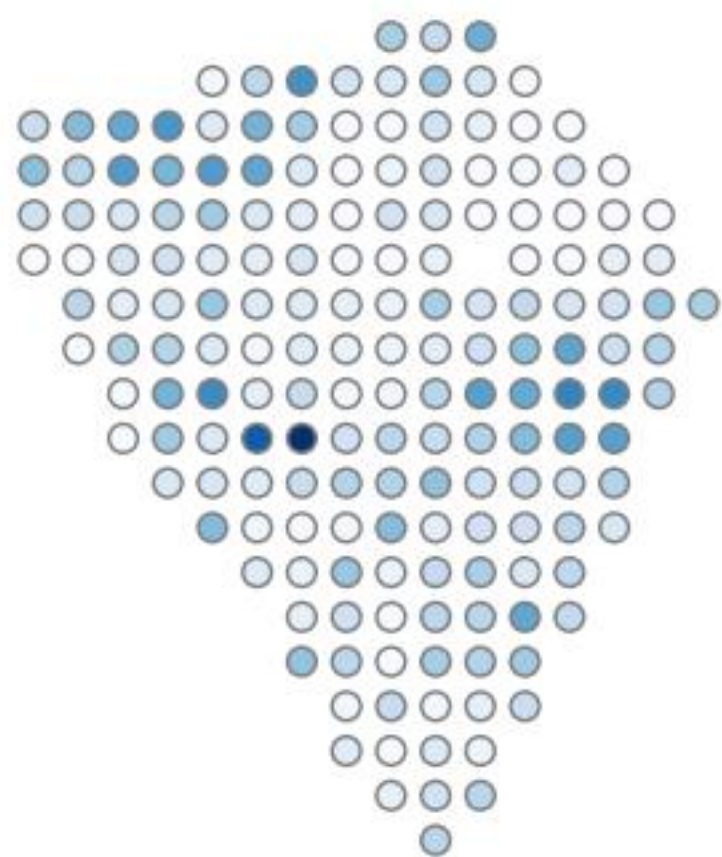

Plasma Cells

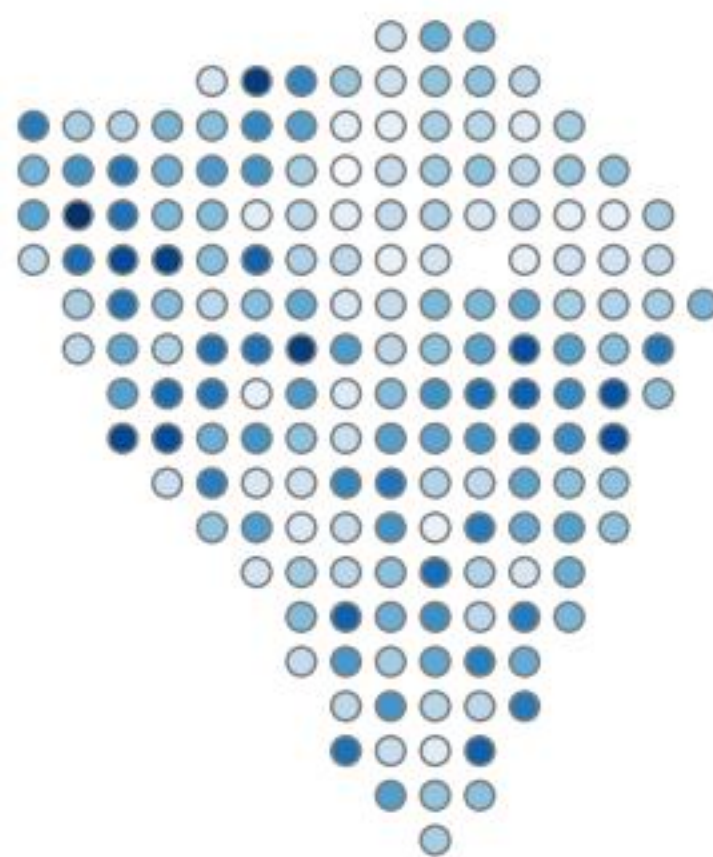

PVL

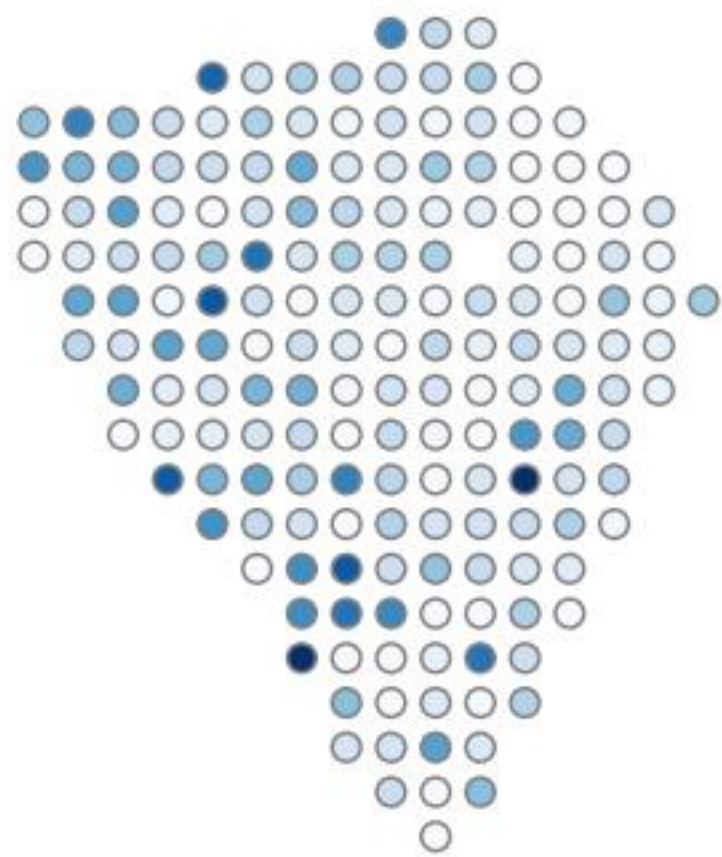

T-cells

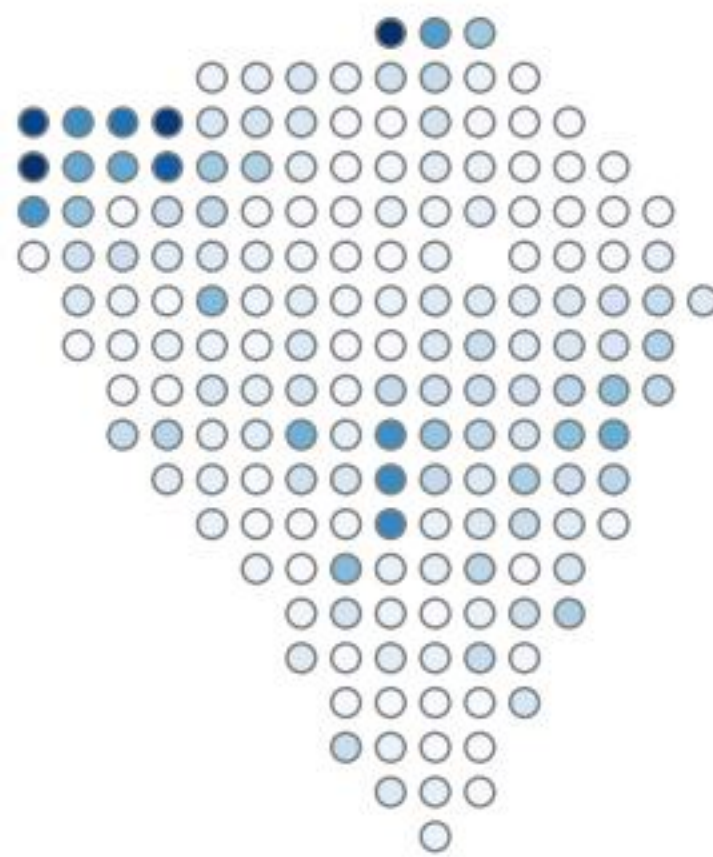

# major\_G2

B-cells

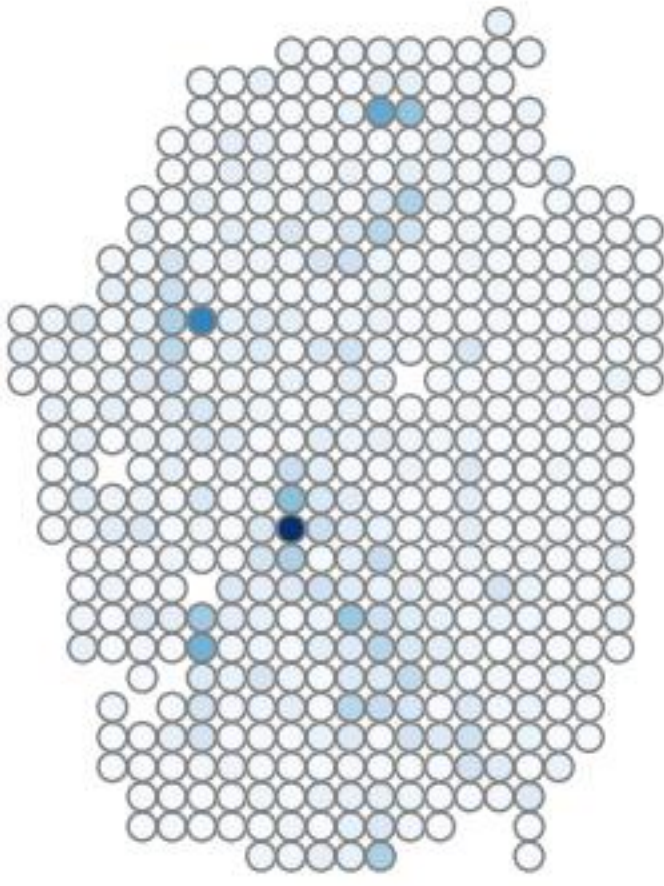

CAFs

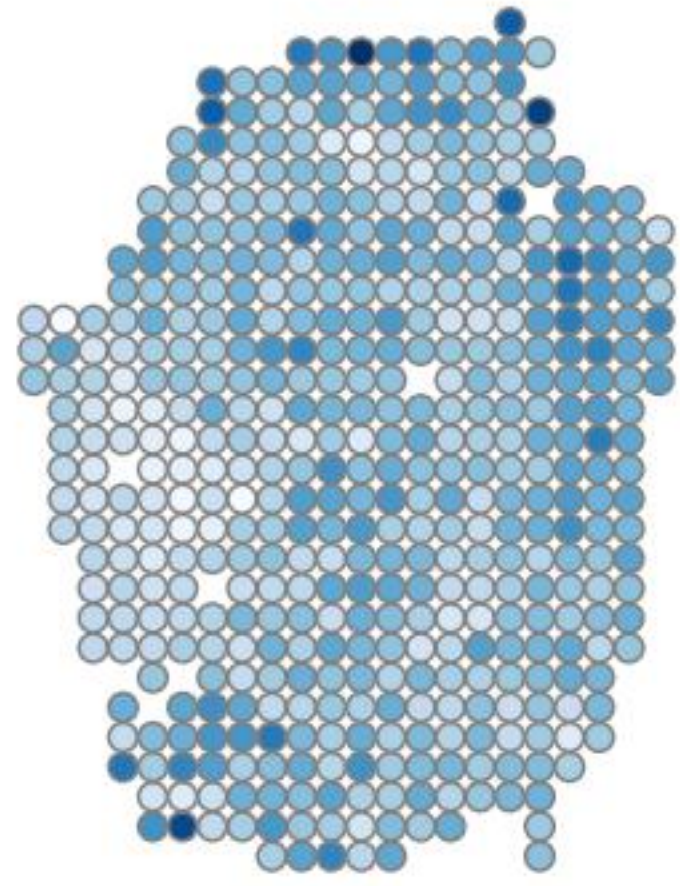

Endothelial

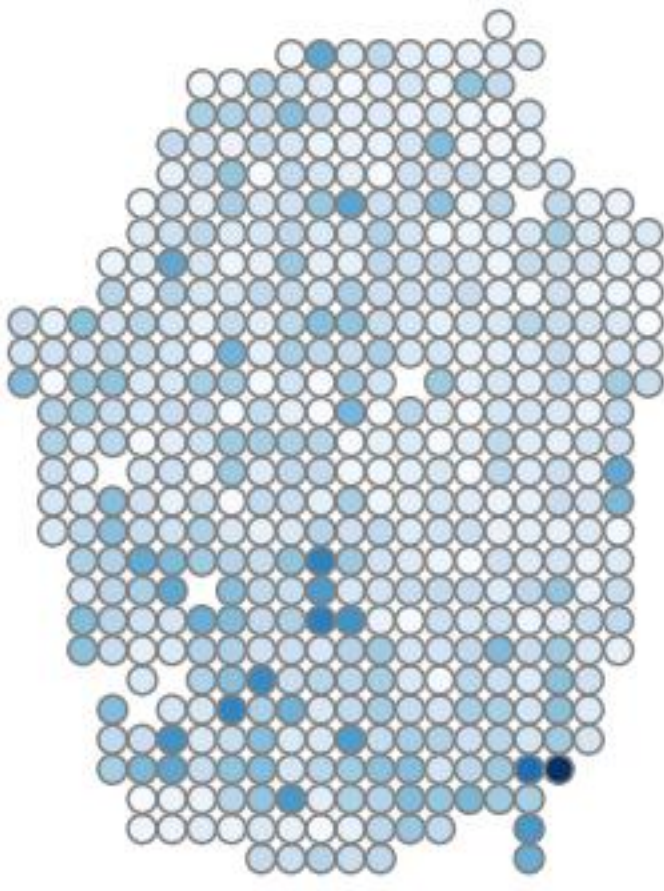

Epithelial

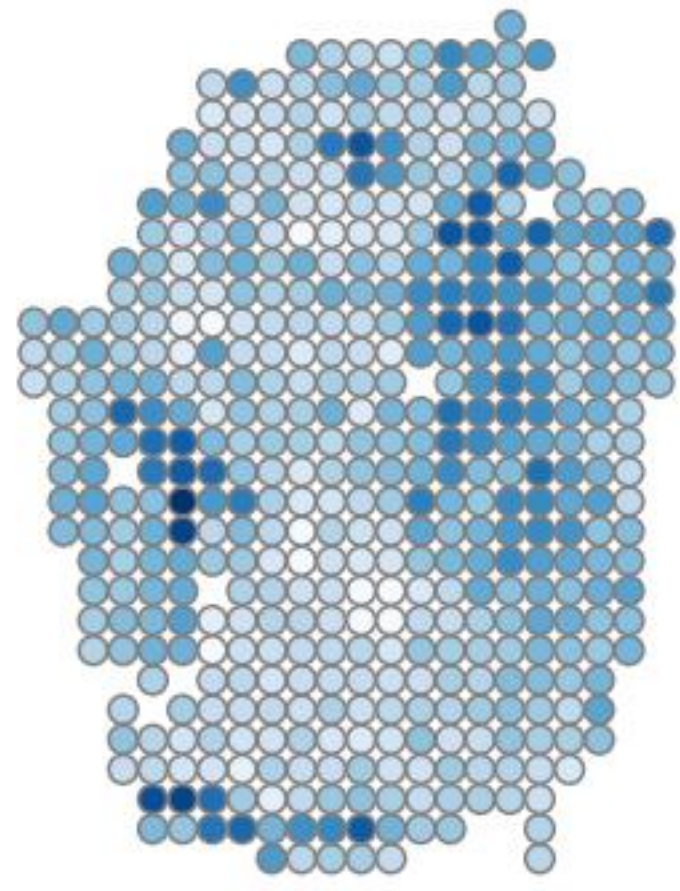

Myeloid

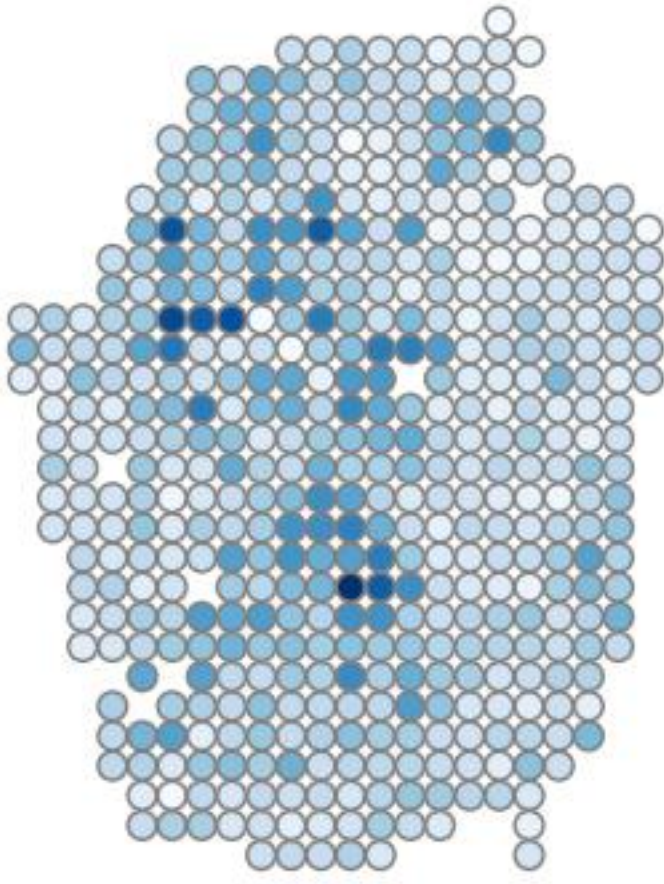

Plasma Cells

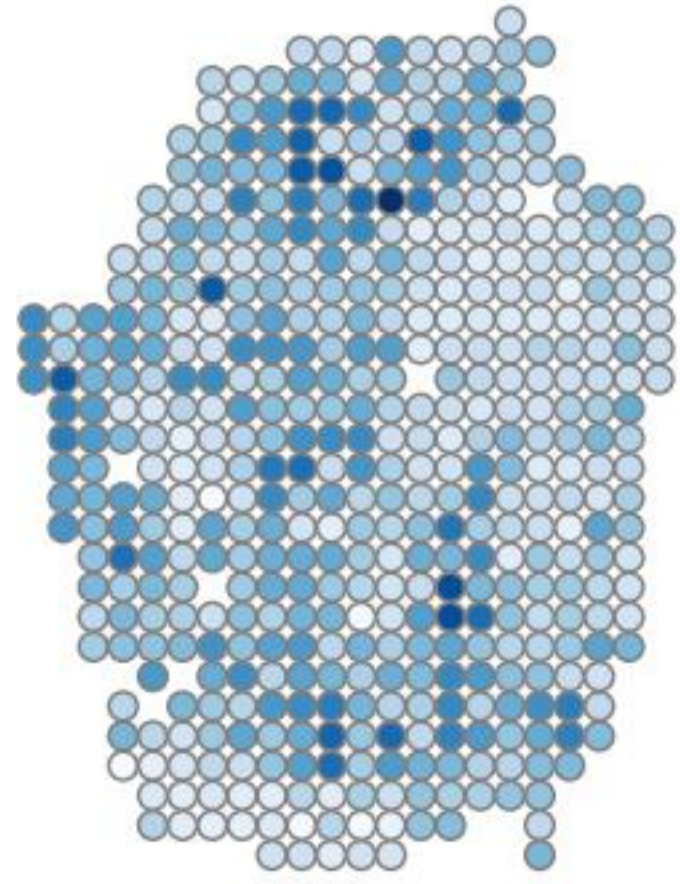

PVL

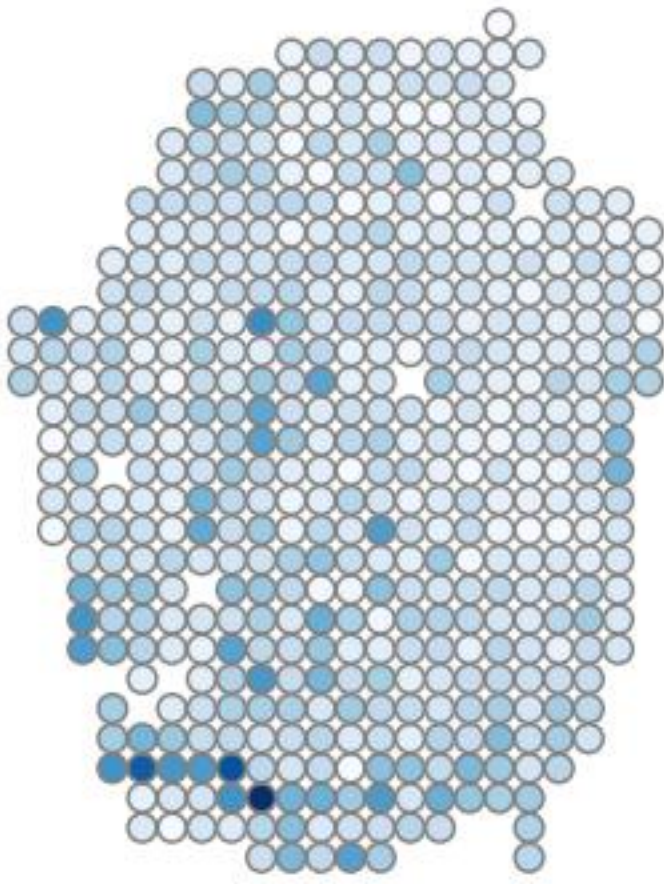

T-cells

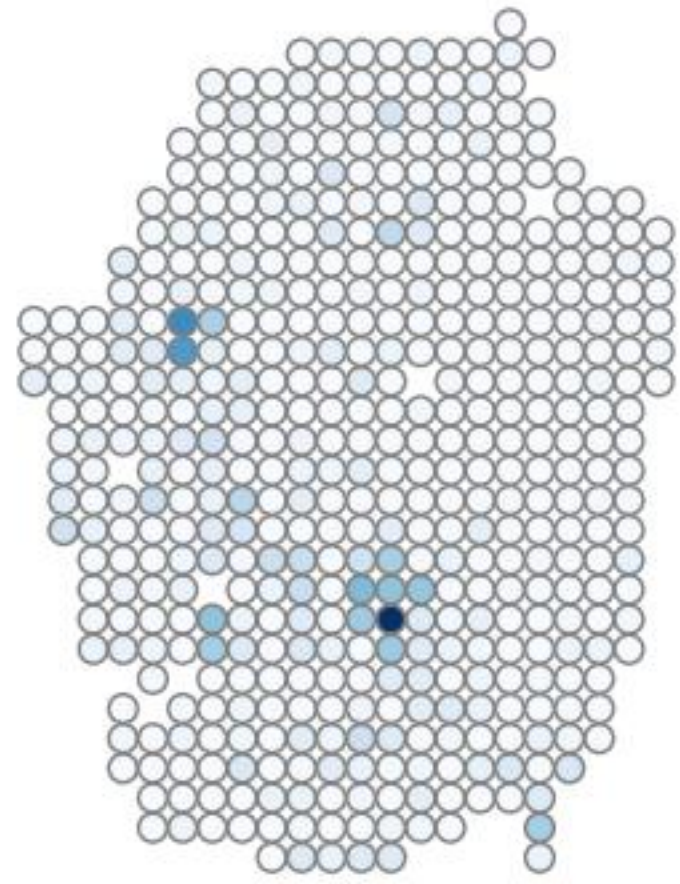

# minor\_E2

B-cells Memory

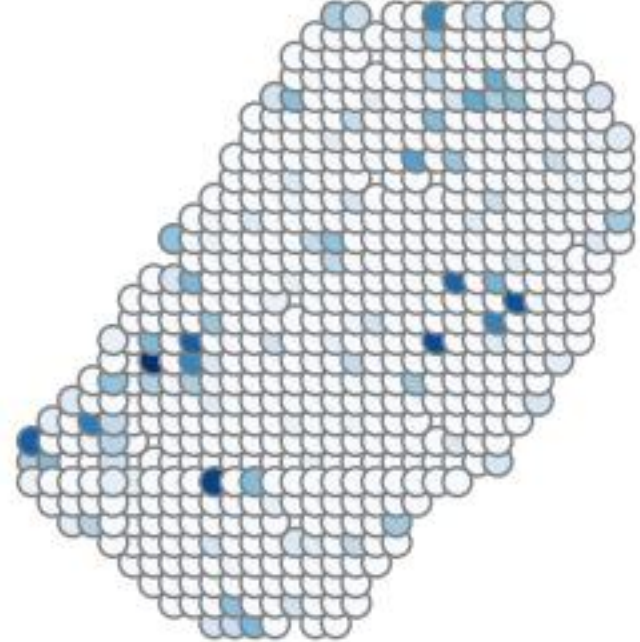

B-cells Naive

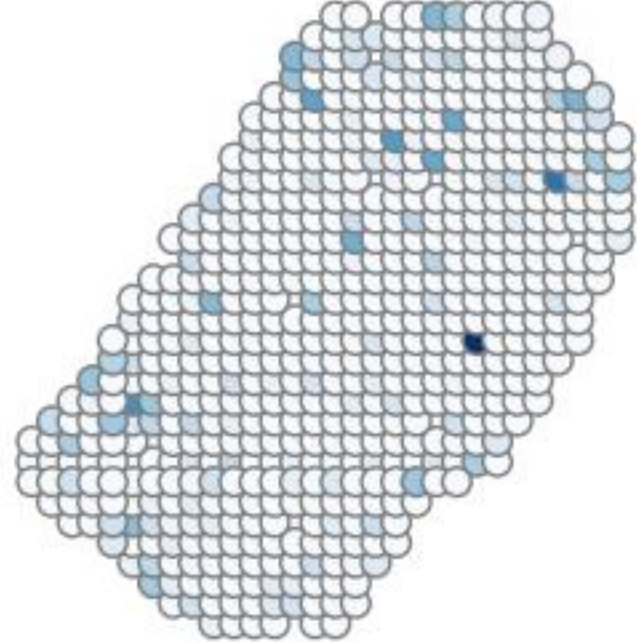

CAFs MSC/iCAF-like

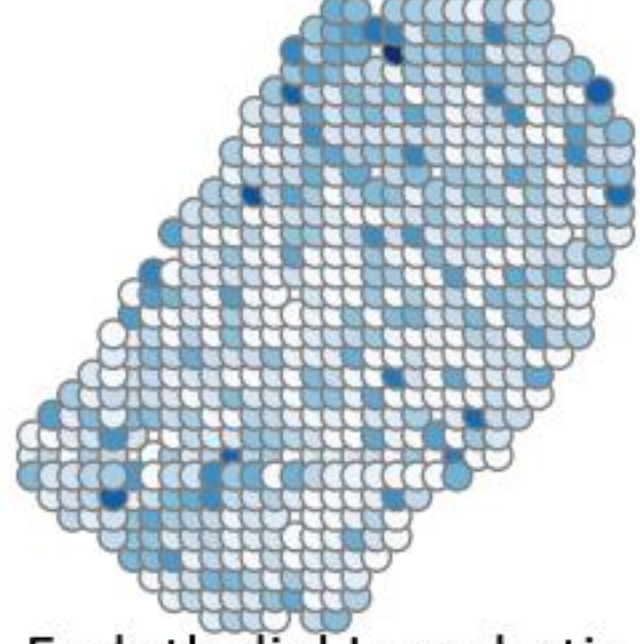

CAFs myCAF-like

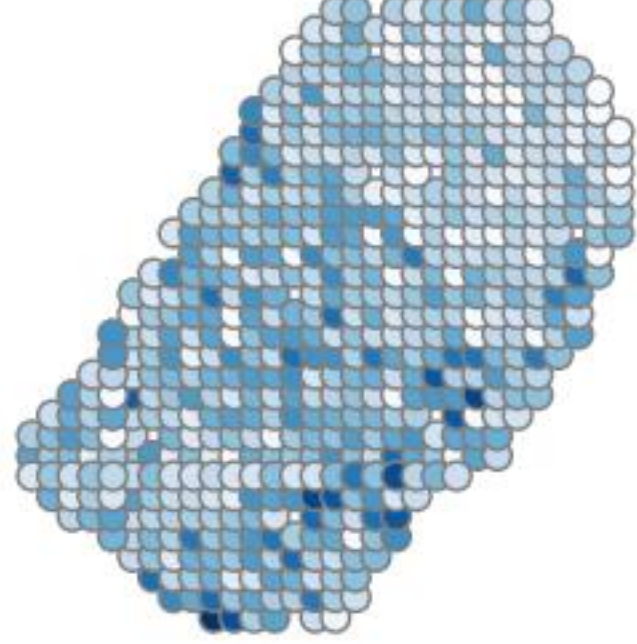

Endothelial Lymphatic  
LYVE1

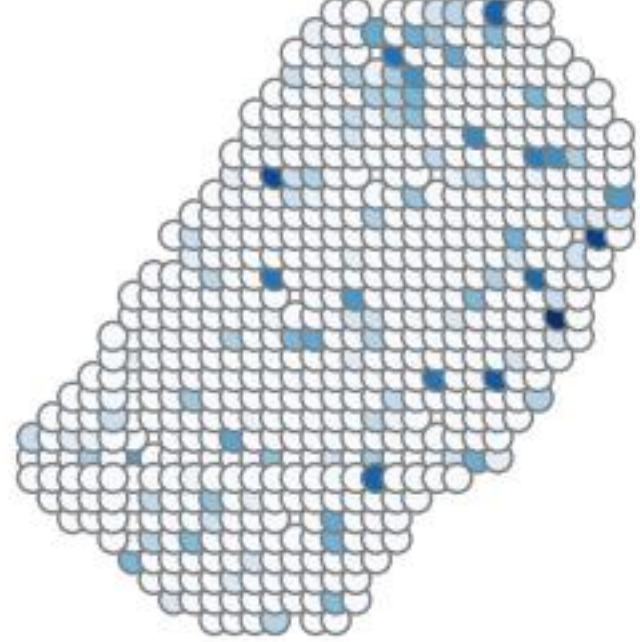

Endothelial RGS5

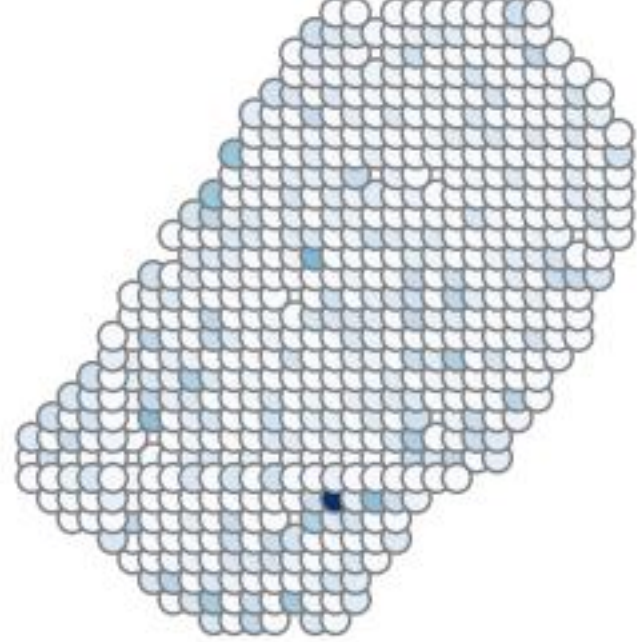

Endothelial CXCL12

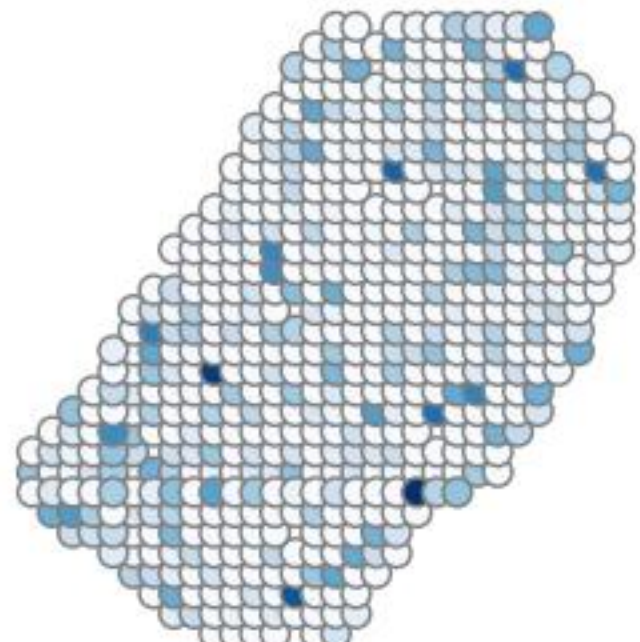

Endothelial ACKR1

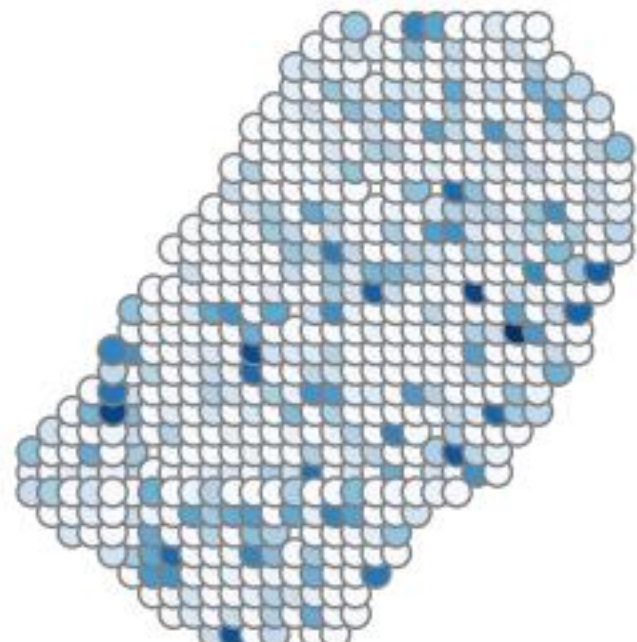

Cancer Epithelial

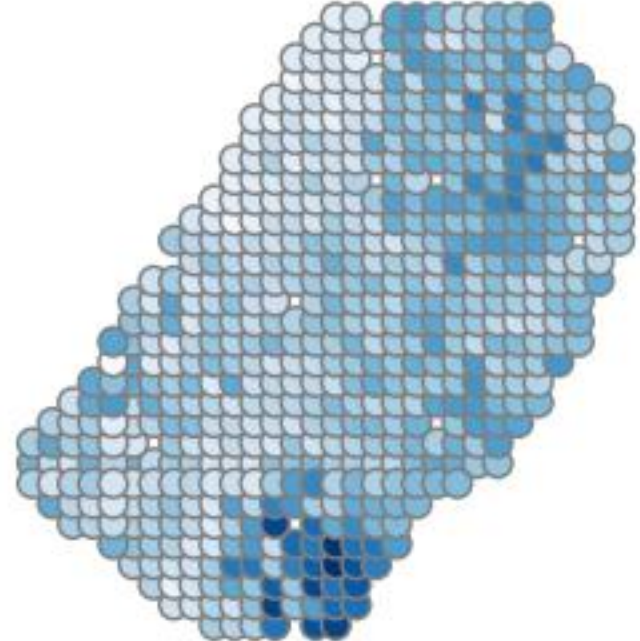

Normal Epithelial

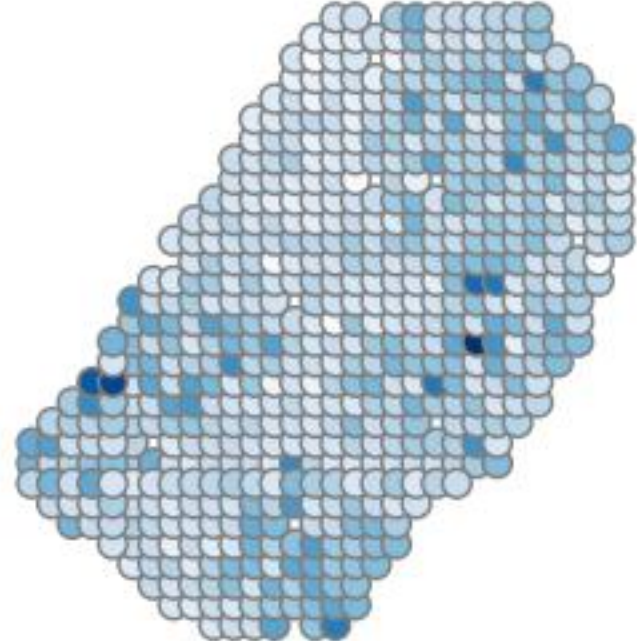

Cycling Myeloid

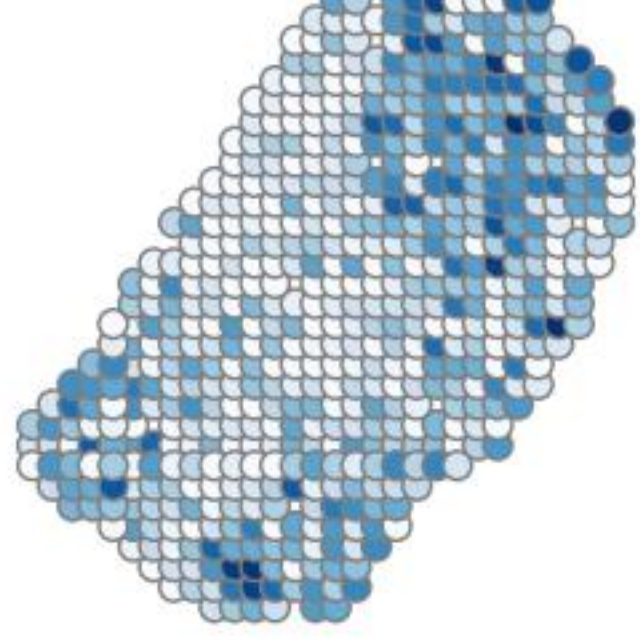

DCs

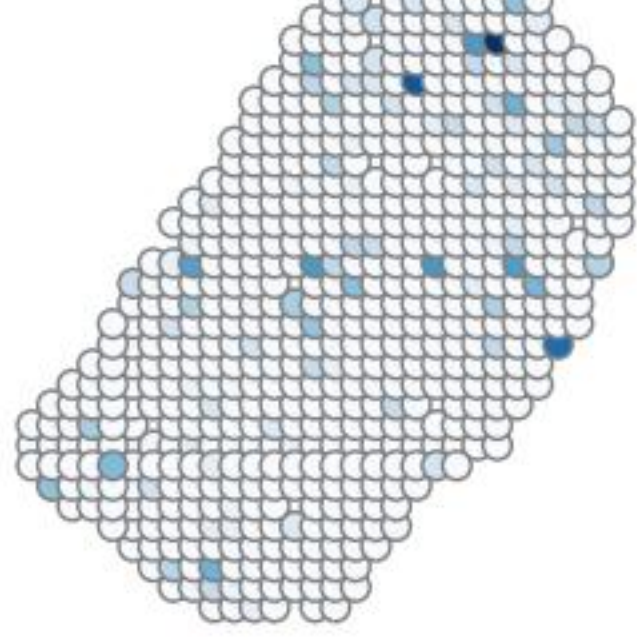

Macrophages

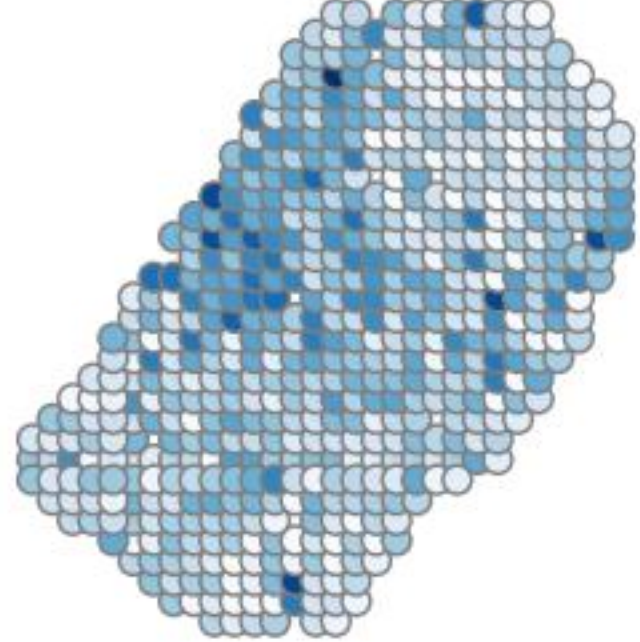

Monocytes

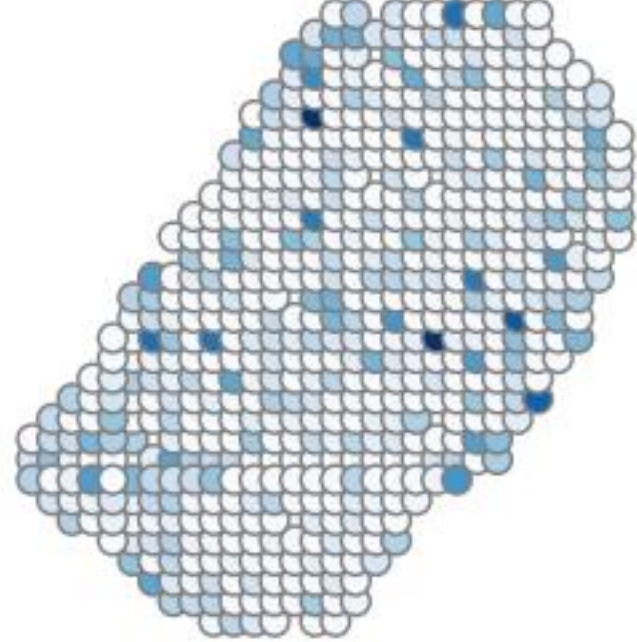

Plasma Cells

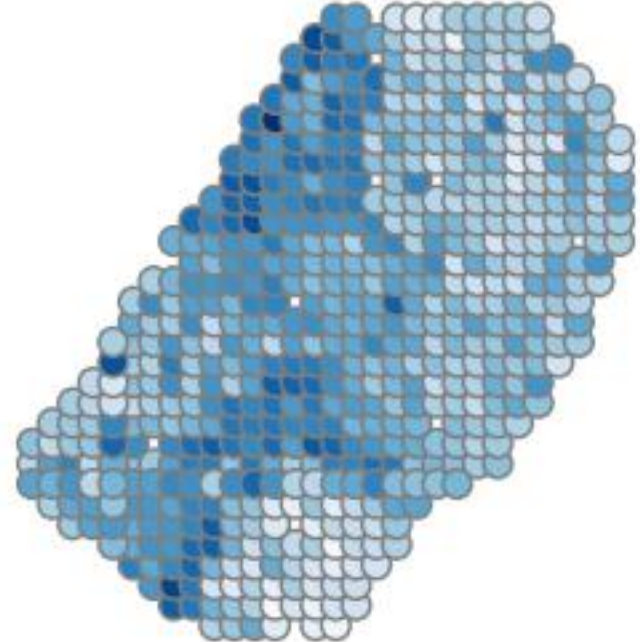

PVL Differentiated

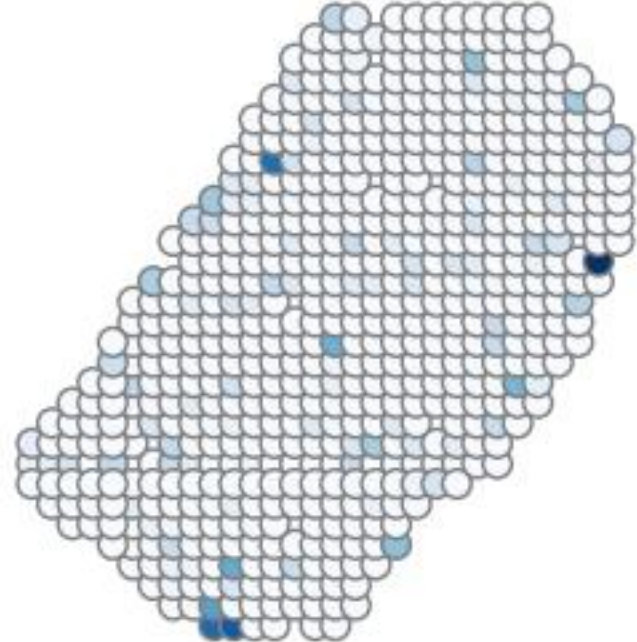

PVL Immature

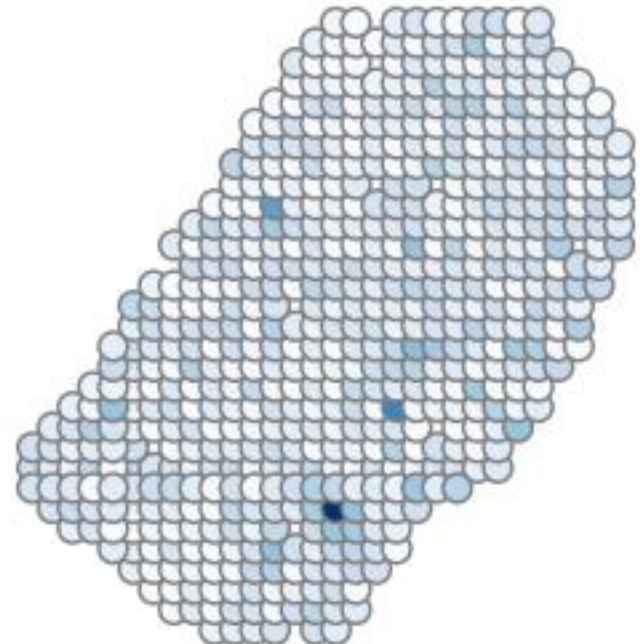

CD4+ T-cells

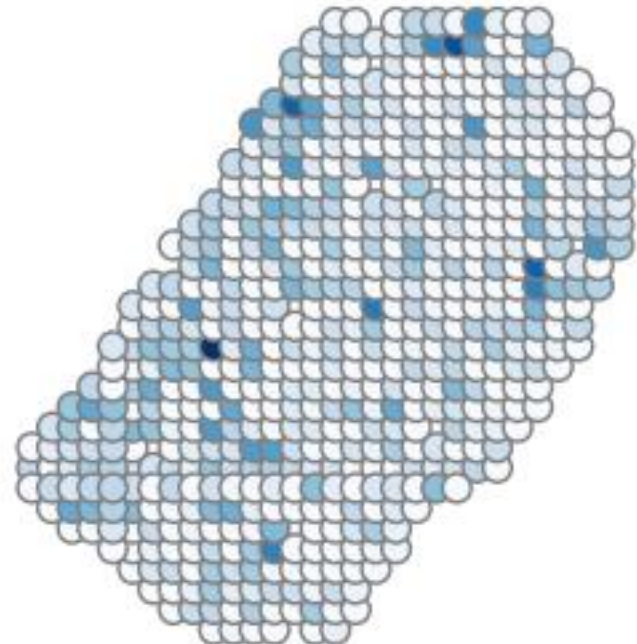

CD8+ T-cells

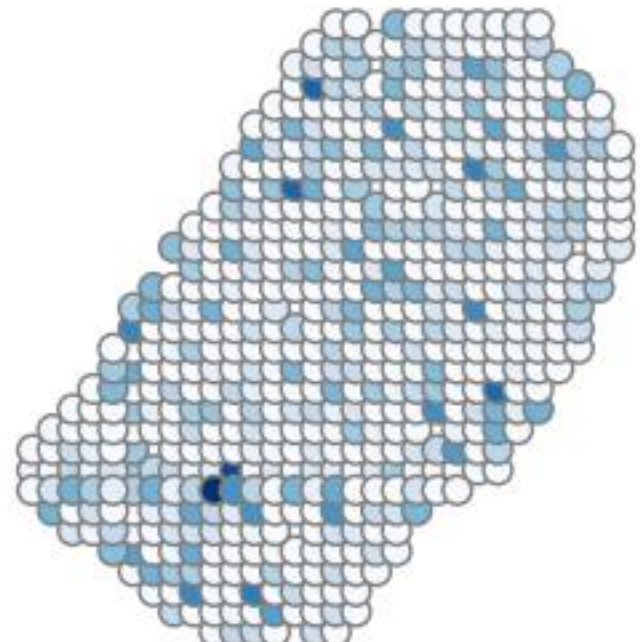

Cycling T-cells

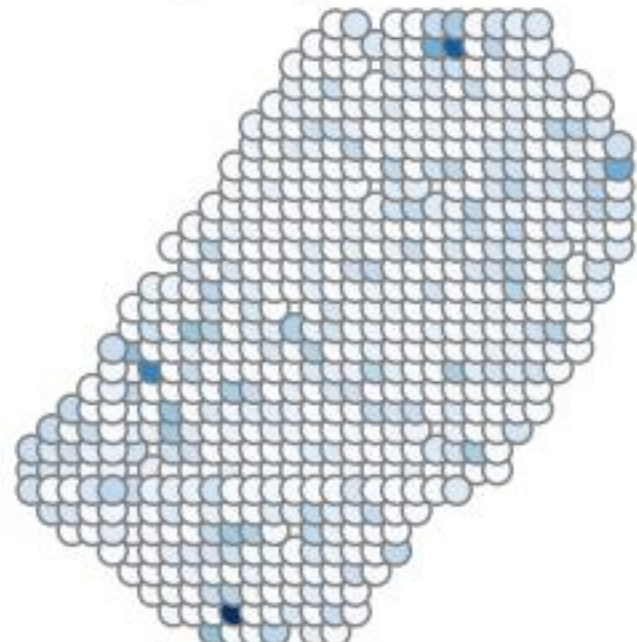

NK cells

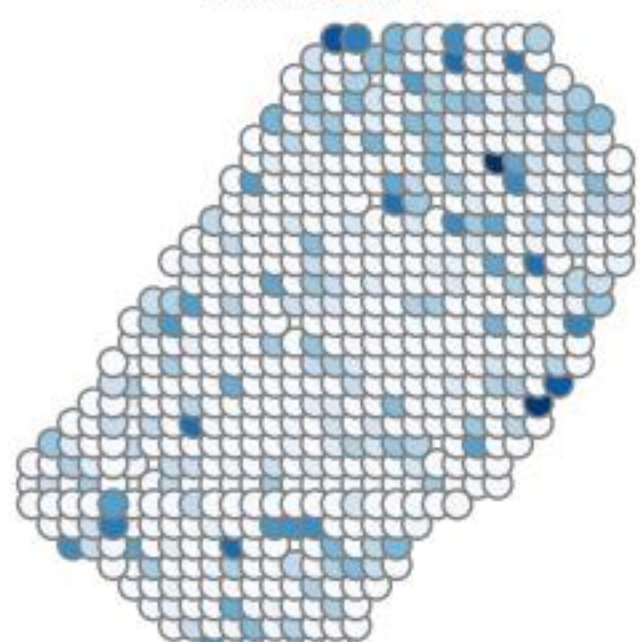

NKT cells

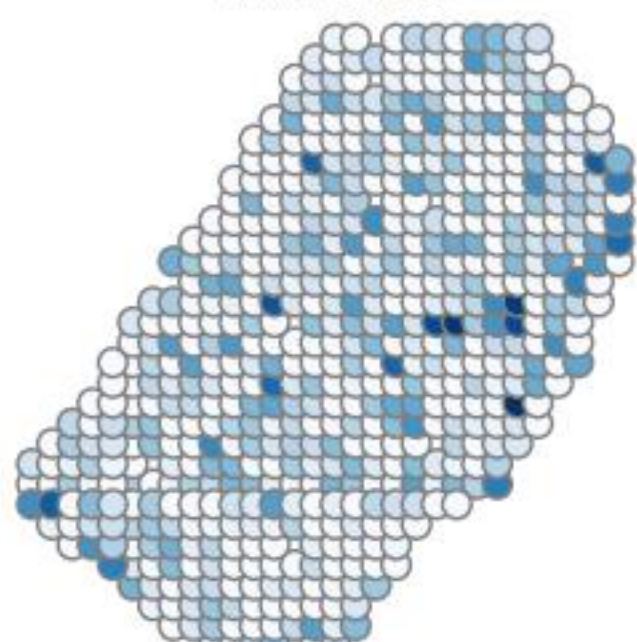

# minor\_G2

B-cells Memory

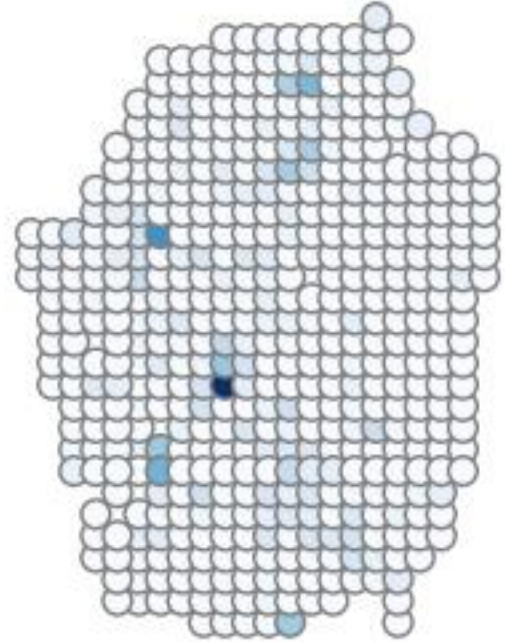

B-cells Naive

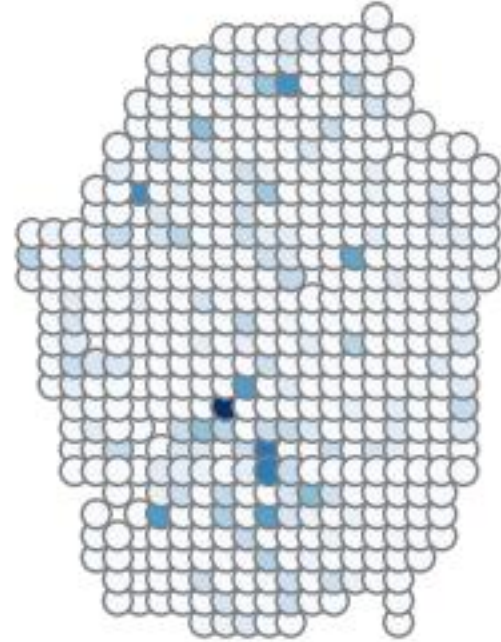

CAFs MSC/iCAF-like

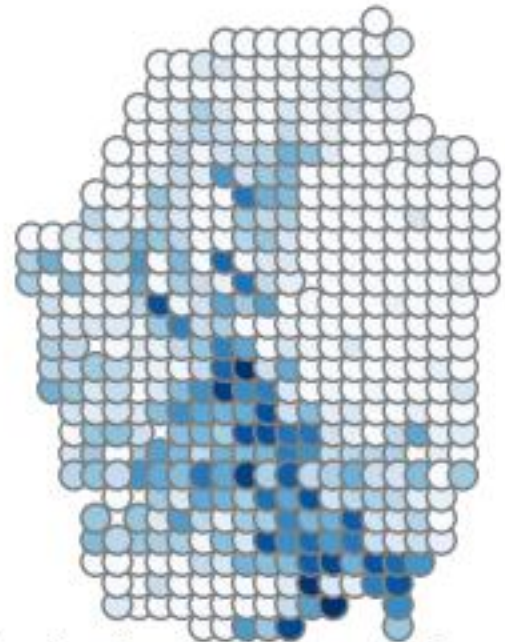

CAFs myCAF-like

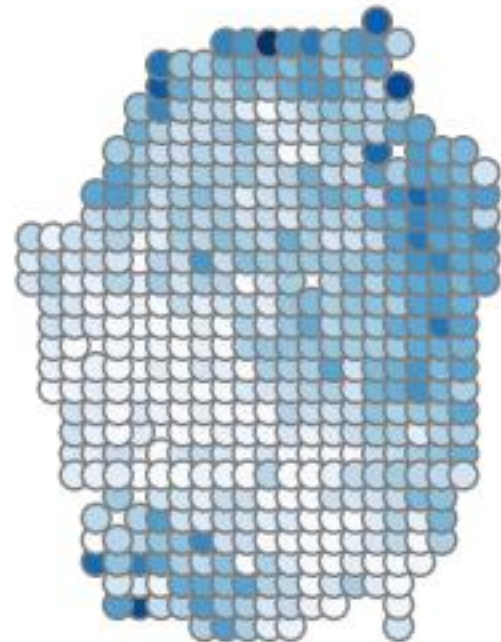

Endothelial Lymphatic  
LYVE1

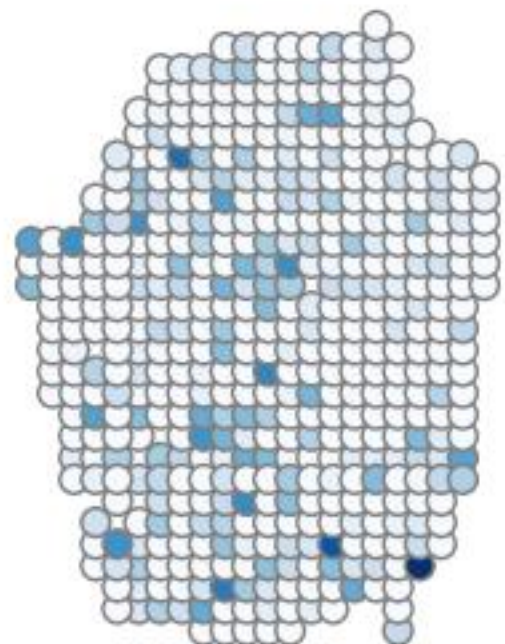

Endothelial RGS5

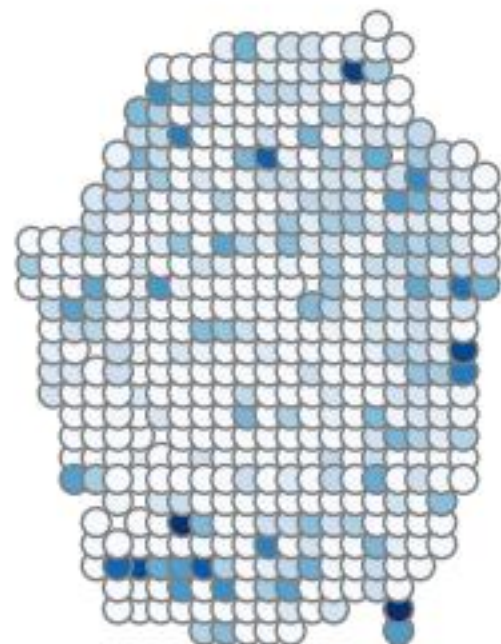

Endothelial CXCL12

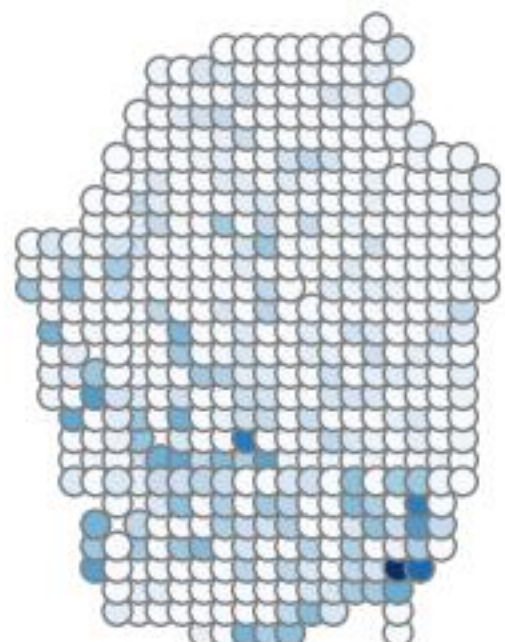

Endothelial ACKR1

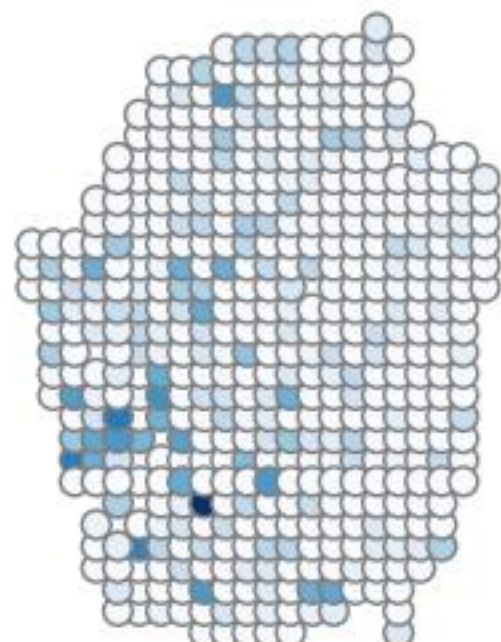

Cancer Epithelial

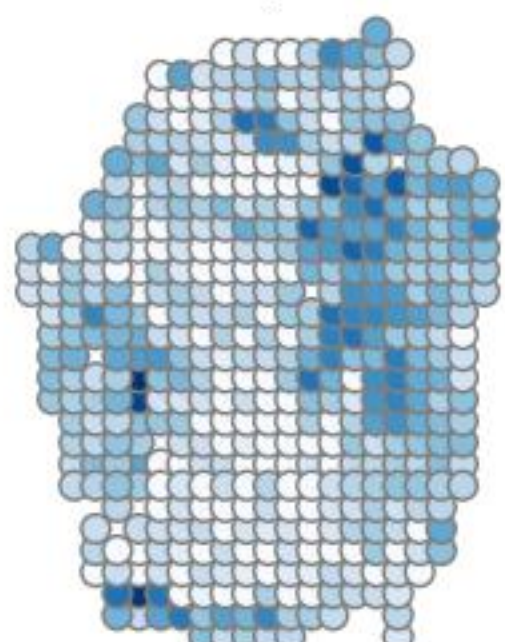

Normal Epithelial

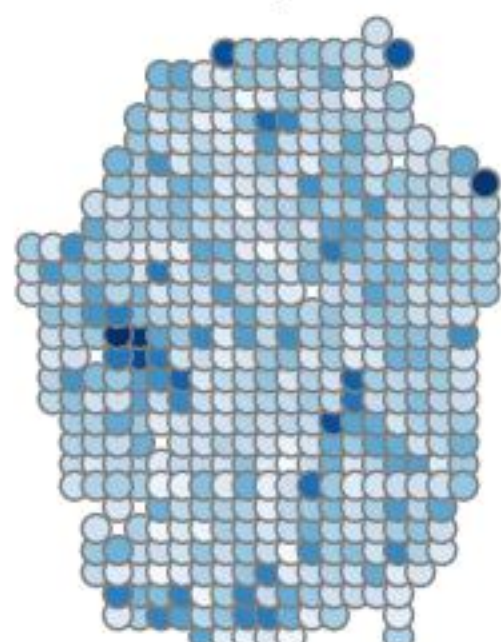

Cycling Myeloid

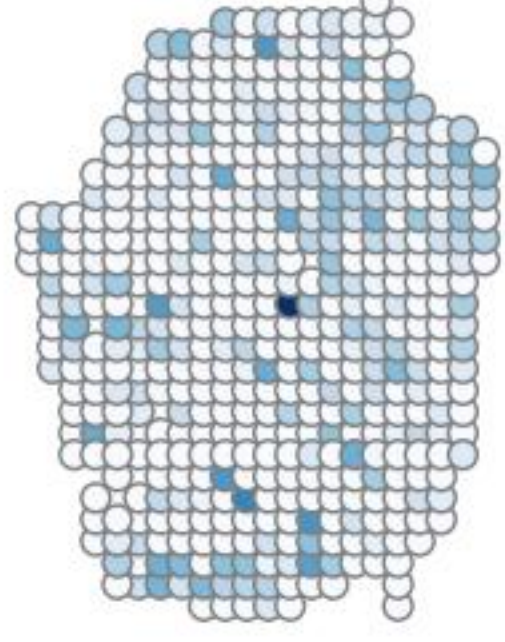

DCs

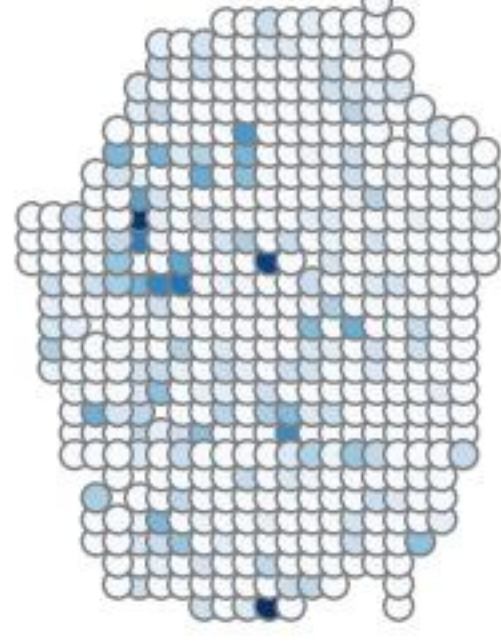

Macrophages

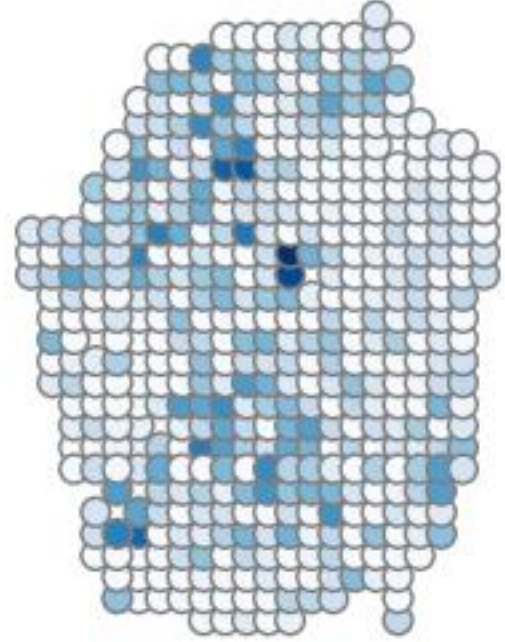

Monocytes

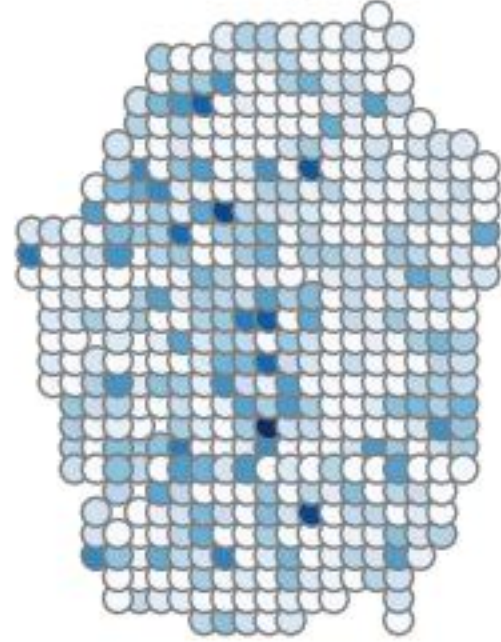

Plasma Cells

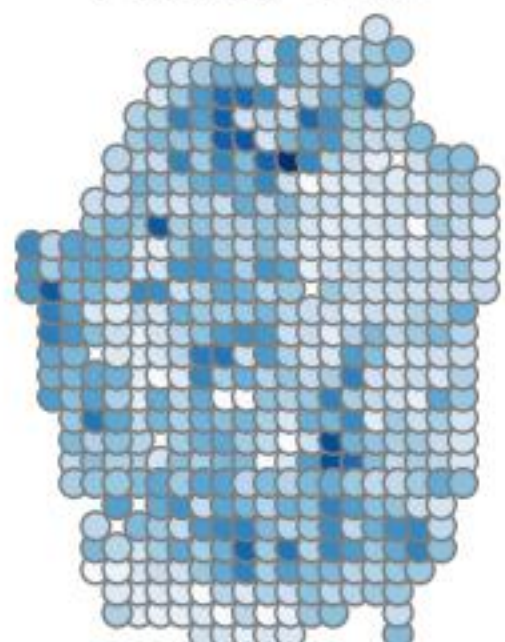

PVL Differentiated

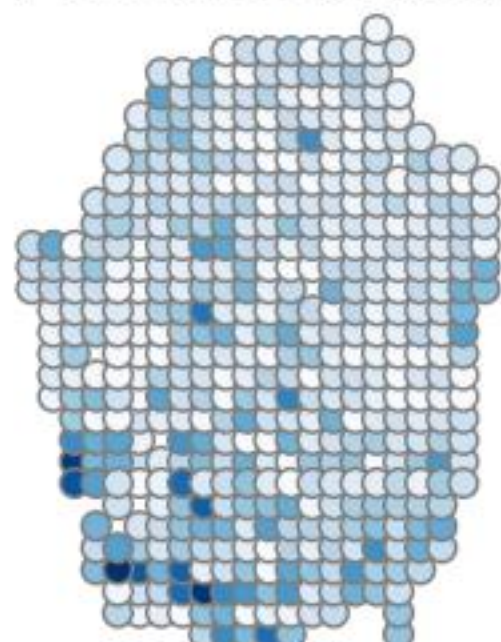

PVL Immature

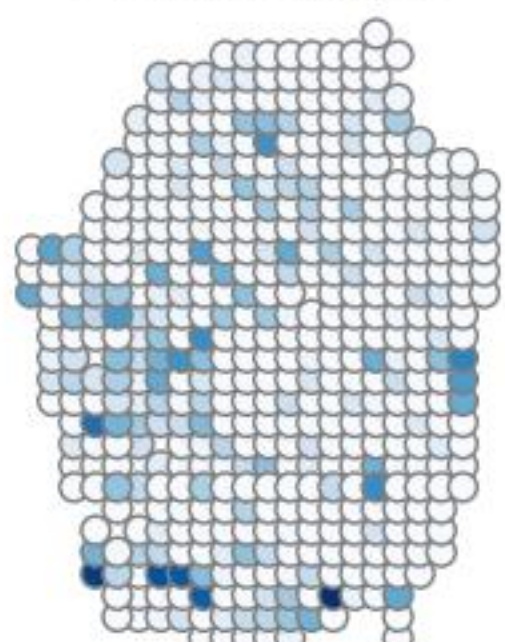

CD4+ T-cells

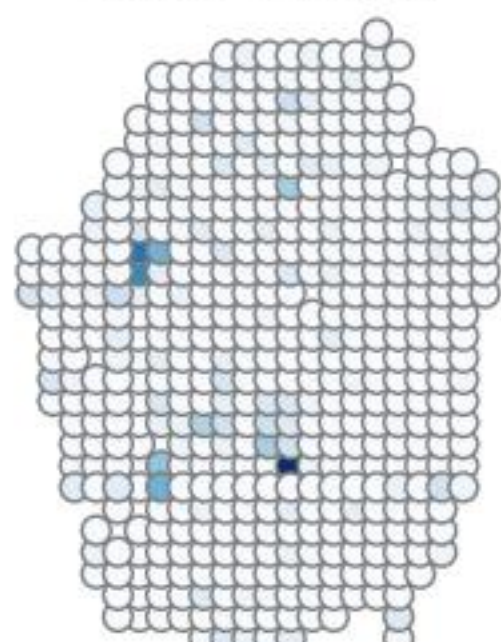

CD8+ T-cells

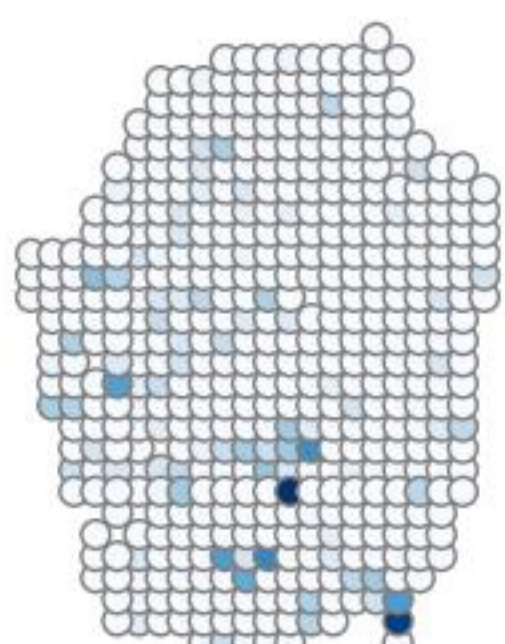

Cycling T-cells

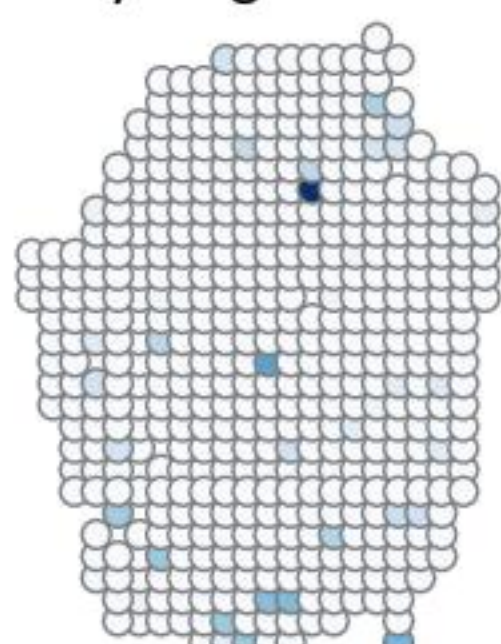

NK cells

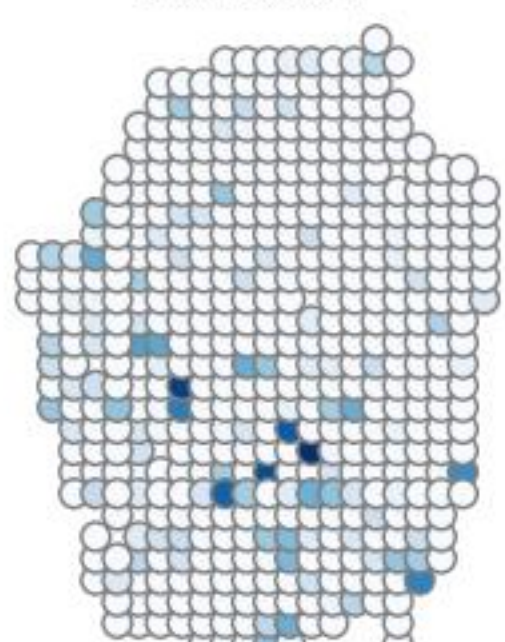

NKT cells

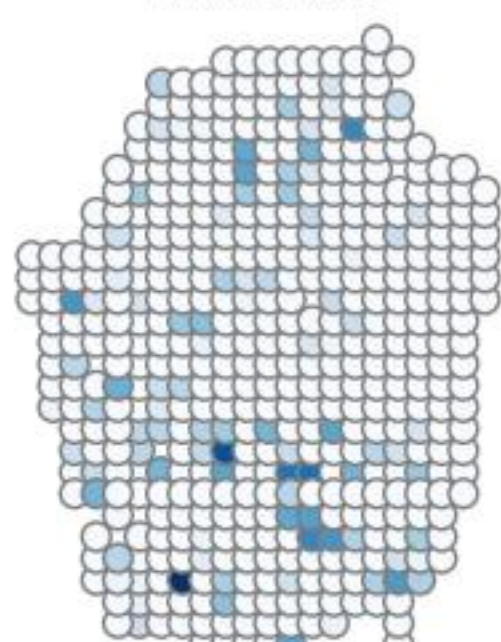

# minor\_C4

B-cells Memory

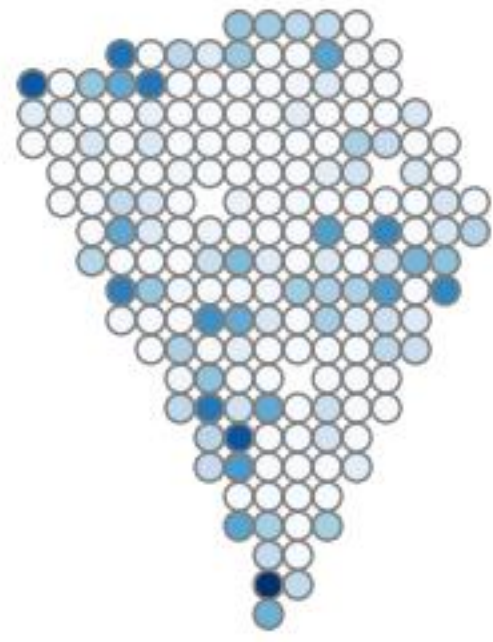

B-cells Naive

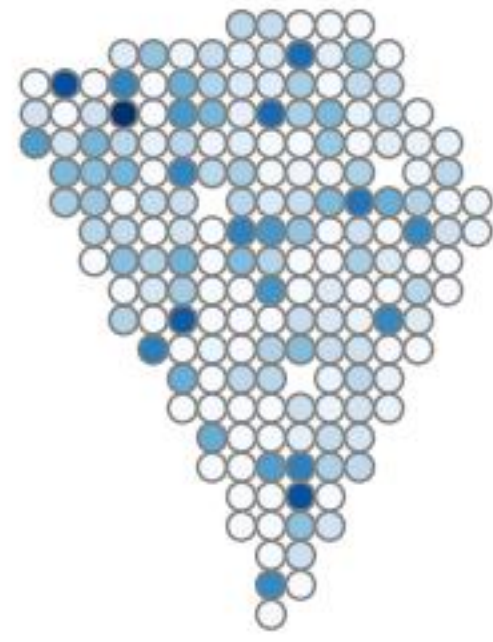

CAFs MSC/iCAF-like

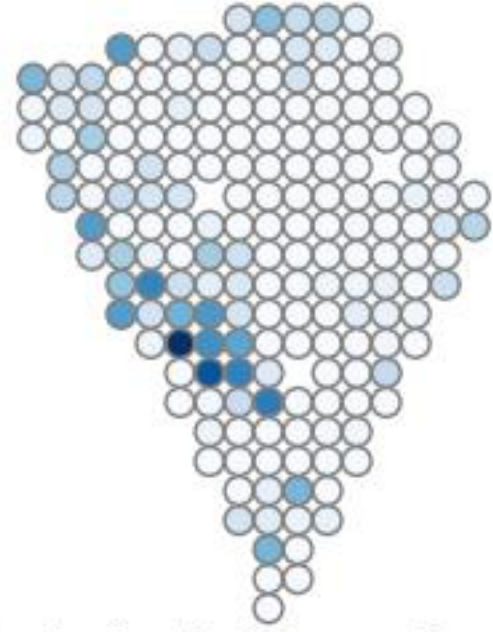

CAFs myCAF-like

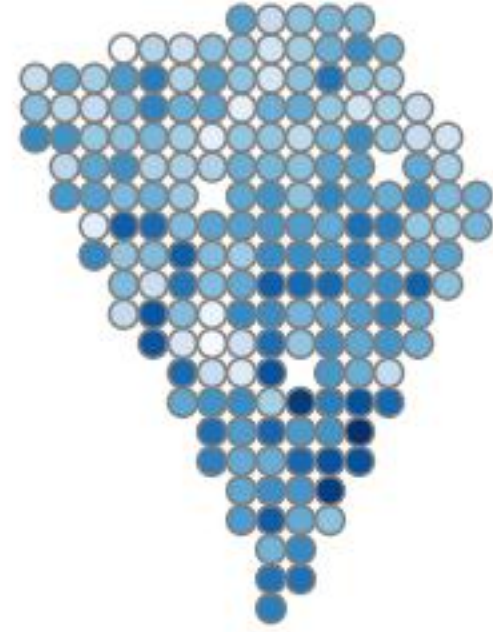

Endothelial Lymphatic  
LYVE1

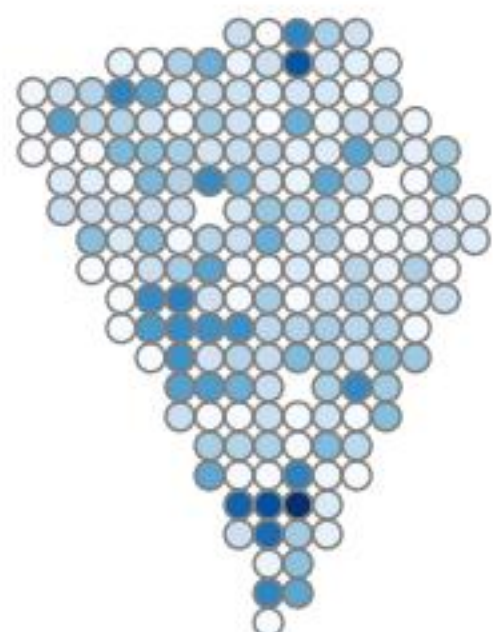

Endothelial RGS5

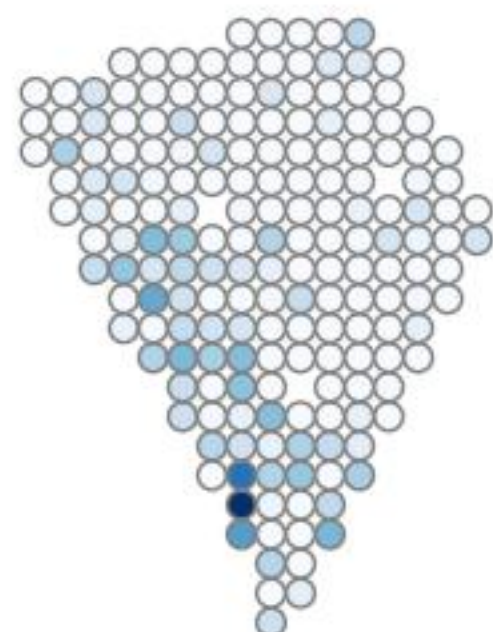

Endothelial CXCL12

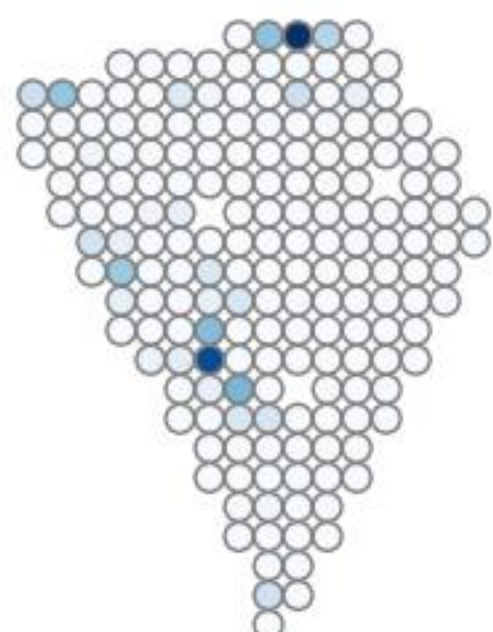

Endothelial ACKR1

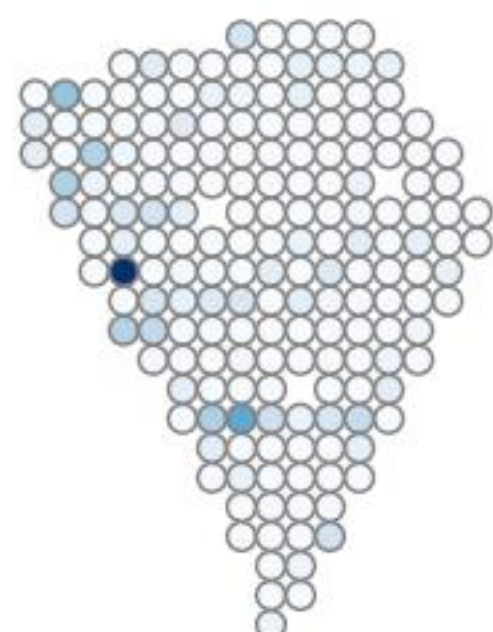

Cancer Epithelial

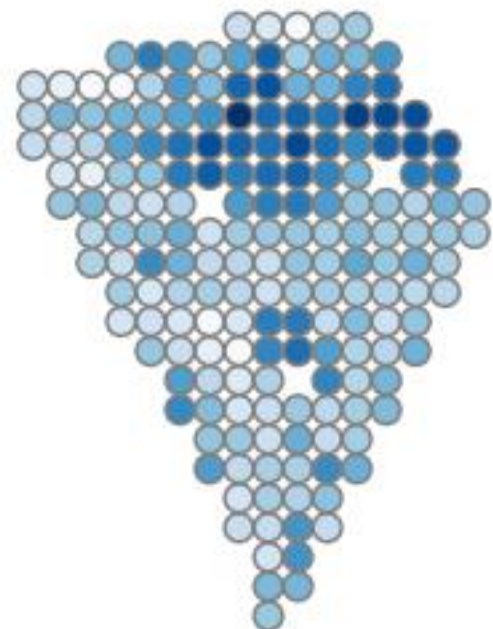

Normal Epithelial

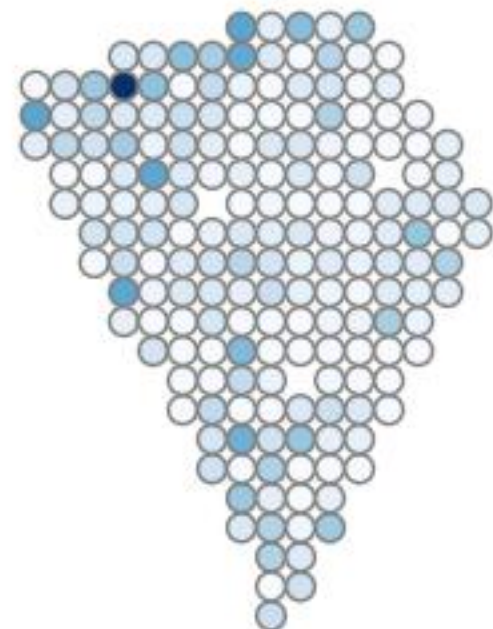

Cycling Myeloid

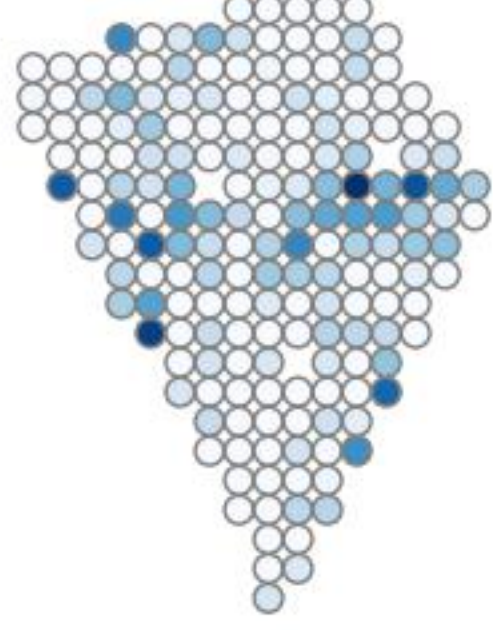

DCs

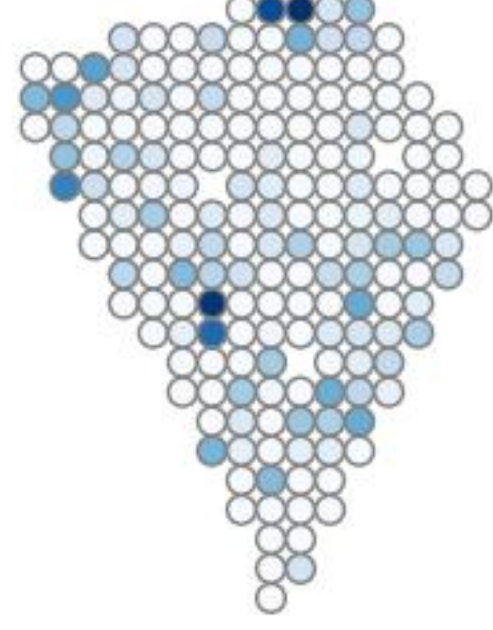

Macrophages

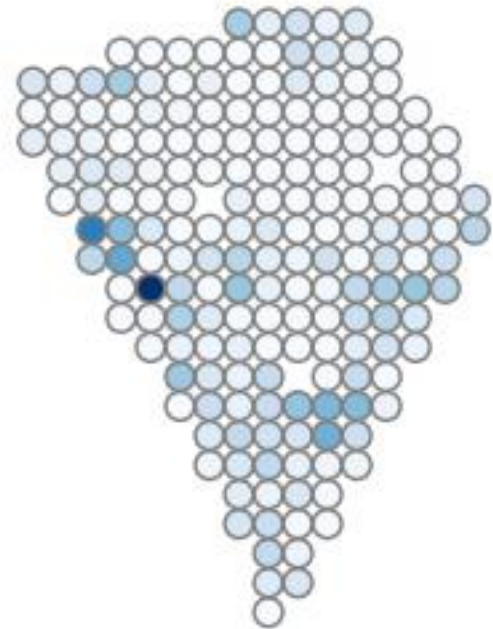

Monocytes

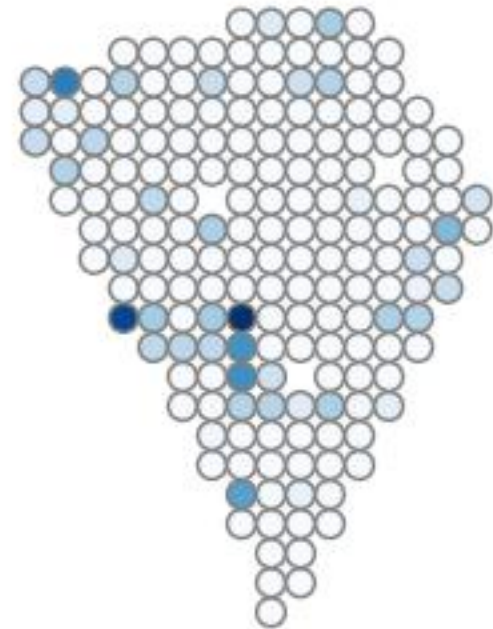

Plasma Cells

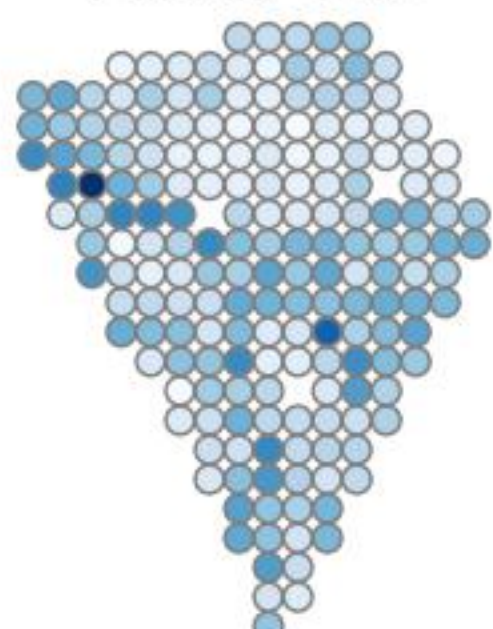

PVL Differentiated

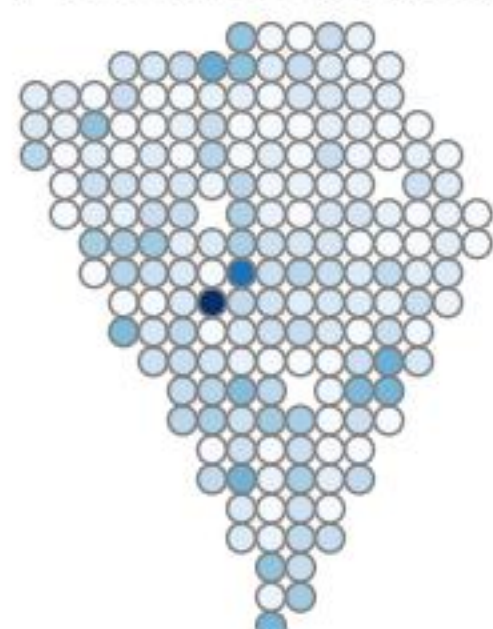

PVL Immature

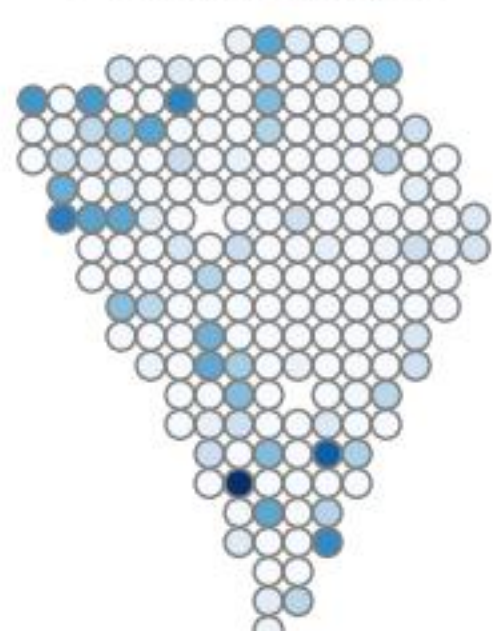

CD4+ T-cells

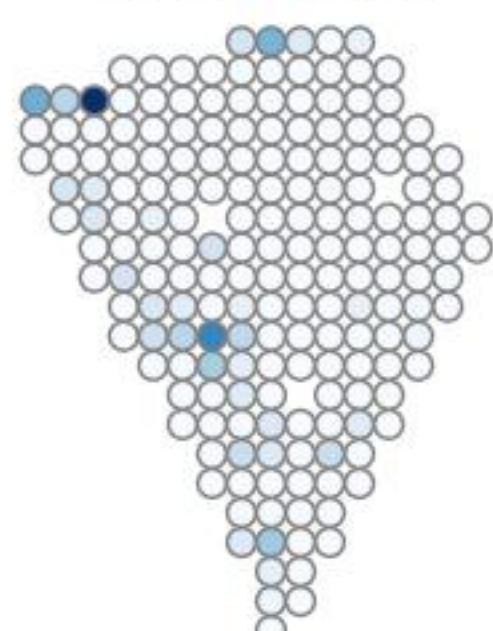

CD8+ T-cells

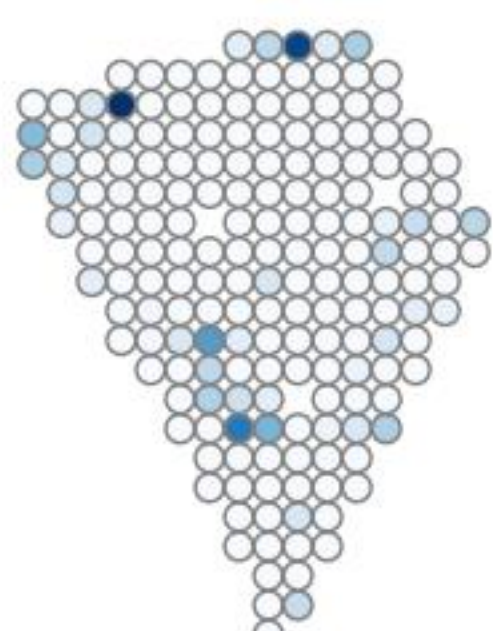

Cycling T-cells

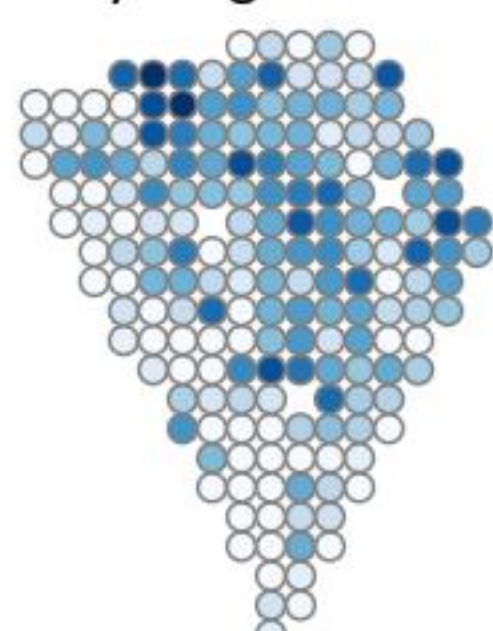

NK cells

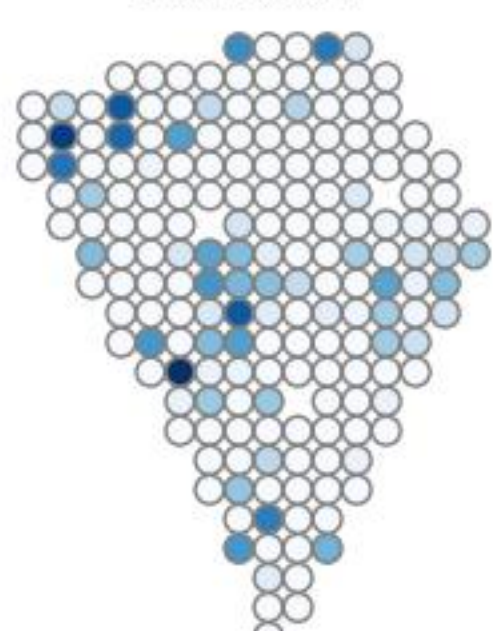

NKT cells

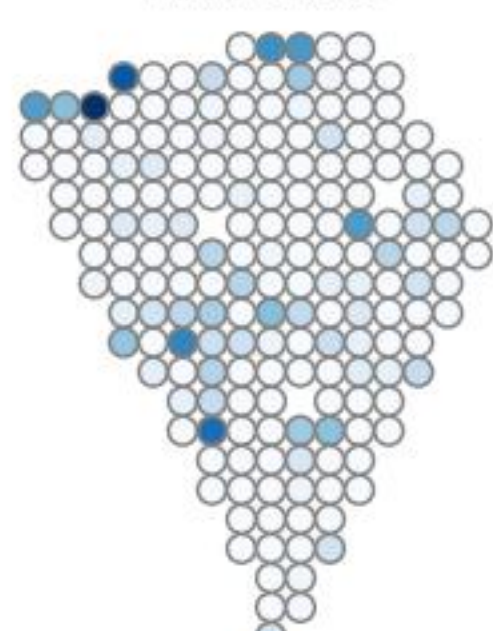

# minor\_C2

B-cells Memory

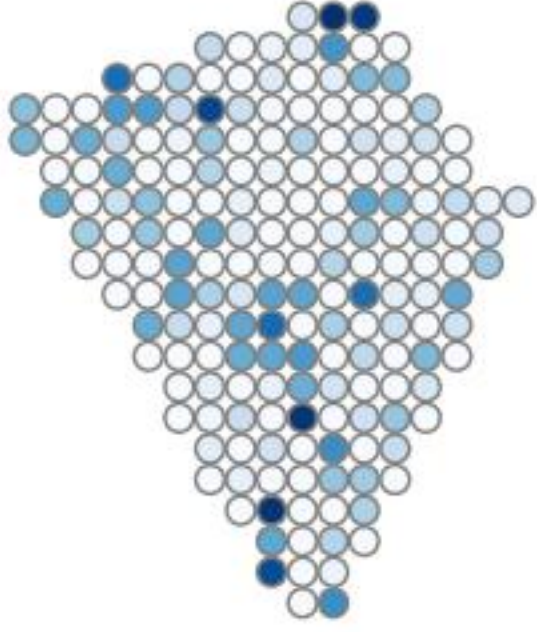

B-cells Naive

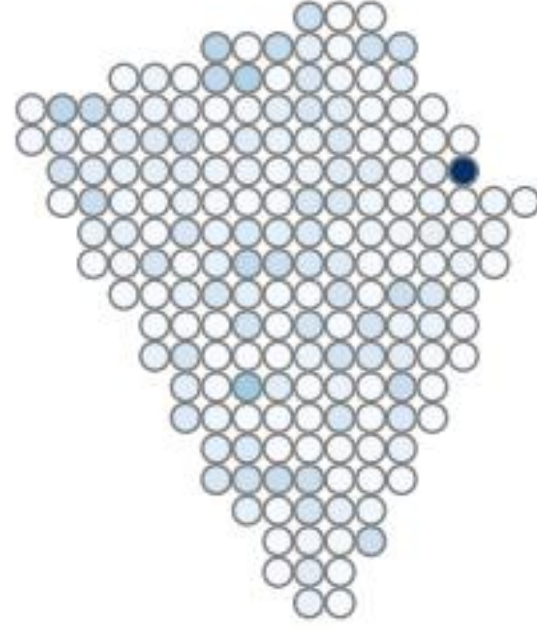

CAFs MSC/iCAF-like

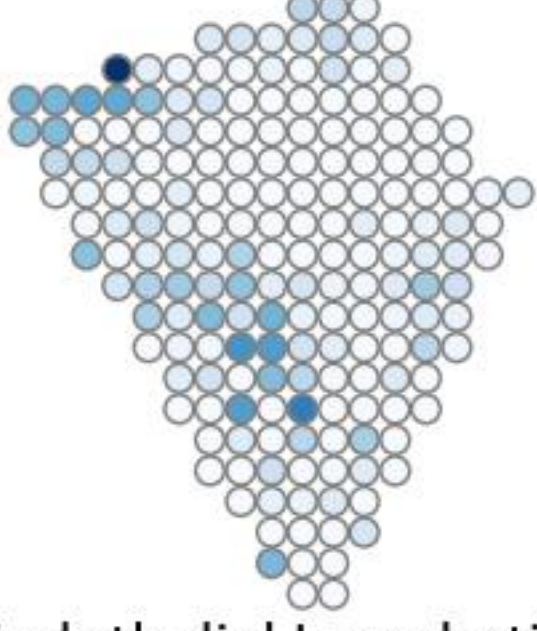

CAFs myCAF-like

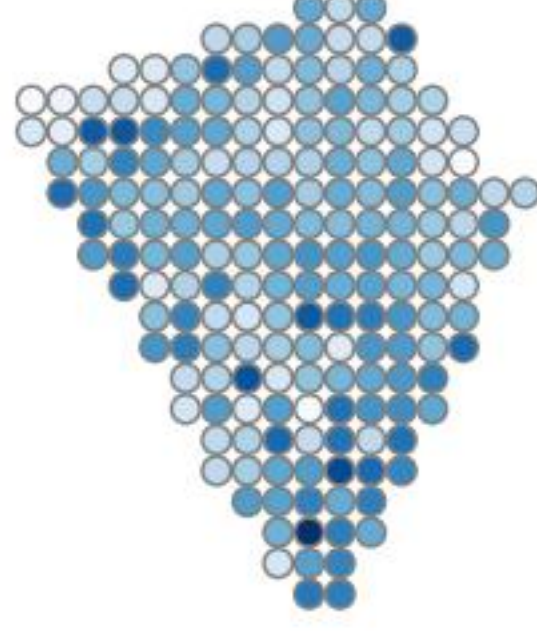

Endothelial Lymphatic  
LYVE1

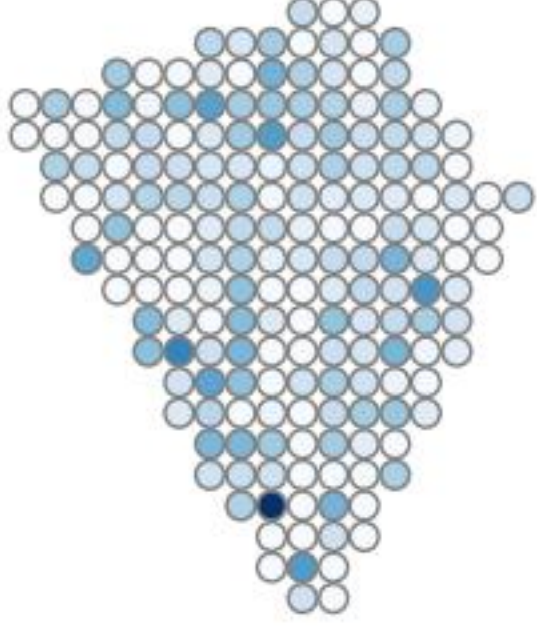

Endothelial RGS5

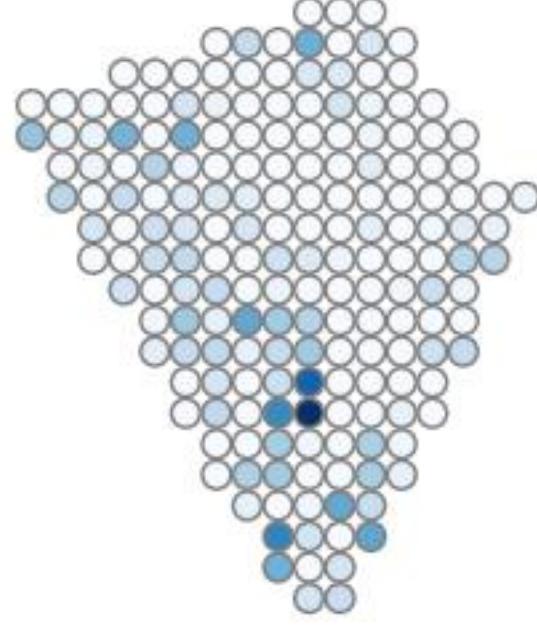

Endothelial CXCL12

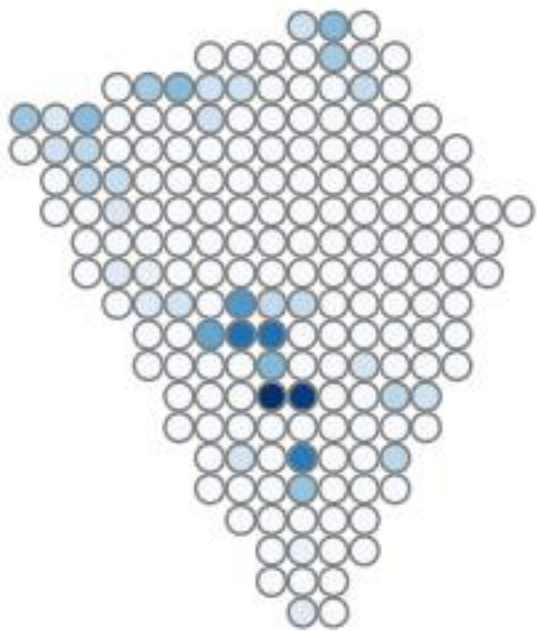

Endothelial ACKR1

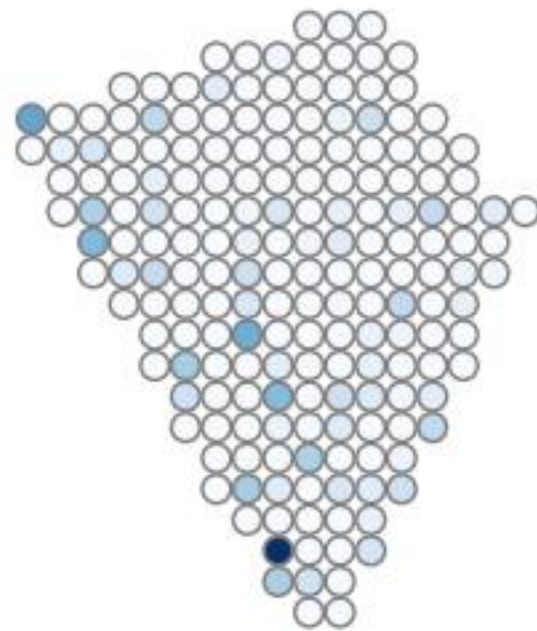

Cancer Epithelial

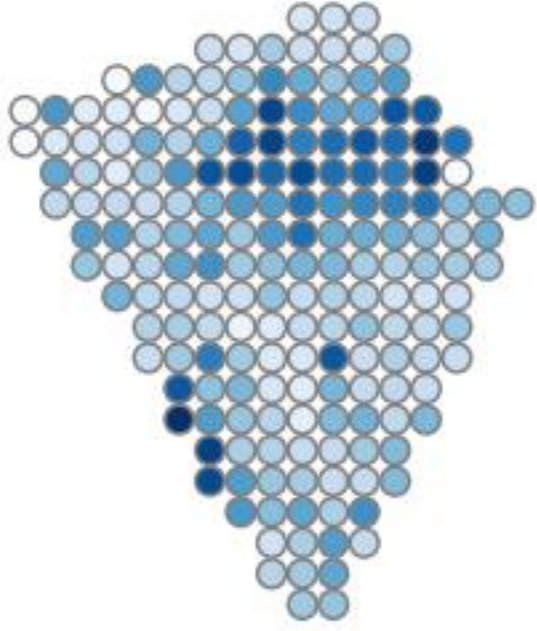

Normal Epithelial

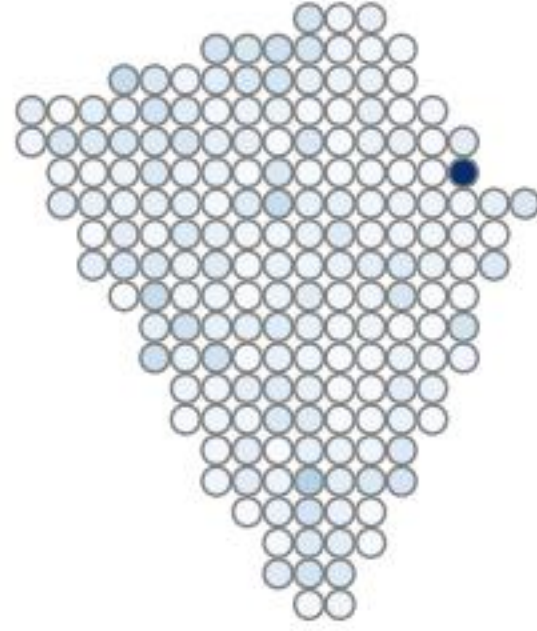

Cycling Myeloid

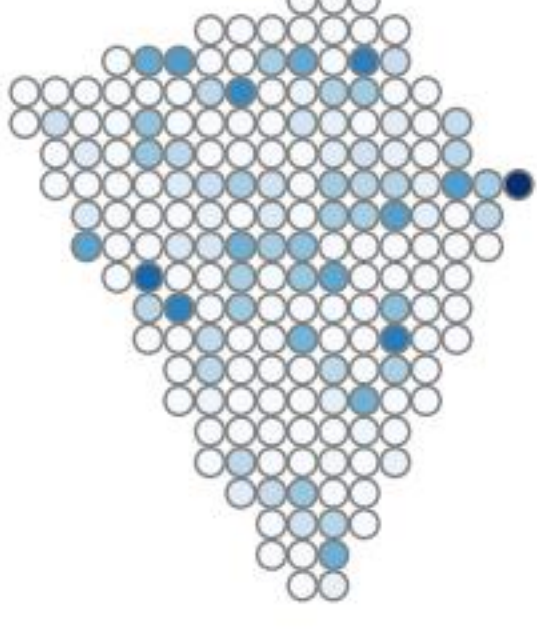

DCs

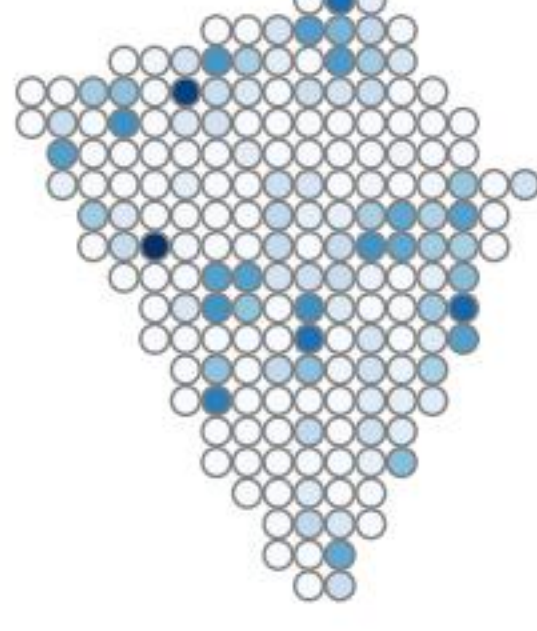

Macrophages

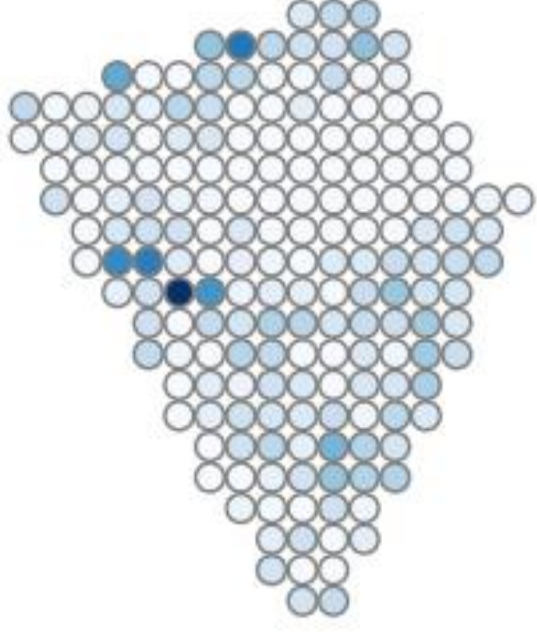

Monocytes

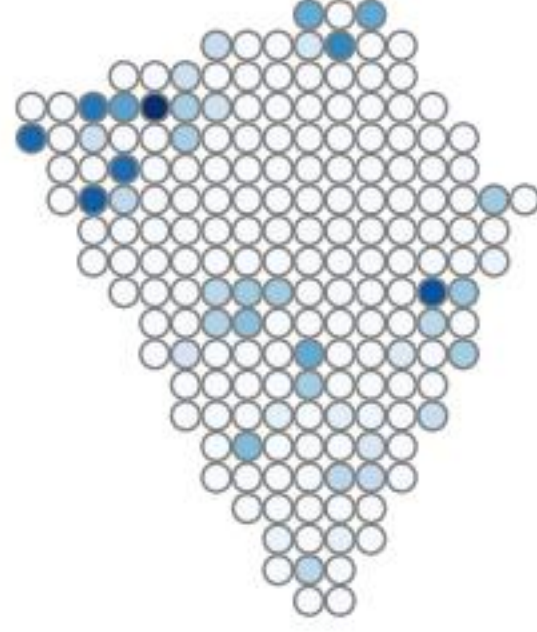

Plasma Cells

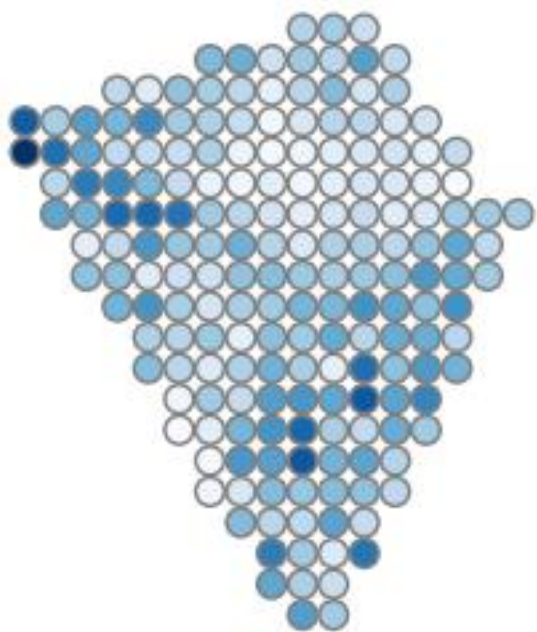

PVL Differentiated

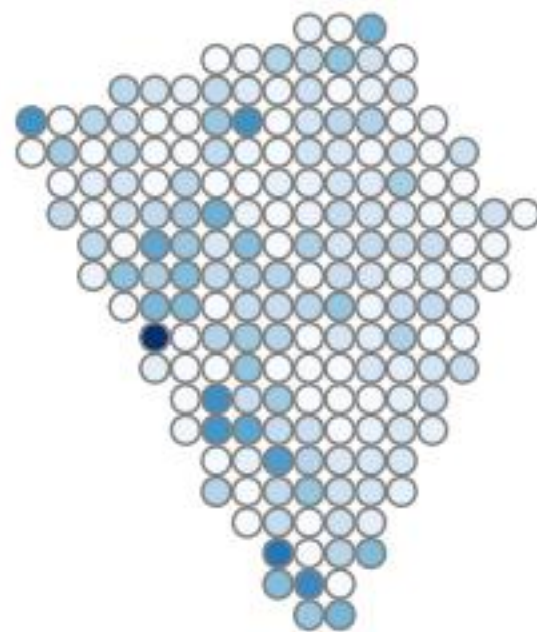

PVL Immature

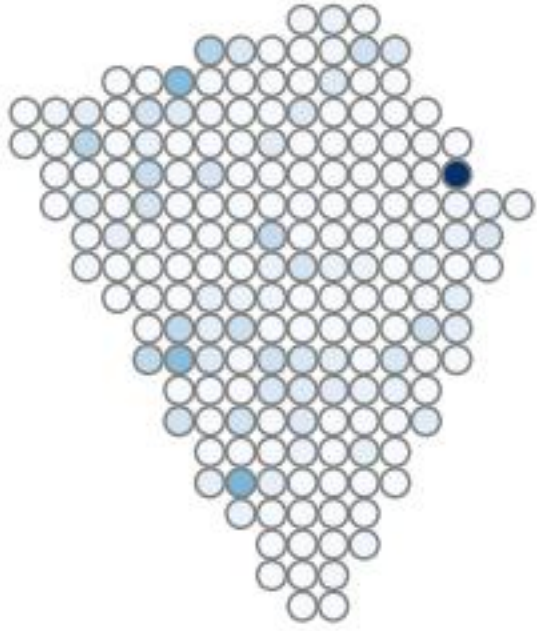

CD4+ T-cells

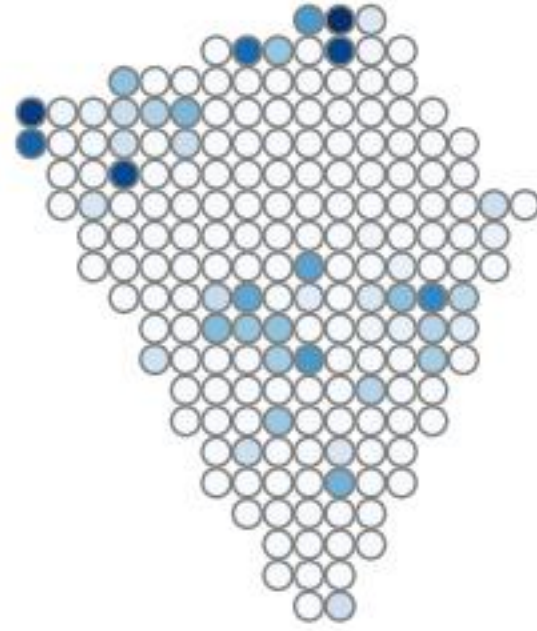

CD8+ T-cells

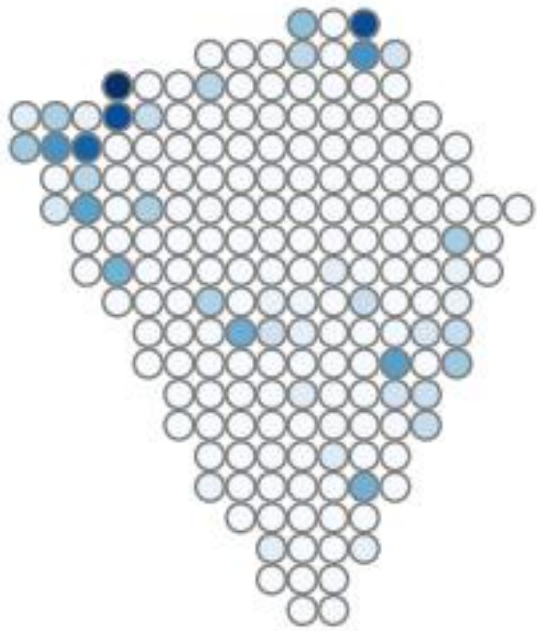

Cycling T-cells

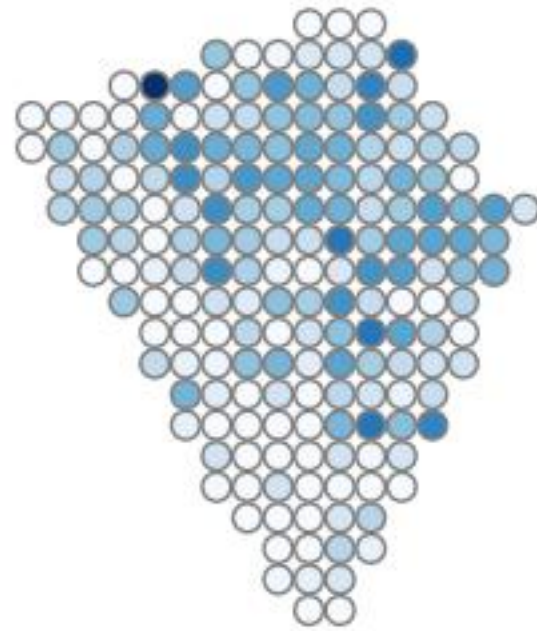

NK cells

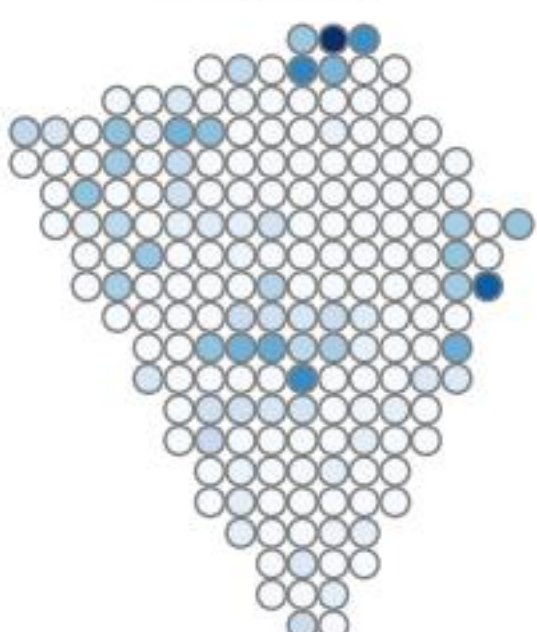

NKT cells

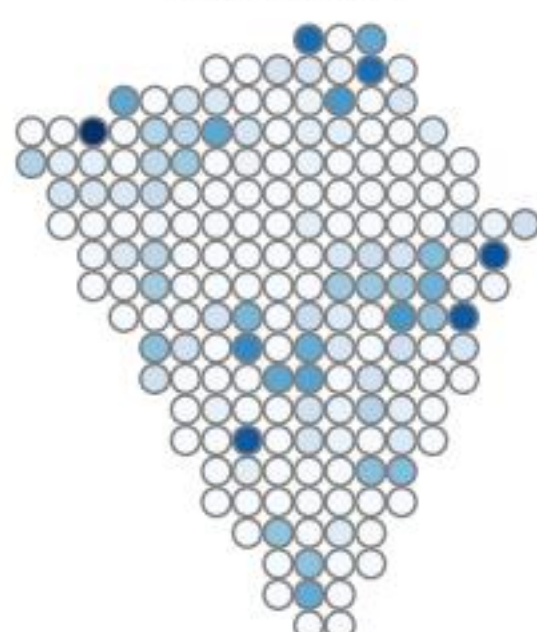



# minor\_C5

B-cells Memory

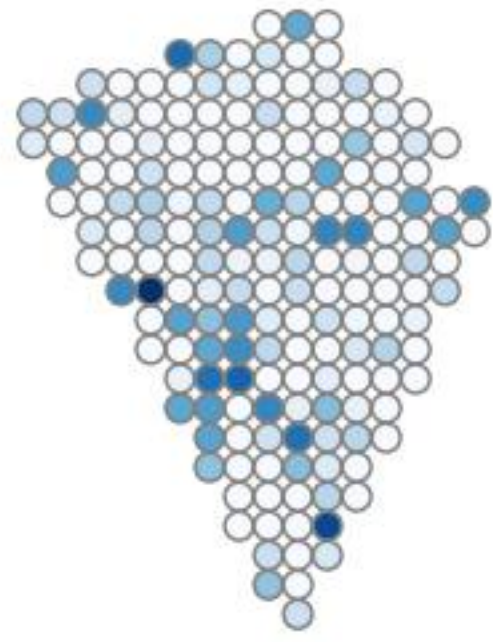

B-cells Naive

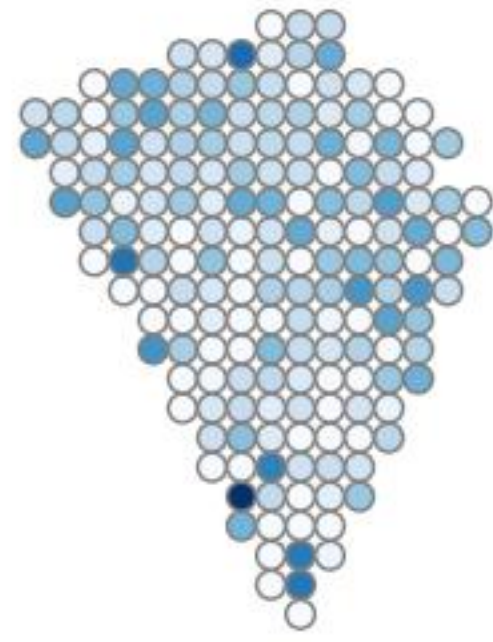

CAFs MSC/iCAF-like

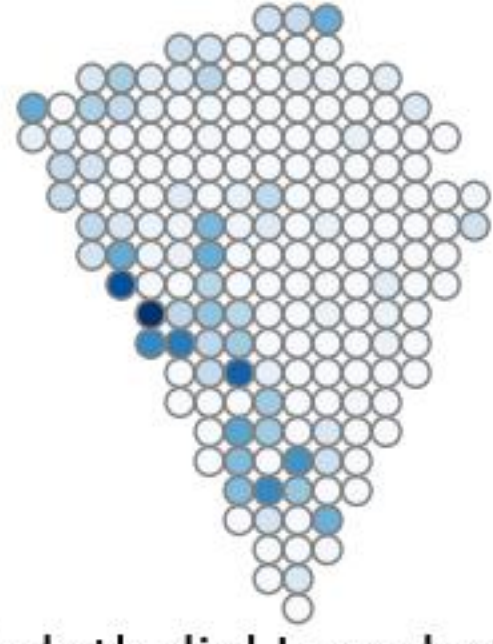

CAFs myCAF-like

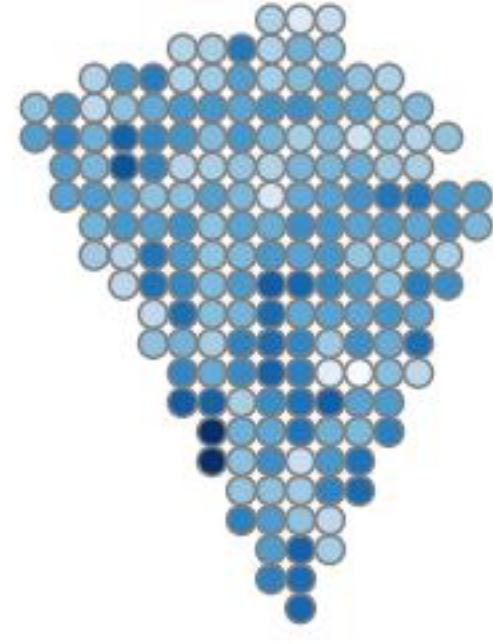

Endothelial Lymphatic  
LYVE1

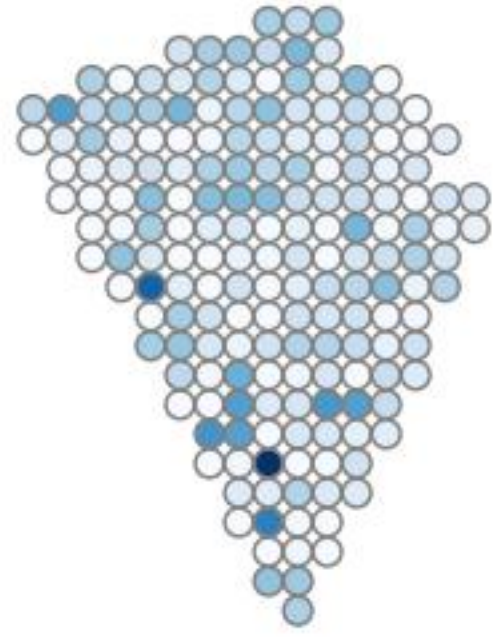

Endothelial RGS5

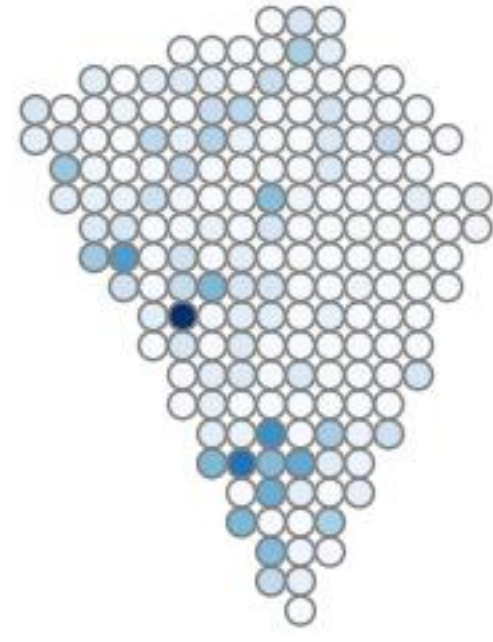

Endothelial CXCL12

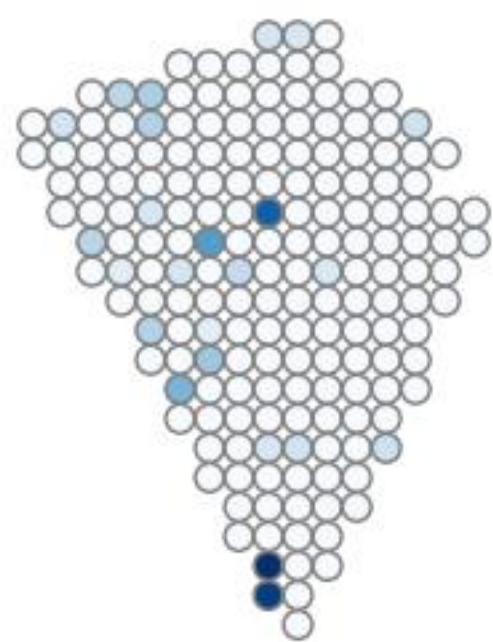

Endothelial ACKR1

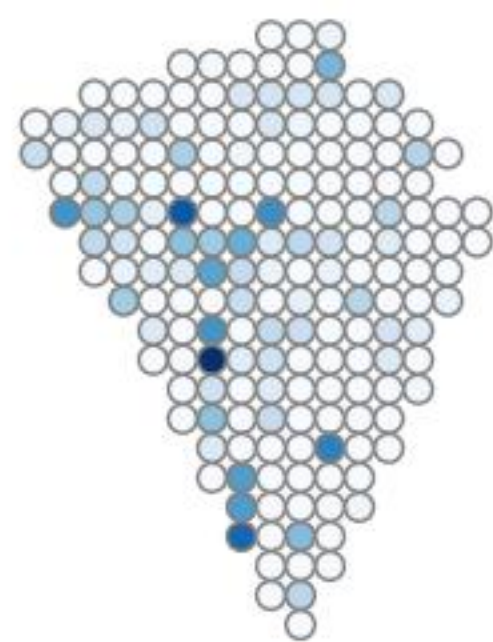

Cancer Epithelial

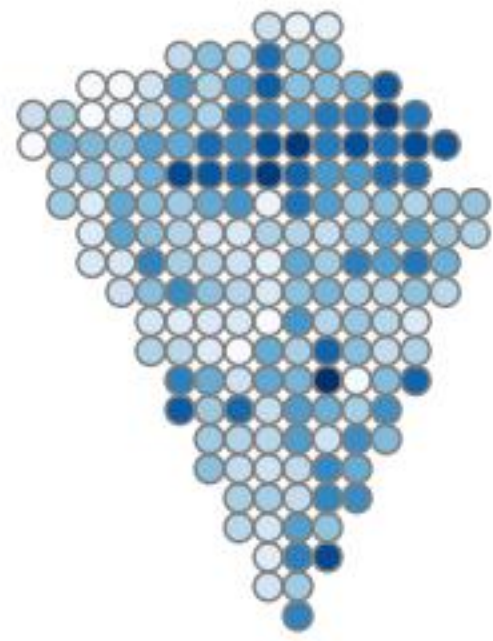

Normal Epithelial

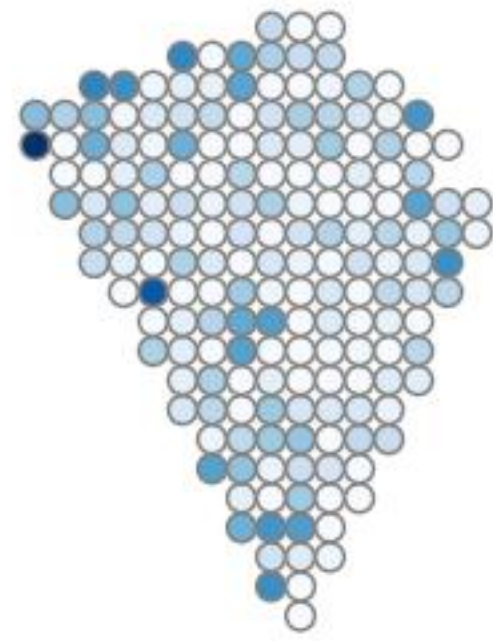

Cycling Myeloid

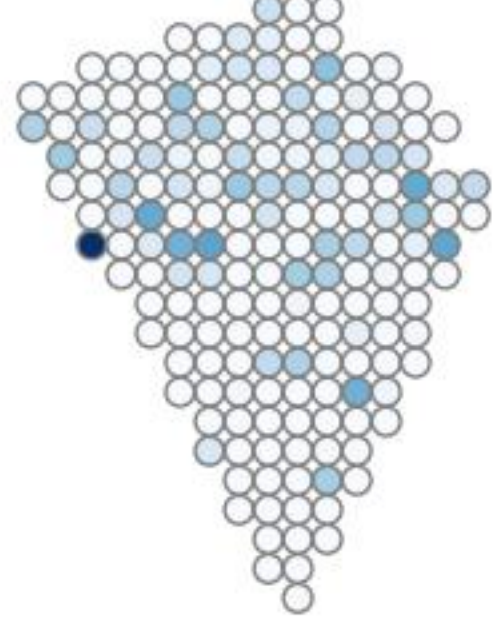

DCs

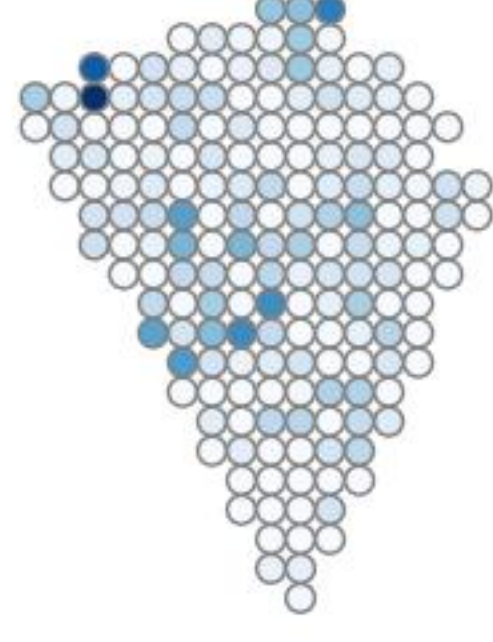

Macrophages

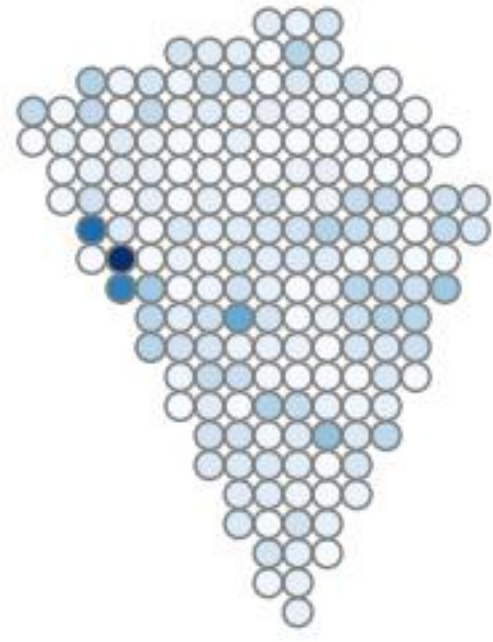

Monocytes

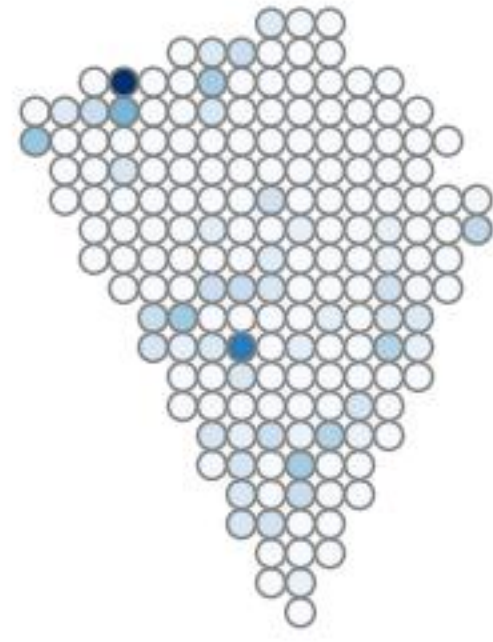

Plasma Cells

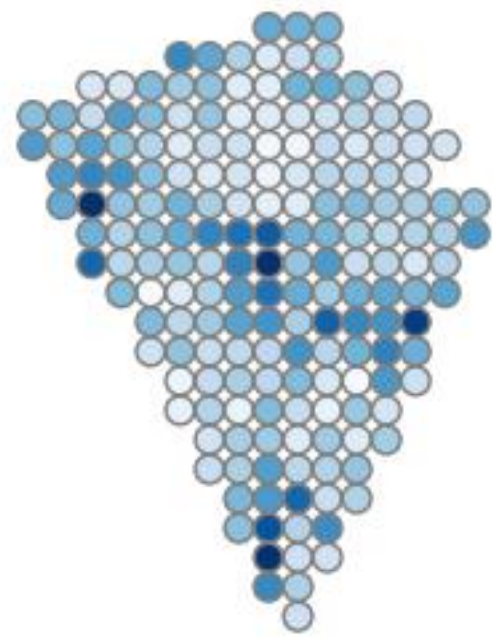

PVL Differentiated

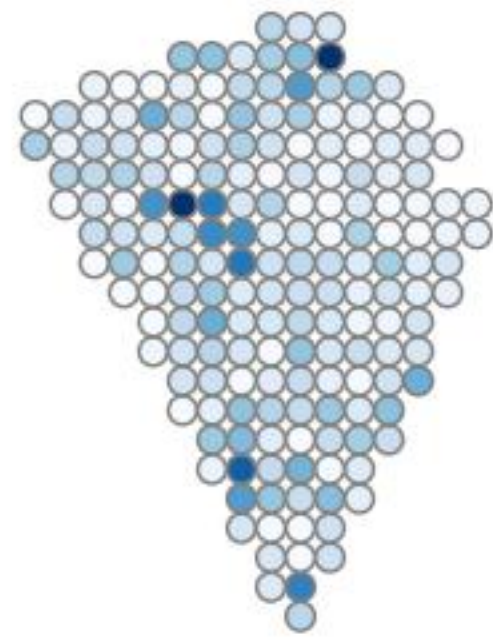

PVL Immature

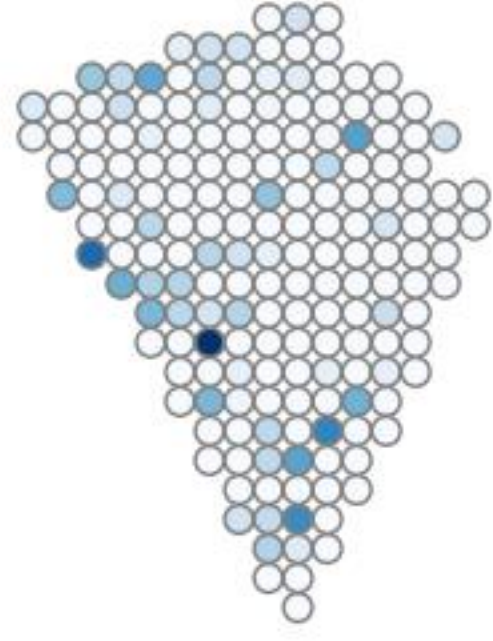

CD4+ T-cells

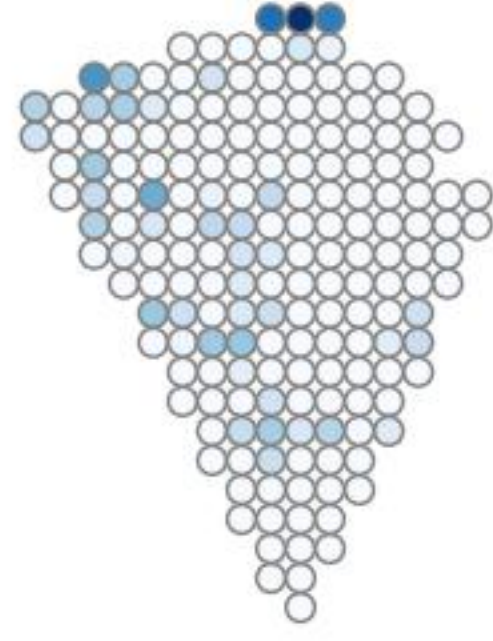

CD8+ T-cells

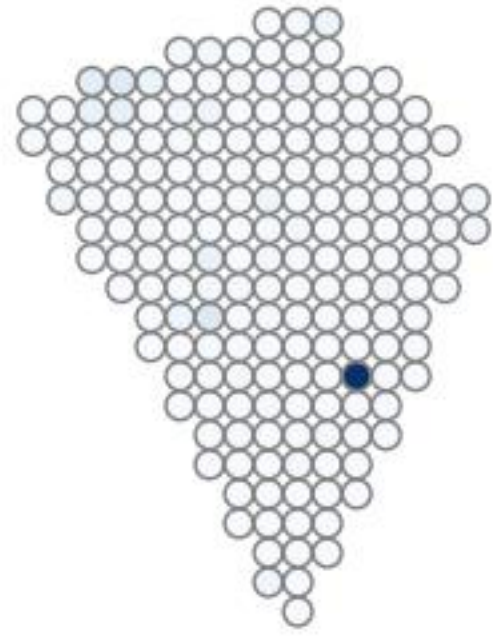

Cycling T-cells

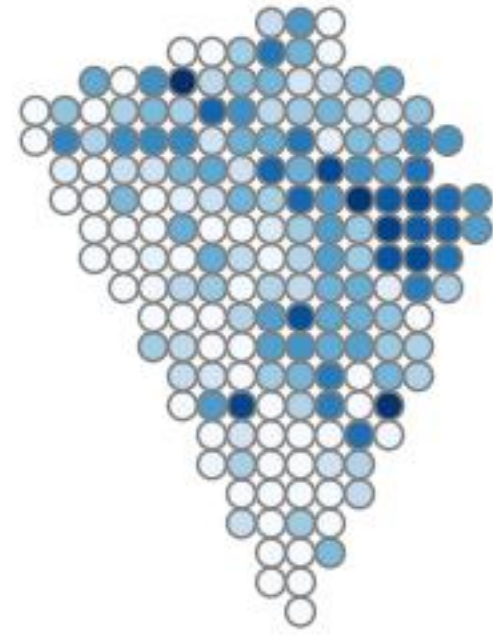

NK cells

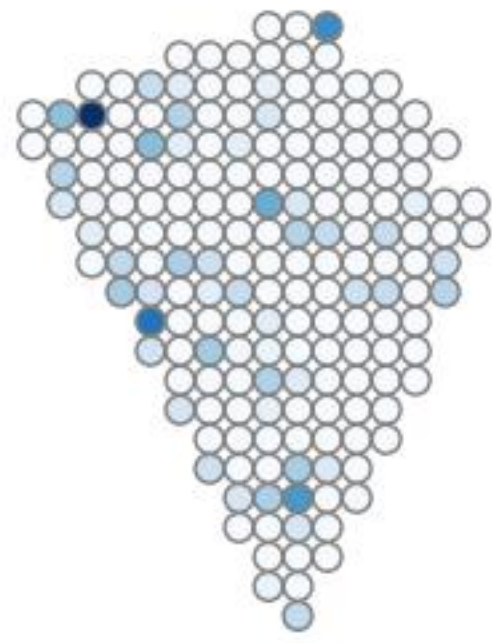

NKT cells

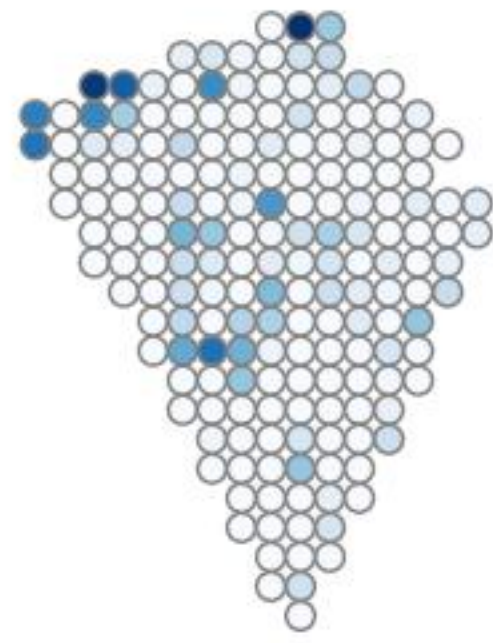

# minor\_E1

B-cells Memory

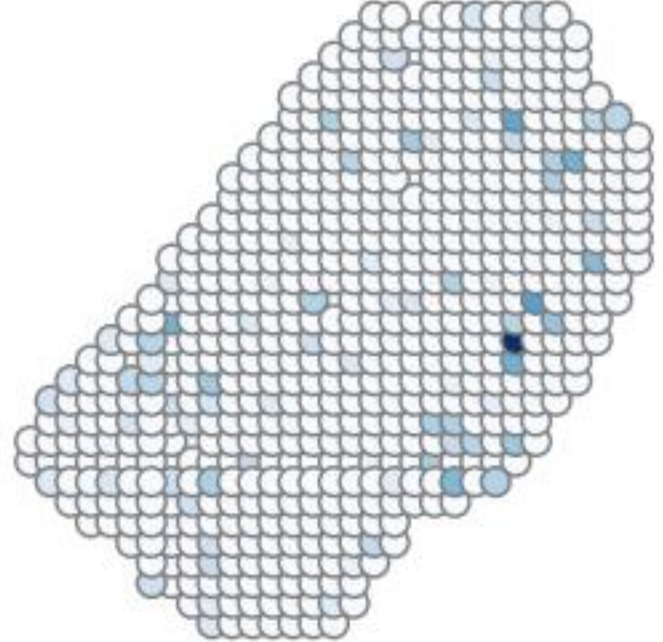

B-cells Naive

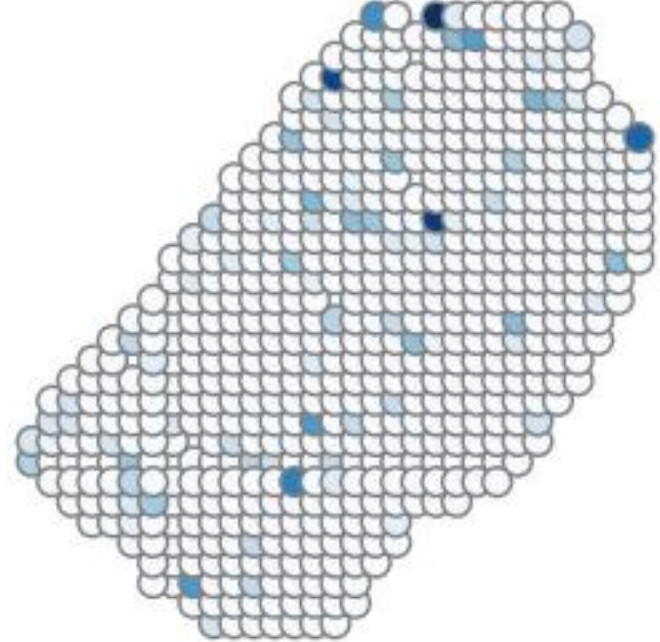

CAFs MSC/iCAF-like

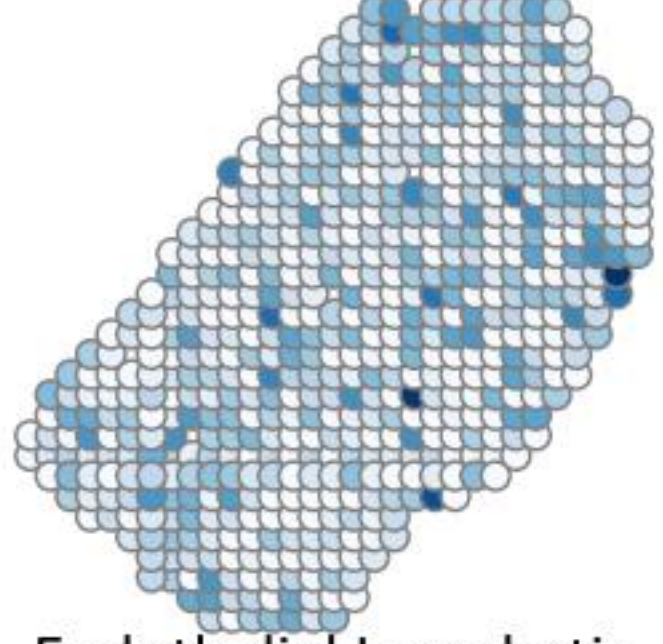

CAFs myCAF-like

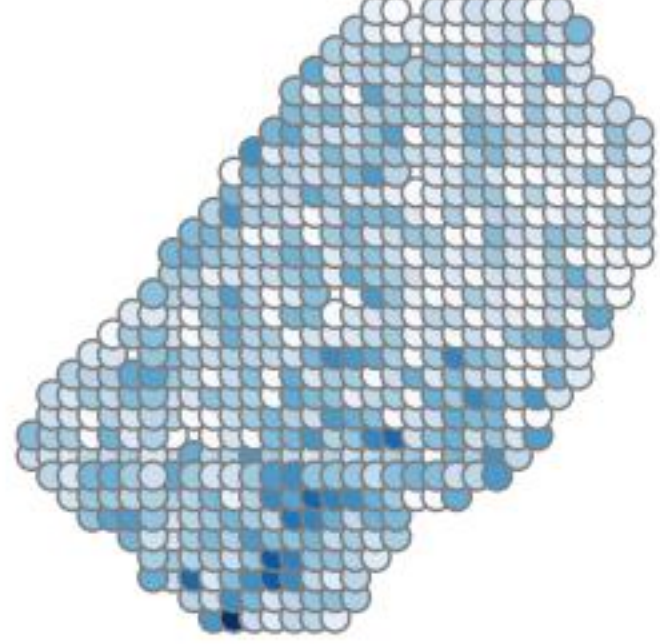

Endothelial Lymphatic  
LYVE1

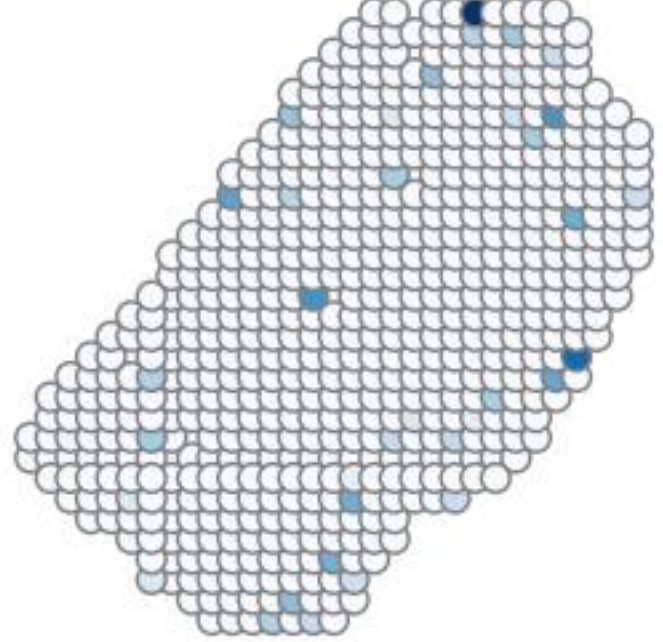

Endothelial RGS5

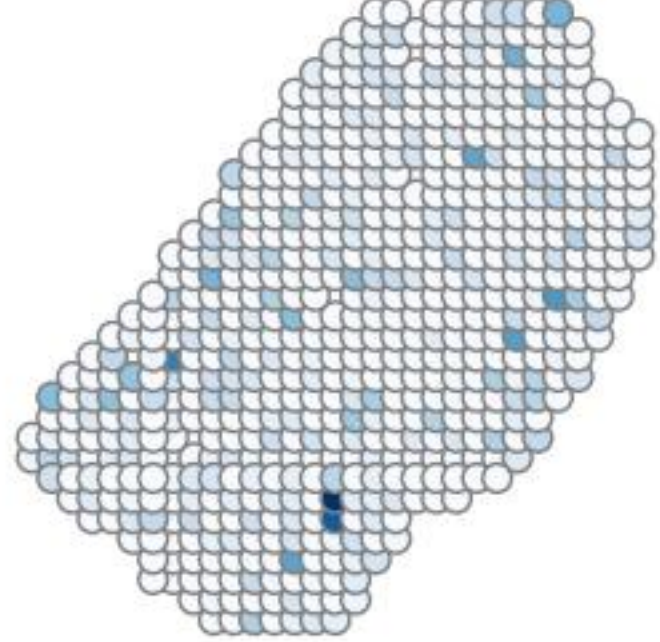

Endothelial CXCL12

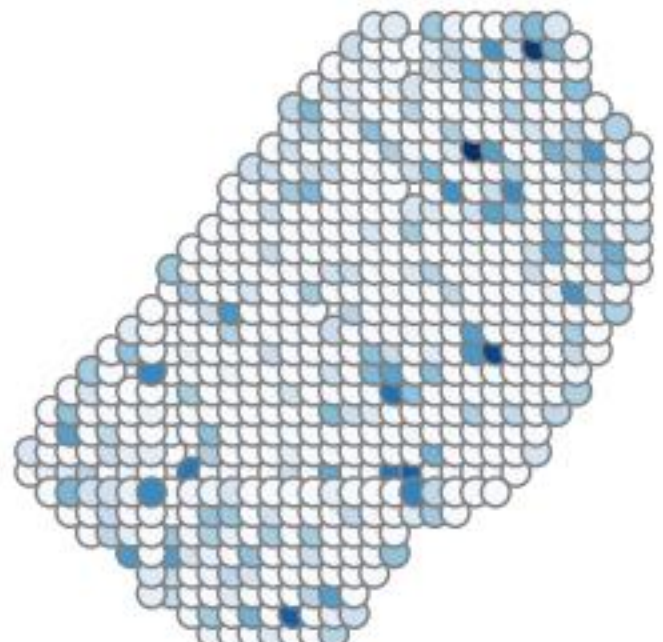

Endothelial ACKR1

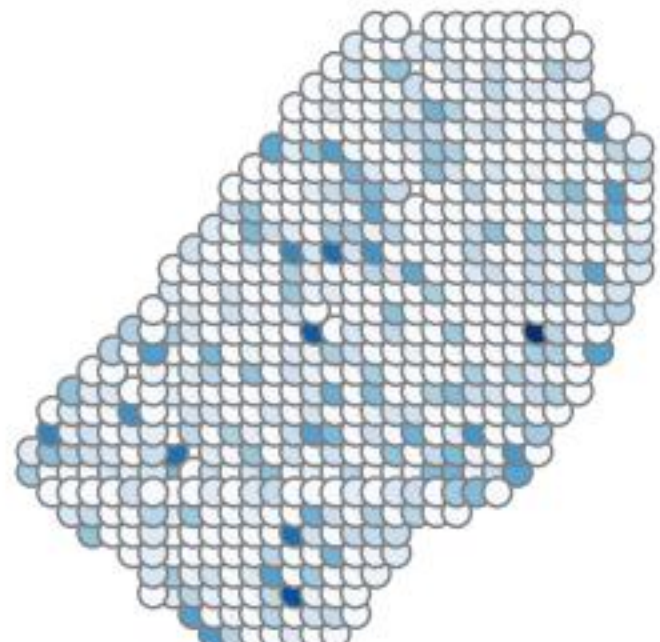

Cancer Epithelial

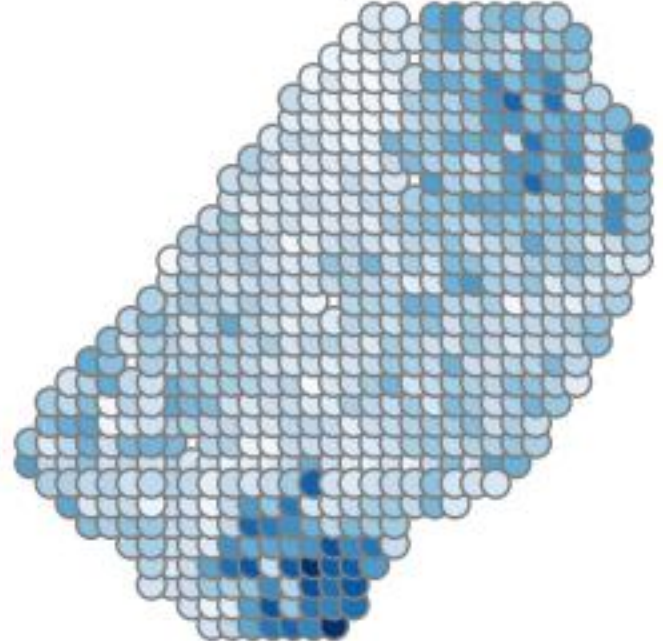

Normal Epithelial

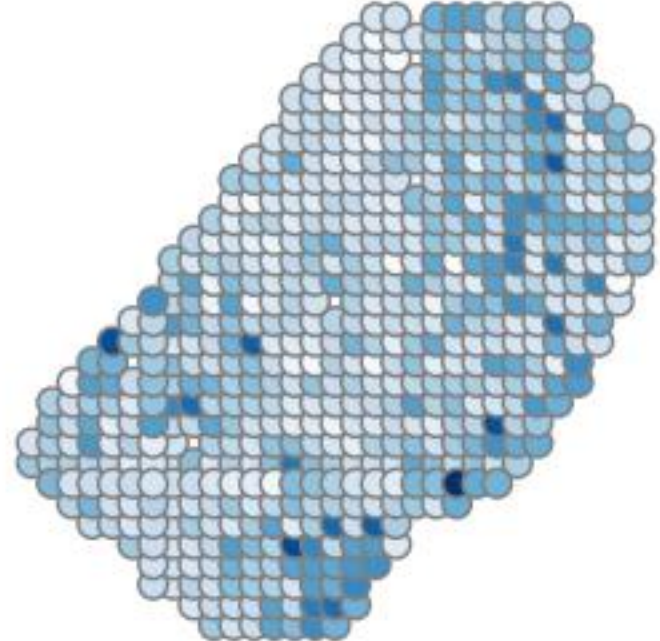

Cycling Myeloid

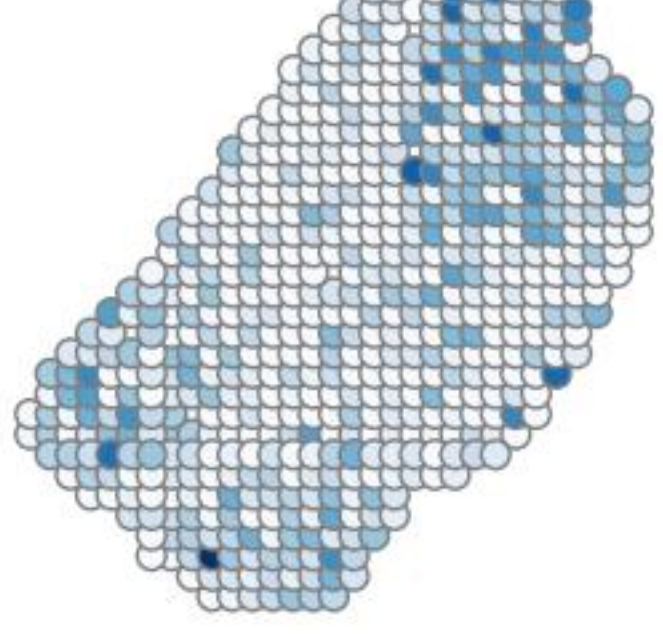

DCs

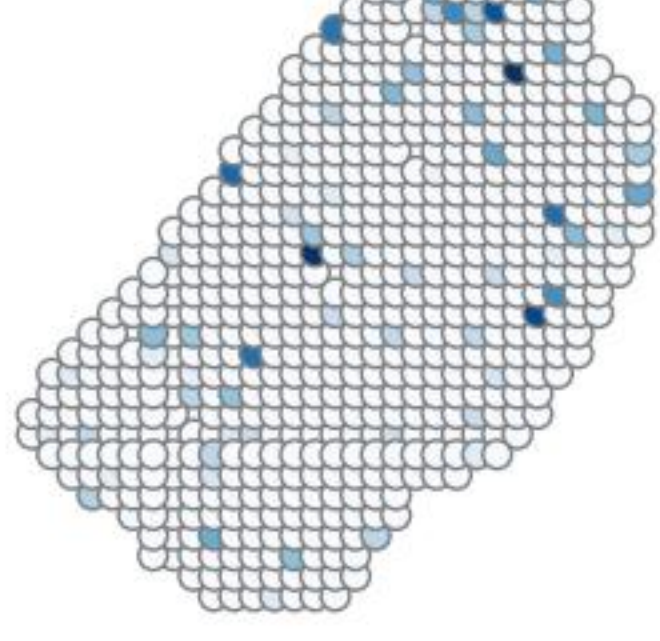

Macrophages

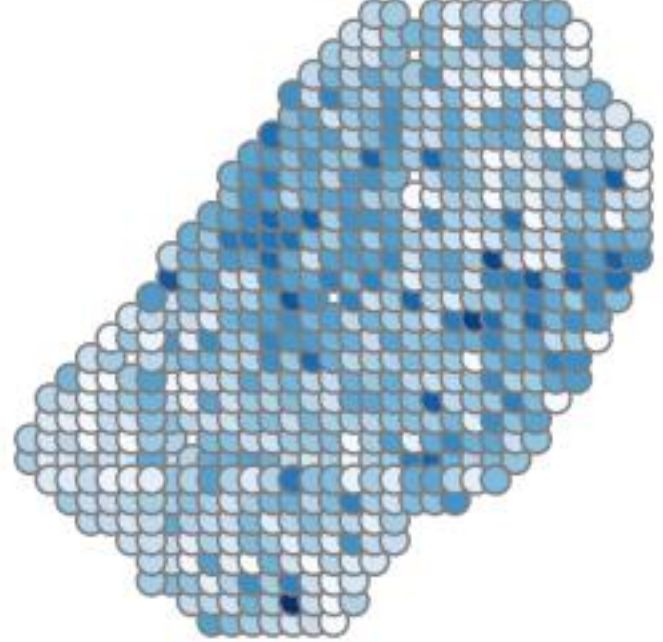

Monocytes

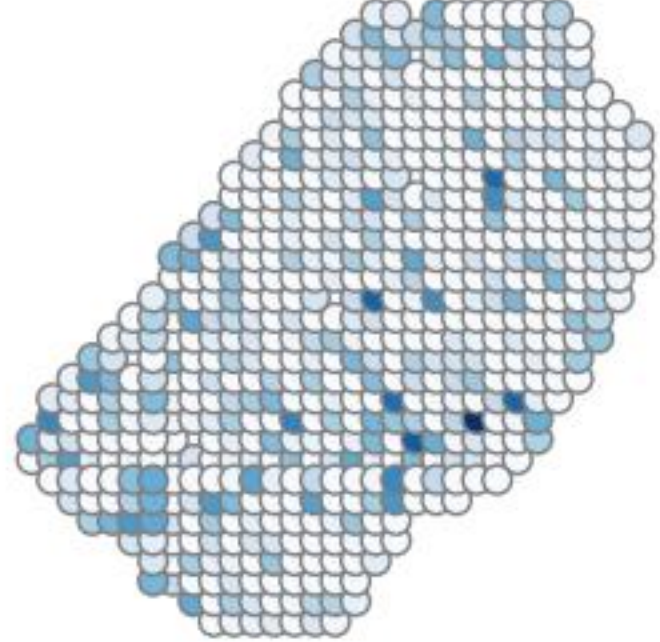

Plasma Cells

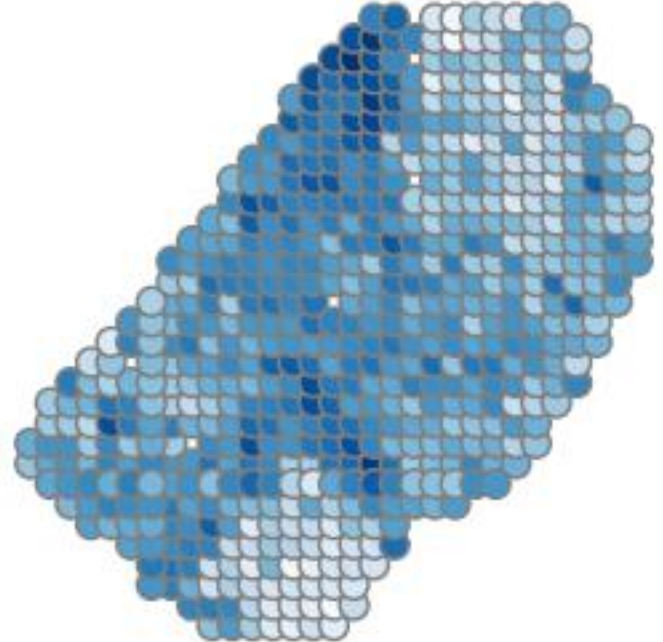

PVL Differentiated

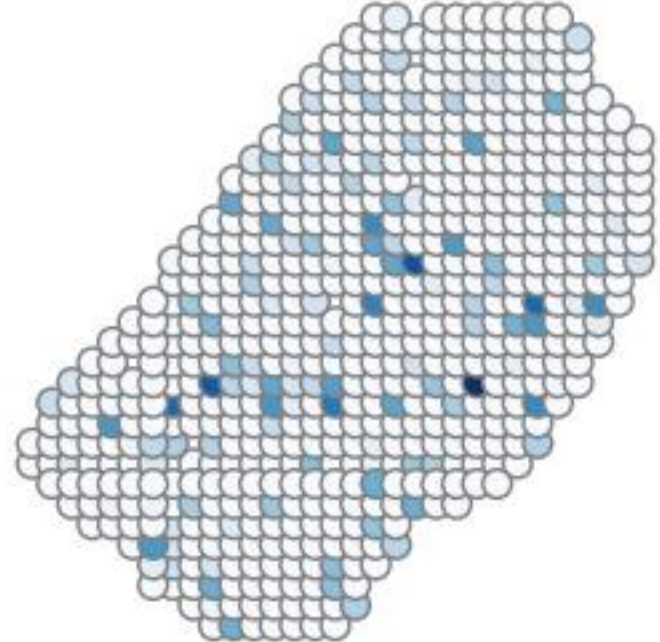

PVL Immature

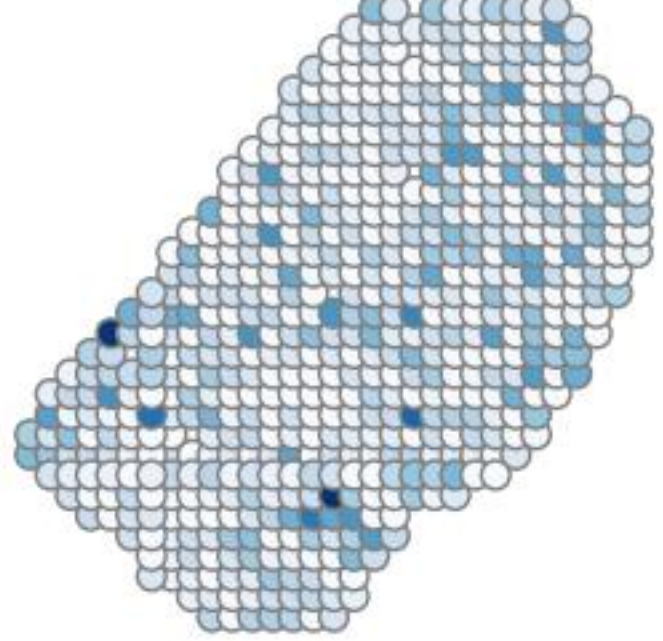

CD4+ T-cells

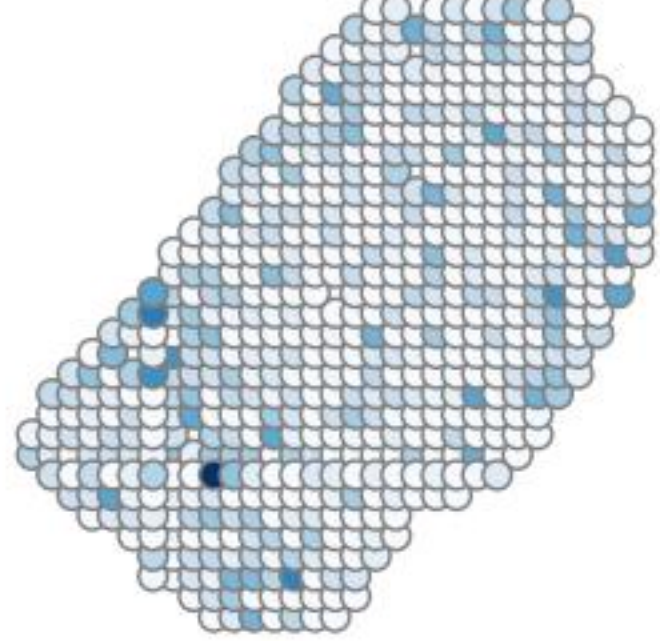

CD8+ T-cells

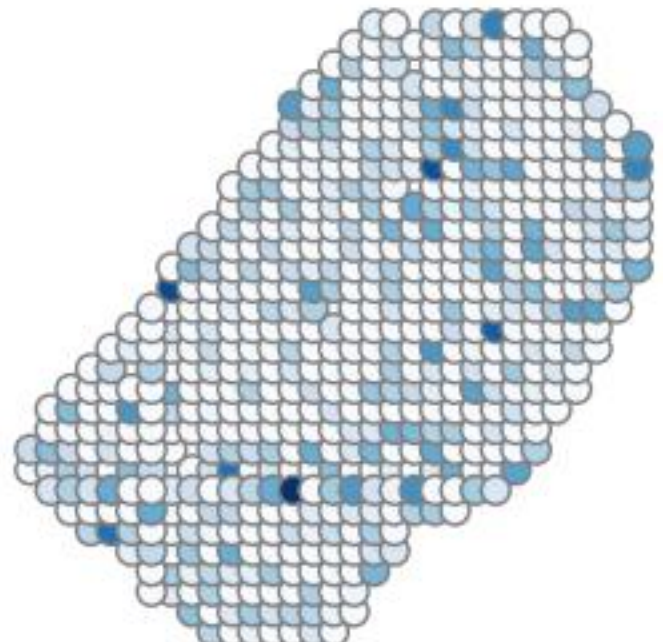

Cycling T-cells

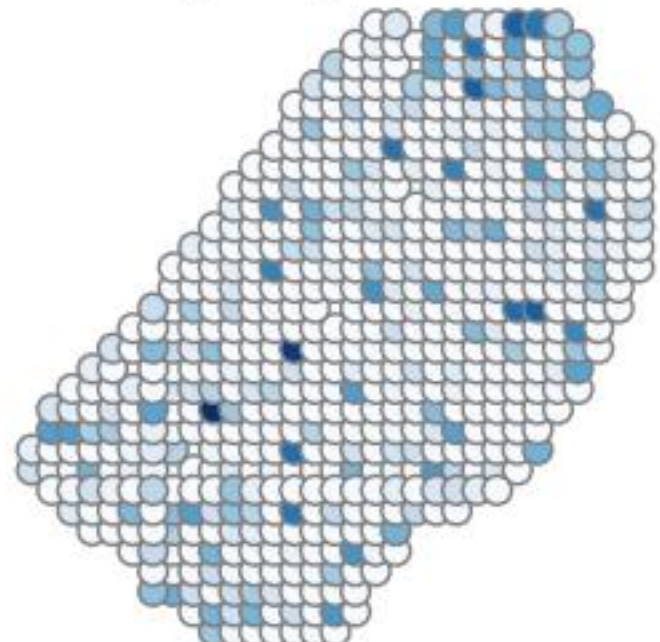

NK cells

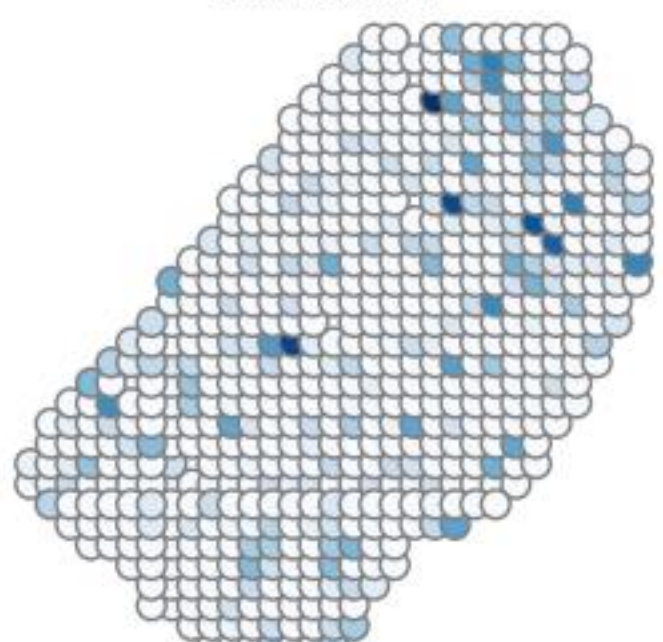

NKT cells

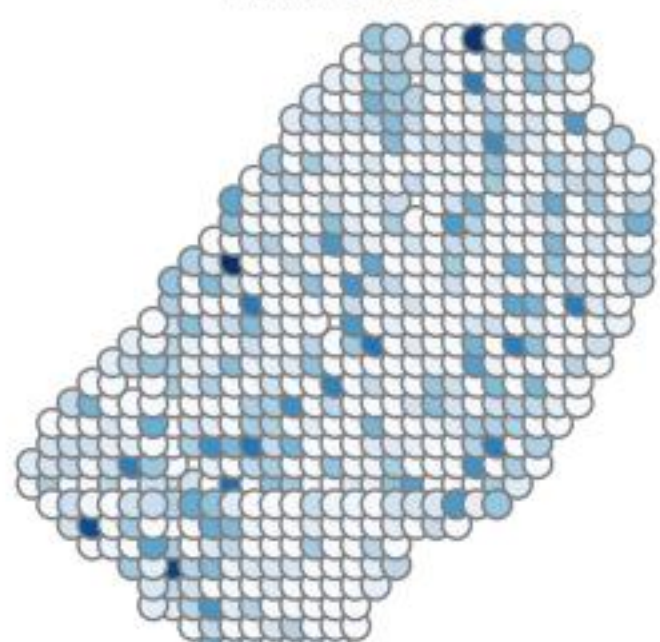

# minor\_B4

B-cells Memory

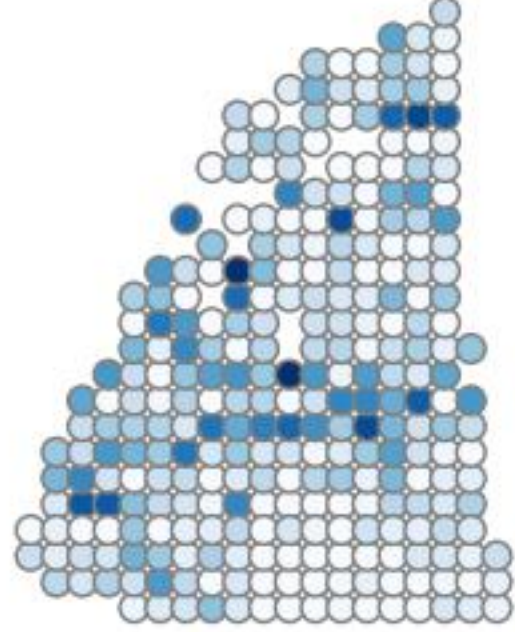

B-cells Naive

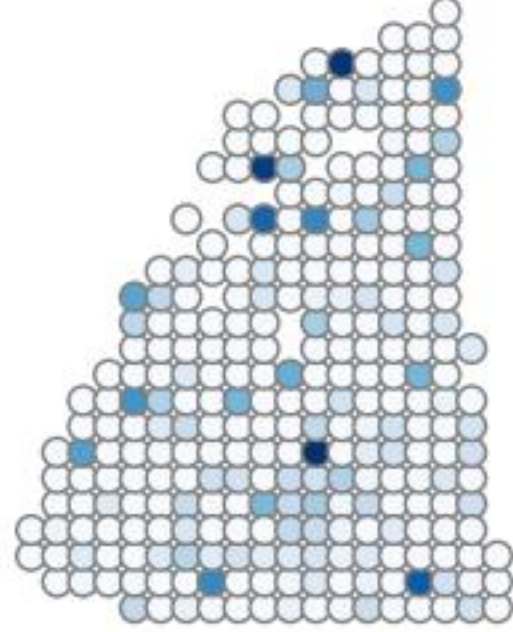

CAFs MSC/iCAF-like

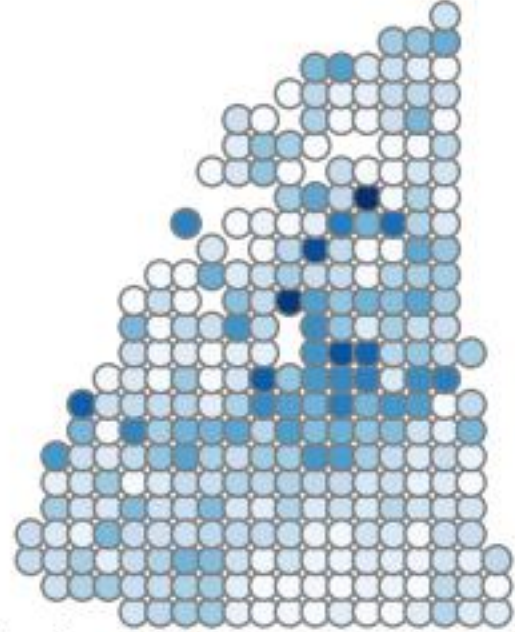

CAFs myCAF-like

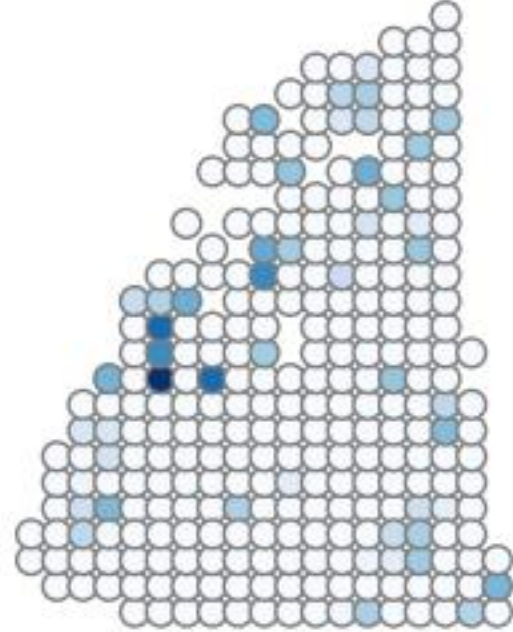

Endothelial Lymphatic  
LYVE1

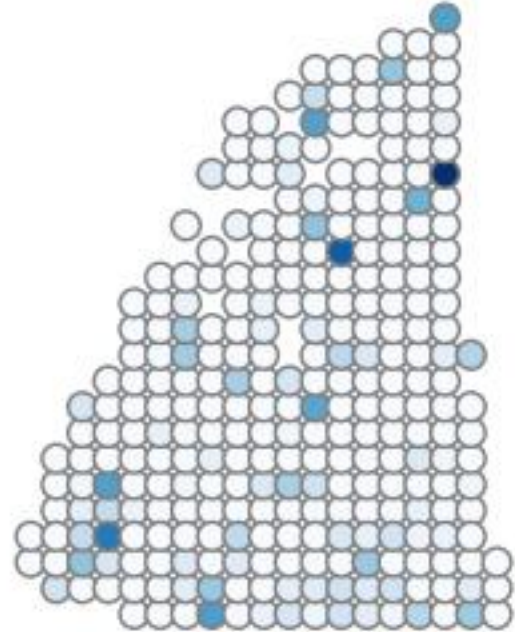

Endothelial RGS5

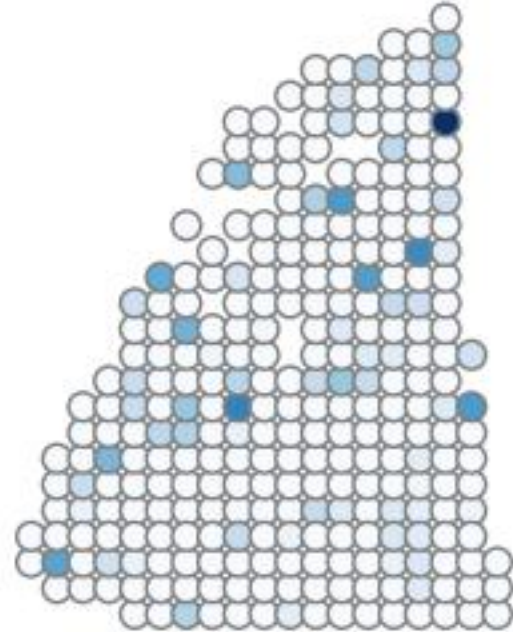

Endothelial CXCL12

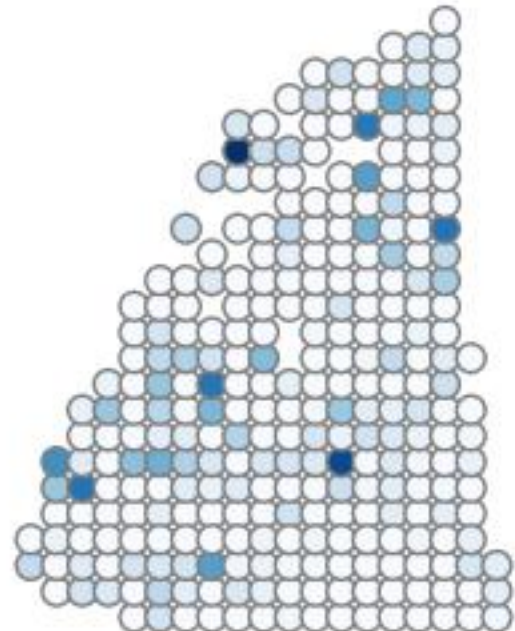

Endothelial ACKR1

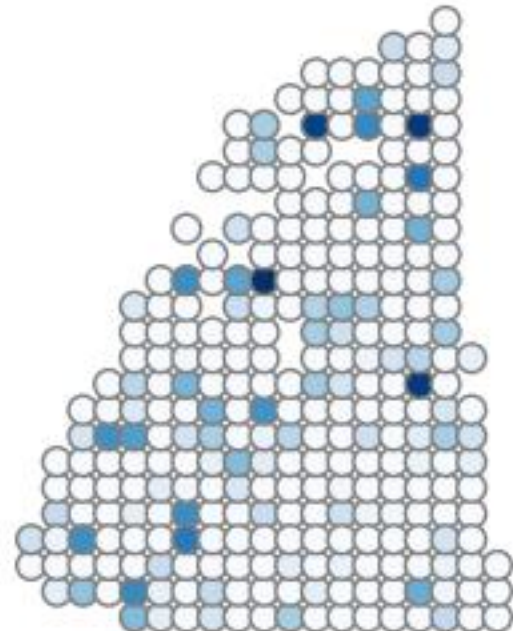

Cancer Epithelial

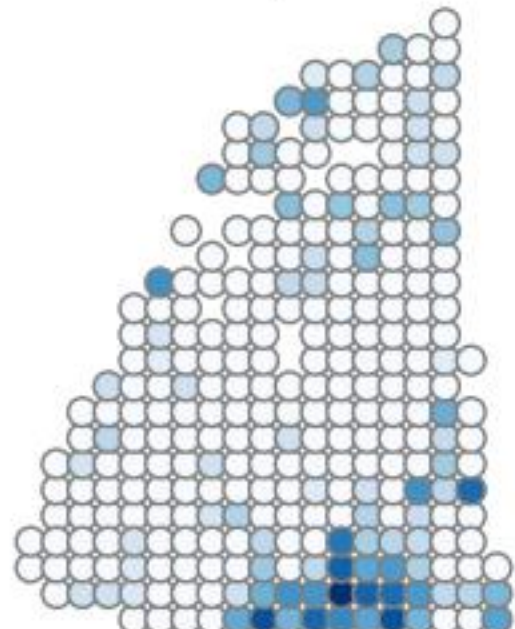

Normal Epithelial

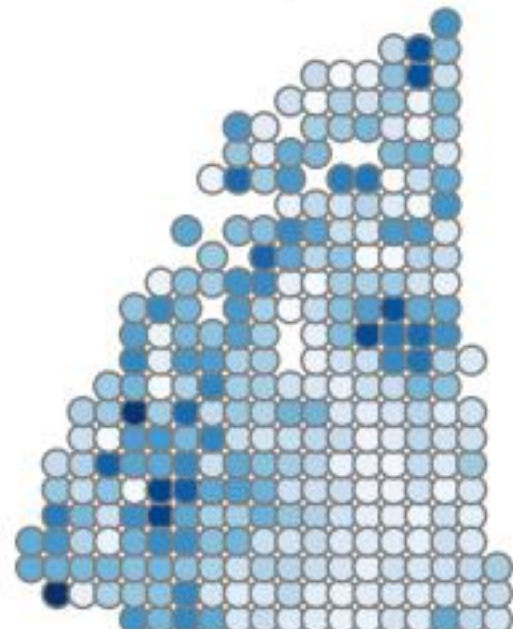

Cycling Myeloid

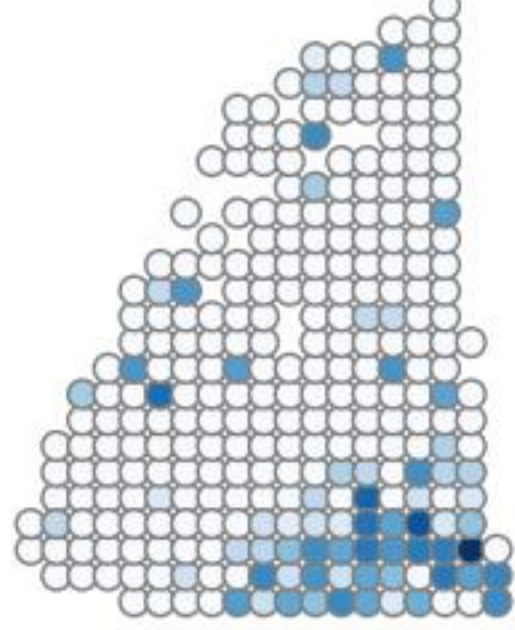

DCs

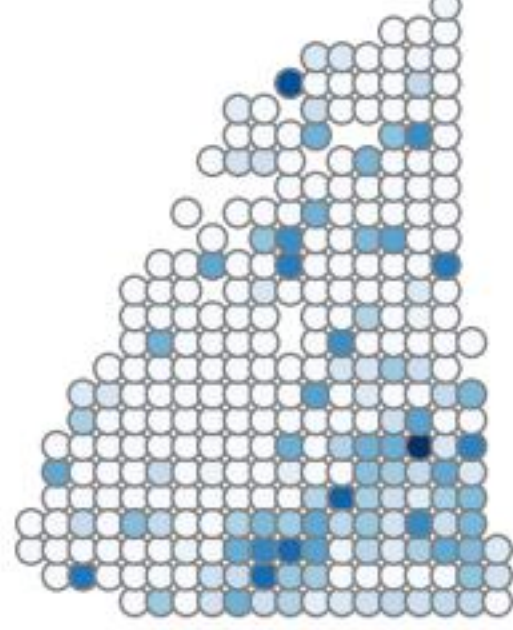

Macrophages

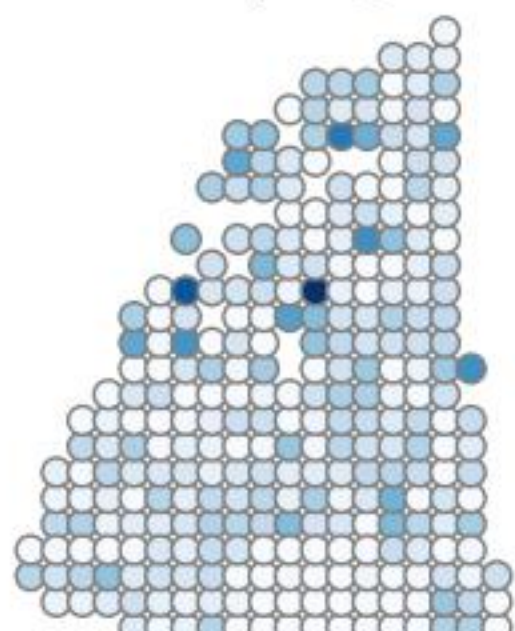

Monocytes

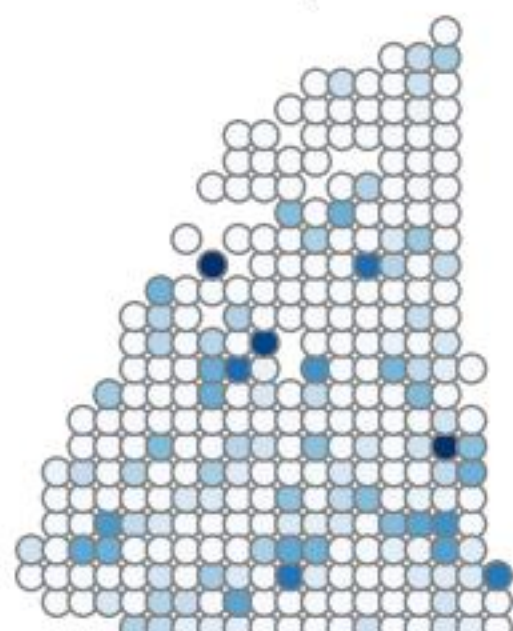

Plasma Cells

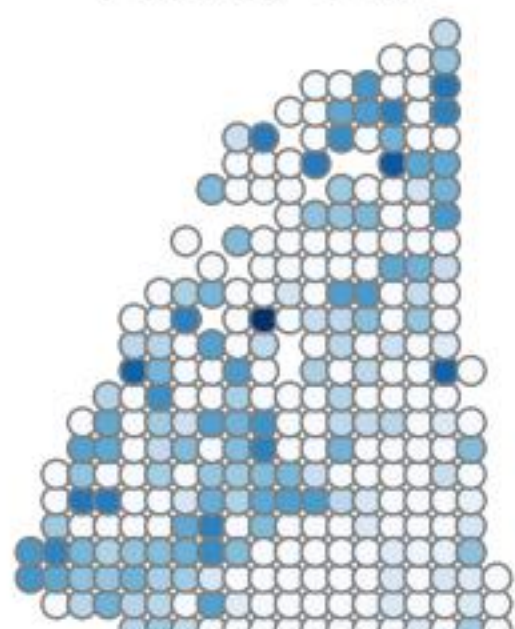

PVL Differentiated

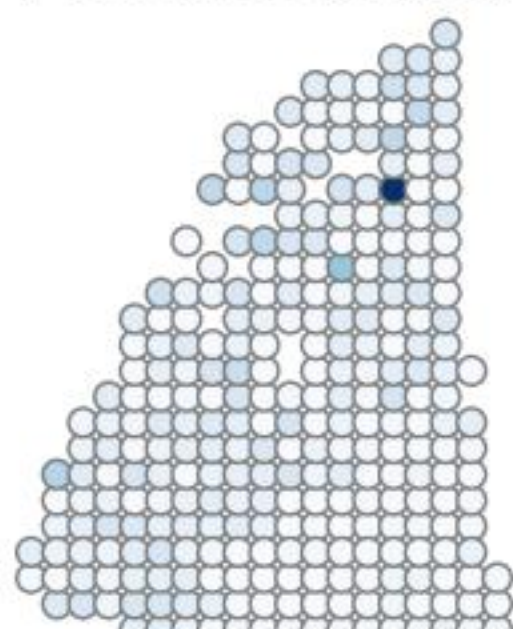

PVL Immature

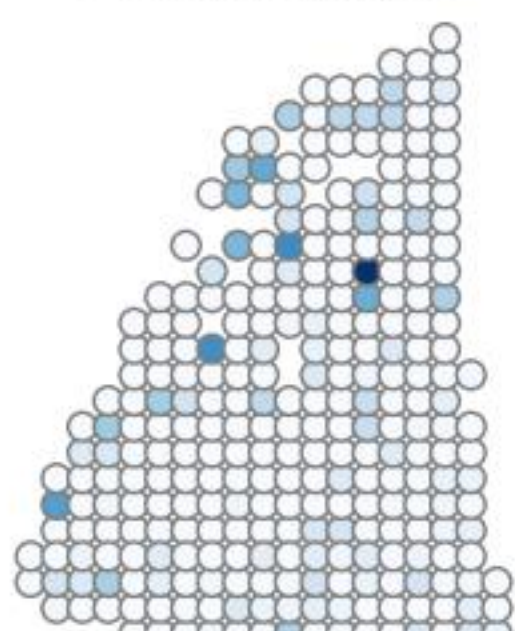

CD4+ T-cells

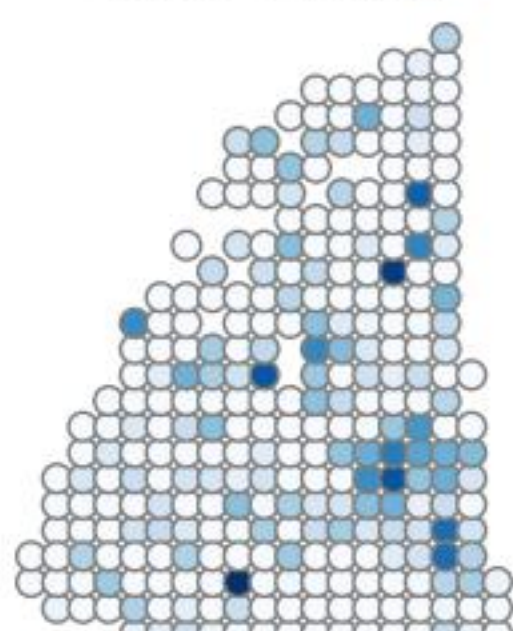

CD8+ T-cells

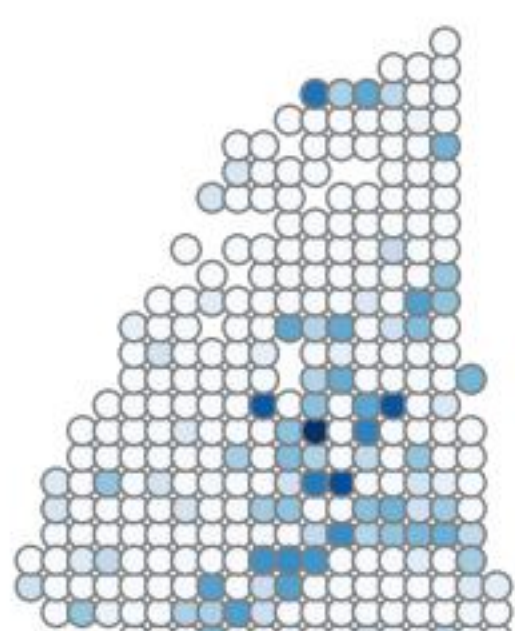

Cycling T-cells

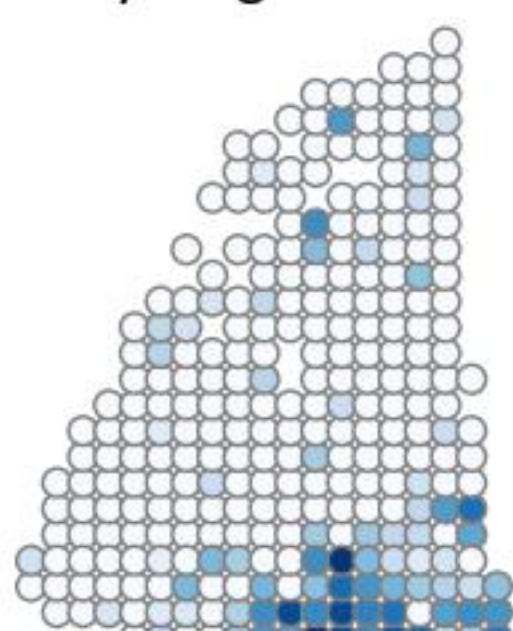

NK cells

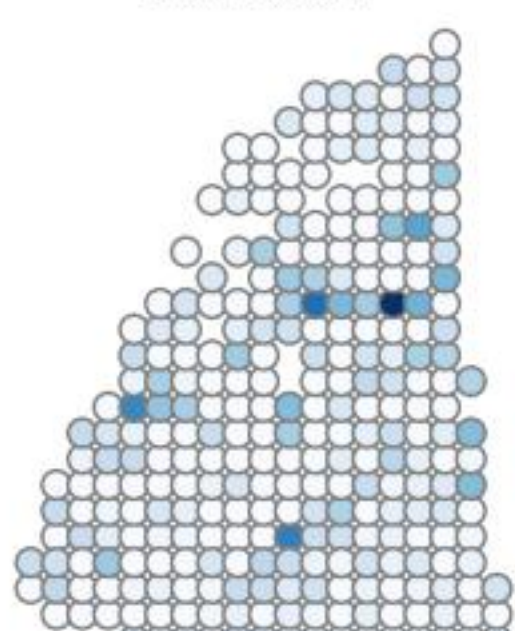

NKT cells

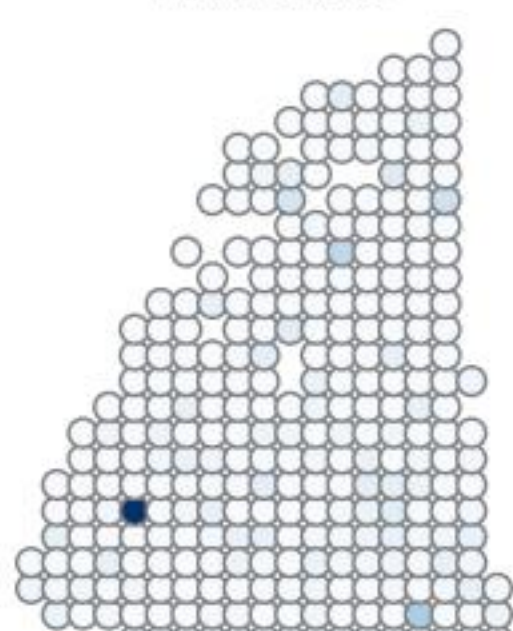

# minor\_A2

B-cells Memory

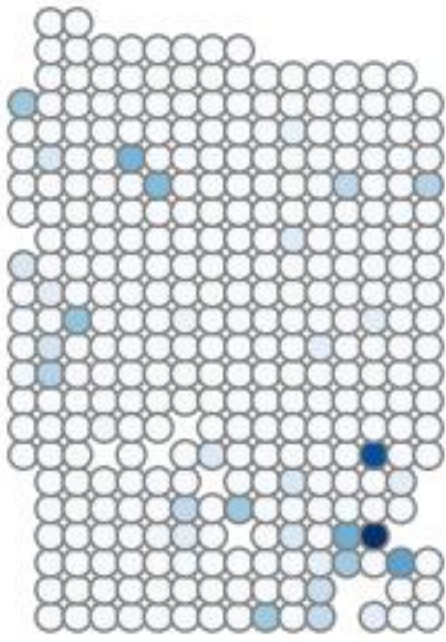

B-cells Naive

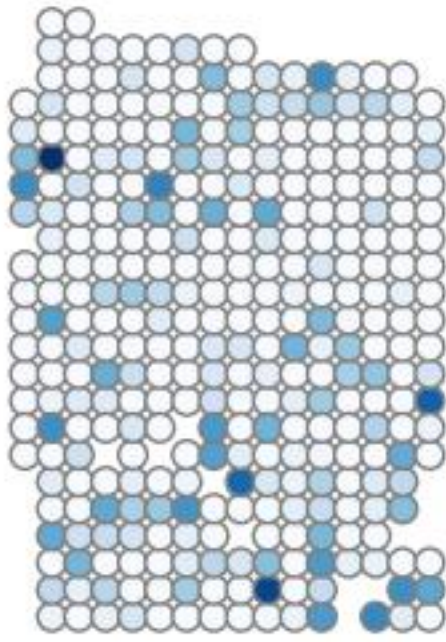

CAFs MSC/iCAF-like

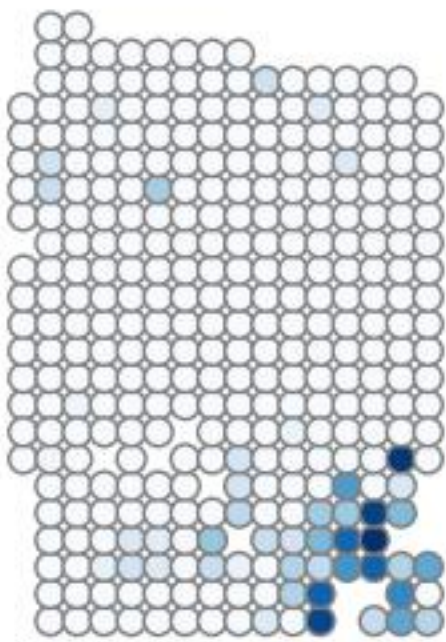

CAFs myCAF-like

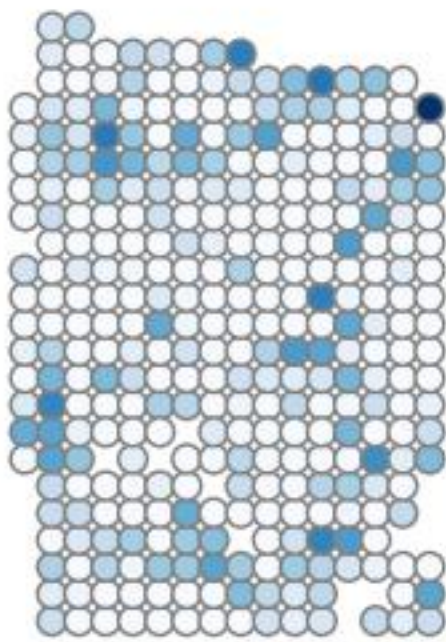

Endothelial Lymphatic  
LYVE1

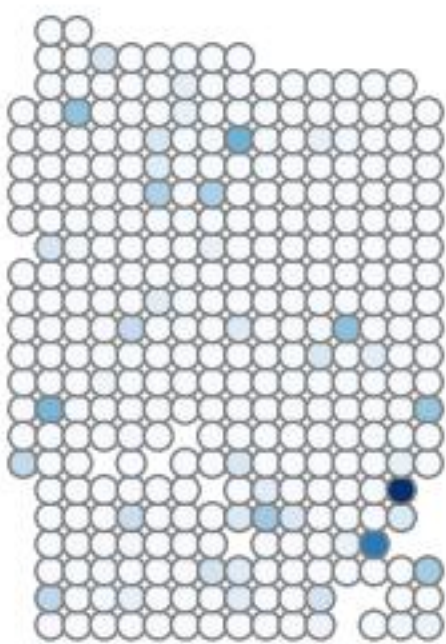

Endothelial RGS5

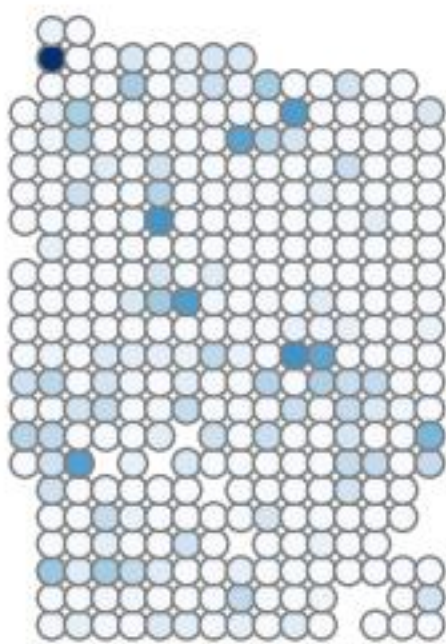

Endothelial CXCL12

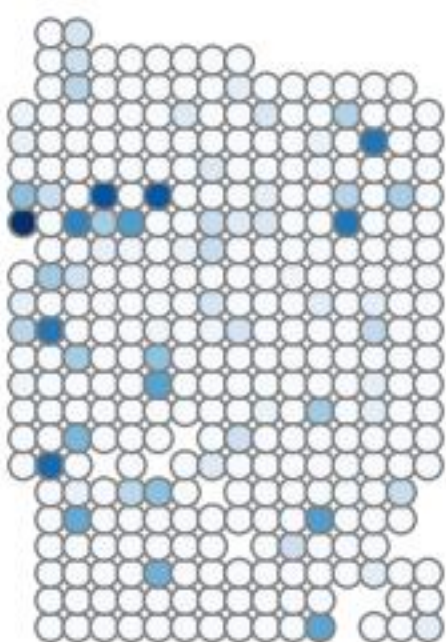

Endothelial ACKR1

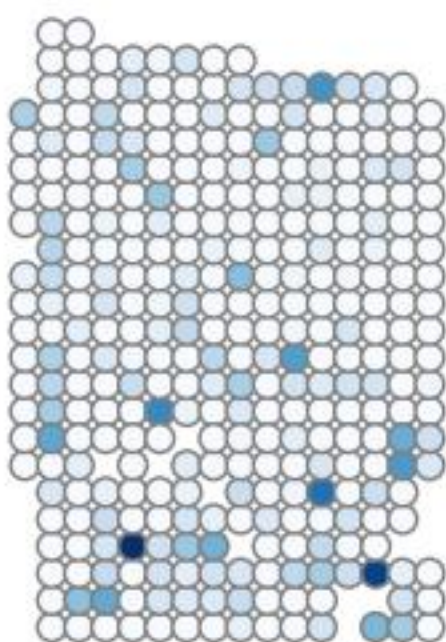

Cancer Epithelial

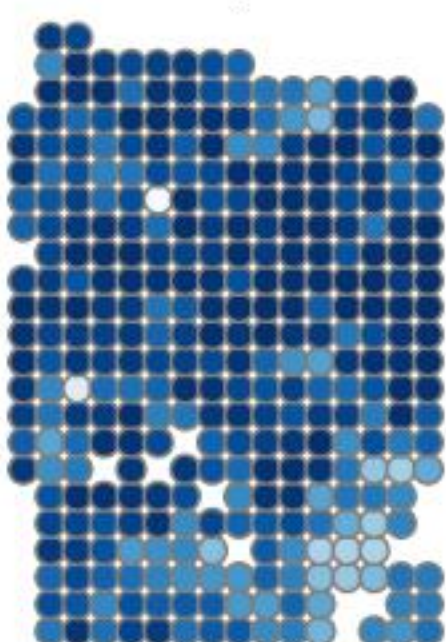

Normal Epithelial

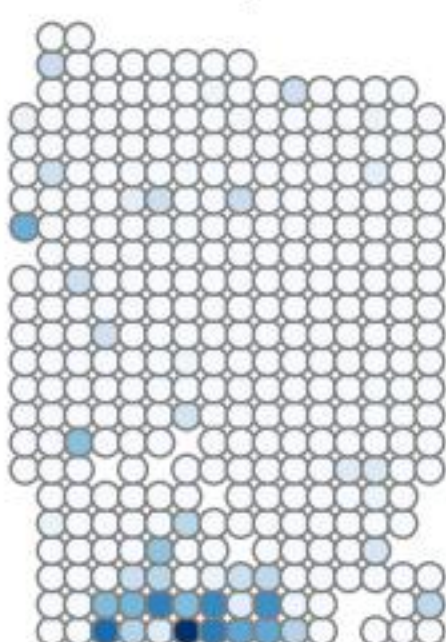

Cycling Myeloid

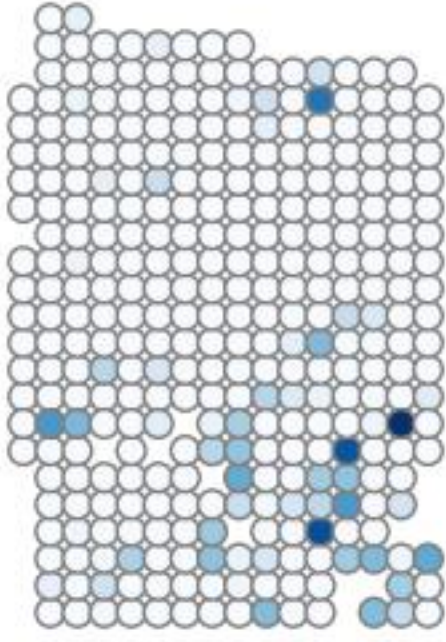

DCs

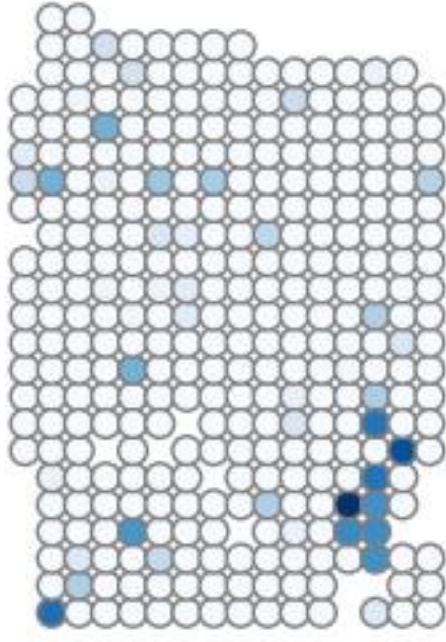

Macrophages

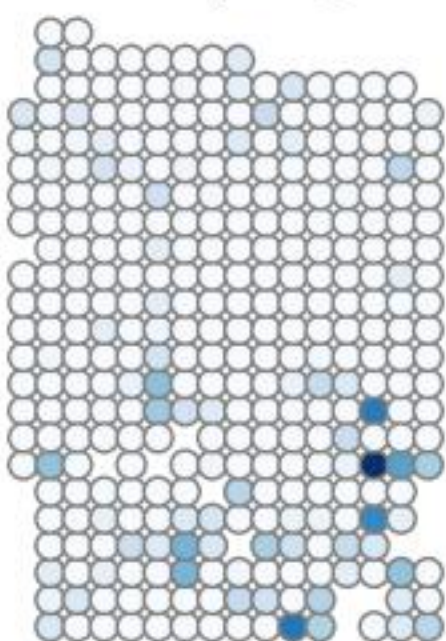

Monocytes

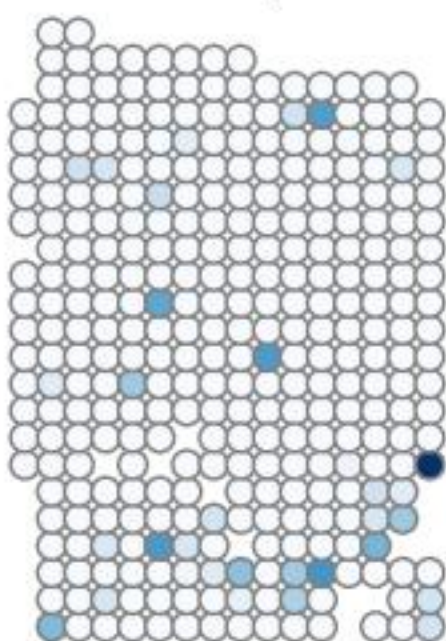

Plasma Cells

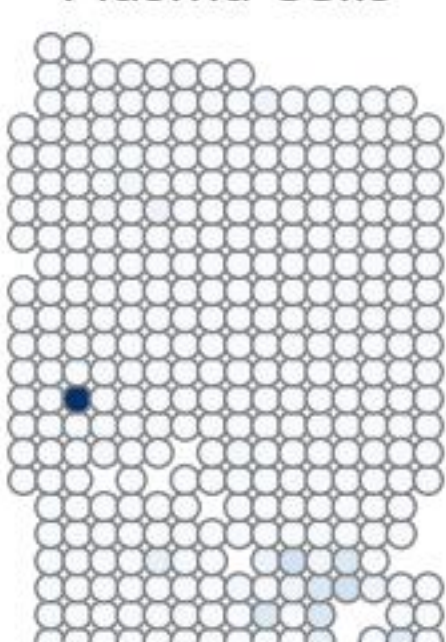

PVL Differentiated

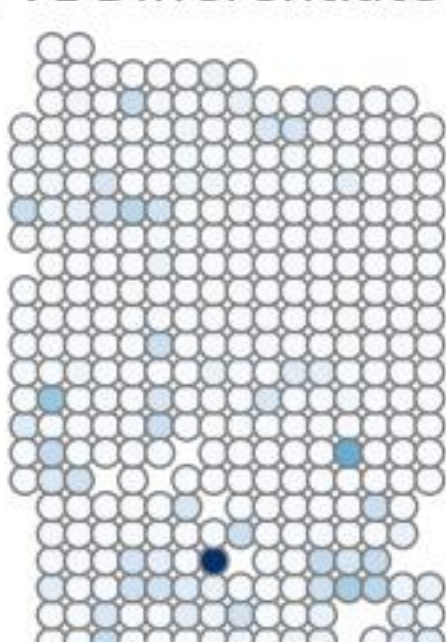

PVL Immature

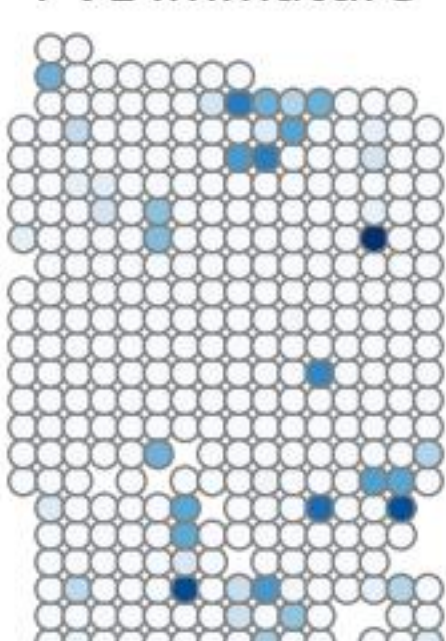

CD4+ T-cells

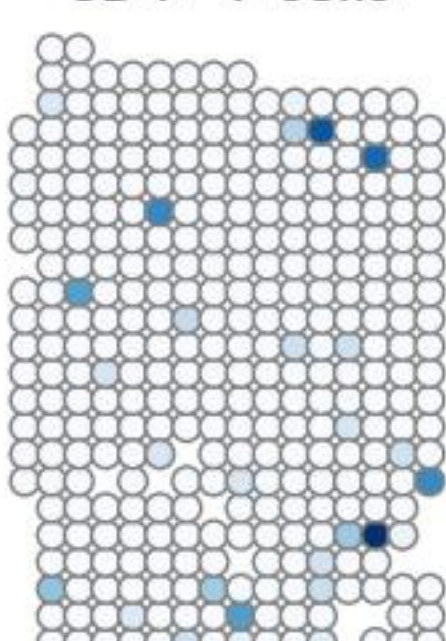

CD8+ T-cells

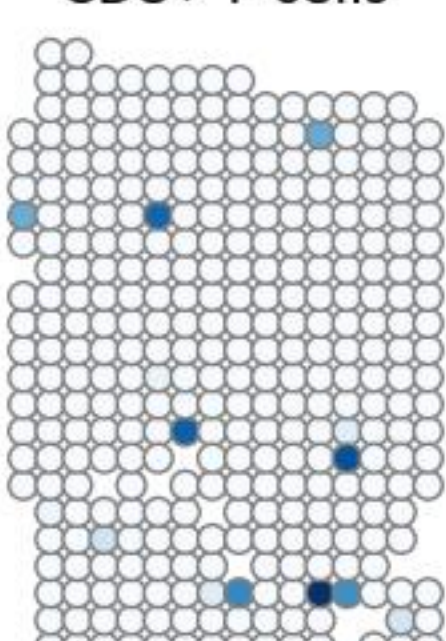

Cycling T-cells

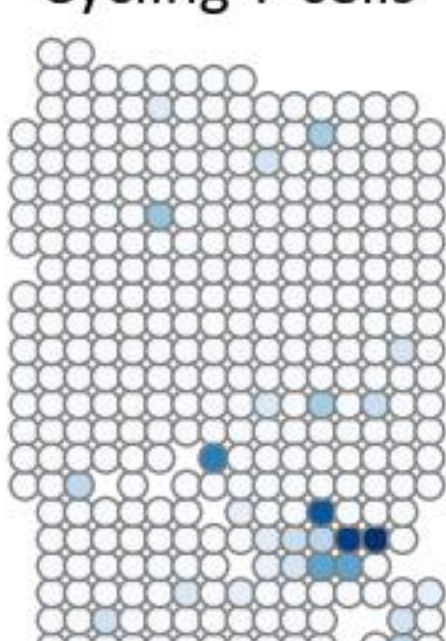

NK cells

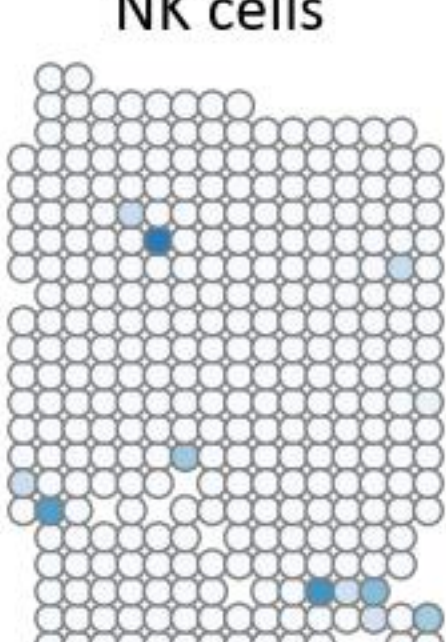

NKT cells

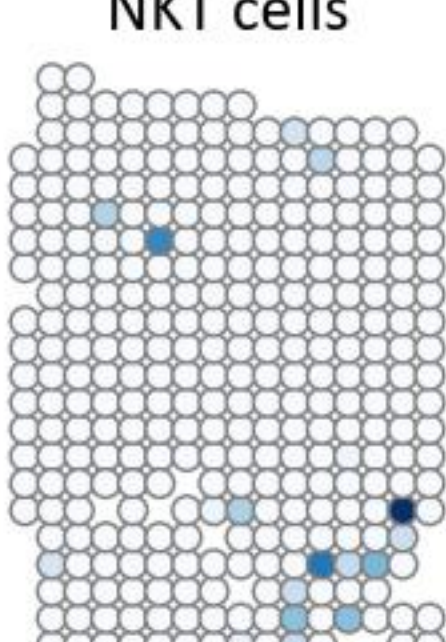

# minor\_A4

B-cells Memory

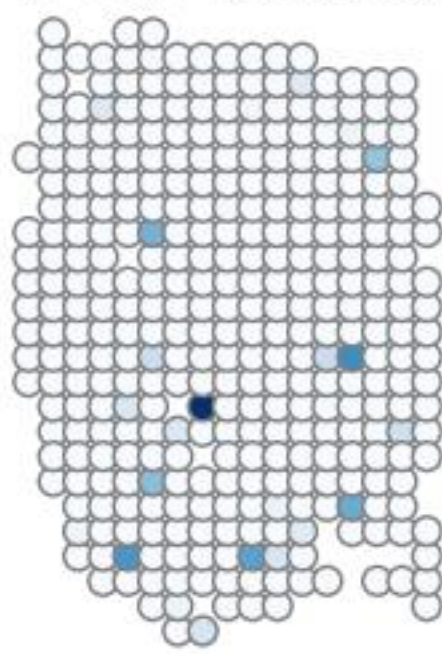

B-cells Naive

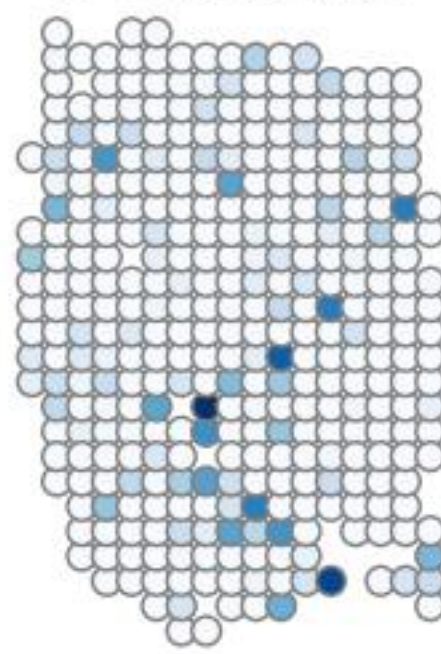

CAFs MSC/iCAF-like

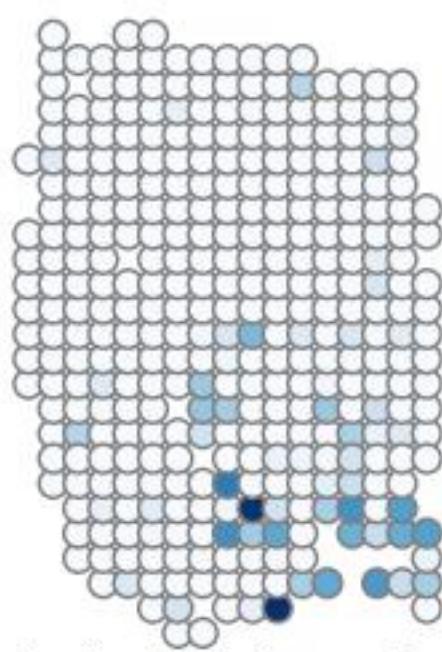

CAFs myCAF-like

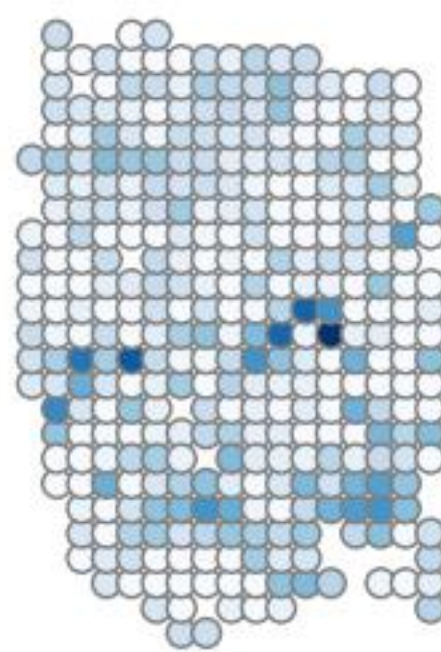

Endothelial Lymphatic  
LYVE1

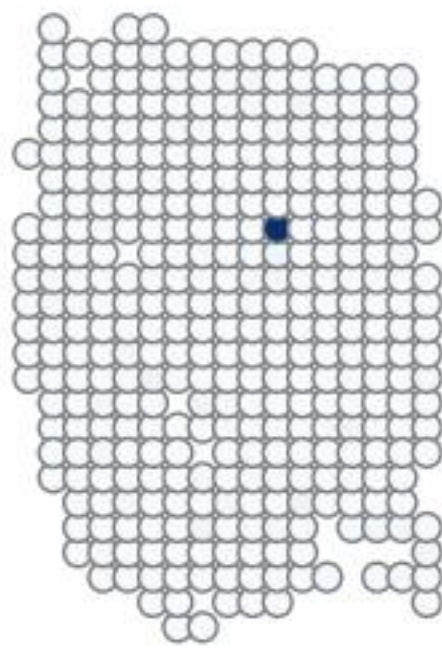

Endothelial RGS5

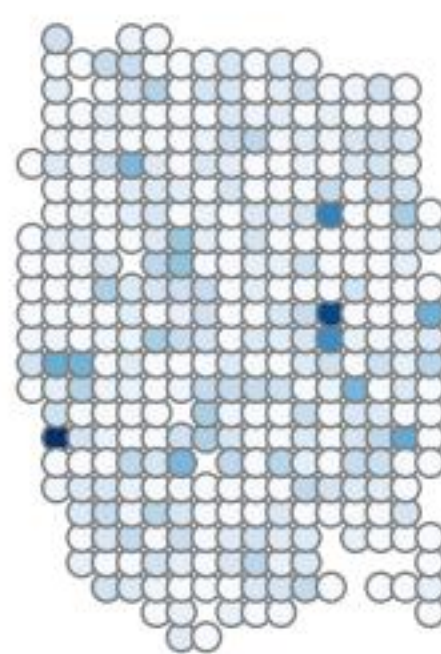

Endothelial CXCL12

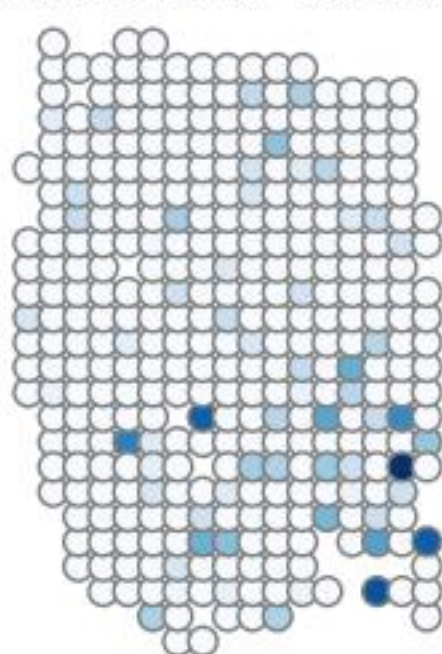

Endothelial ACKR1

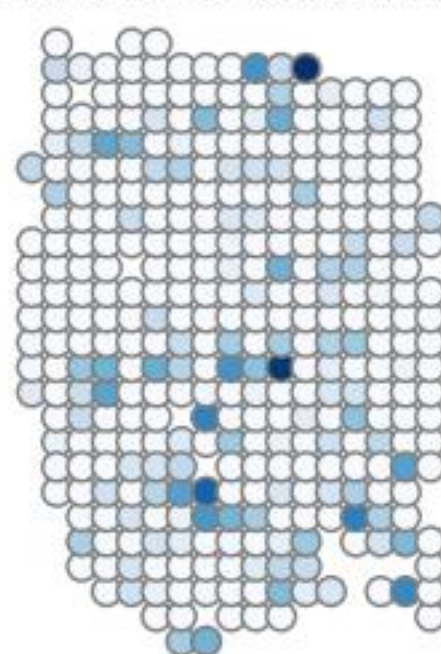

Cancer Epithelial

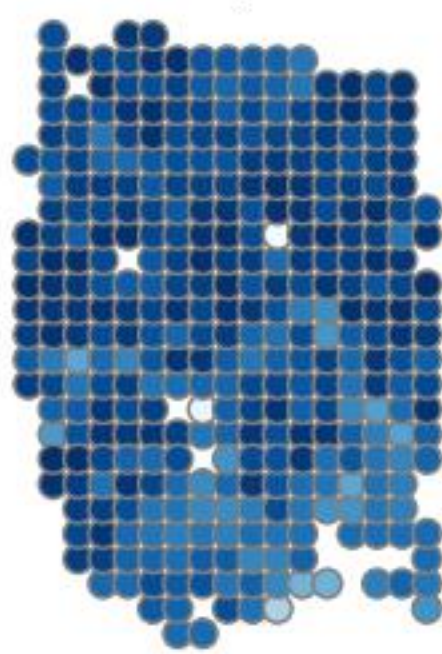

Normal Epithelial

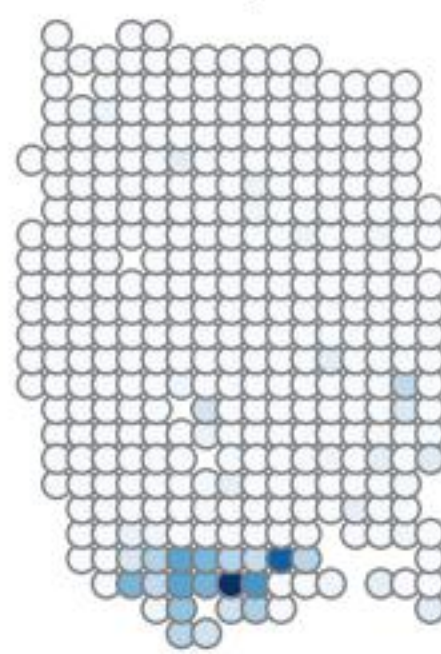

Cycling Myeloid

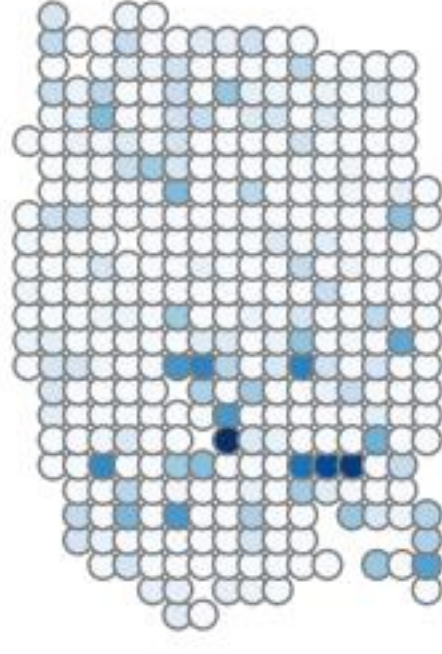

DCs

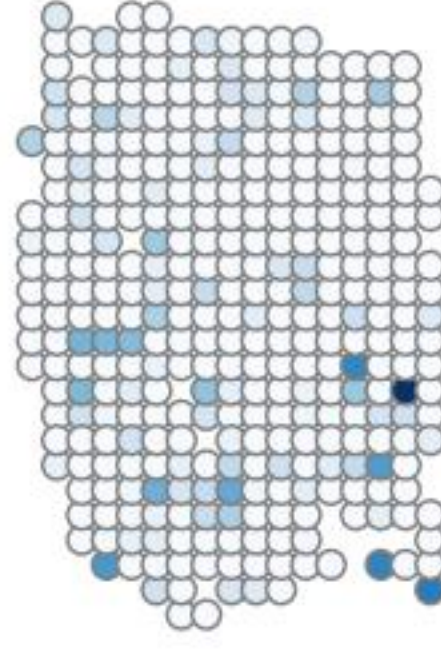

Macrophages

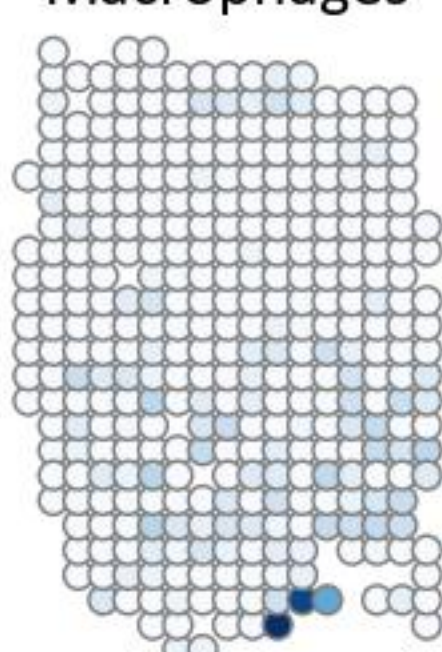

Monocytes

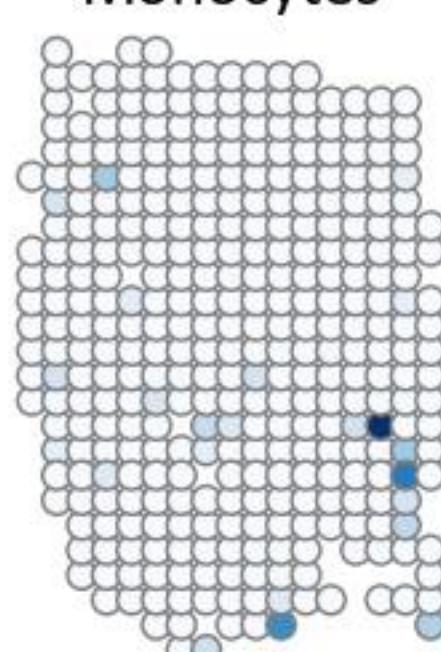

Plasma Cells

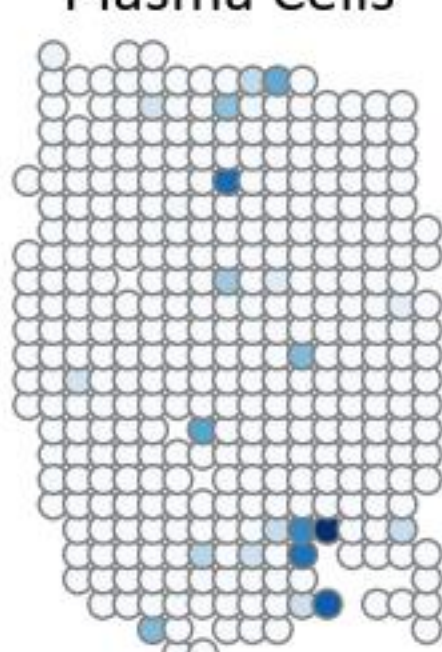

PVL Differentiated

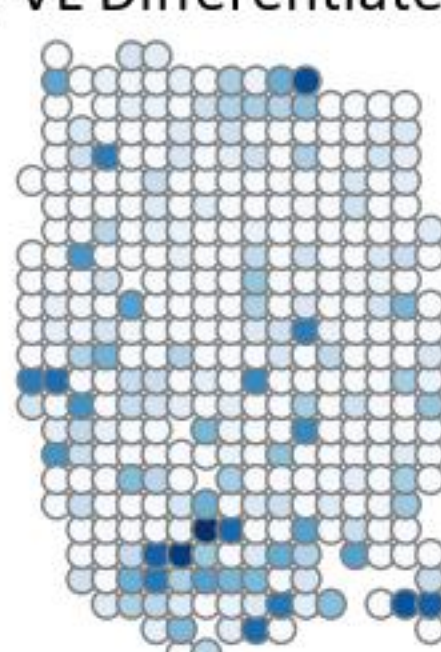

PVL Immature

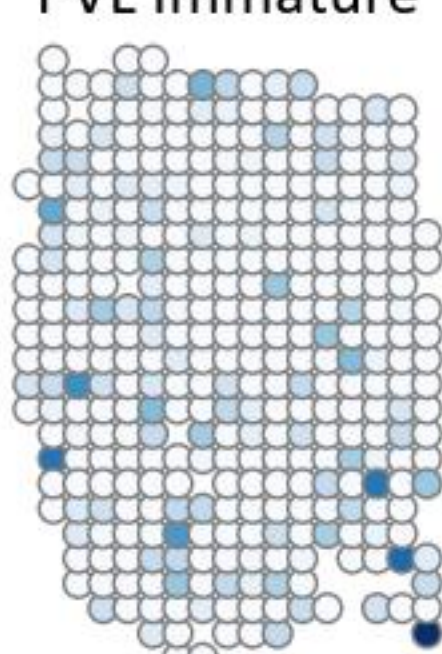

CD4+ T-cells

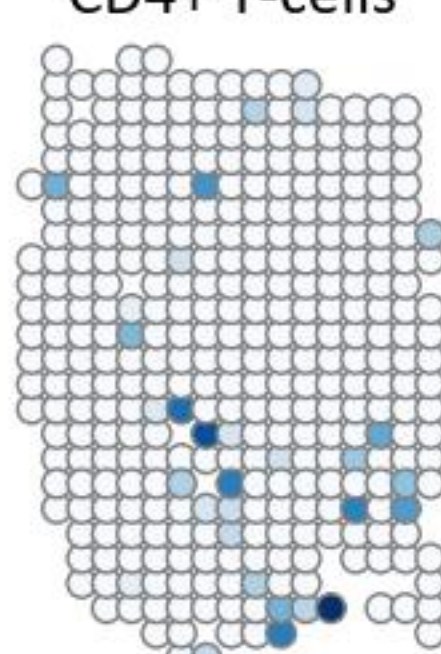

CD8+ T-cells

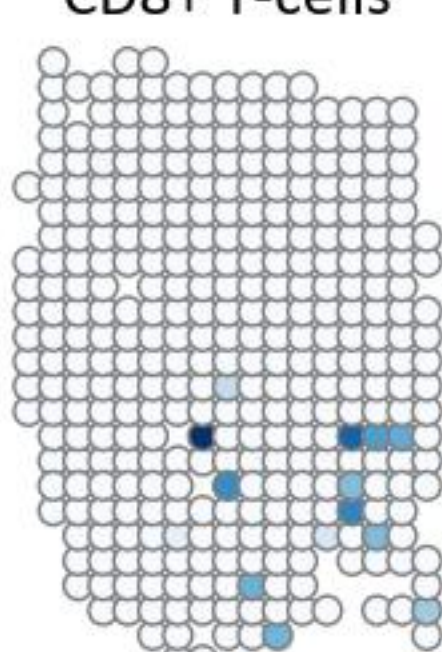

Cycling T-cells

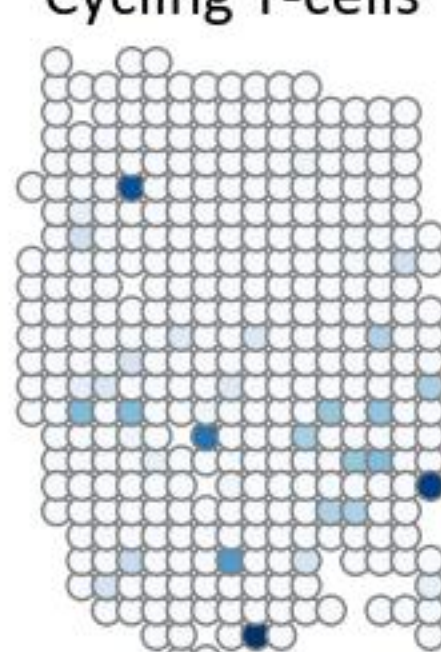

NK cells

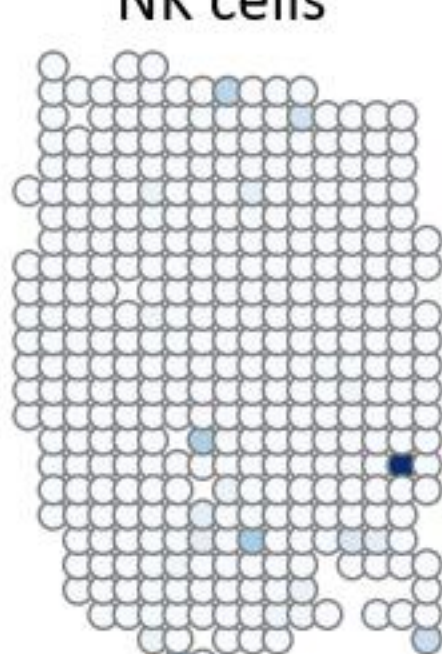

NKT cells

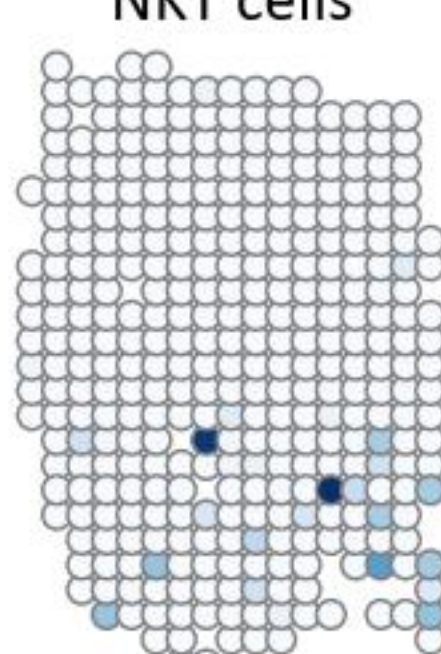

# minor\_A1

B-cells Memory

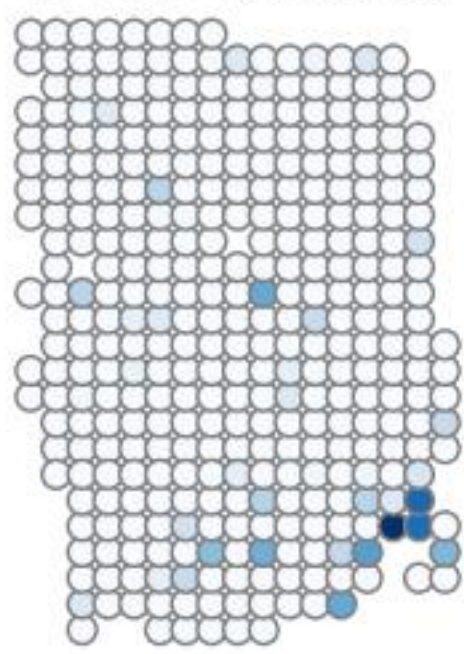

B-cells Naive

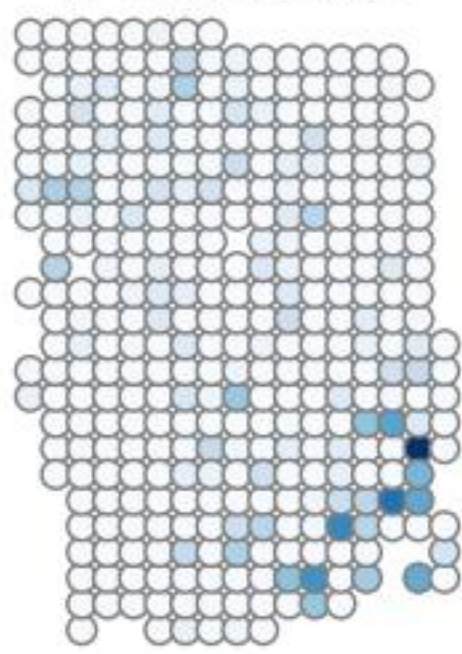

CAFs MSC/iCAF-like

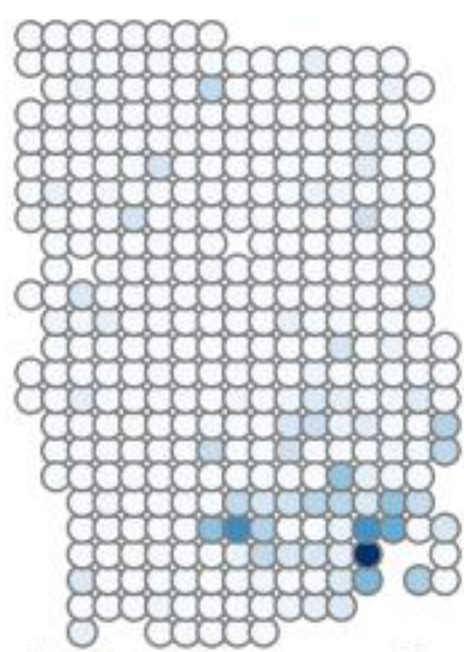

CAFs myCAF-like

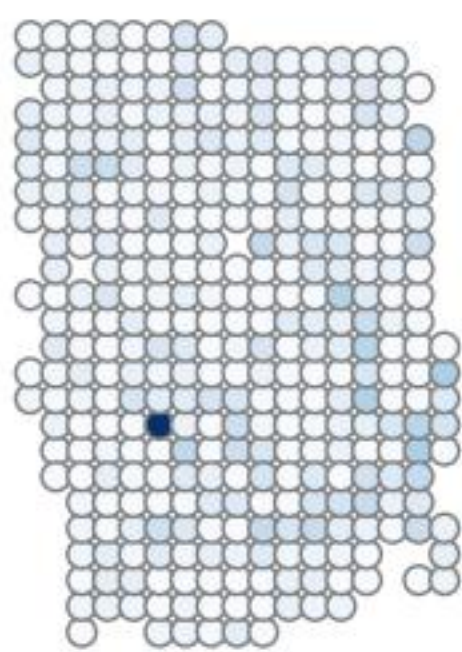

Endothelial Lymphatic  
LYVE1

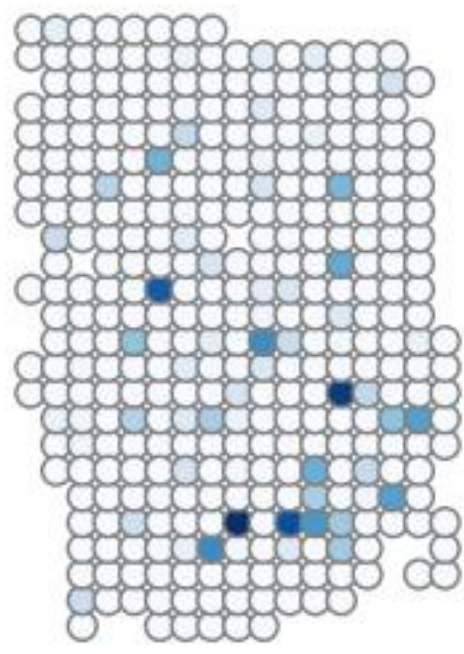

Endothelial RGS5

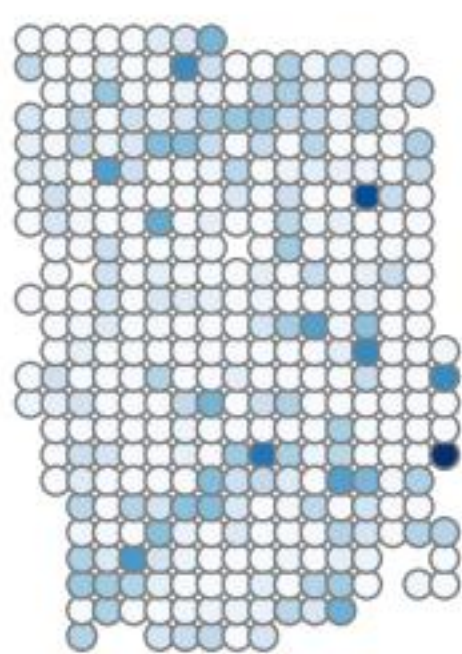

Endothelial CXCL12

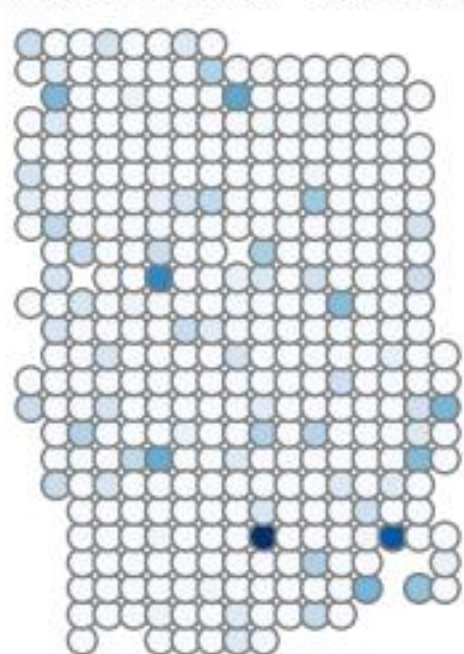

Endothelial ACKR1

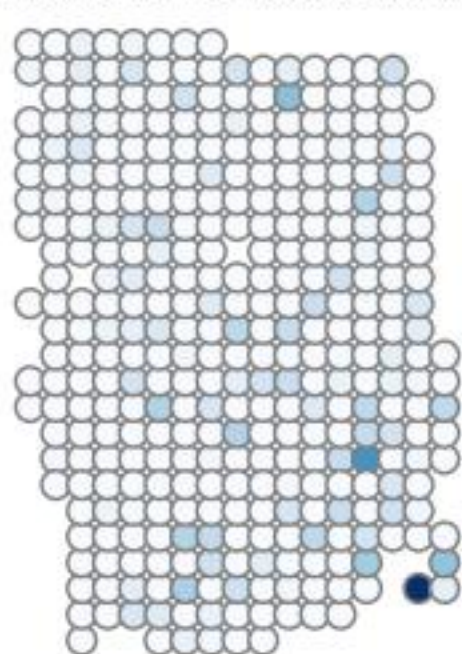

Cancer Epithelial

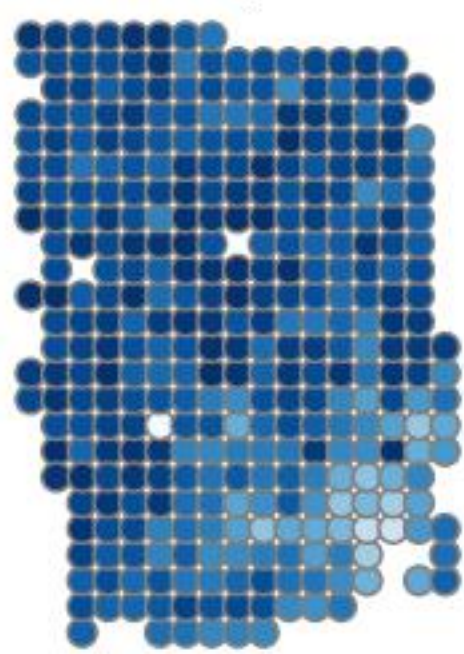

Normal Epithelial

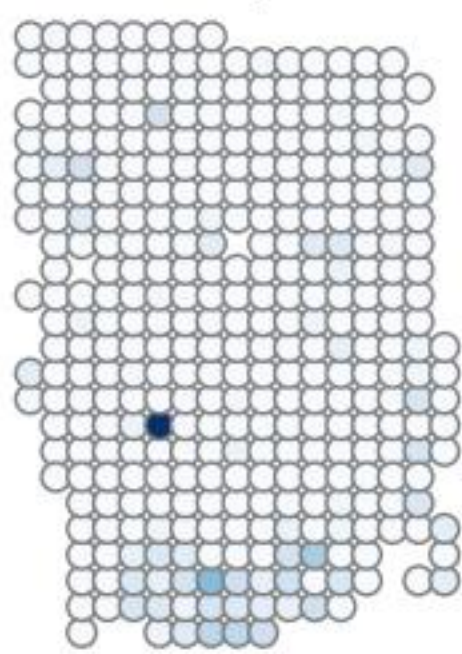

Cycling Myeloid

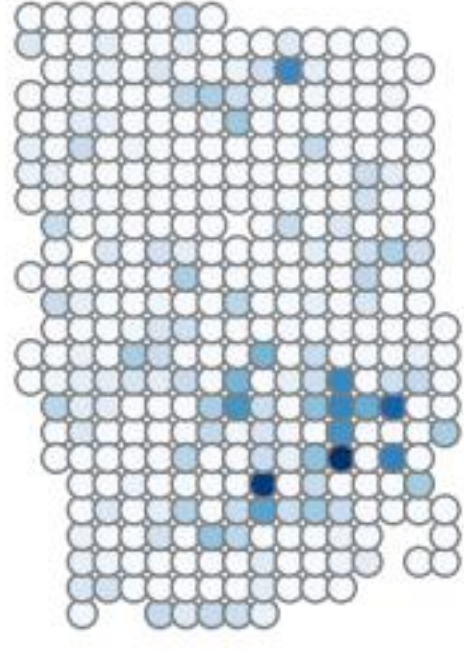

DCs

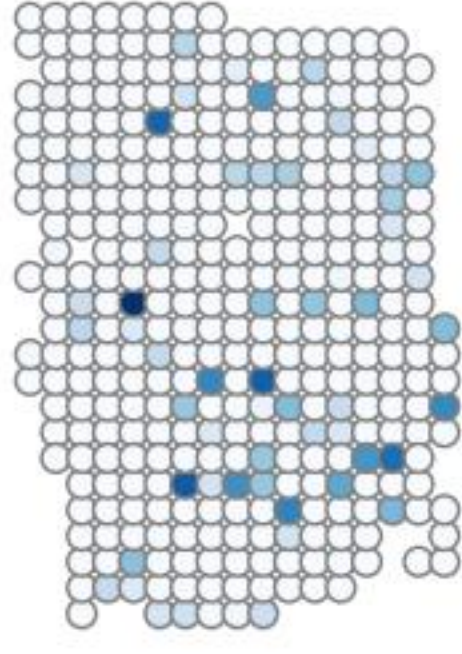

Macrophages

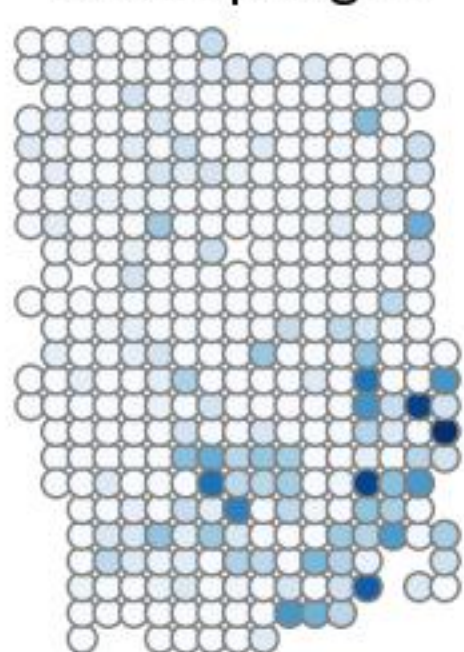

Monocytes

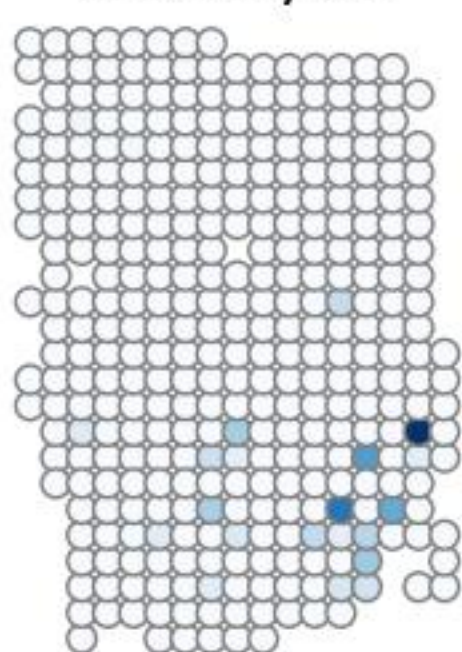

Plasma Cells

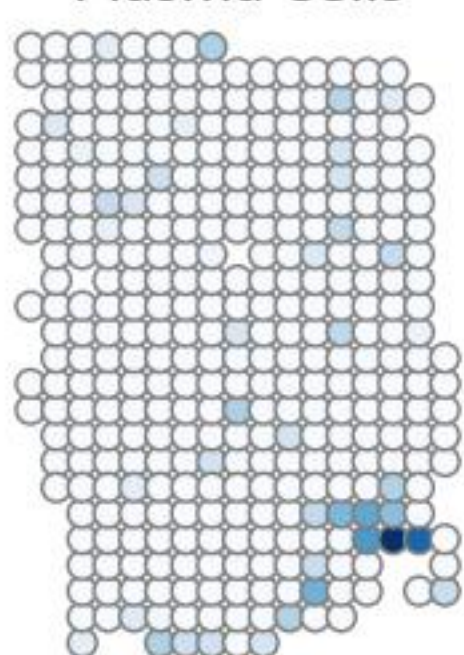

PVL Differentiated

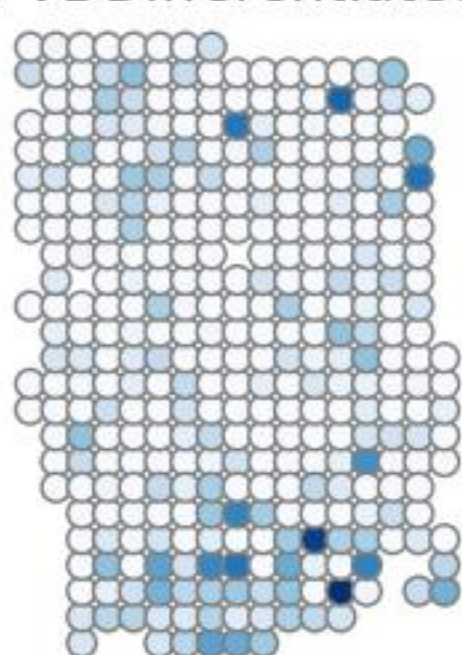

PVL Immature

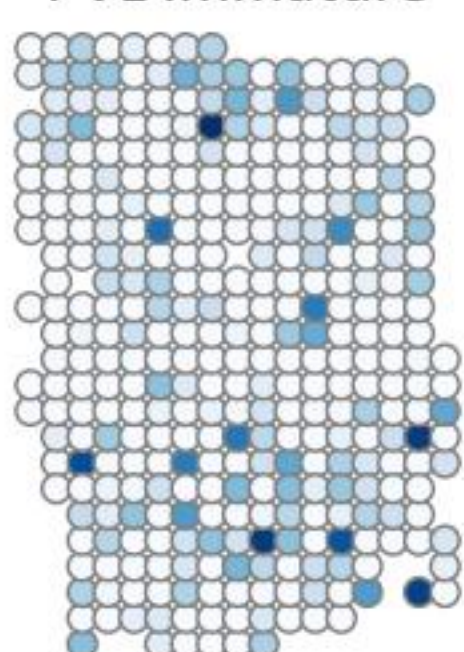

CD4+ T-cells

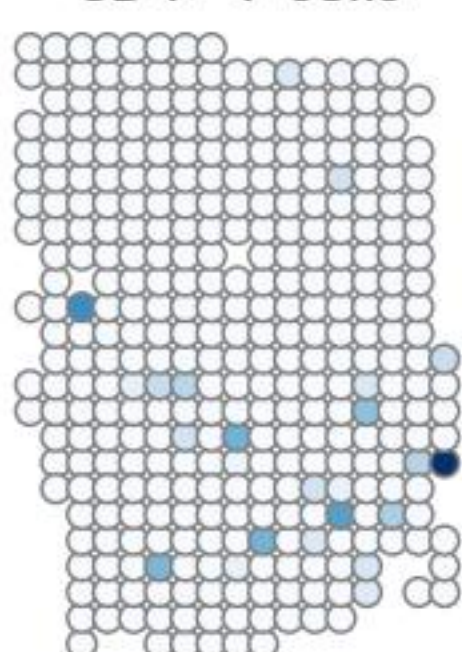

CD8+ T-cells

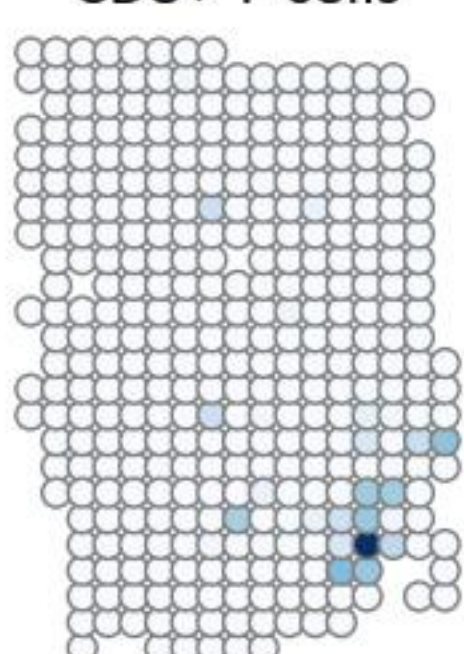

Cycling T-cells

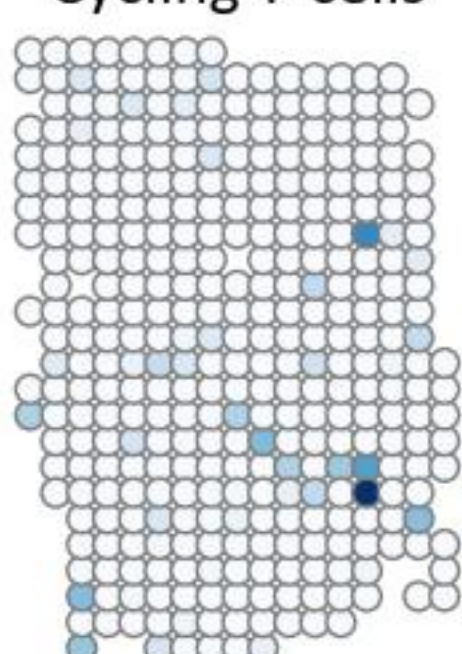

NK cells

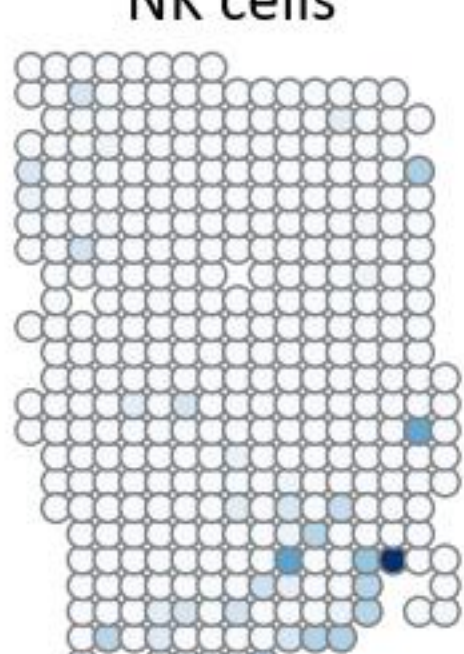

NKT cells

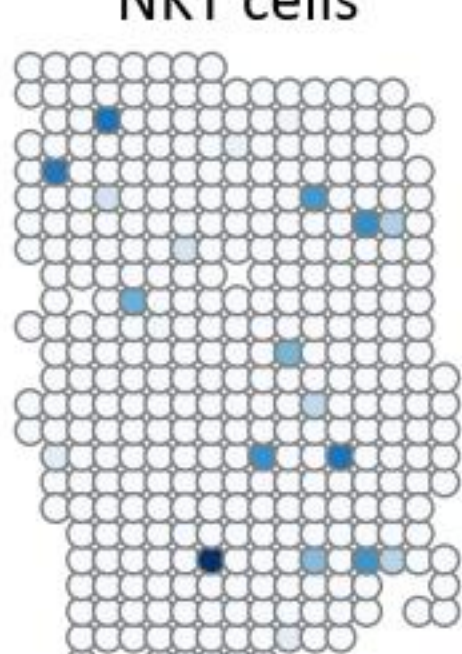

# minor\_D1

B-cells Memory

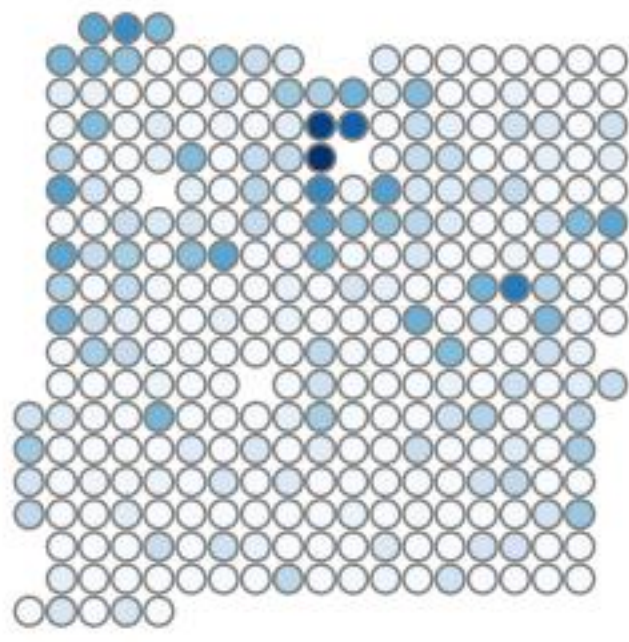

B-cells Naive

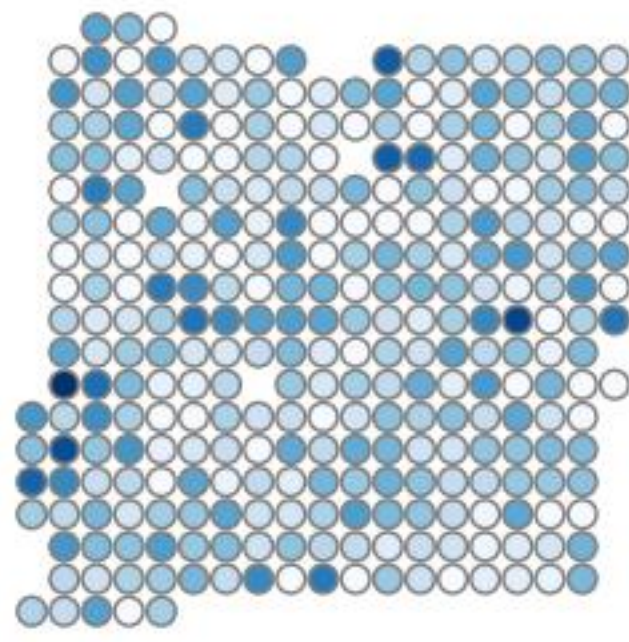

CAFs MSC/iCAF-like

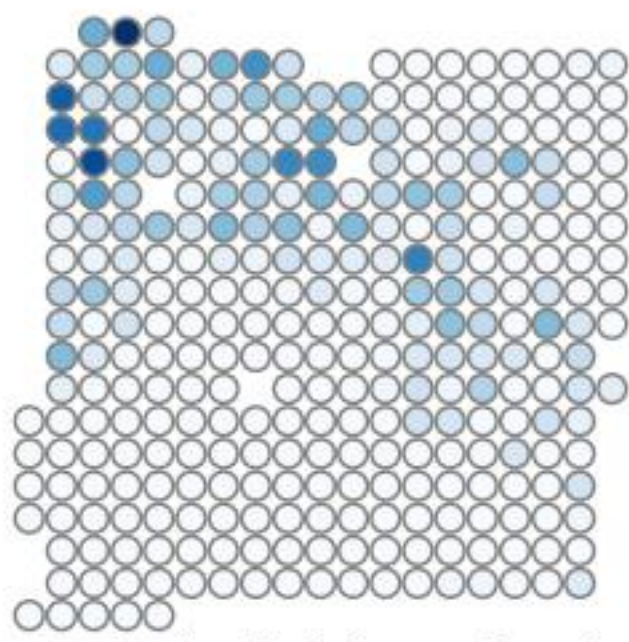

CAFs myCAF-like

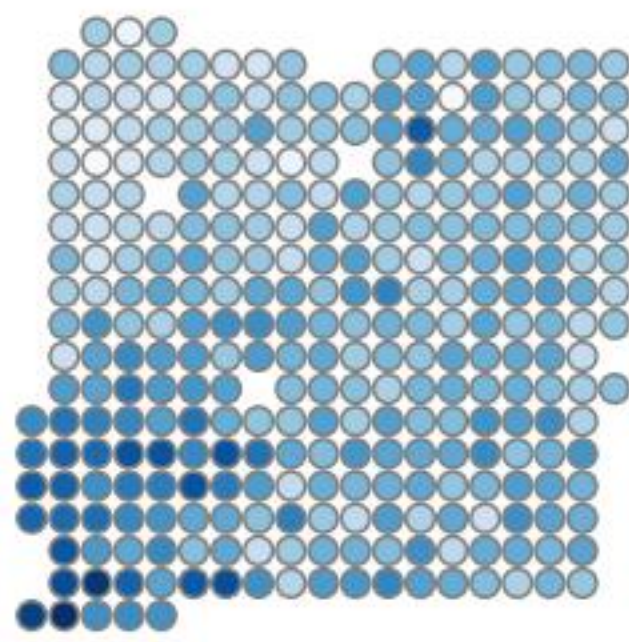

Endothelial Lymphatic LYVE1

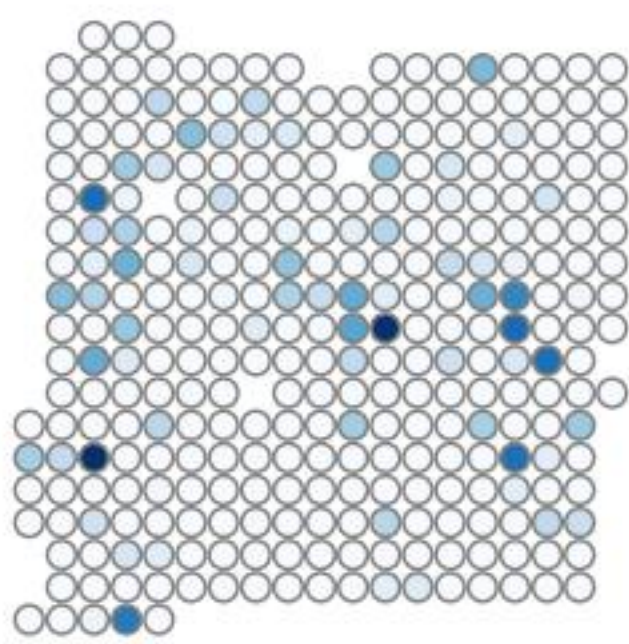

Endothelial RGS5

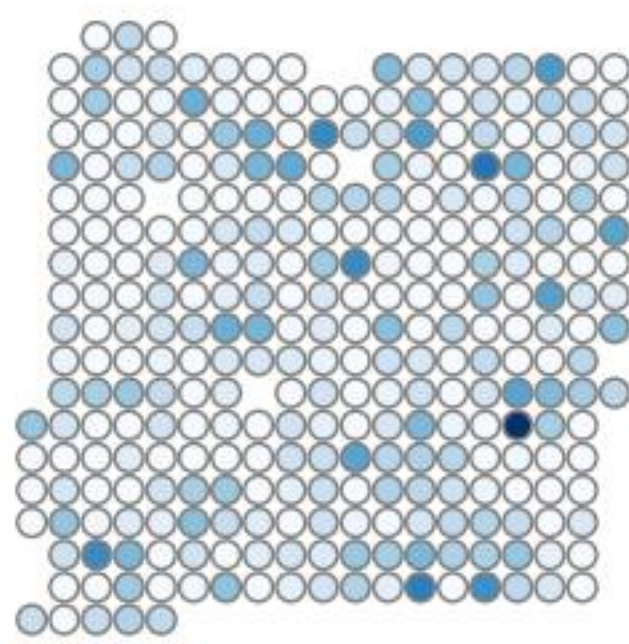

Endothelial CXCL12

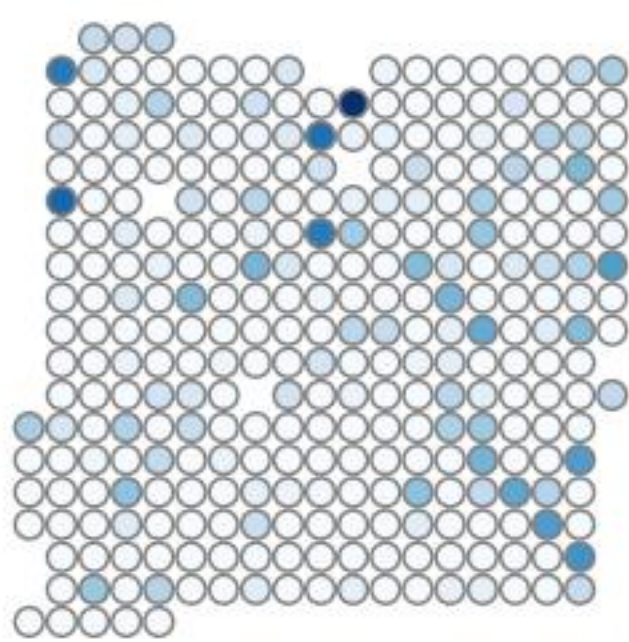

Endothelial ACKR1

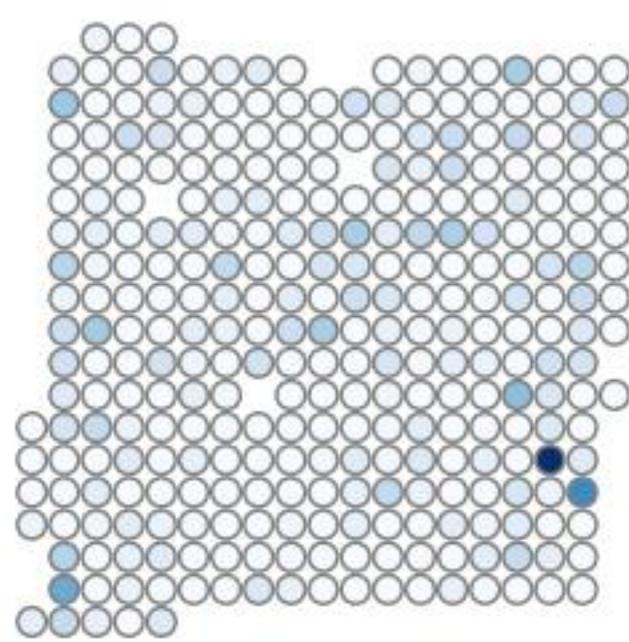

Cancer Epithelial

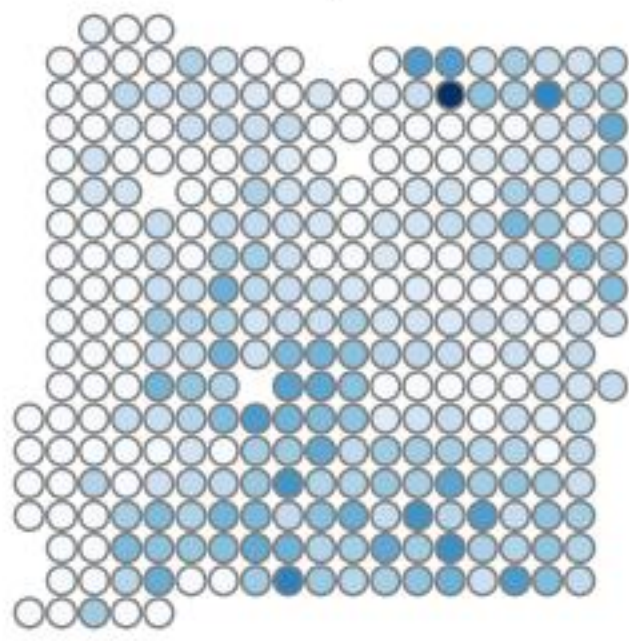

Normal Epithelial

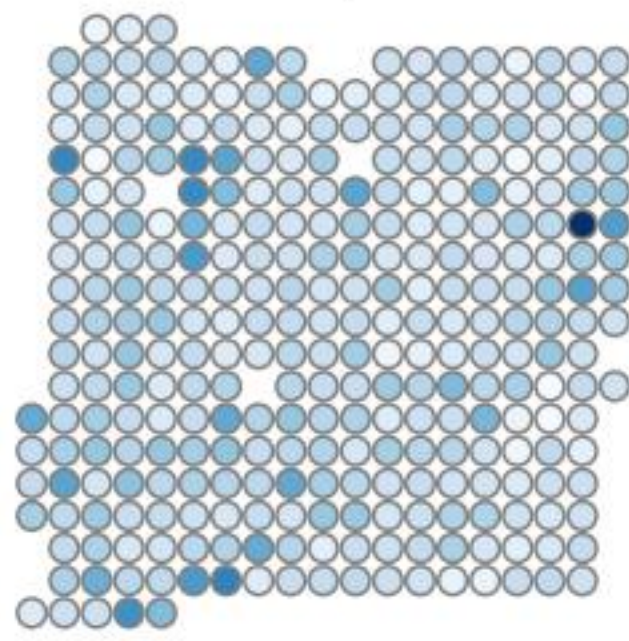

Cycling Myeloid

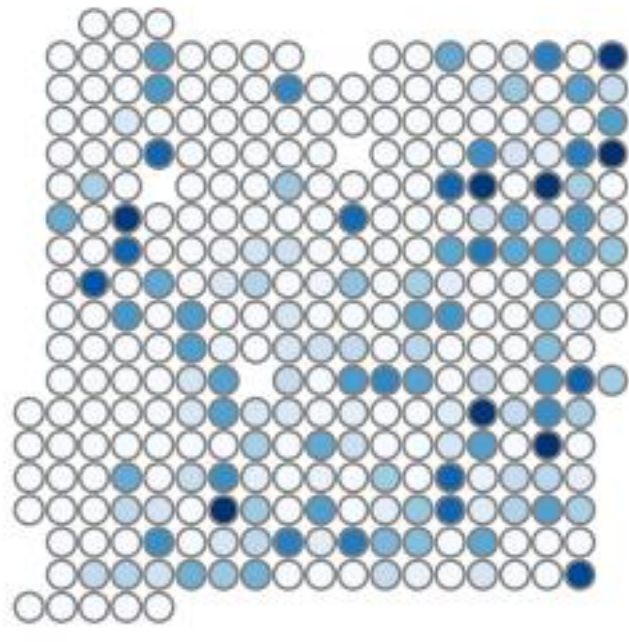

DCs

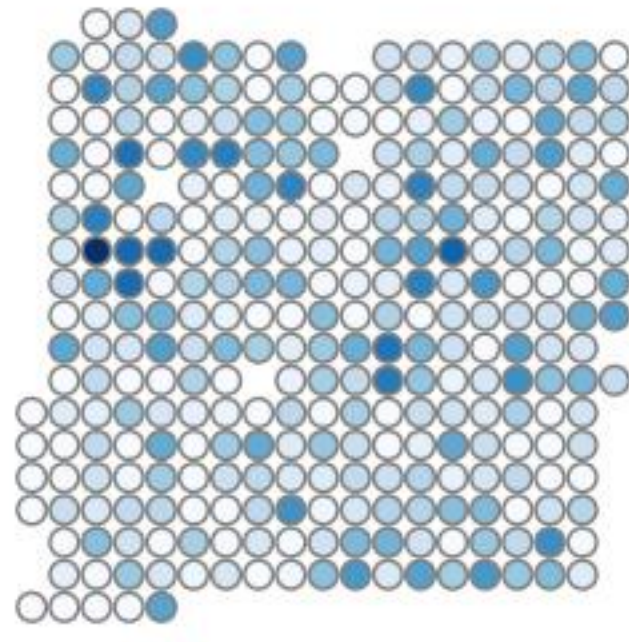

Macrophages

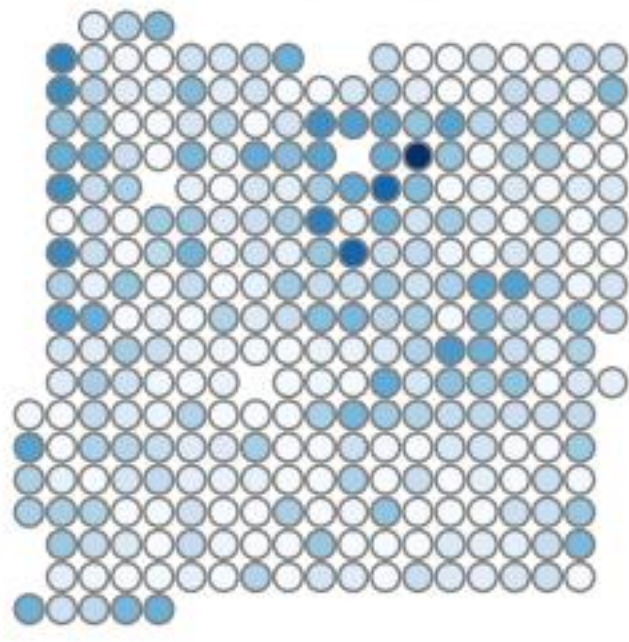

Monocytes

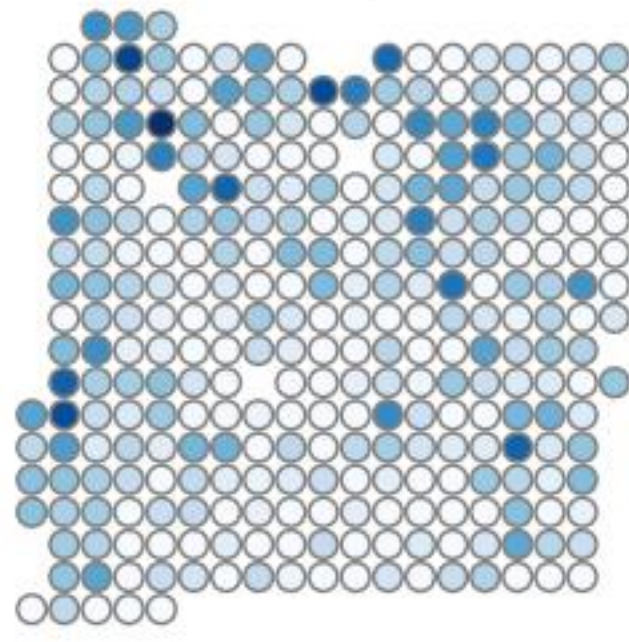

Plasma Cells

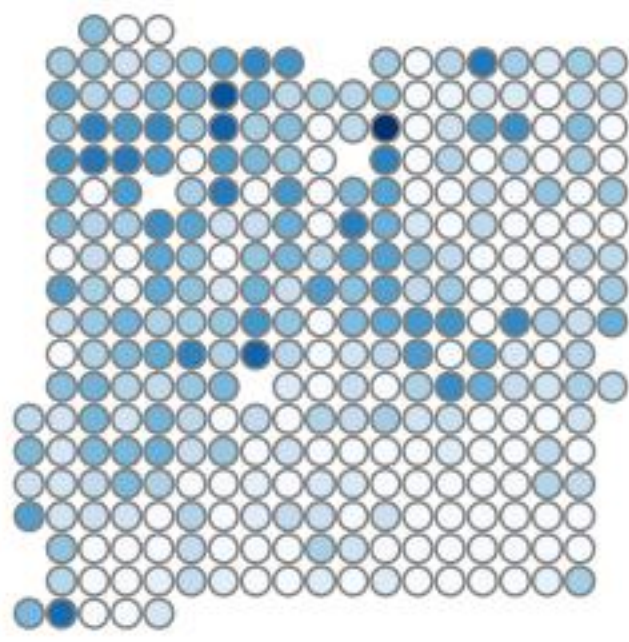

PVL Differentiated

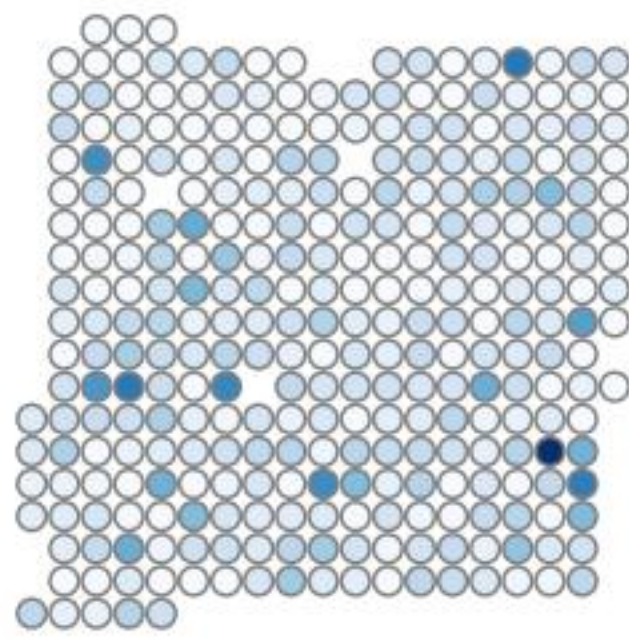

PVL Immature

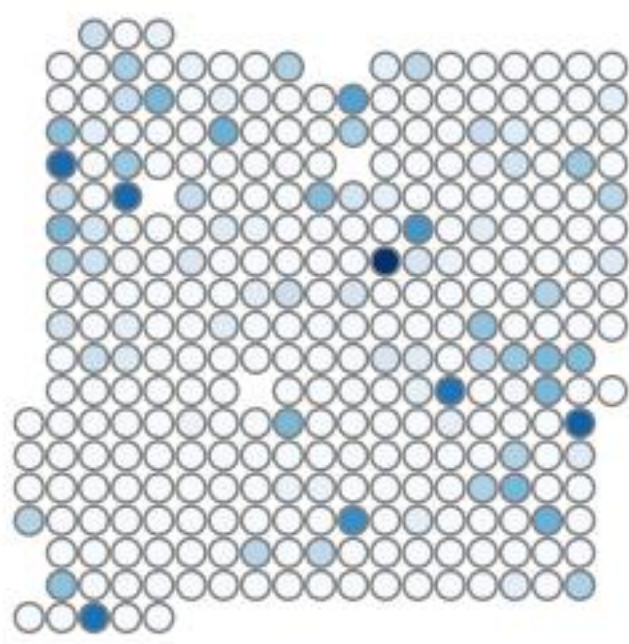

CD4+ T-cells

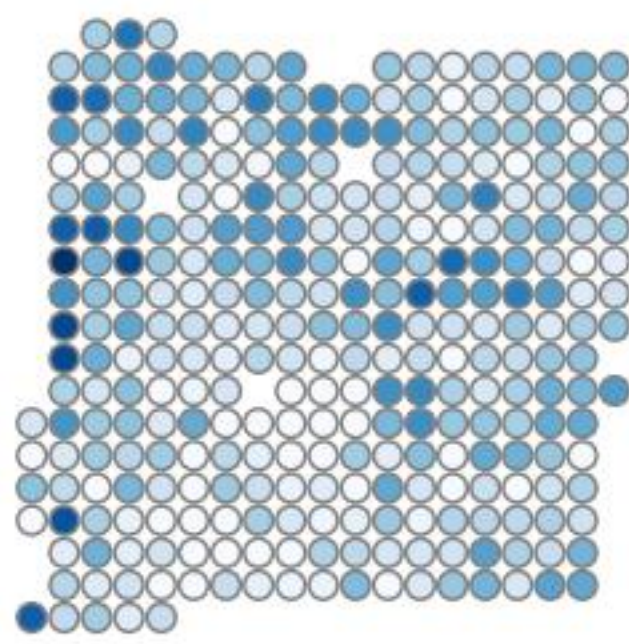

CD8+ T-cells

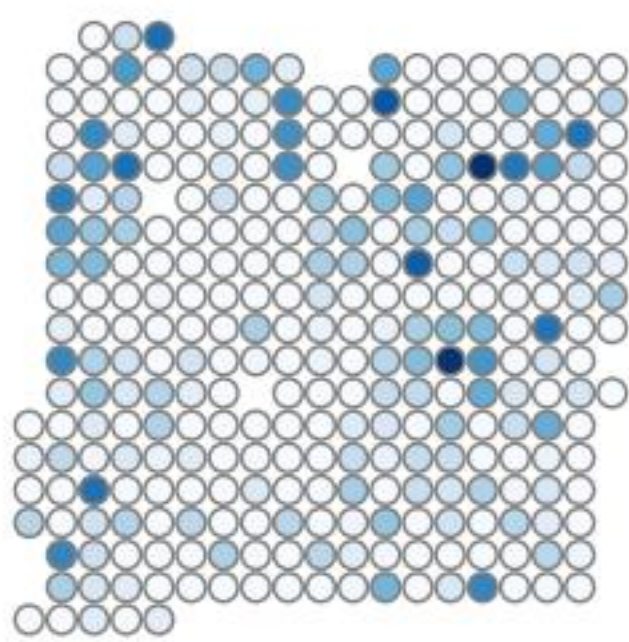

Cycling T-cells

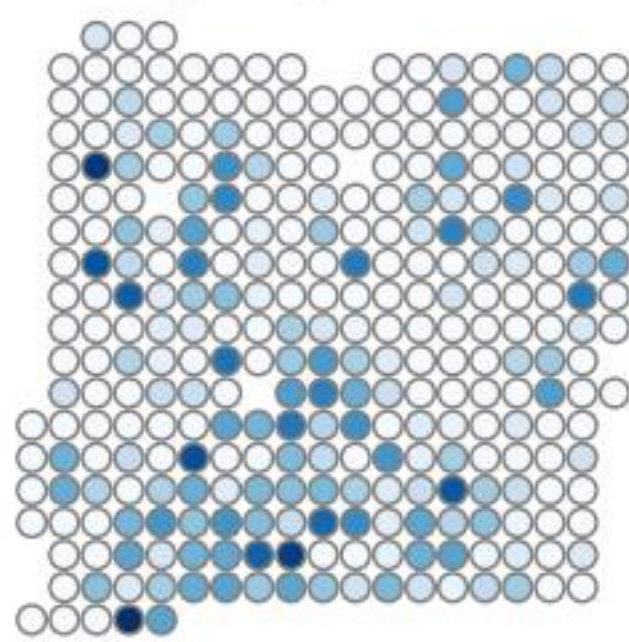

NK cells

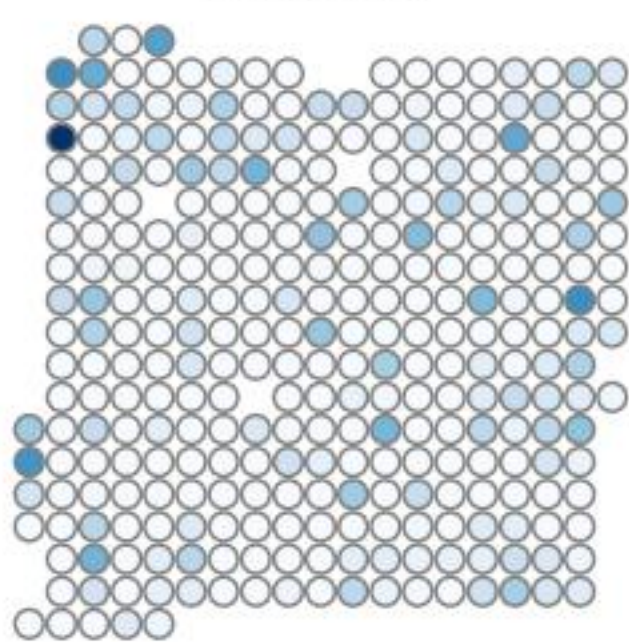

NKT cells

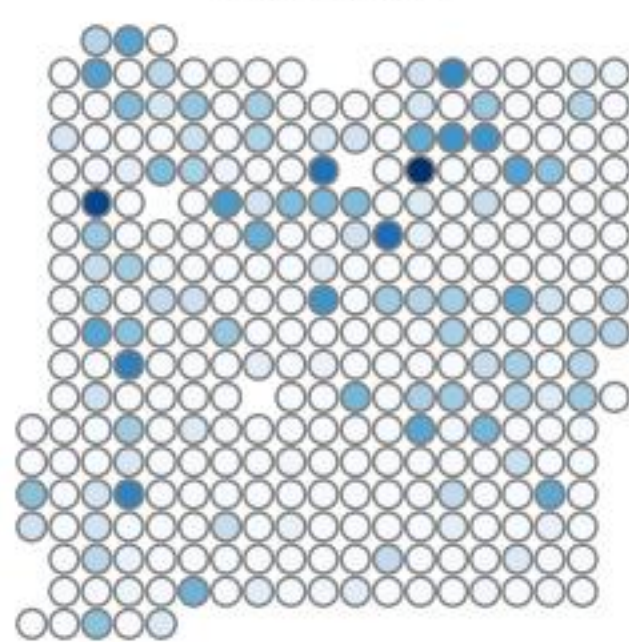

# minor\_C1

B-cells Memory

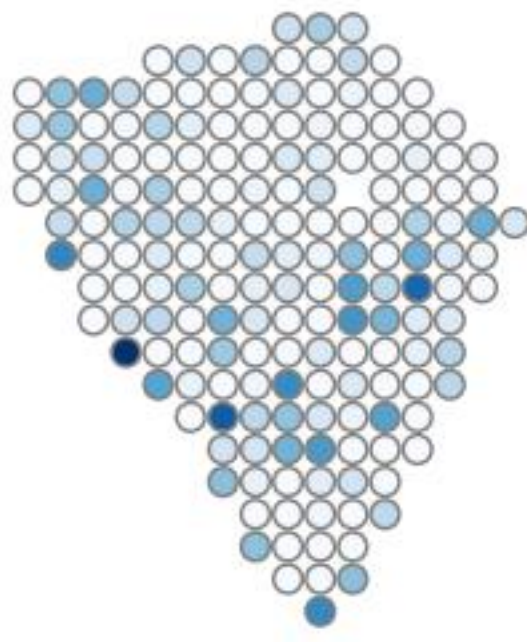

B-cells Naive

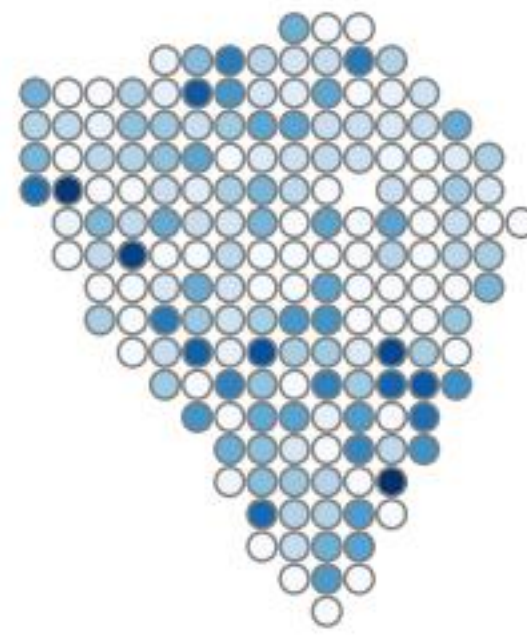

CAFs MSC/iCAF-like

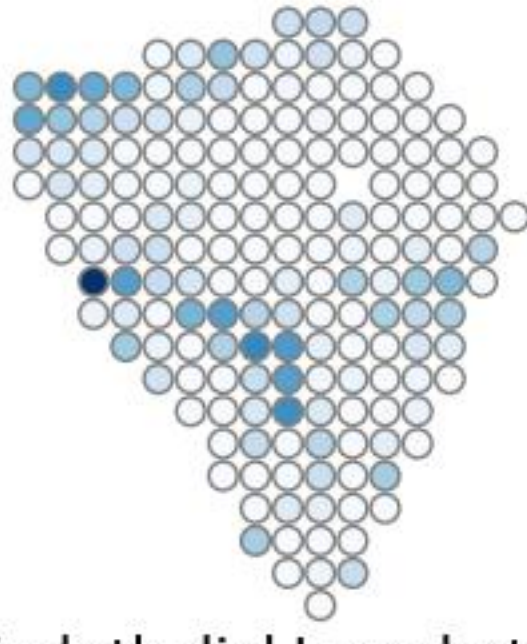

CAFs myCAF-like

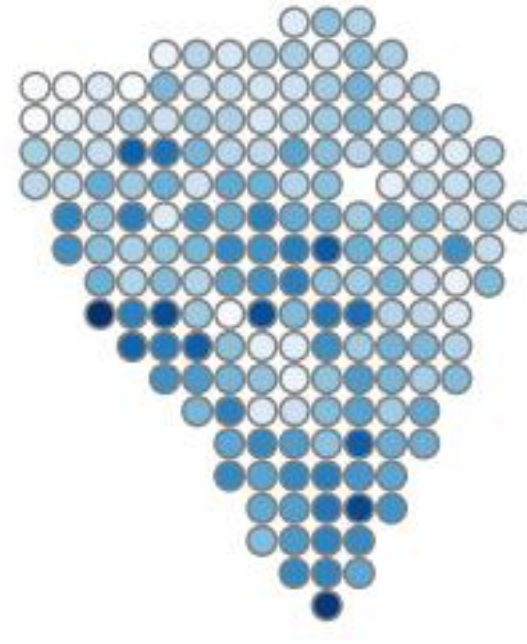

Endothelial Lymphatic  
LYVE1

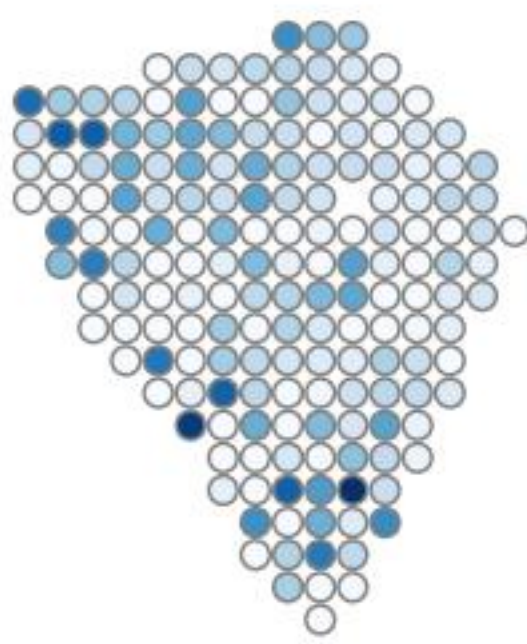

Endothelial RGS5

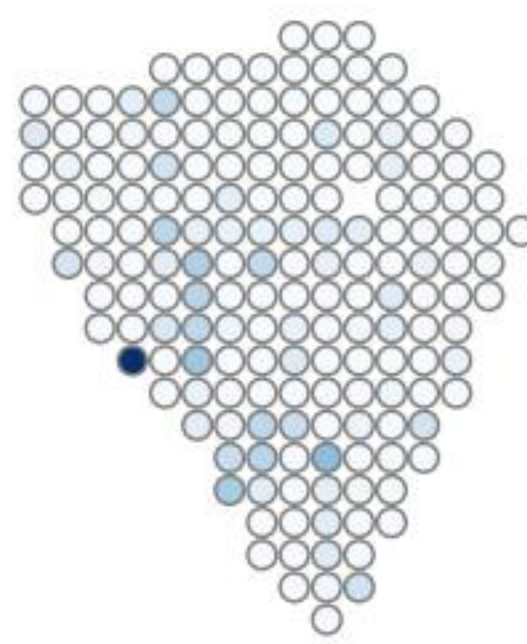

Endothelial CXCL12

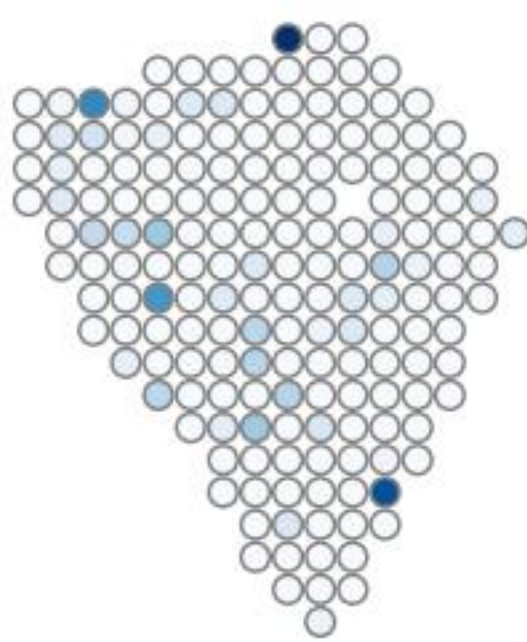

Endothelial ACKR1

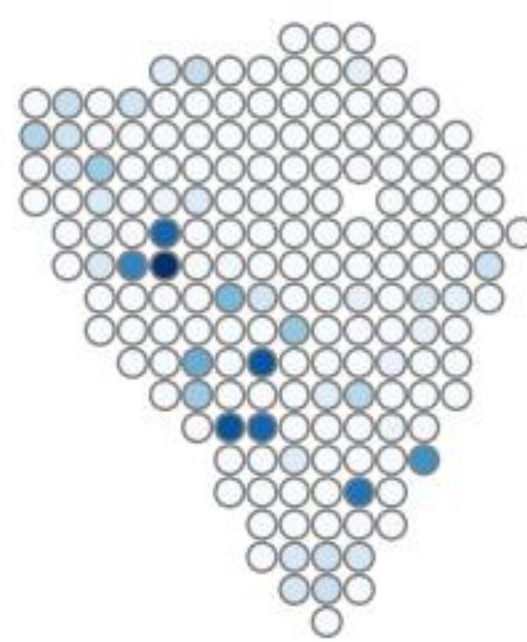

Cancer Epithelial

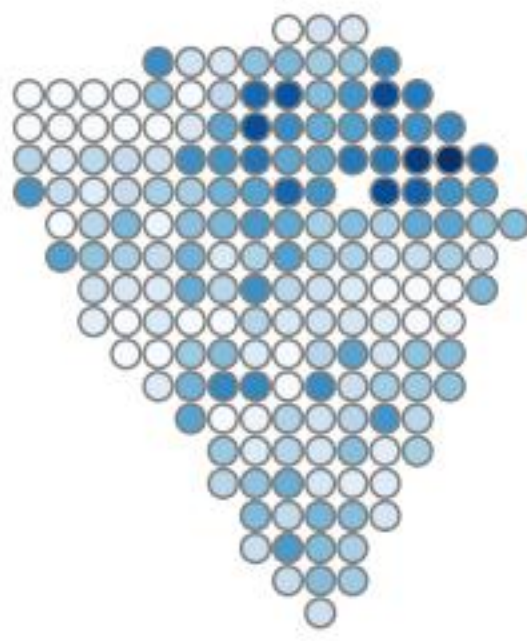

Normal Epithelial

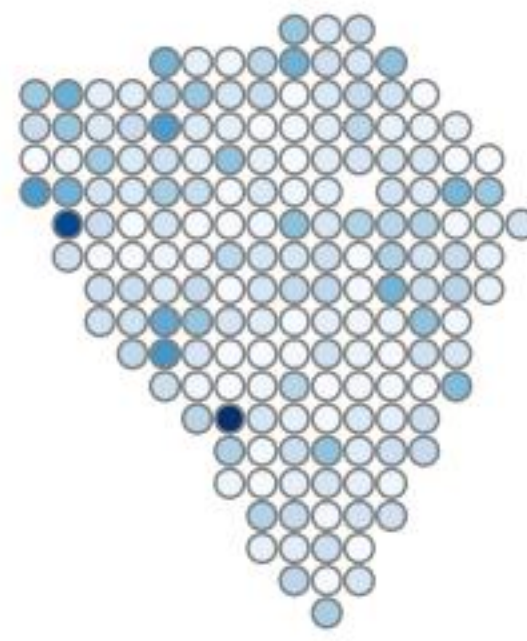

Cycling Myeloid

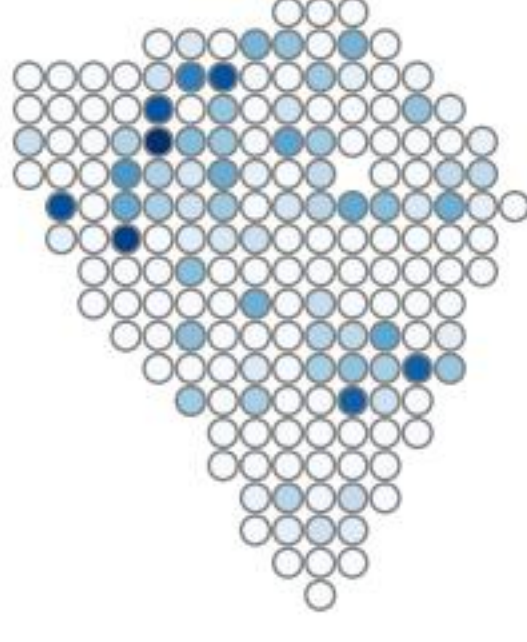

DCs

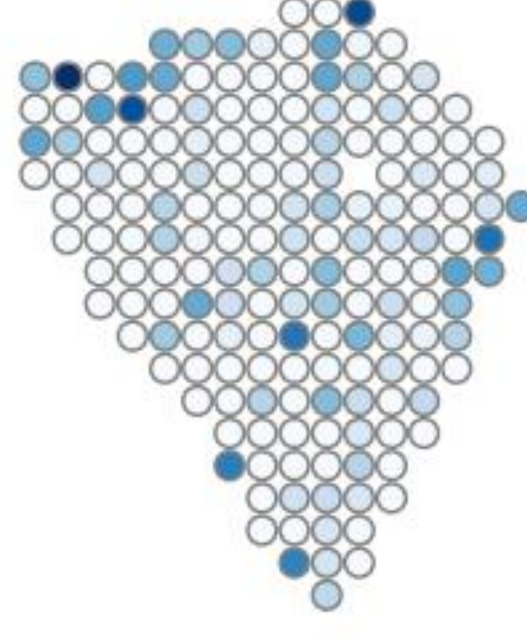

Macrophages

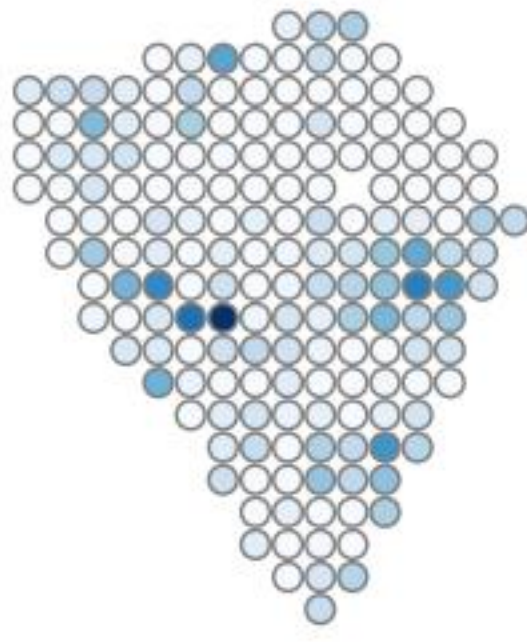

Monocytes

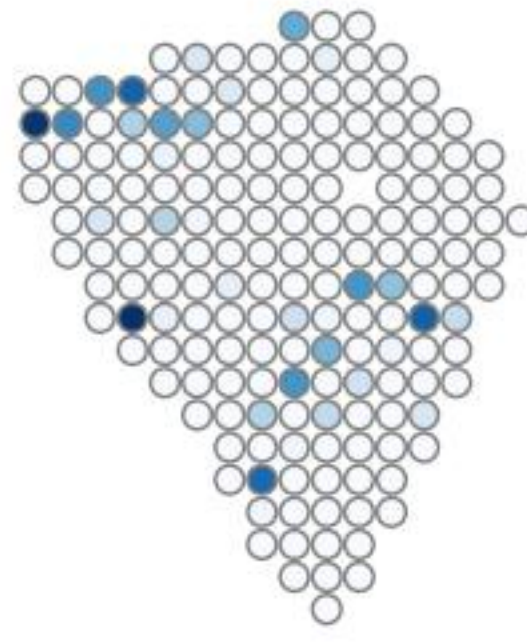

Plasma Cells

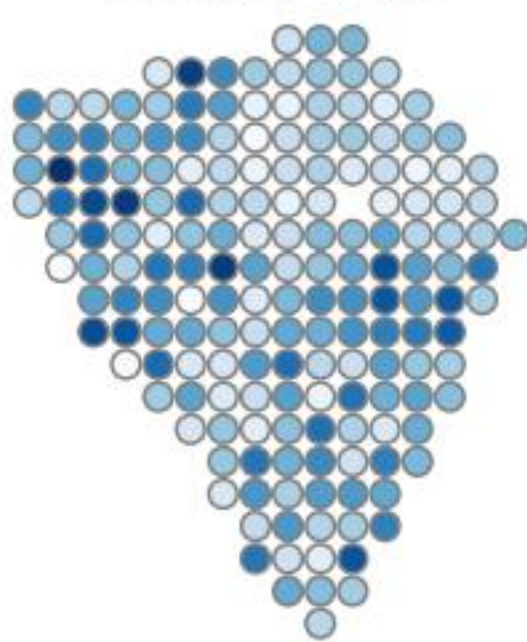

PVL Differentiated

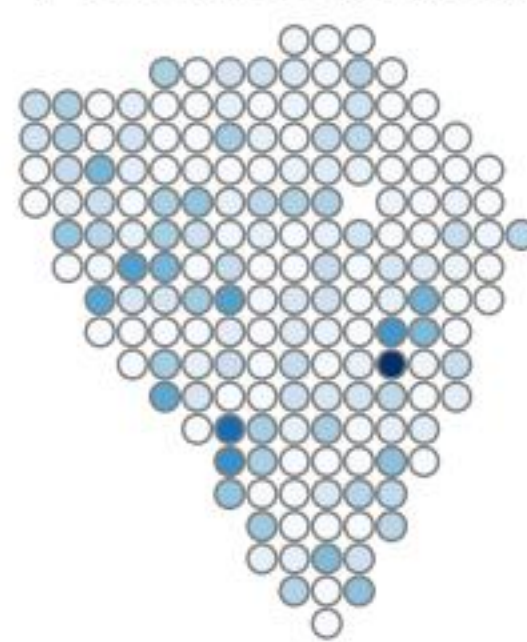

PVL Immature

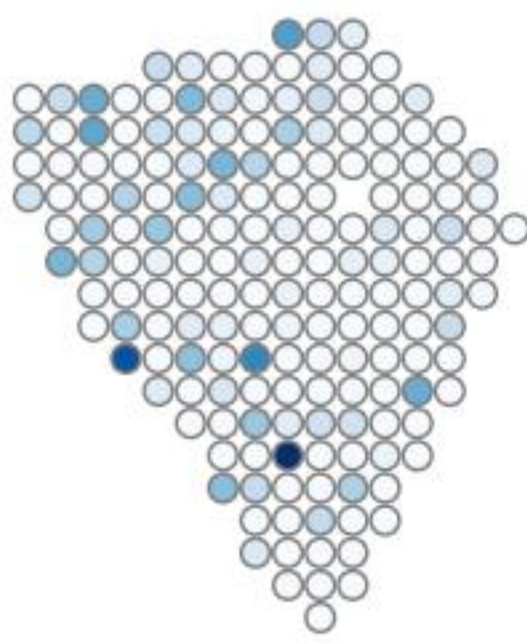

CD4+ T-cells

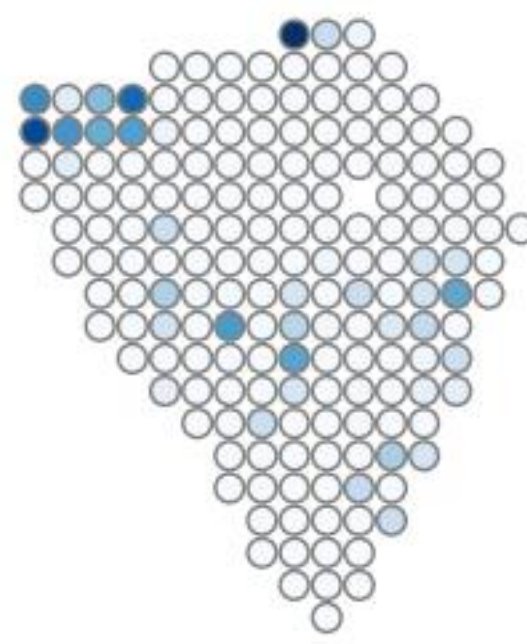

CD8+ T-cells

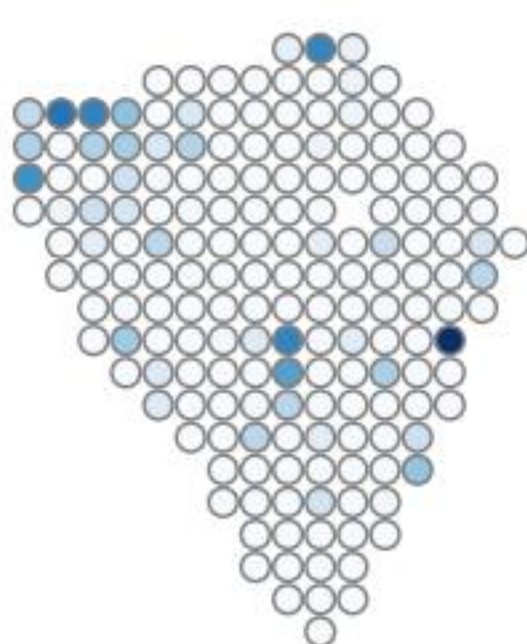

Cycling T-cells

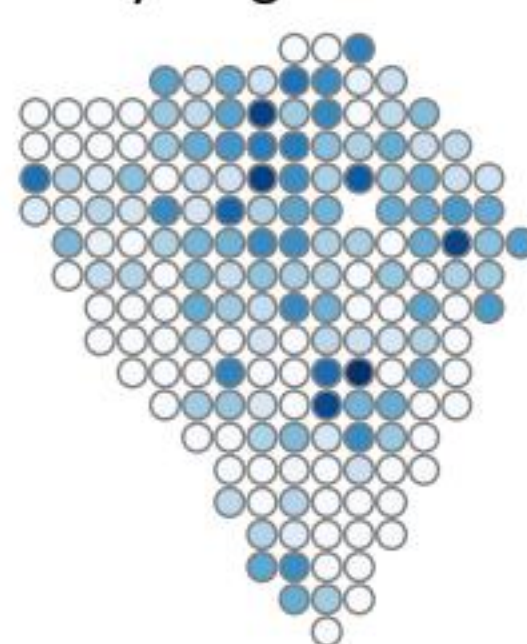

NK cells

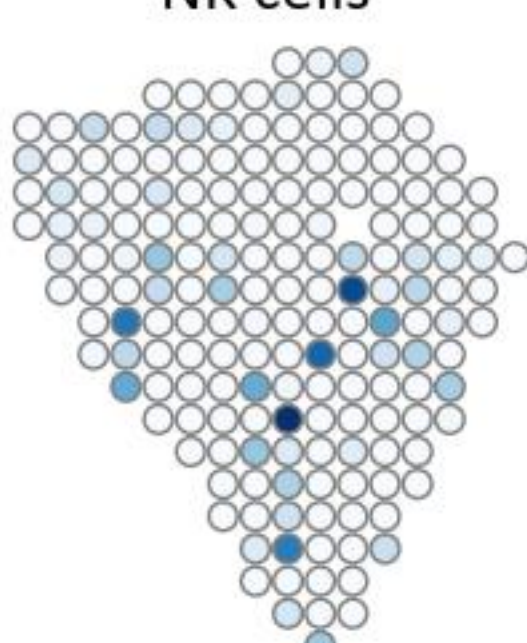

NKT cells

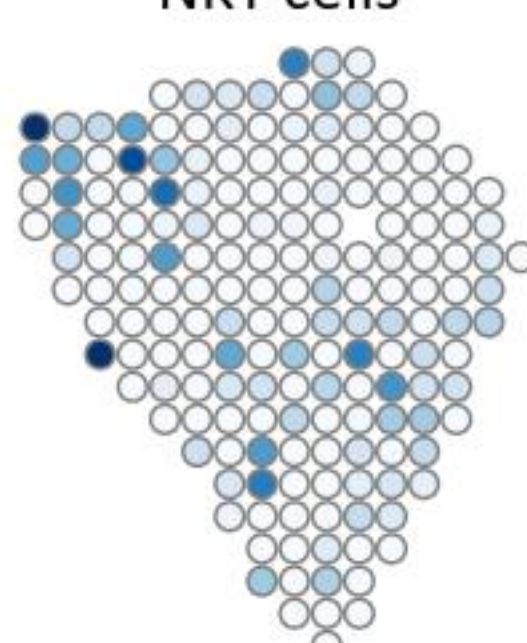



# minor\_D6

B-cells Memory

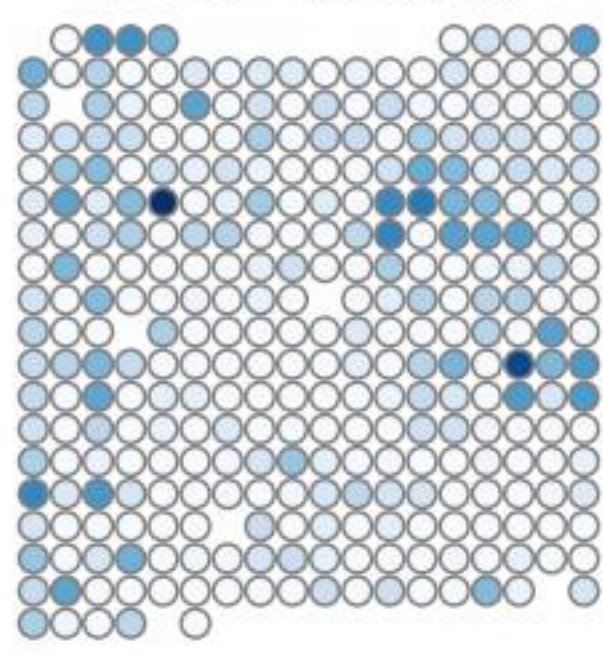

B-cells Naive

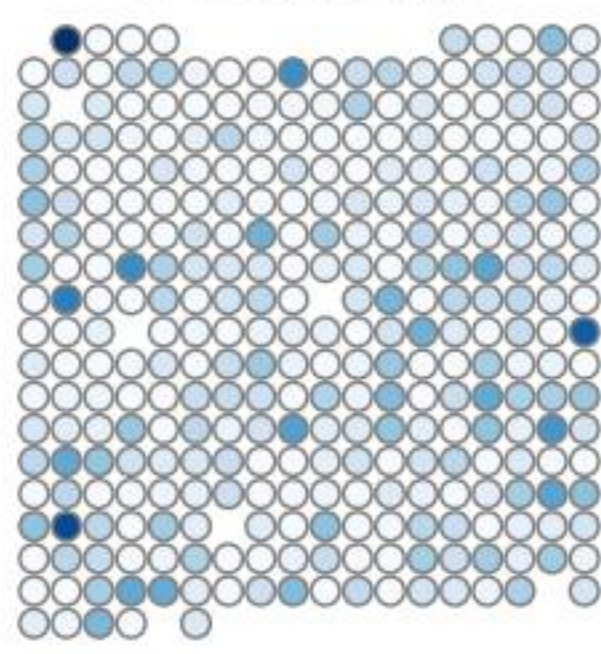

CAFs MSC/iCAF-like

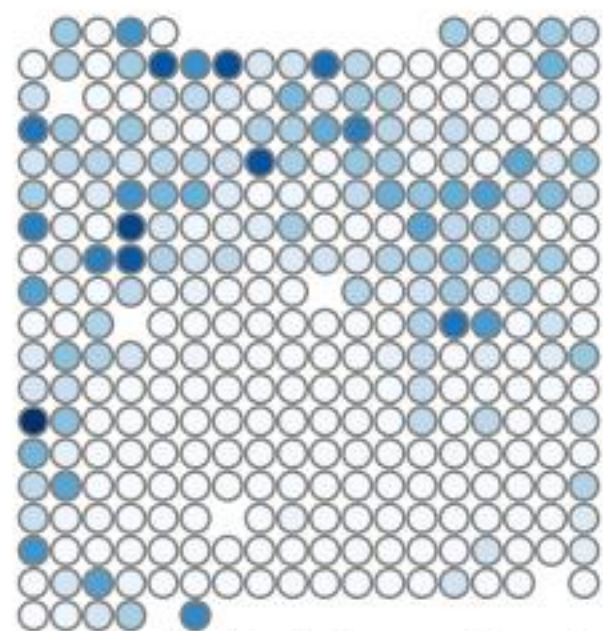

CAFs myCAF-like

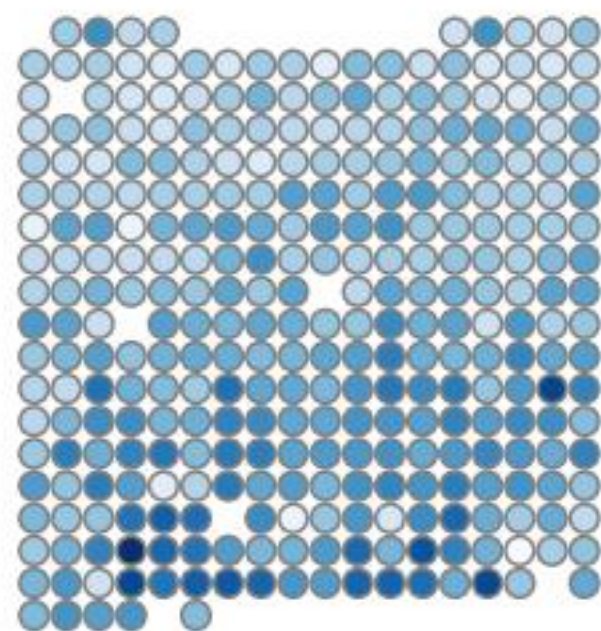

Endothelial Lymphatic  
LYVE1

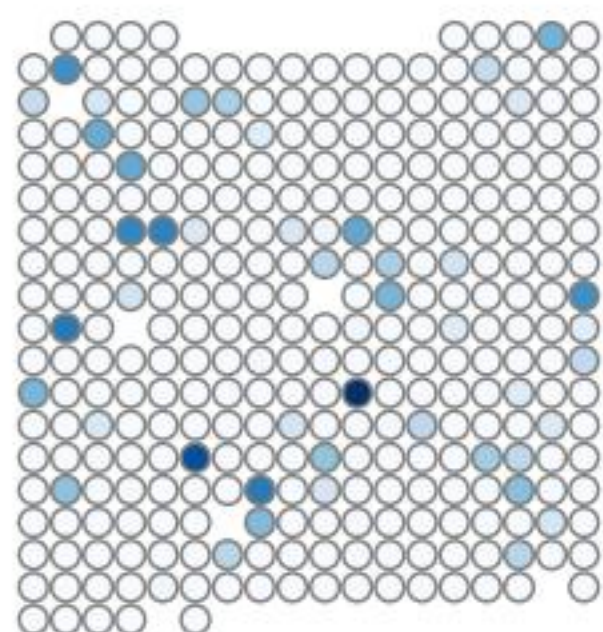

Endothelial RGS5

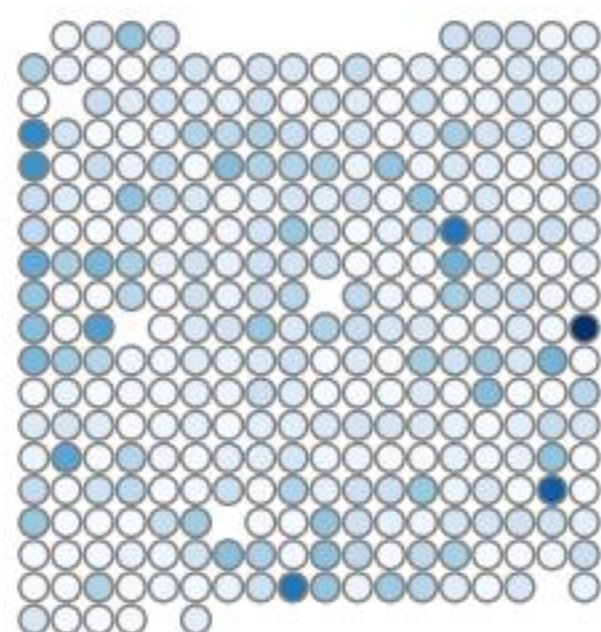

Endothelial CXCL12

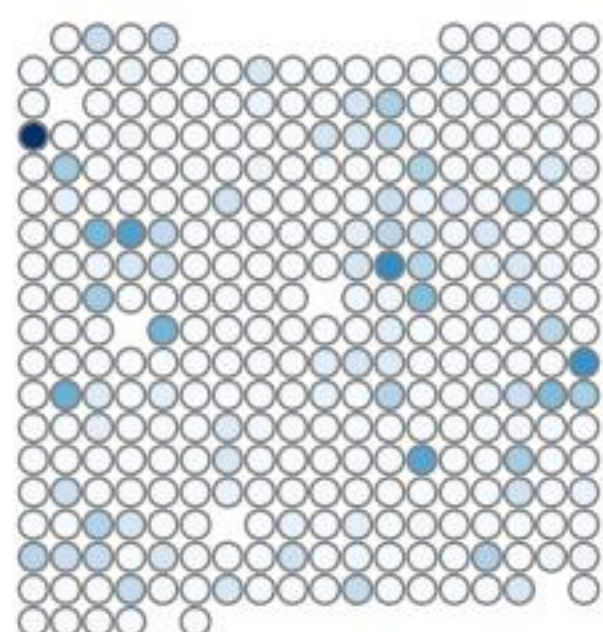

Endothelial ACKR1

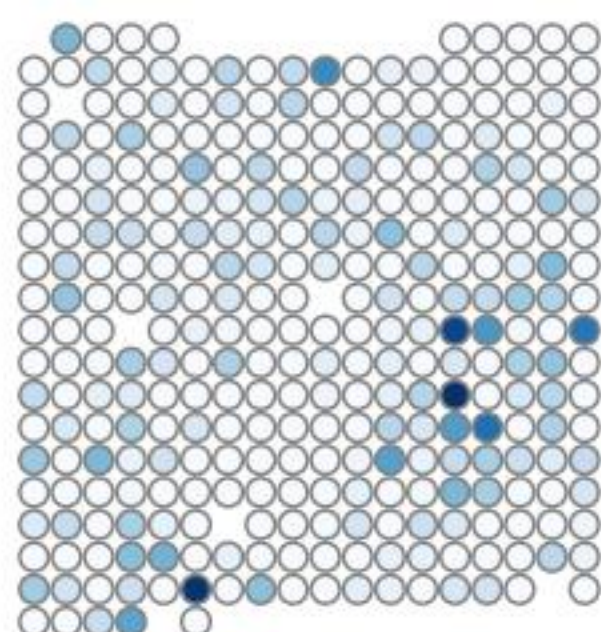

Cancer Epithelial

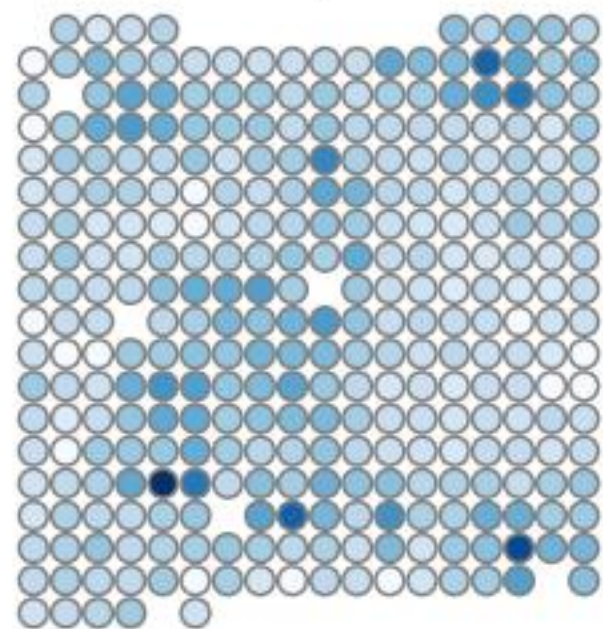

Normal Epithelial

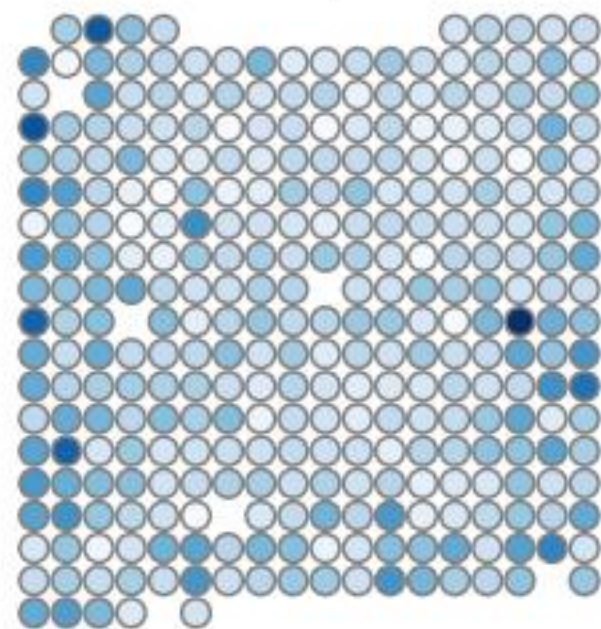

Cycling Myeloid

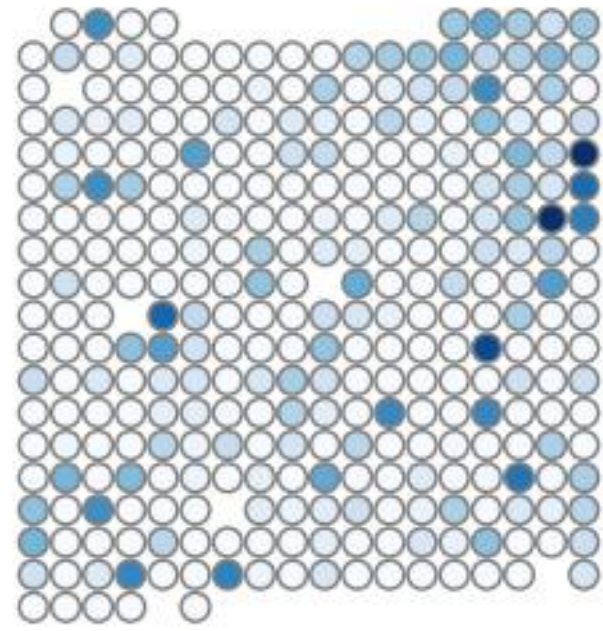

DCs

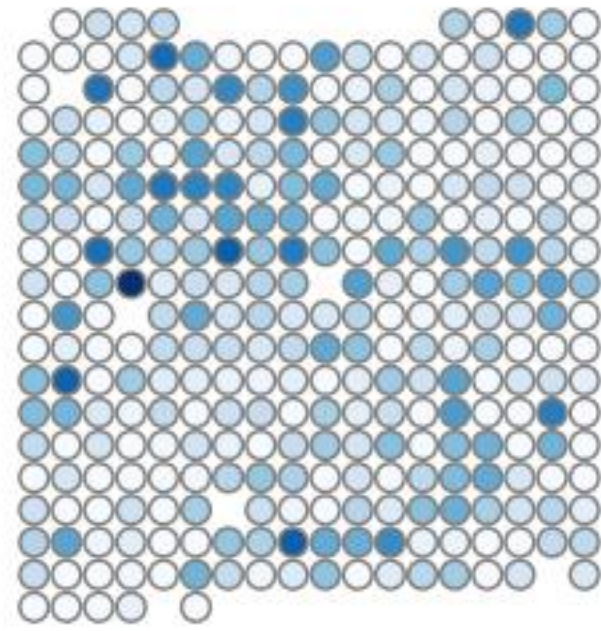

Macrophages

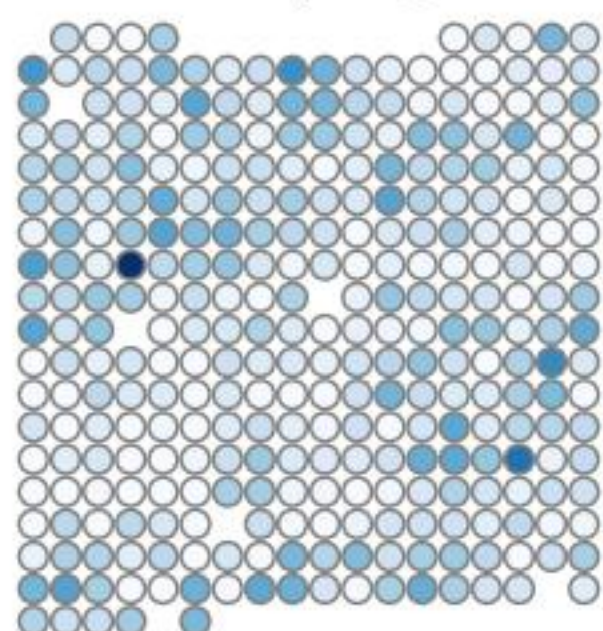

Monocytes

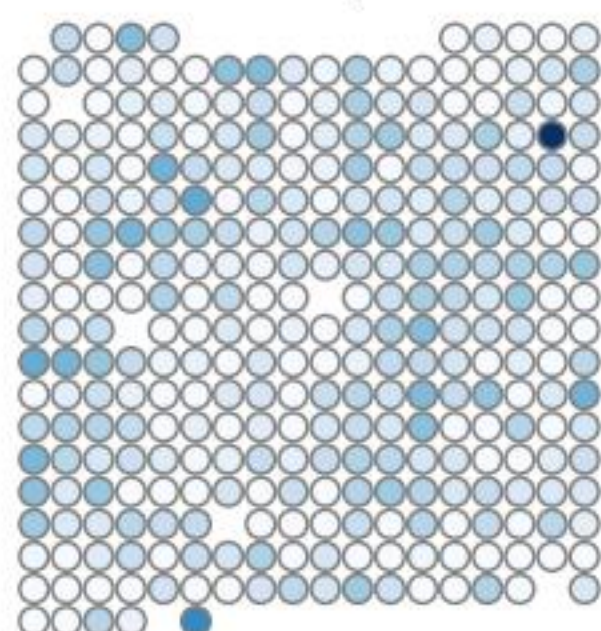

Plasma Cells

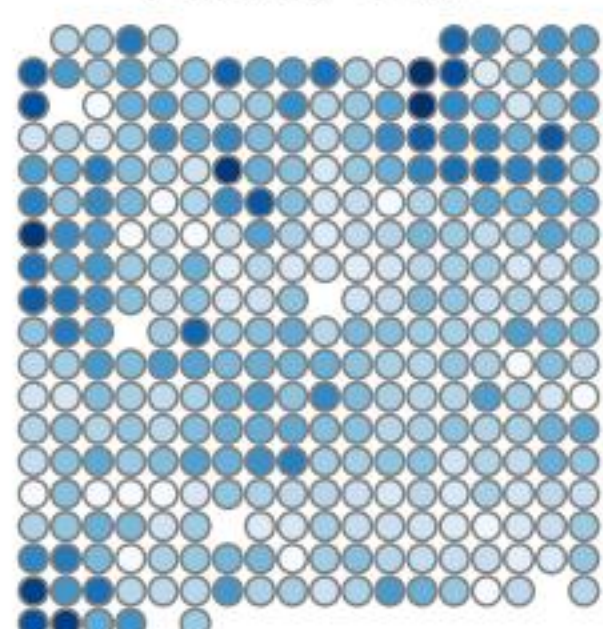

PVL Differentiated

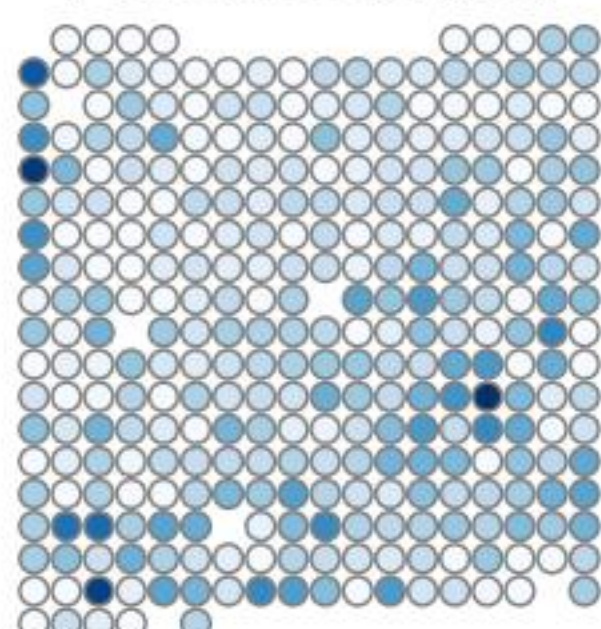

PVL Immature

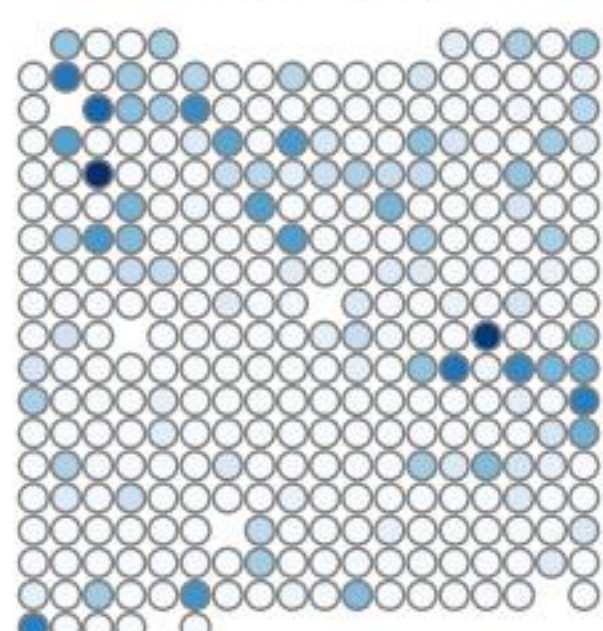

CD4+ T-cells

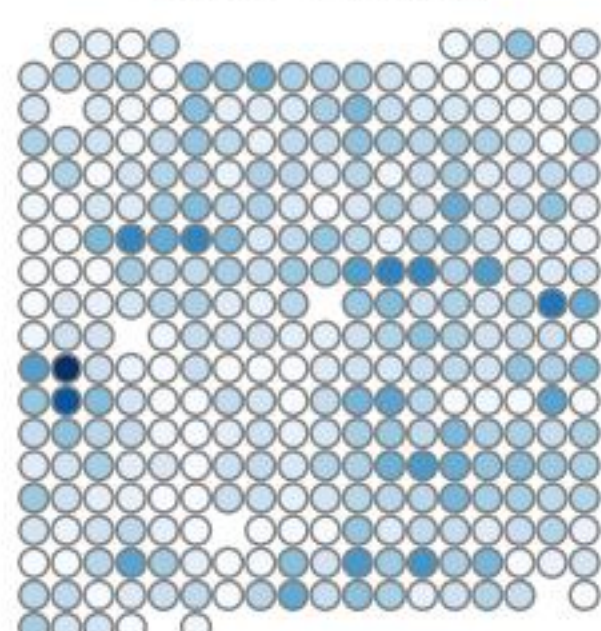

CD8+ T-cells

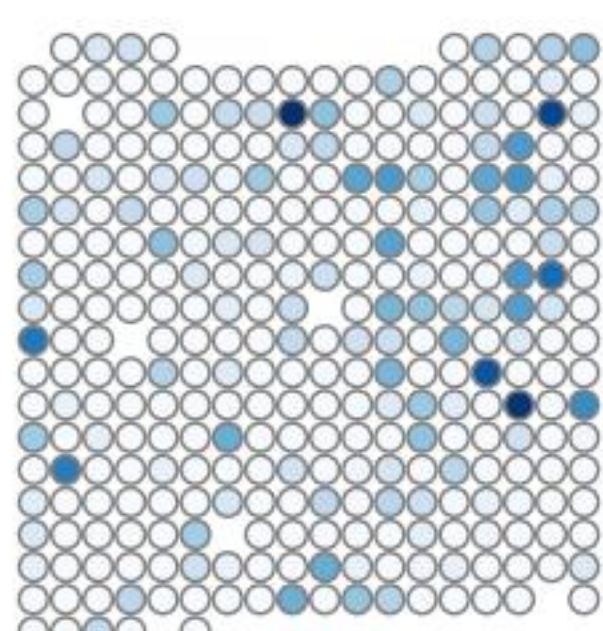

Cycling T-cells

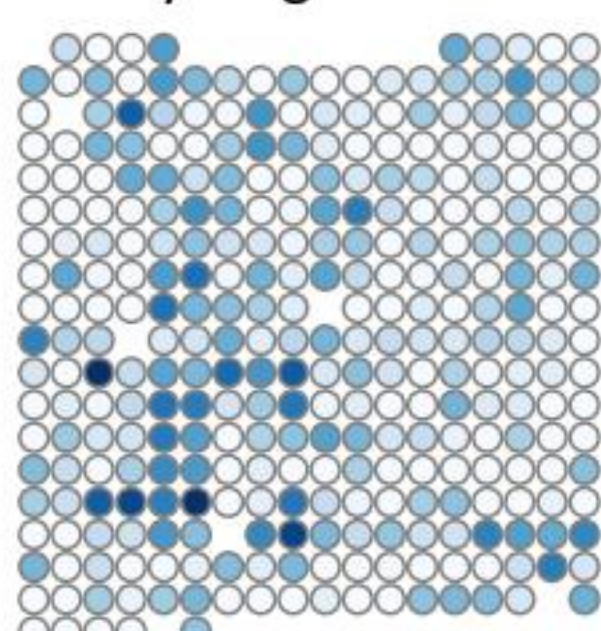

NK cells

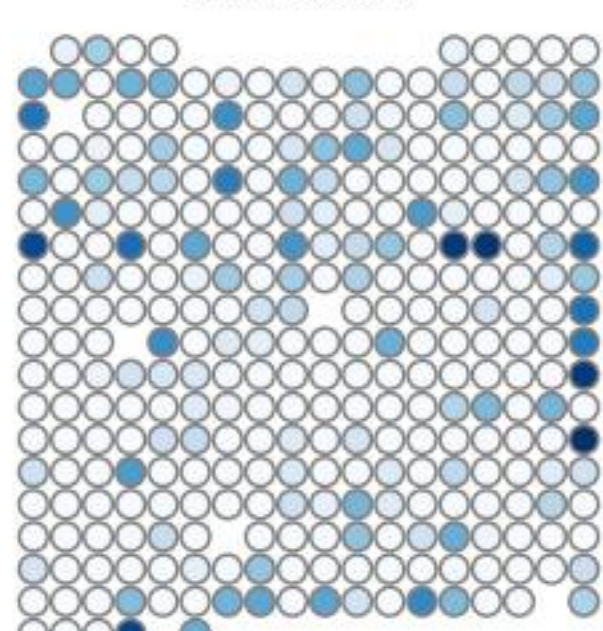

NKT cells

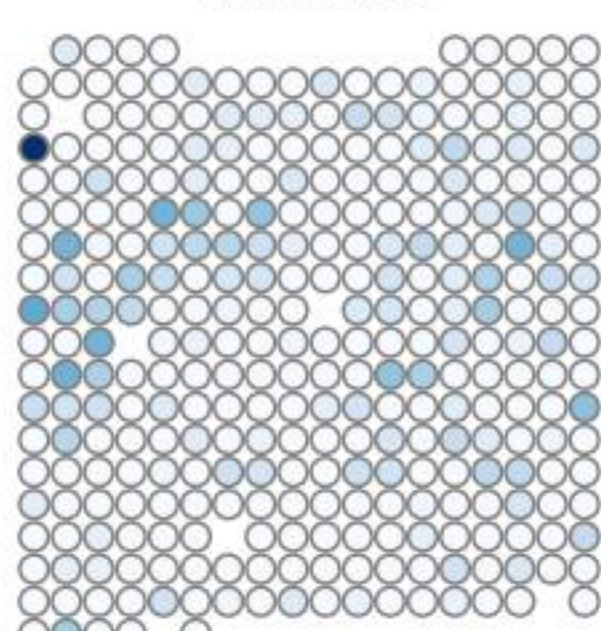

# minor\_A5

B-cells Memory

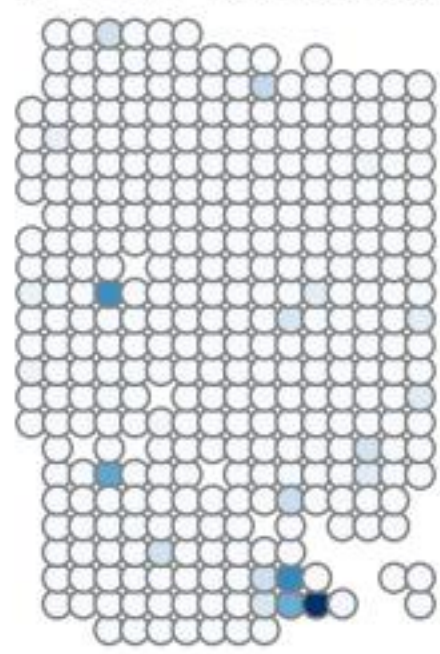

B-cells Naive

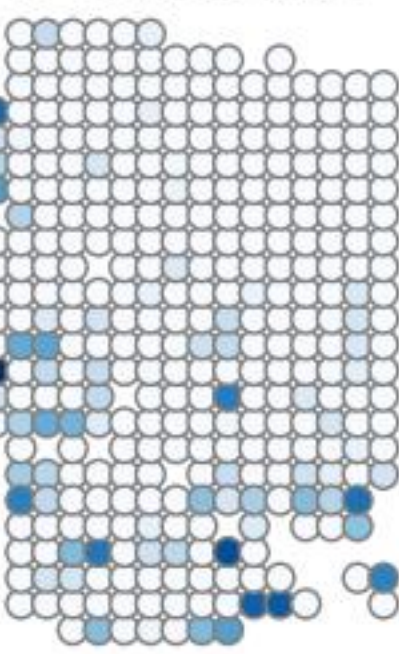

CAFs MSC/iCAF-like

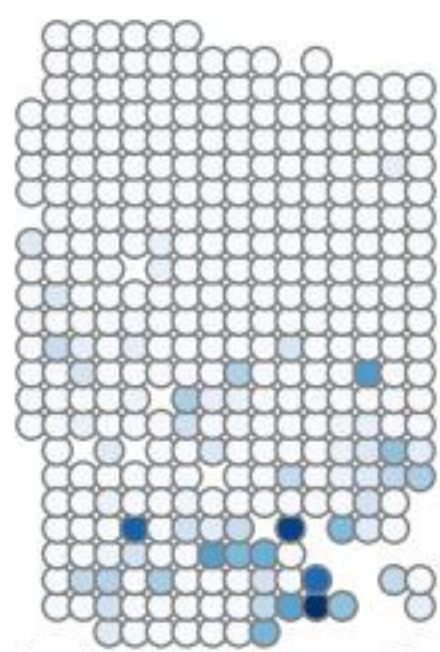

CAFs myCAF-like

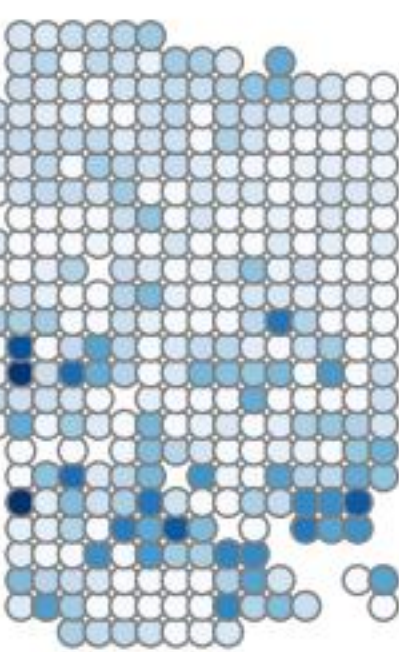

Endothelial Lymphatic  
LYVE1

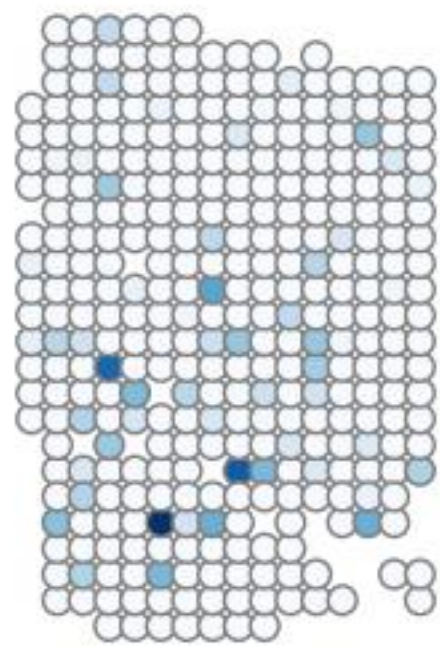

Endothelial RGS5

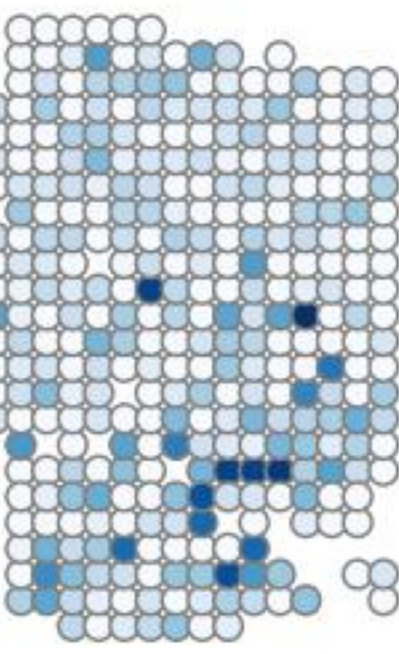

Endothelial CXCL12

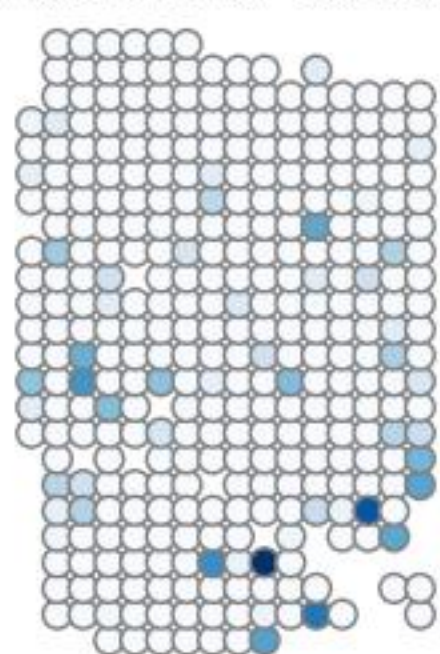

Endothelial ACKR1

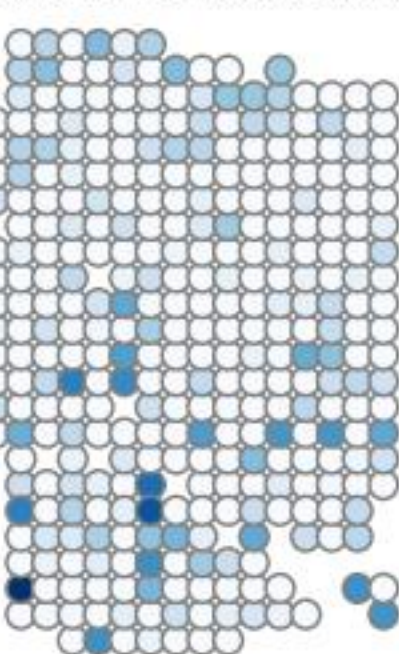

Cancer Epithelial

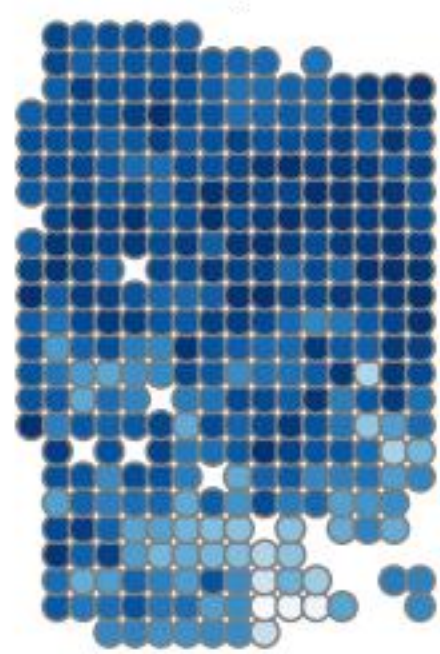

Normal Epithelial

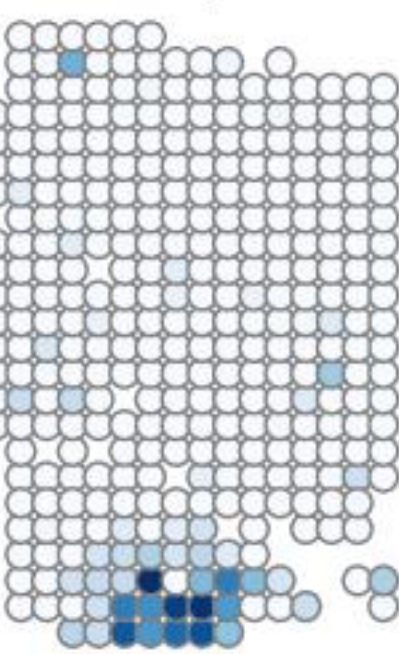

Cycling Myeloid

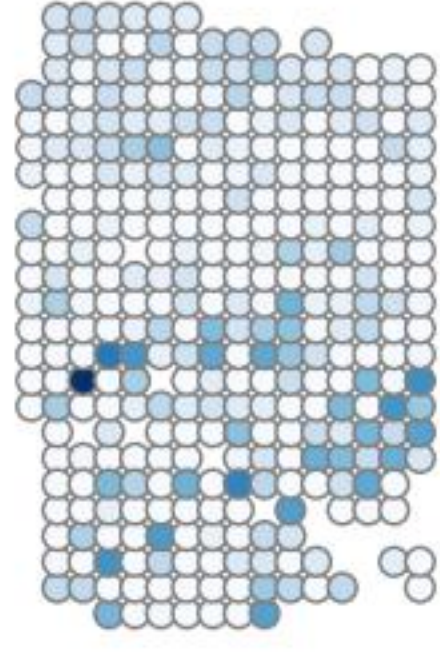

DCs

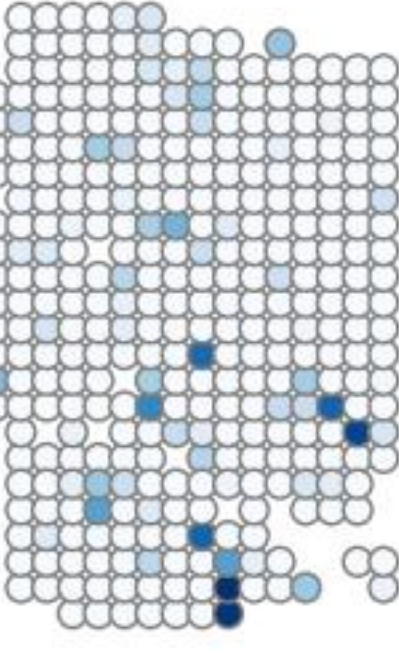

Macrophages

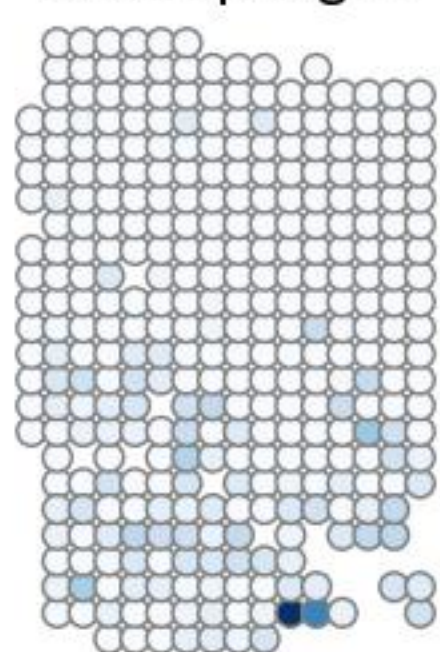

Monocytes

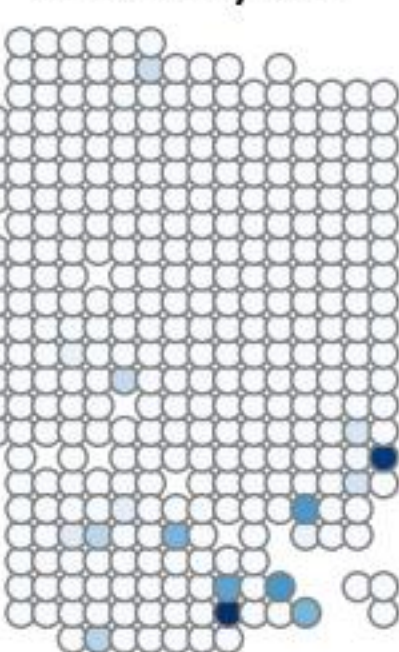

Plasma Cells

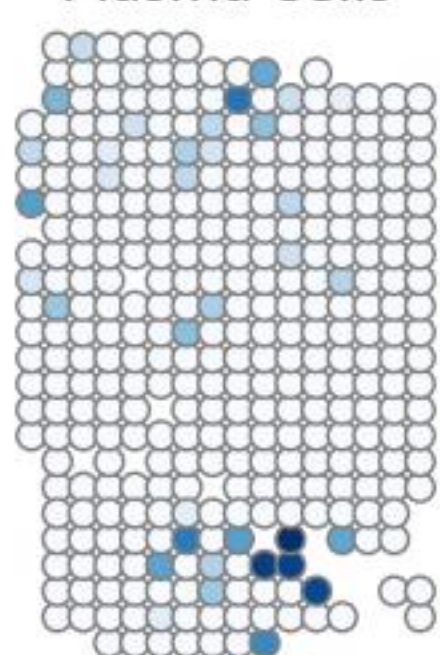

PVL Differentiated

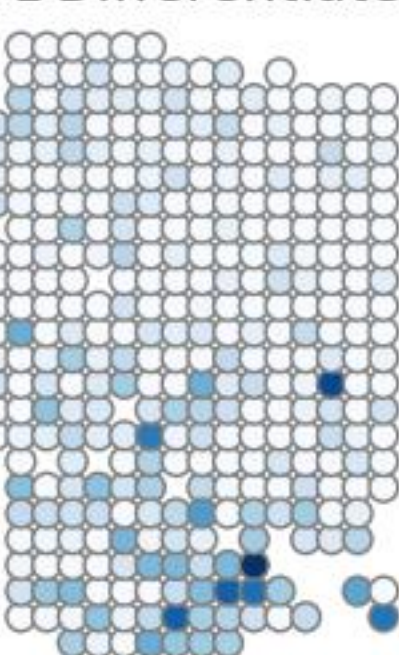

PVL Immature

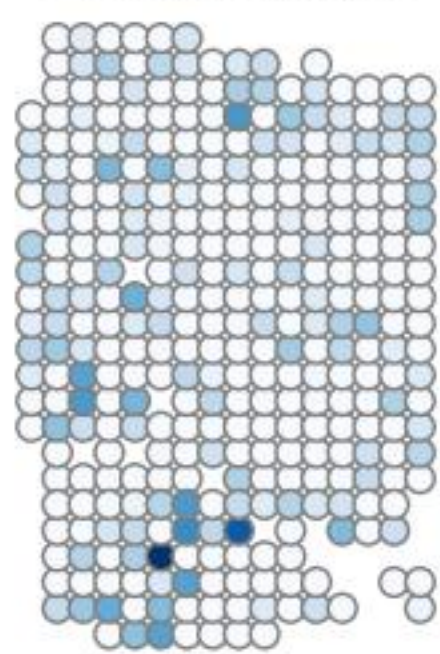

CD4+ T-cells

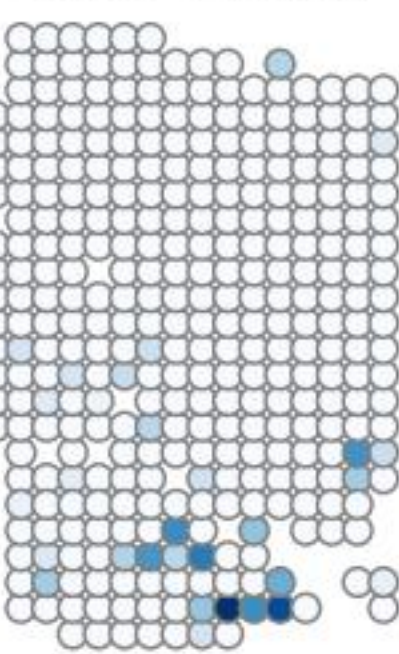

CD8+ T-cells

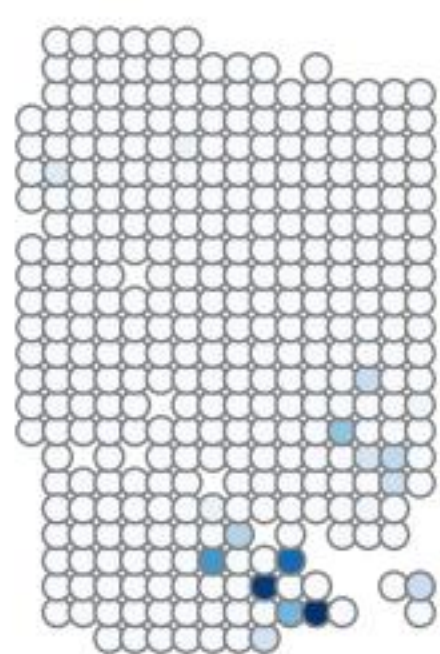

Cycling T-cells

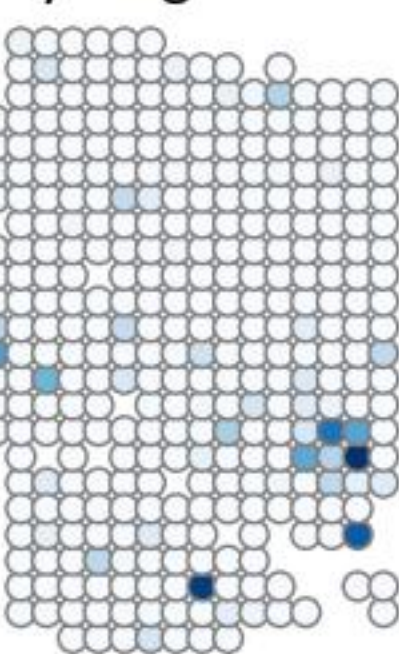

NK cells

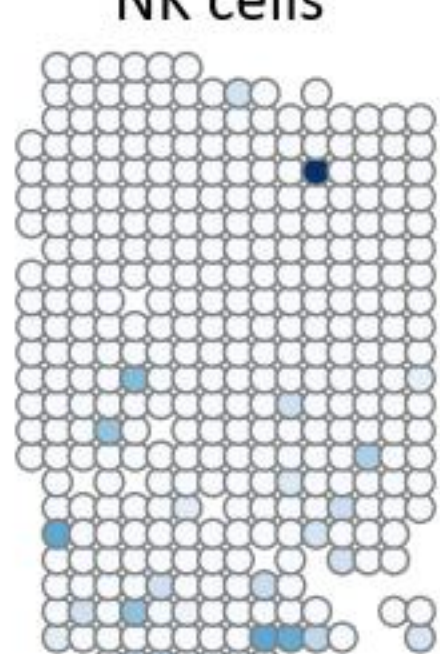

NKT cells

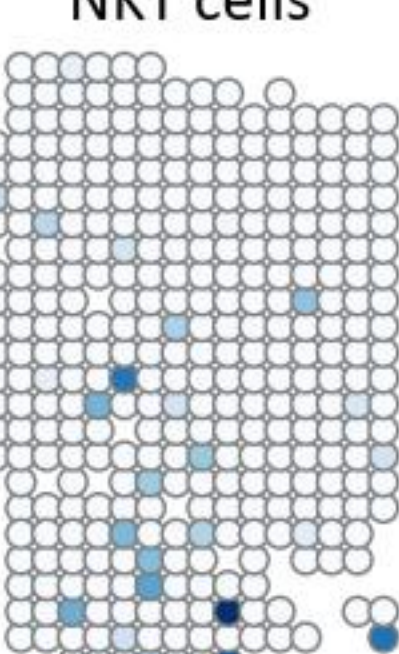

# minor\_H2

B-cells Memory

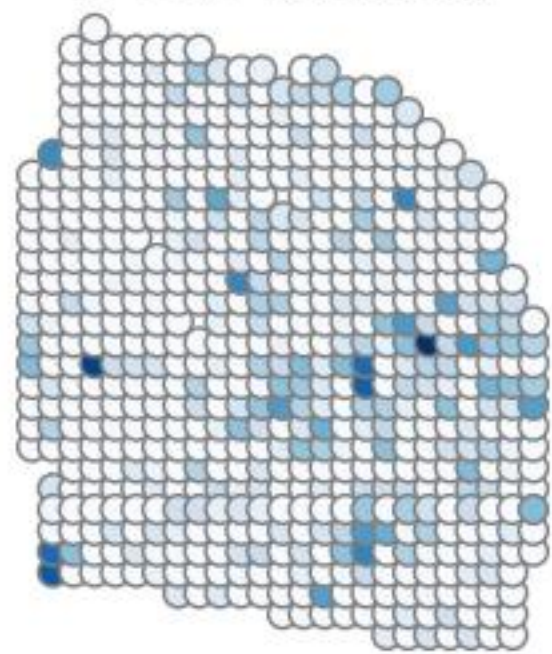

B-cells Naive

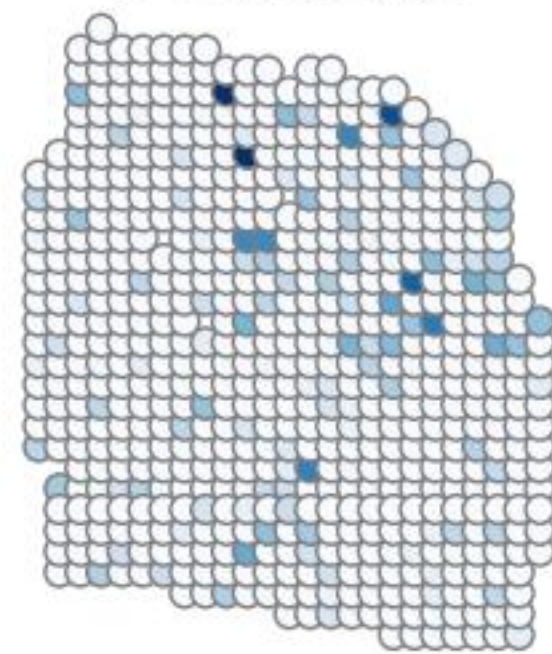

CAFs MSC/iCAF-like

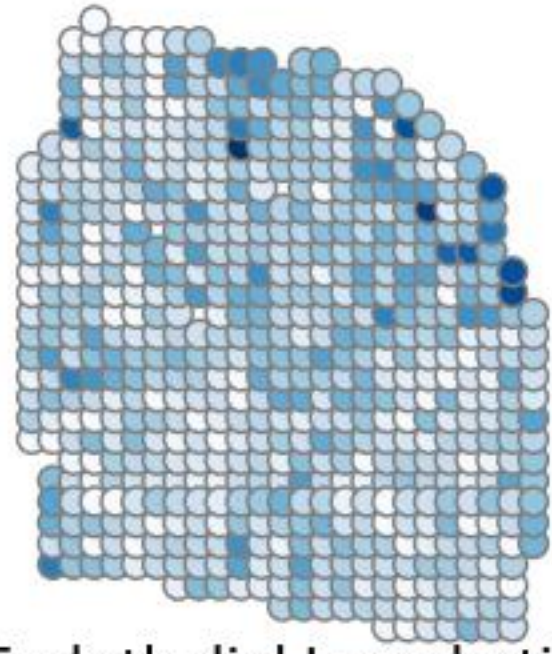

CAFs myCAF-like

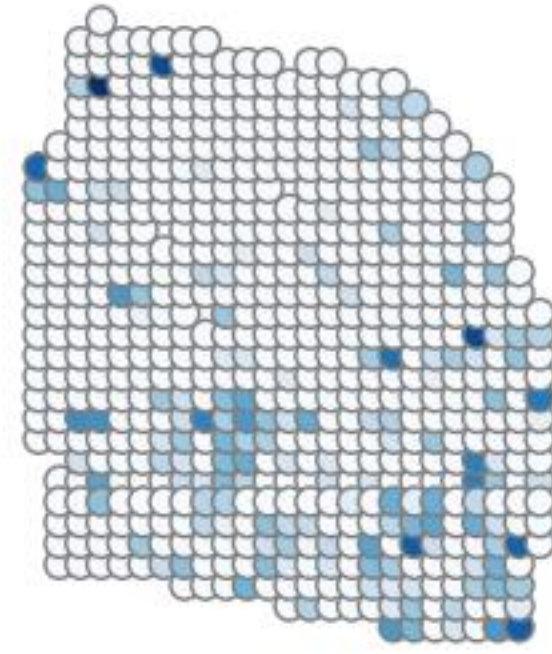

Endothelial Lymphatic  
LYVE1

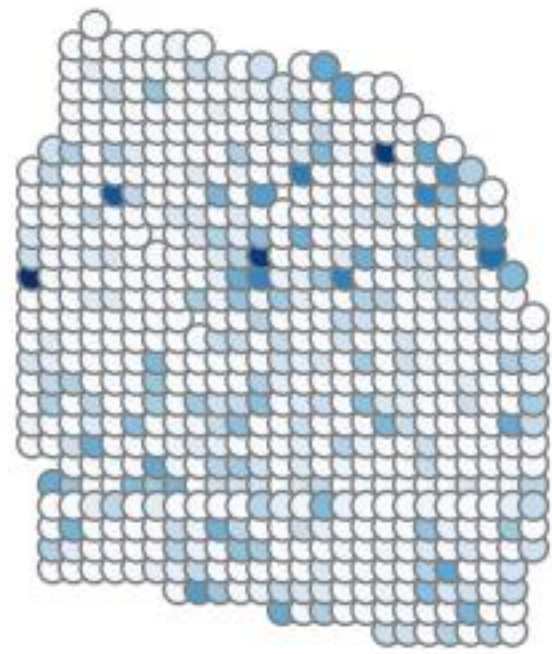

Endothelial RGS5

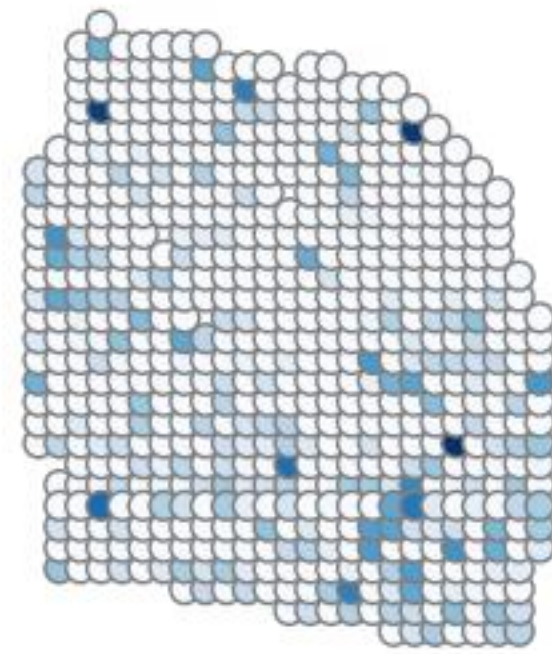

Endothelial CXCL12

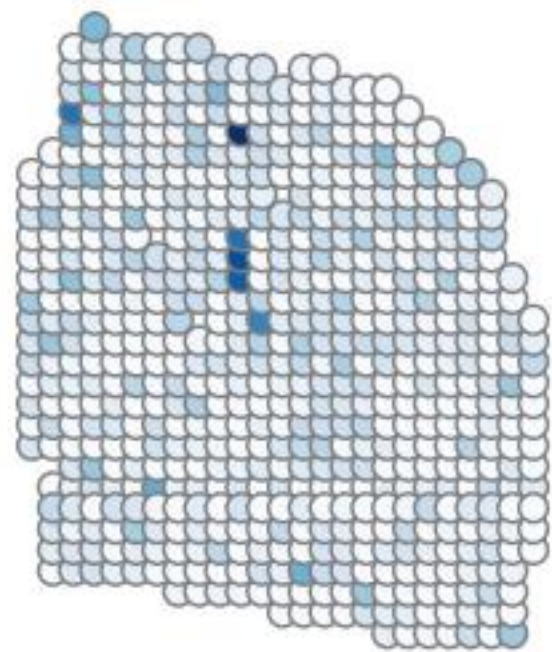

Endothelial ACKR1

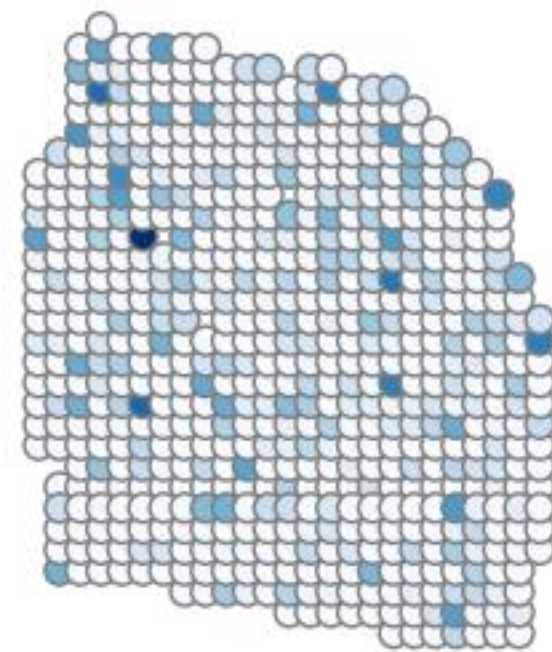

Cancer Epithelial

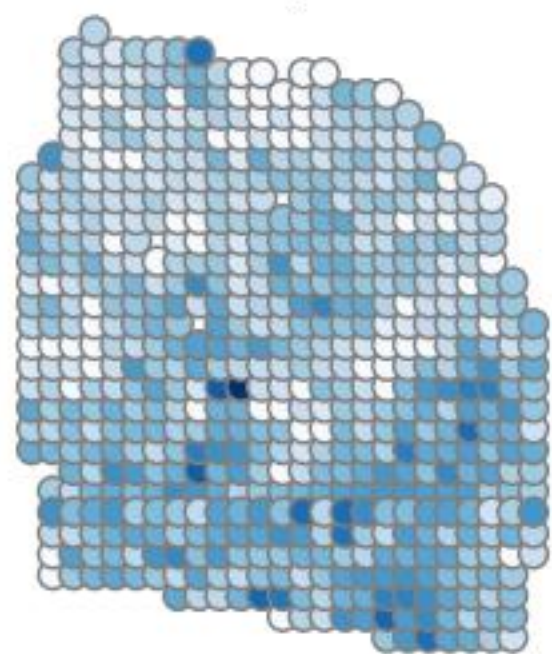

Normal Epithelial

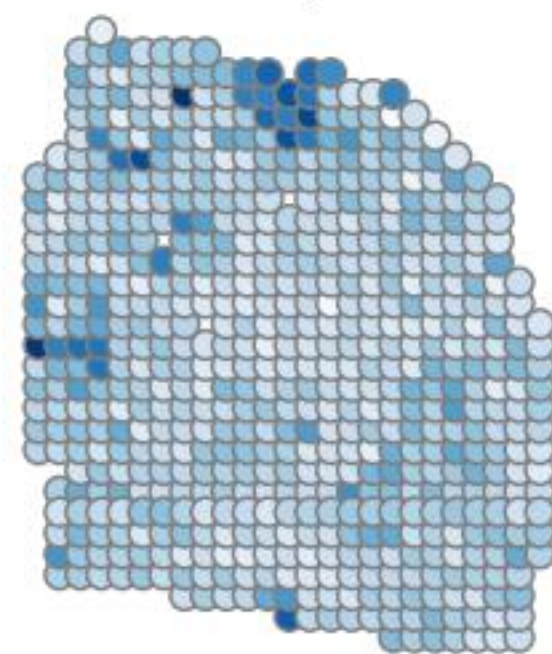

Cycling Myeloid

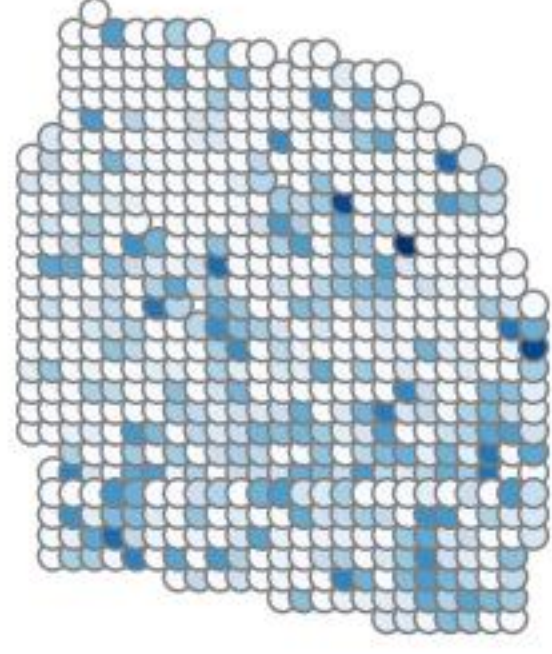

DCs

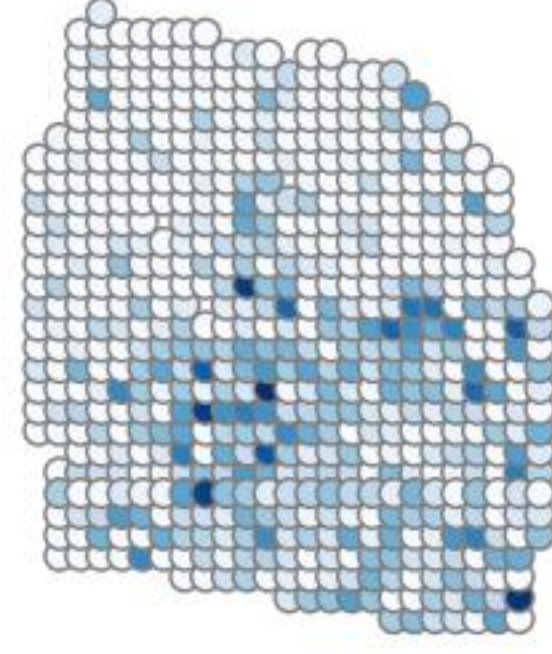

Macrophages

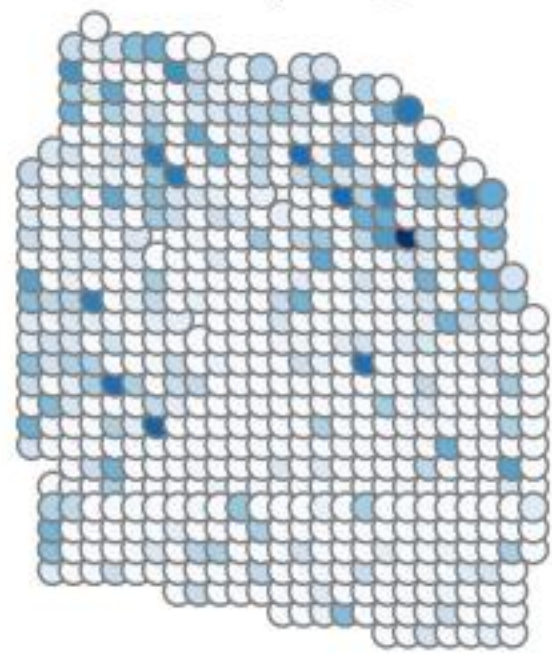

Monocytes

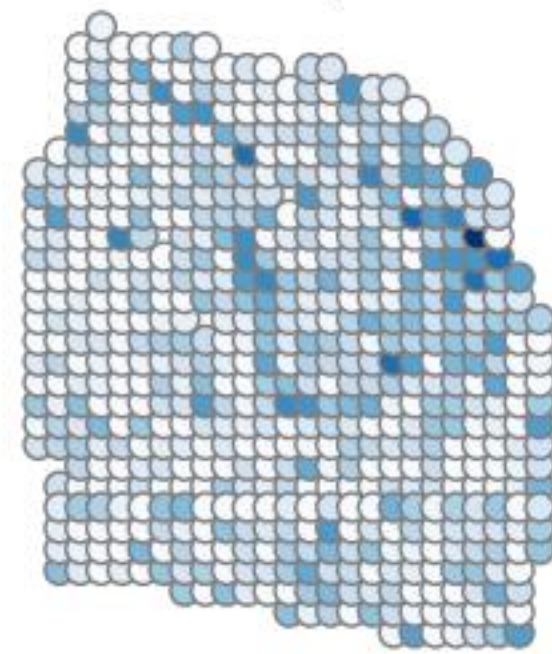

Plasma Cells

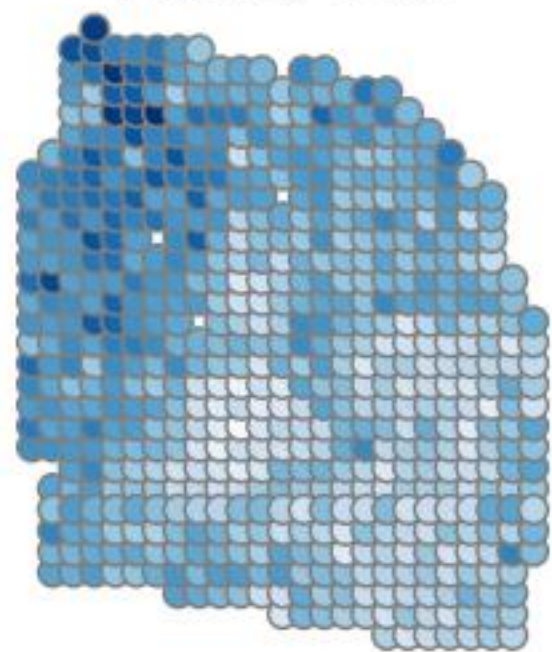

PVL Differentiated

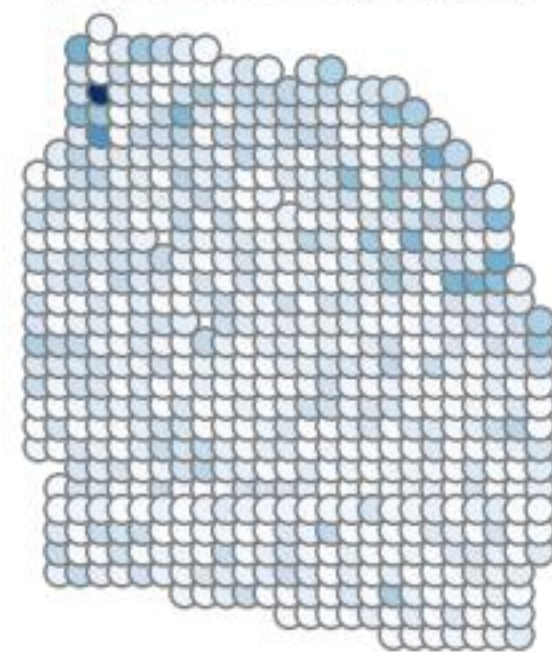

PVL Immature

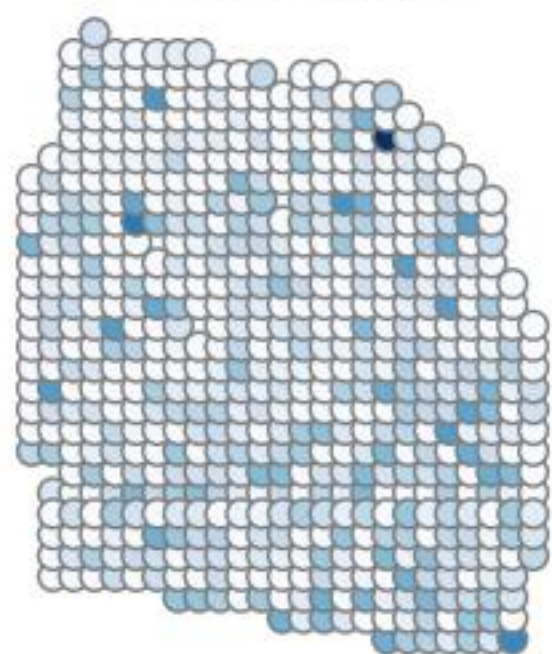

CD4+ T-cells

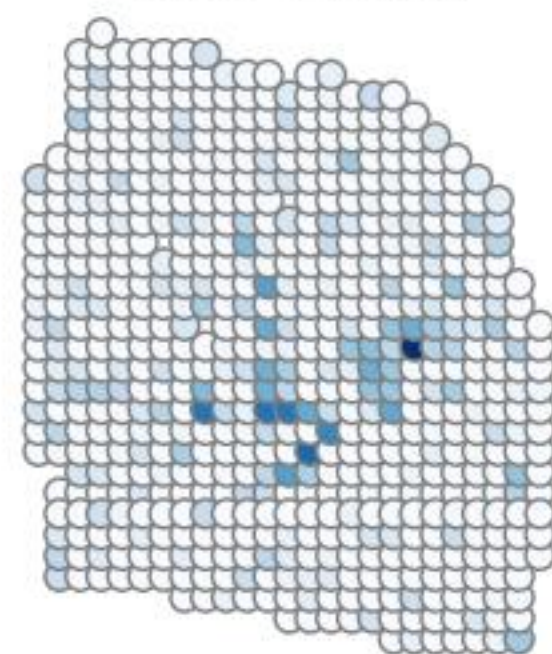

CD8+ T-cells

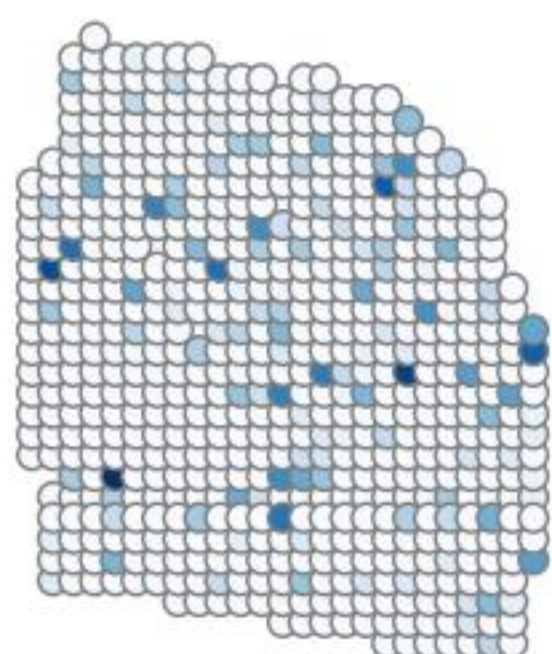

Cycling T-cells

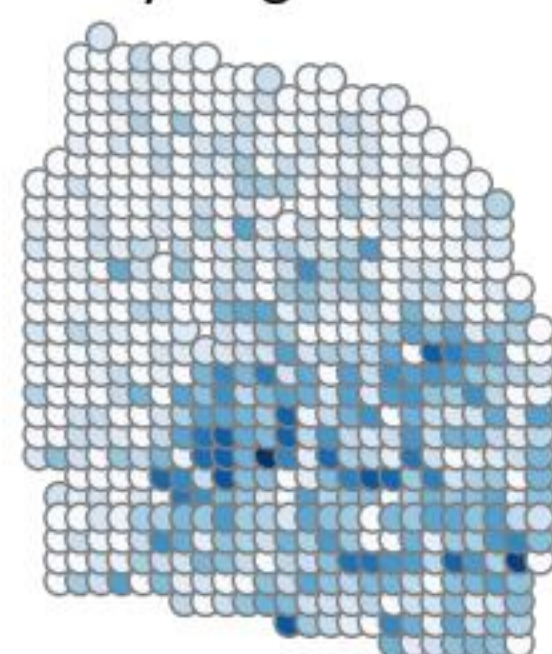

NK cells

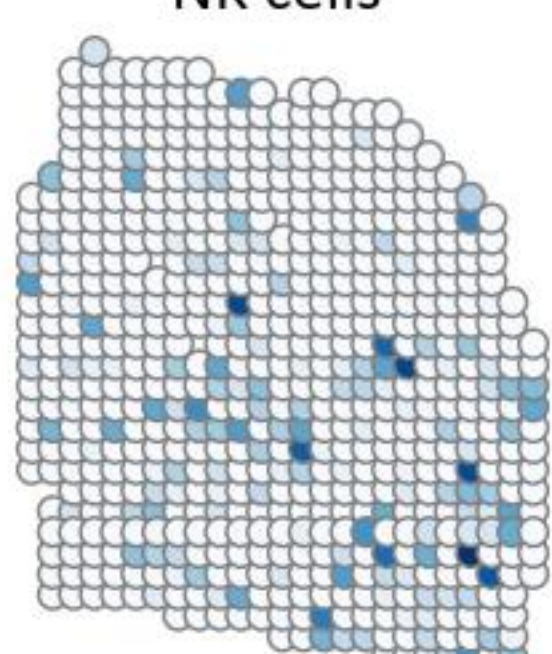

NKT cells

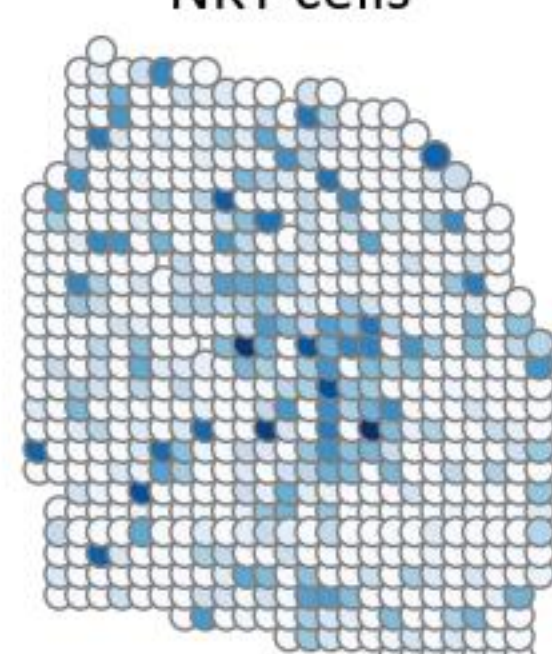

# minor\_D2

B-cells Memory

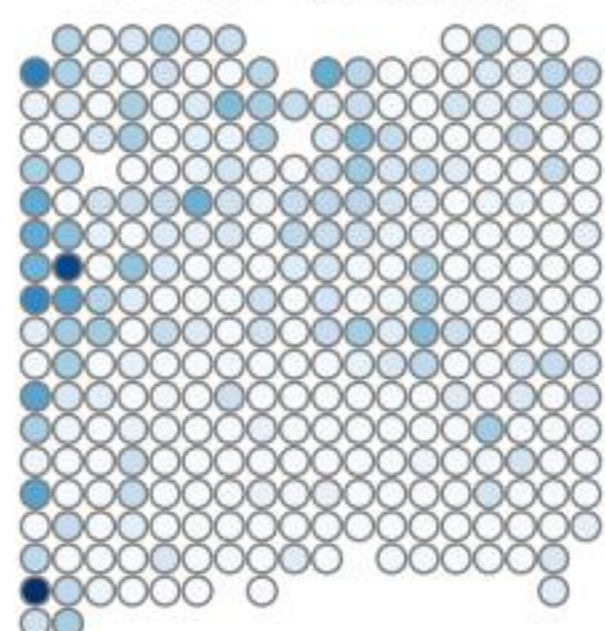

B-cells Naive

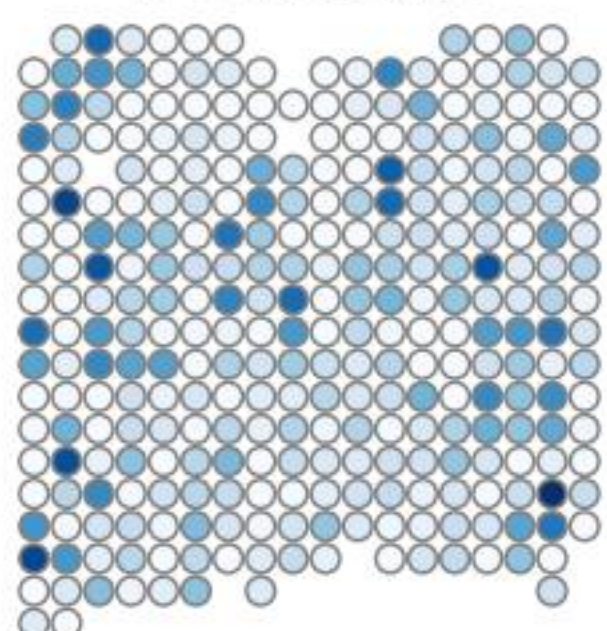

CAFs MSC/iCAF-like

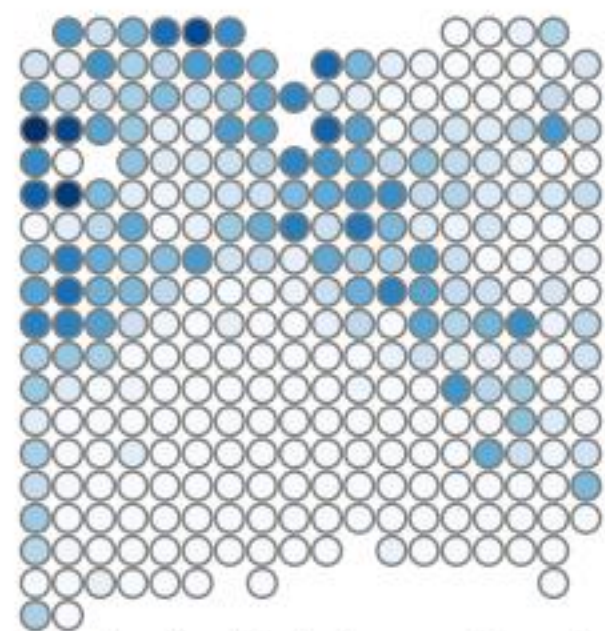

CAFs myCAF-like

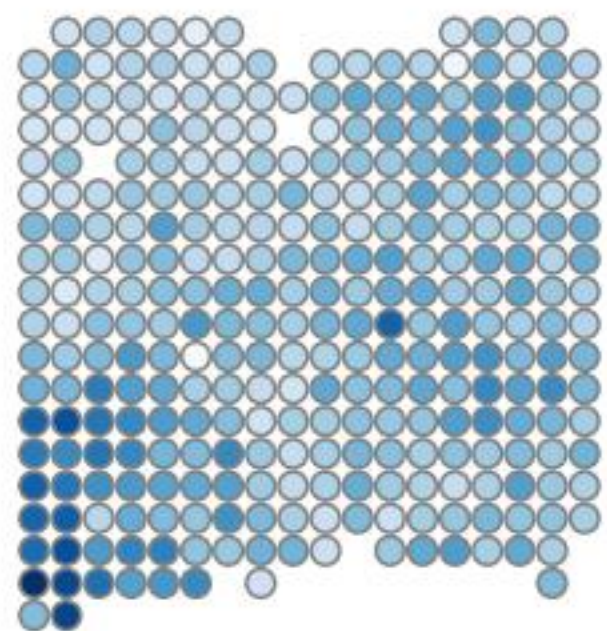

Endothelial Lymphatic LYVE1

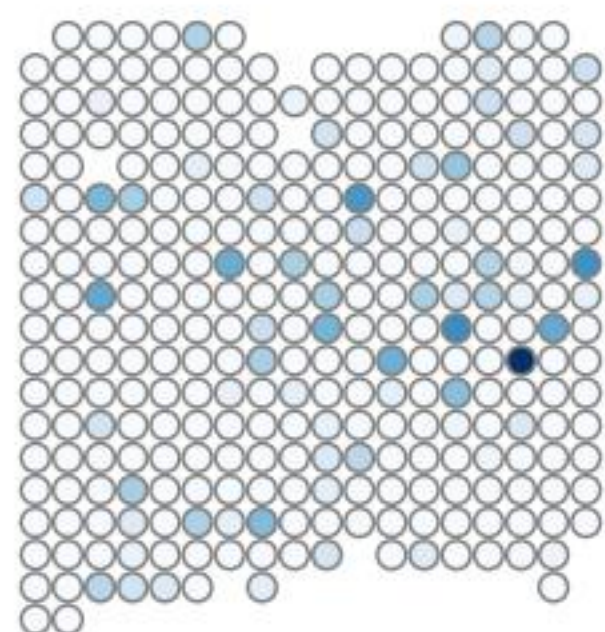

Endothelial RGS5

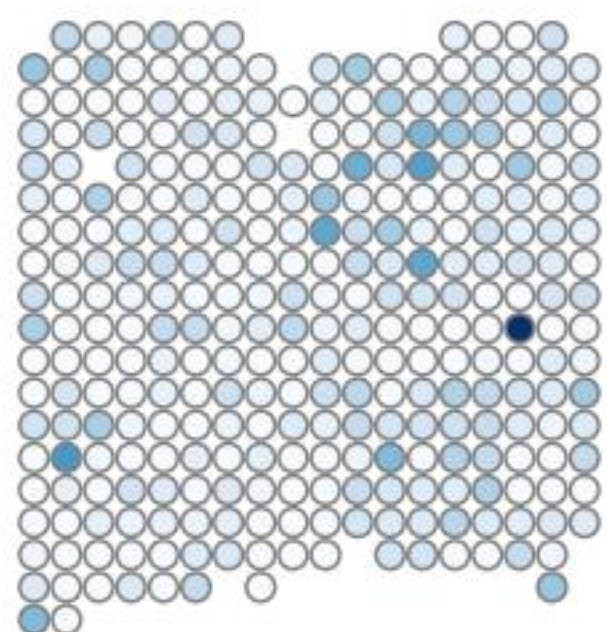

Endothelial CXCL12

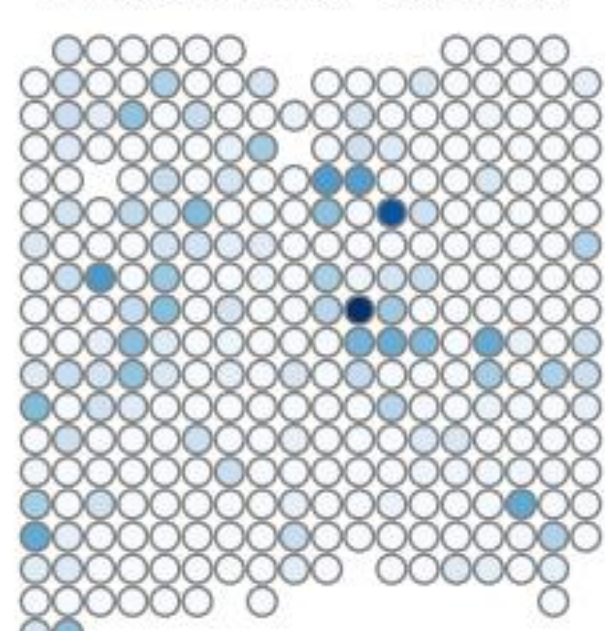

Endothelial ACKR1

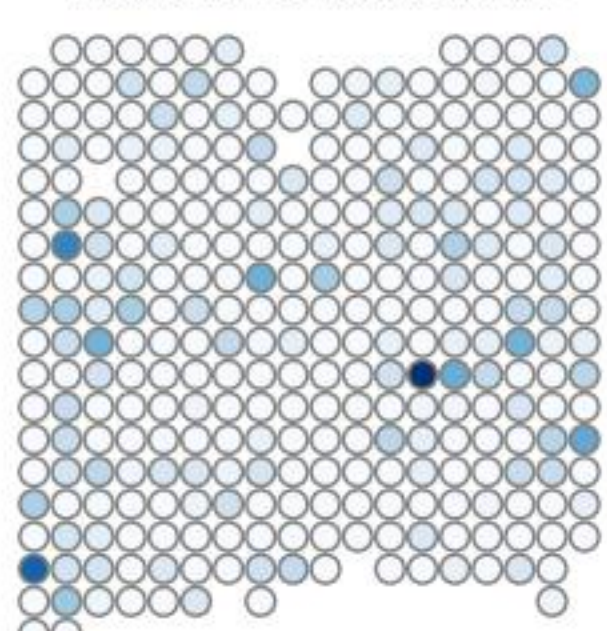

Cancer Epithelial

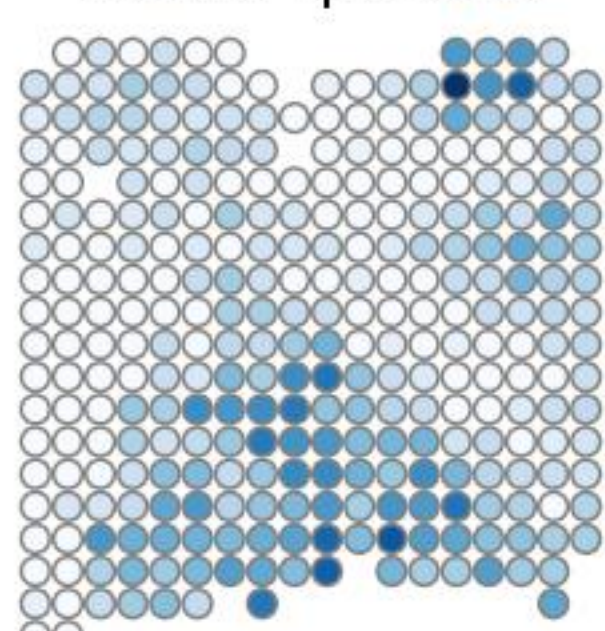

Normal Epithelial

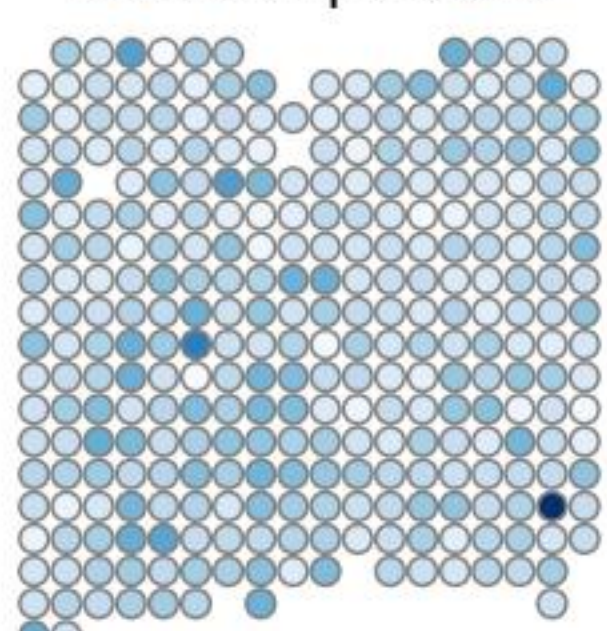

Cycling Myeloid

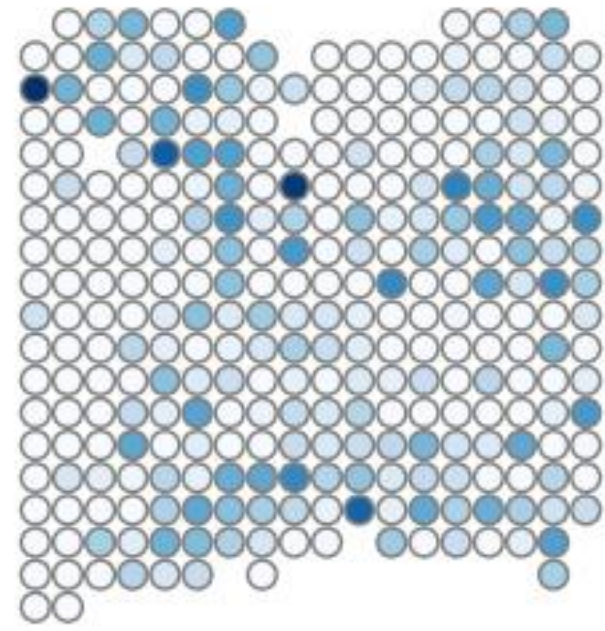

DCs

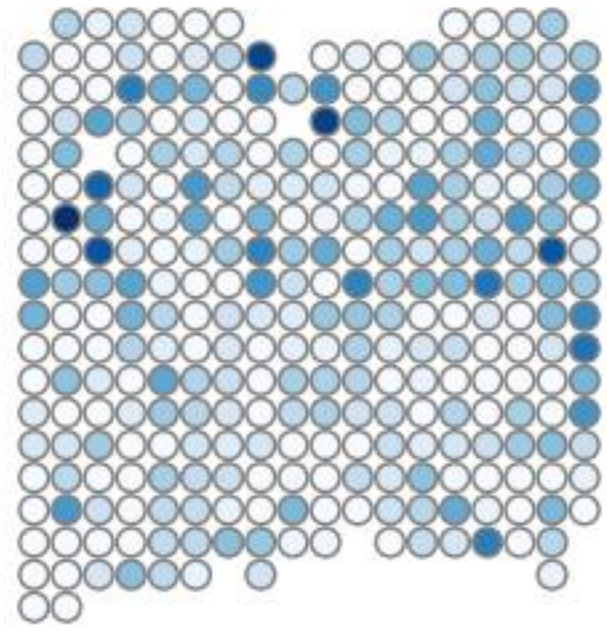

Macrophages

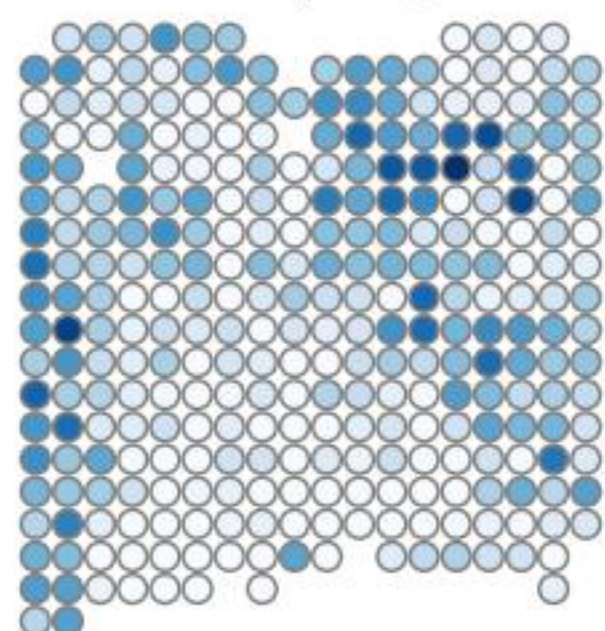

Monocytes

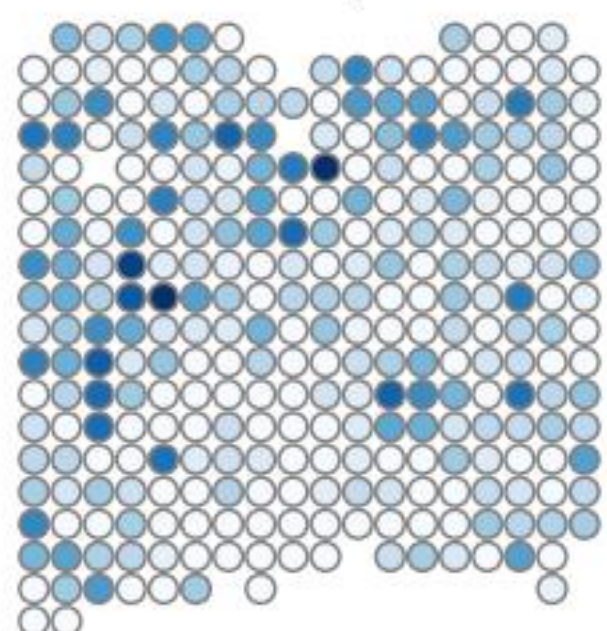

Plasma Cells

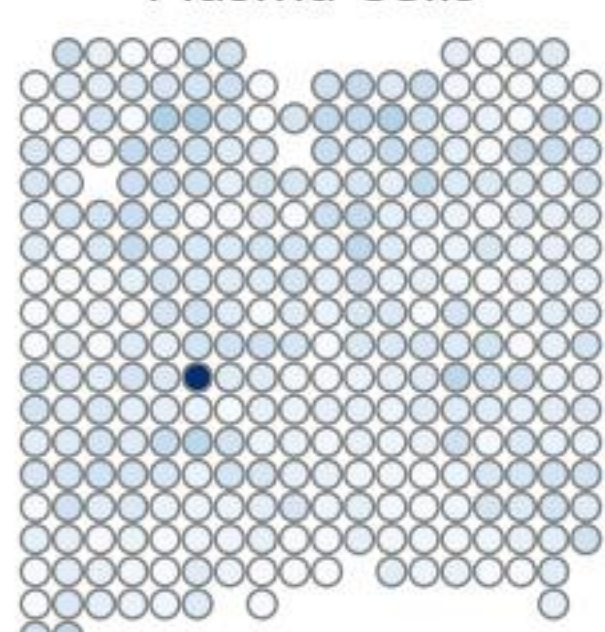

PVL Differentiated

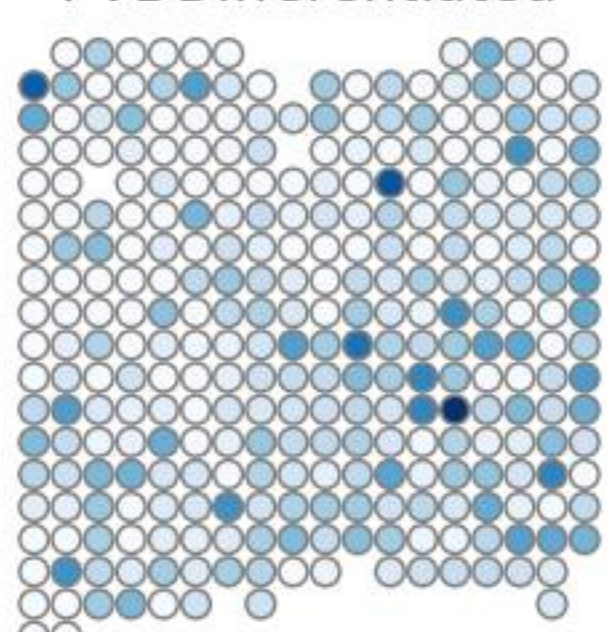

PVL Immature

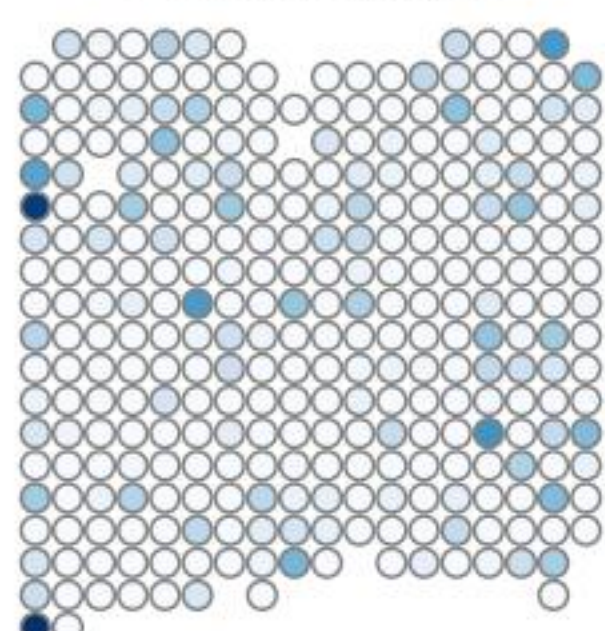

CD4+ T-cells

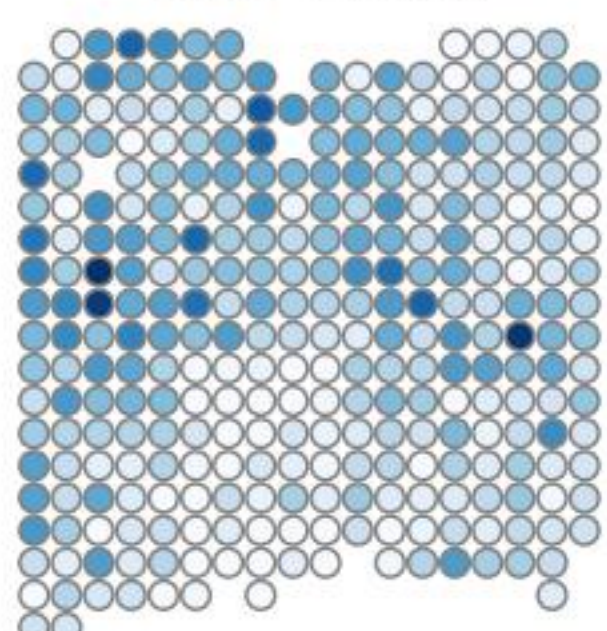

CD8+ T-cells

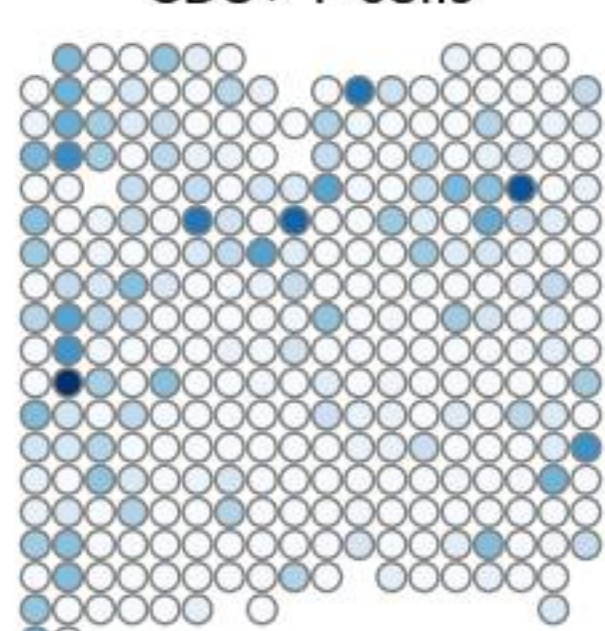

Cycling T-cells

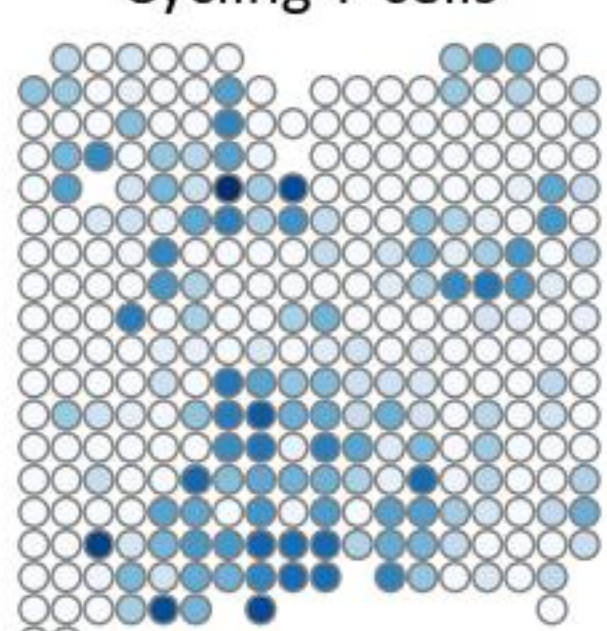

NK cells

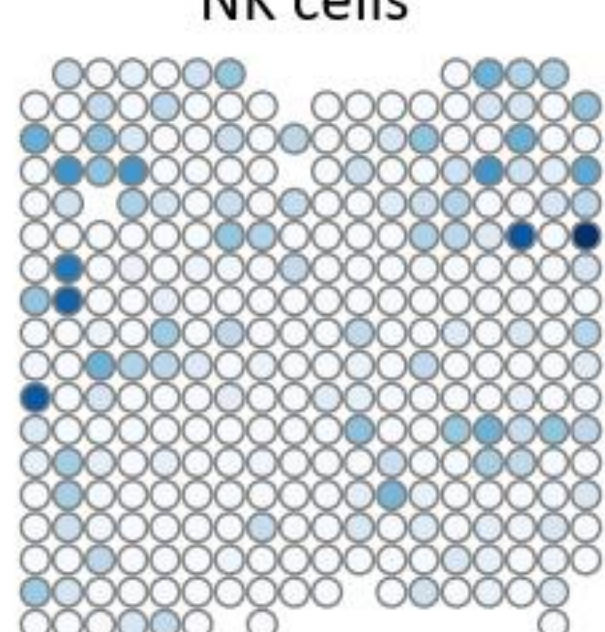

NKT cells

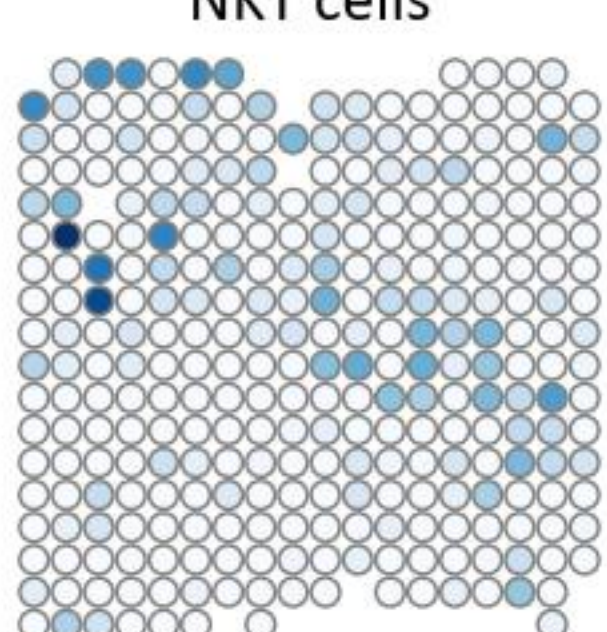

# minor\_H1

B-cells Memory

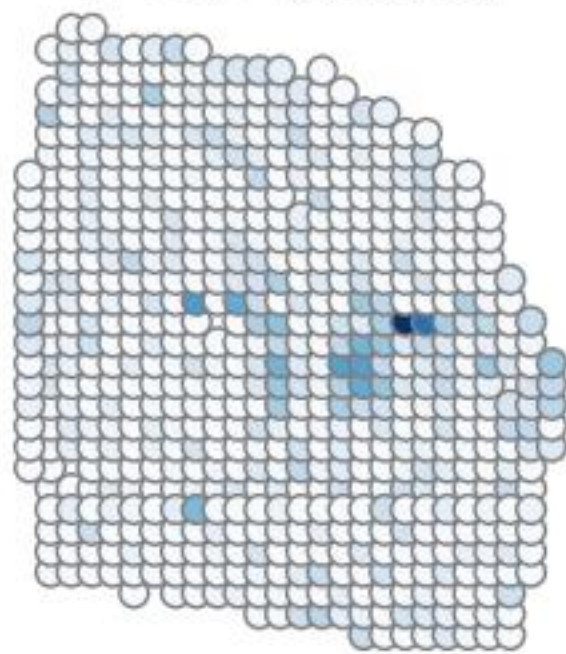

B-cells Naive

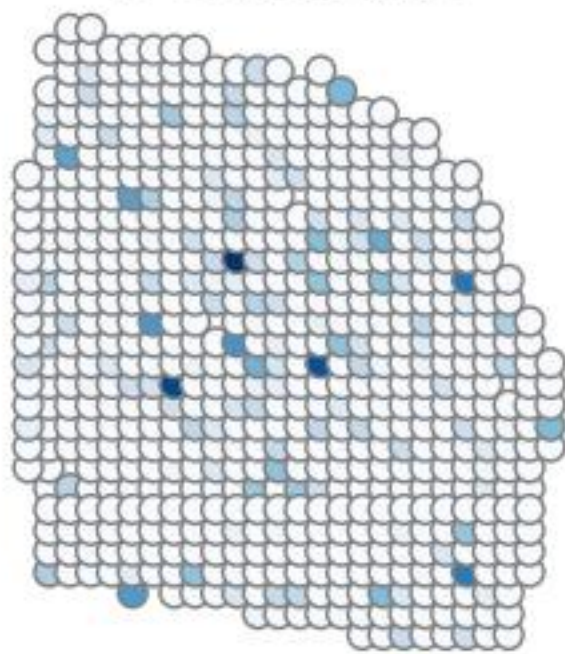

CAFs MSC/iCAF-like

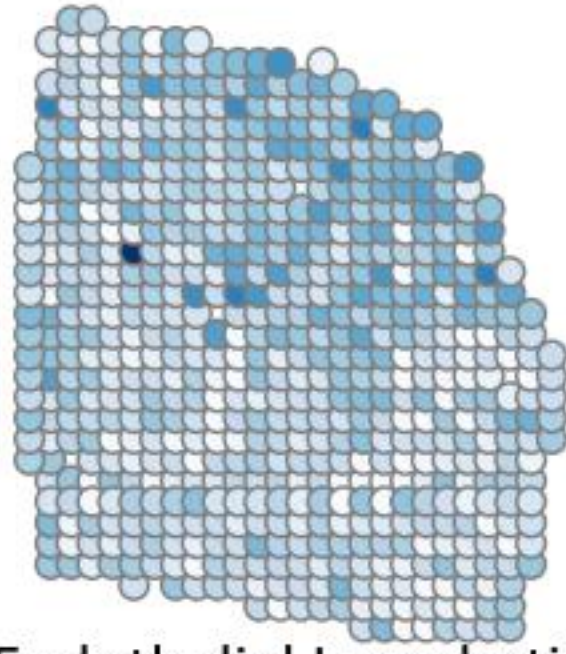

CAFs myCAF-like

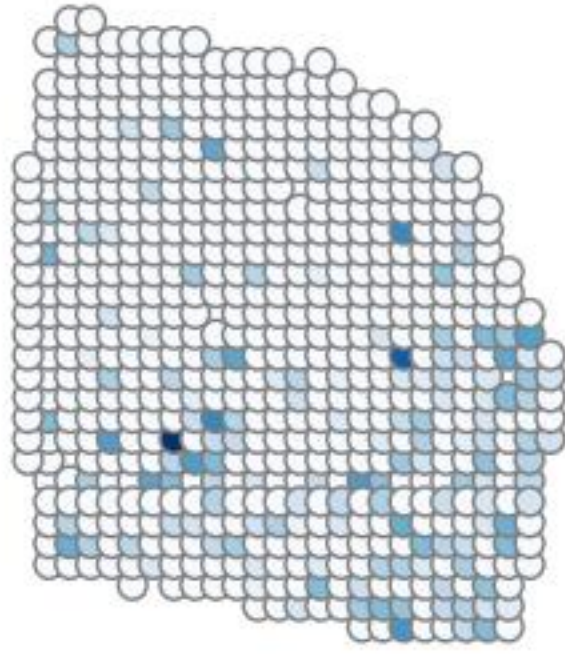

Endothelial Lymphatic  
LYVE1

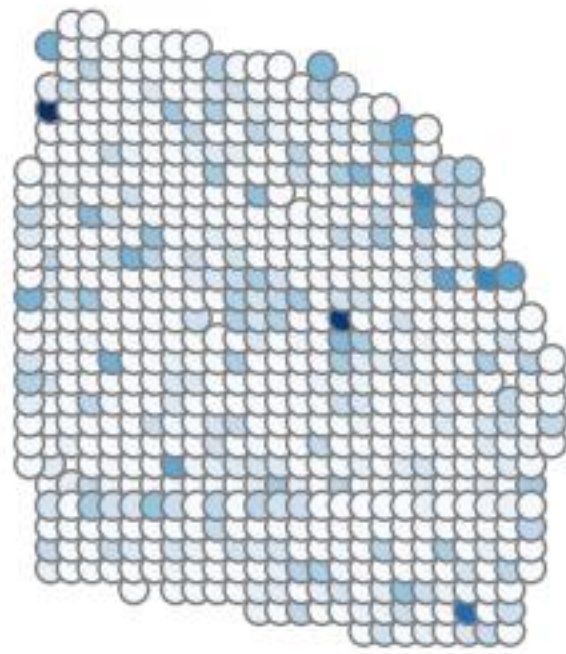

Endothelial RGS5

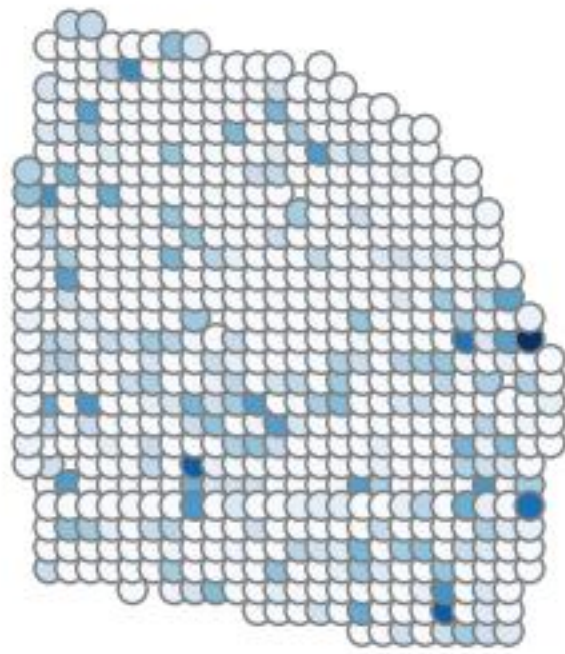

Endothelial CXCL12

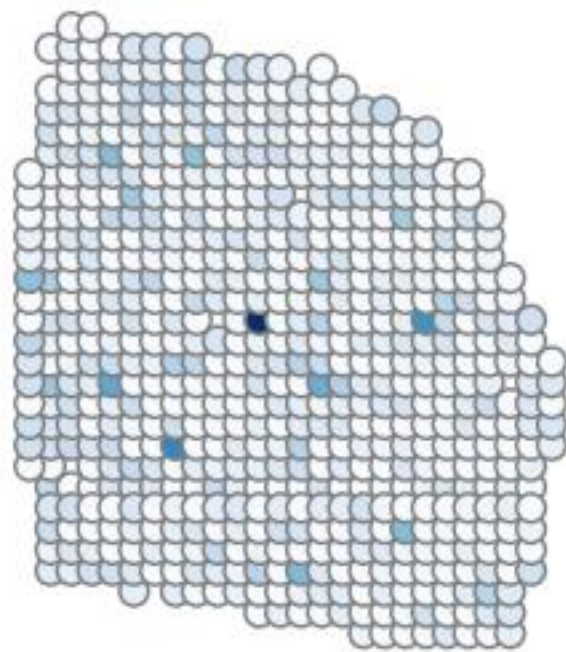

Endothelial ACKR1

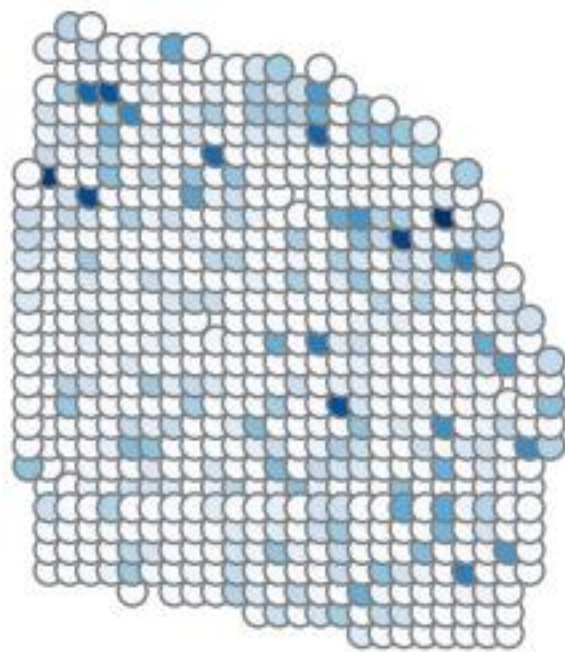

Cancer Epithelial

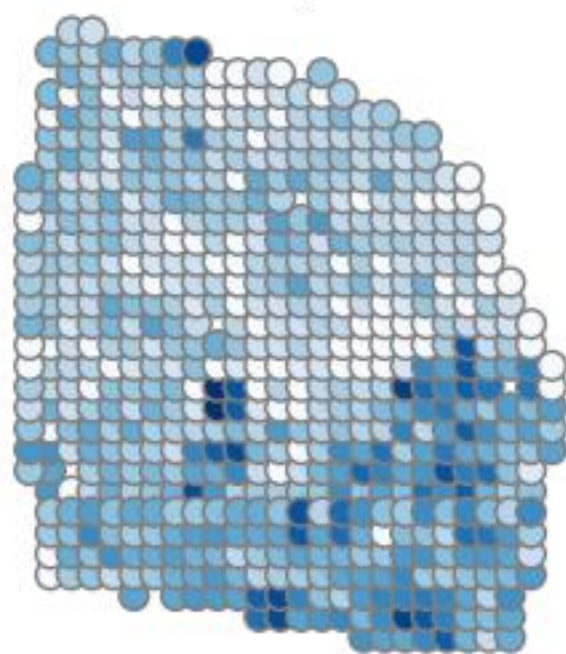

Normal Epithelial

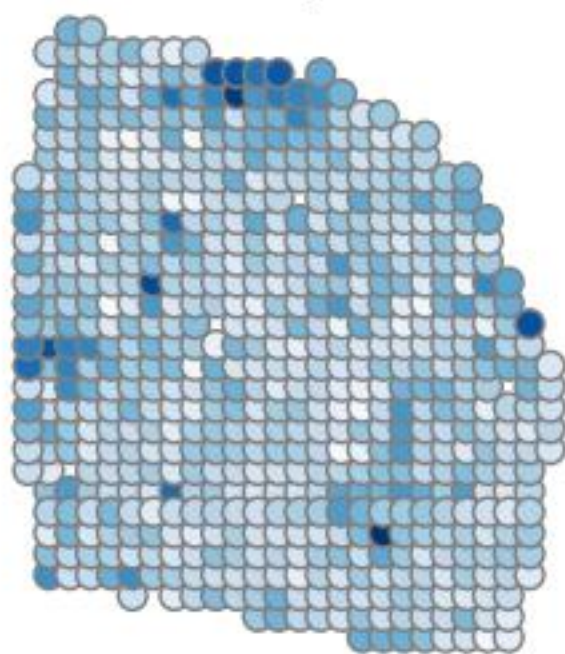

Cycling Myeloid

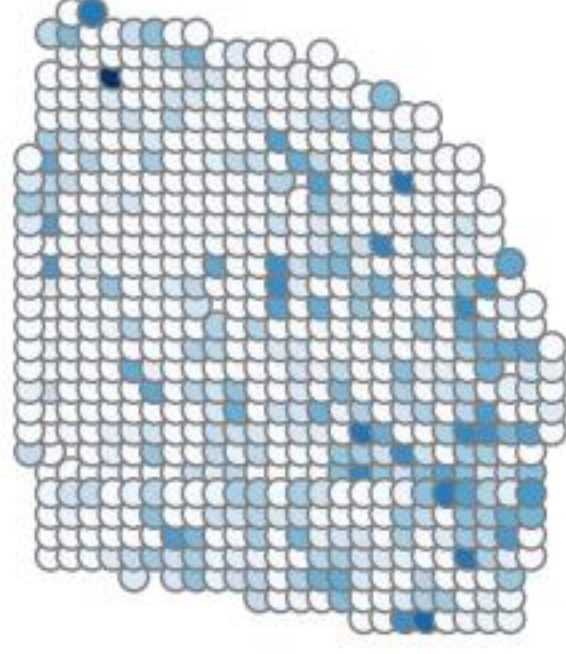

DCs

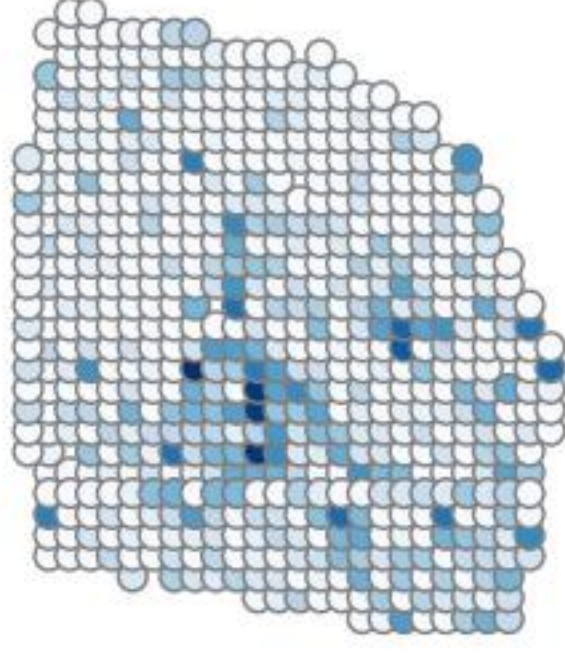

Macrophages

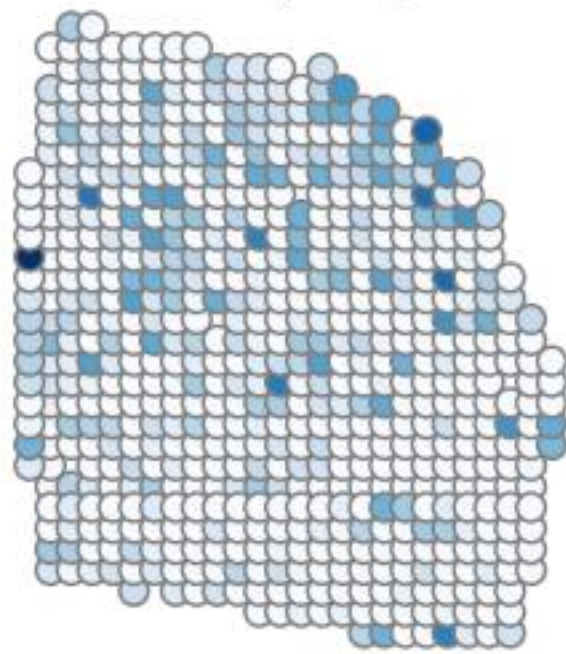

Monocytes

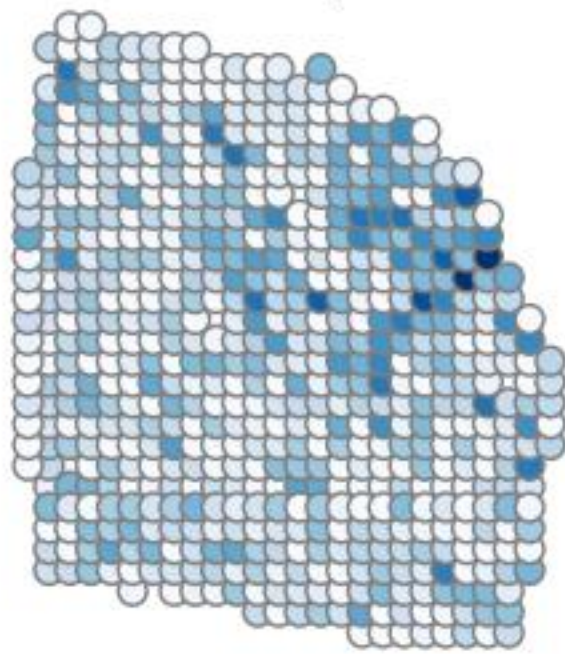

Plasma Cells

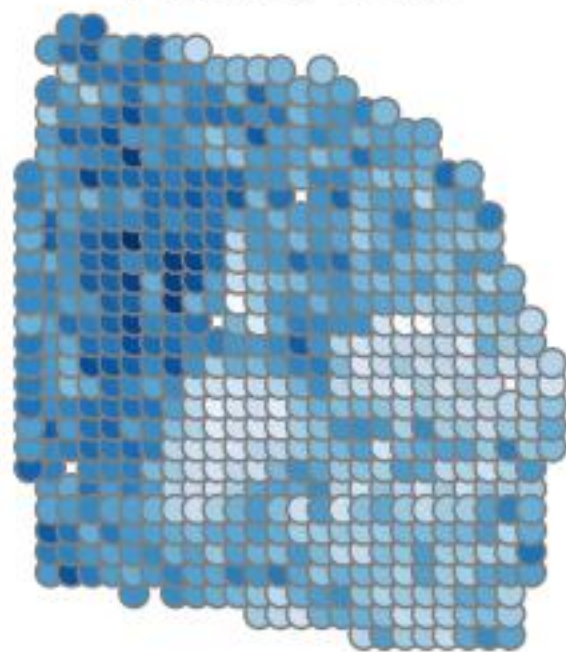

PVL Differentiated

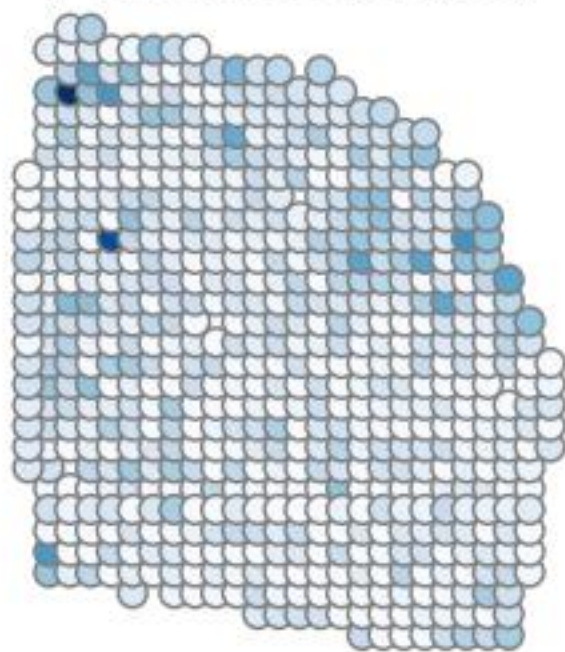

PVL Immature

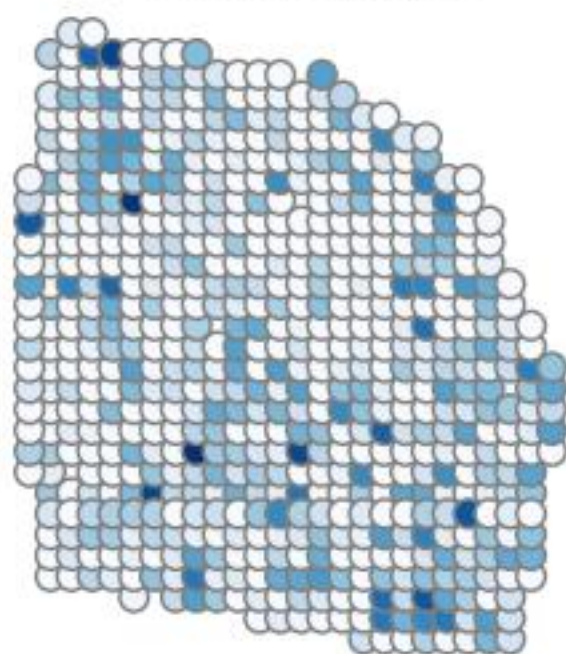

CD4+ T-cells

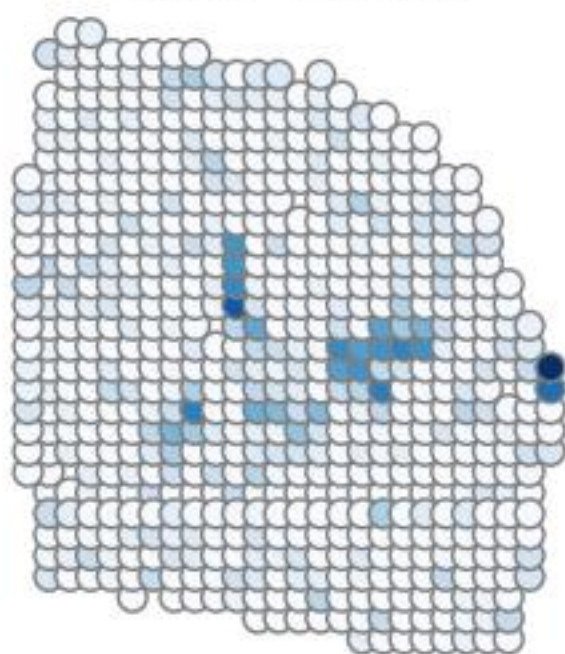

CD8+ T-cells

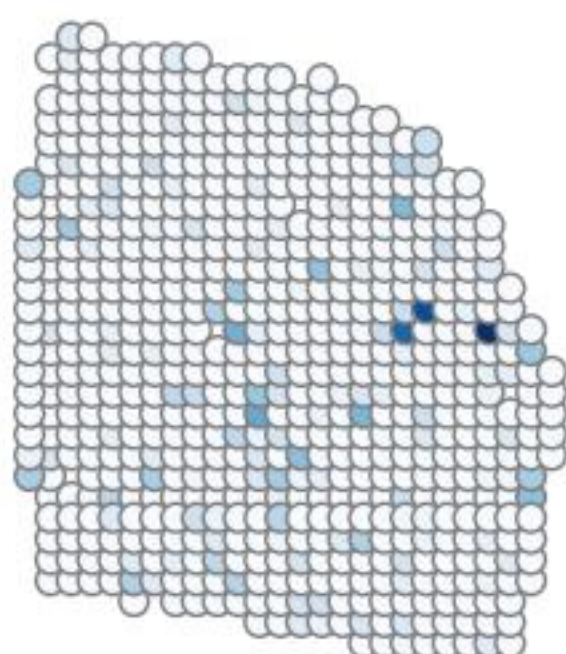

Cycling T-cells

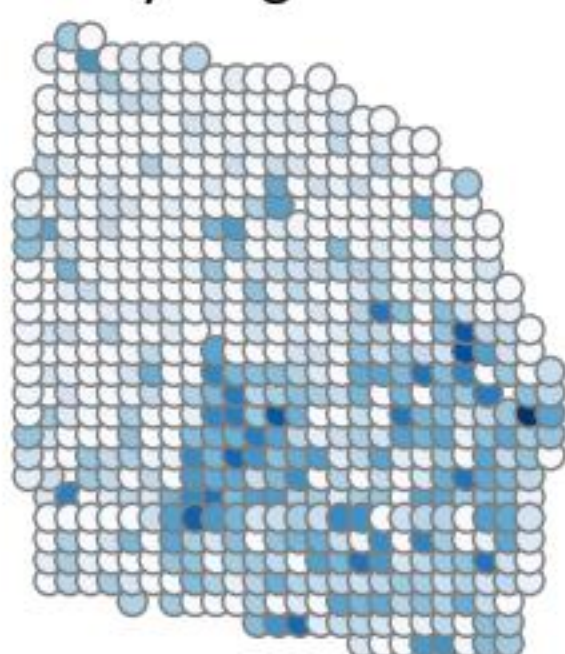

NK cells

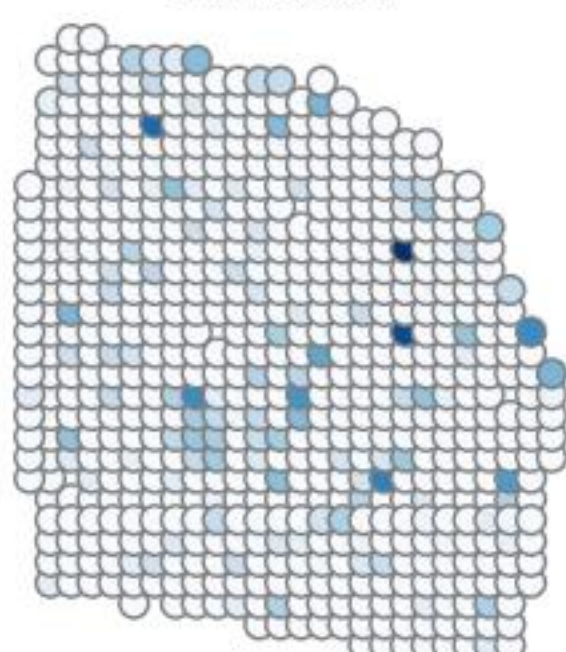

NKT cells

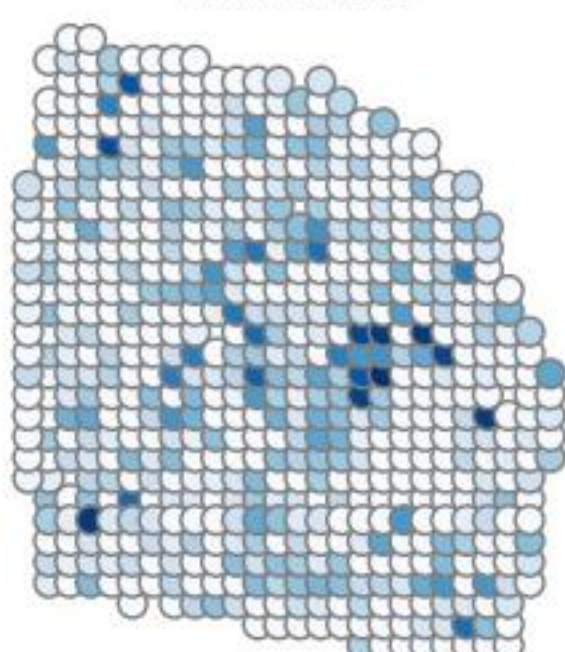

# minor\_F1

B-cells Memory

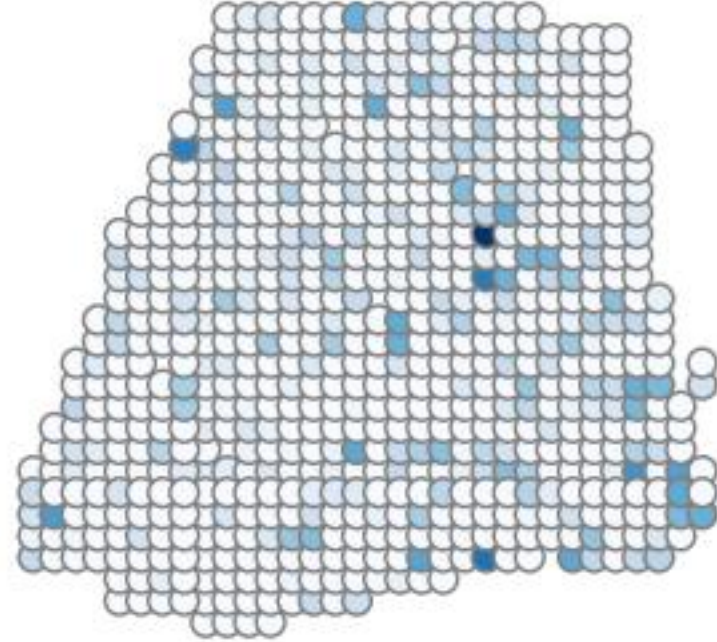

B-cells Naive

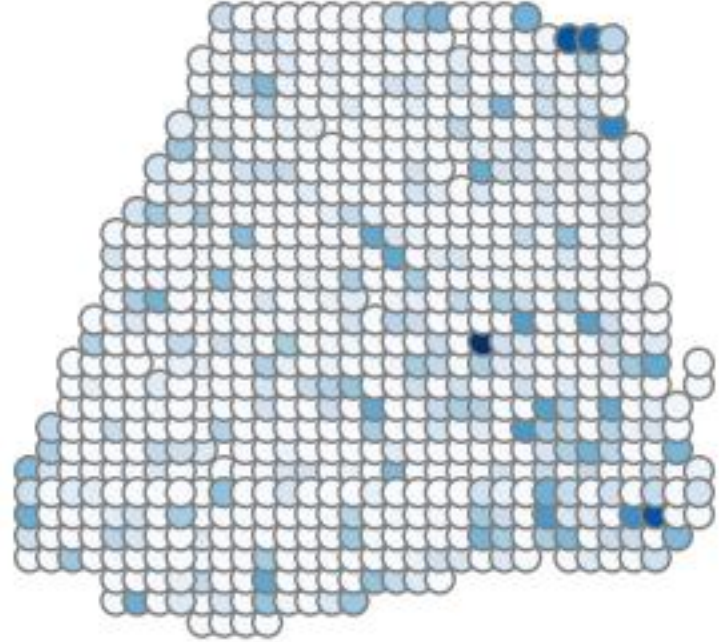

CAFs MSC/iCAF-like

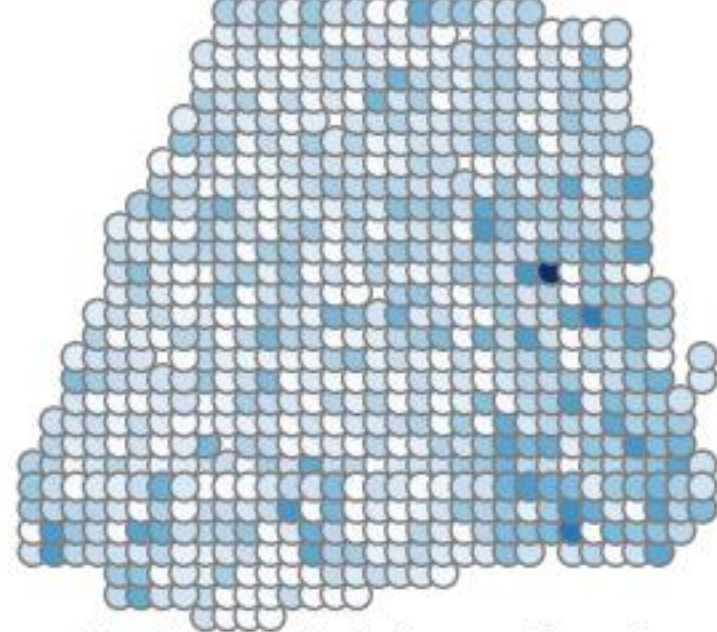

CAFs myCAF-like

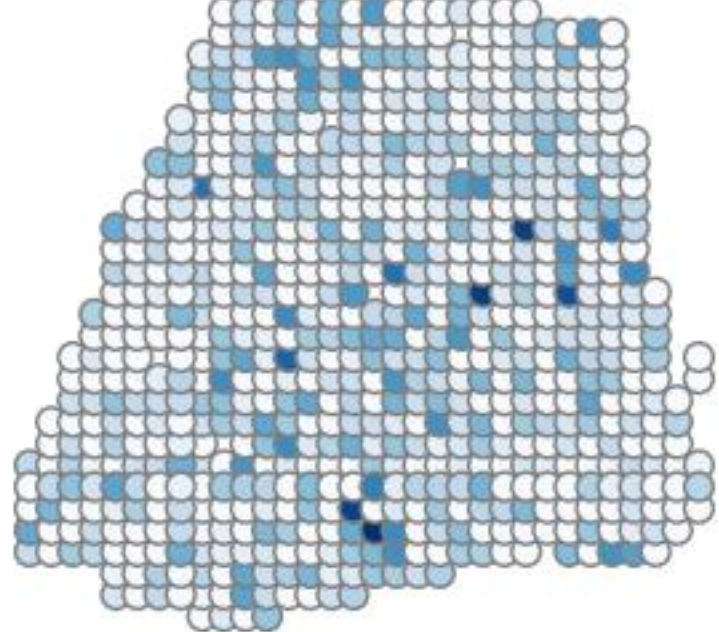

Endothelial Lymphatic  
LYVE1

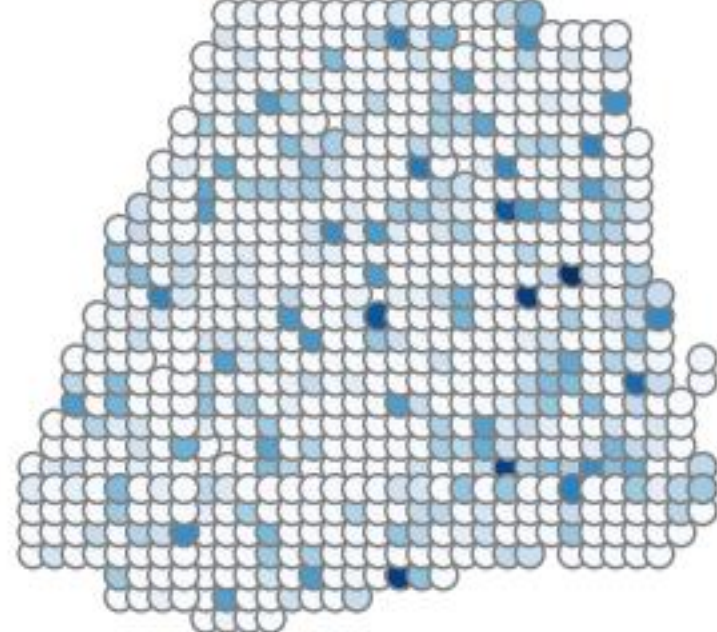

Endothelial RGS5

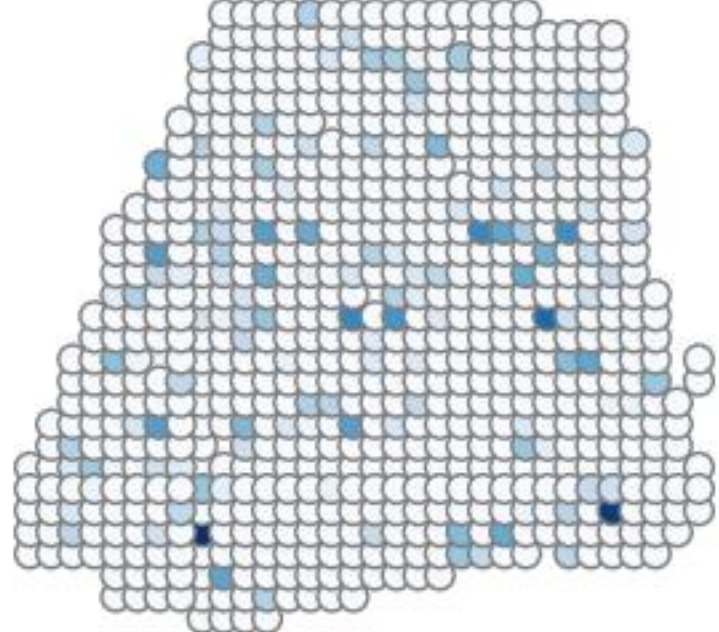

Endothelial CXCL12

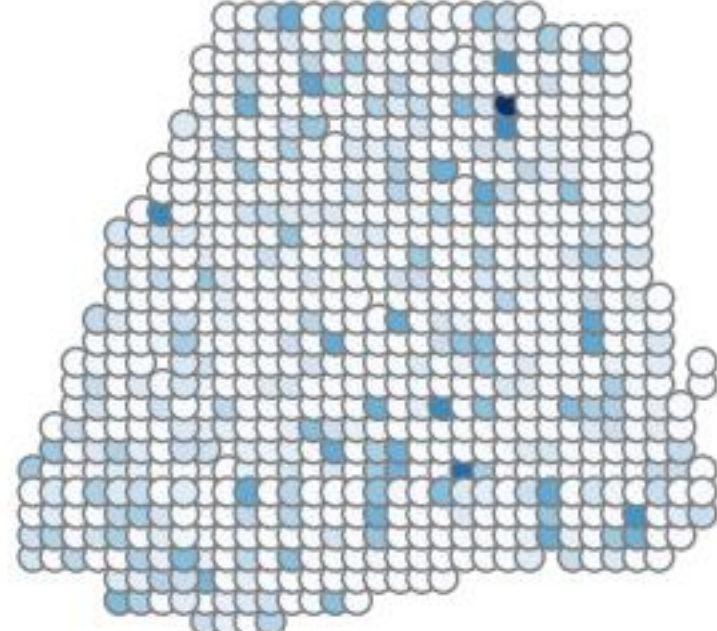

Endothelial ACKR1

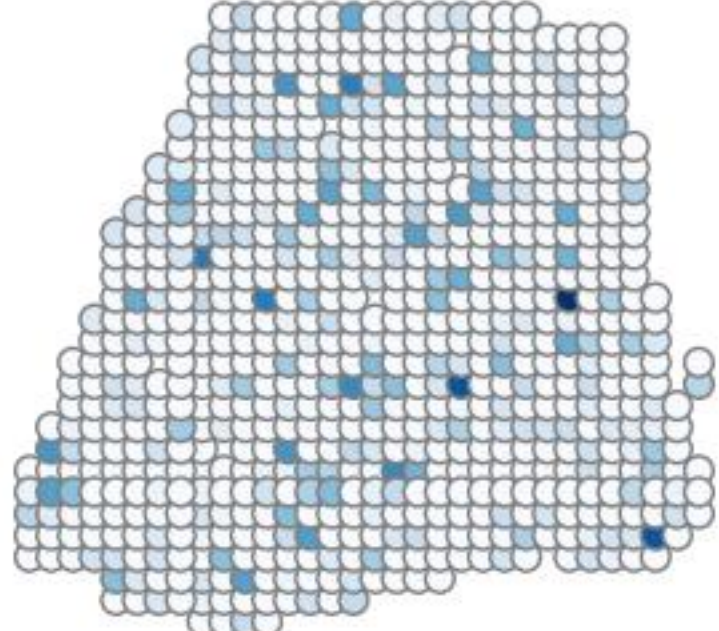

Cancer Epithelial

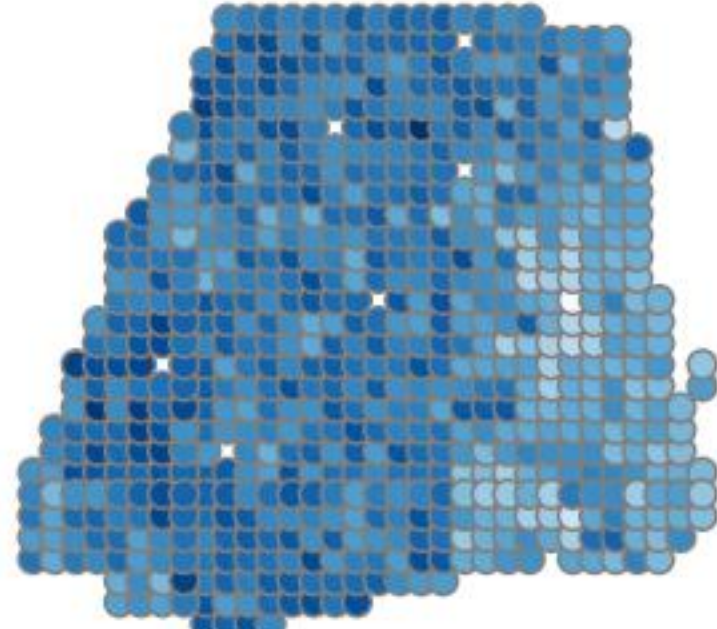

Normal Epithelial

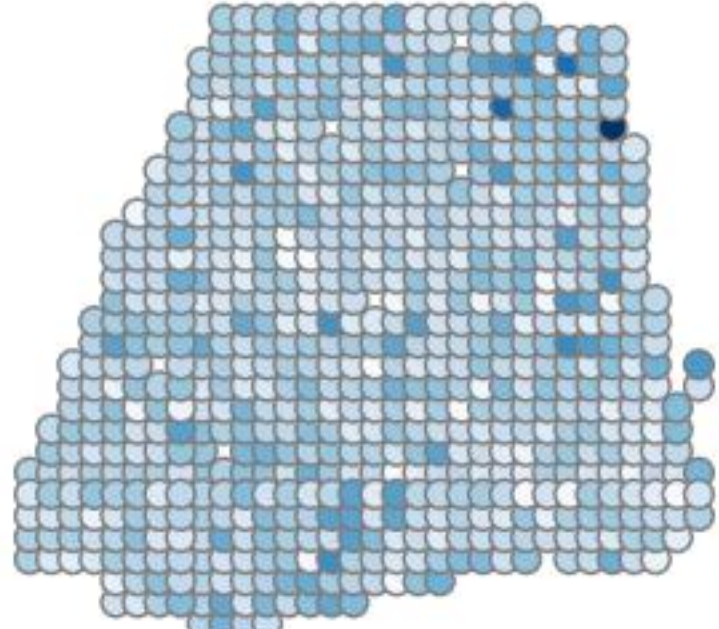

Cycling Myeloid

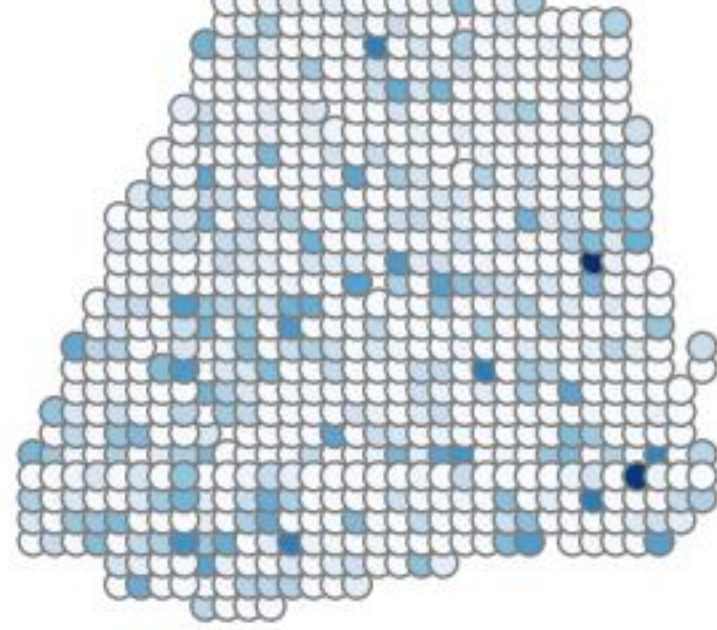

DCs

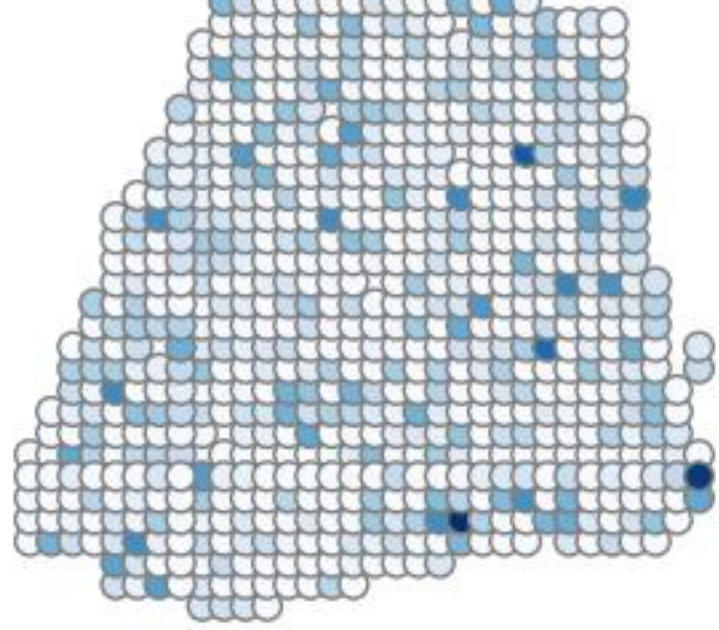

Macrophages

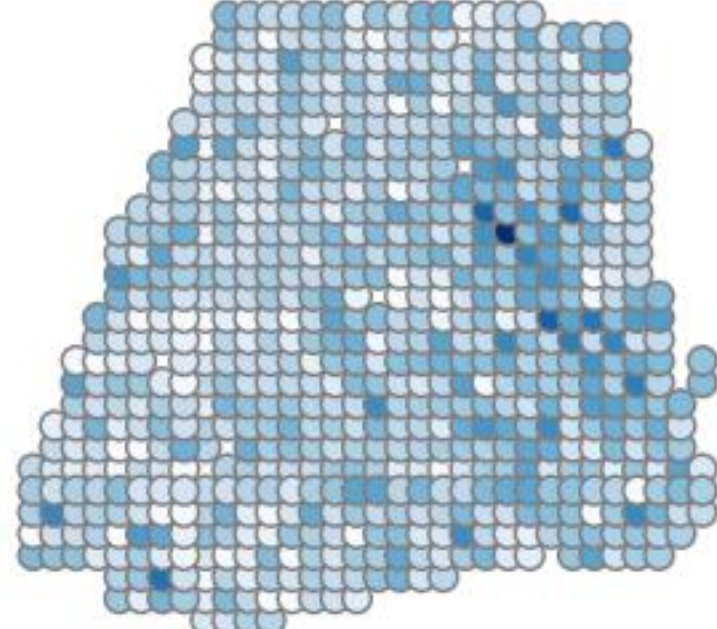

Monocytes

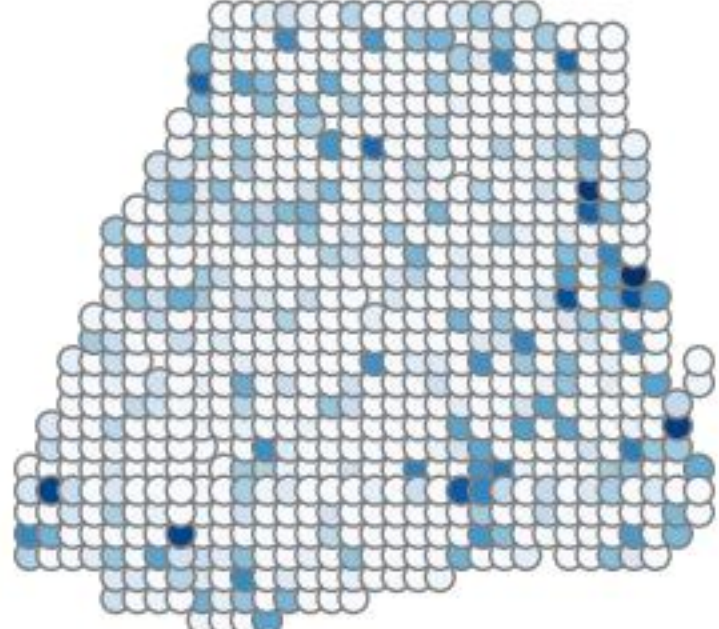

Plasma Cells

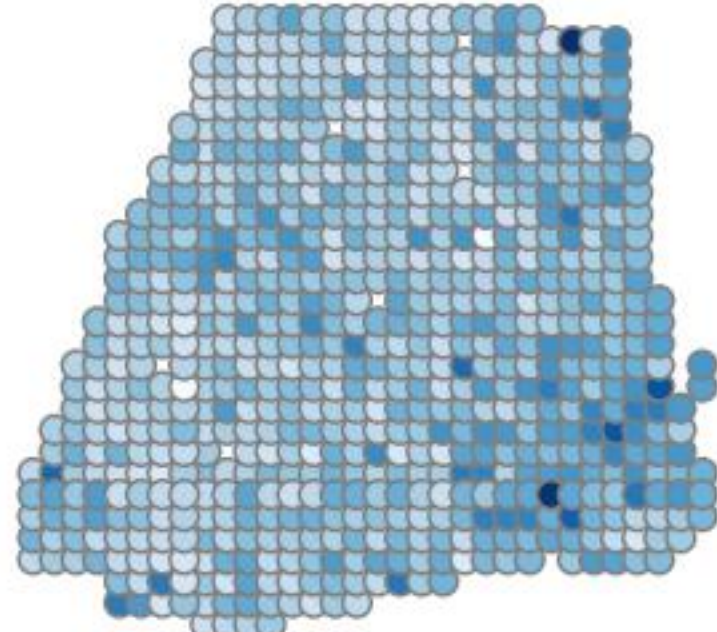

PVL Differentiated

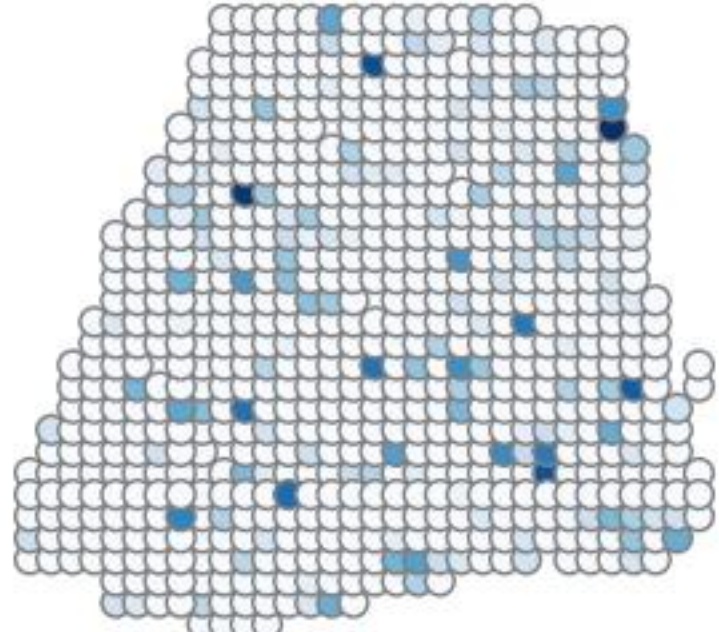

PVL Immature

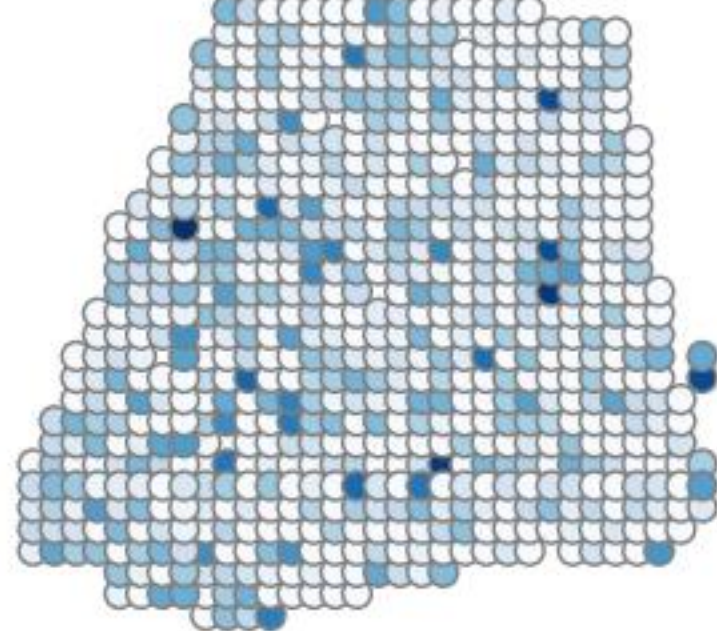

CD4+ T-cells

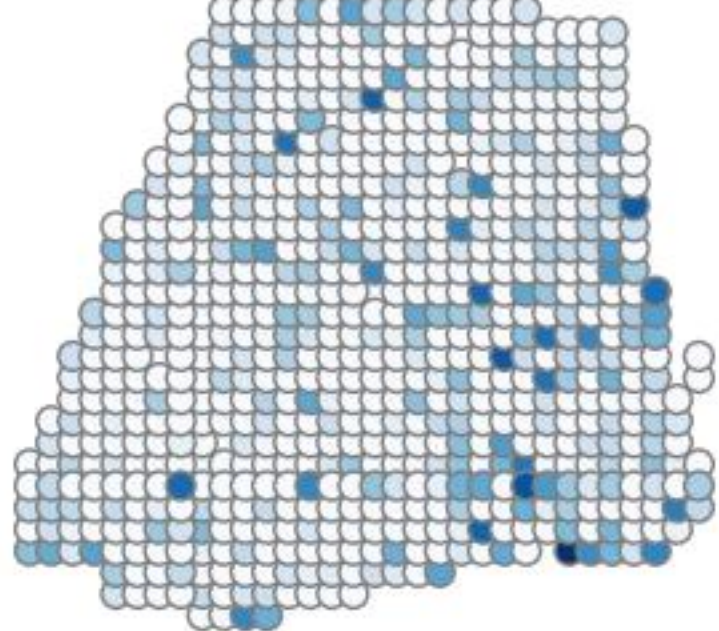

CD8+ T-cells

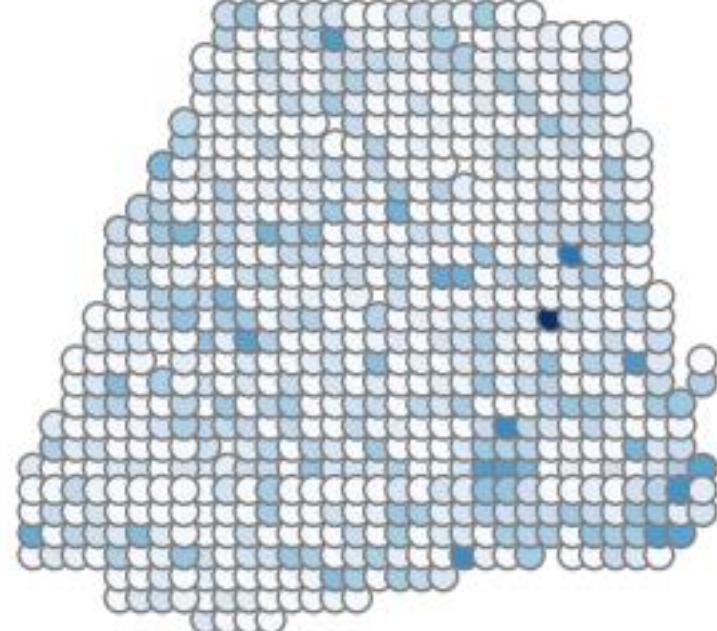

Cycling T-cells

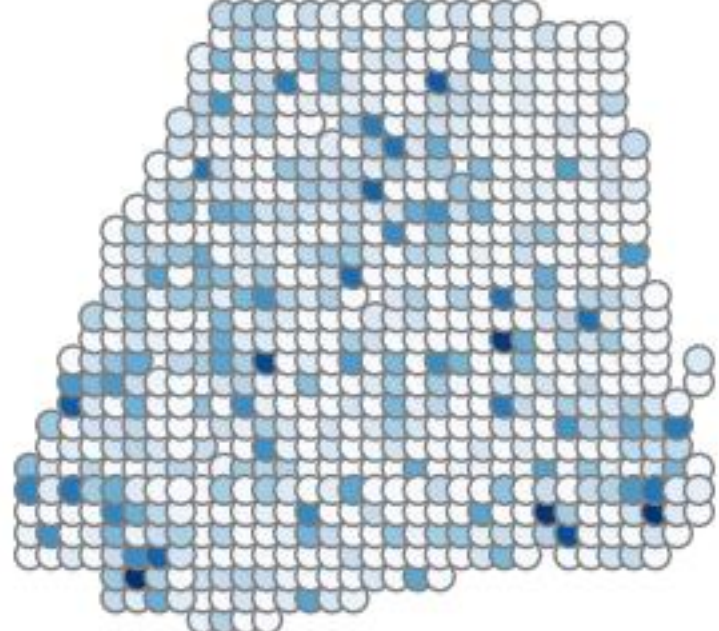

NK cells

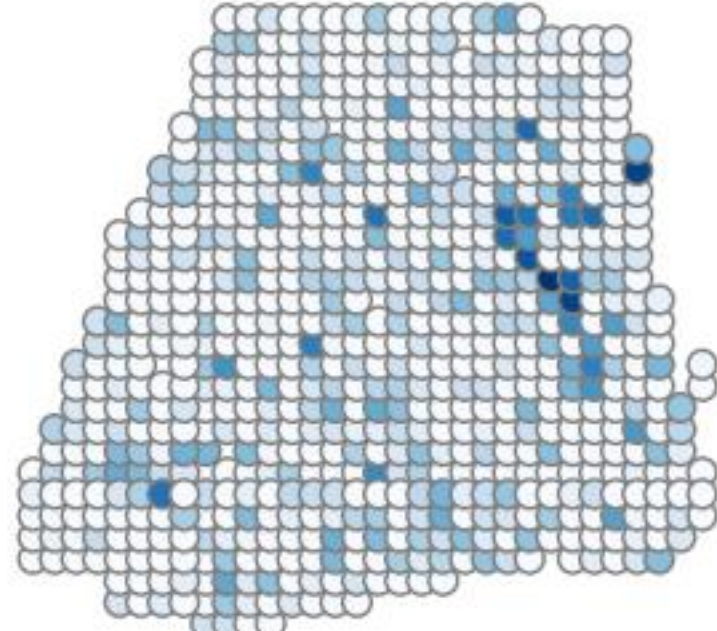

NKT cells

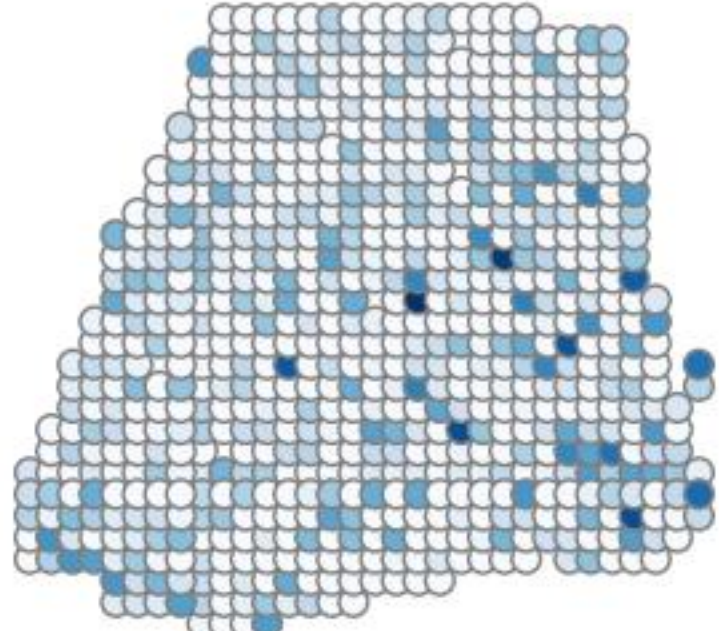

# minor\_B1

B-cells Memory

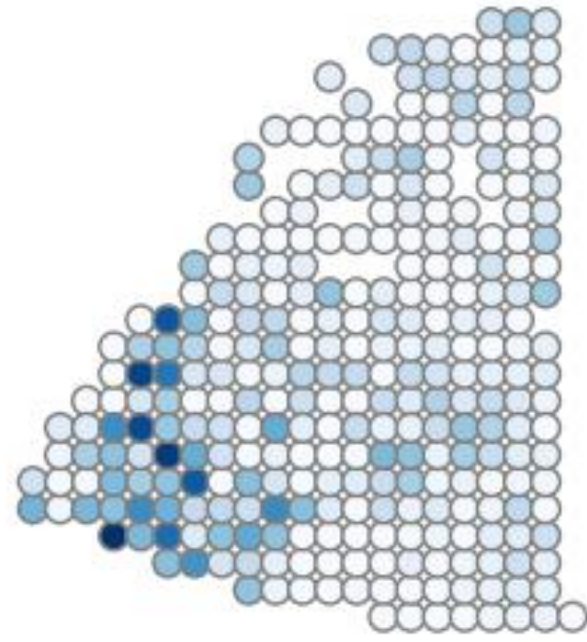

B-cells Naive

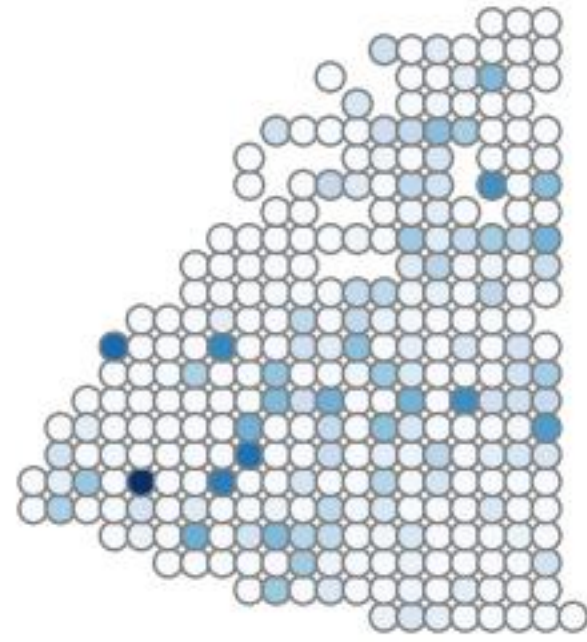

CAFs MSC/iCAF-like

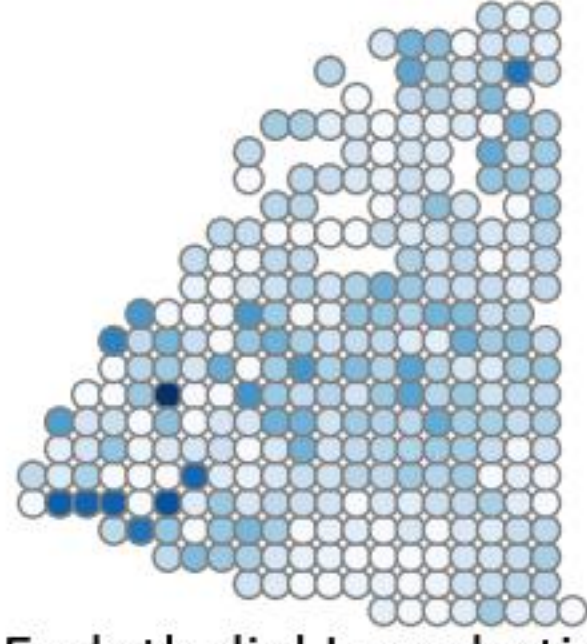

CAFs myCAF-like

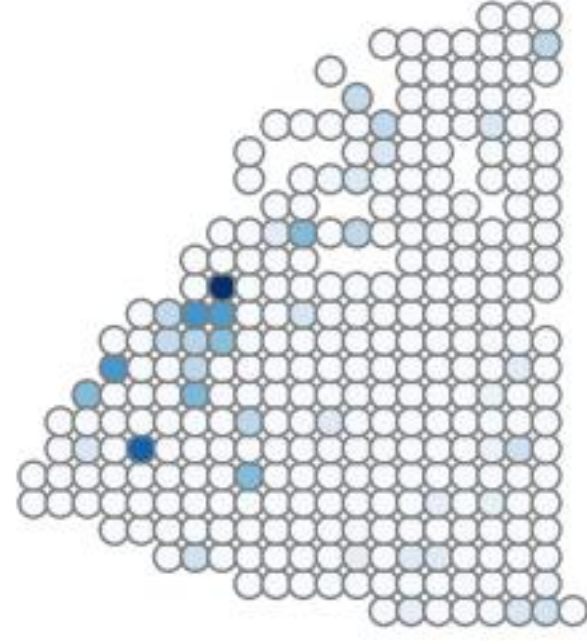

Endothelial Lymphatic  
LYVE1

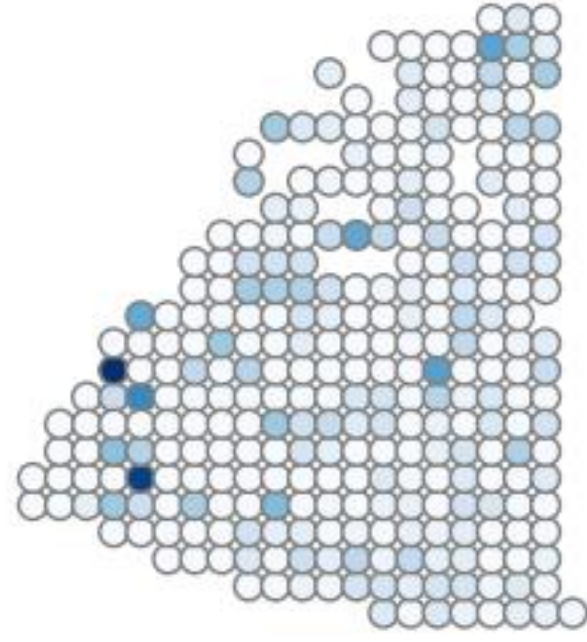

Endothelial RGS5

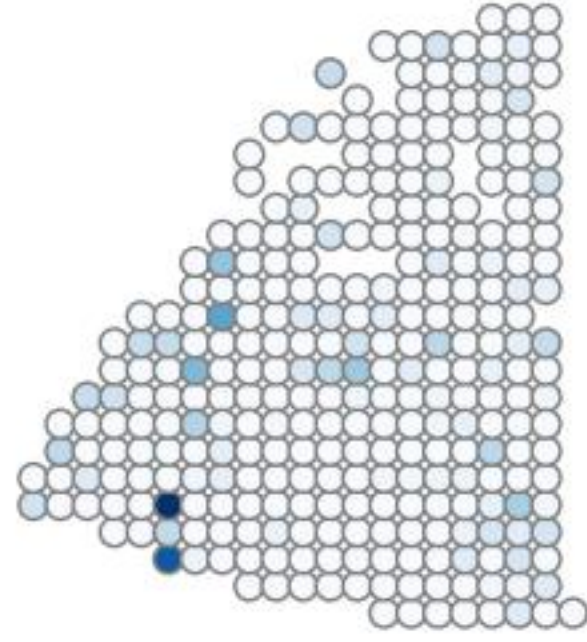

Endothelial CXCL12

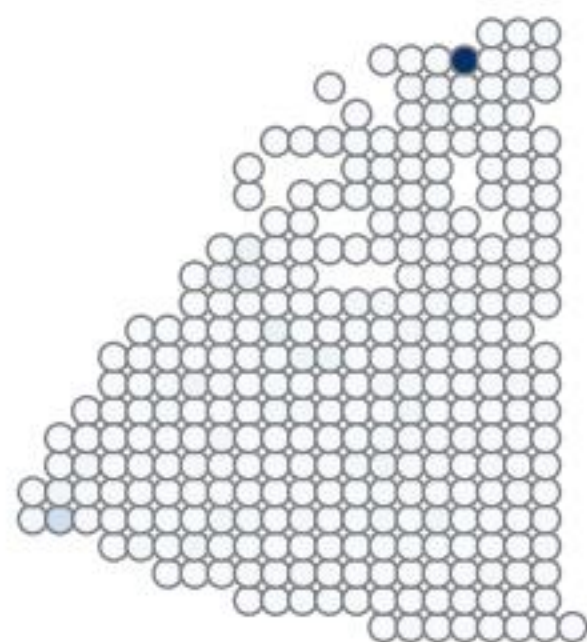

Endothelial ACKR1

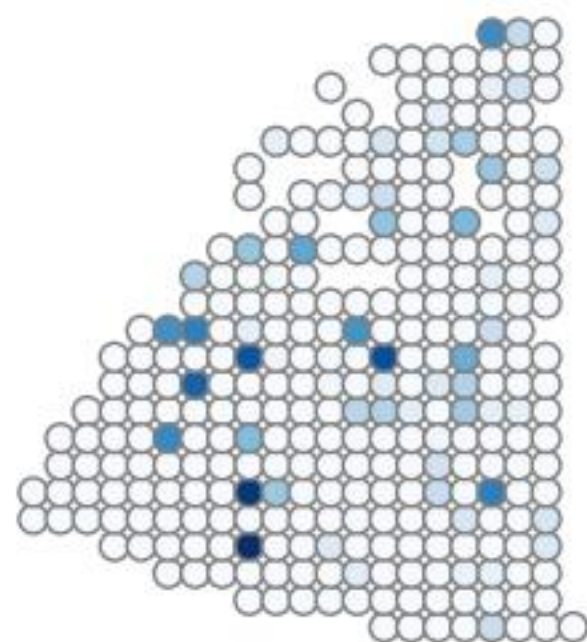

Cancer Epithelial

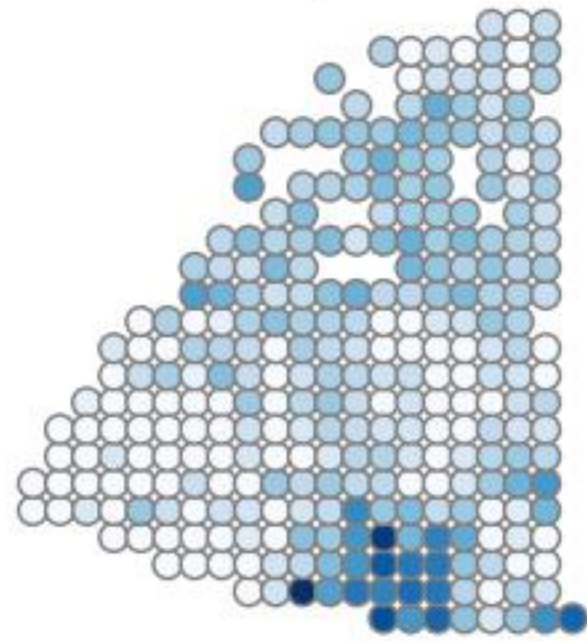

Normal Epithelial

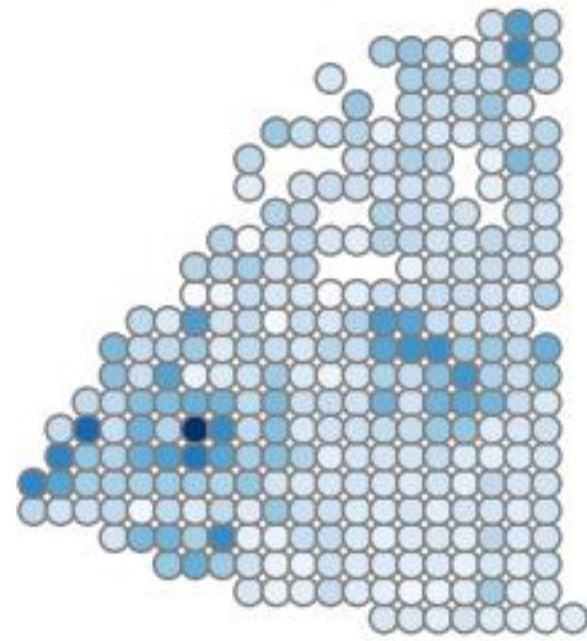

Cycling Myeloid

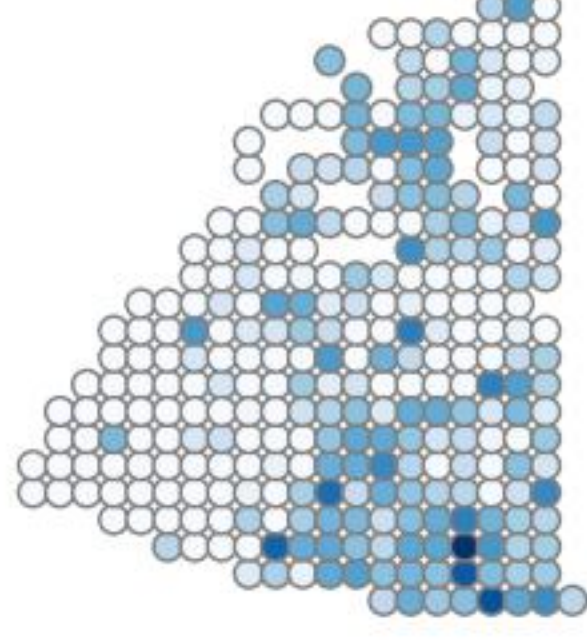

DCs

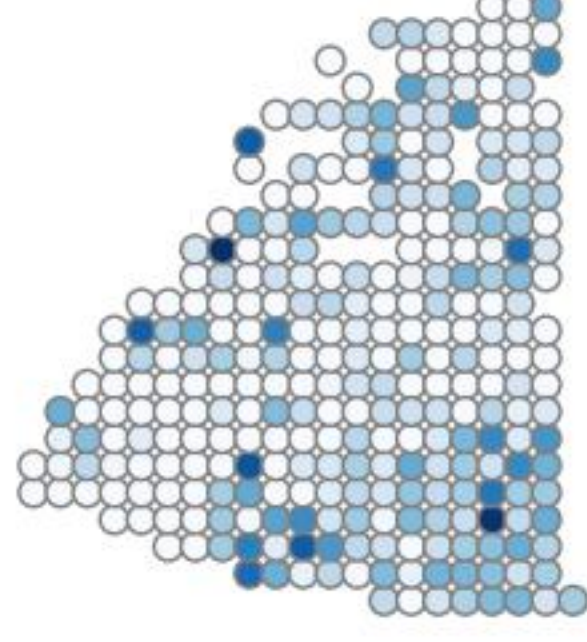

Macrophages

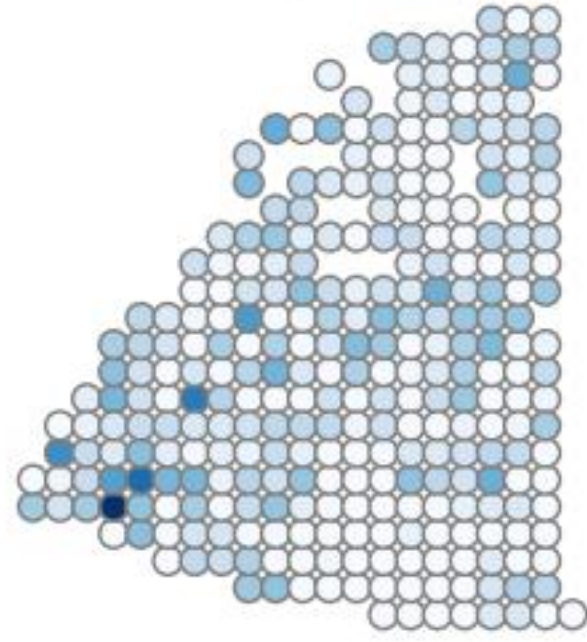

Monocytes

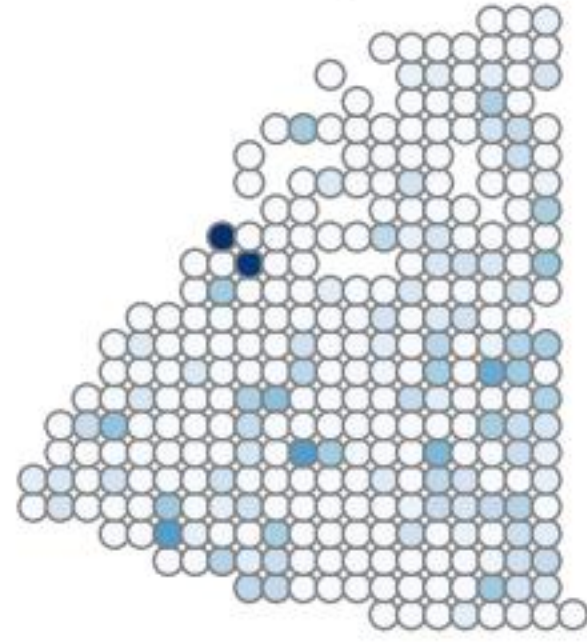

Plasma Cells

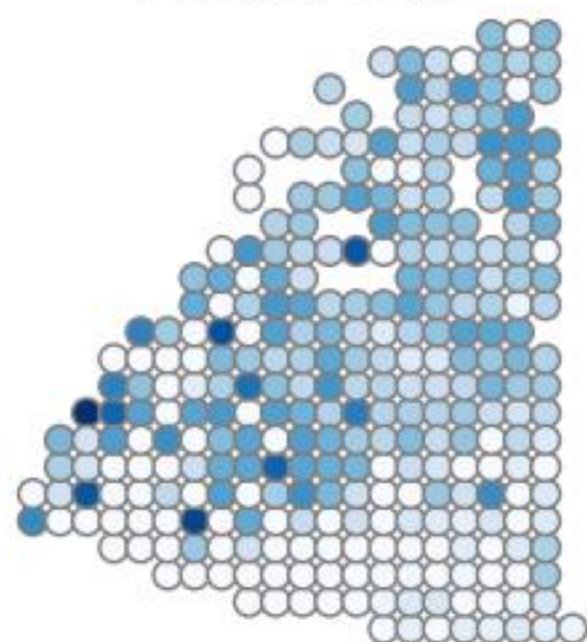

PVL Differentiated

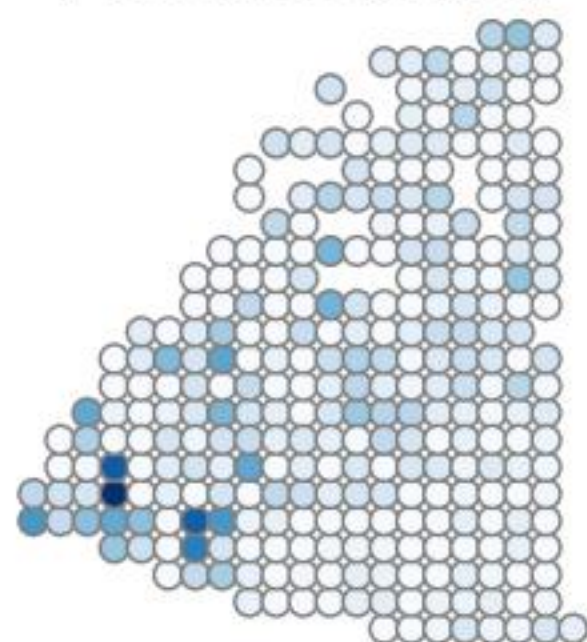

PVL Immature

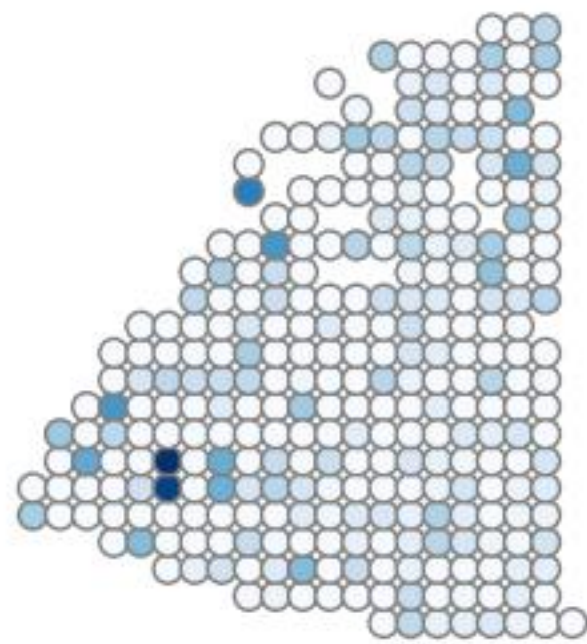

CD4+ T-cells

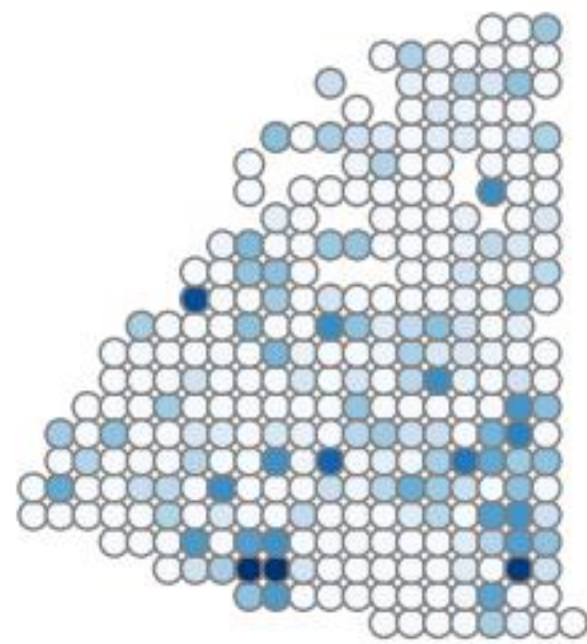

CD8+ T-cells

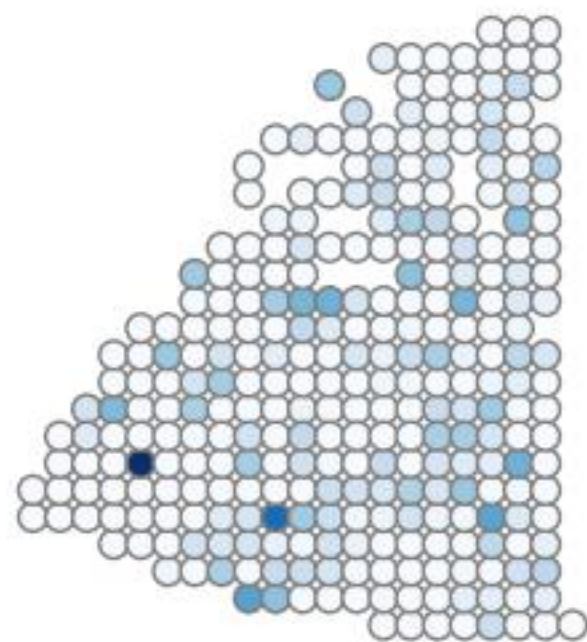

Cycling T-cells

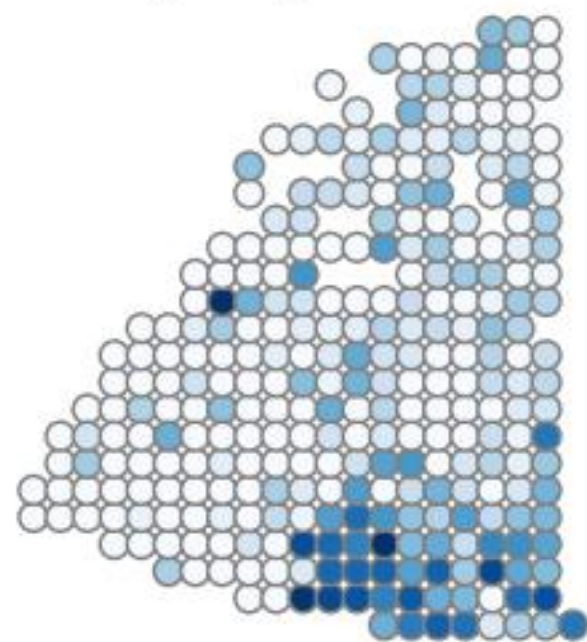

NK cells

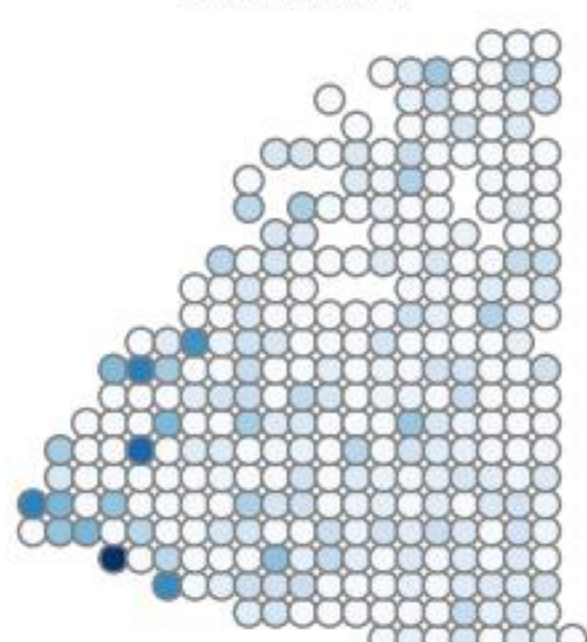

NKT cells

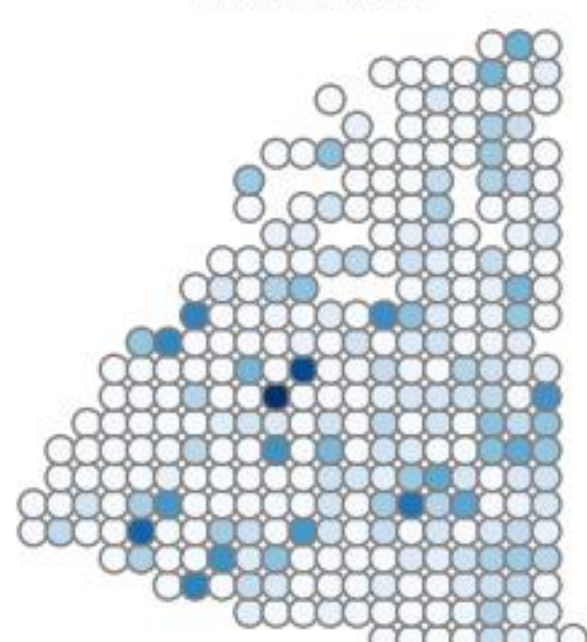

# minor\_G1

B-cells Memory

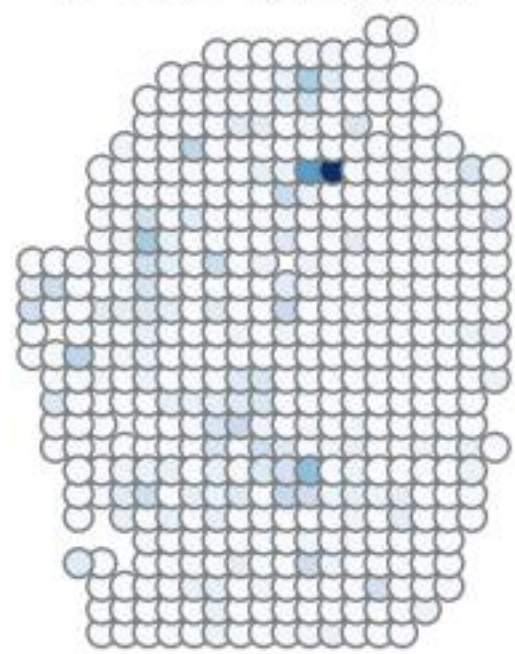

B-cells Naive

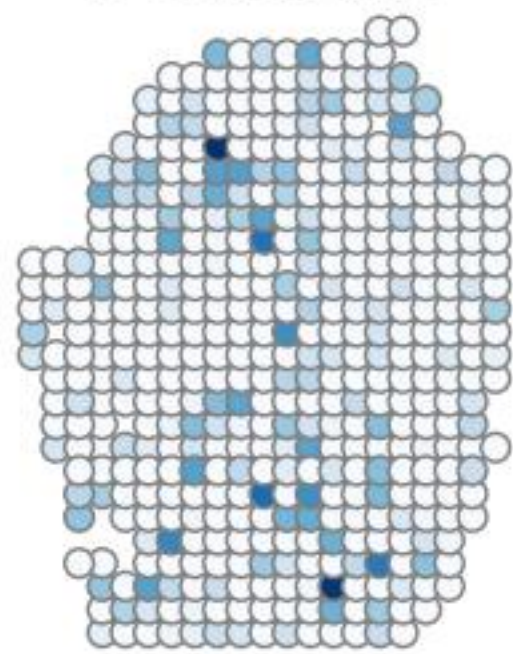

CAFs MSC/iCAF-like

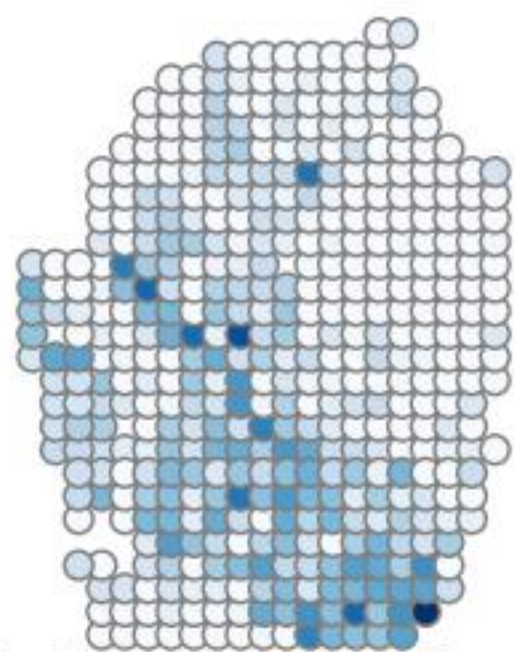

CAFs myCAF-like

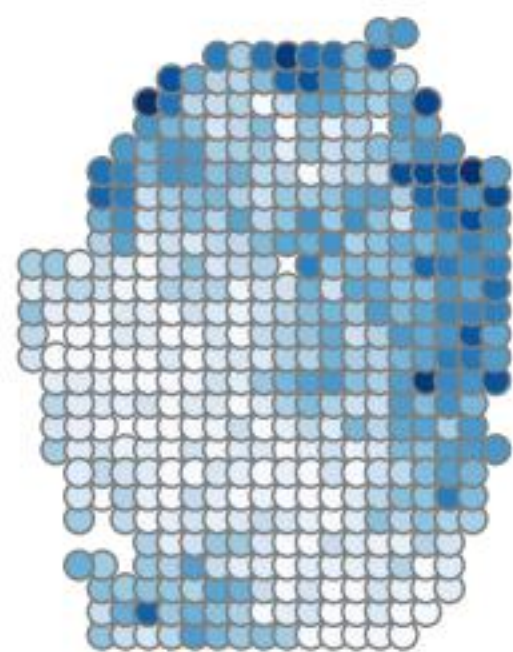

Endothelial Lymphatic  
LYVE1

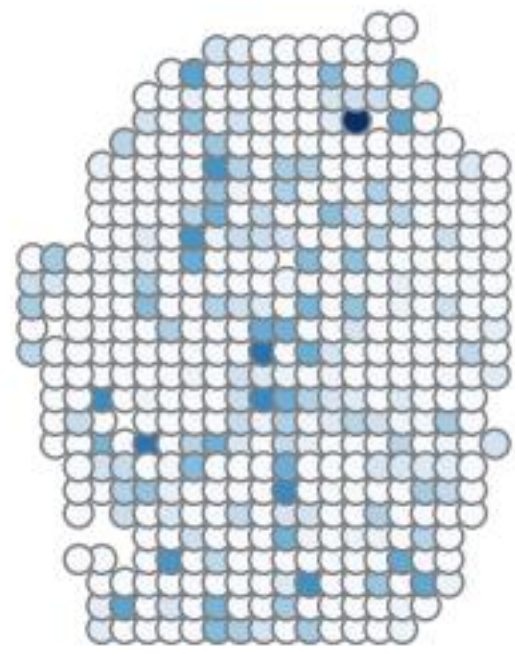

Endothelial RGS5

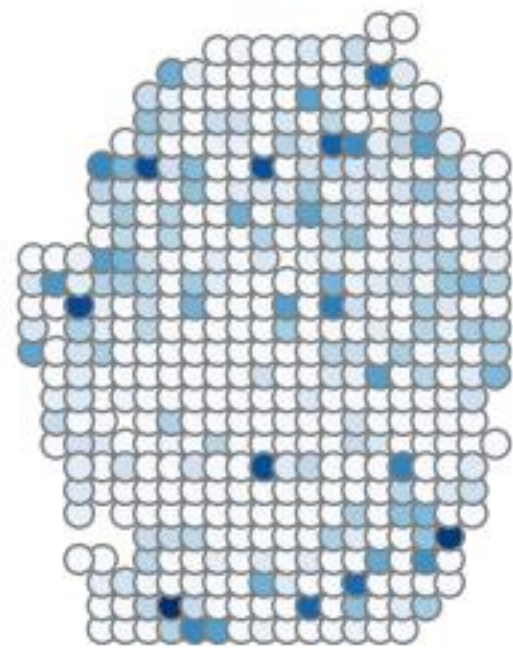

Endothelial CXCL12

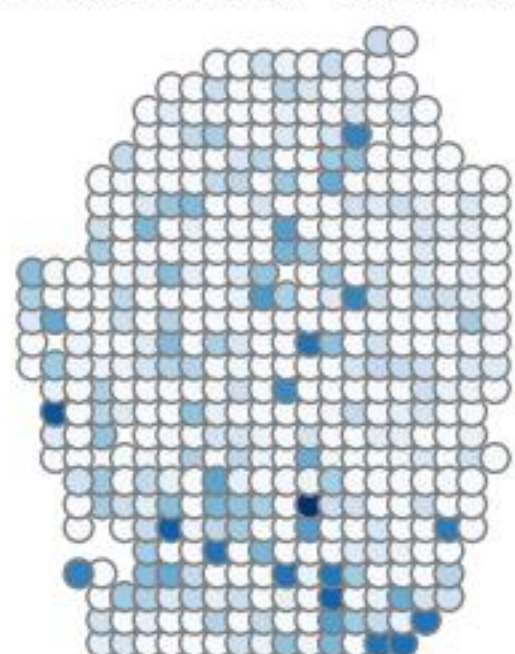

Endothelial ACKR1

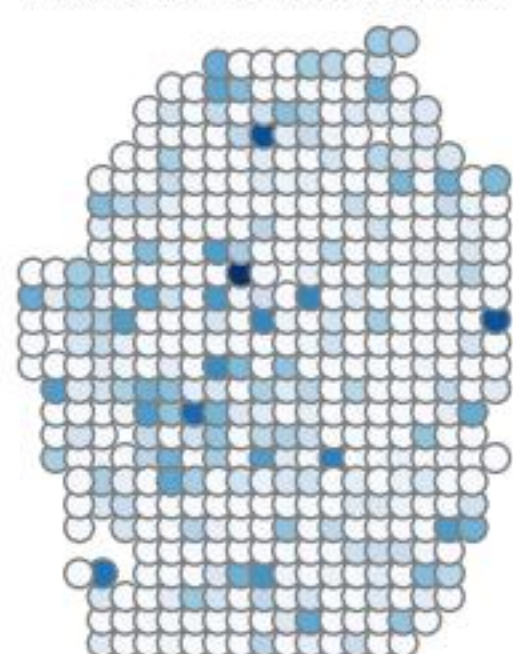

Cancer Epithelial

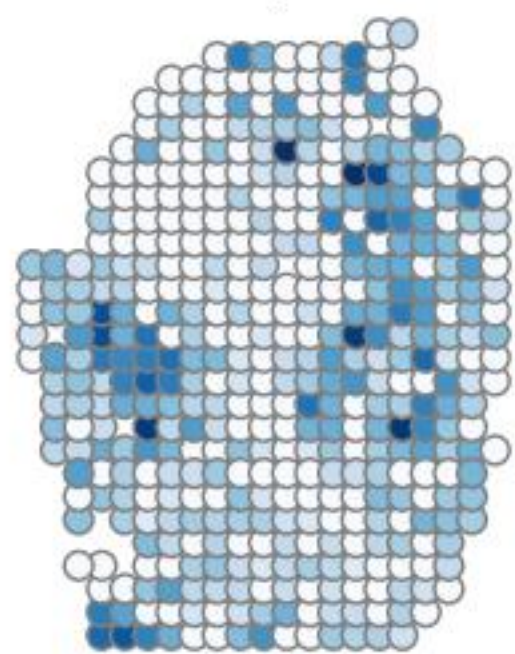

Normal Epithelial

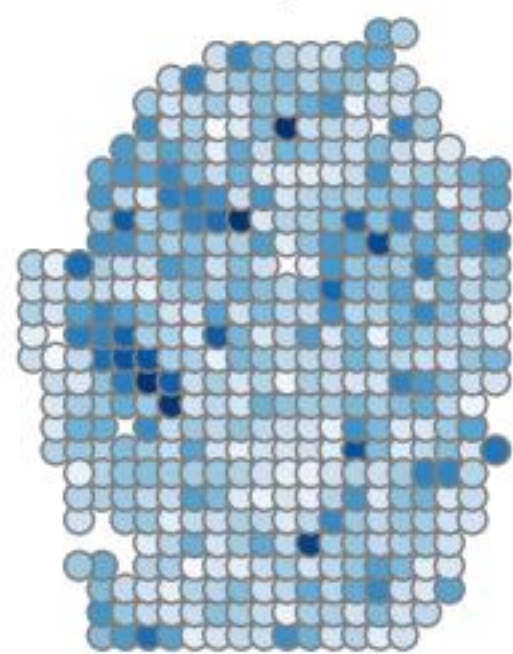

Cycling Myeloid

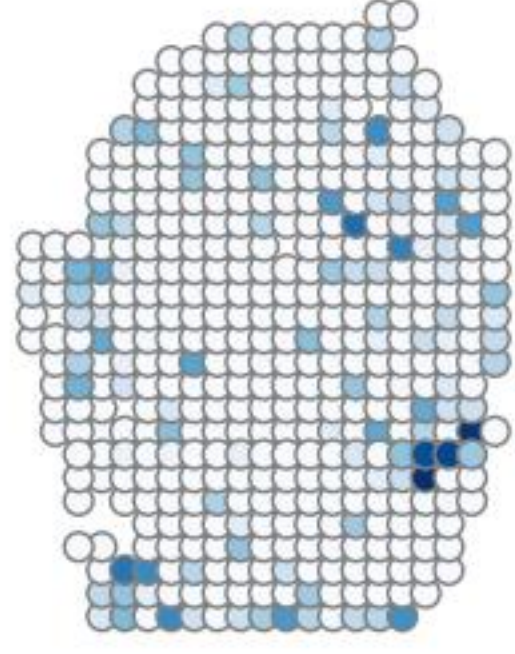

DCs

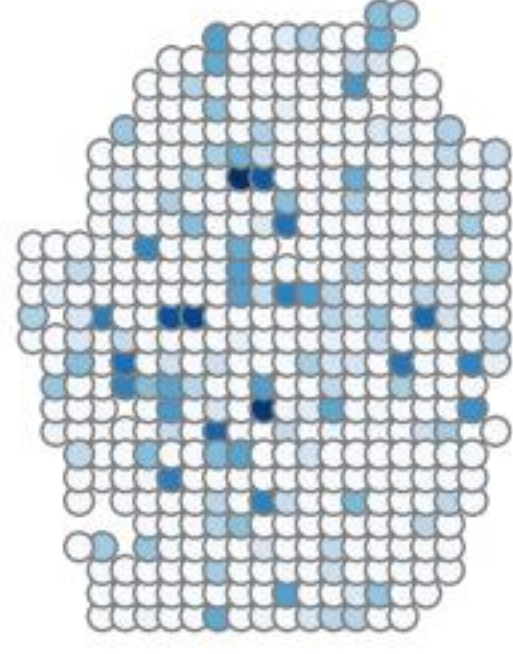

Macrophages

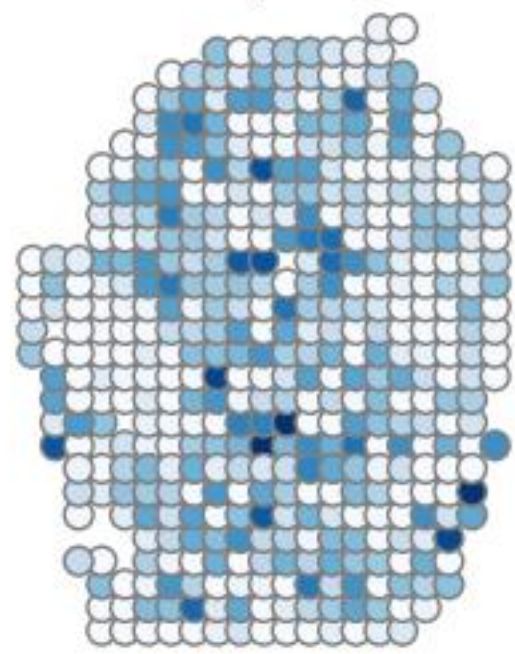

Monocytes

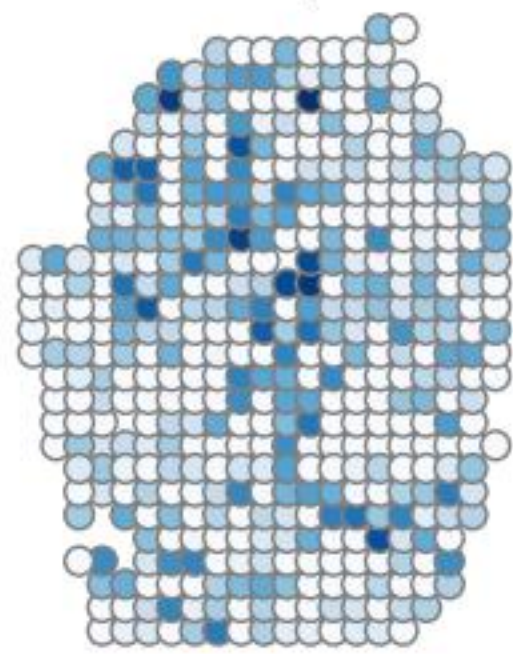

Plasma Cells

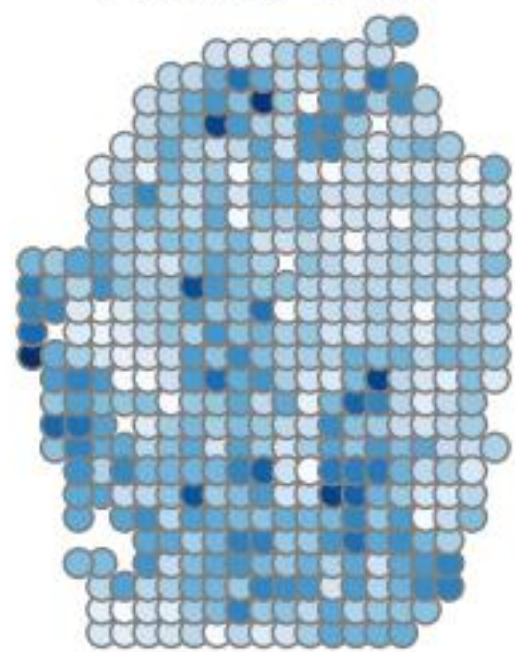

PVL Differentiated

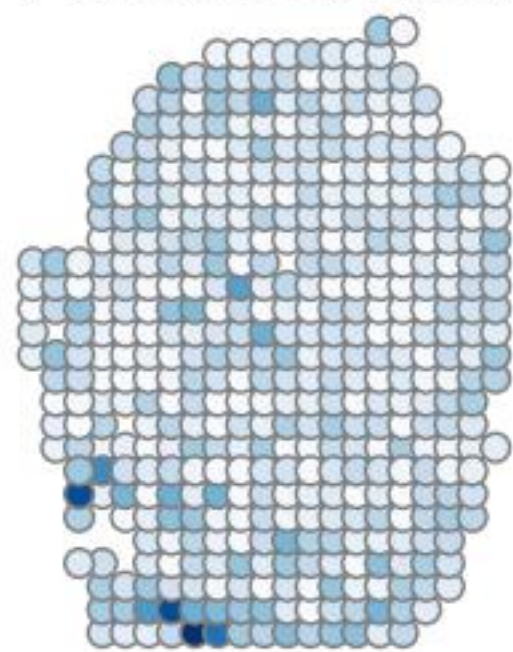

PVL Immature

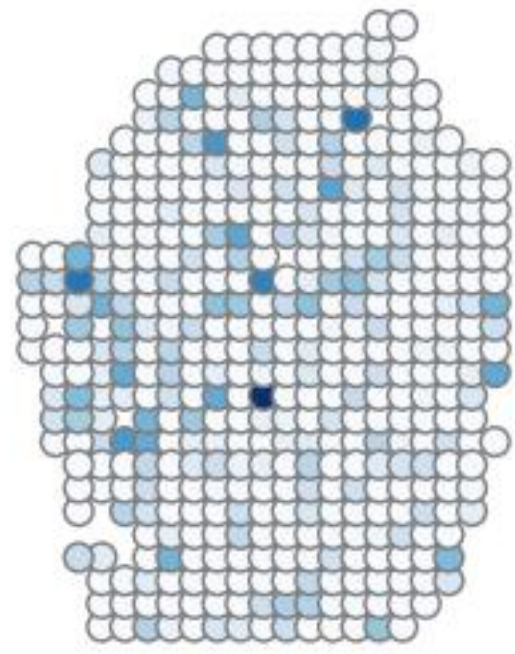

CD4+ T-cells

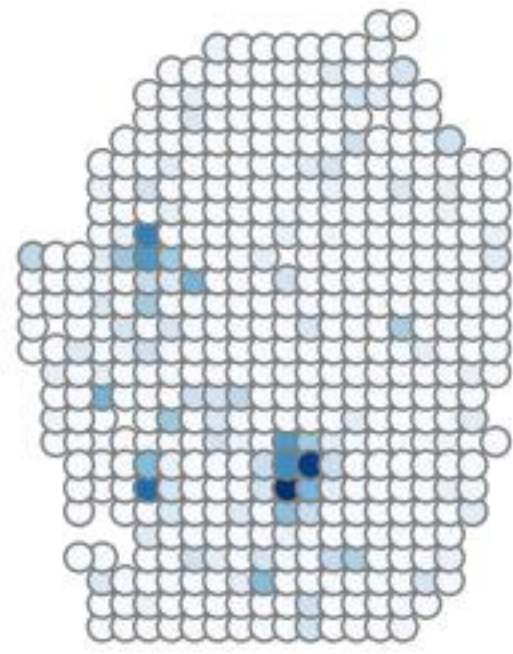

CD8+ T-cells

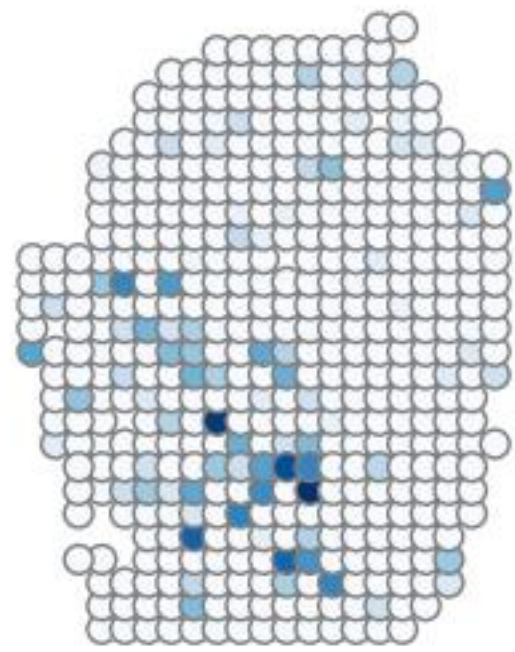

Cycling T-cells

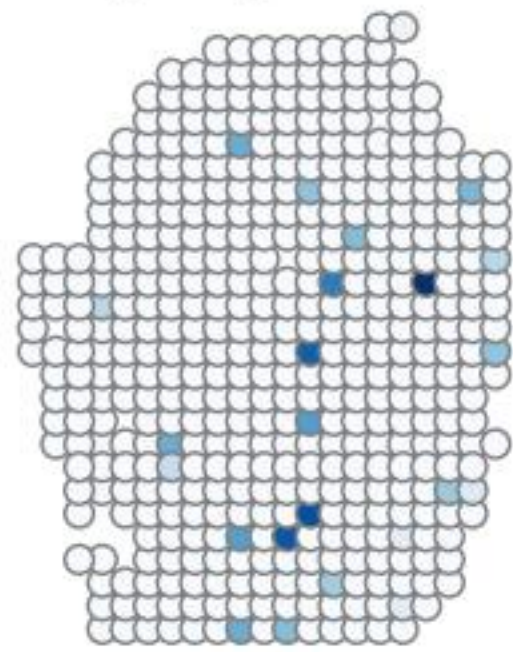

NK cells

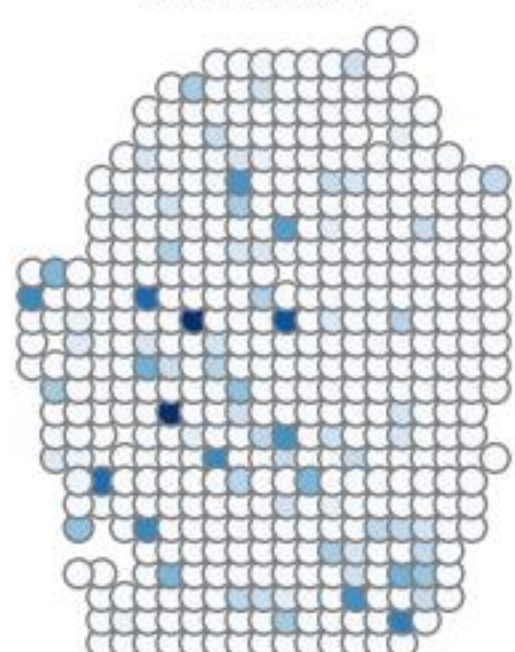

NKT cells

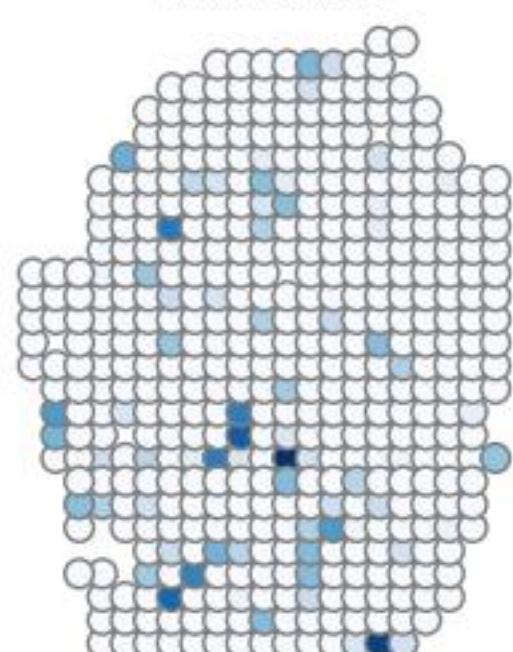



# minor\_D3

B-cells Memory

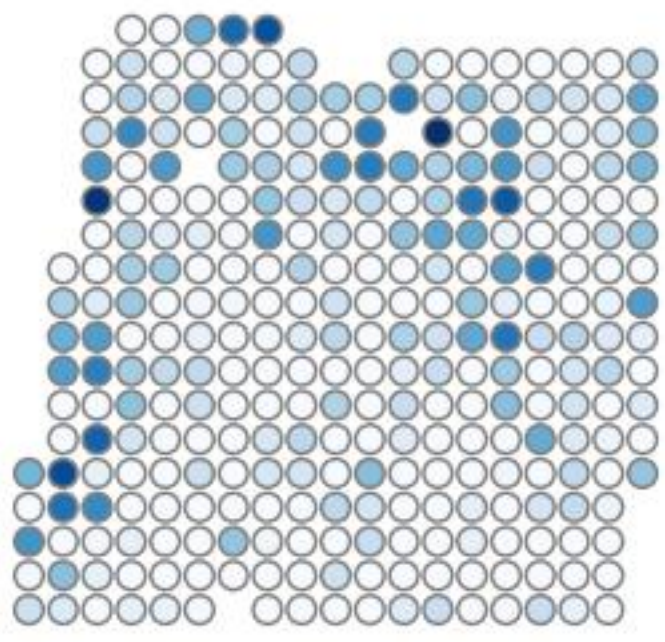

B-cells Naive

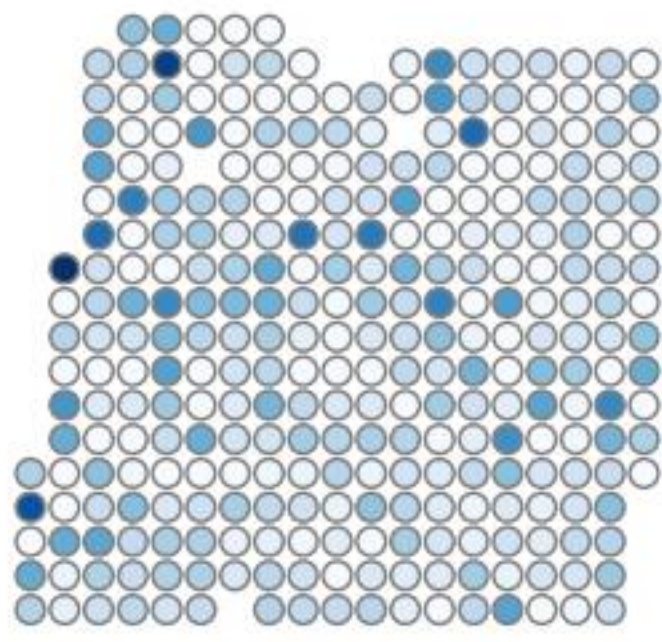

CAFs MSC/iCAF-like

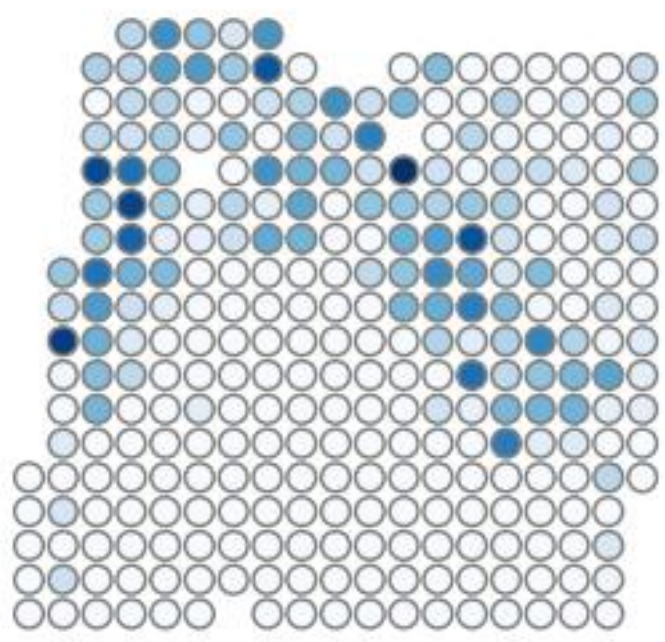

CAFs myCAF-like

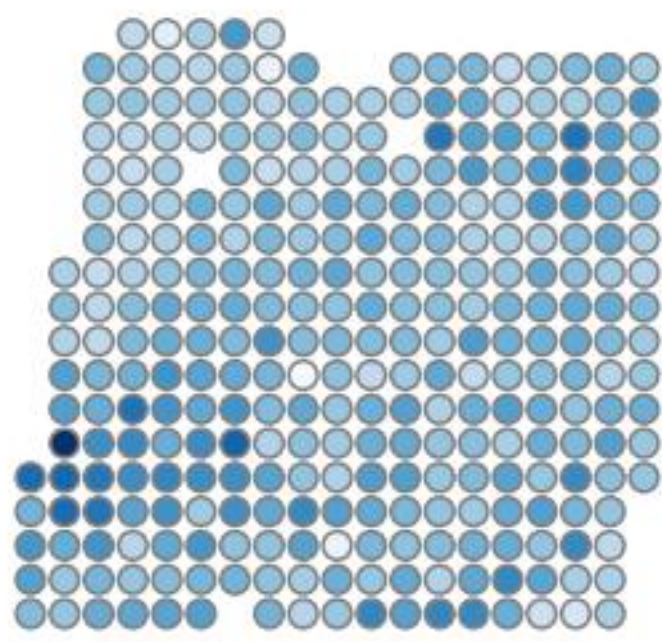

Endothelial Lymphatic LYVE1

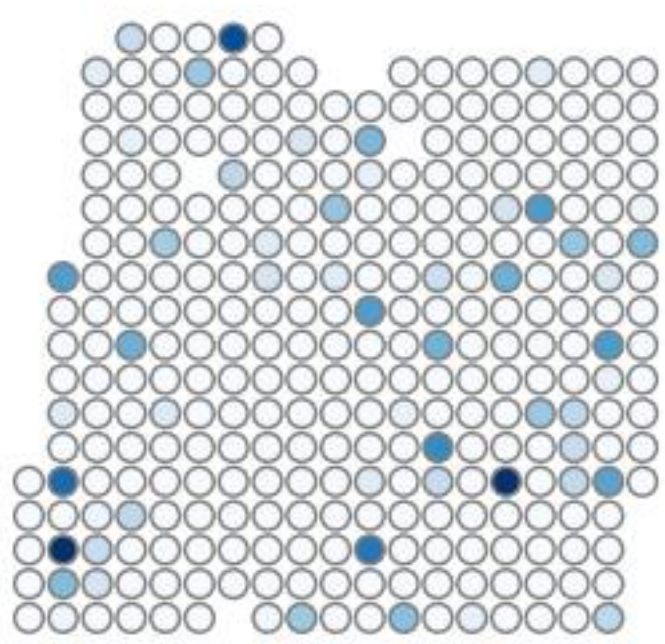

Endothelial RGS5

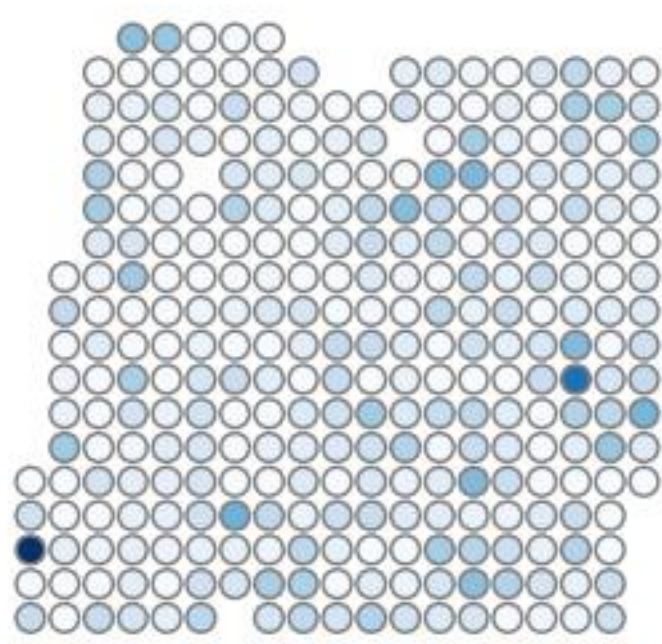

Endothelial CXCL12

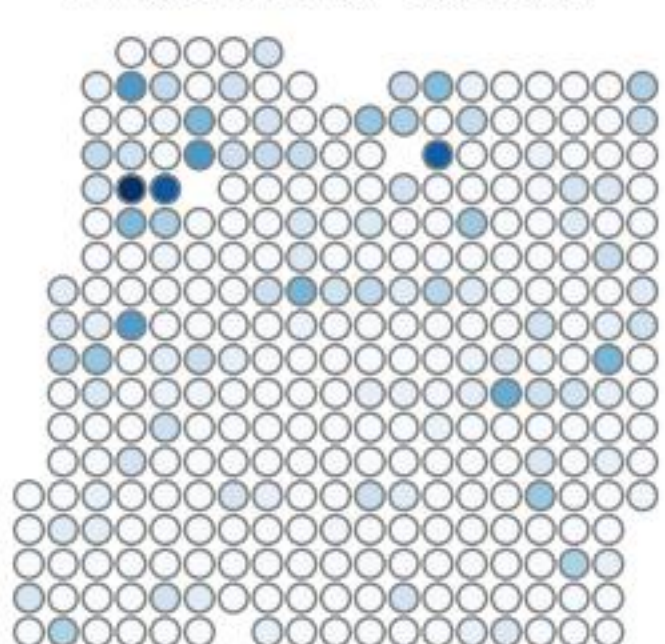

Endothelial ACKR1

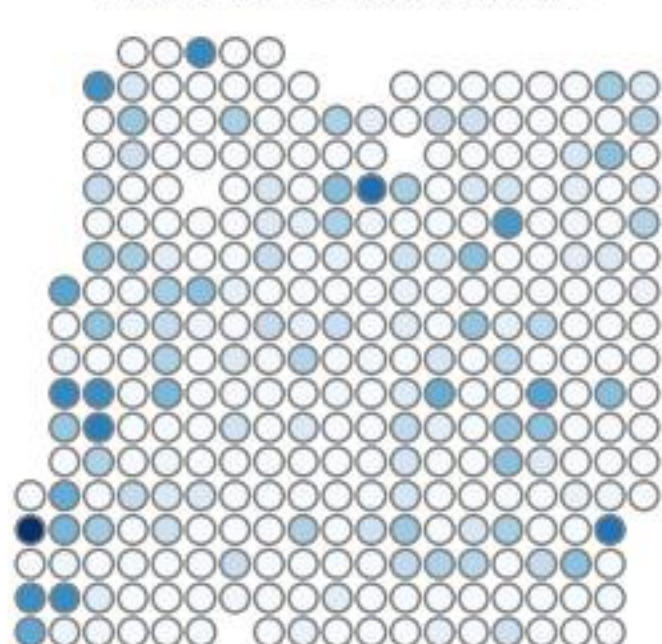

Cancer Epithelial

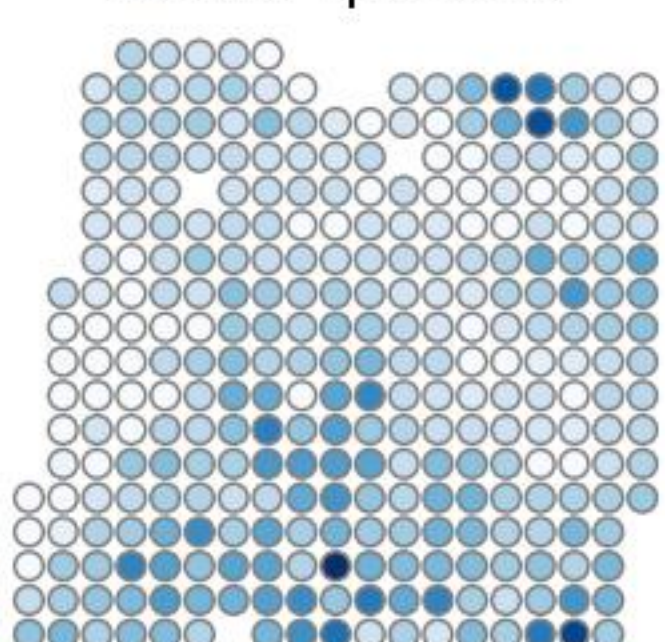

Normal Epithelial

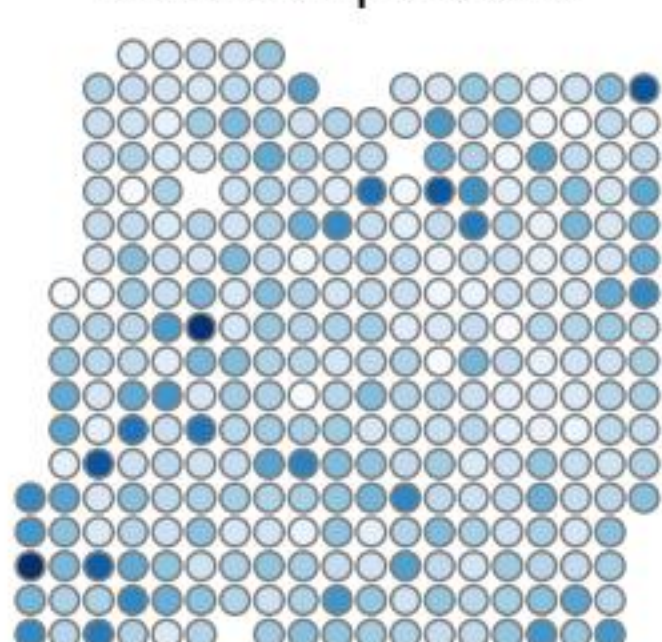

Cycling Myeloid

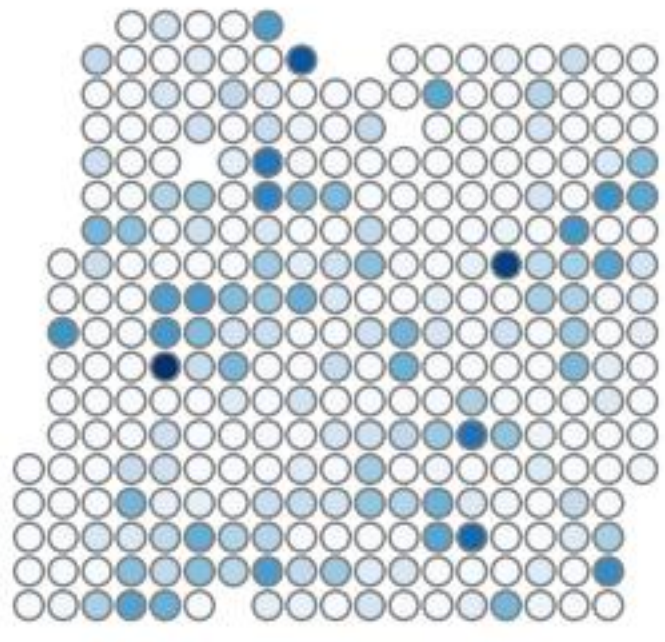

DCs

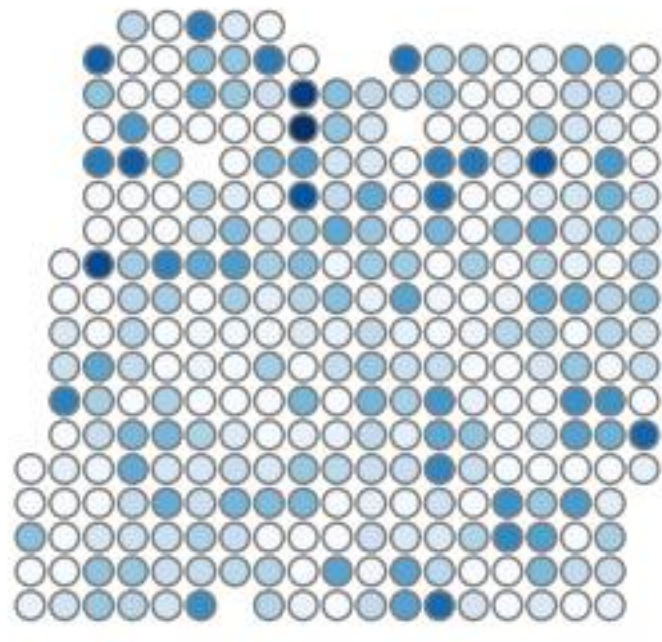

Macrophages

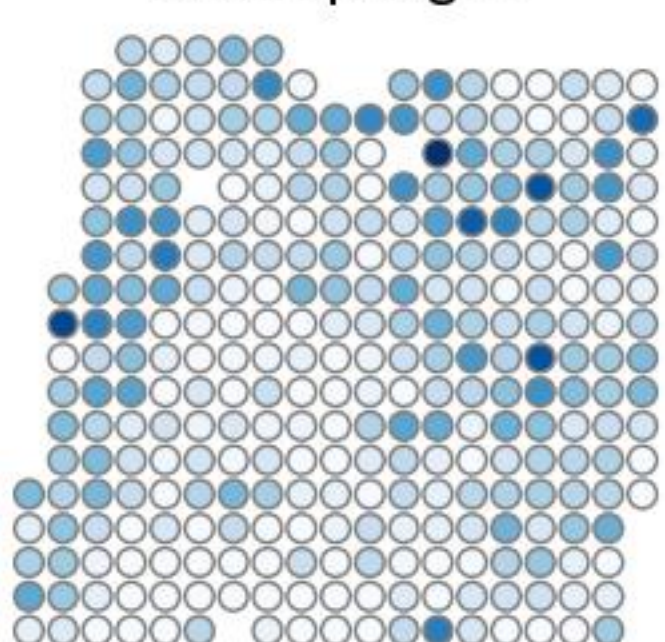

Monocytes

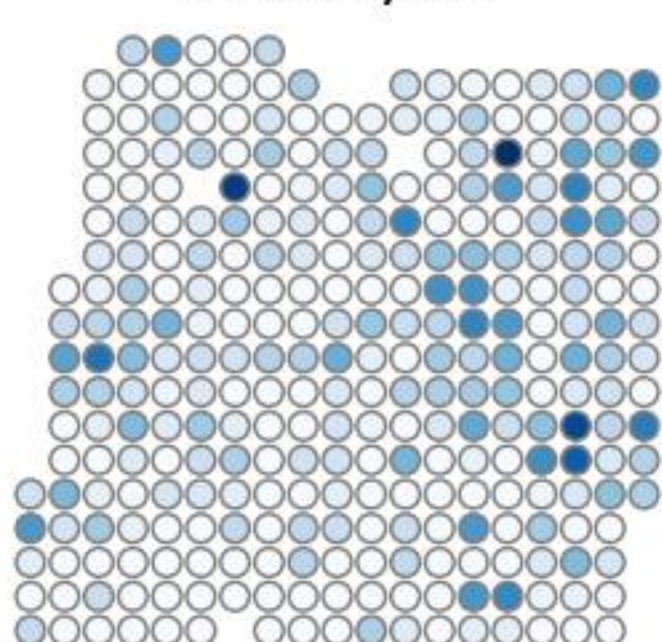

Plasma Cells

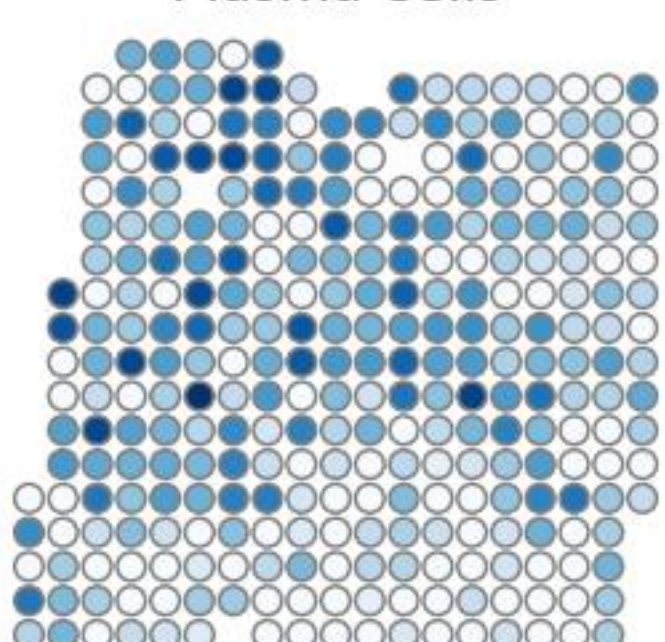

PVL Differentiated

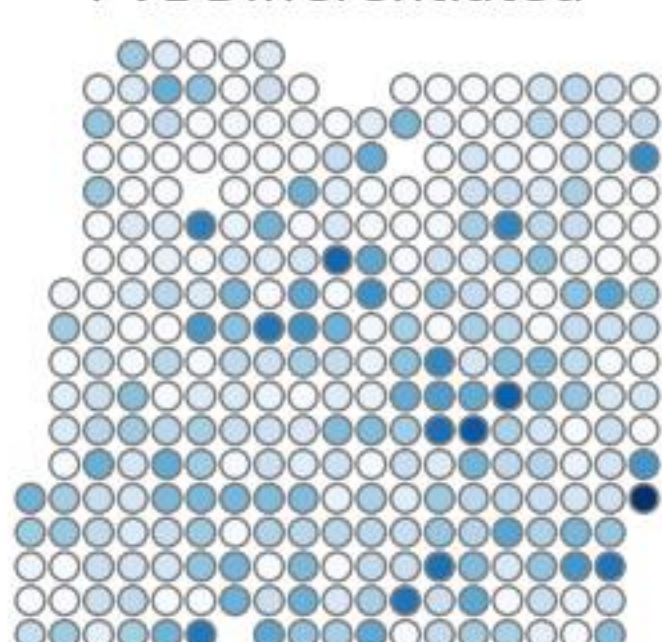

PVL Immature

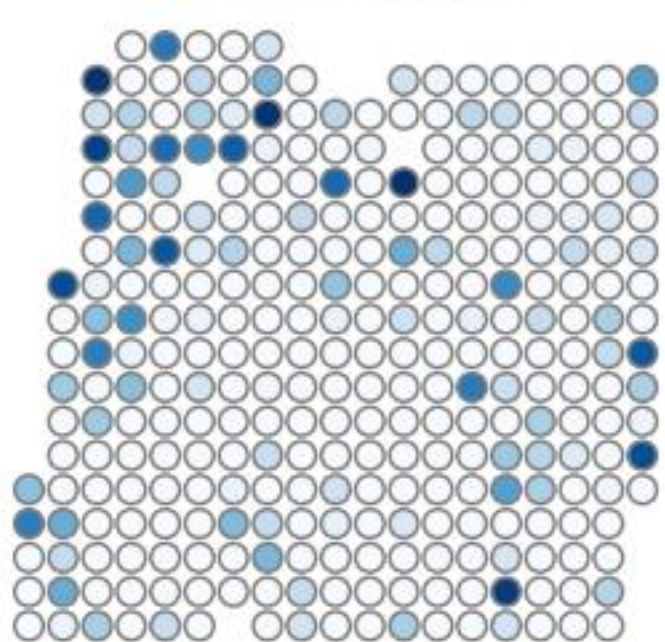

CD4+ T-cells

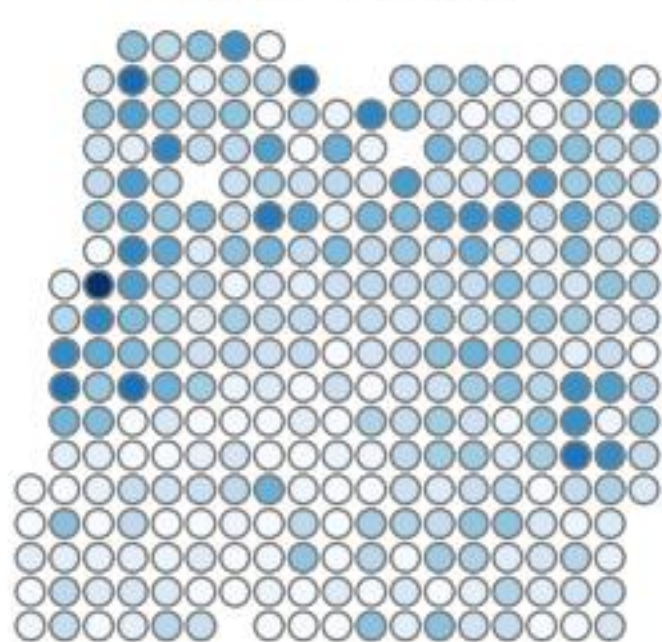

CD8+ T-cells

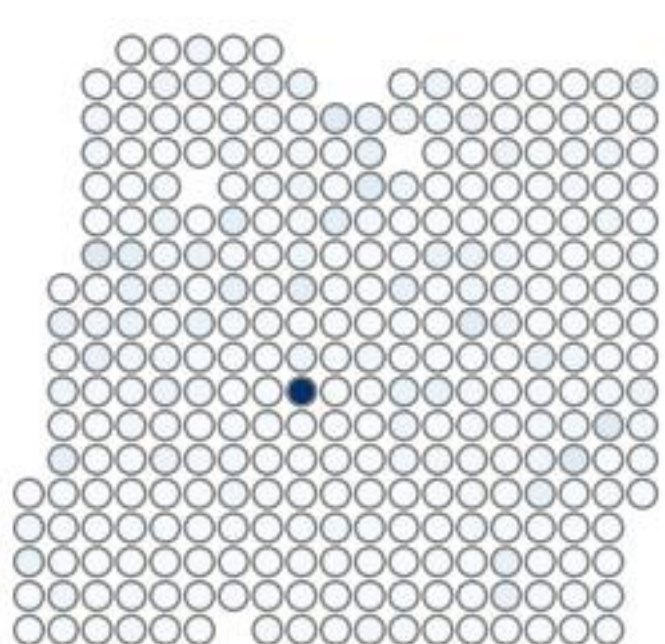

Cycling T-cells

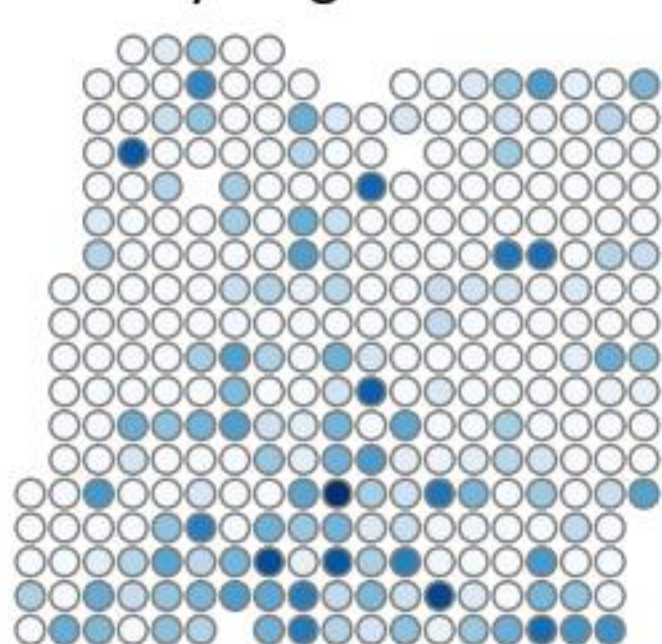

NK cells

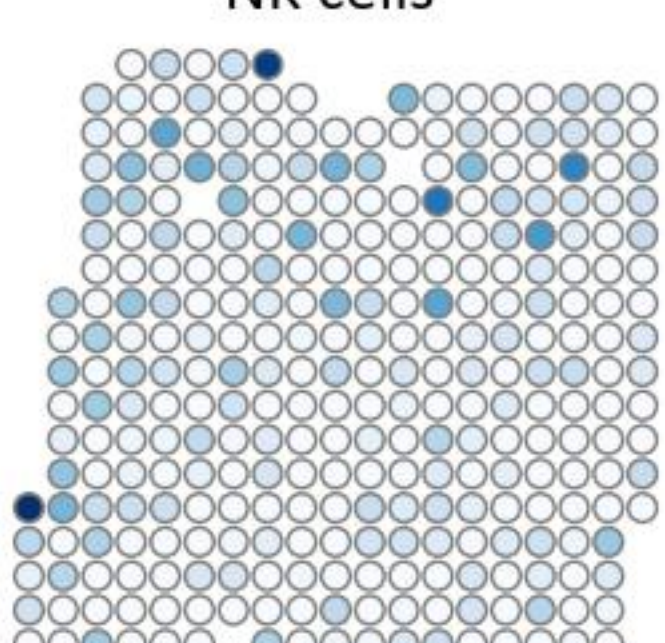

NKT cells

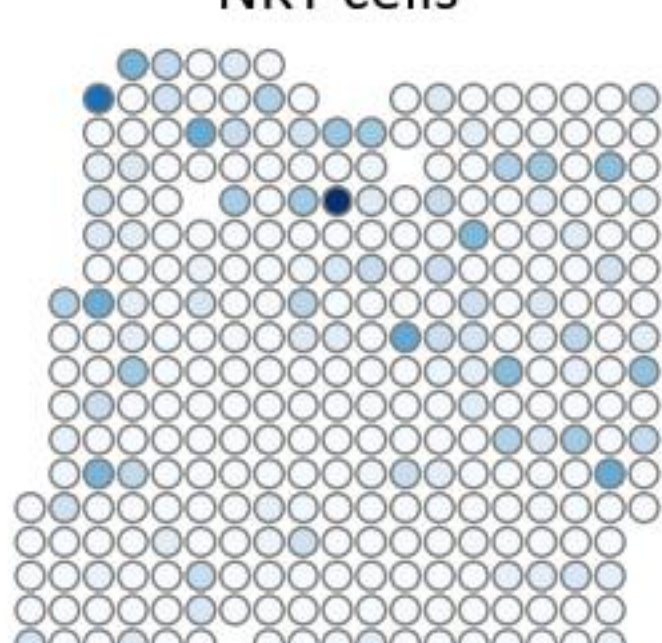

# minor\_C6

B-cells Memory

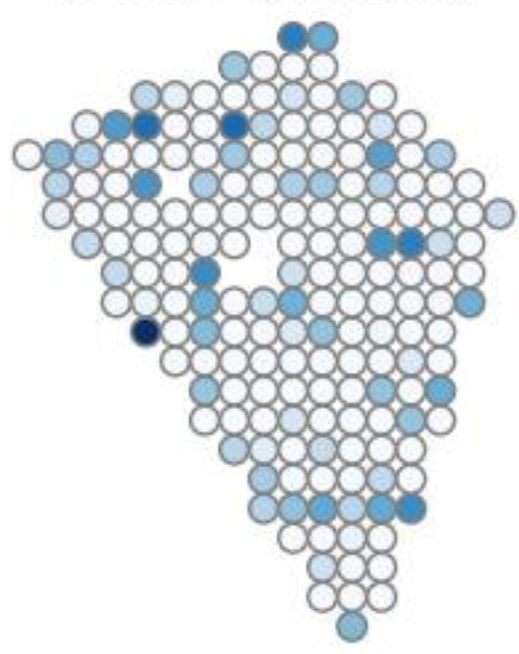

B-cells Naive

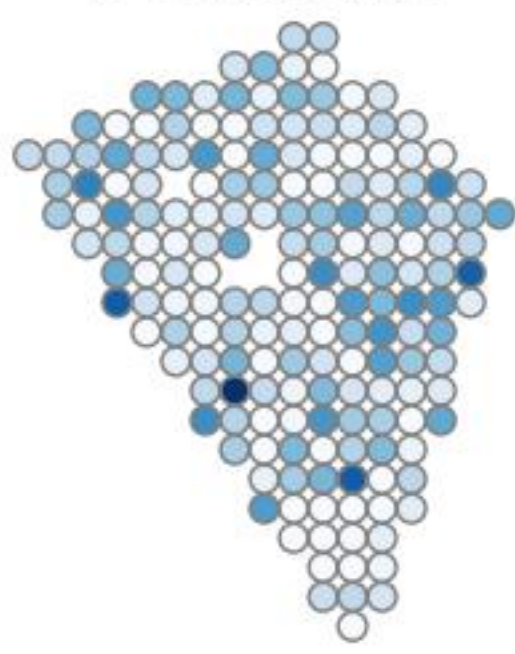

CAFs MSC/iCAF-like

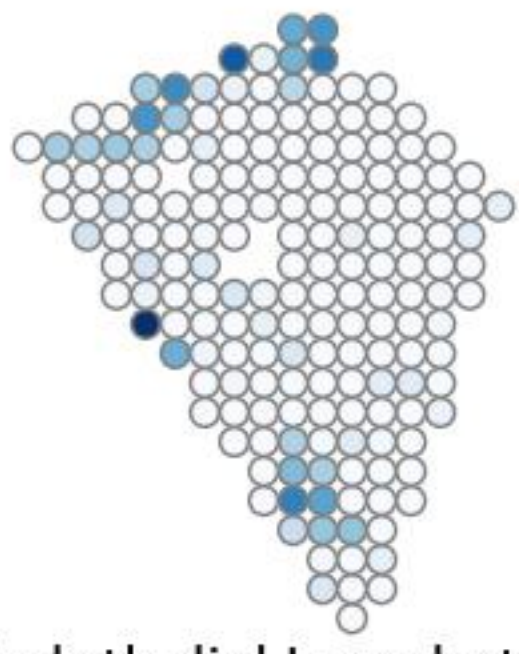

CAFs myCAF-like

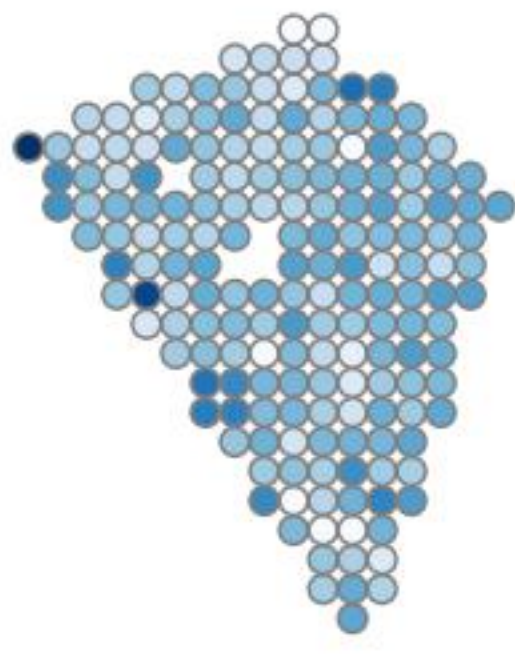

Endothelial Lymphatic  
LYVE1

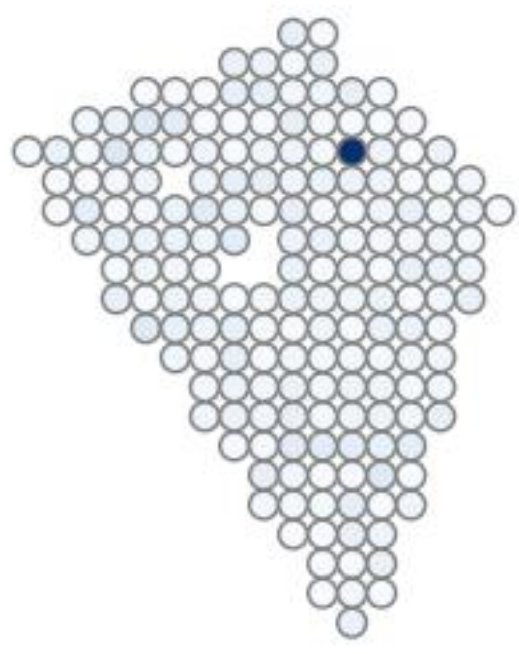

Endothelial RGS5

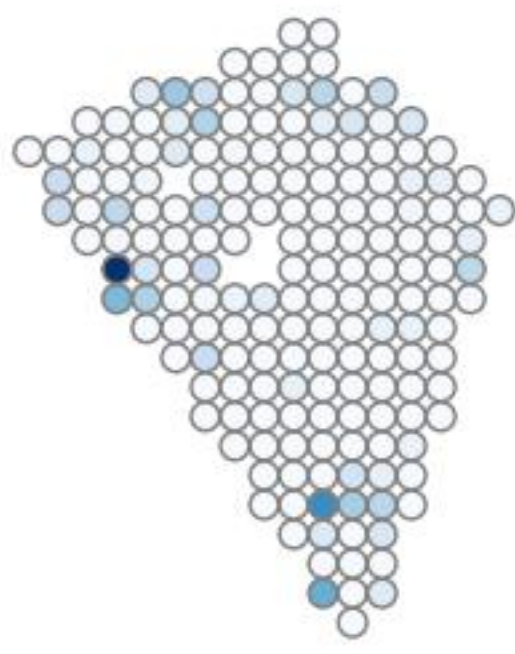

Endothelial CXCL12

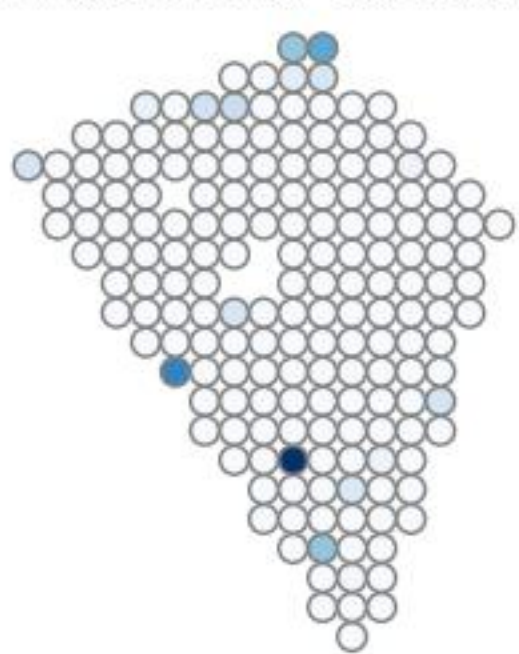

Endothelial ACKR1

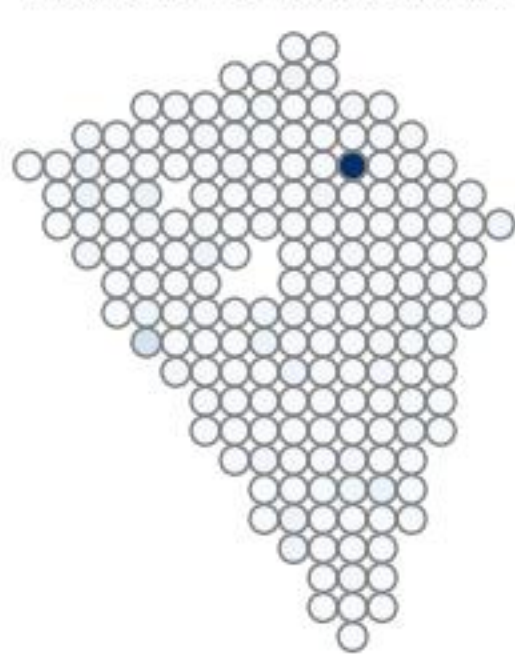

Cancer Epithelial

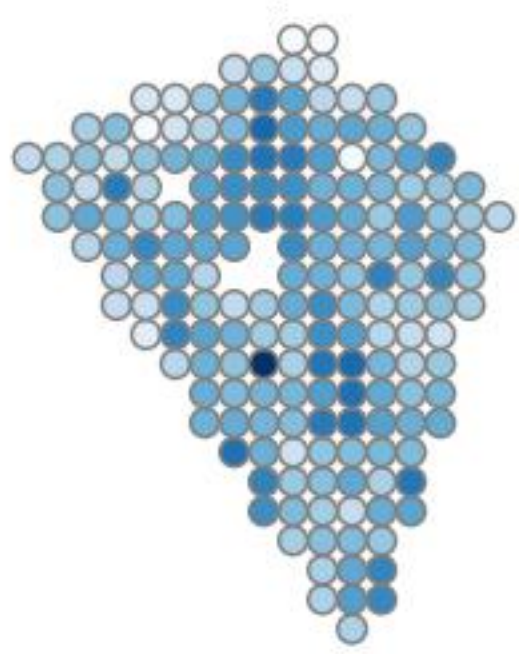

Normal Epithelial

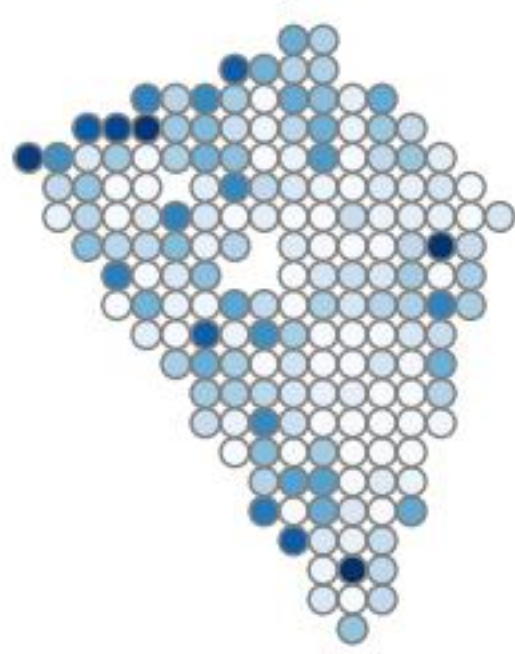

Cycling Myeloid

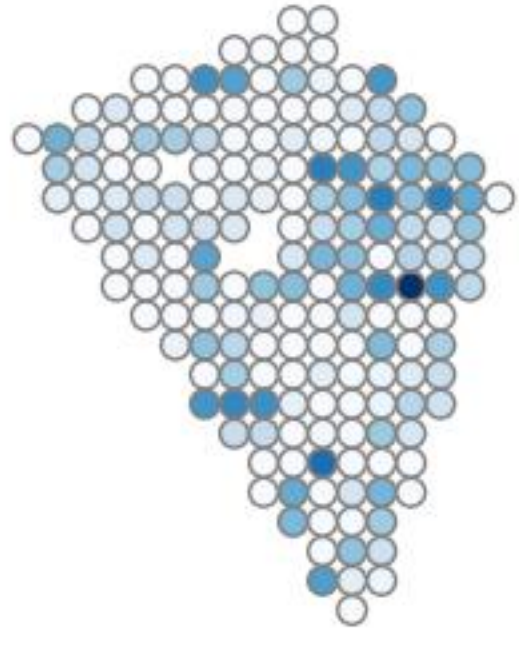

DCs

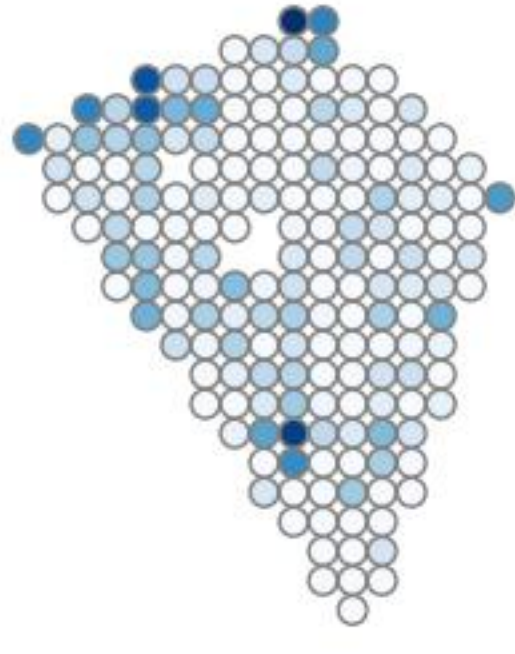

Macrophages

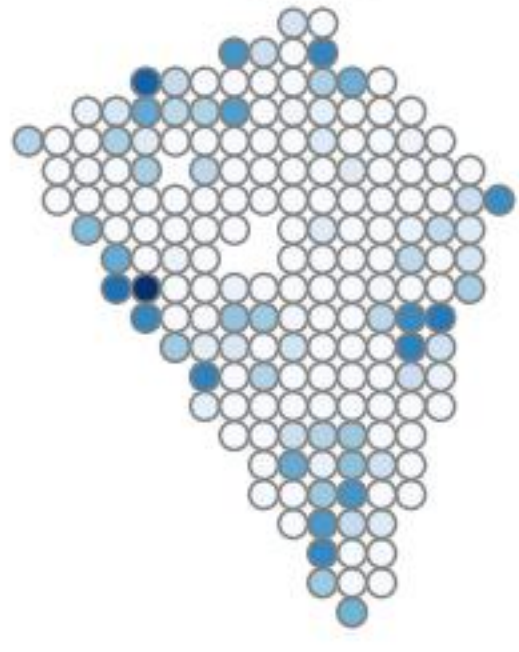

Monocytes

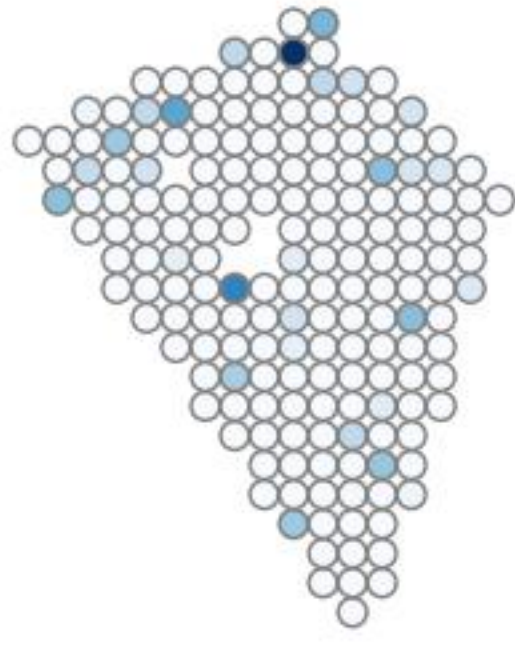

Plasma Cells

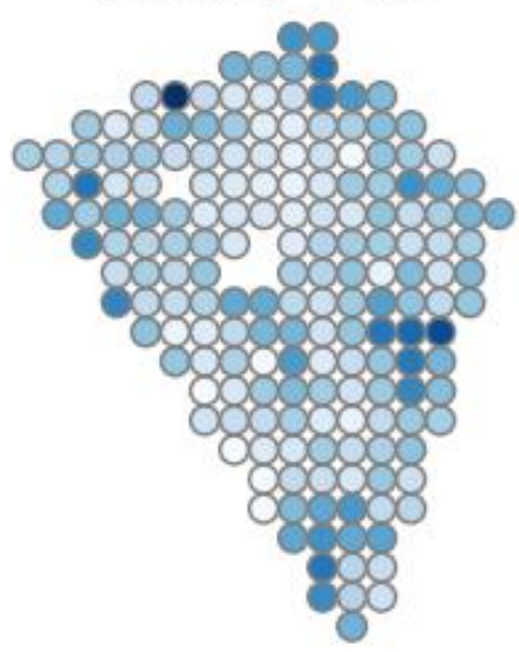

PVL Differentiated

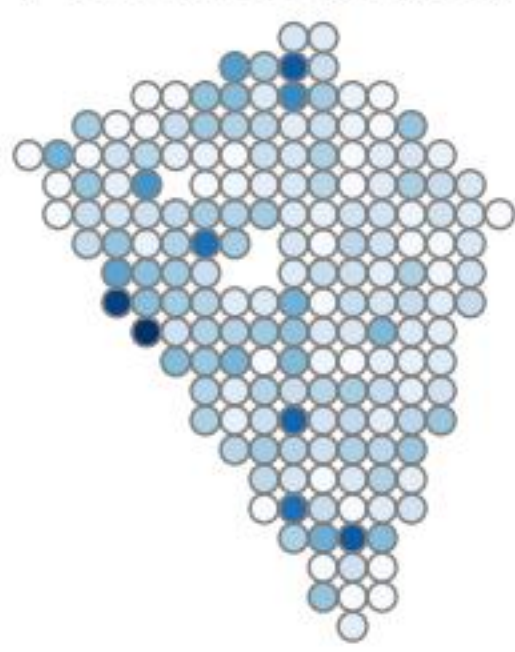

PVL Immature

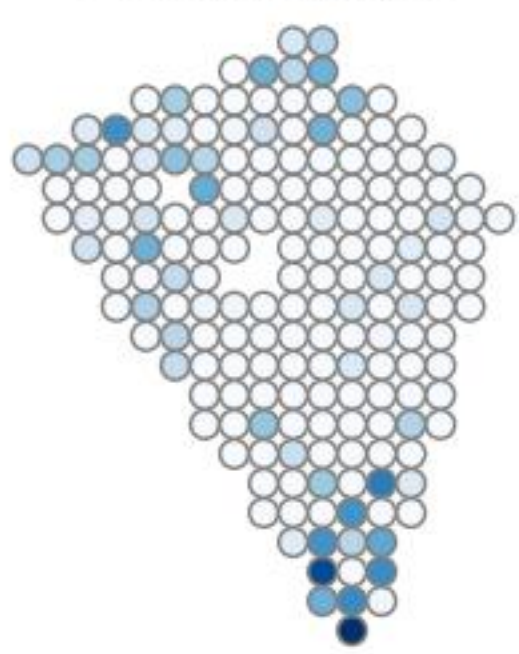

CD4+ T-cells

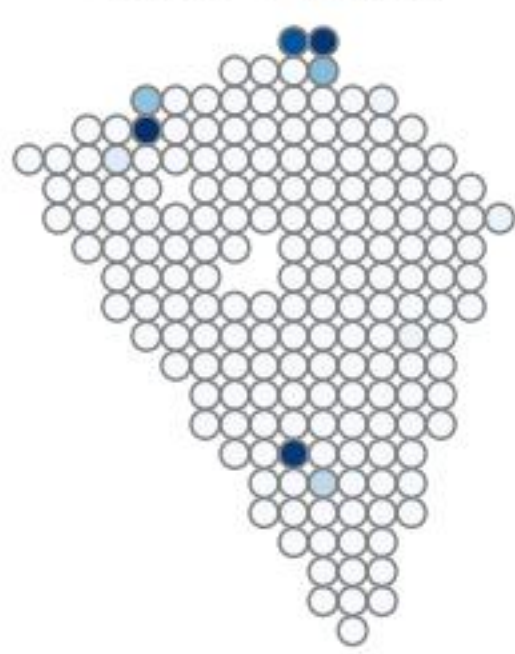

CD8+ T-cells

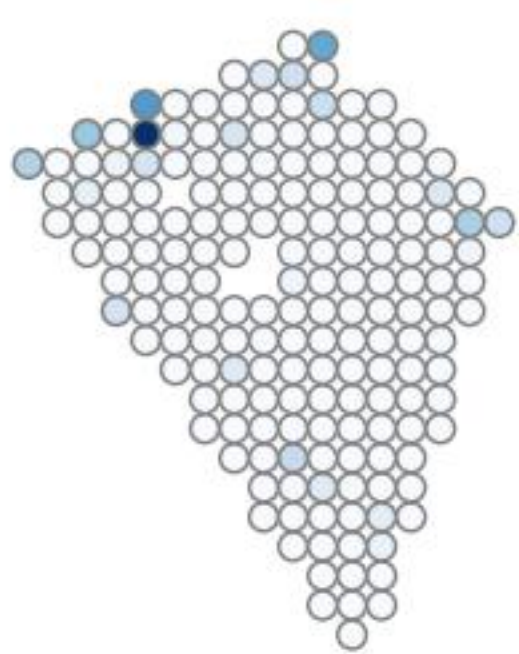

Cycling T-cells

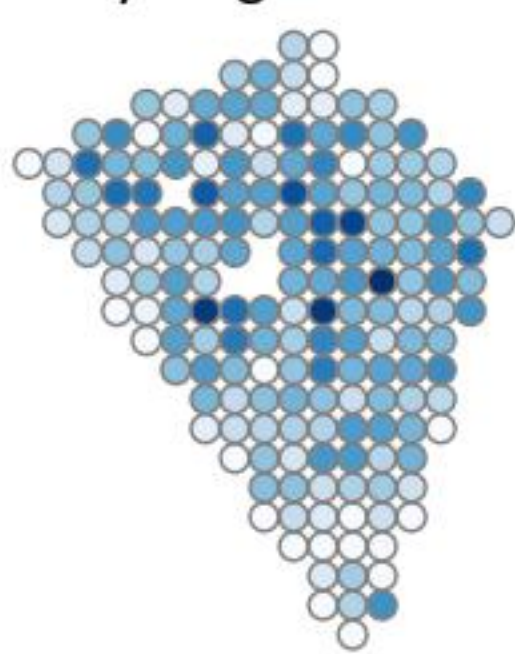

NK cells

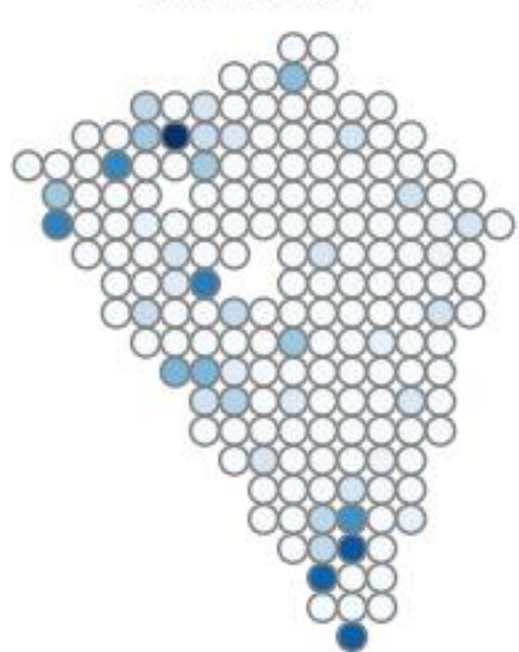

NKT cells

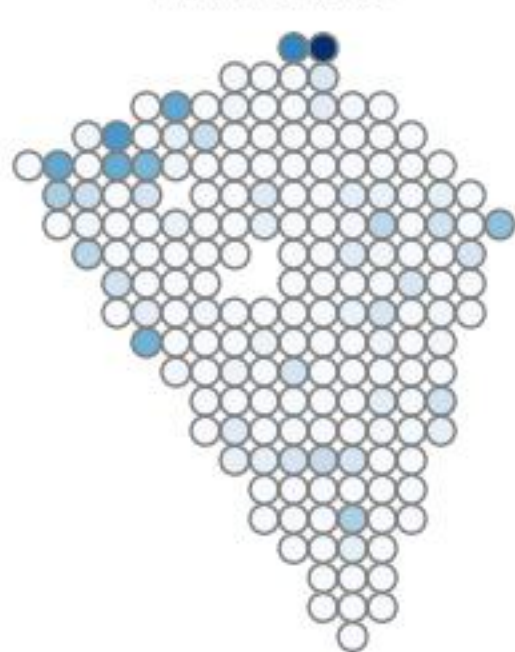

# minor\_B5

B-cells Memory

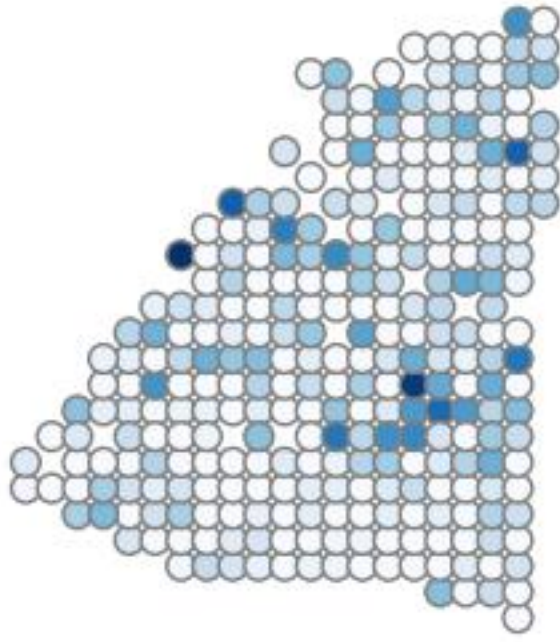

B-cells Naive

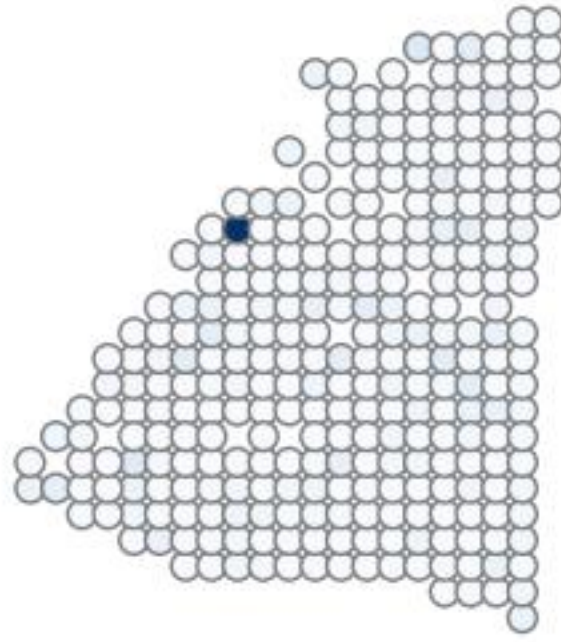

CAFs MSC/iCAF-like

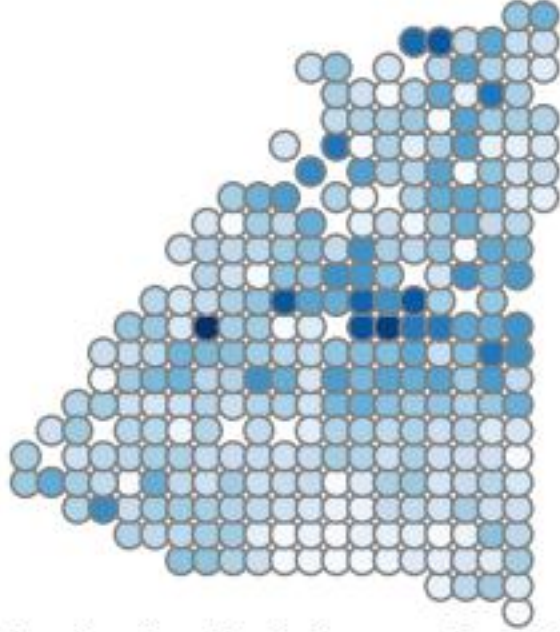

CAFs myCAF-like

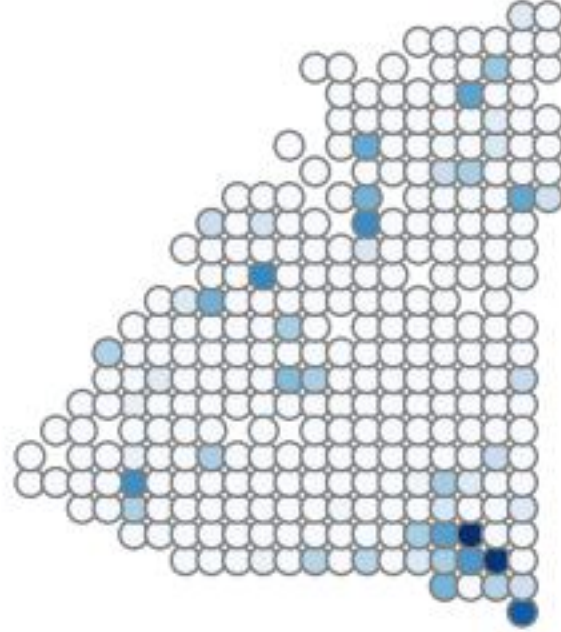

Endothelial Lymphatic  
LYVE1

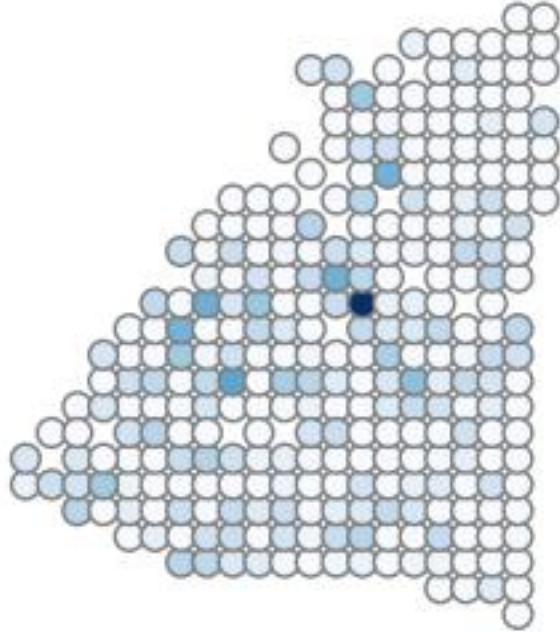

Endothelial RGS5

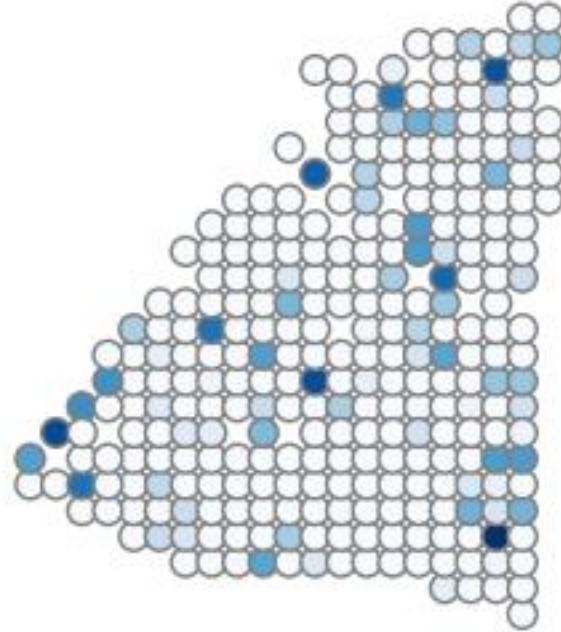

Endothelial CXCL12

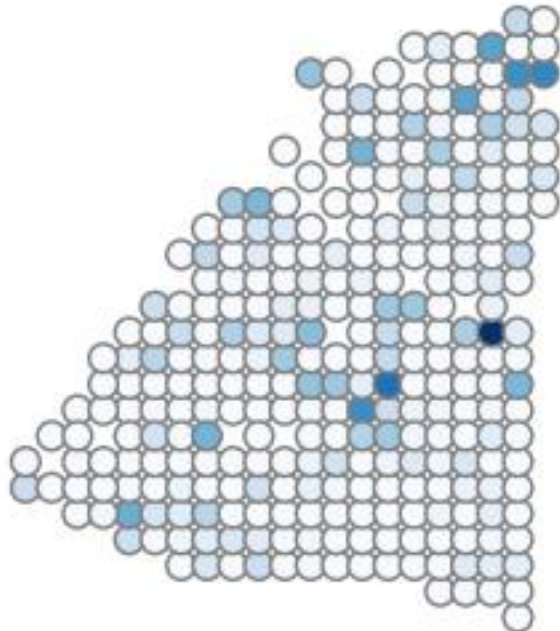

Endothelial ACKR1

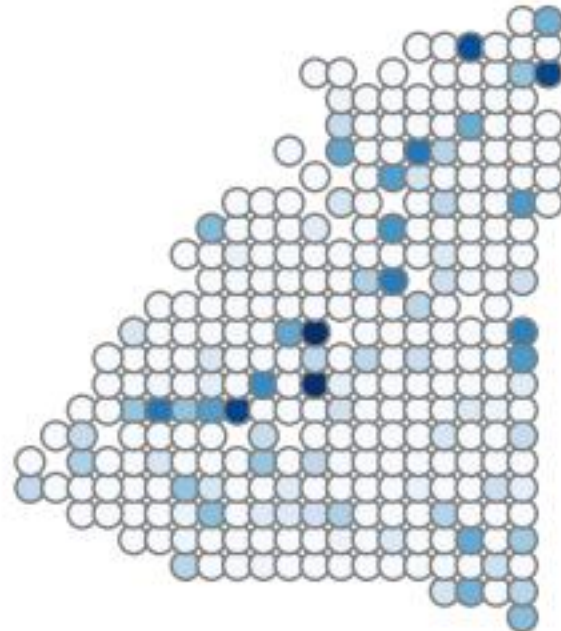

Cancer Epithelial

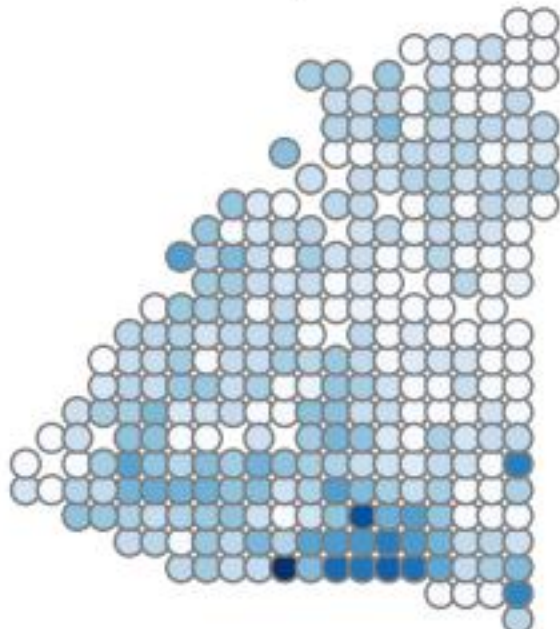

Normal Epithelial

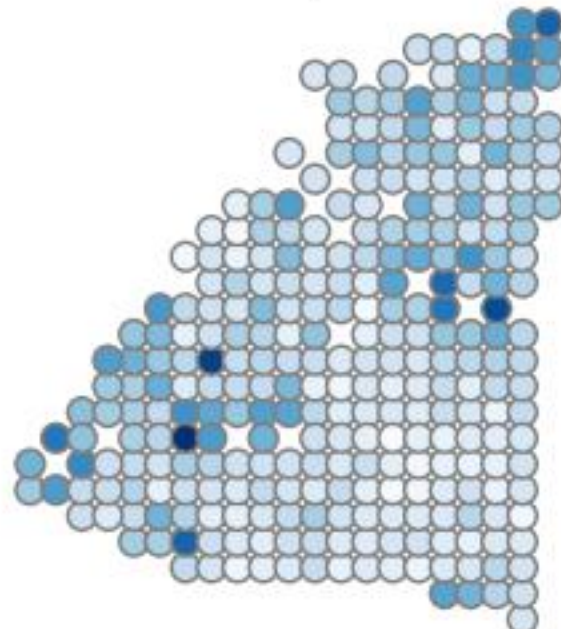

Cycling Myeloid

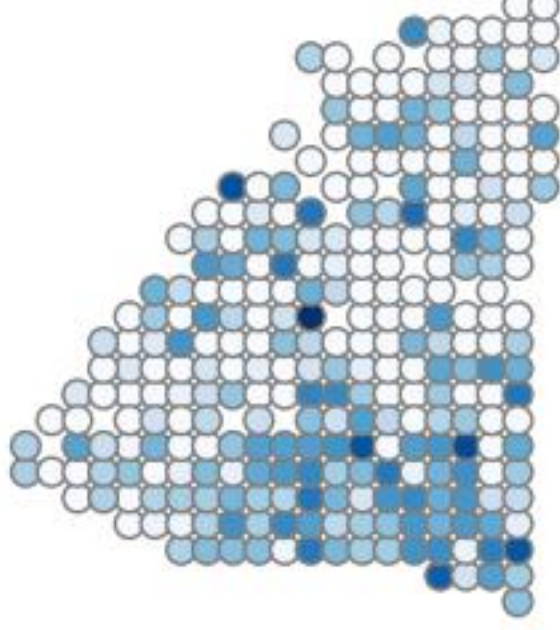

DCs

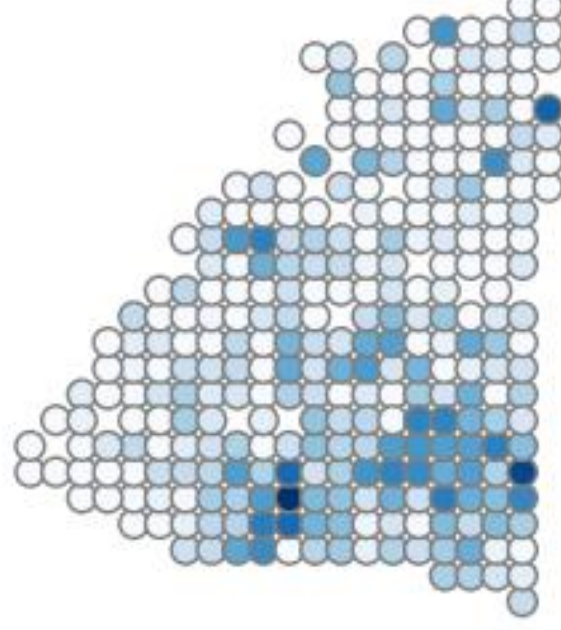

Macrophages

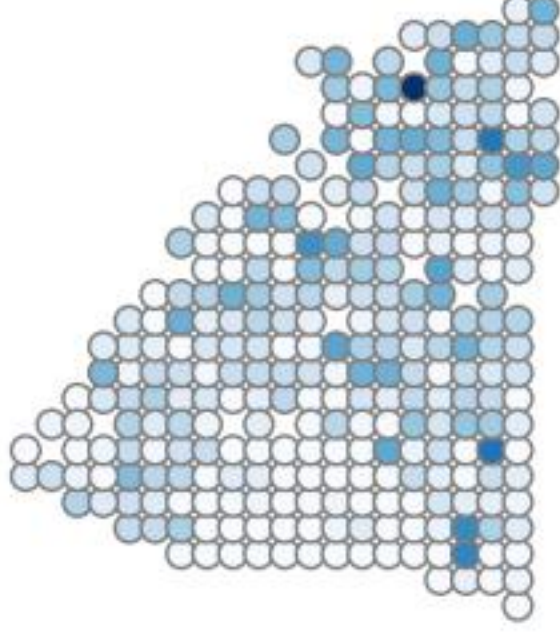

Monocytes

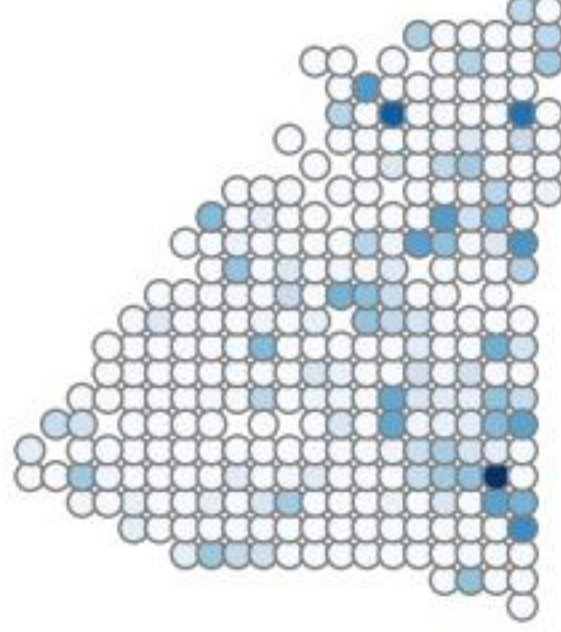

Plasma Cells

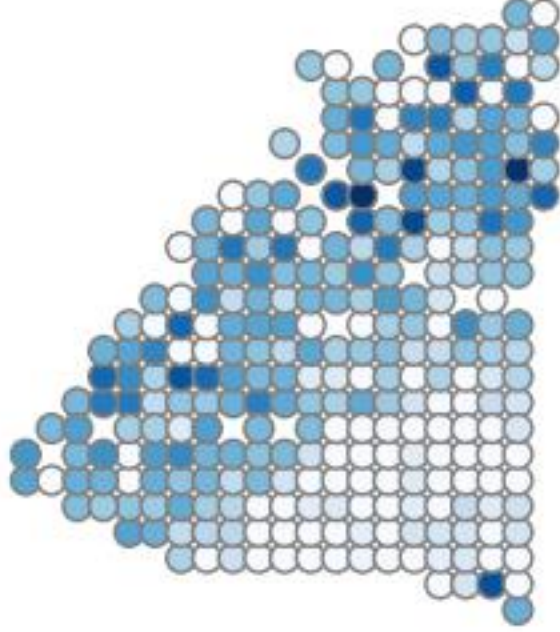

PVL Differentiated

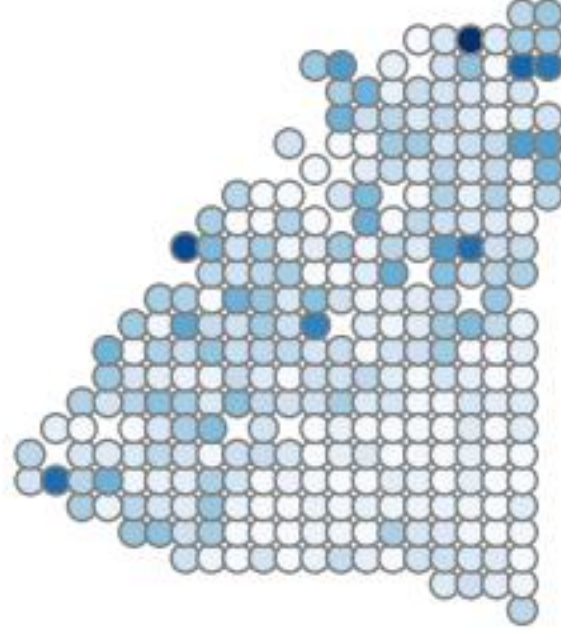

PVL Immature

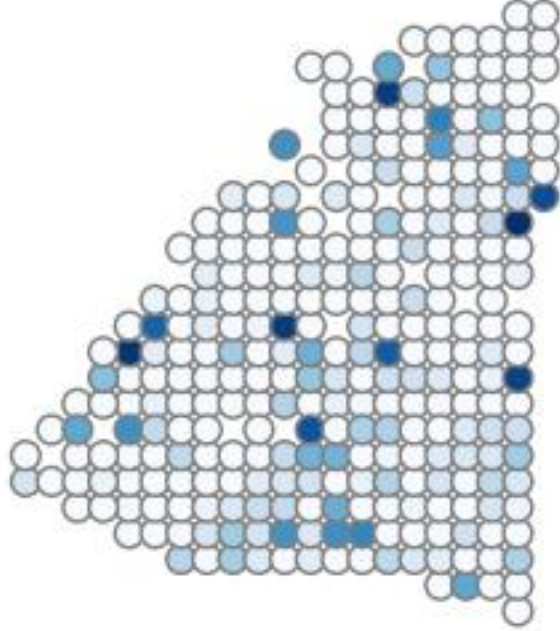

CD4+ T-cells

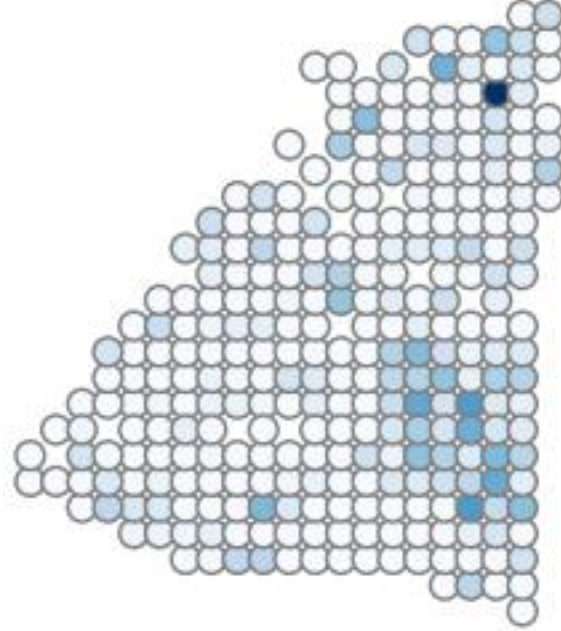

CD8+ T-cells

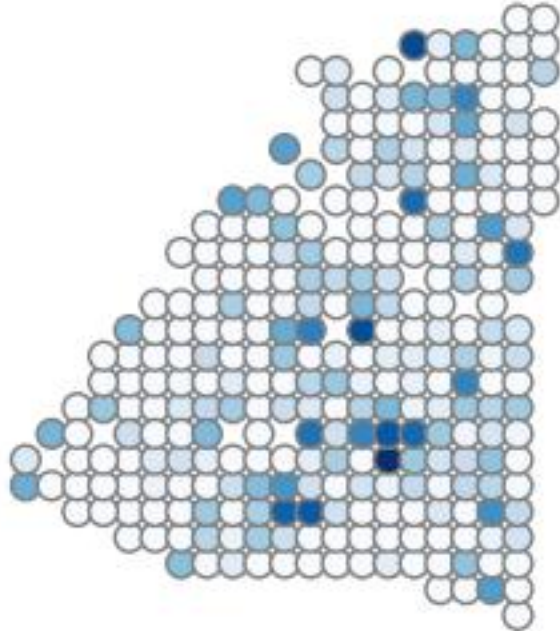

Cycling T-cells

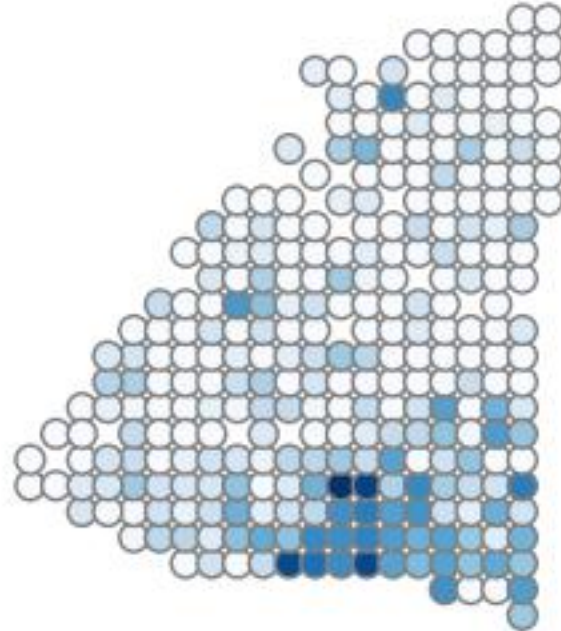

NK cells

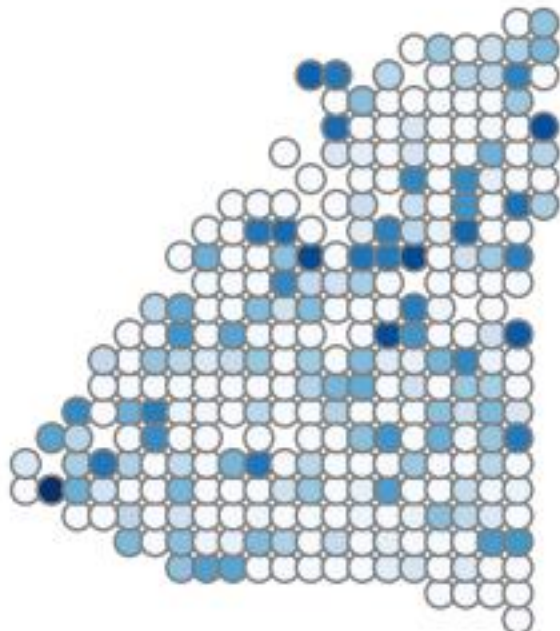

NKT cells

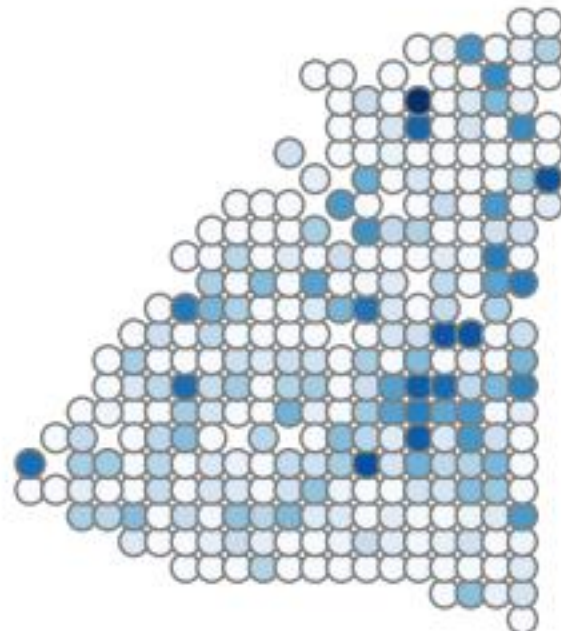

# minor\_E3

B-cells Memory

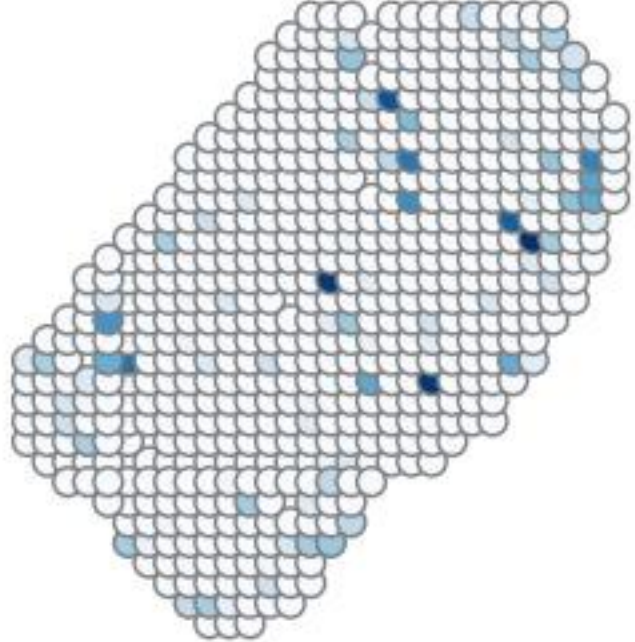

B-cells Naive

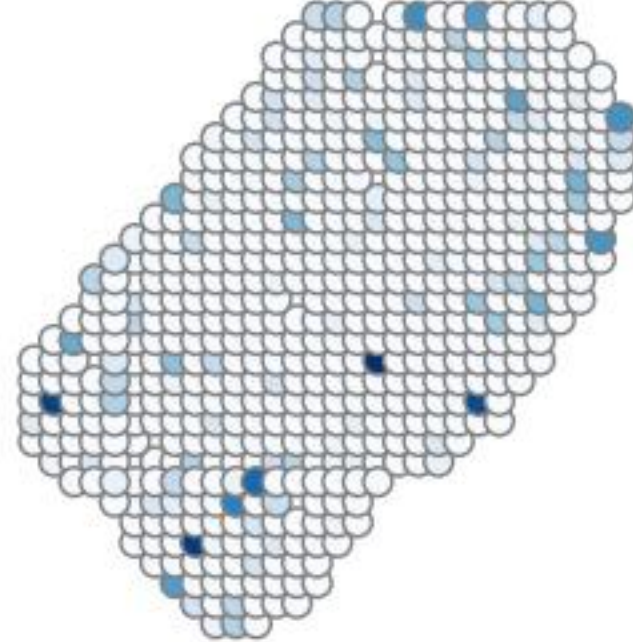

CAFs MSC/iCAF-like

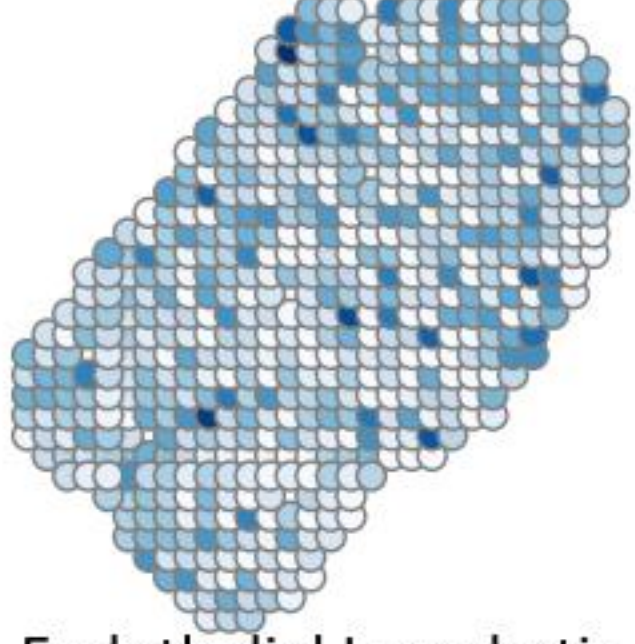

CAFs myCAF-like

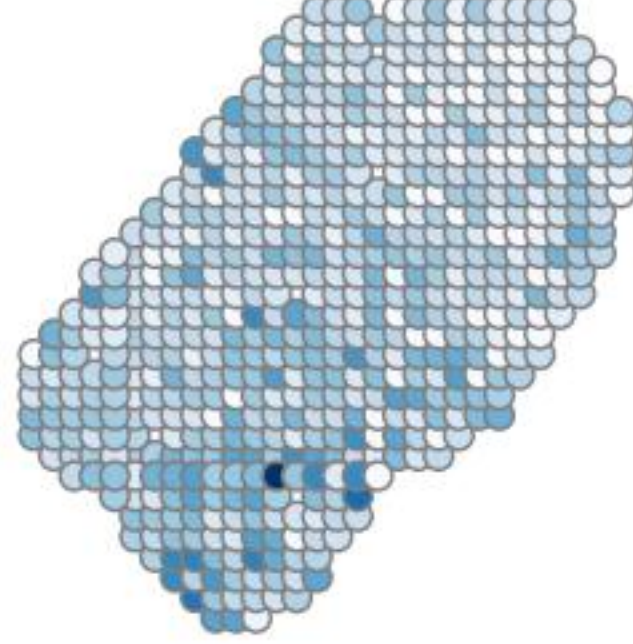

Endothelial Lymphatic  
LYVE1

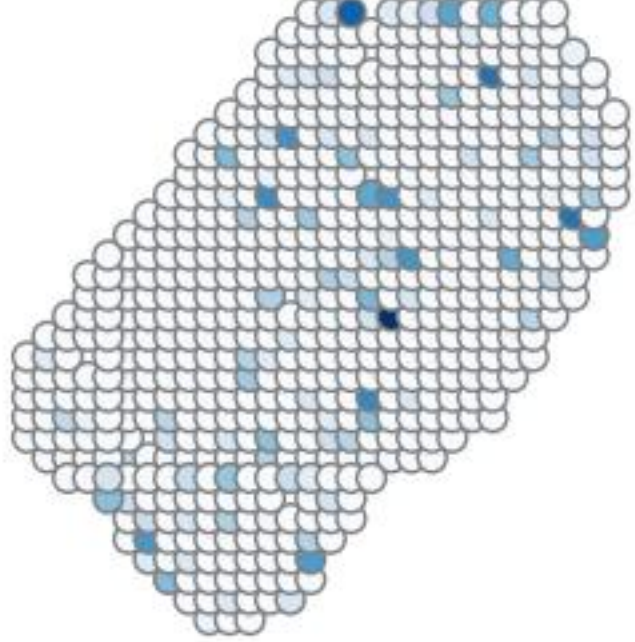

Endothelial RGS5

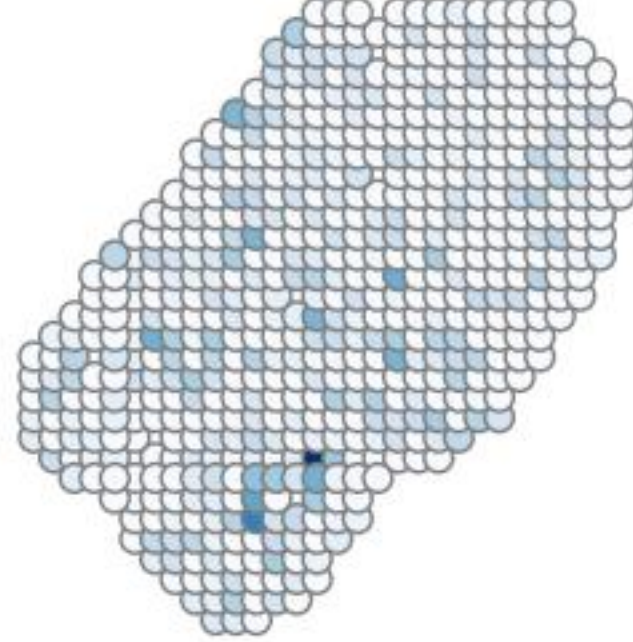

Endothelial CXCL12

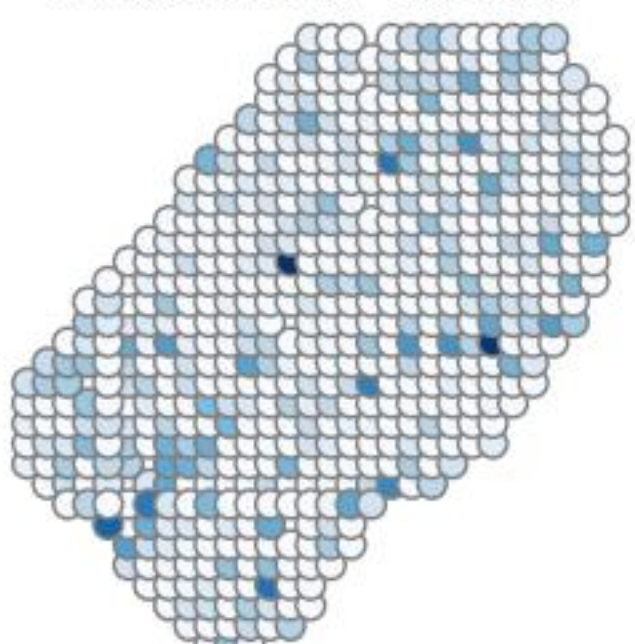

Endothelial ACKR1

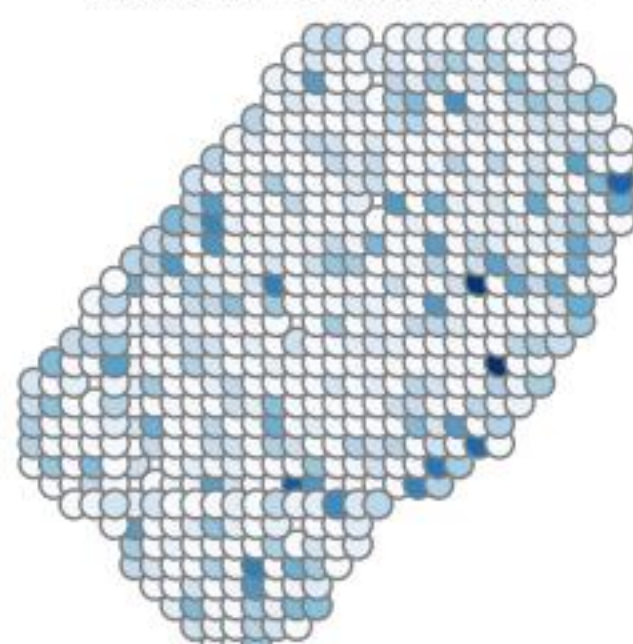

Cancer Epithelial

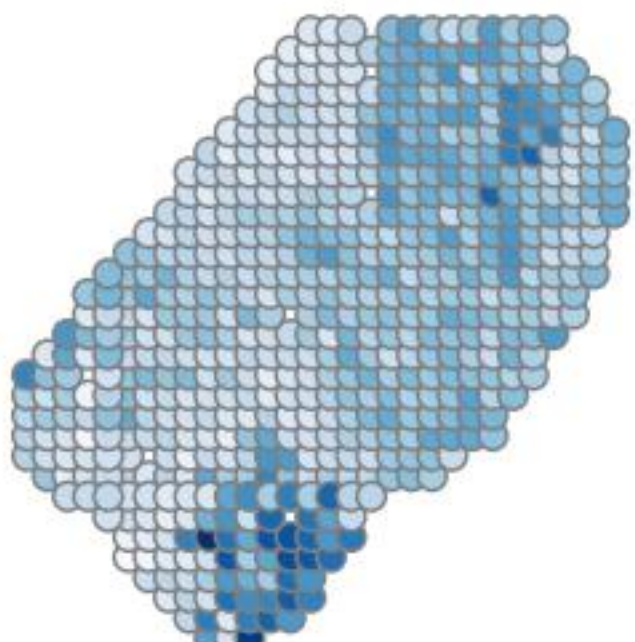

Normal Epithelial

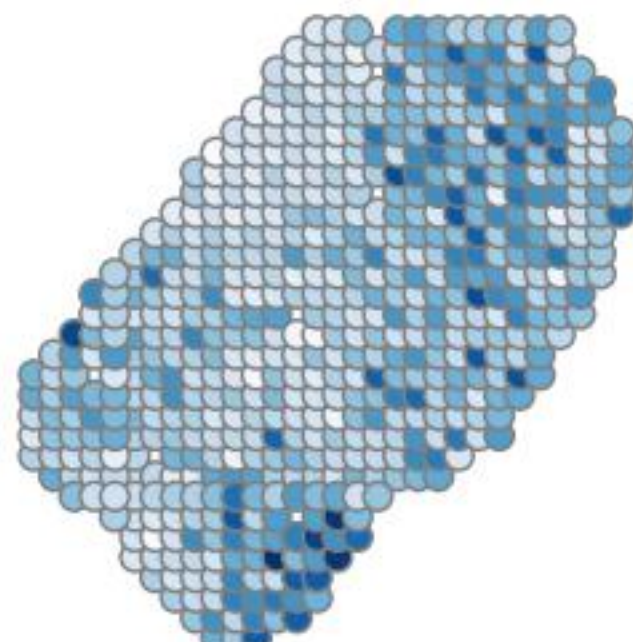

Cycling Myeloid

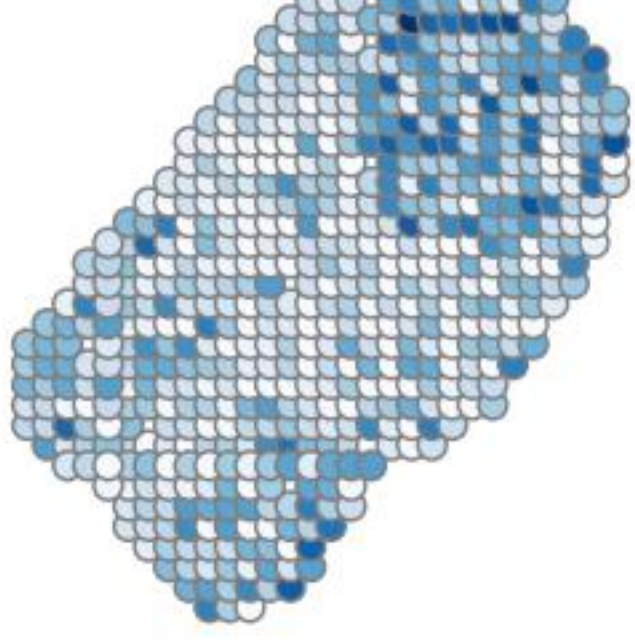

DCs

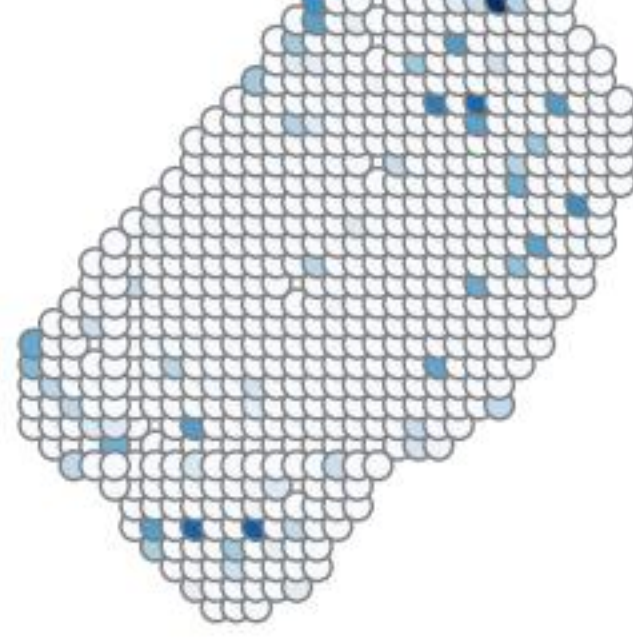

Macrophages

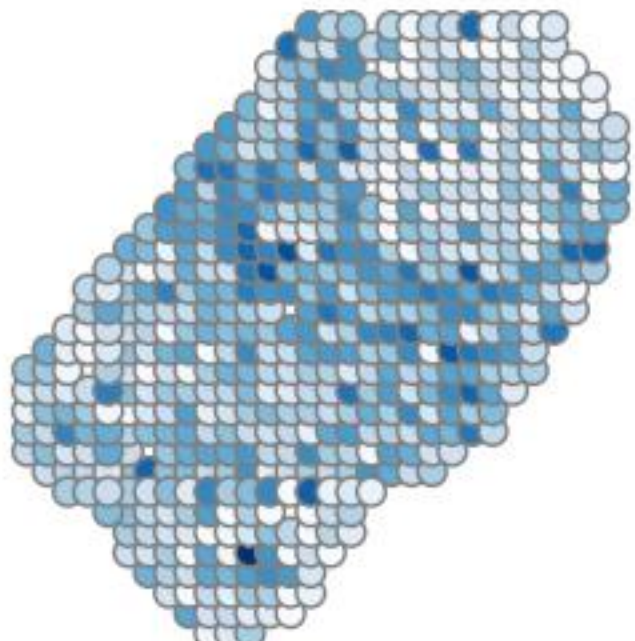

Monocytes

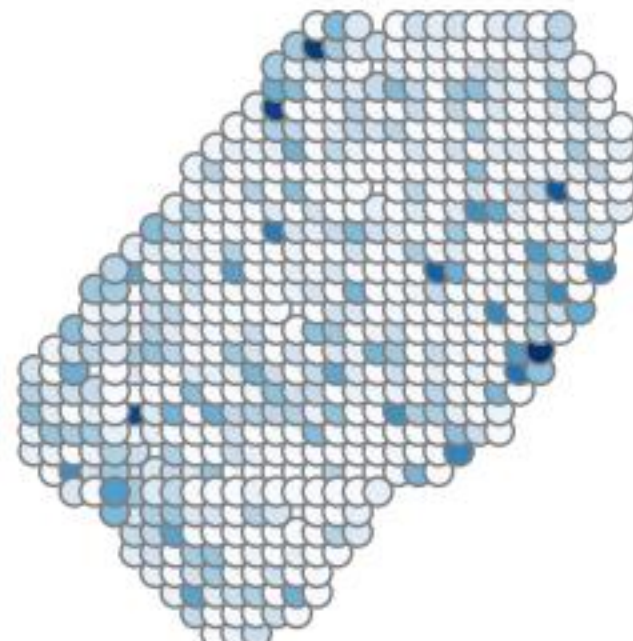

Plasma Cells

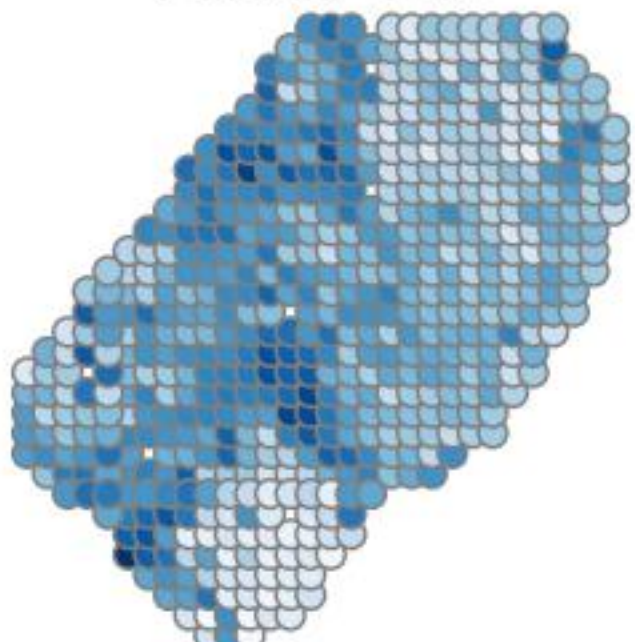

PVL Differentiated

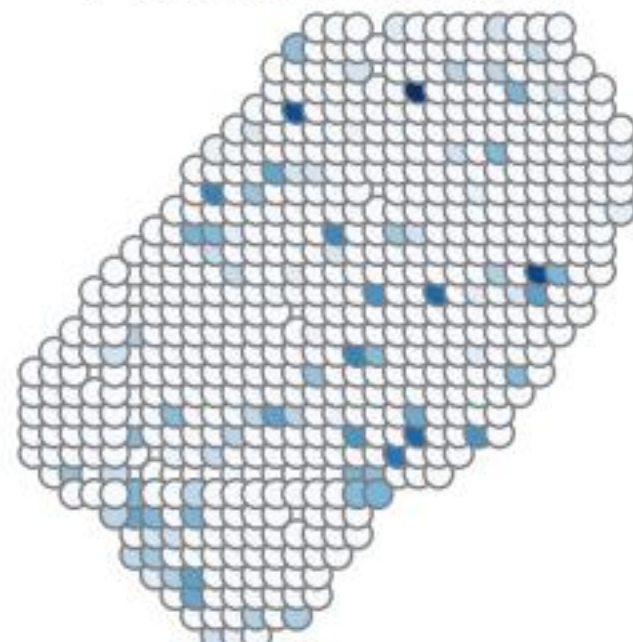

PVL Immature

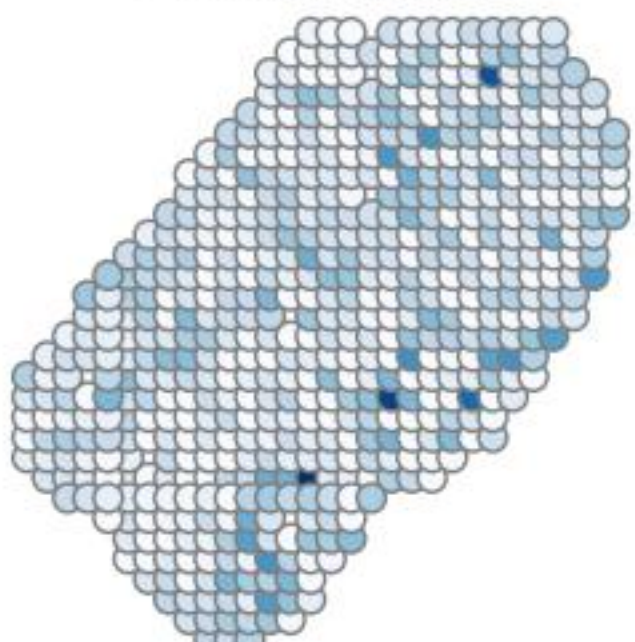

CD4+ T-cells

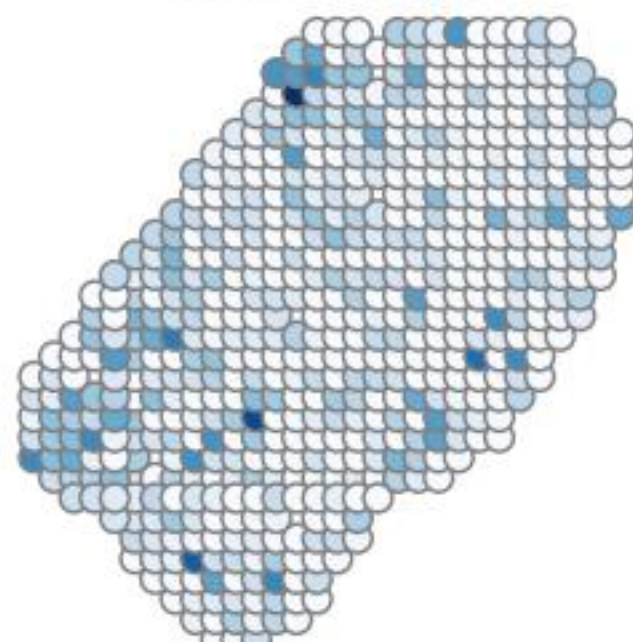

CD8+ T-cells

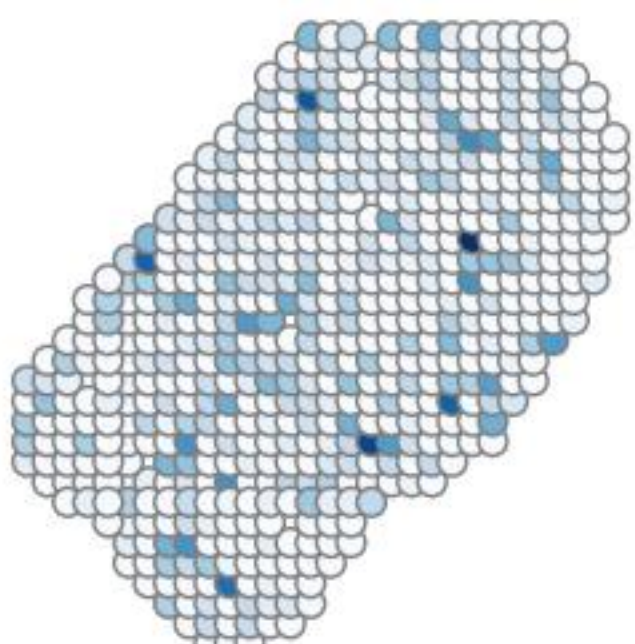

Cycling T-cells

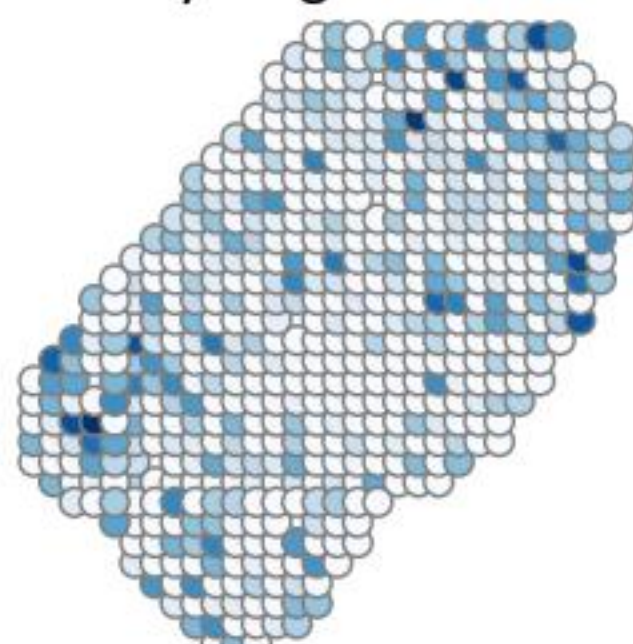

NK cells

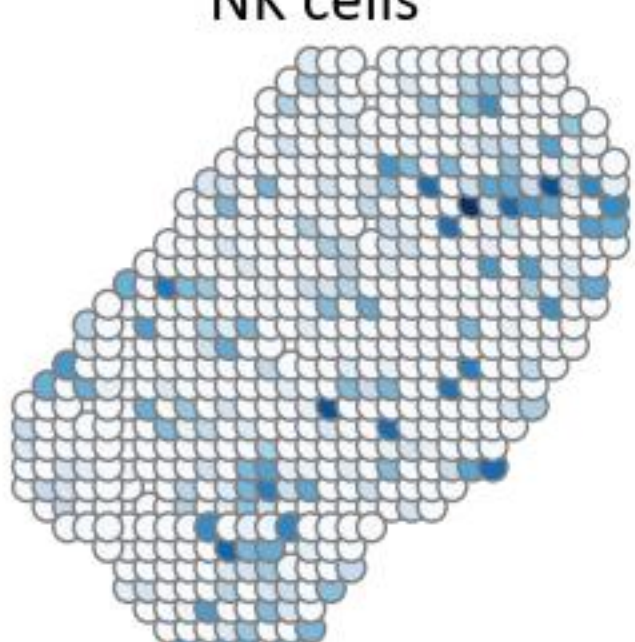

NKT cells

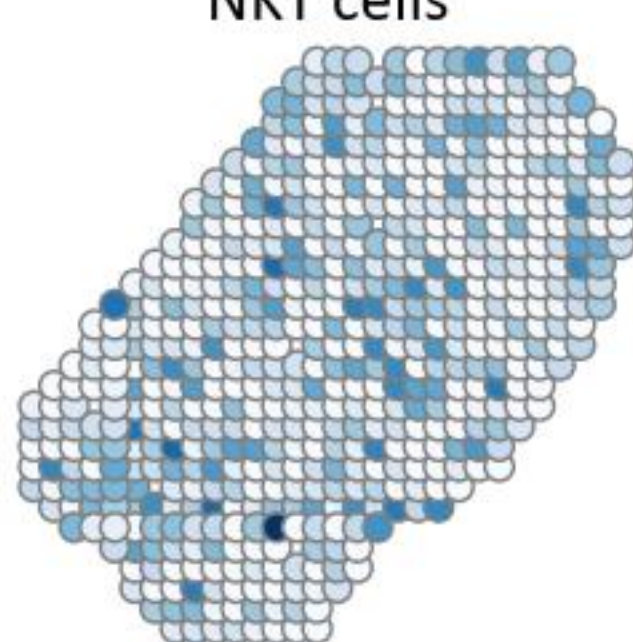

# minor\_H3

B-cells Memory

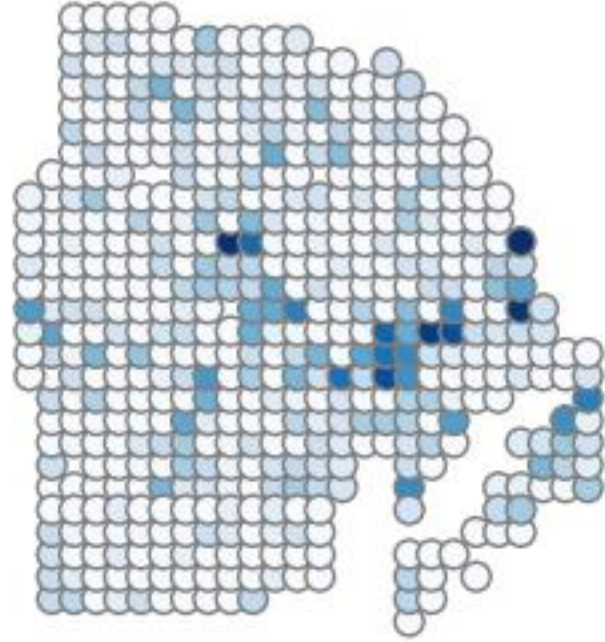

B-cells Naive

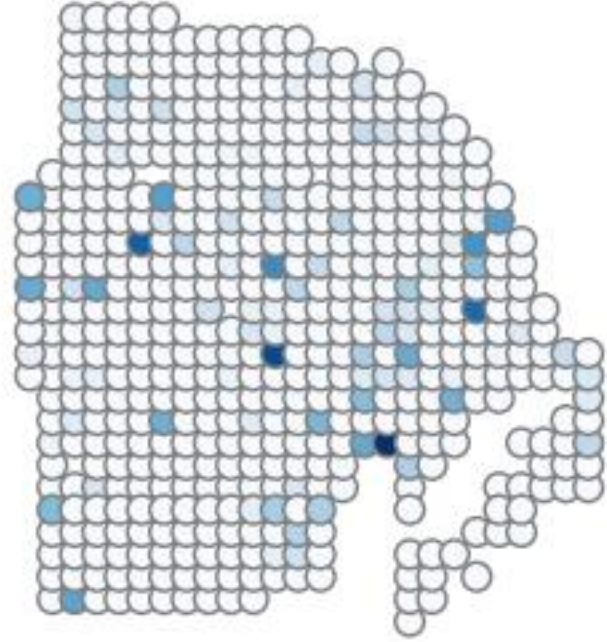

CAFs MSC/iCAF-like

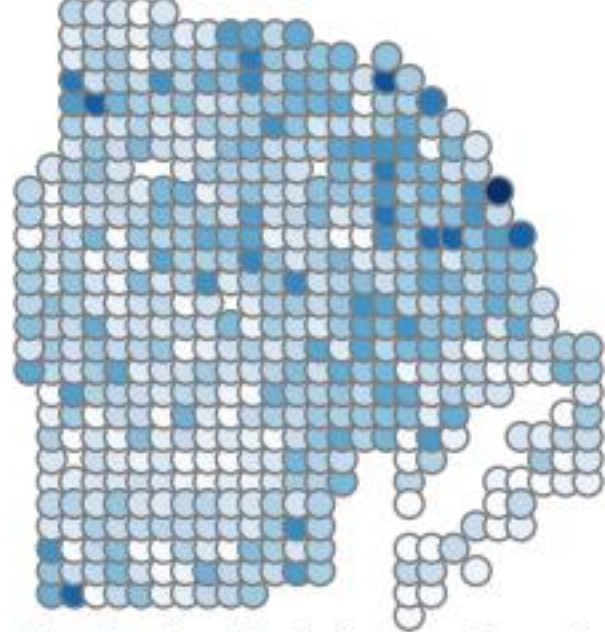

CAFs myCAF-like

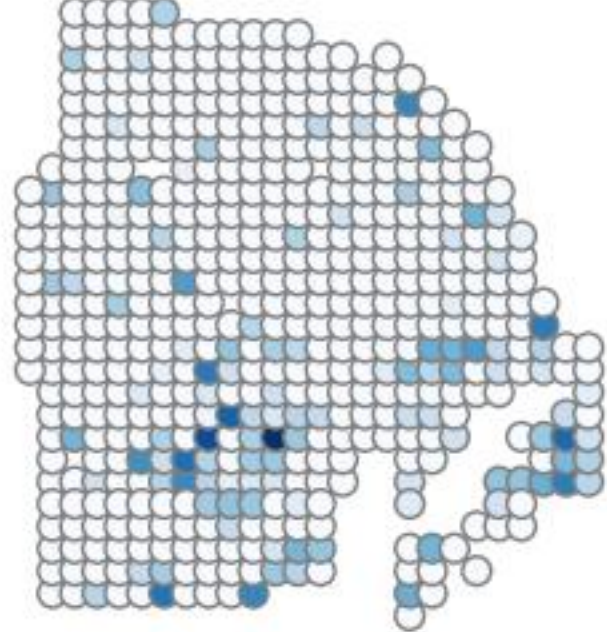

Endothelial Lymphatic  
LYVE1

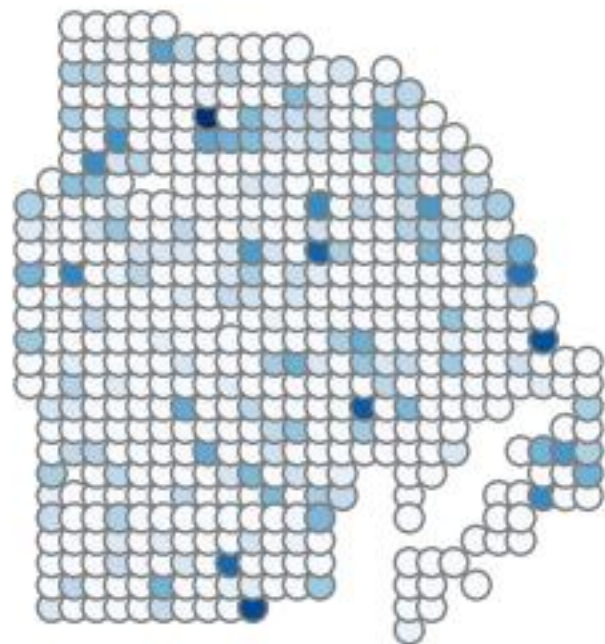

Endothelial RGS5

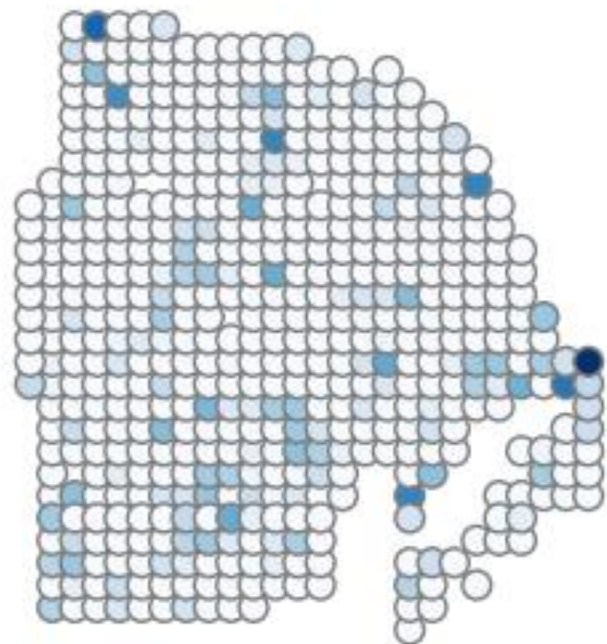

Endothelial CXCL12

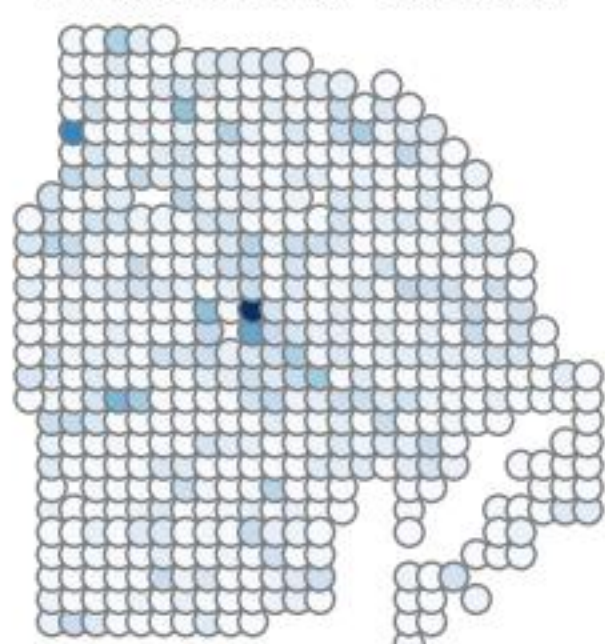

Endothelial ACKR1

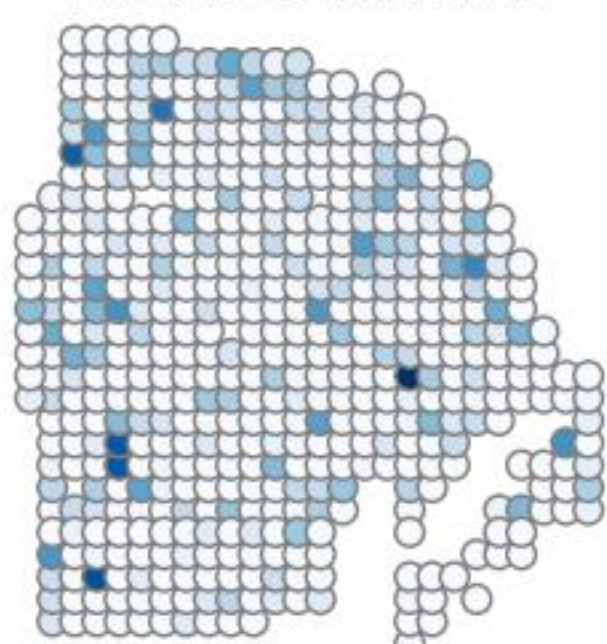

Cancer Epithelial

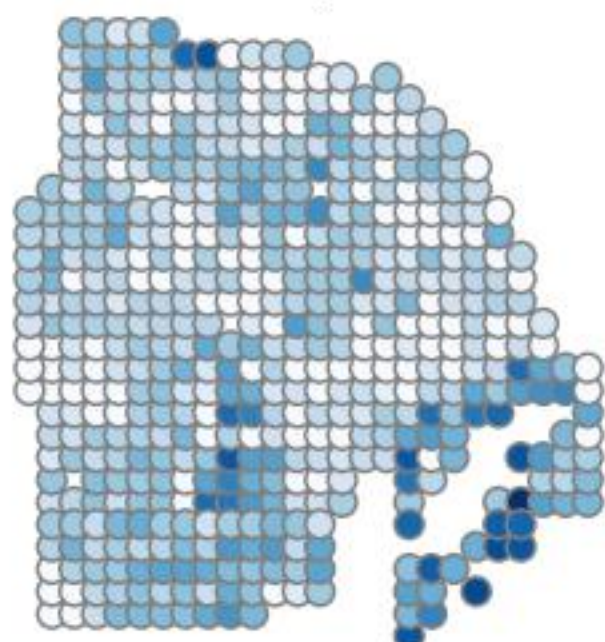

Normal Epithelial

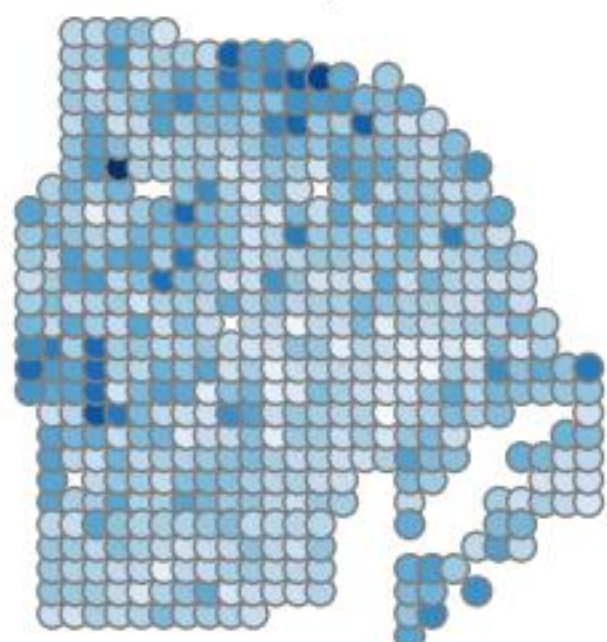

Cycling Myeloid

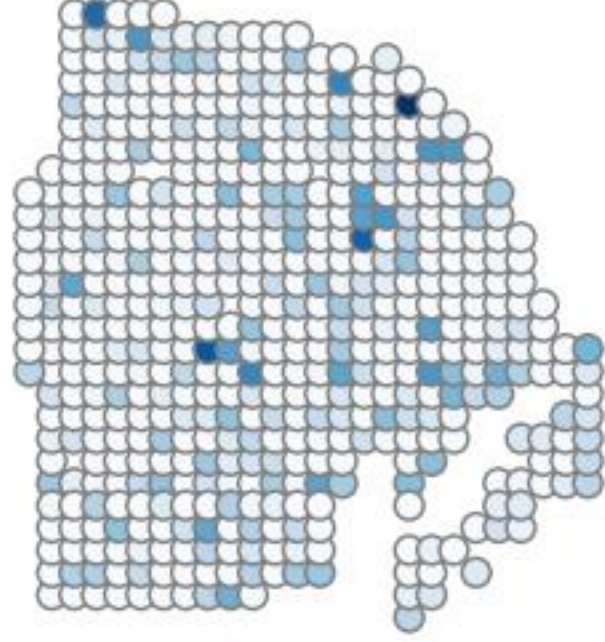

DCs

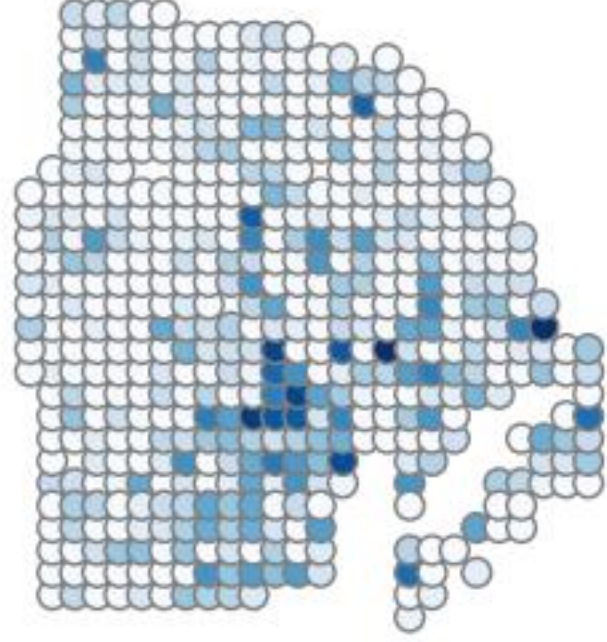

Macrophages

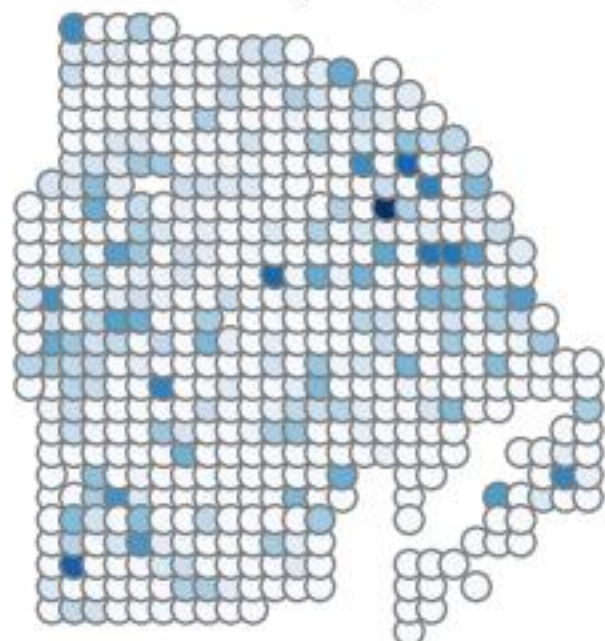

Monocytes

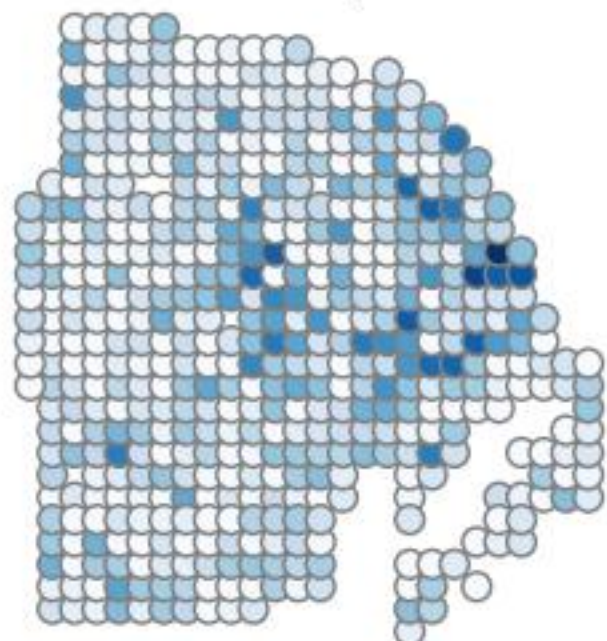

Plasma Cells

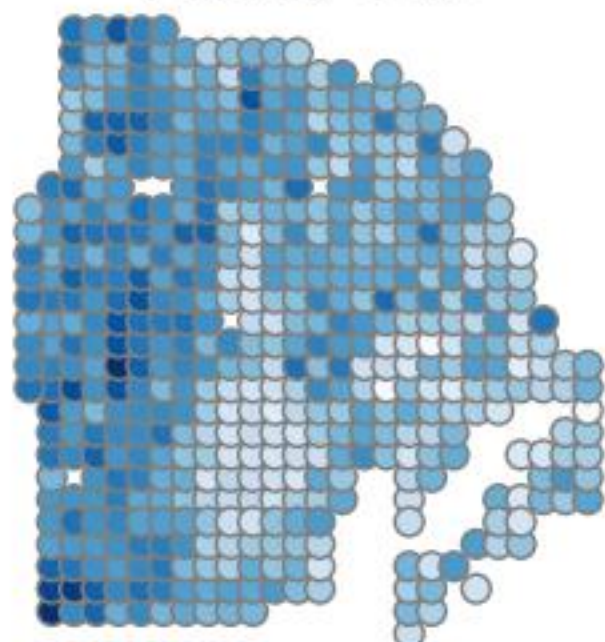

PVL Differentiated

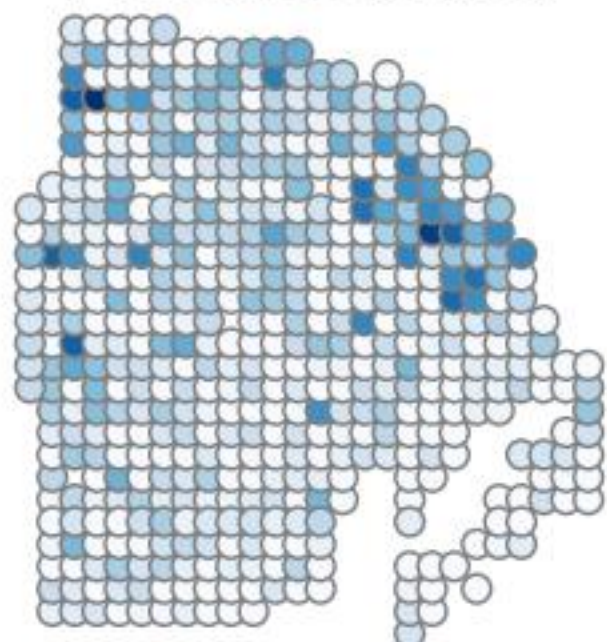

PVL Immature

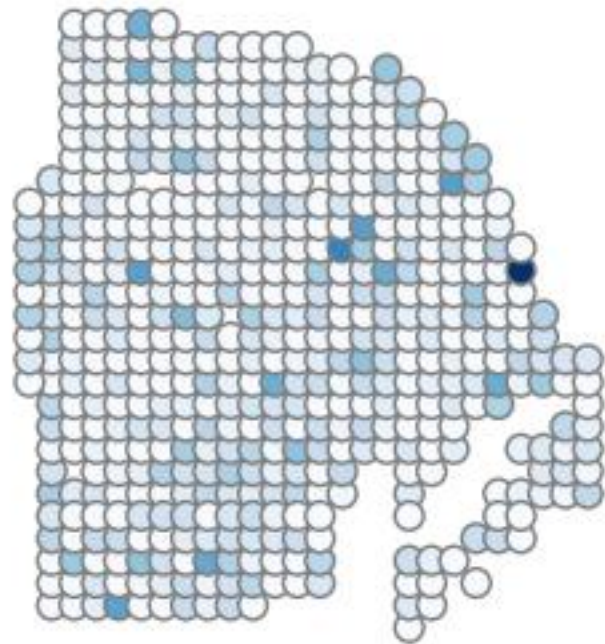

CD4+ T-cells

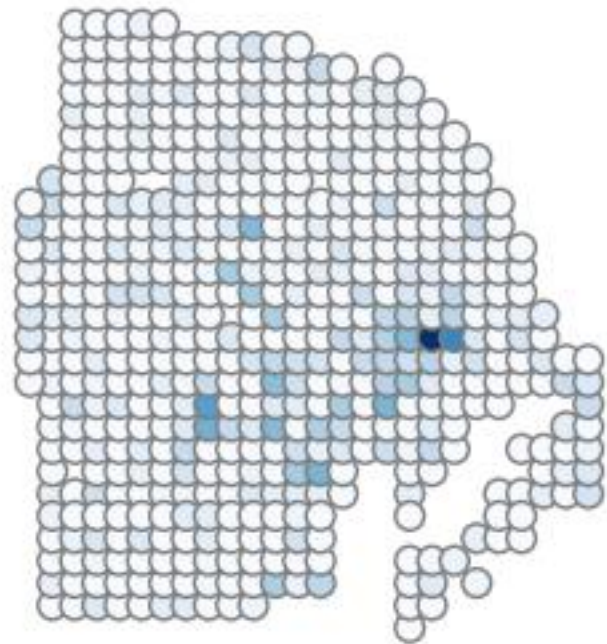

CD8+ T-cells

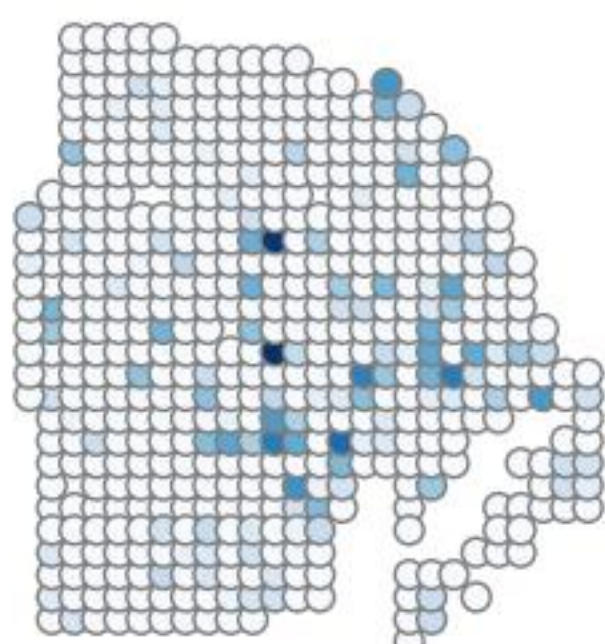

Cycling T-cells

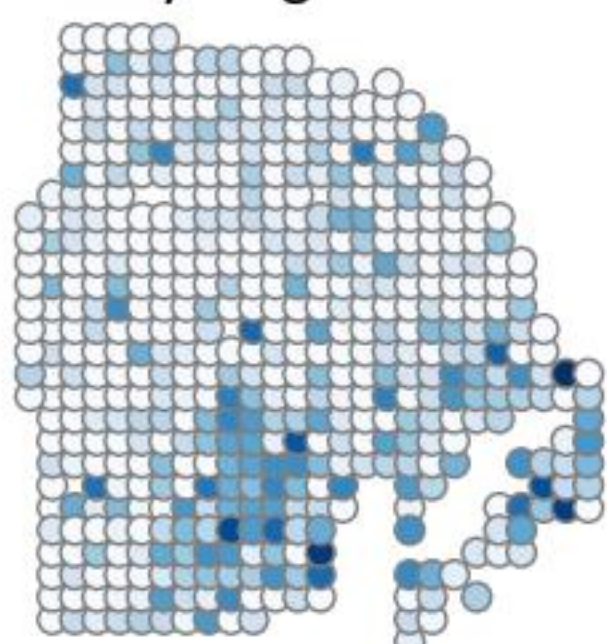

NK cells

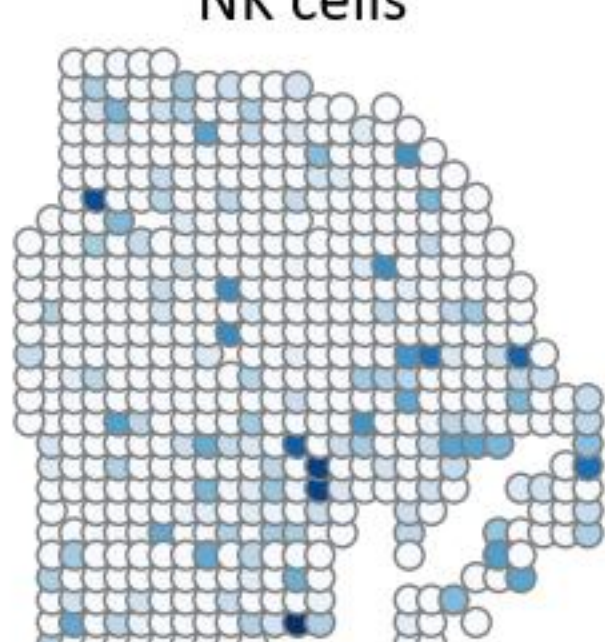

NKT cells

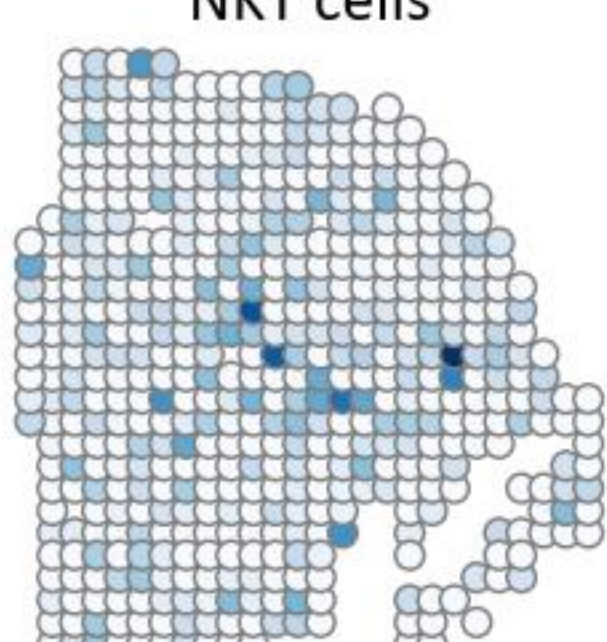

# minor\_D4

B-cells Memory

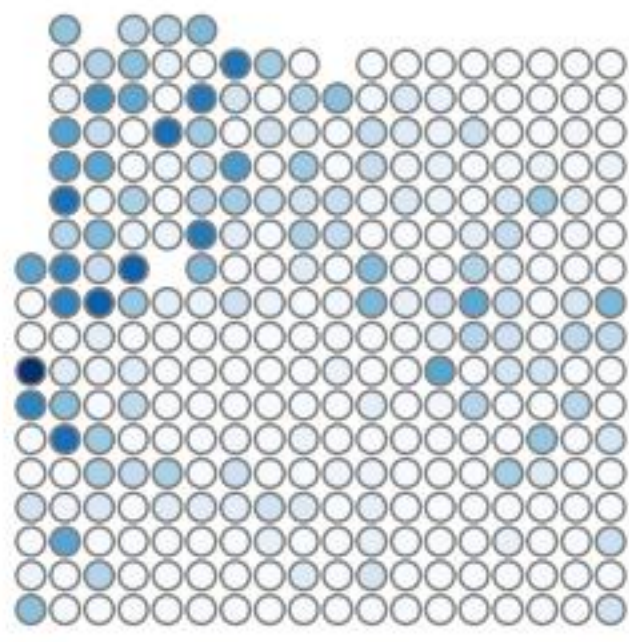

B-cells Naive

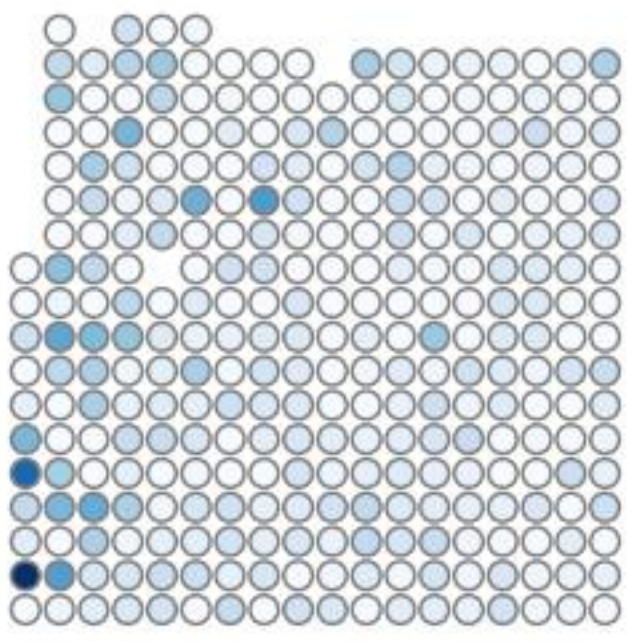

CAFs MSC/iCAF-like

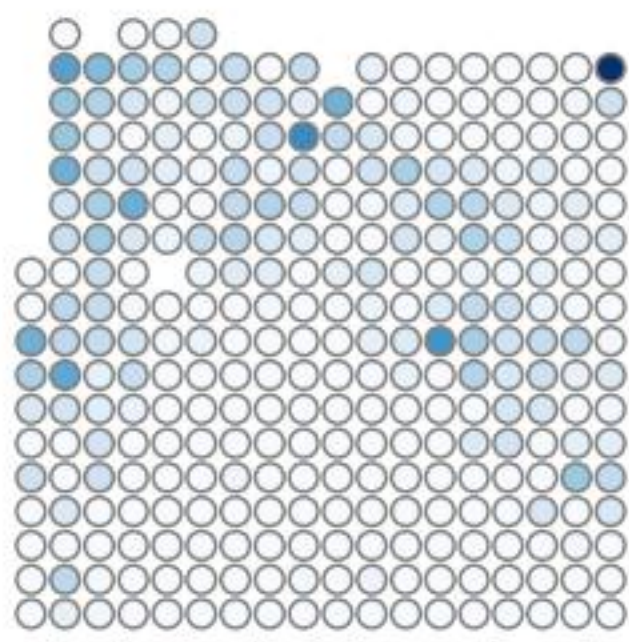

CAFs myCAF-like

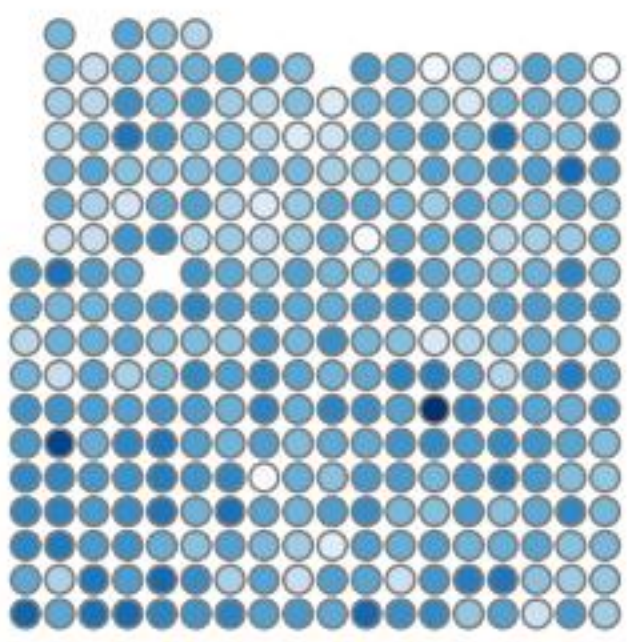

Endothelial Lymphatic LYVE1

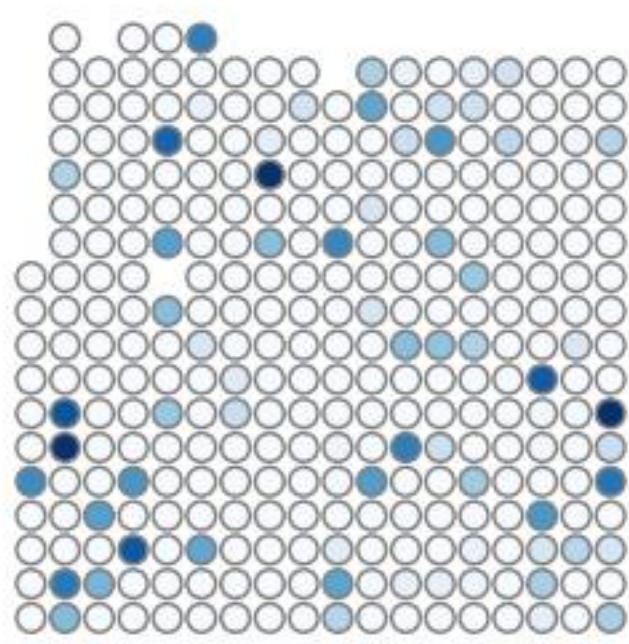

Endothelial RGS5

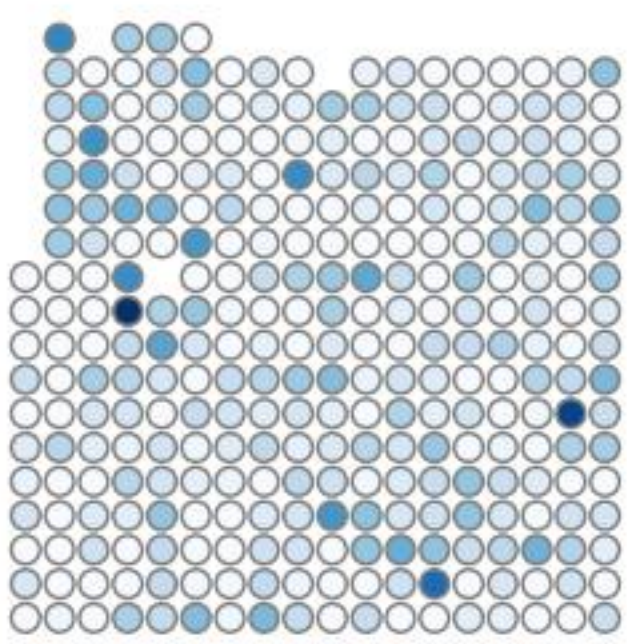

Endothelial CXCL12

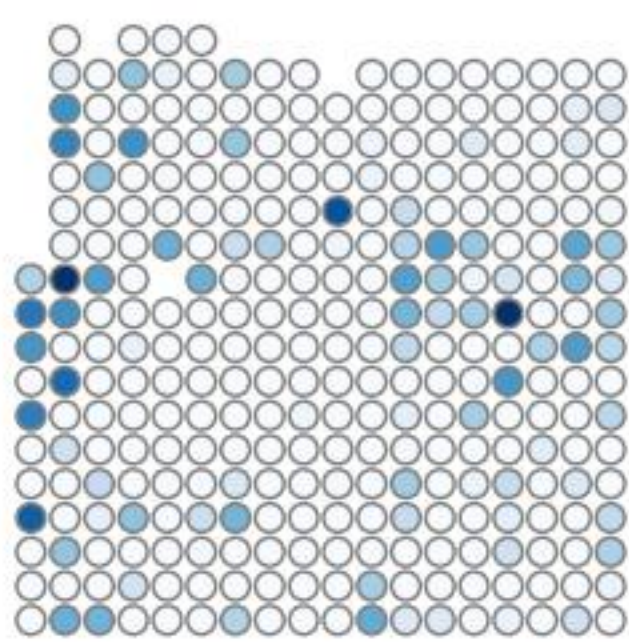

Endothelial ACKR1

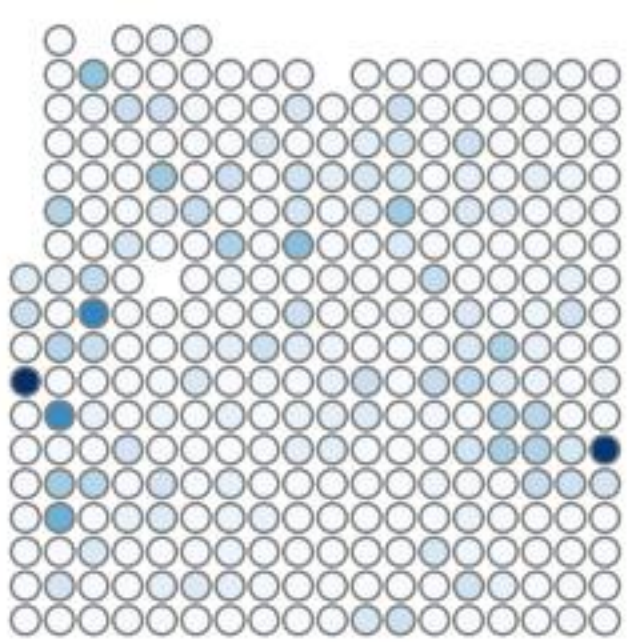

Cancer Epithelial

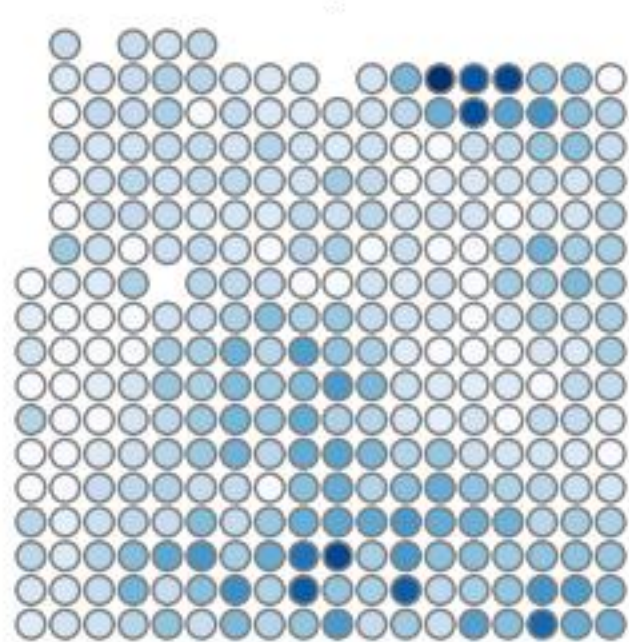

Normal Epithelial

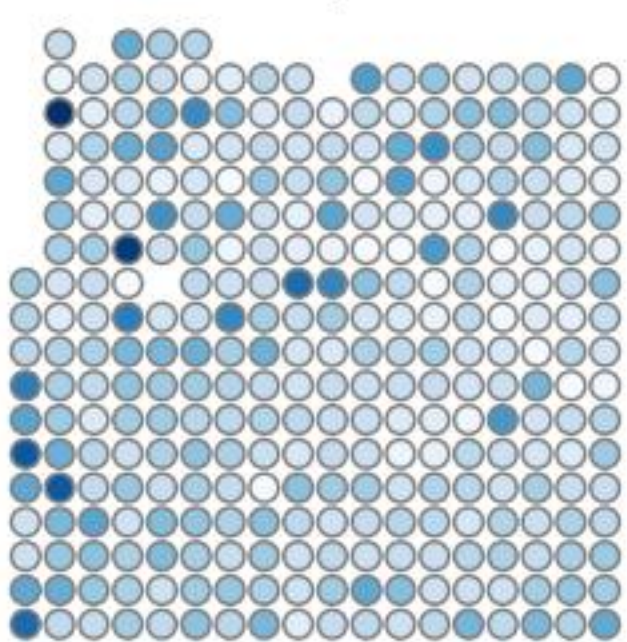

Cycling Myeloid

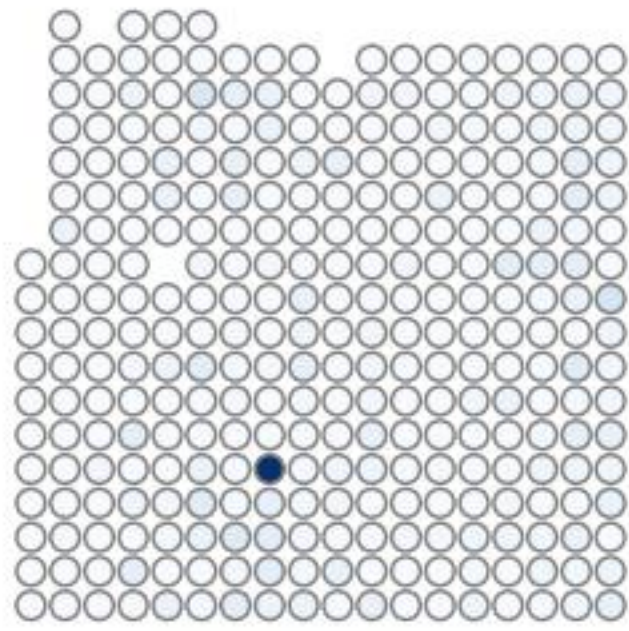

DCs

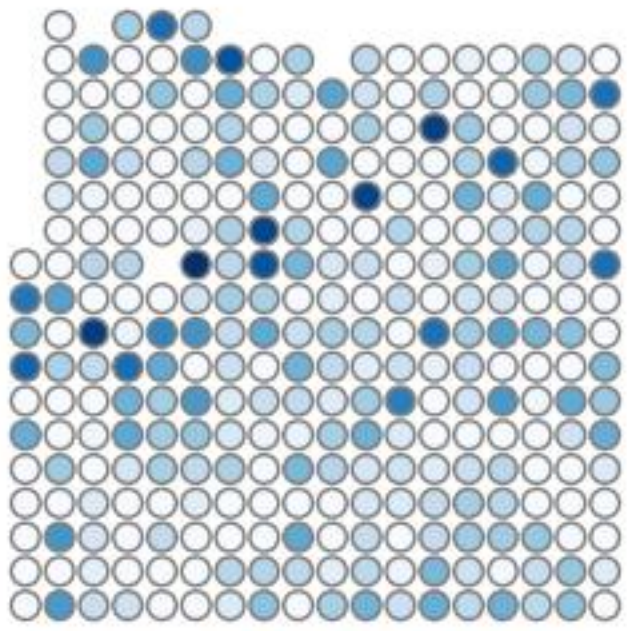

Macrophages

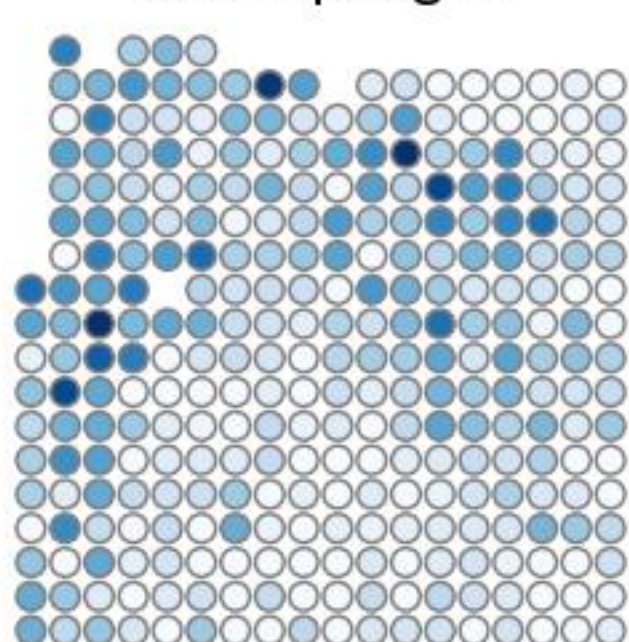

Monocytes

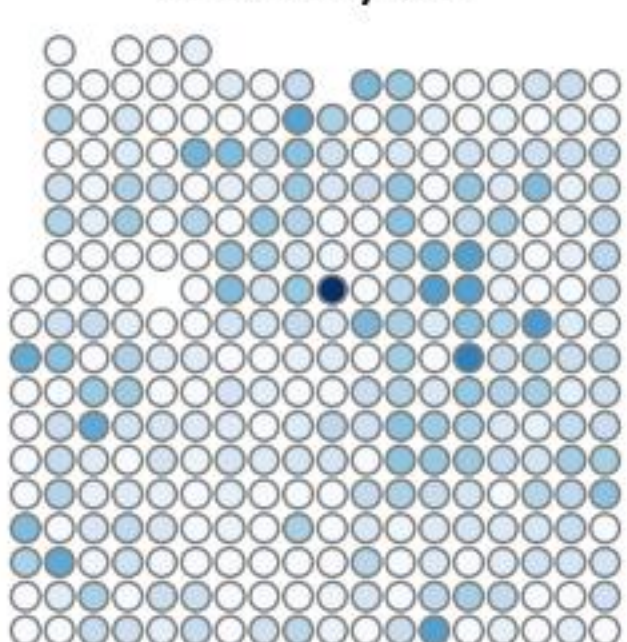

Plasma Cells

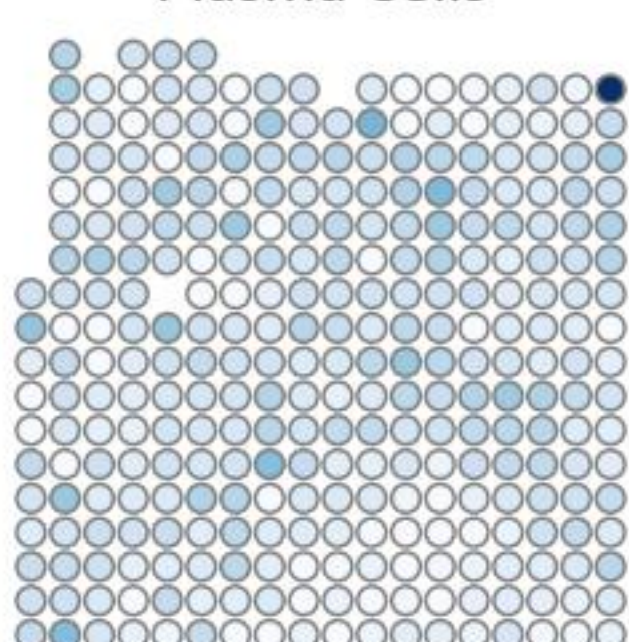

PVL Differentiated

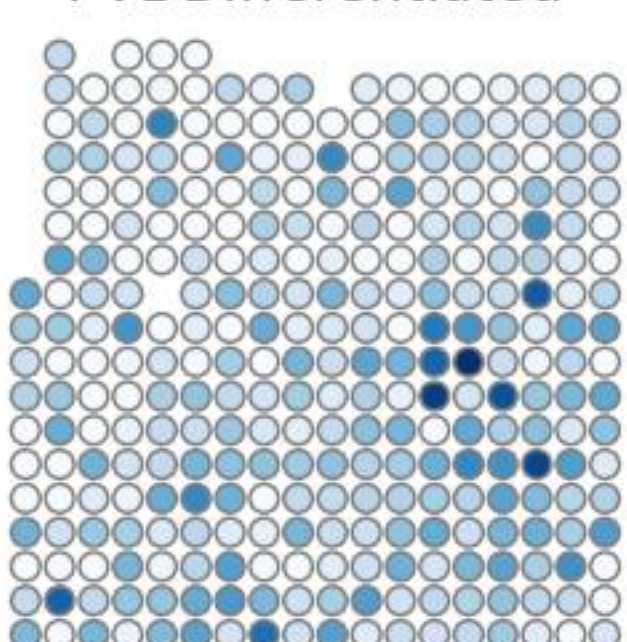

PVL Immature

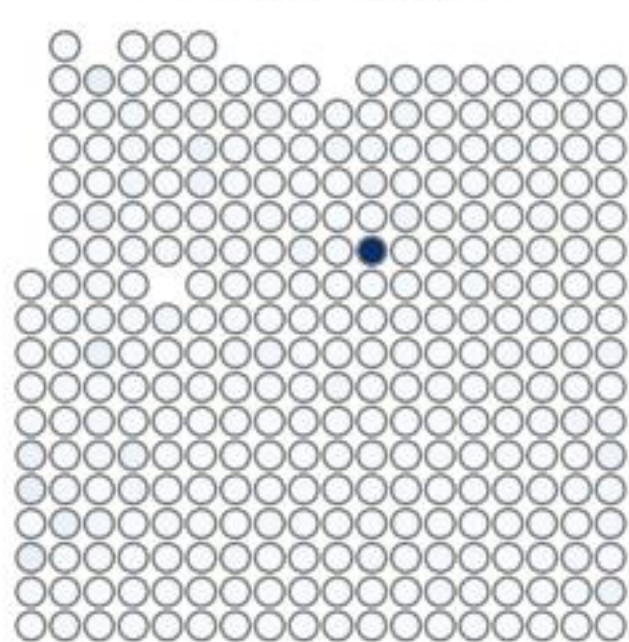

CD4+ T-cells

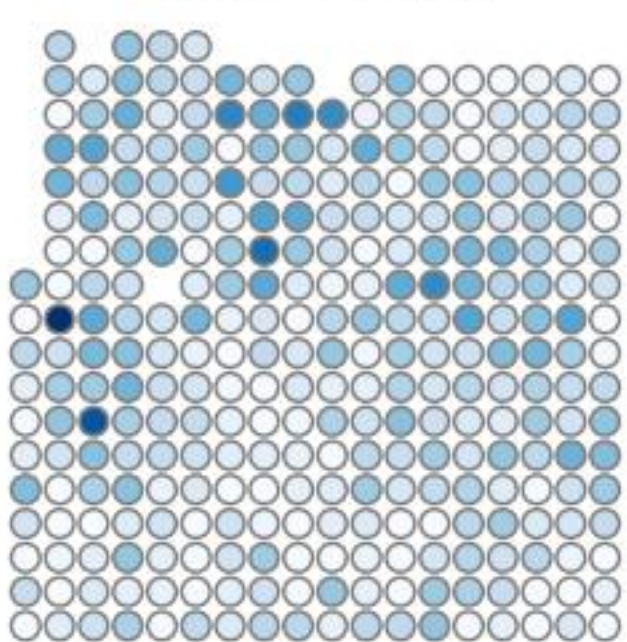

CD8+ T-cells

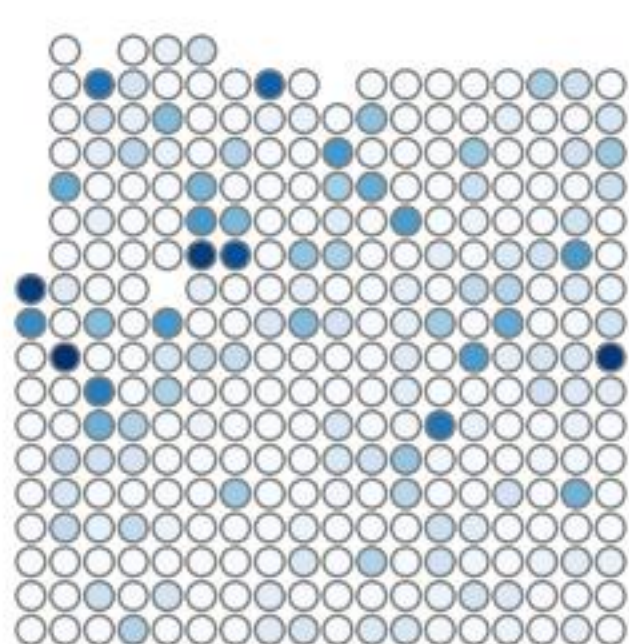

Cycling T-cells

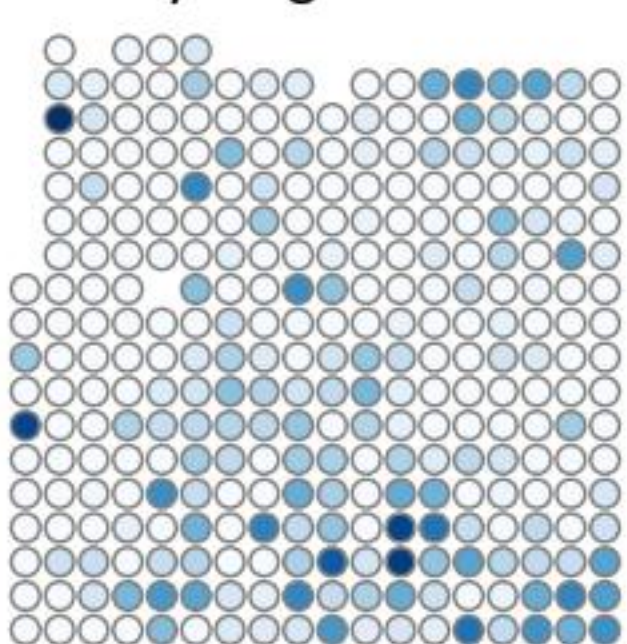

NK cells

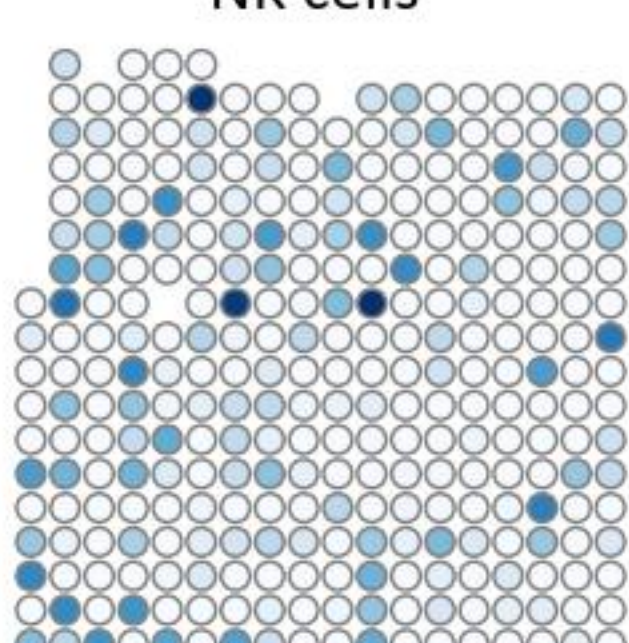

NKT cells

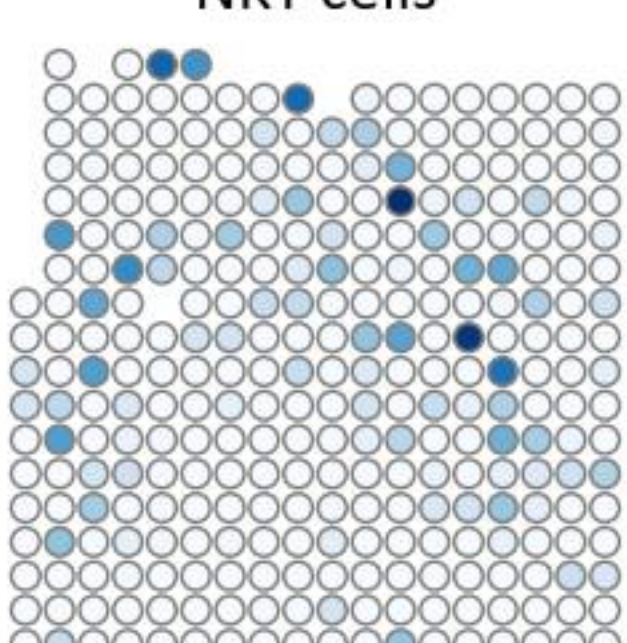

# minor\_B2

B-cells Memory

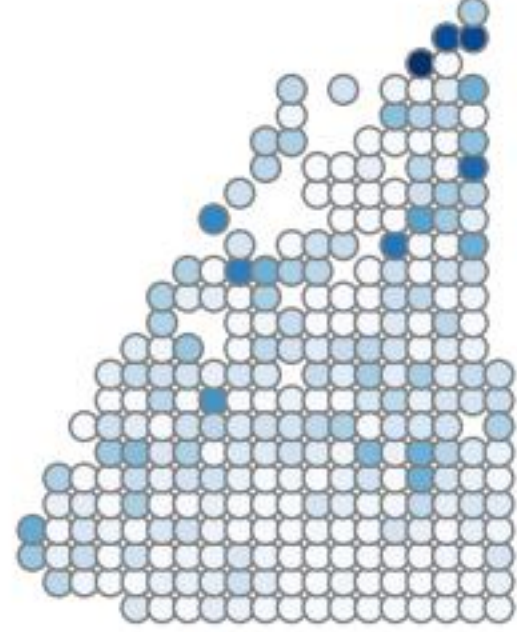

B-cells Naive

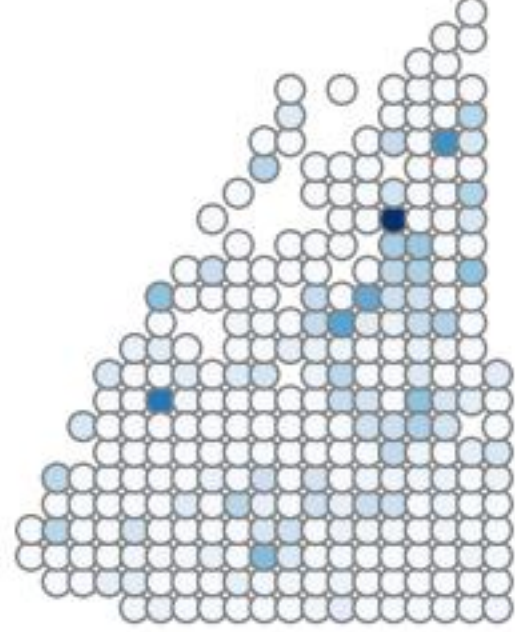

CAFs MSC/iCAF-like

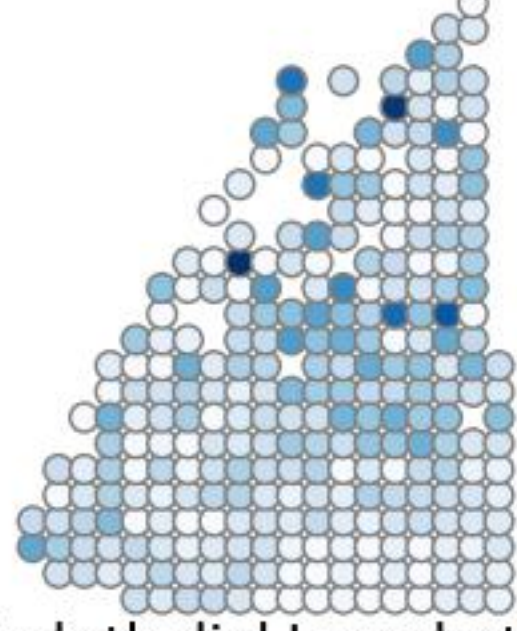

CAFs myCAF-like

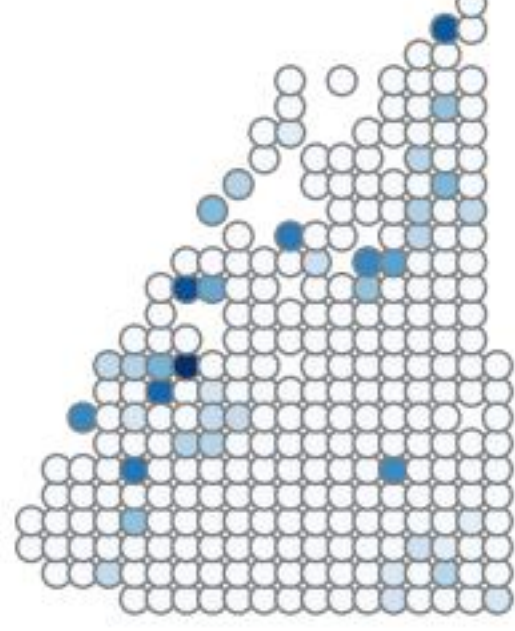

Endothelial Lymphatic  
LYVE1

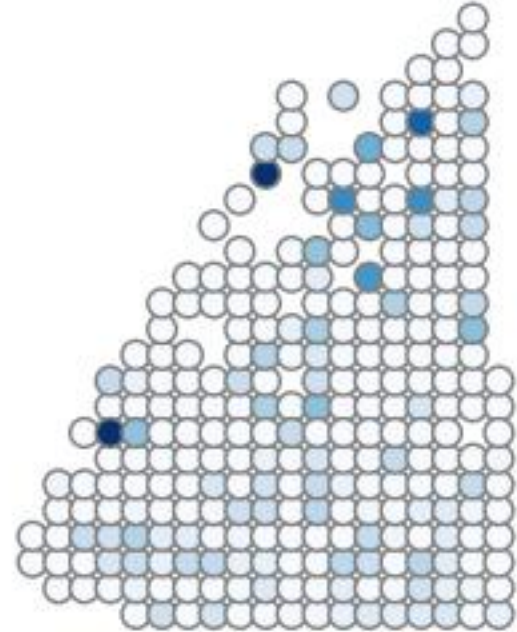

Endothelial RGS5

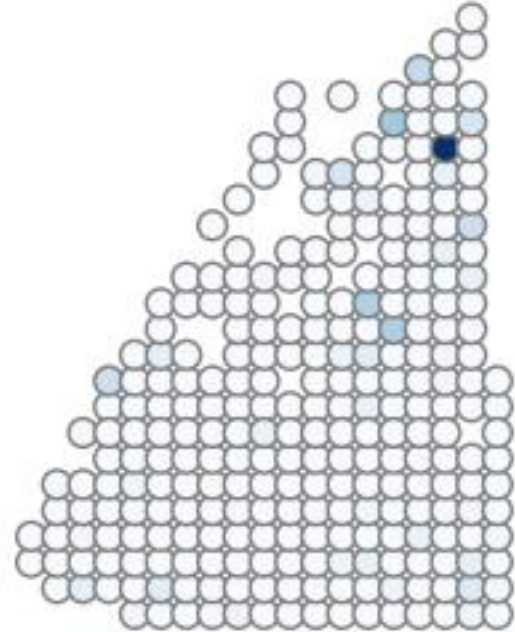

Endothelial CXCL12

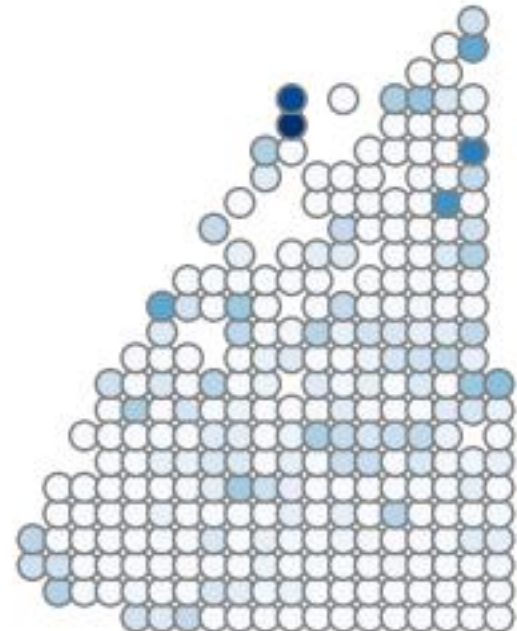

Endothelial ACKR1

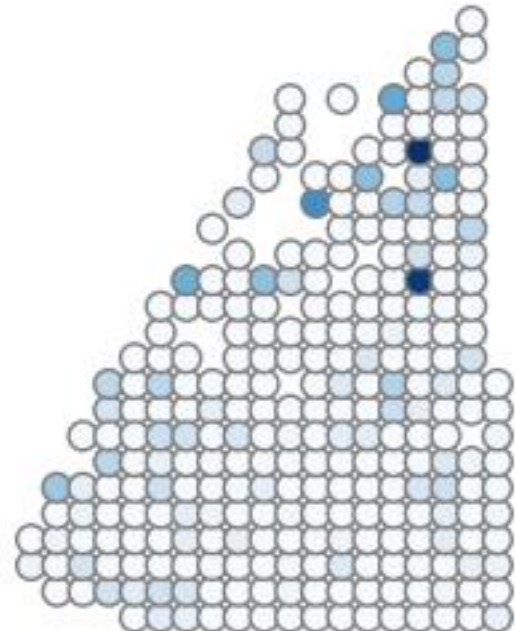

Cancer Epithelial

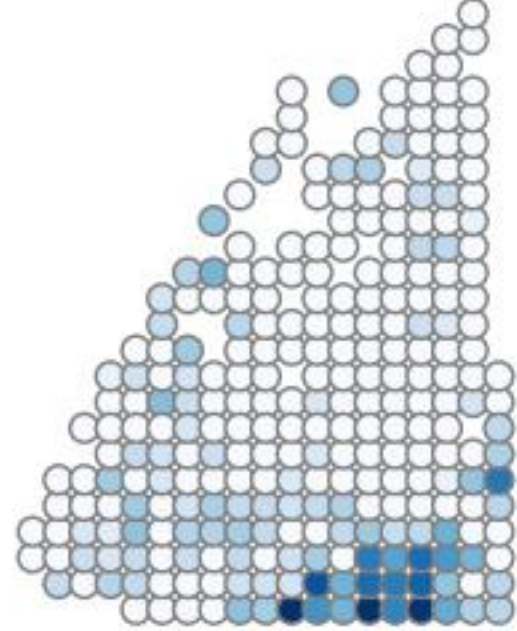

Normal Epithelial

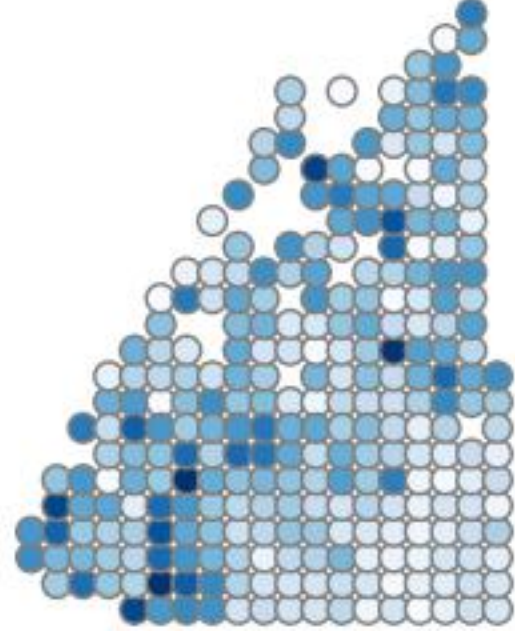

Cycling Myeloid

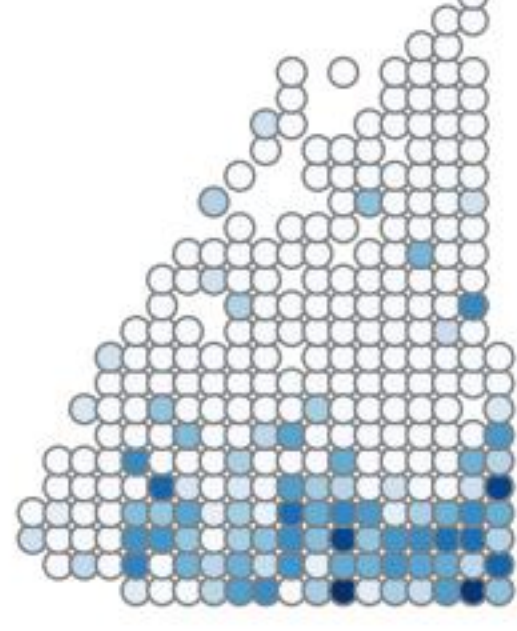

DCs

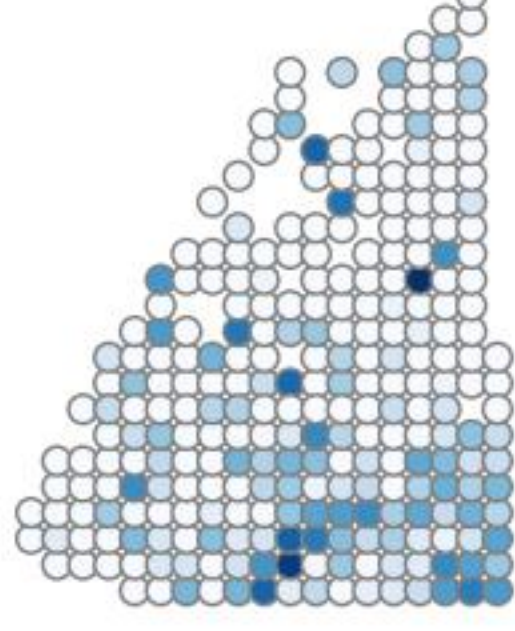

Macrophages

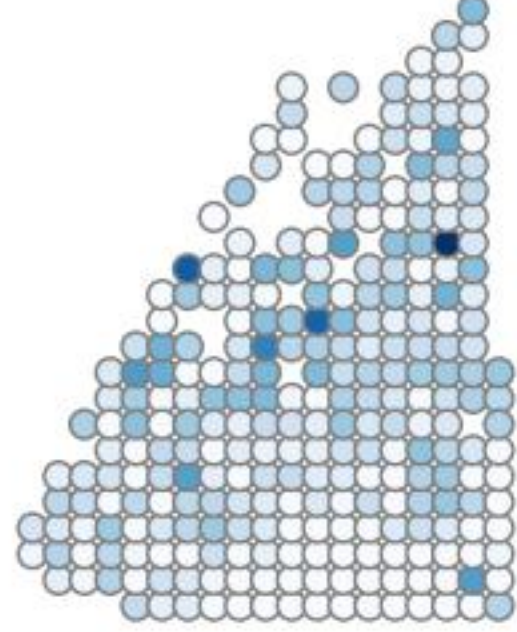

Monocytes

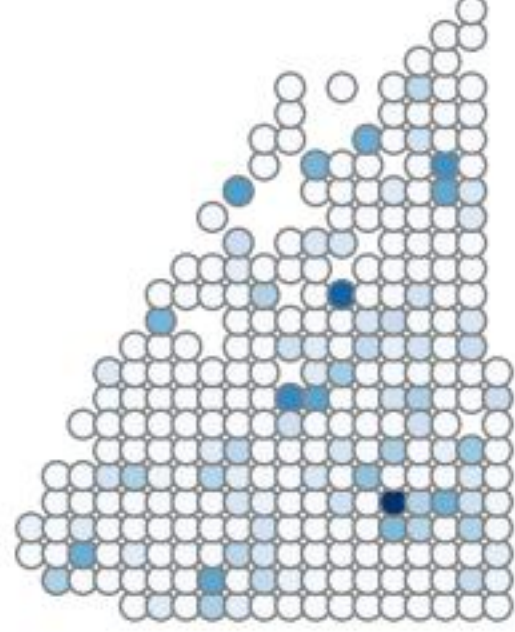

Plasma Cells

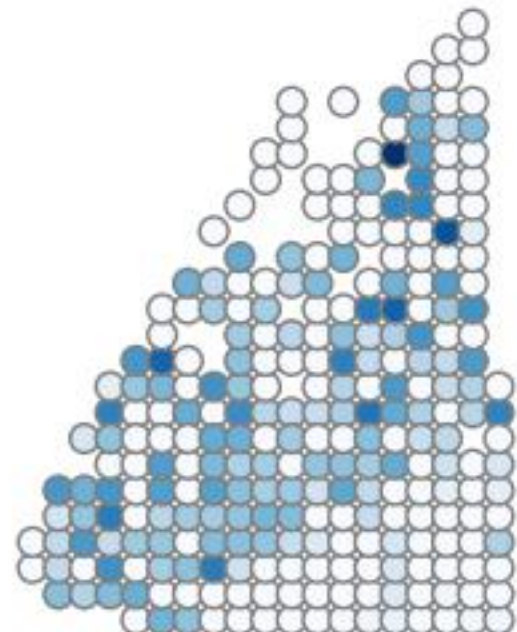

PVL Differentiated

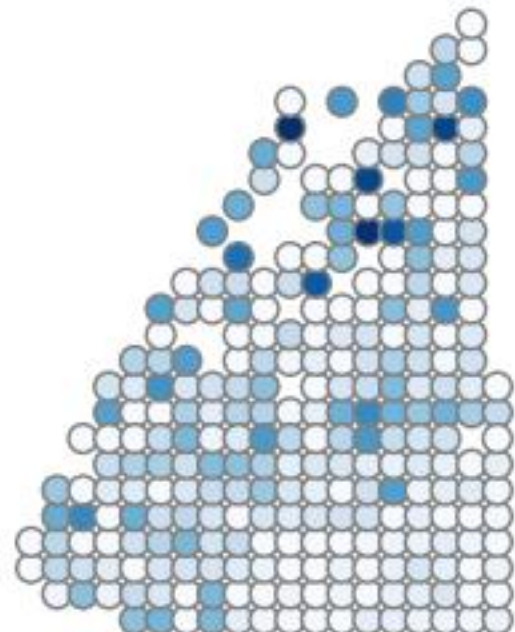

PVL Immature

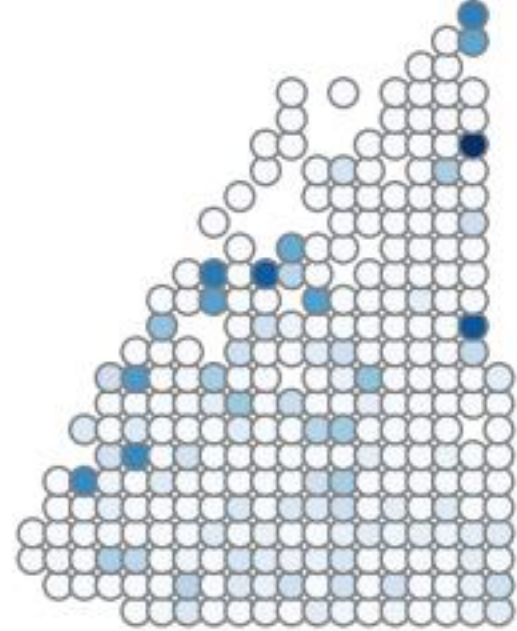

CD4+ T-cells

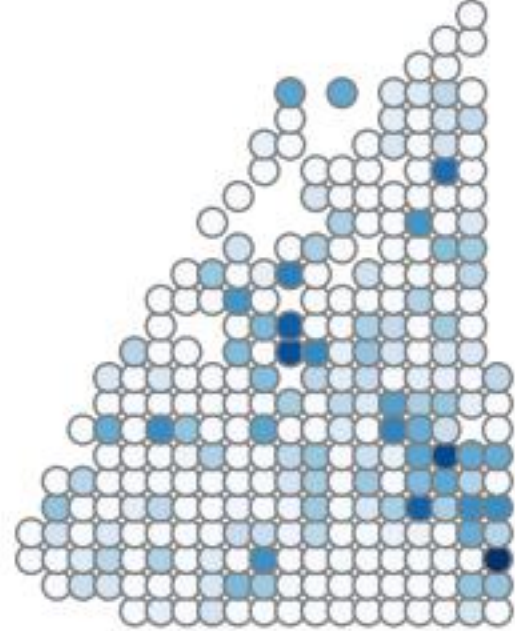

CD8+ T-cells

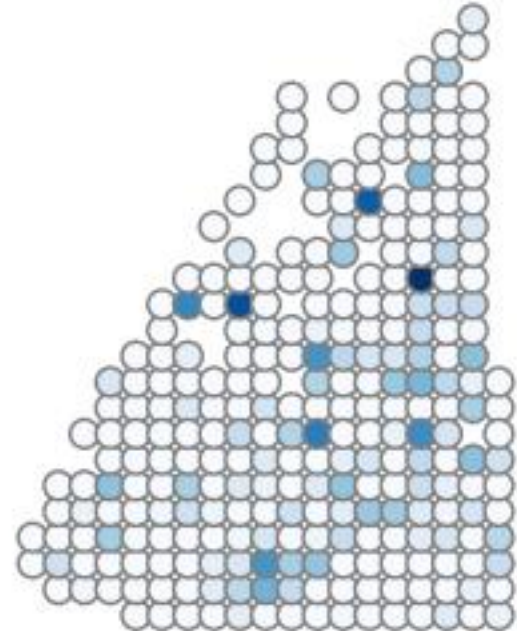

Cycling T-cells

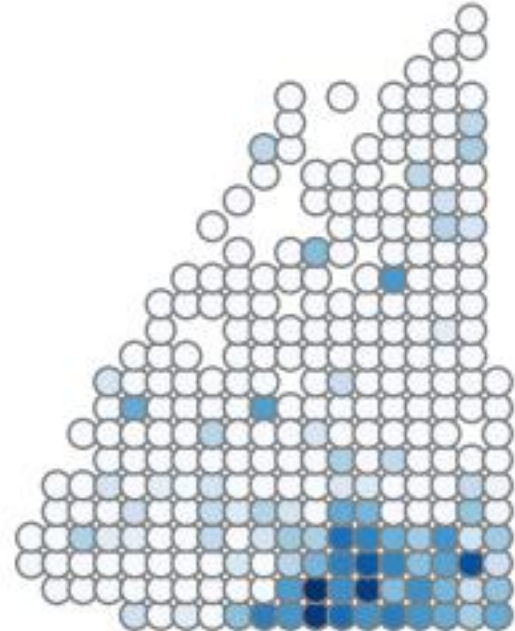

NK cells

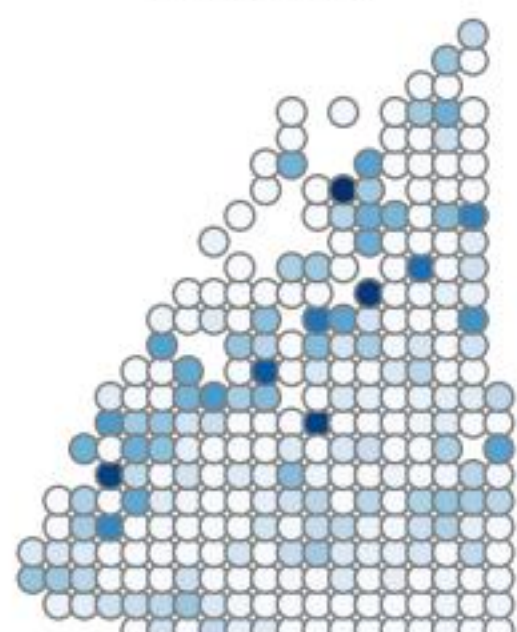

NKT cells

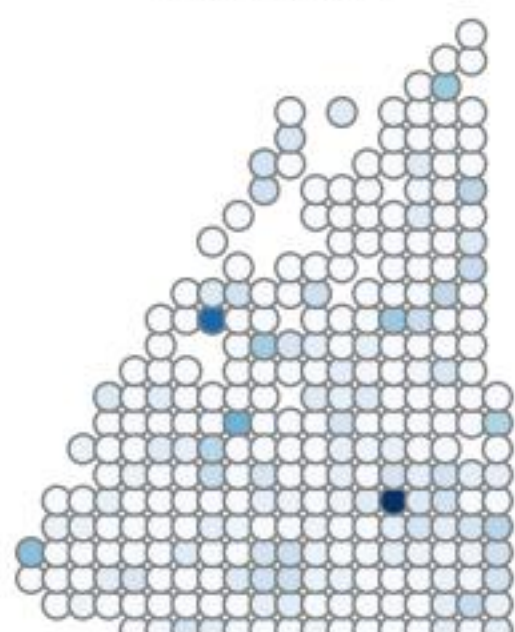

# minor\_A6

B-cells Memory

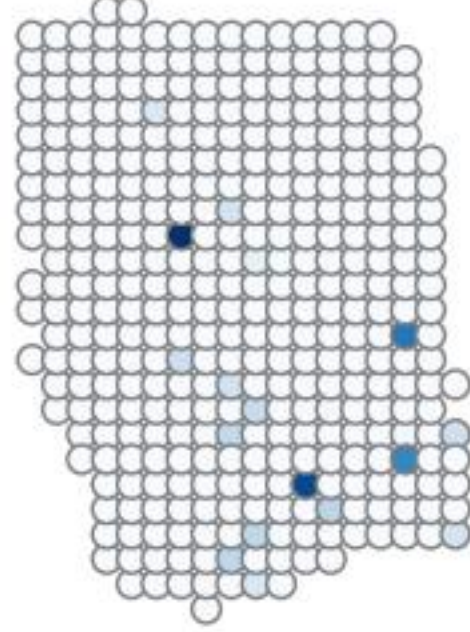

B-cells Naive

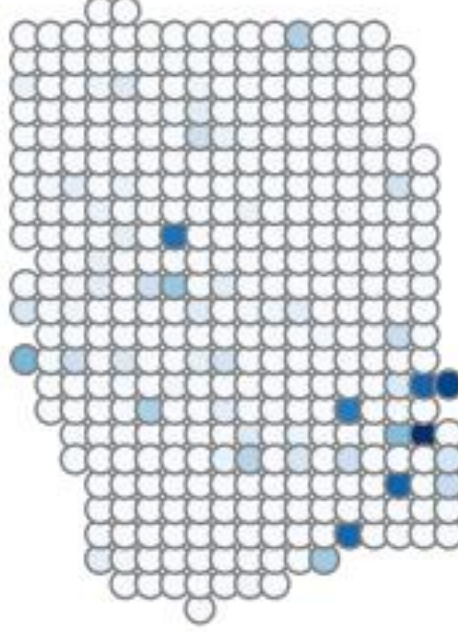

CAFs MSC/iCAF-like

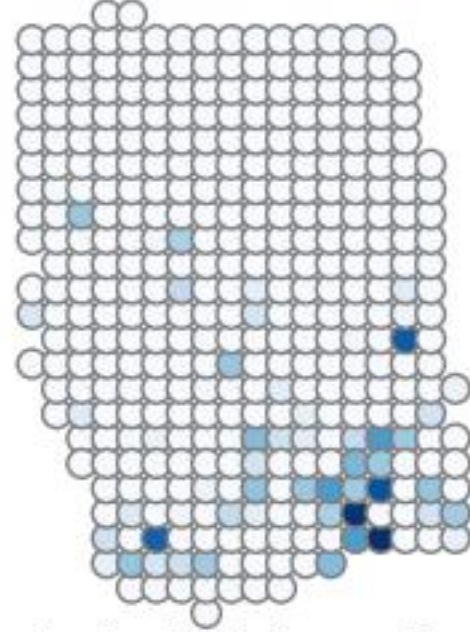

CAFs myCAF-like

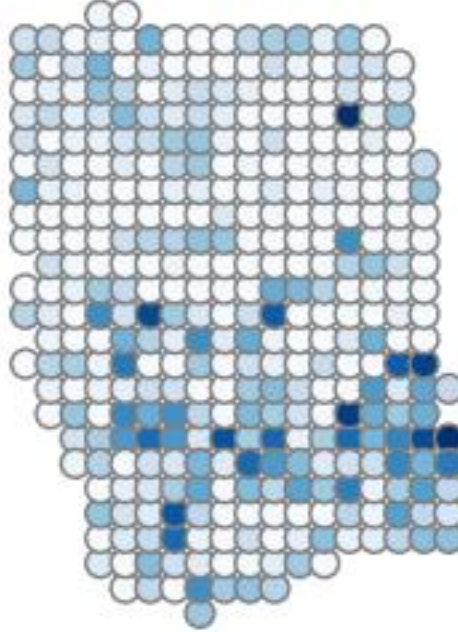

Endothelial Lymphatic  
LYVE1

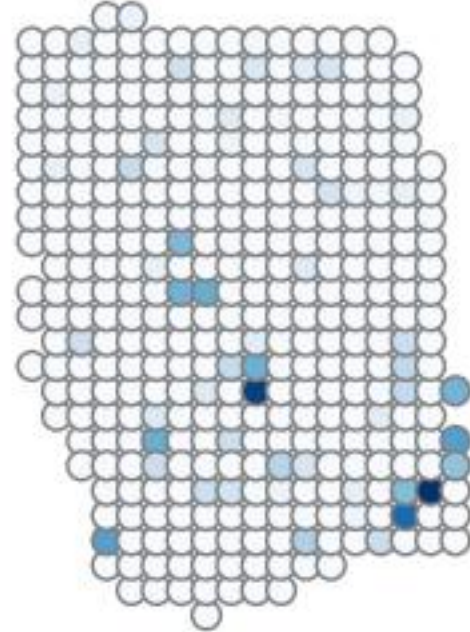

Endothelial RGS5

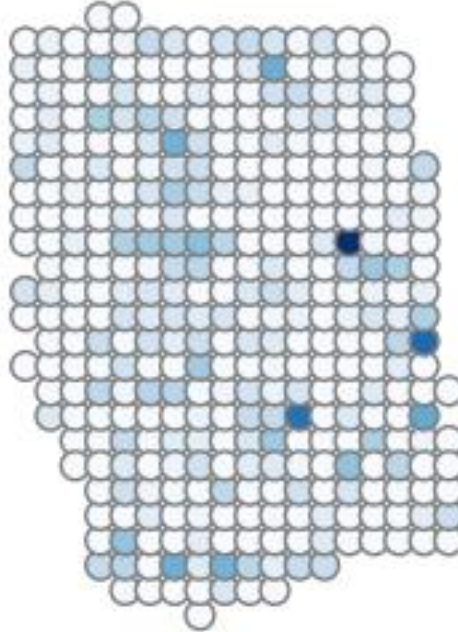

Endothelial CXCL12

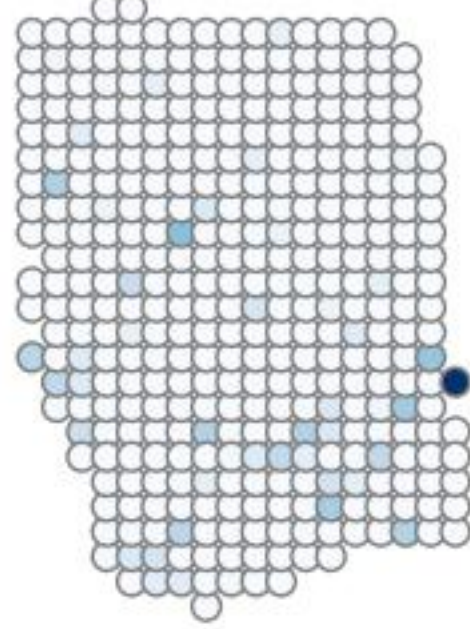

Endothelial ACKR1

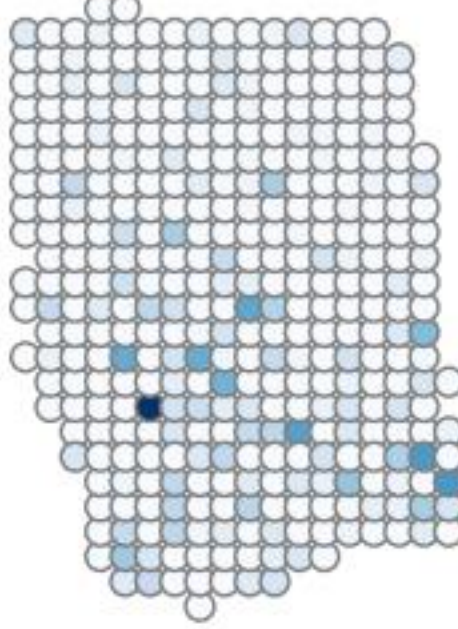

Cancer Epithelial

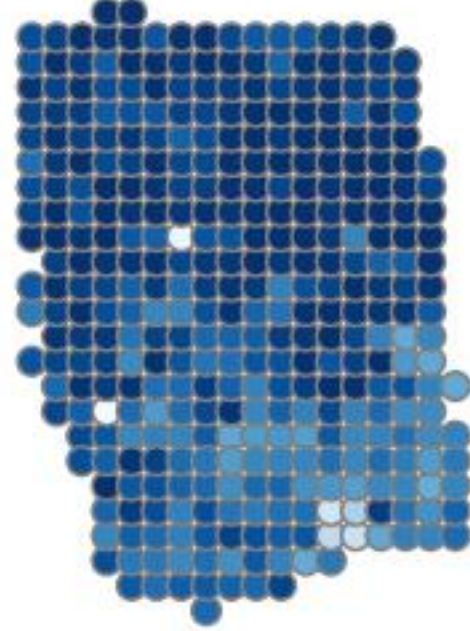

Normal Epithelial

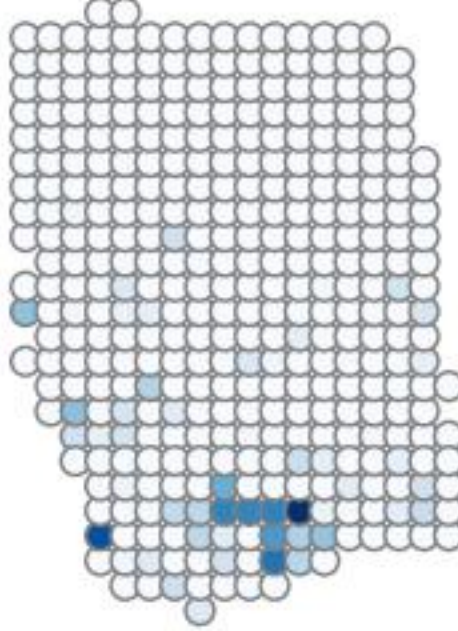

Cycling Myeloid

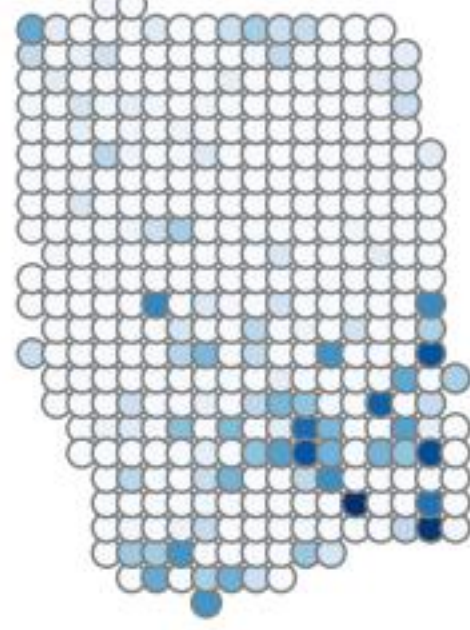

DCs

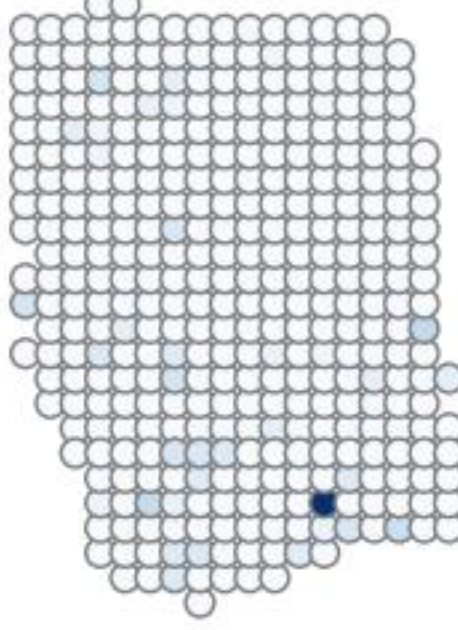

Macrophages

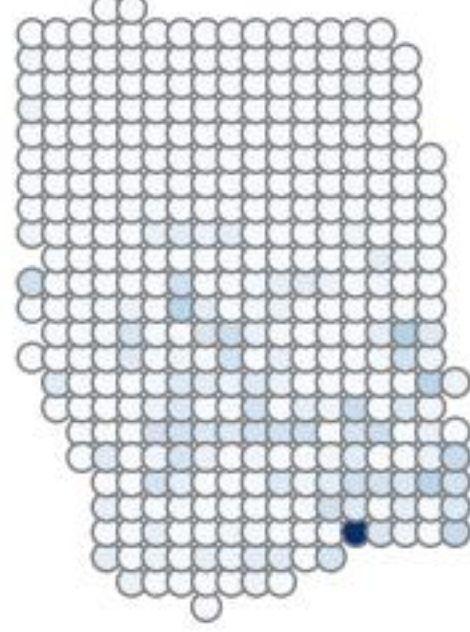

Monocytes

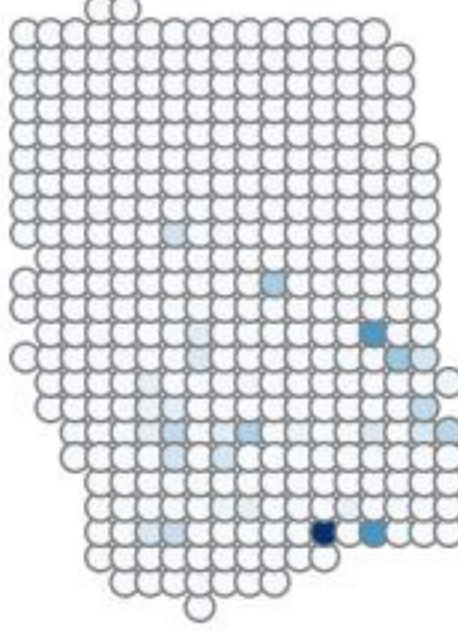

Plasma Cells

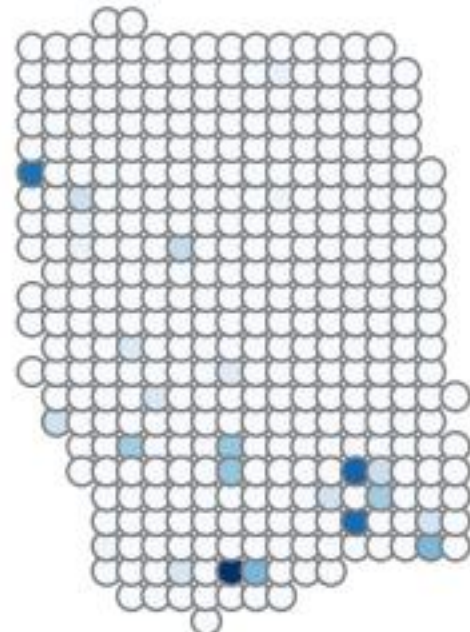

PVL Differentiated

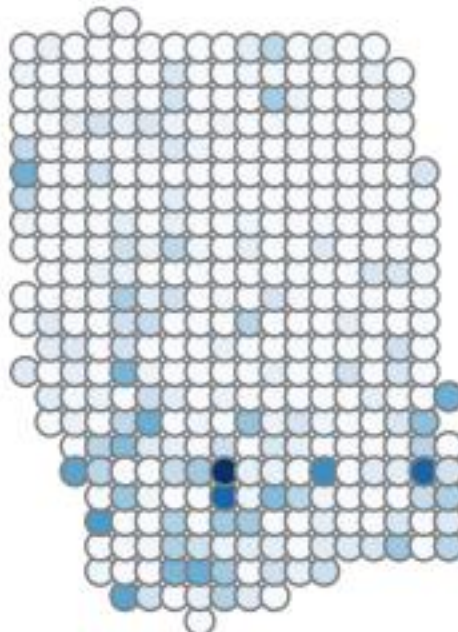

PVL Immature

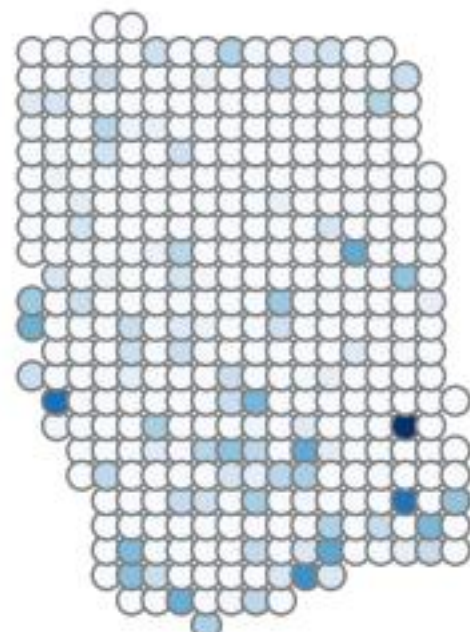

CD4+ T-cells

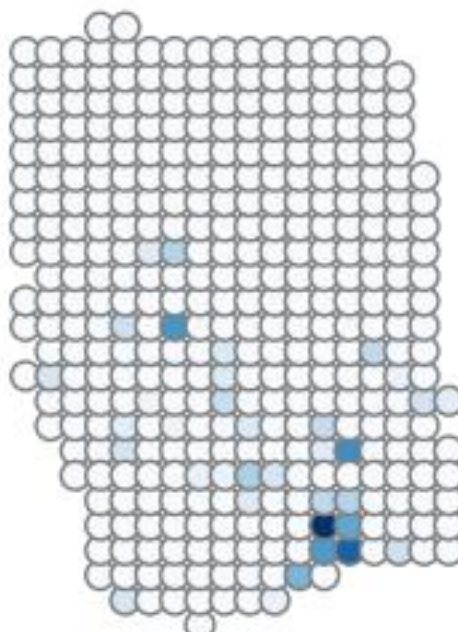

CD8+ T-cells

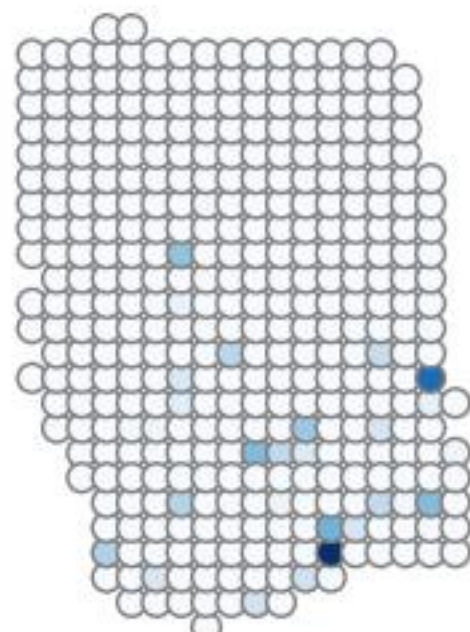

Cycling T-cells

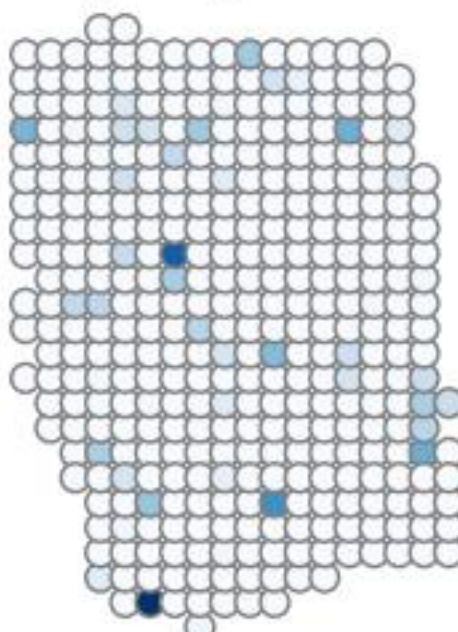

NK cells

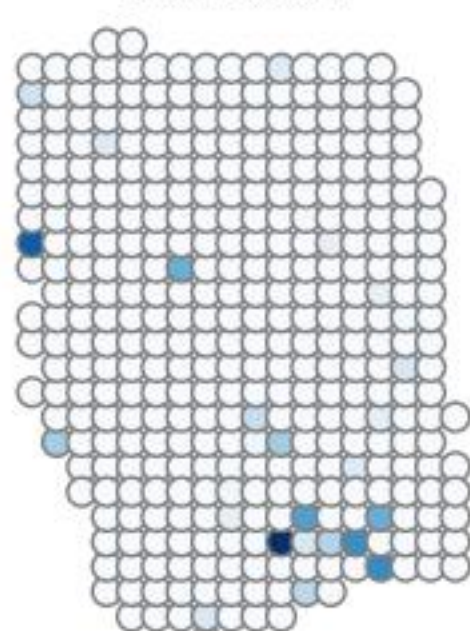

NKT cells

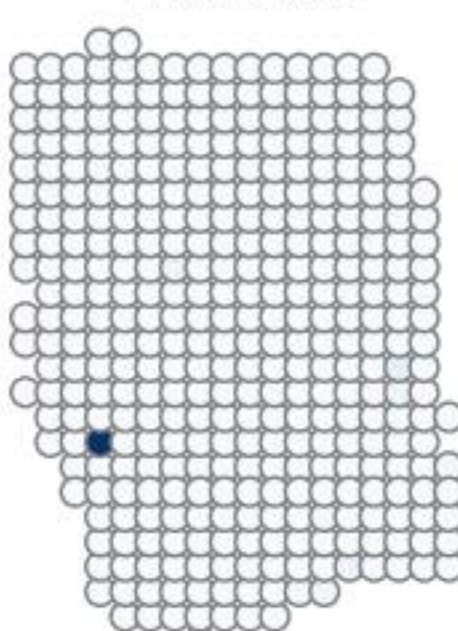



# minor\_F3

B-cells Memory

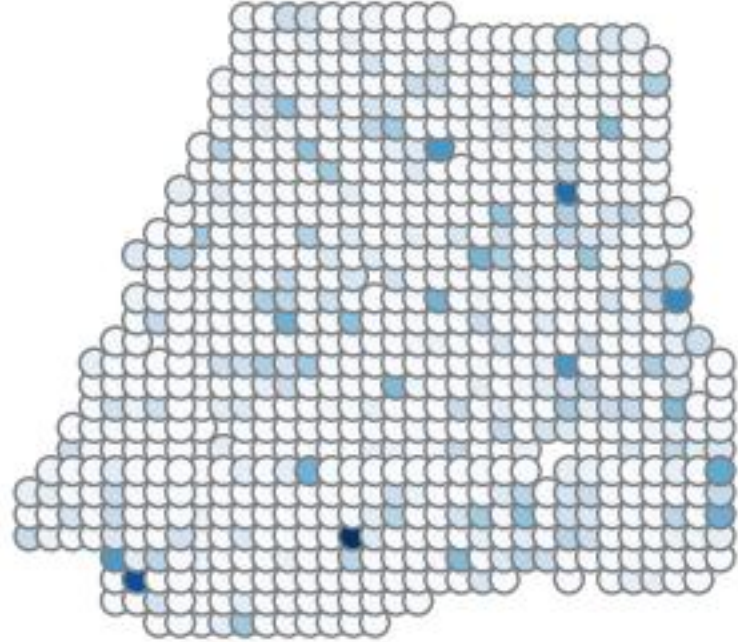

B-cells Naive

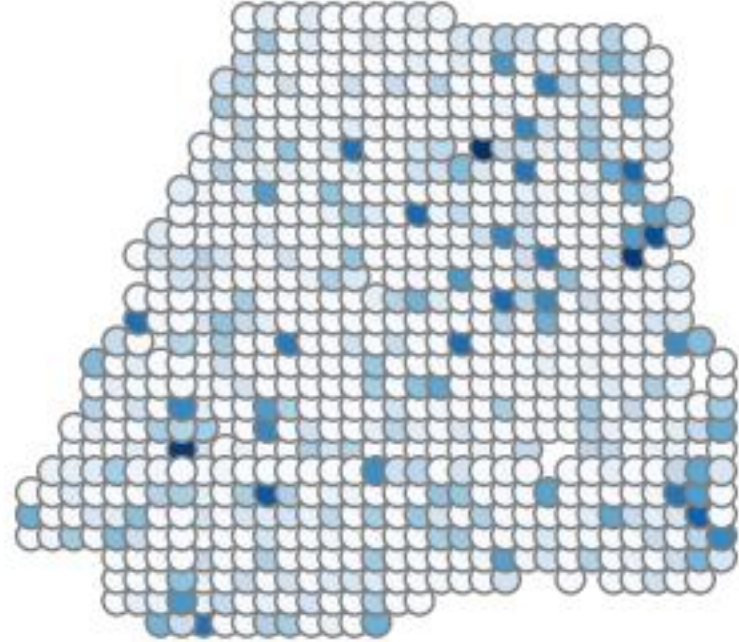

CAFs MSC/iCAF-like

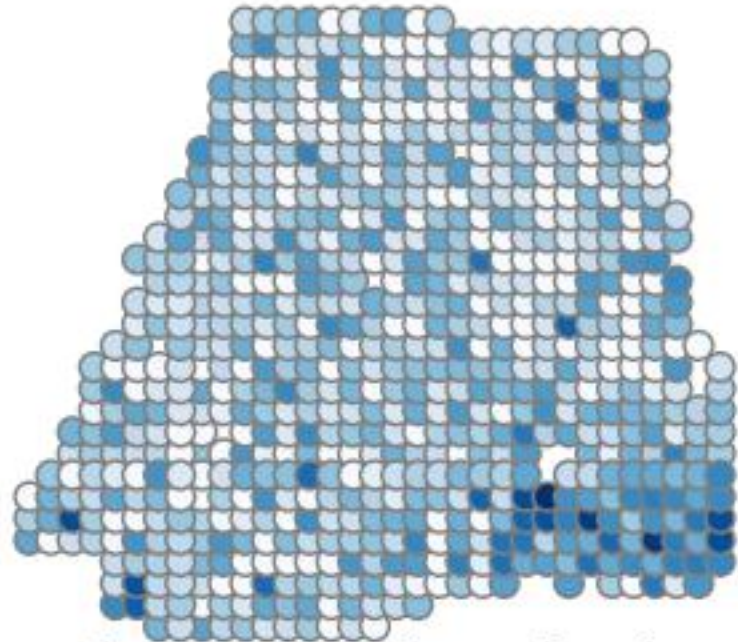

CAFs myCAF-like

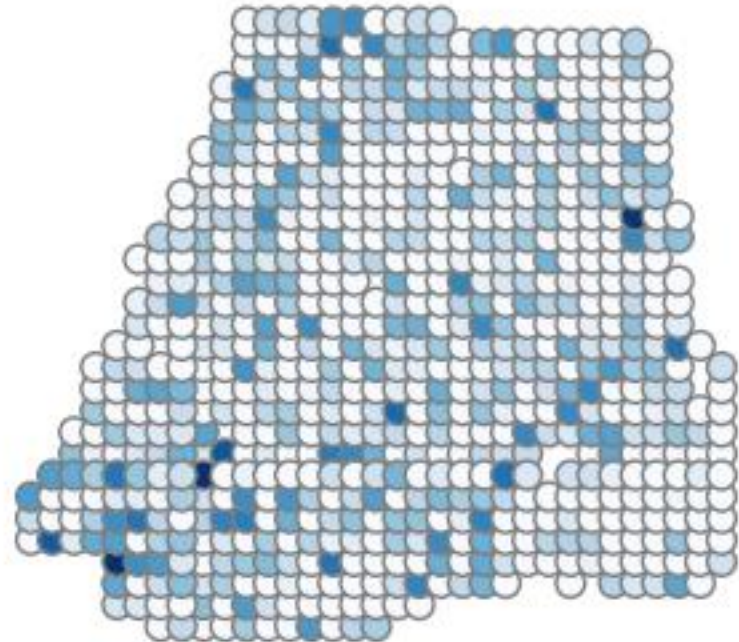

Endothelial Lymphatic  
LYVE1

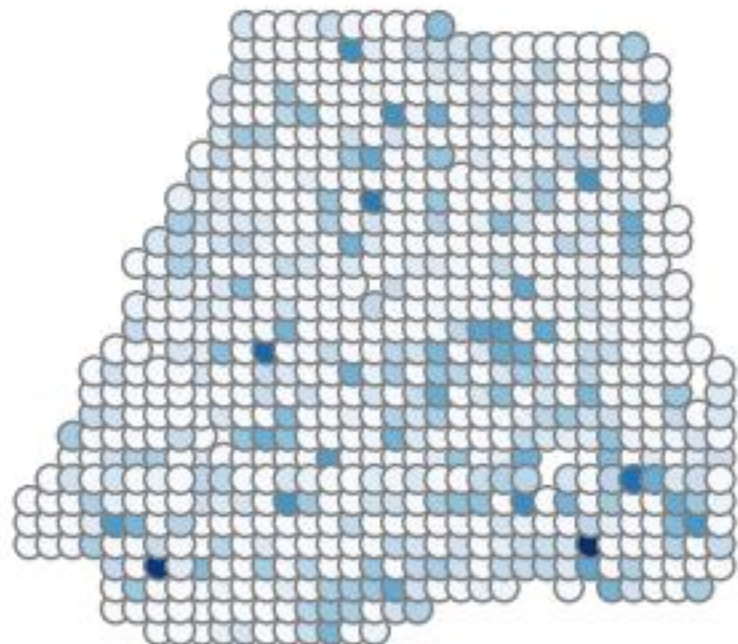

Endothelial RGS5

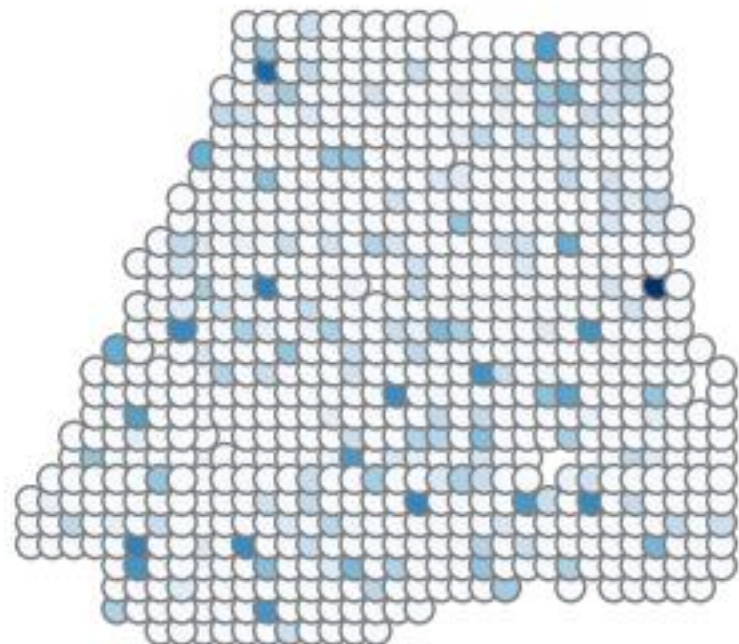

Endothelial CXCL12

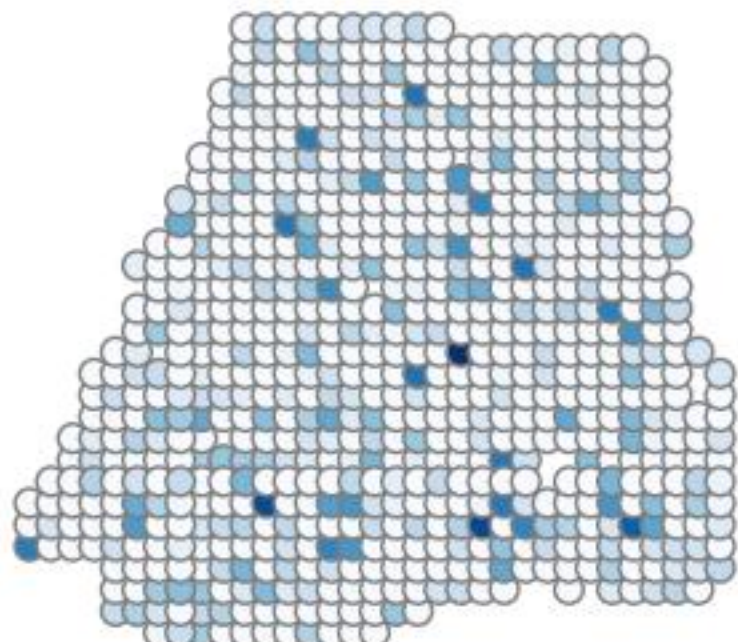

Endothelial ACKR1

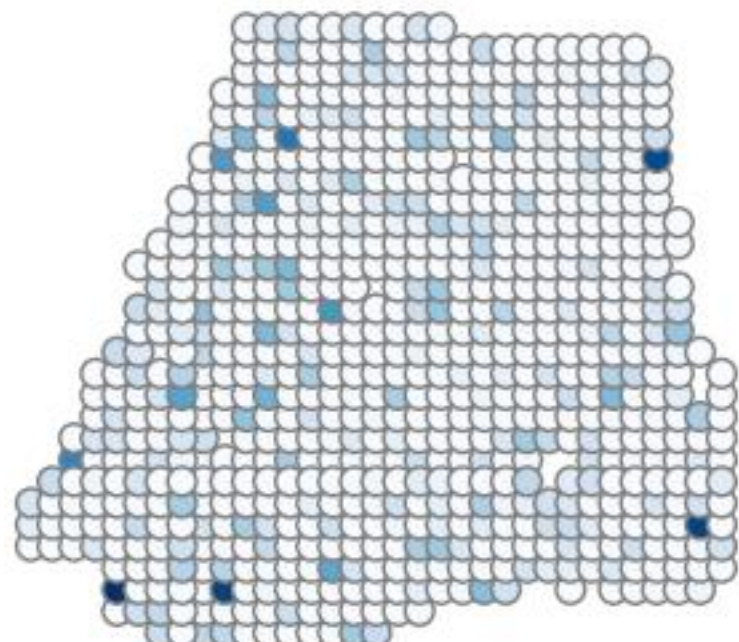

Cancer Epithelial

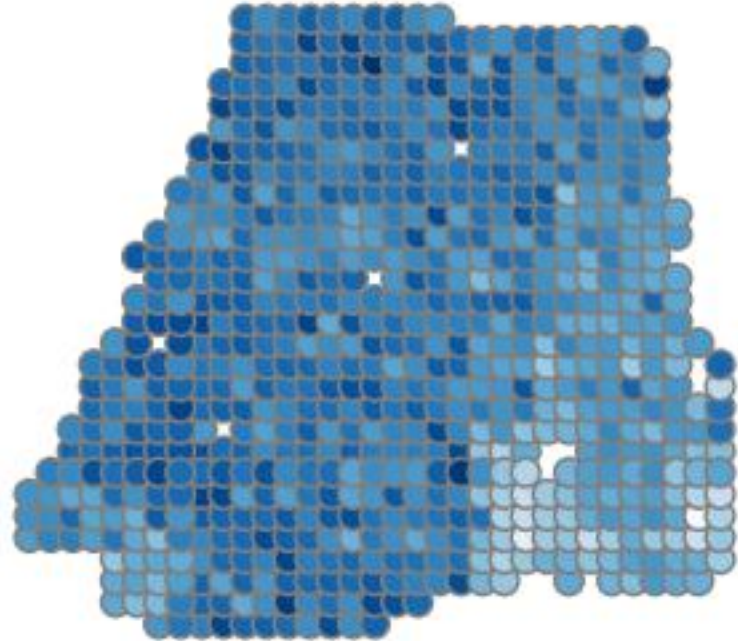

Normal Epithelial

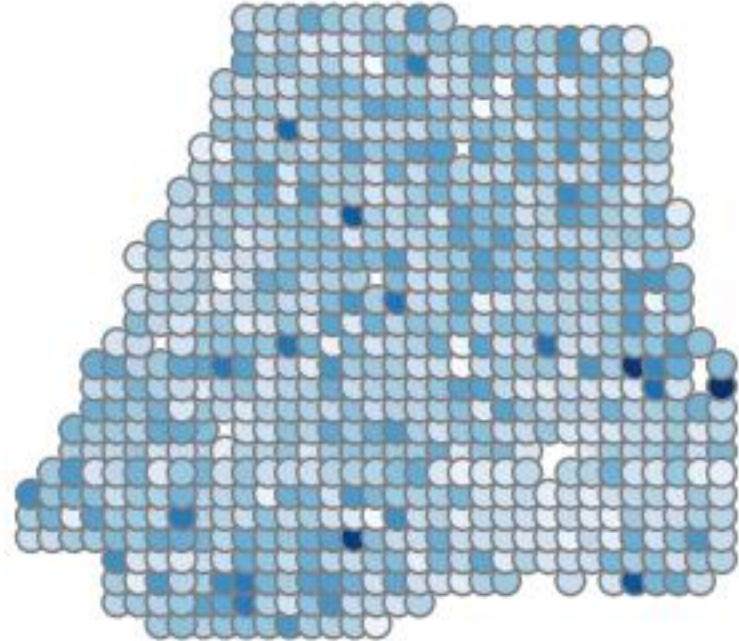

Cycling Myeloid

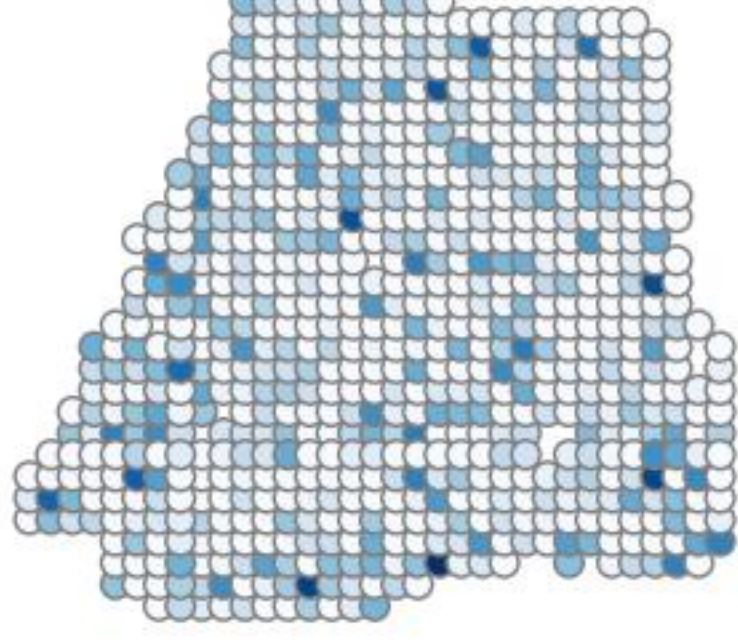

DCs

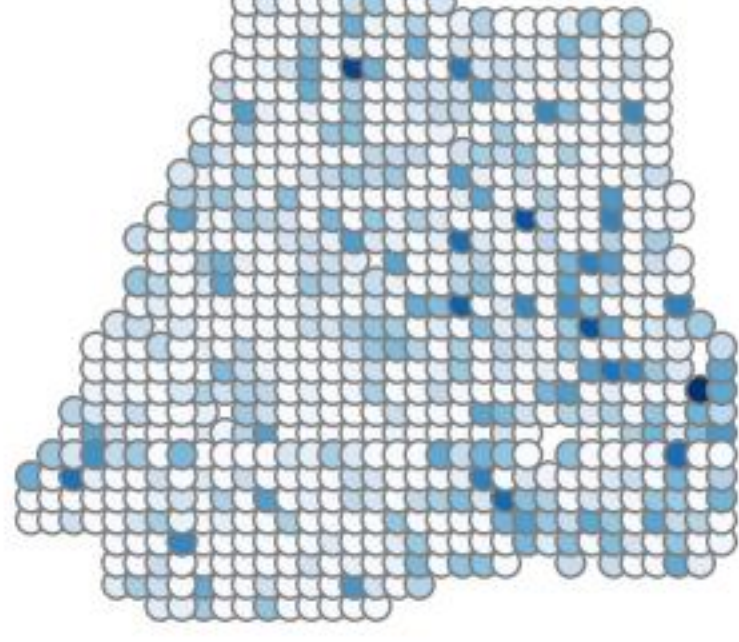

Macrophages

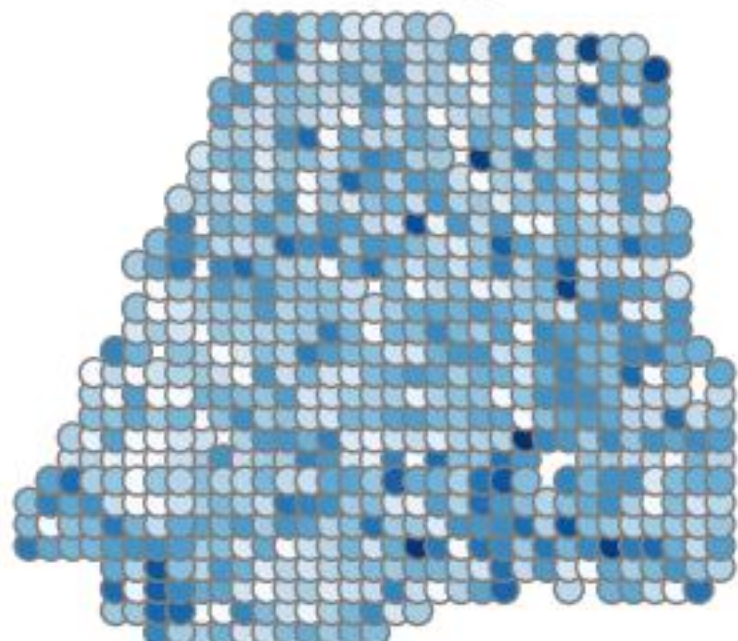

Monocytes

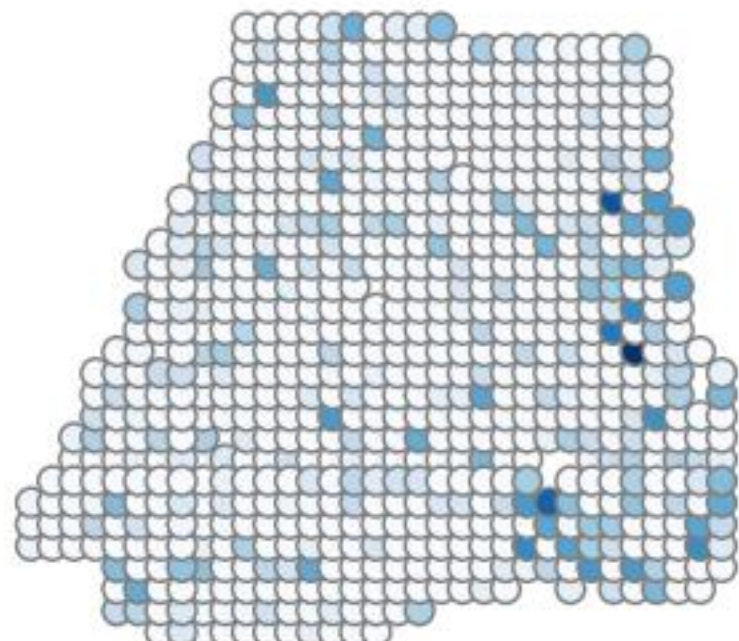

Plasma Cells

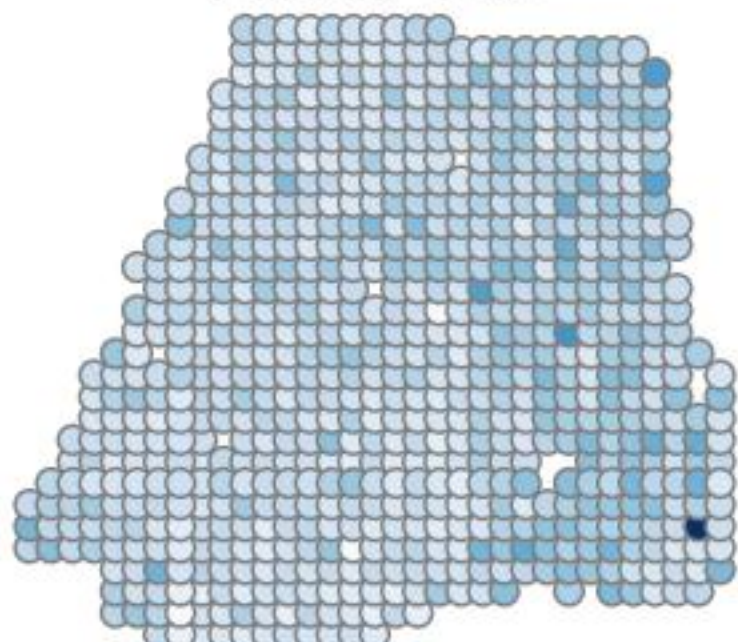

PVL Differentiated

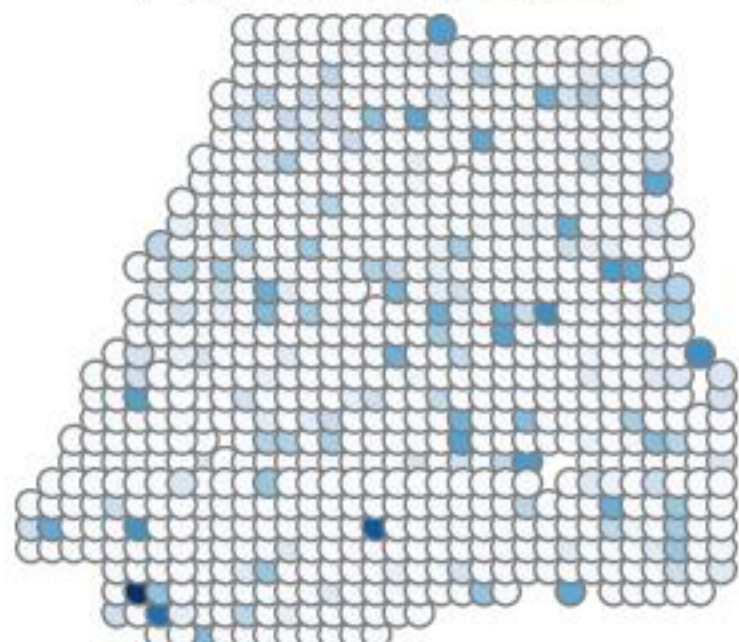

PVL Immature

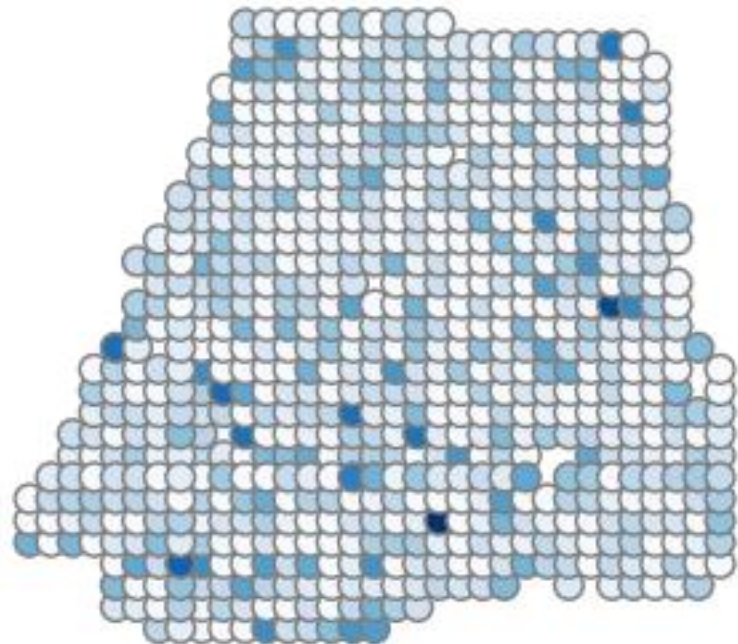

CD4+ T-cells

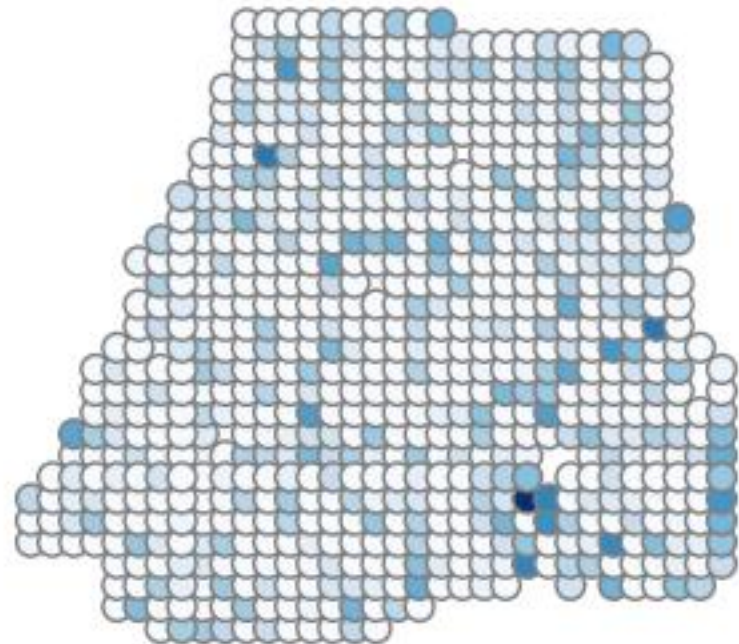

CD8+ T-cells

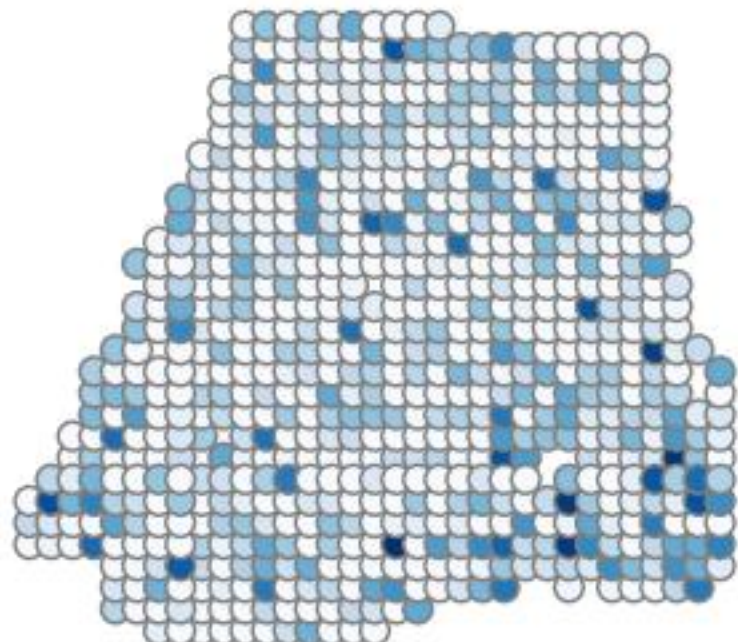

Cycling T-cells

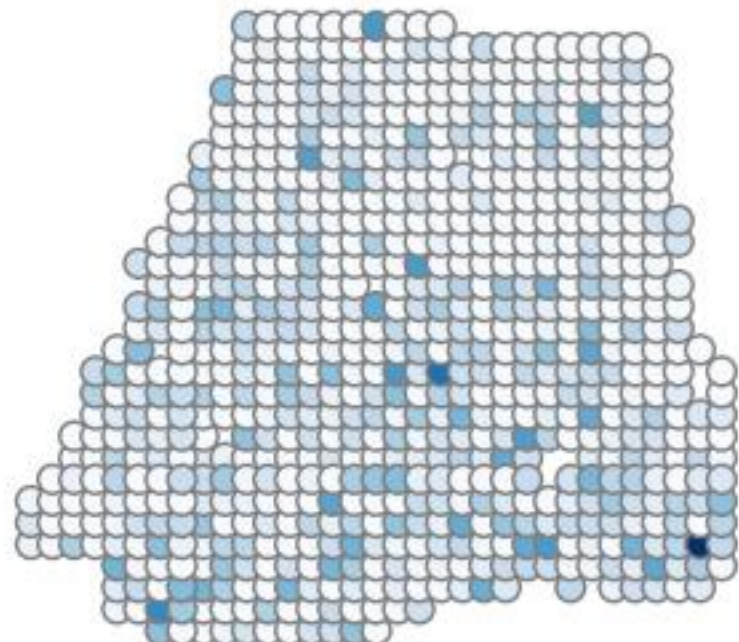

NK cells

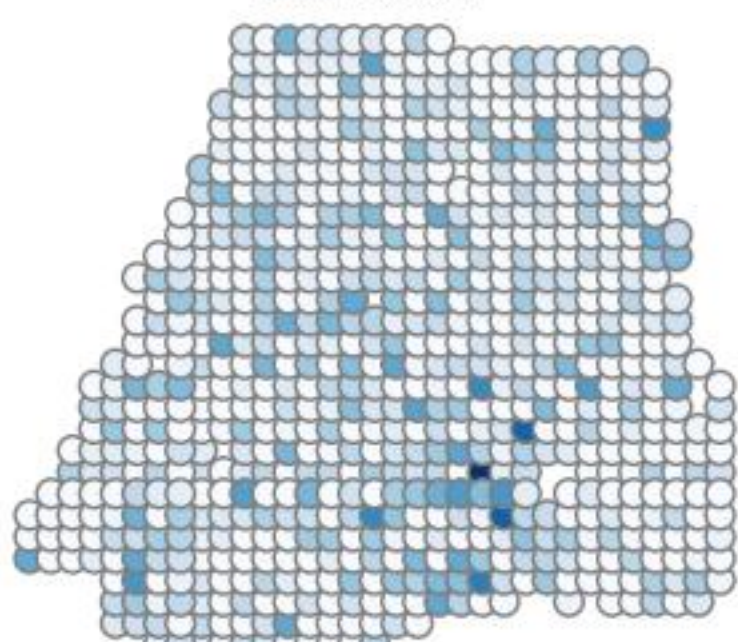

NKT cells

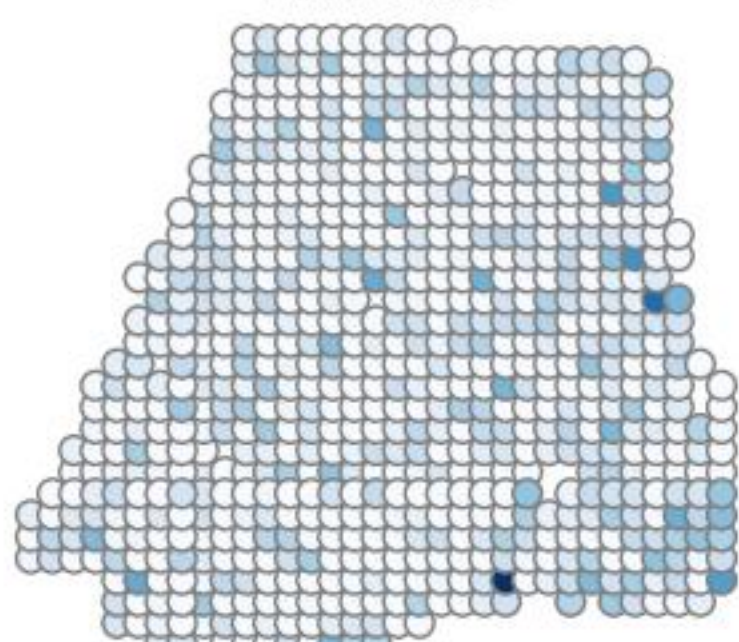

# minor\_A3

B-cells Memory

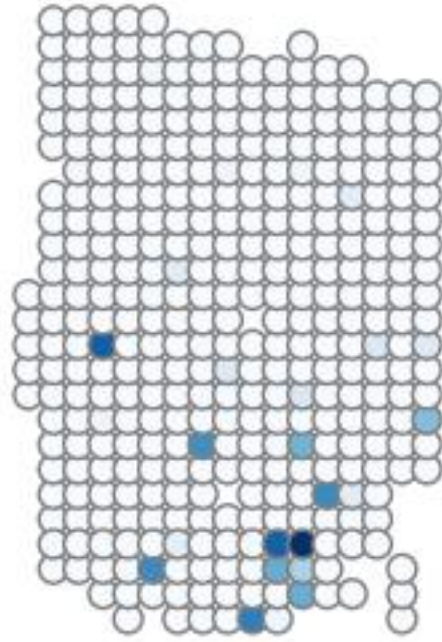

B-cells Naive

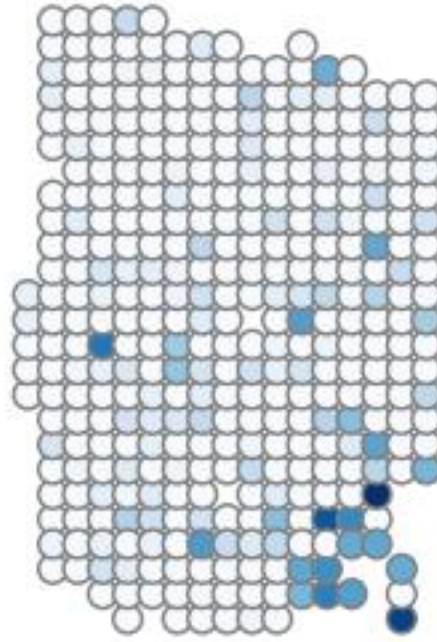

CAFs MSC/iCAF-like

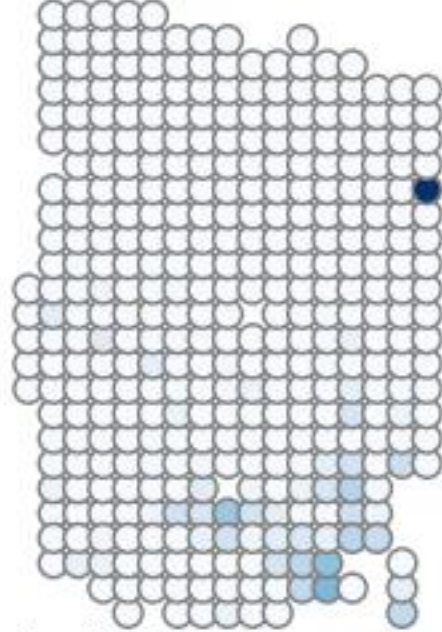

CAFs myCAF-like

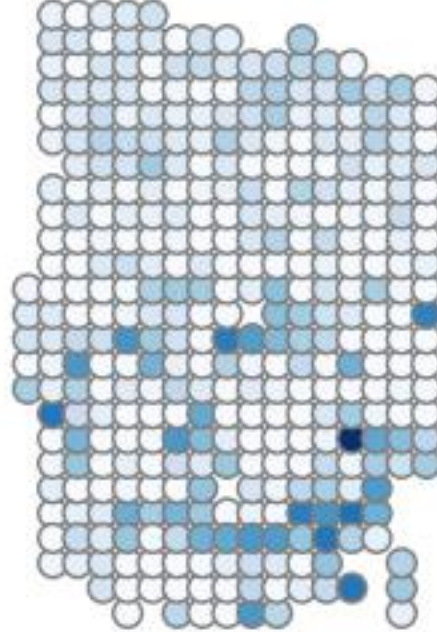

Endothelial Lymphatic  
LYVE1

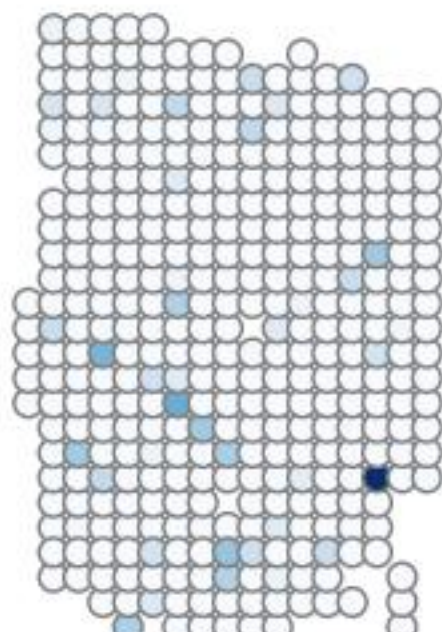

Endothelial RGS5

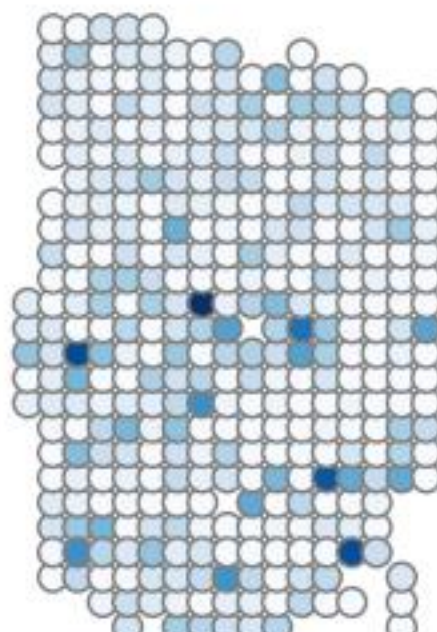

Endothelial CXCL12

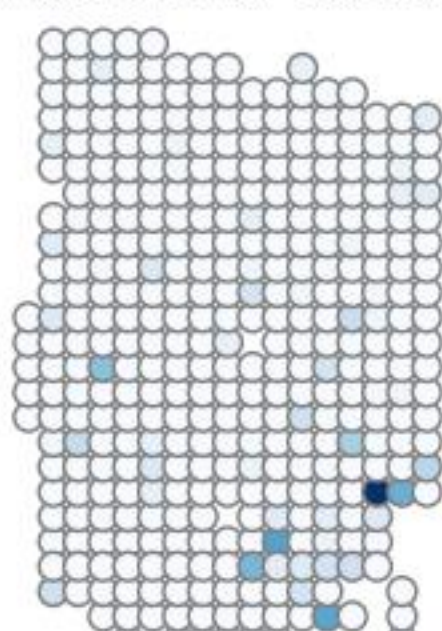

Endothelial ACKR1

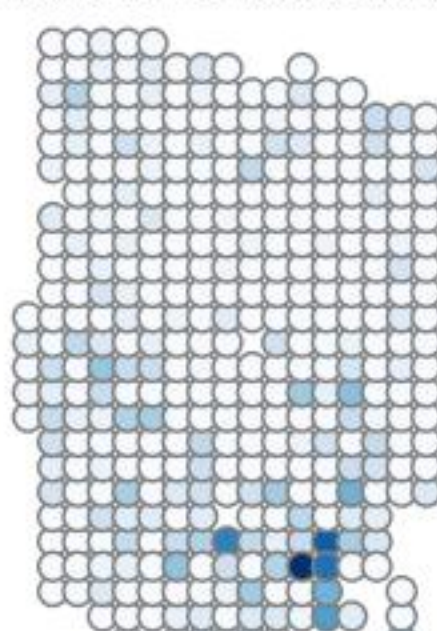

Cancer Epithelial

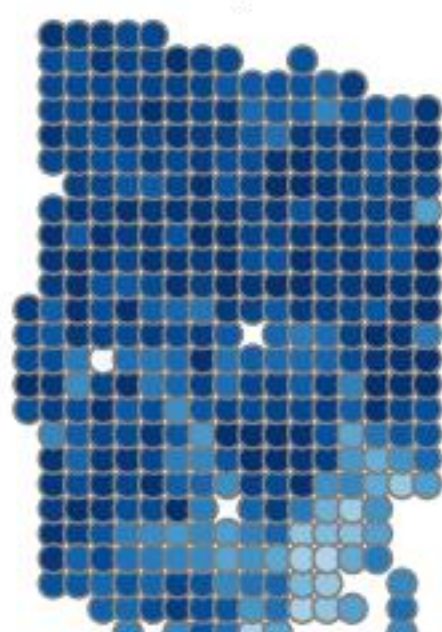

Normal Epithelial

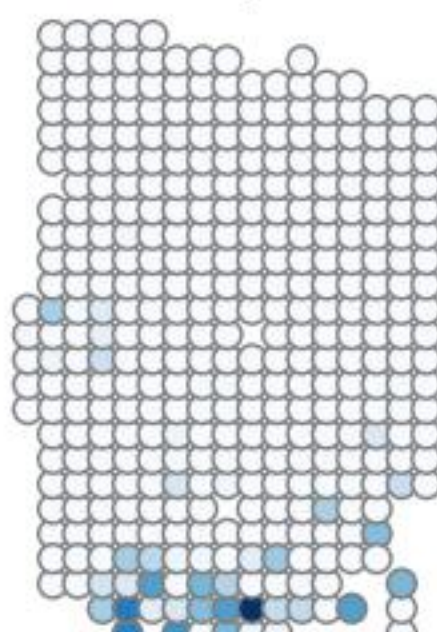

Cycling Myeloid

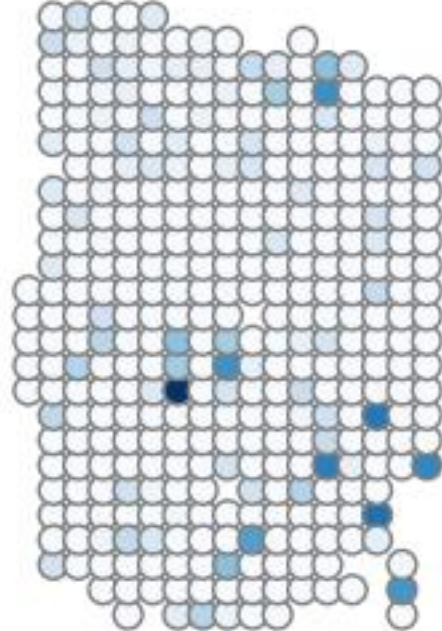

DCs

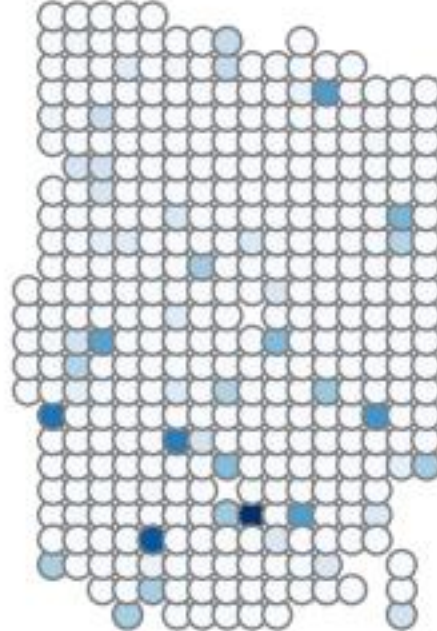

Macrophages

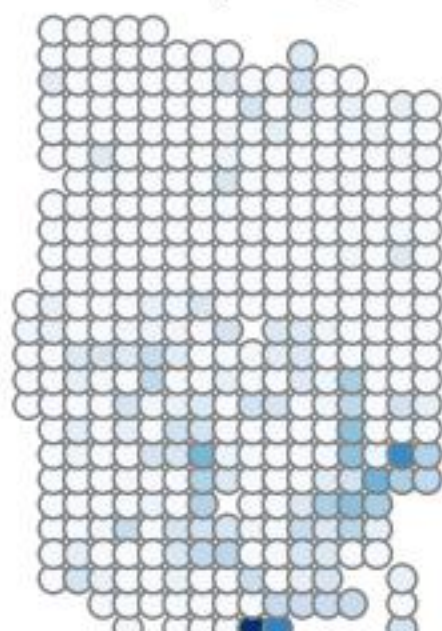

Monocytes

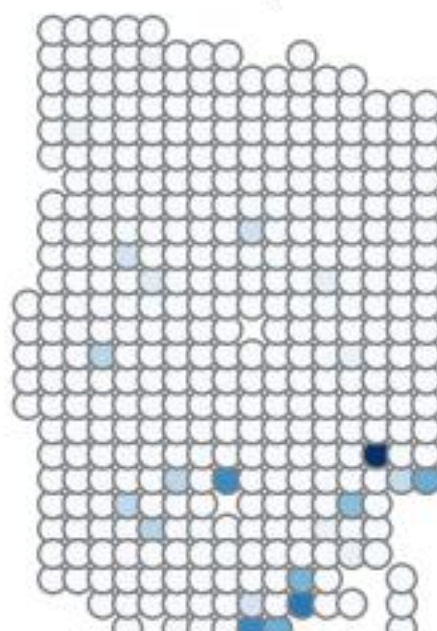

Plasma Cells

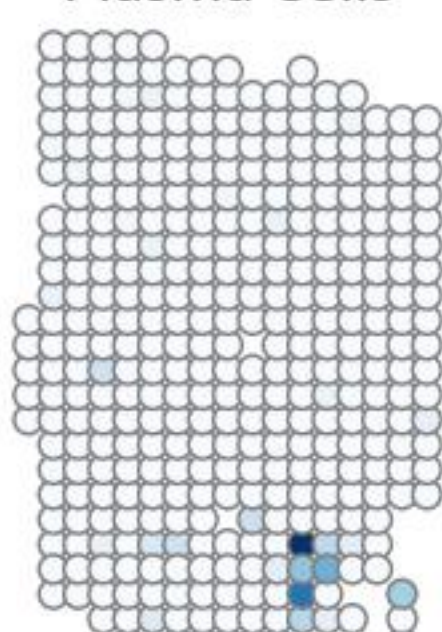

PVL Differentiated

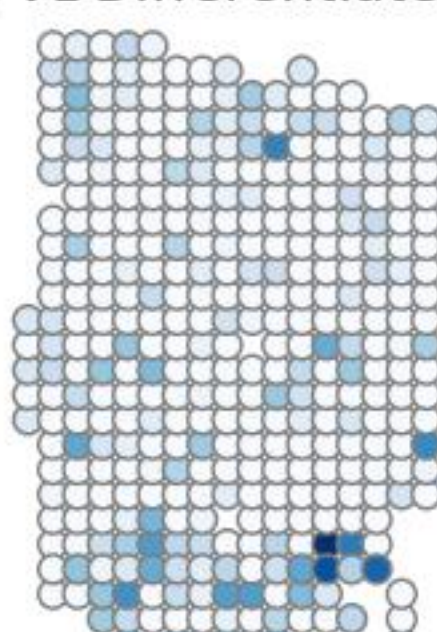

PVL Immature

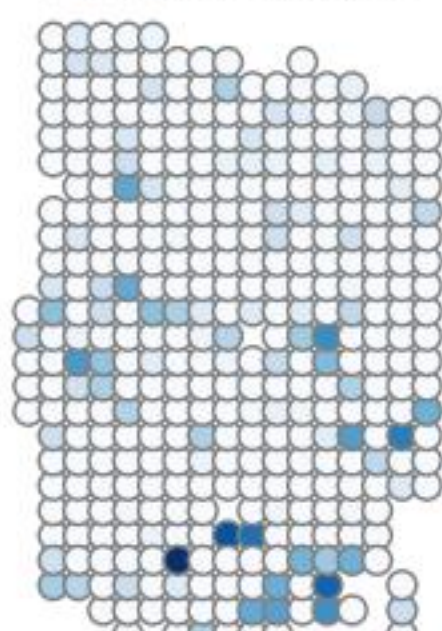

CD4+ T-cells

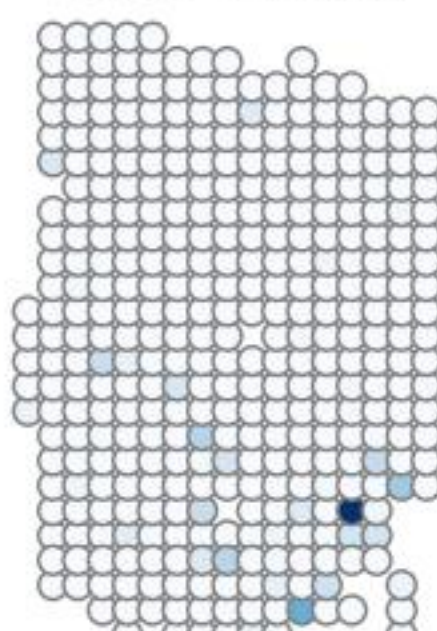

CD8+ T-cells

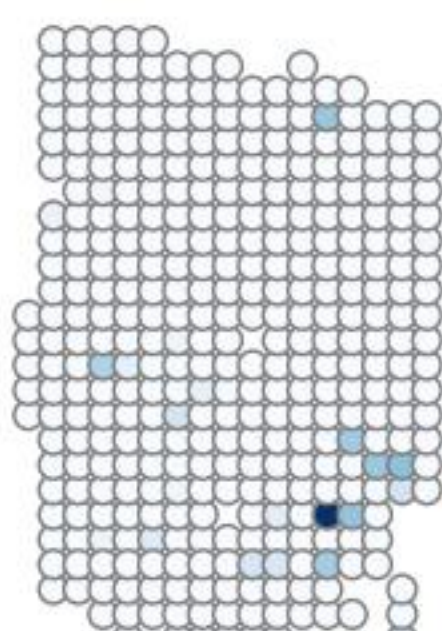

Cycling T-cells

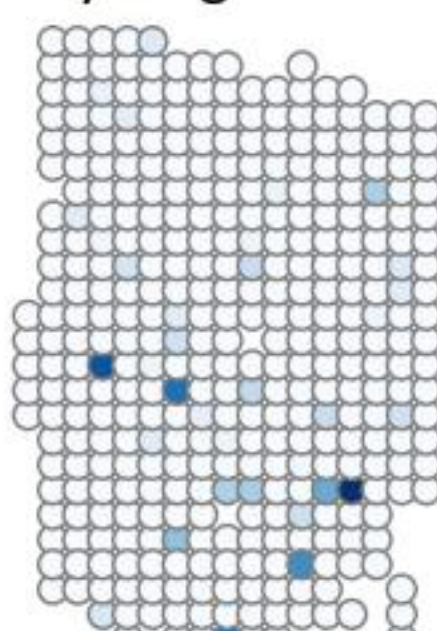

NK cells

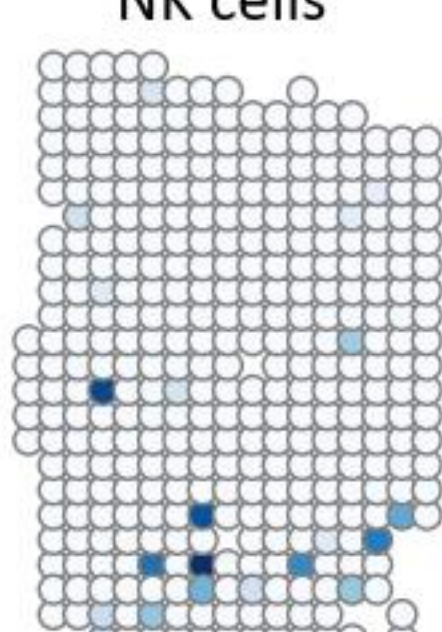

NKT cells

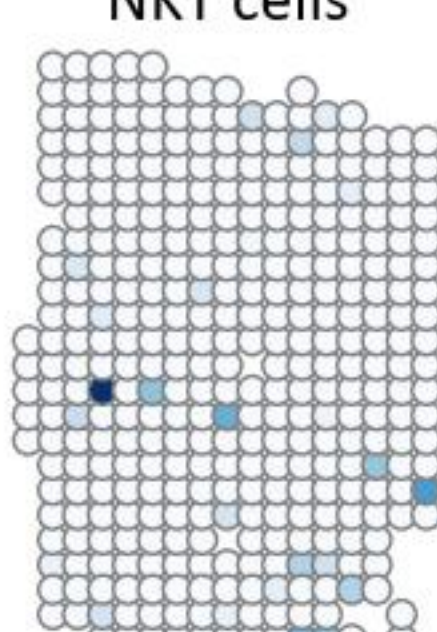

# minor\_D5

B-cells Memory

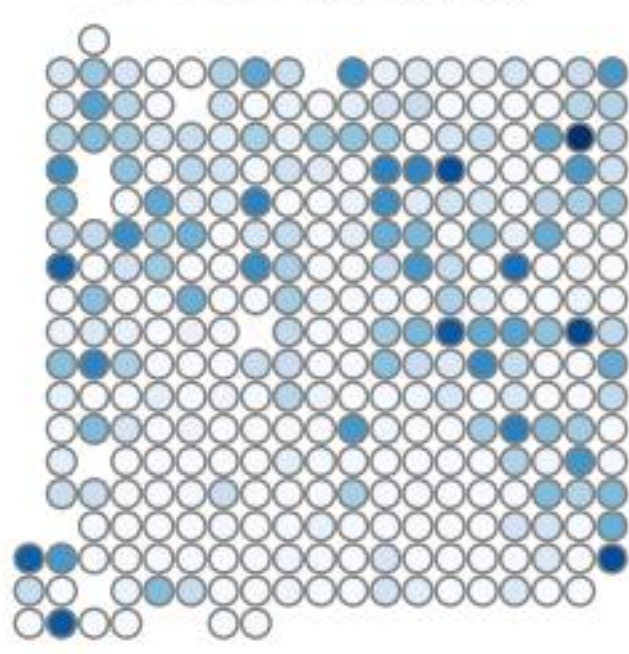

B-cells Naive

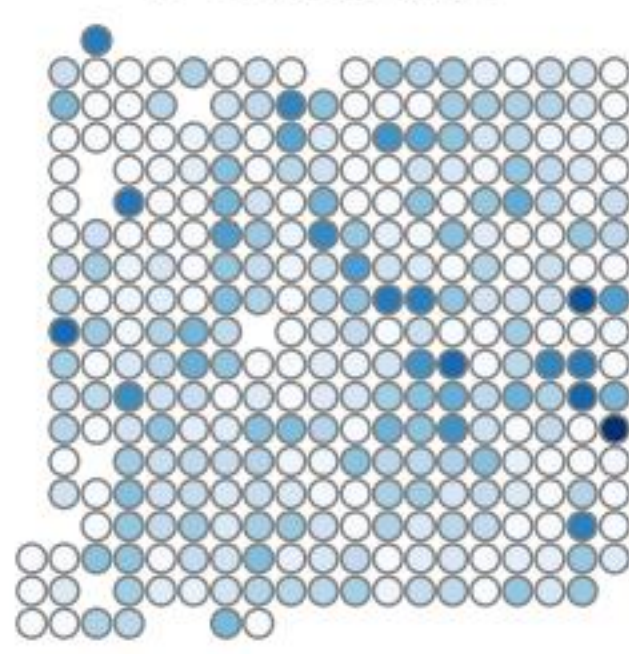

CAFs MSC/iCAF-like

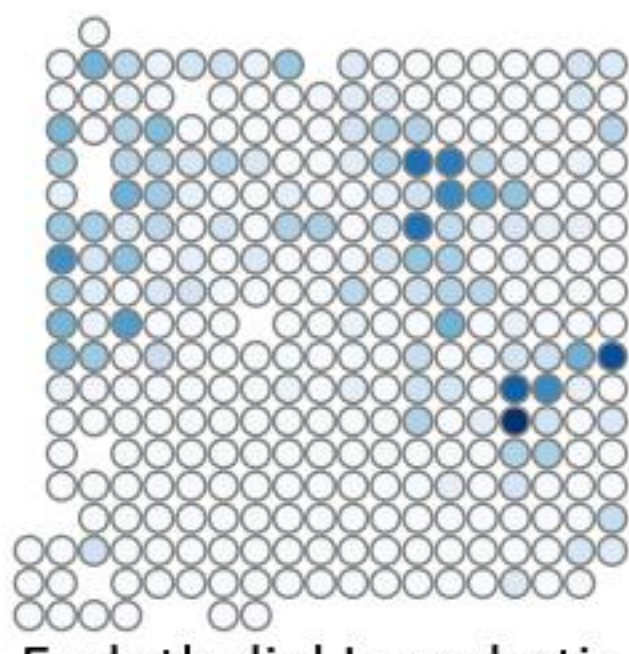

CAFs myCAF-like

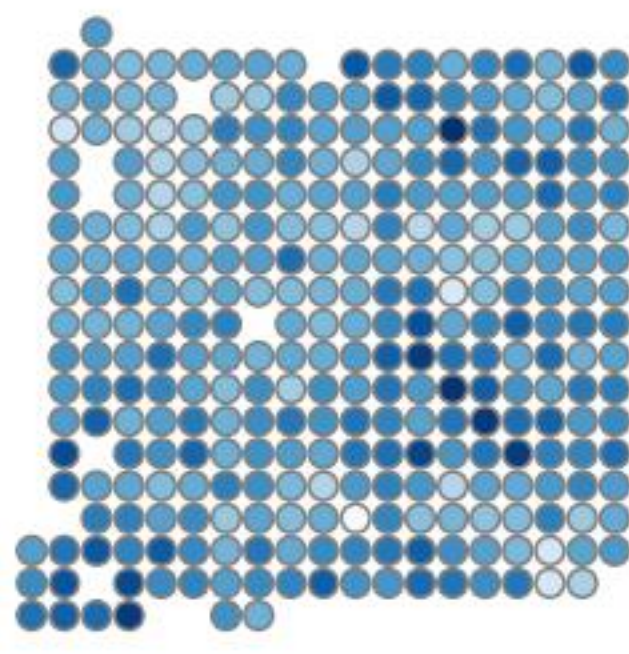

Endothelial Lymphatic LYVE1

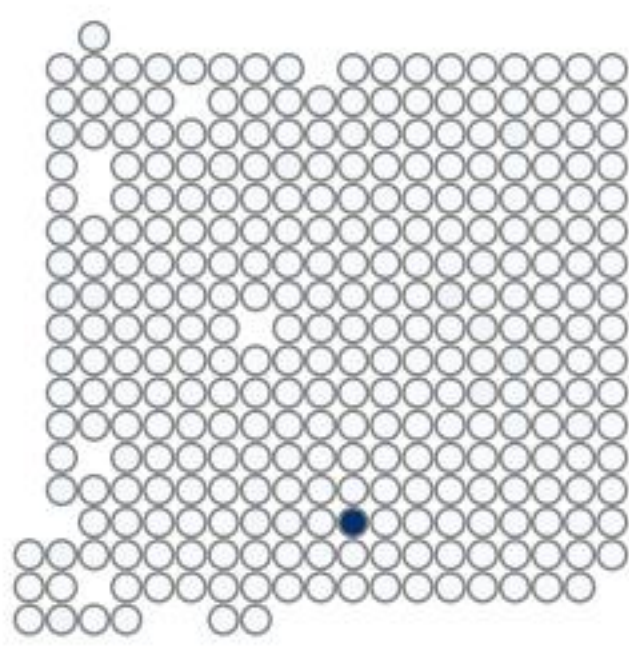

Endothelial RGS5

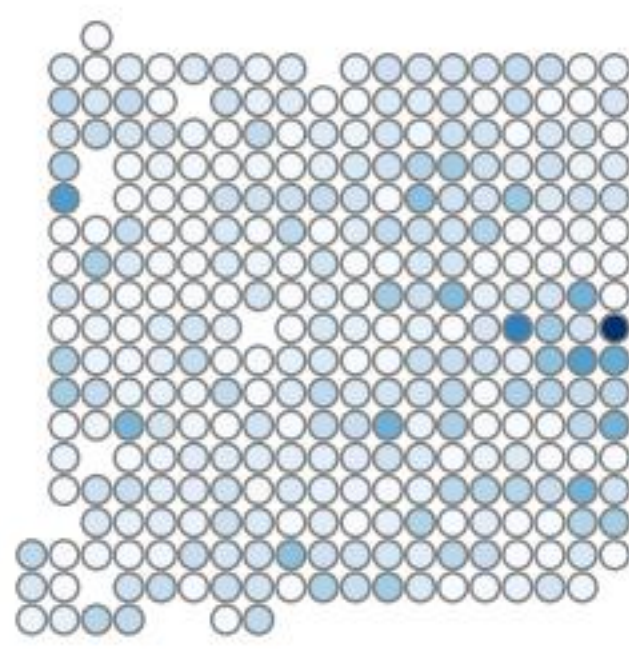

Endothelial CXCL12

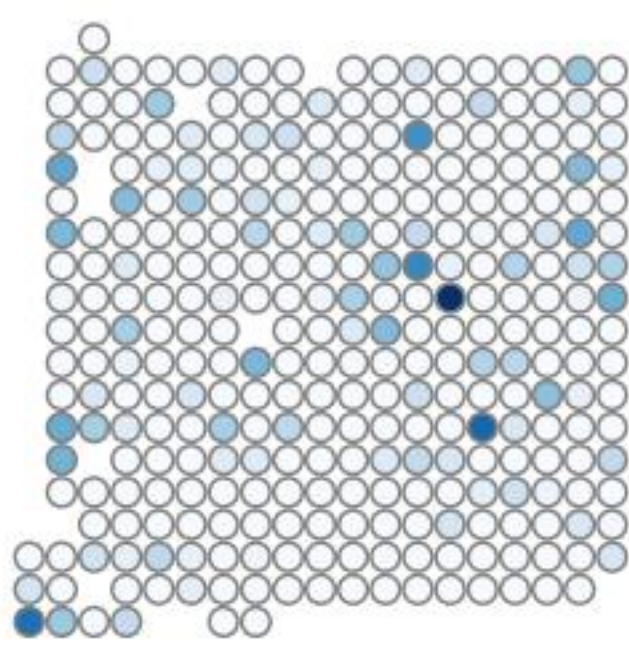

Endothelial ACKR1

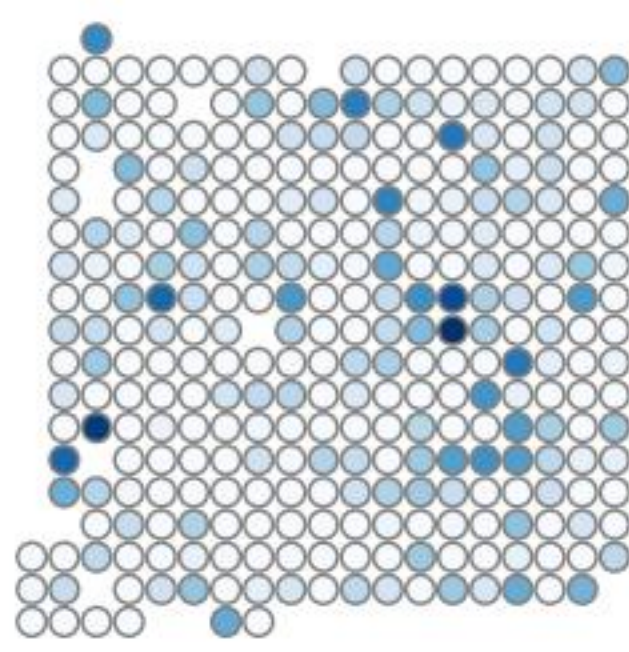

Cancer Epithelial

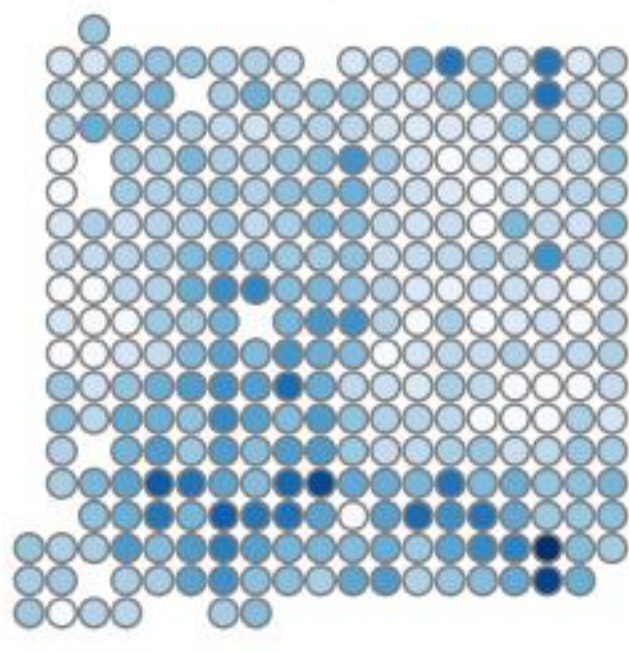

Normal Epithelial

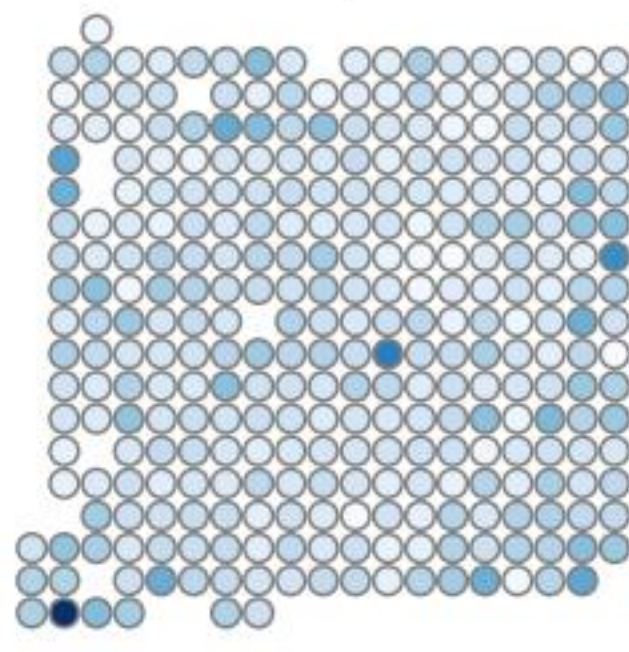

Cycling Myeloid

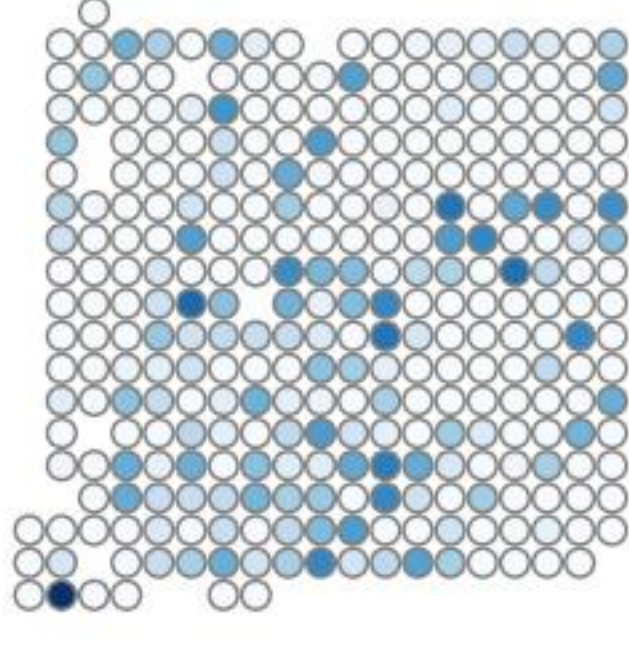

DCs

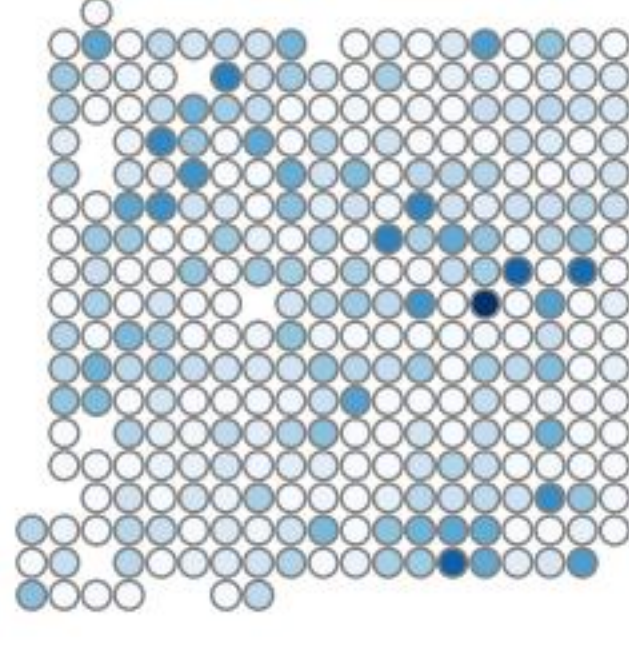

Macrophages

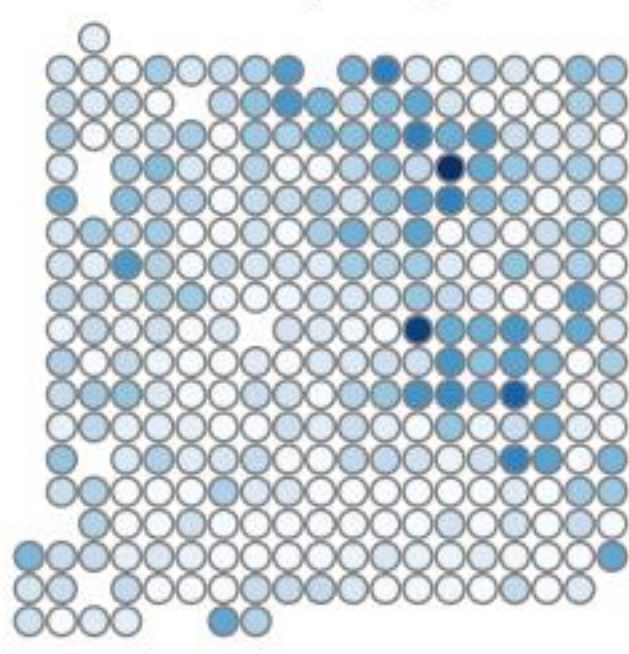

Monocytes

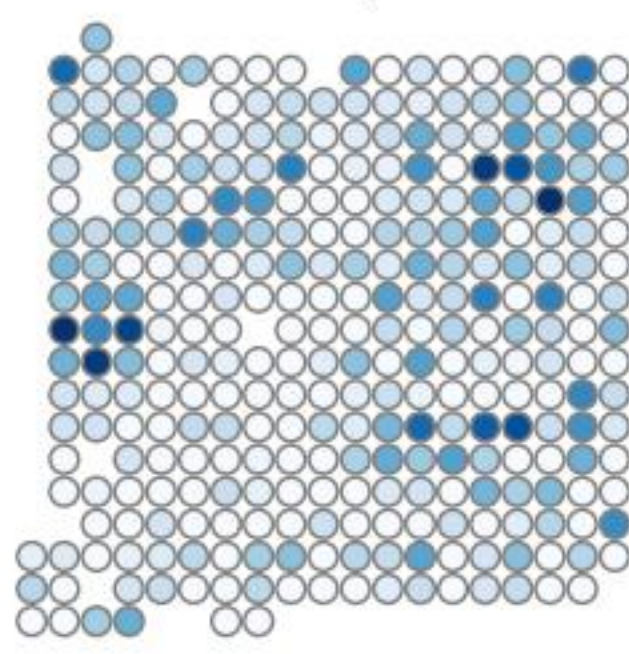

Plasma Cells

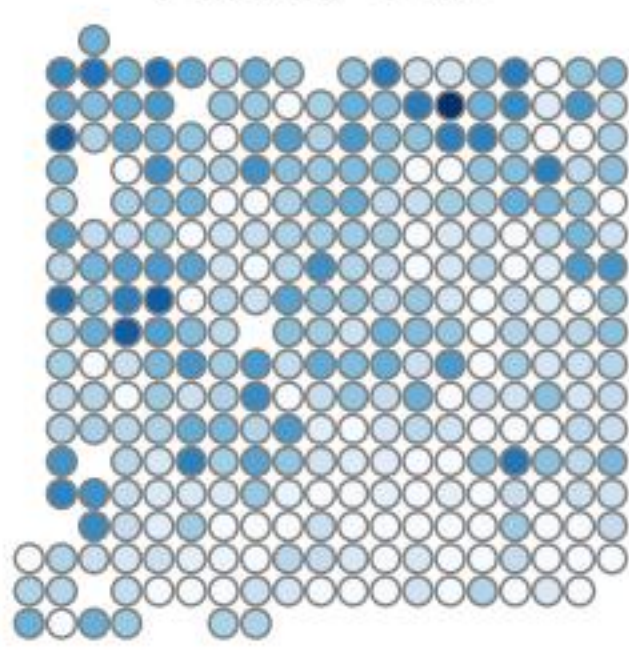

PVL Differentiated

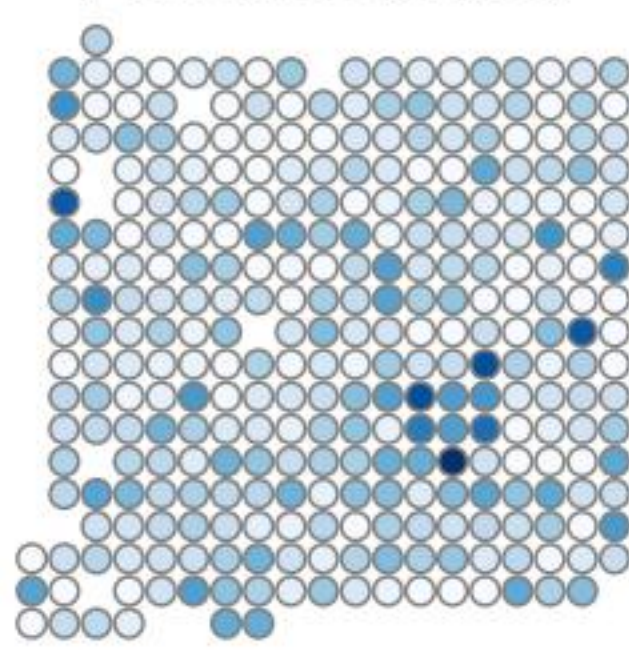

PVL Immature

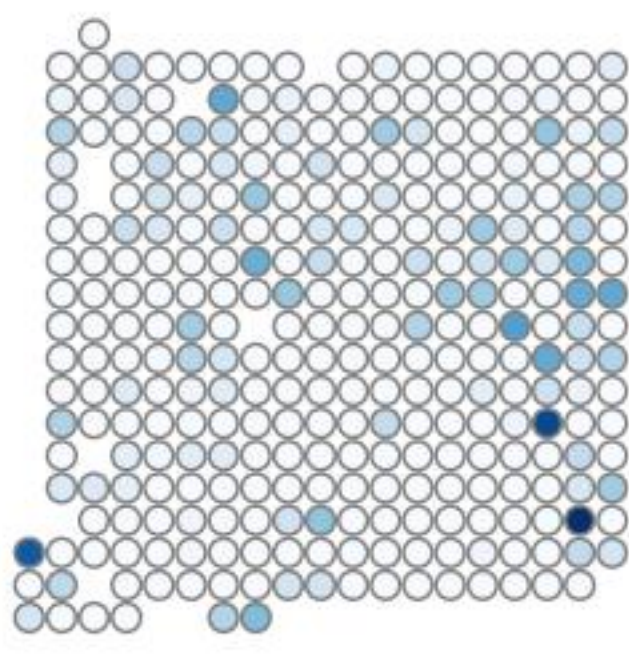

CD4+ T-cells

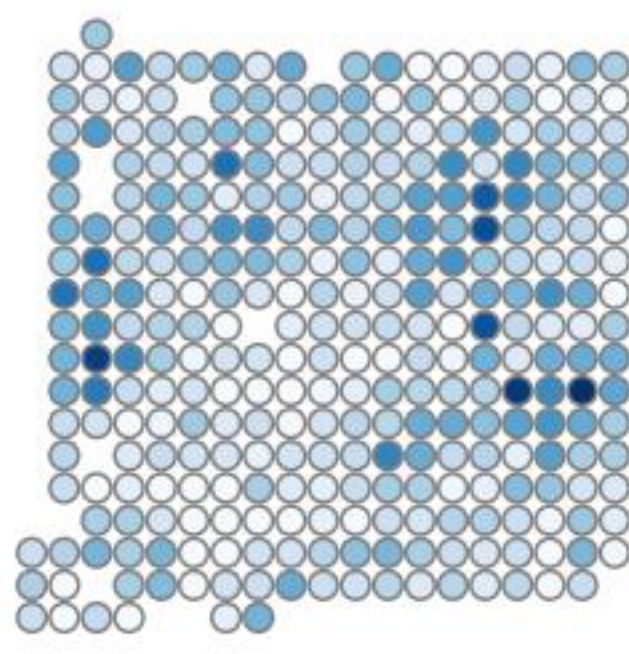

CD8+ T-cells

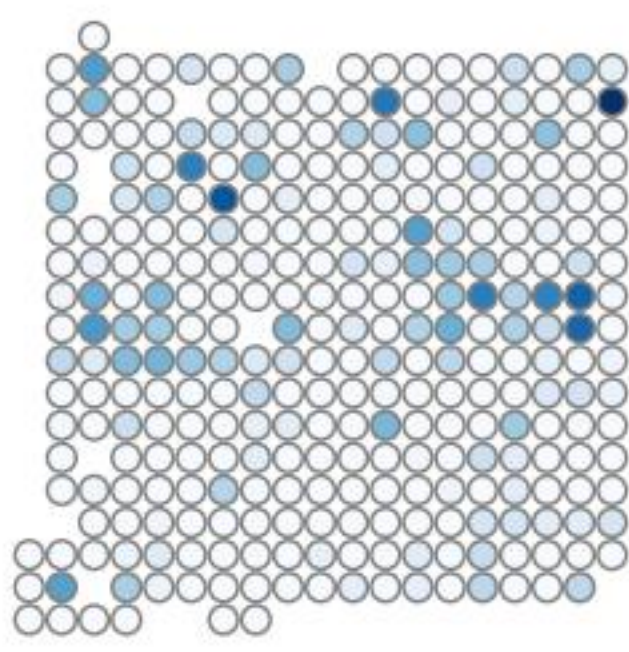

Cycling T-cells

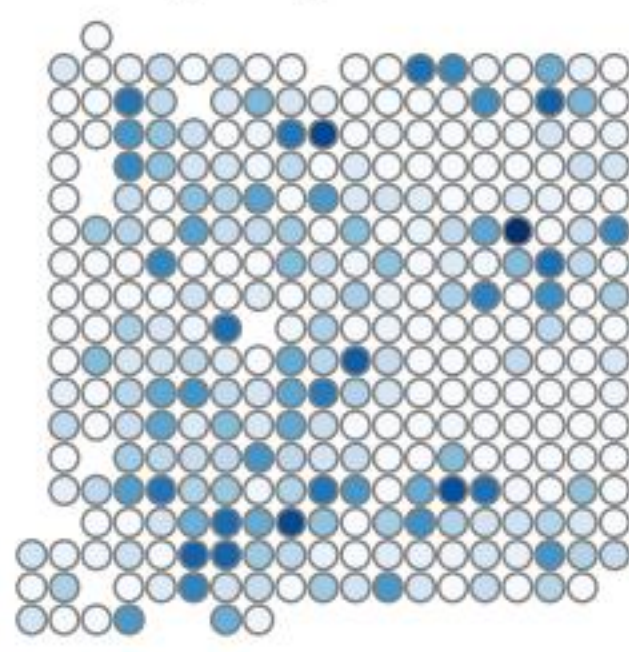

NK cells

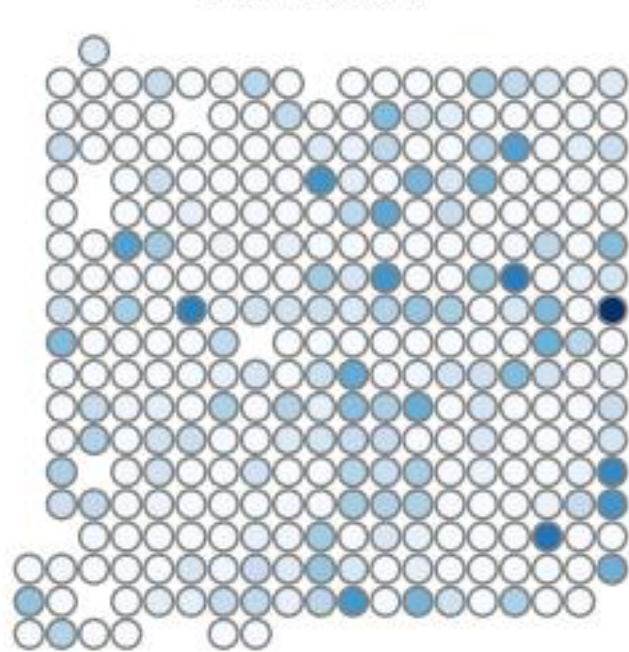

NKT cells

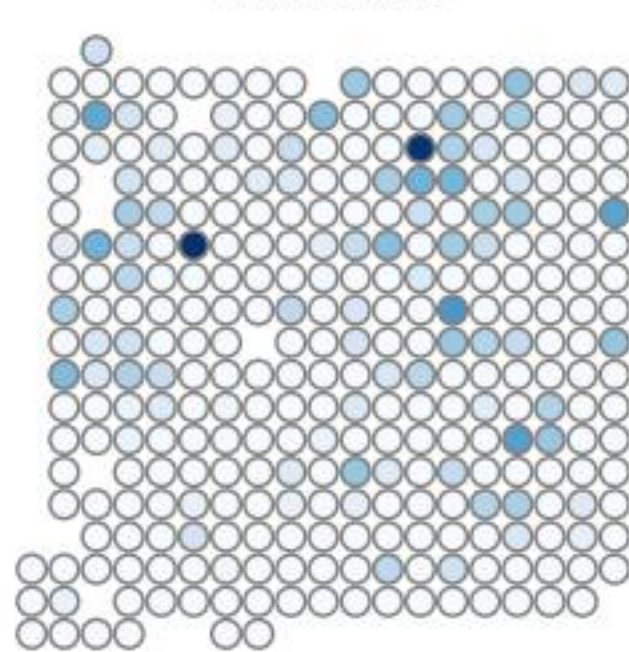

# minor\_F2

B-cells Memory

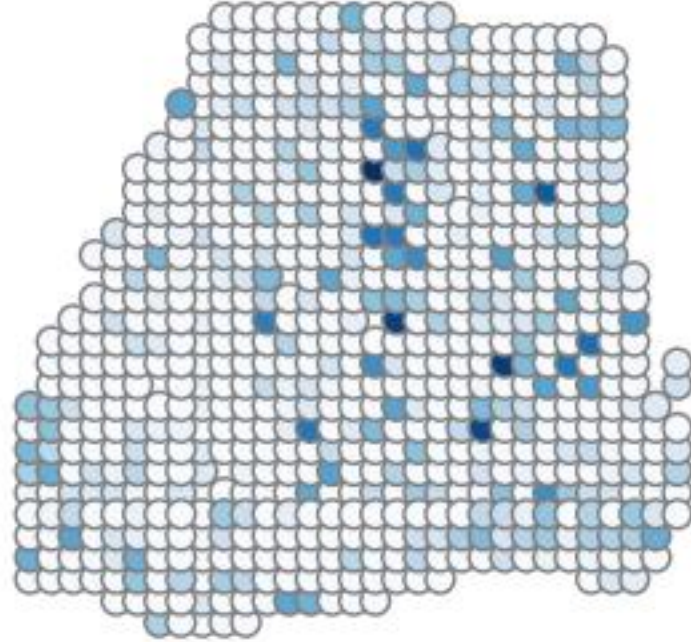

B-cells Naive

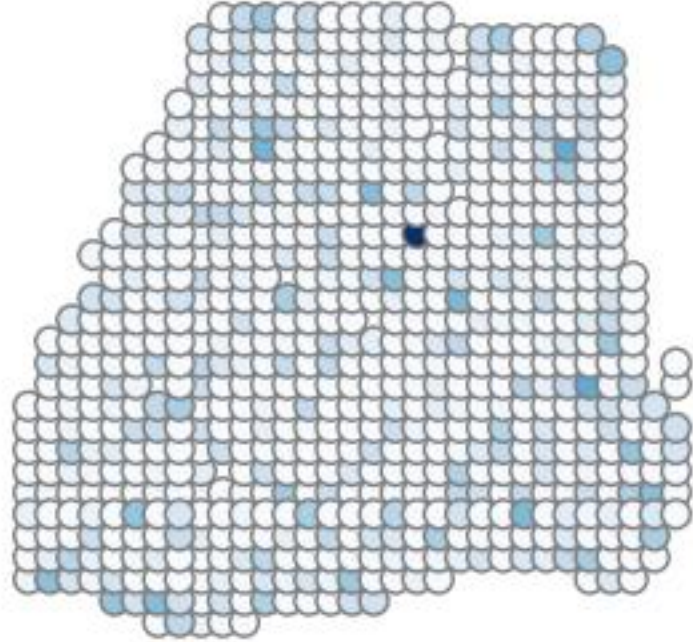

CAFs MSC/iCAF-like

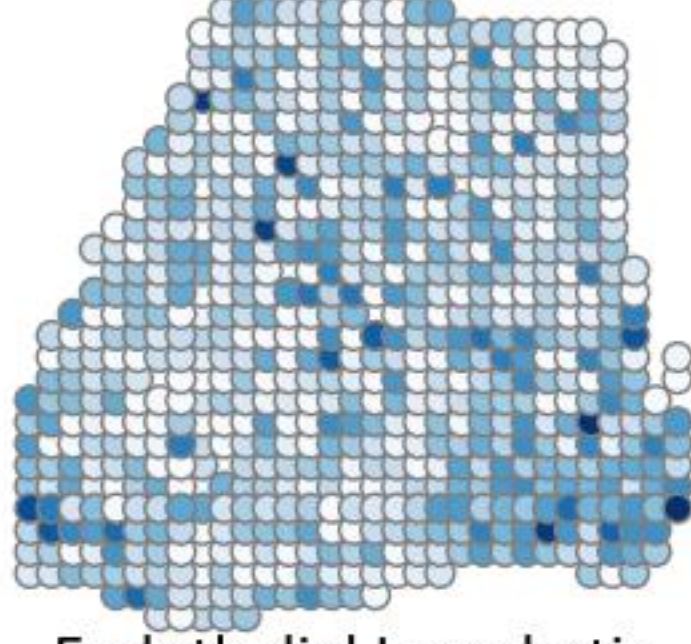

CAFs myCAF-like

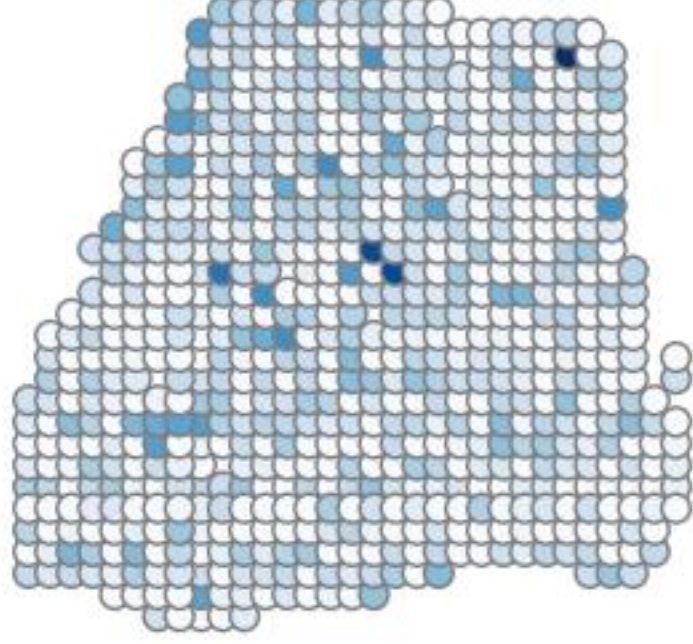

Endothelial Lymphatic  
LYVE1

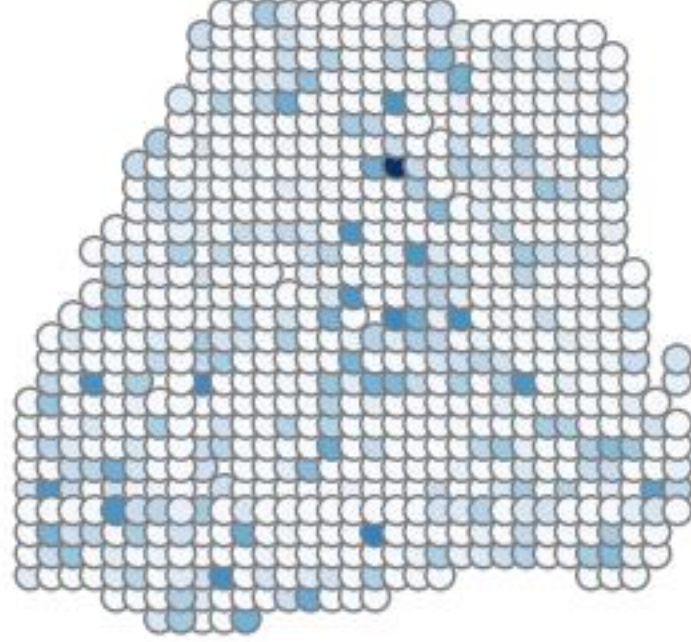

Endothelial RGS5

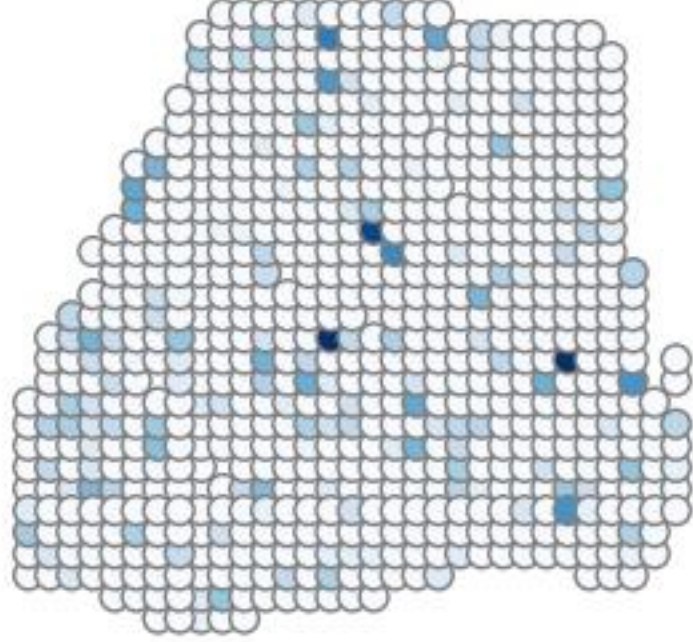

Endothelial CXCL12

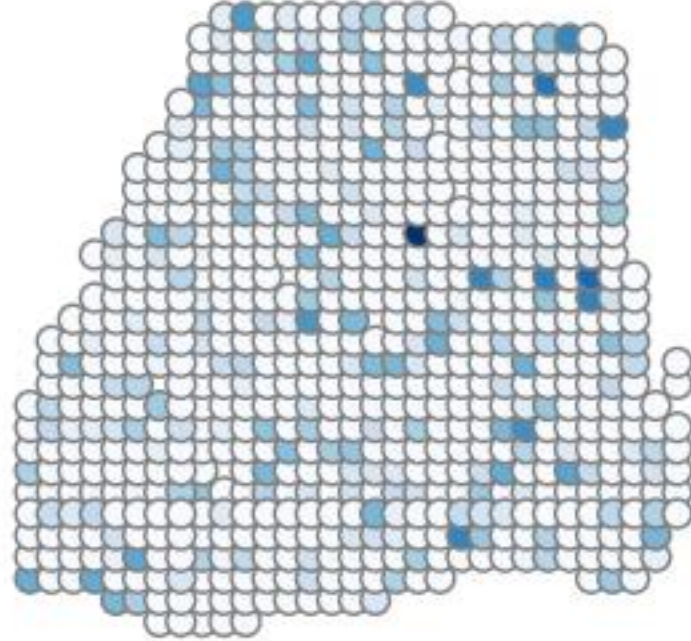

Endothelial ACKR1

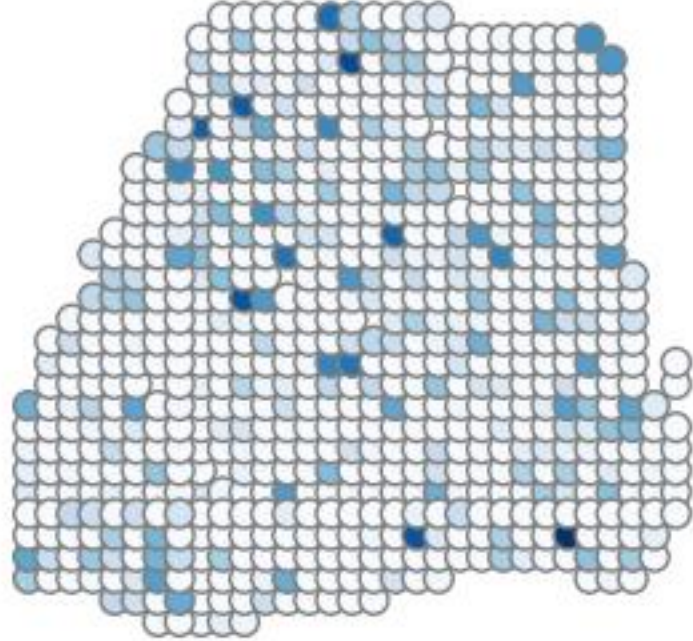

Cancer Epithelial

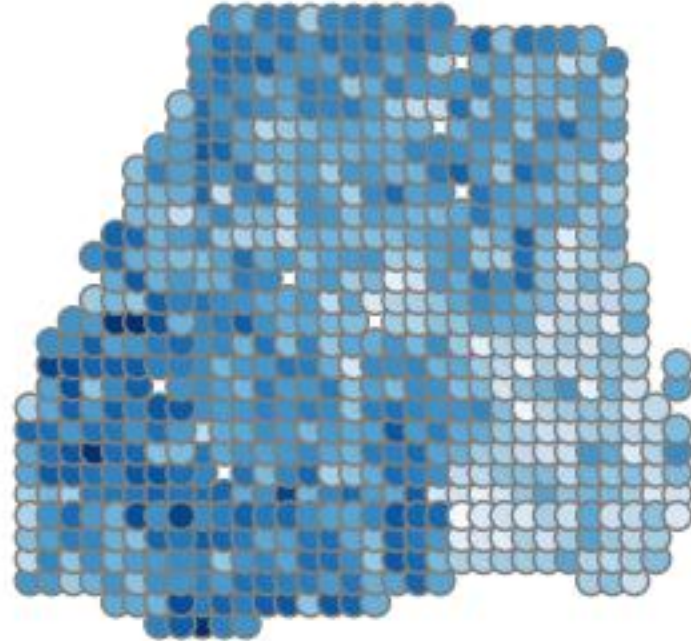

Normal Epithelial

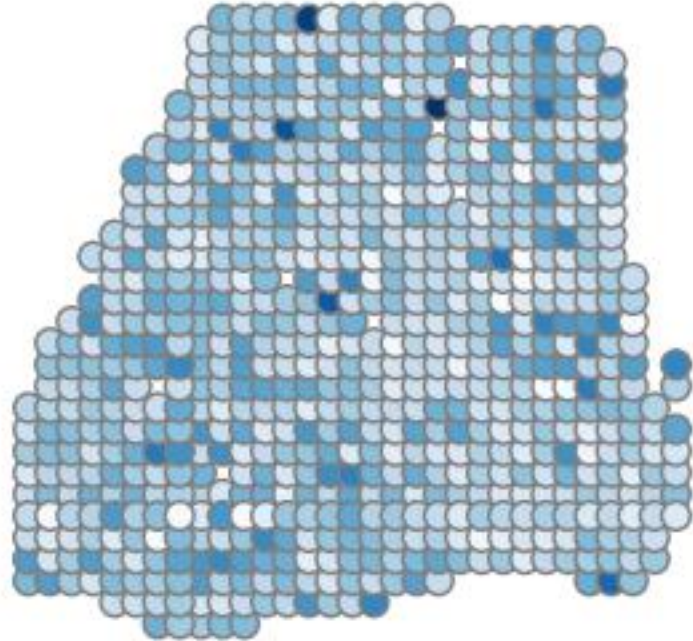

Cycling Myeloid

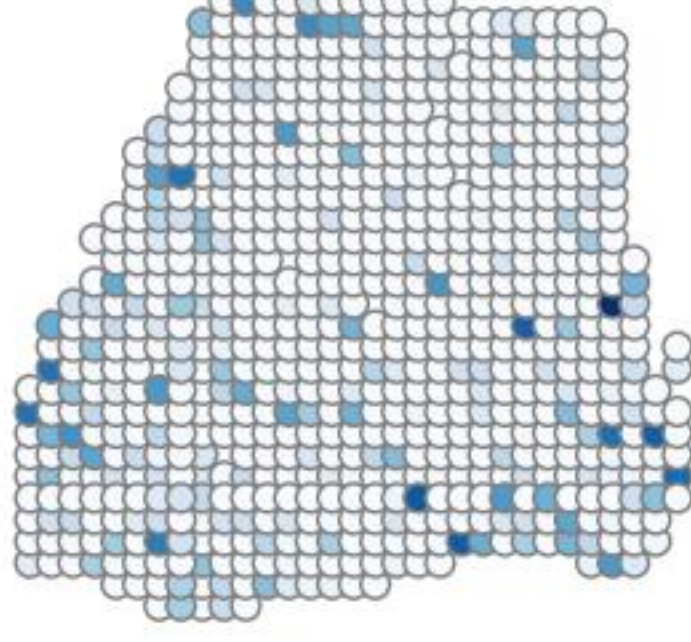

DCs

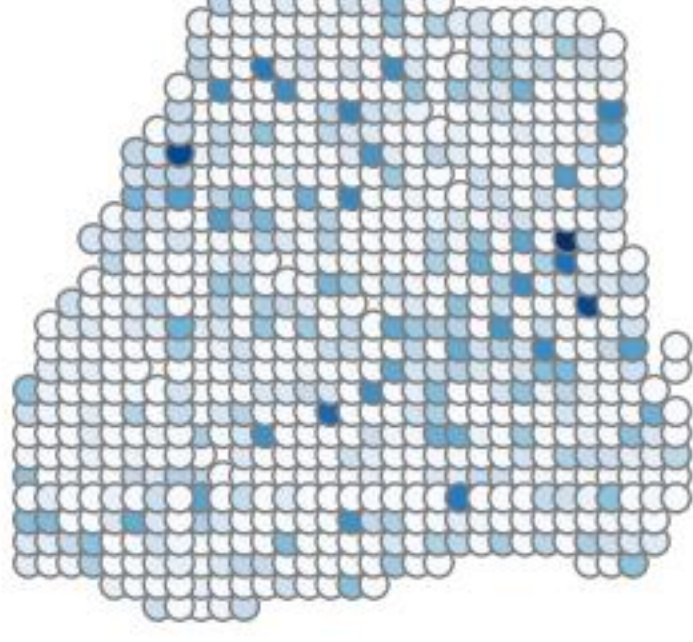

Macrophages

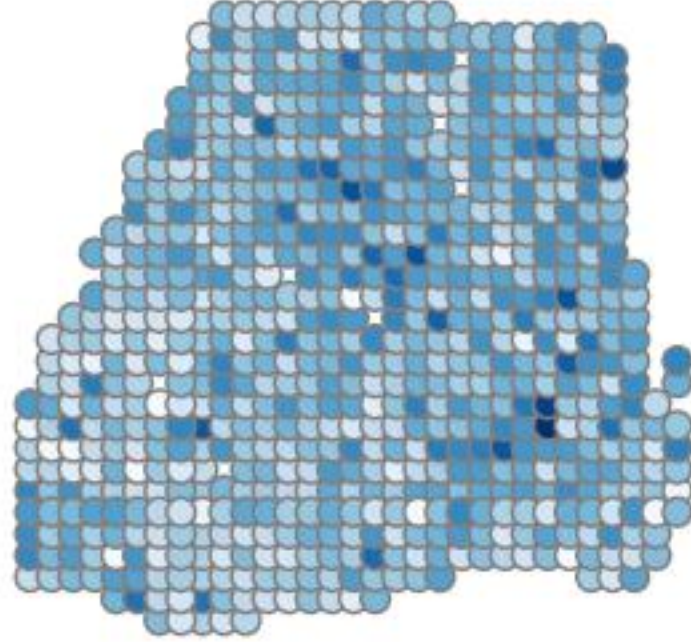

Monocytes

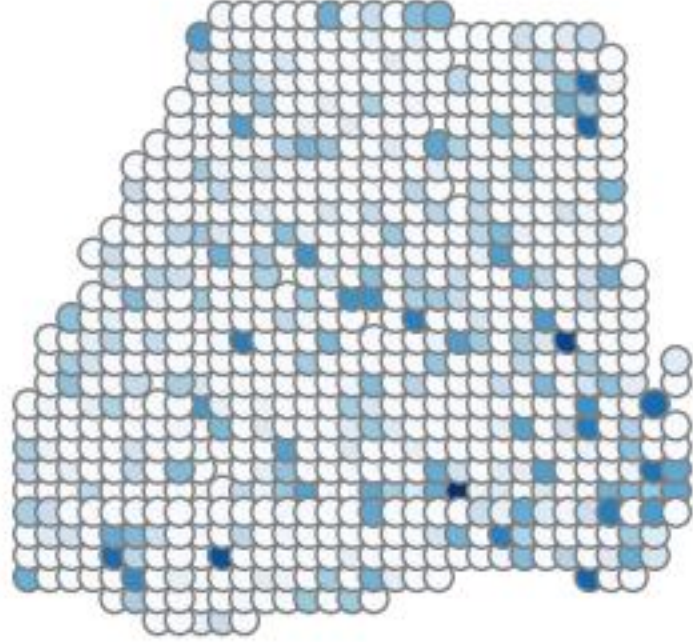

Plasma Cells

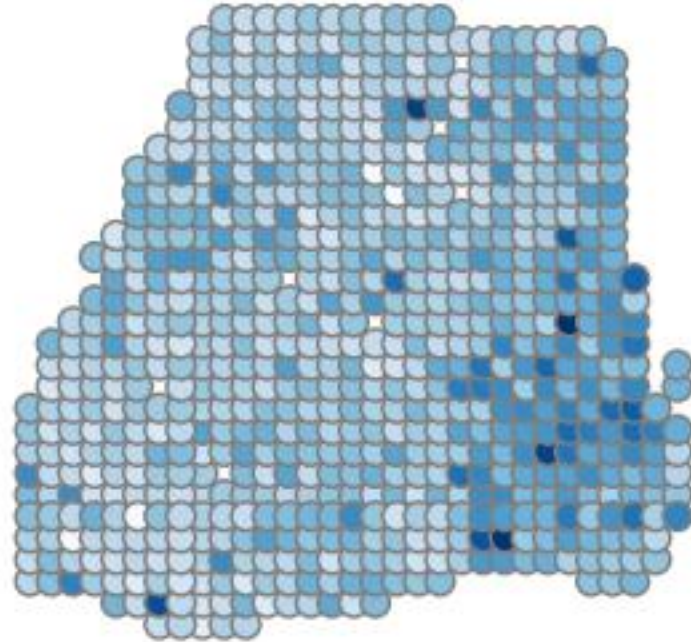

PVL Differentiated

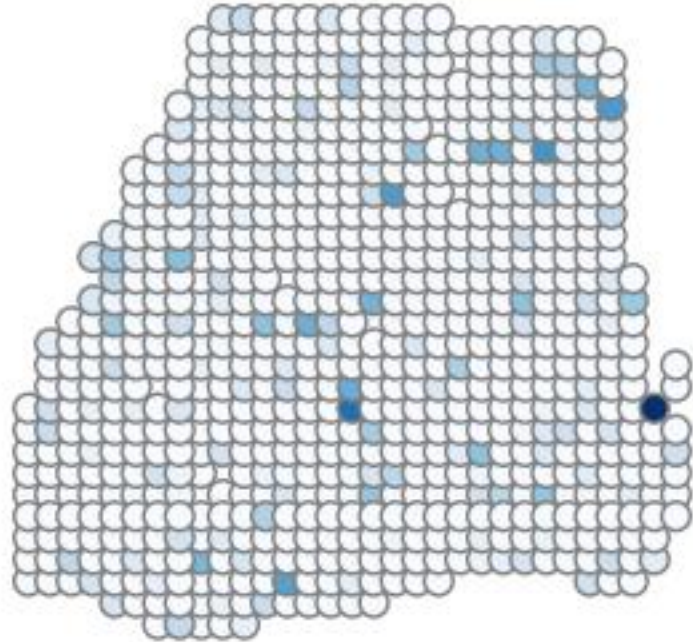

PVL Immature

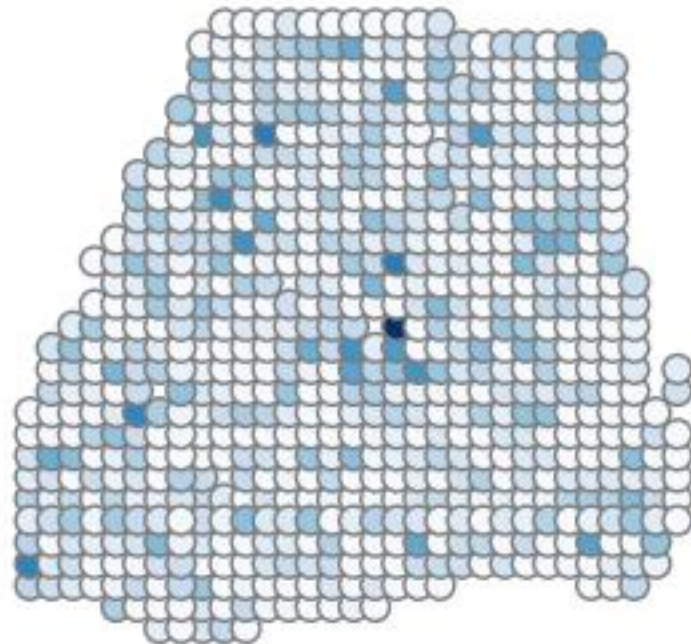

CD4+ T-cells

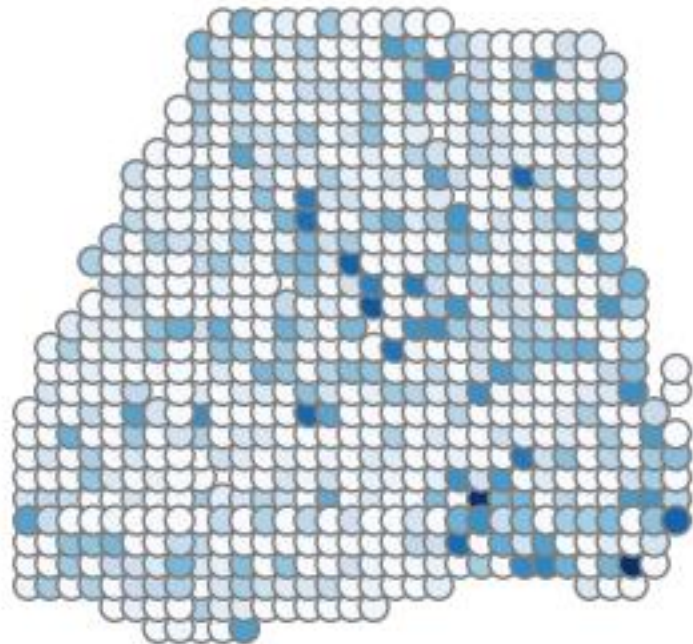

CD8+ T-cells

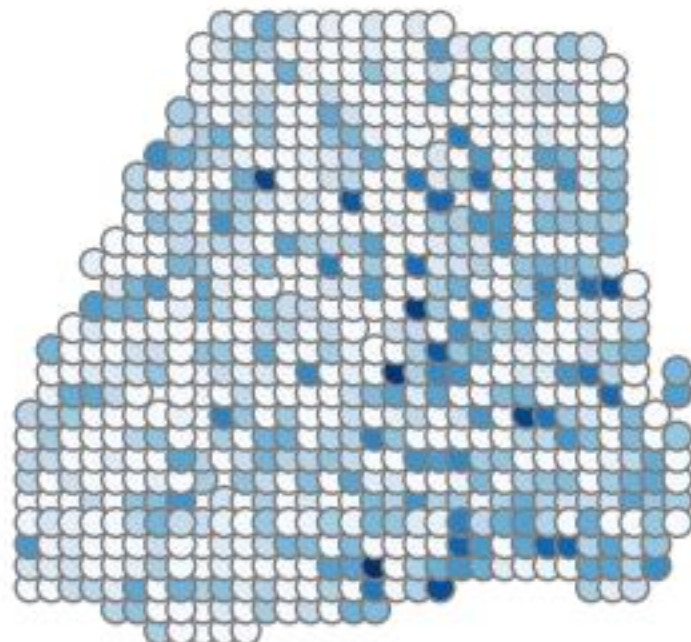

Cycling T-cells

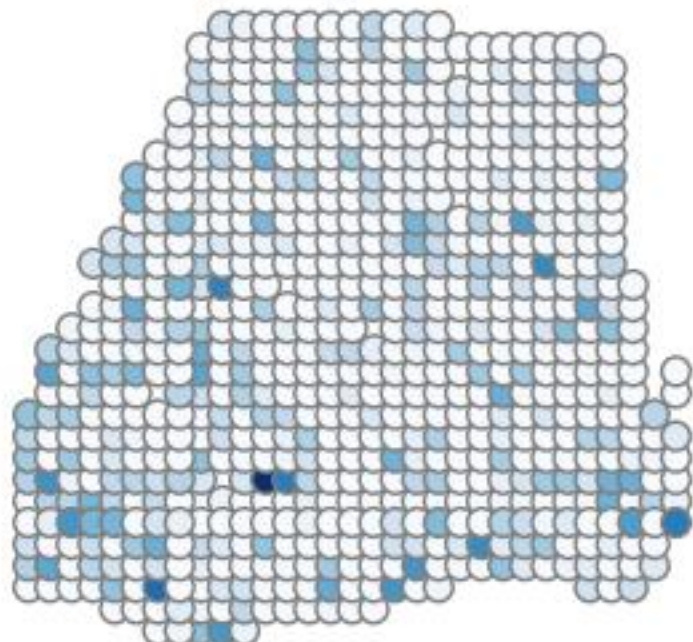

NK cells

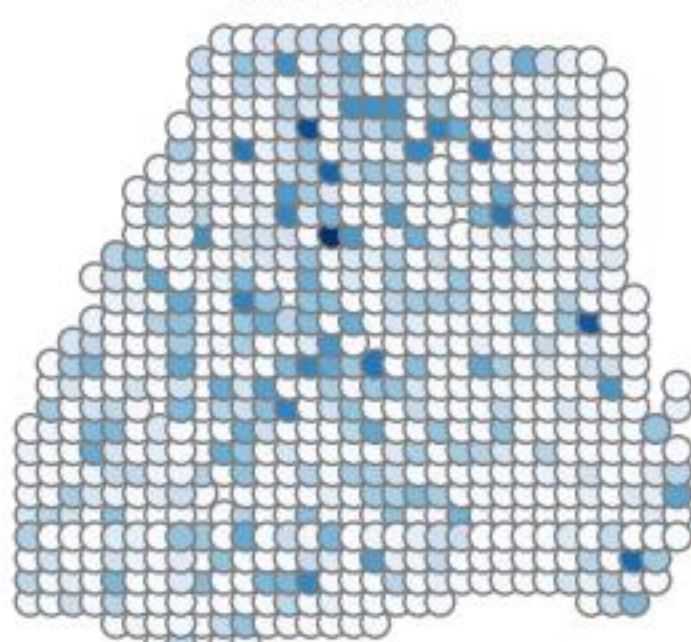

NKT cells

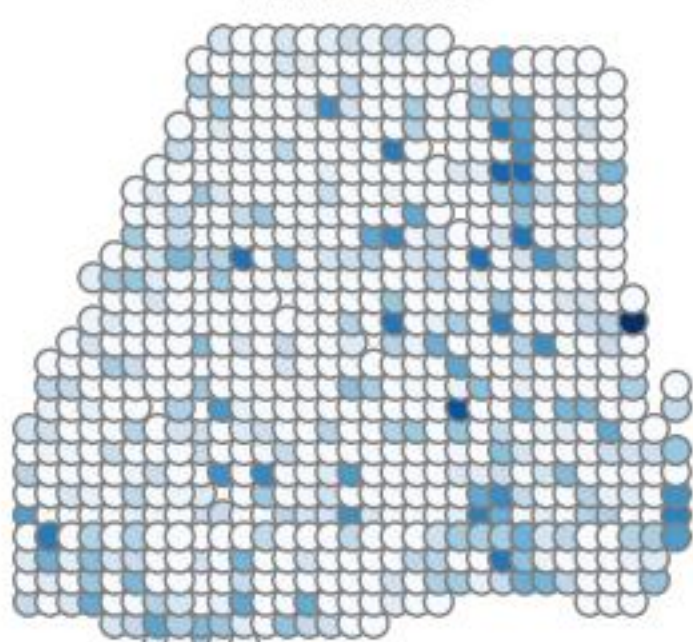

# minor\_G3

B-cells Memory

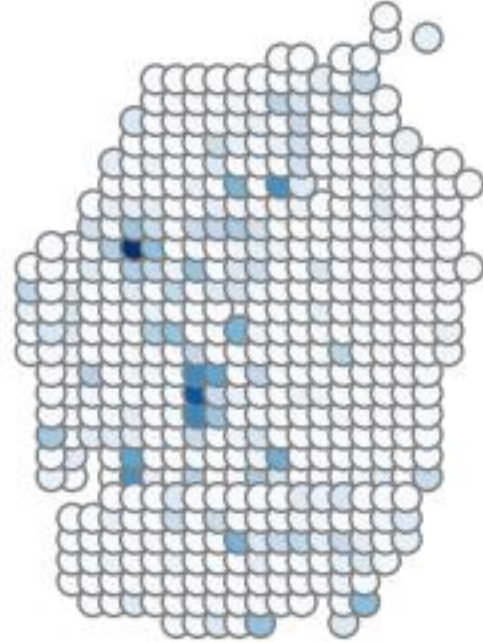

B-cells Naive

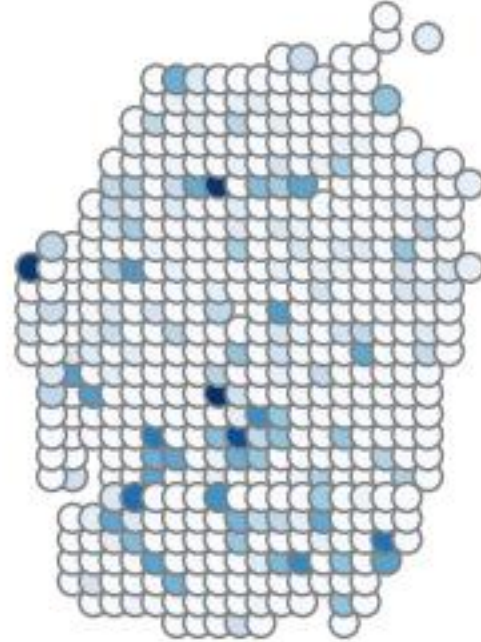

CAFs MSC/iCAF-like

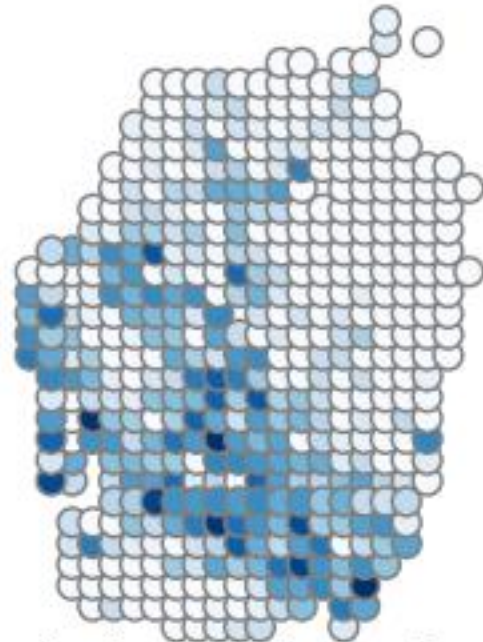

CAFs myCAF-like

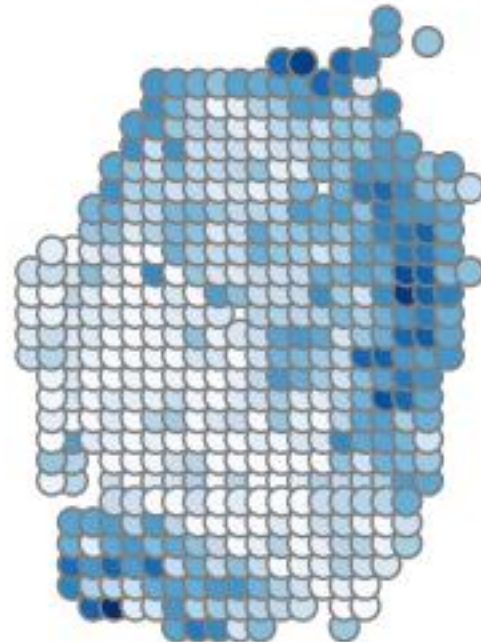

Endothelial Lymphatic  
LYVE1

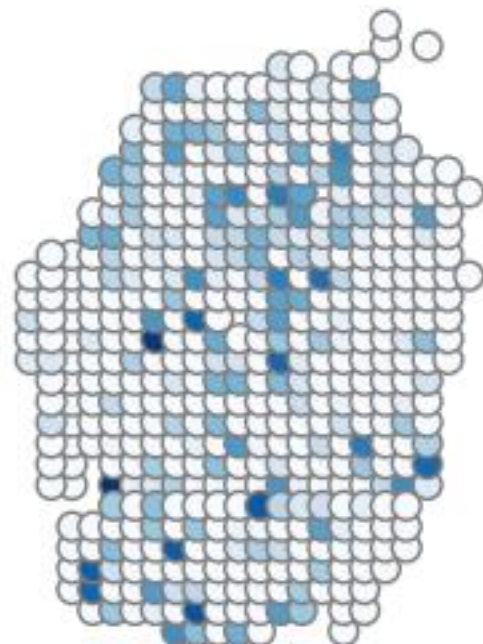

Endothelial RGS5

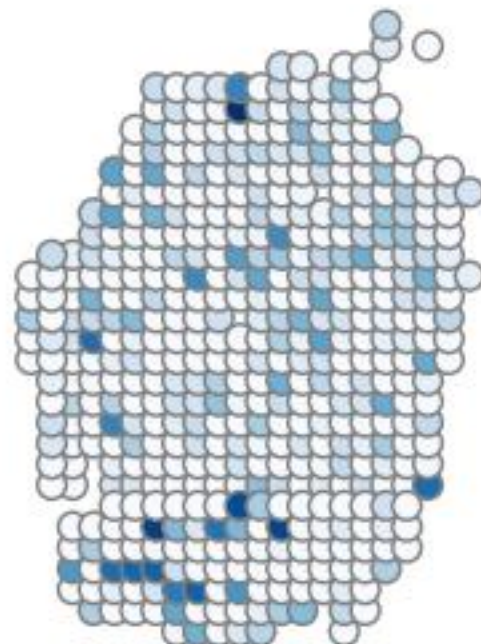

Endothelial CXCL12

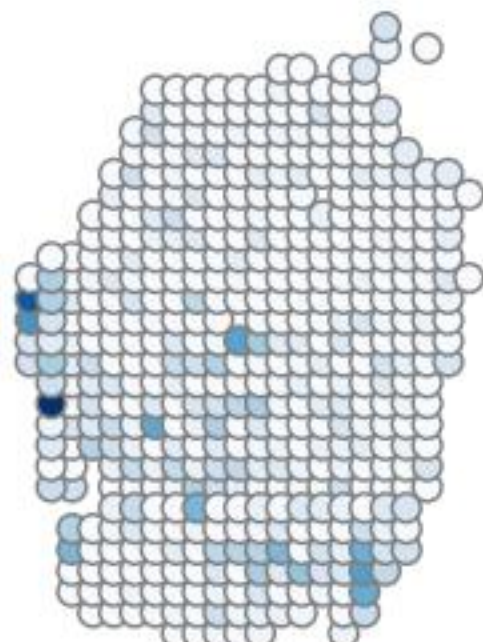

Endothelial ACKR1

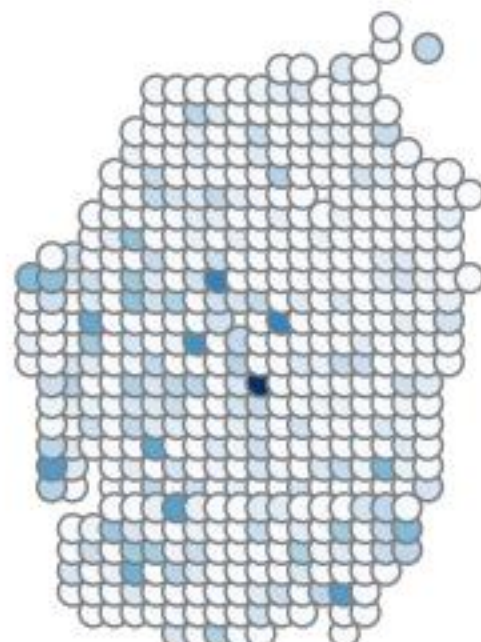

Cancer Epithelial

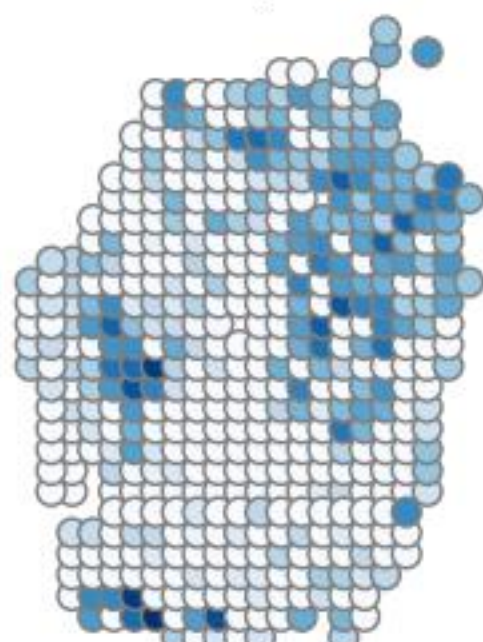

Normal Epithelial

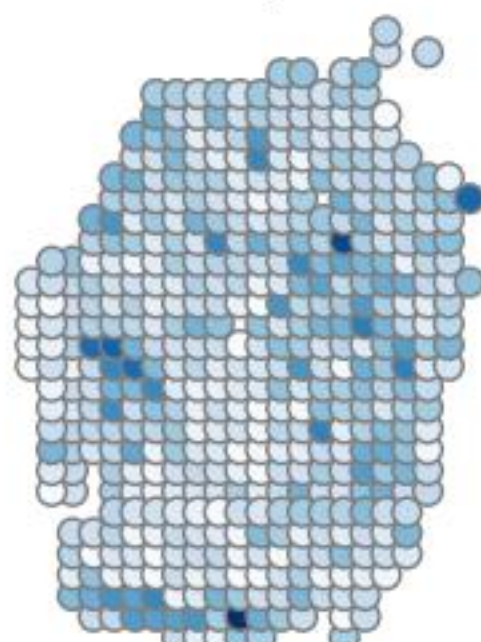

Cycling Myeloid

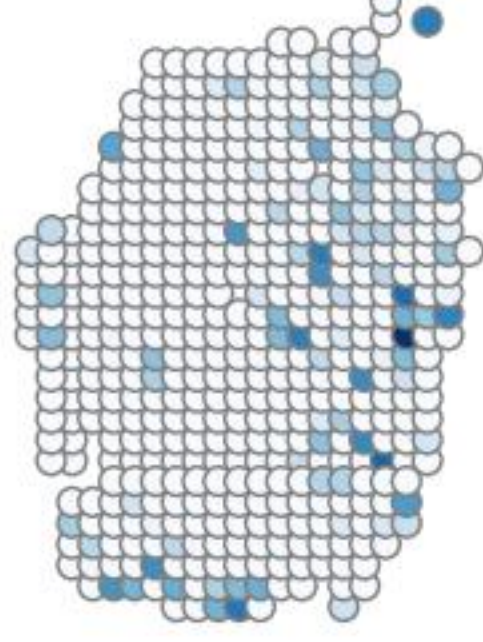

DCs

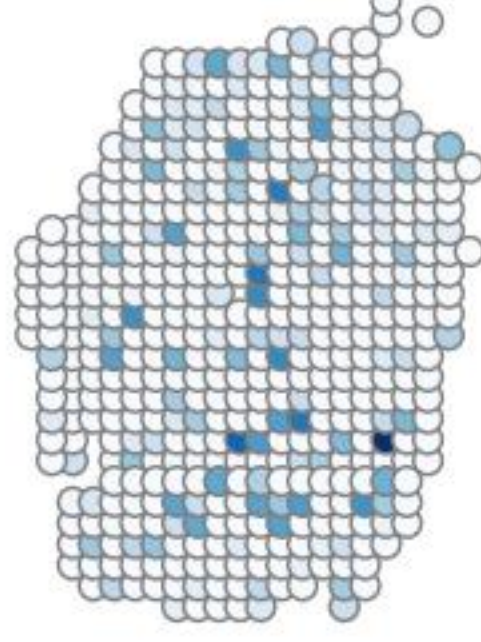

Macrophages

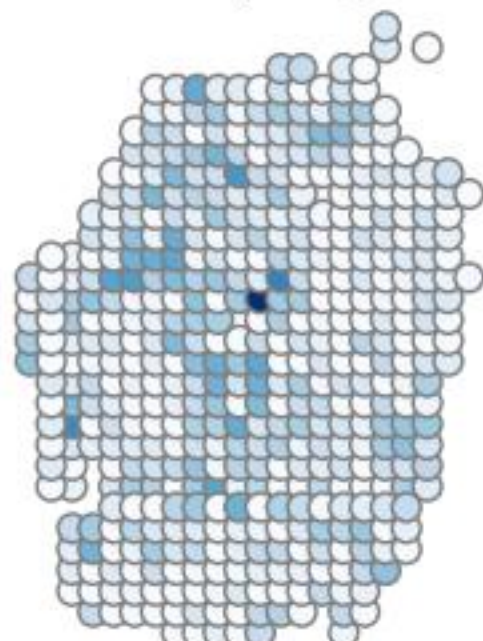

Monocytes

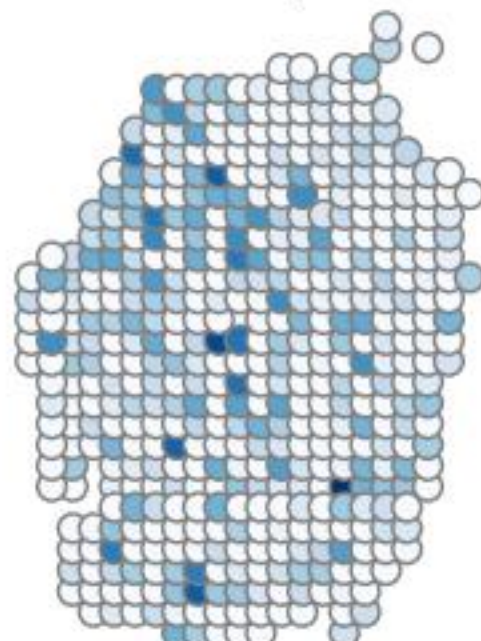

Plasma Cells

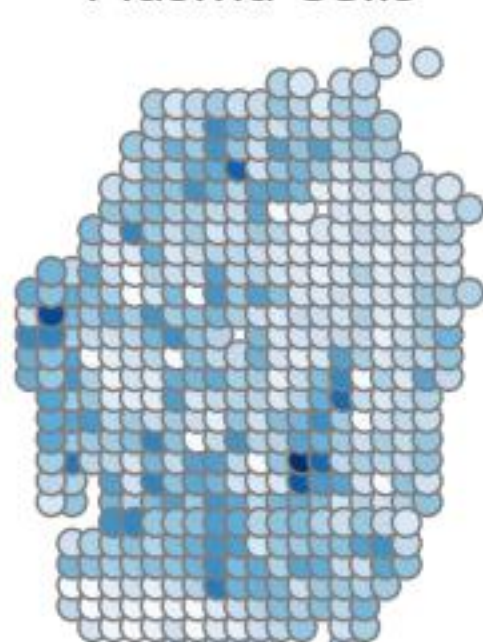

PVL Differentiated

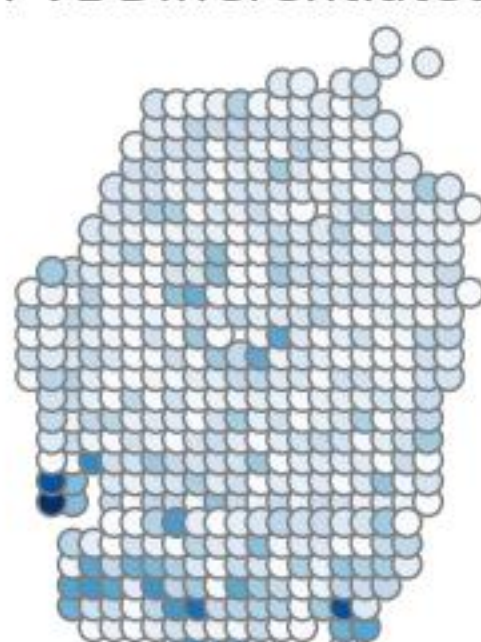

PVL Immature

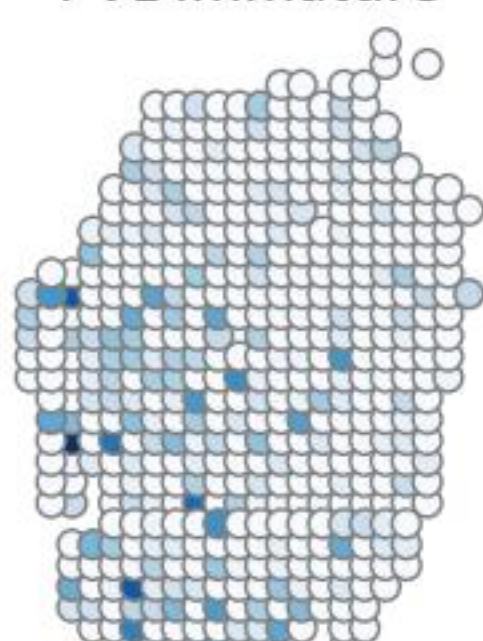

CD4+ T-cells

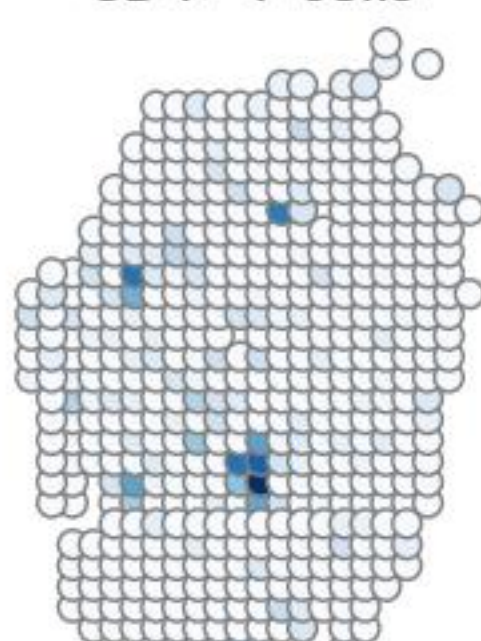

CD8+ T-cells

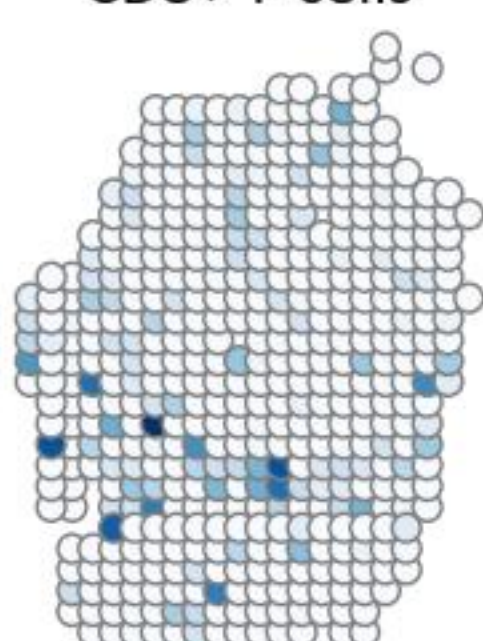

Cycling T-cells

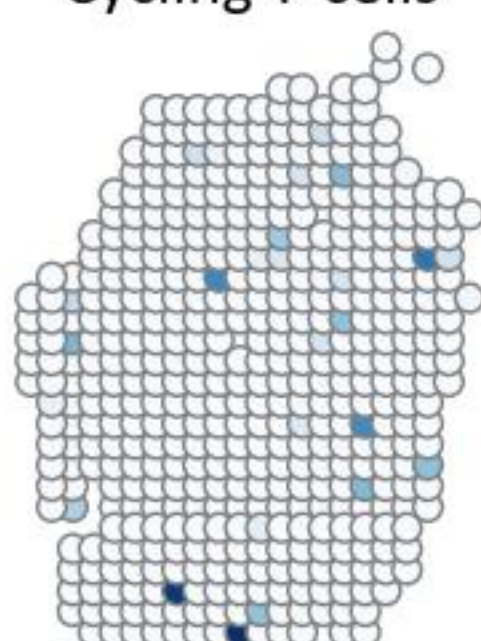

NK cells

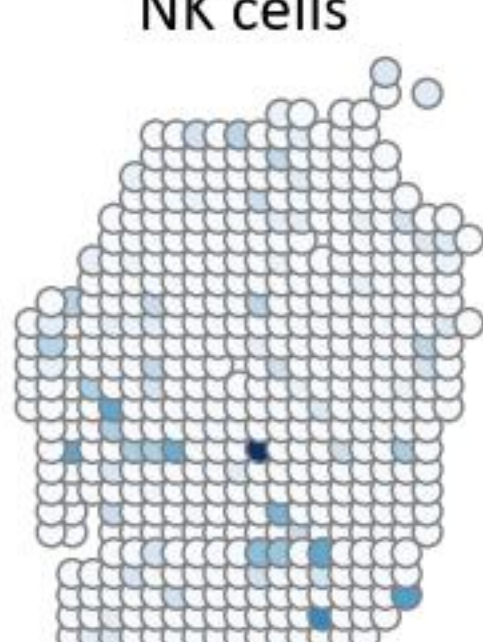

NKT cells

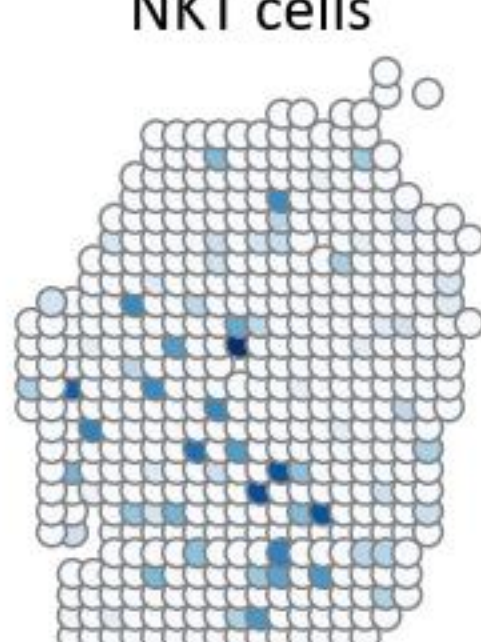

# minor\_B3

B-cells Memory

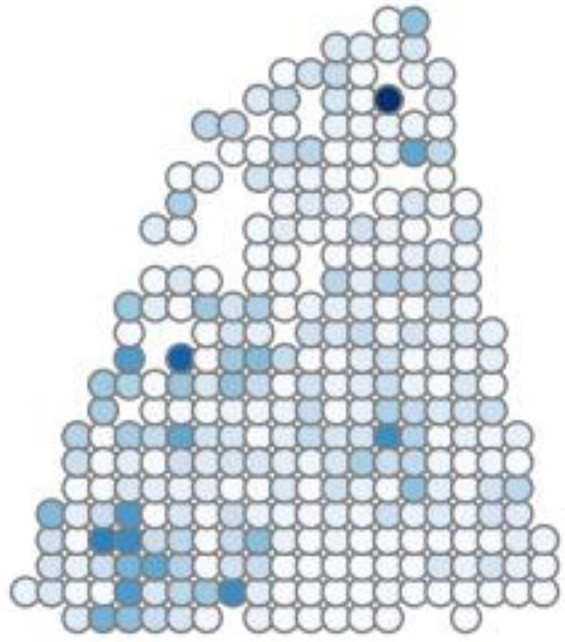

B-cells Naive

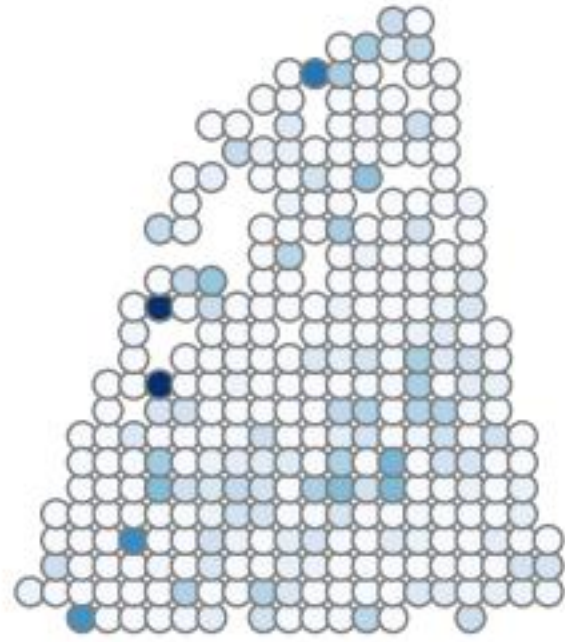

CAFs MSC/iCAF-like

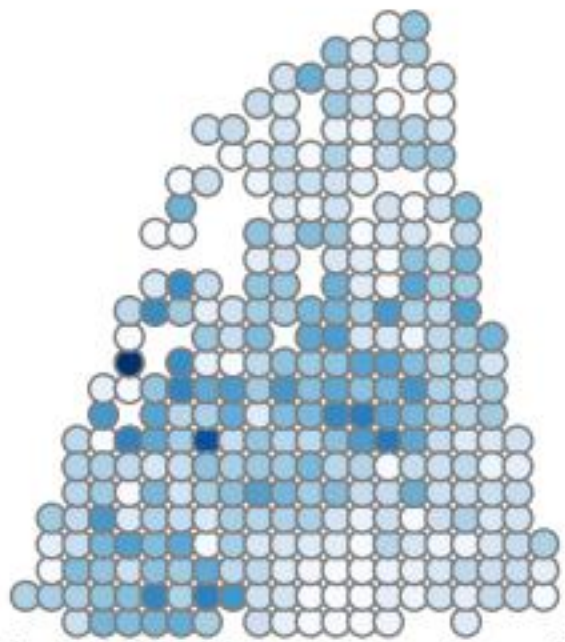

CAFs myCAF-like

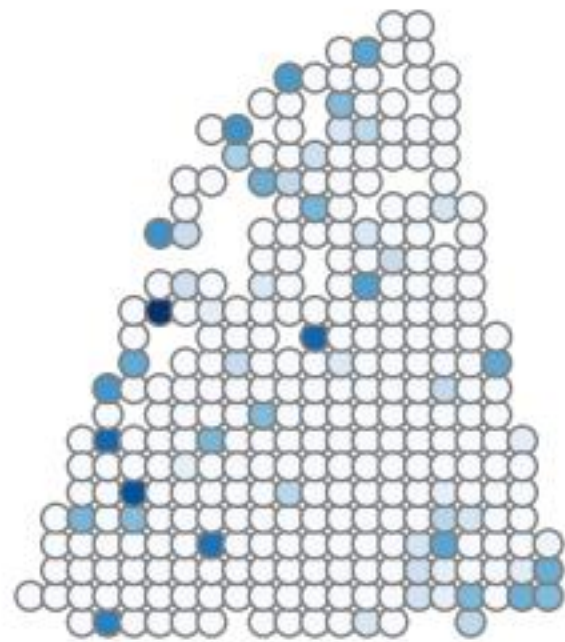

Endothelial Lymphatic  
LYVE1

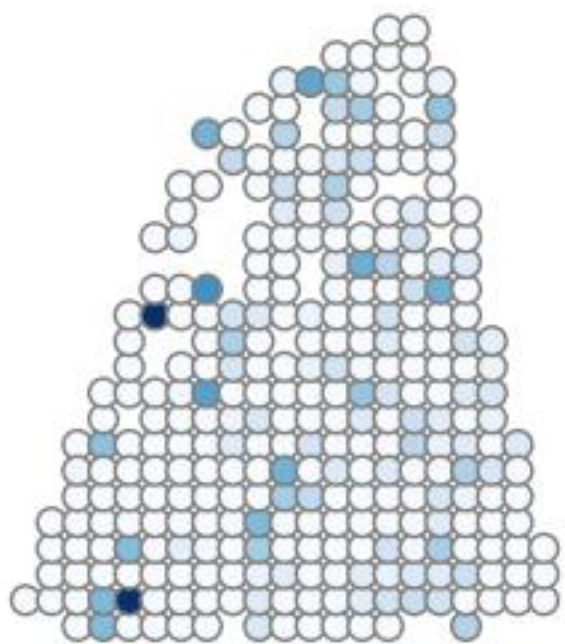

Endothelial RGS5

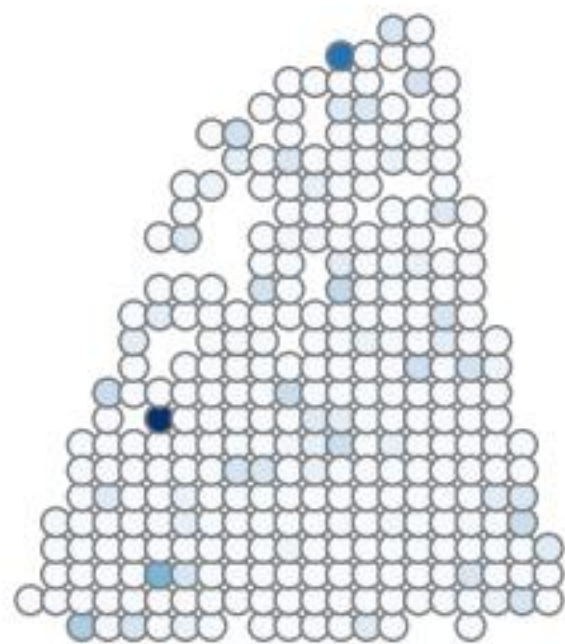

Endothelial CXCL12

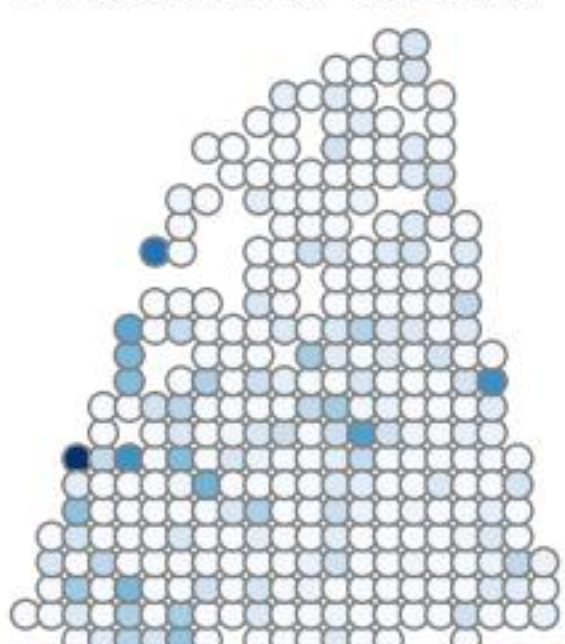

Endothelial ACKR1

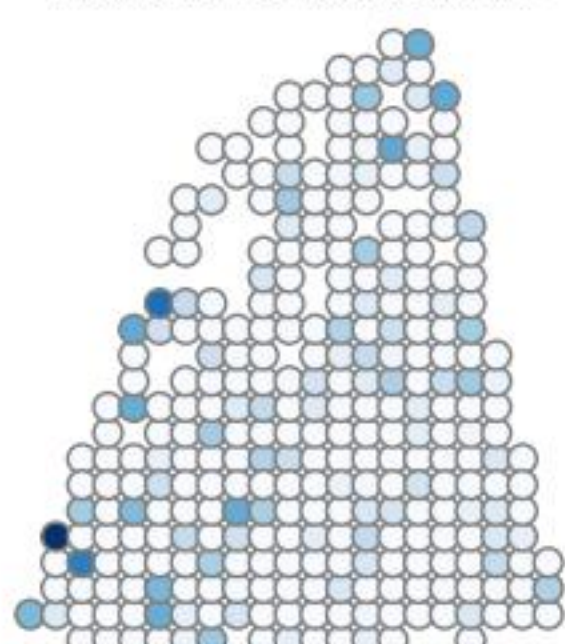

Cancer Epithelial

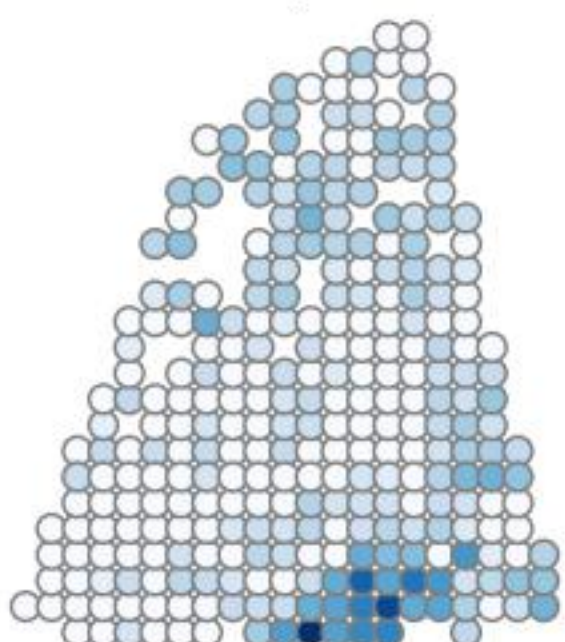

Normal Epithelial

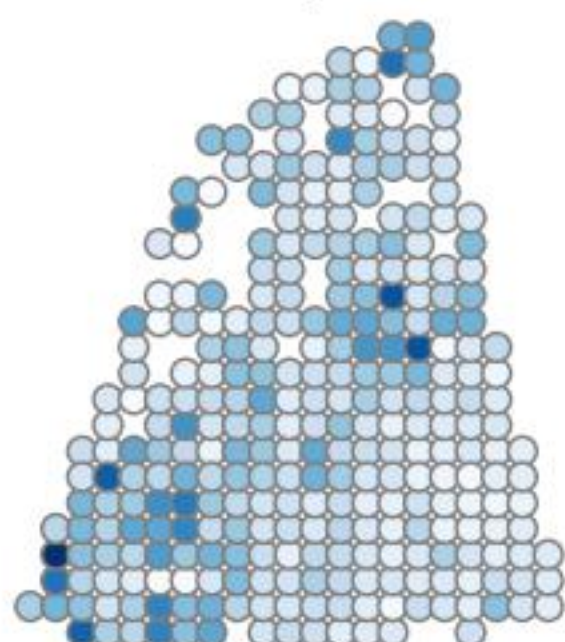

Cycling Myeloid

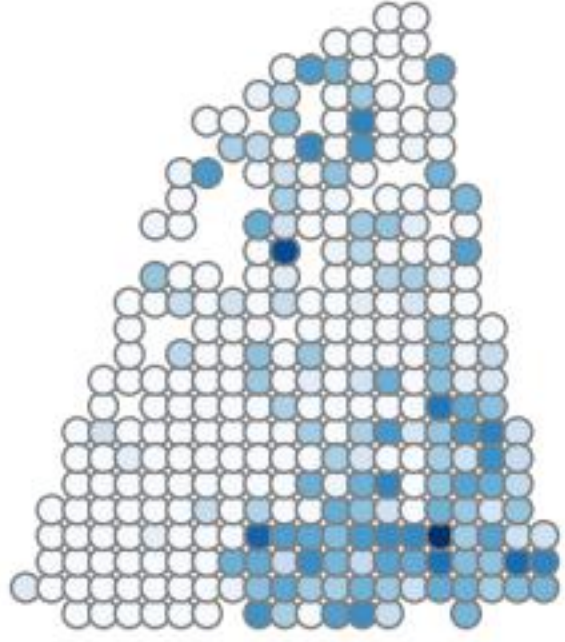

DCs

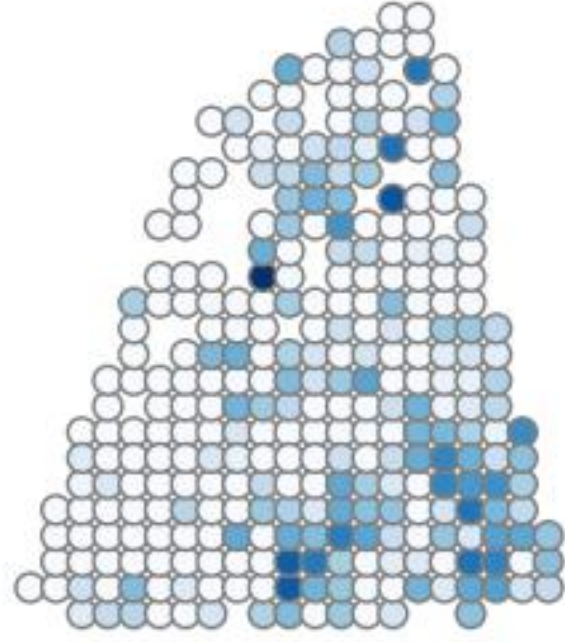

Macrophages

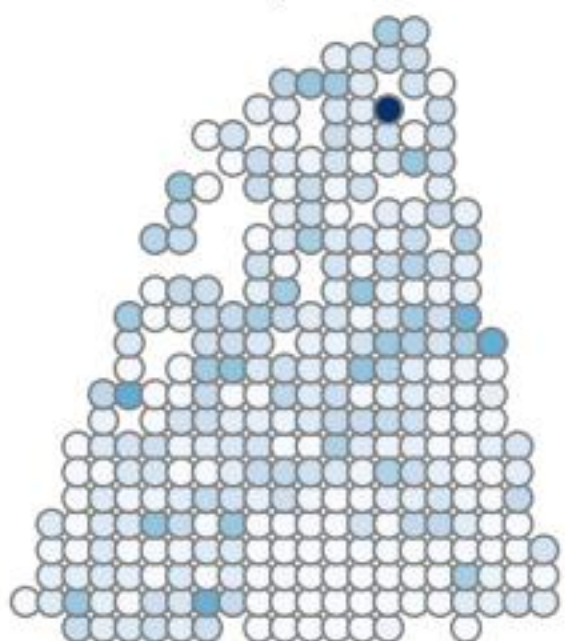

Monocytes

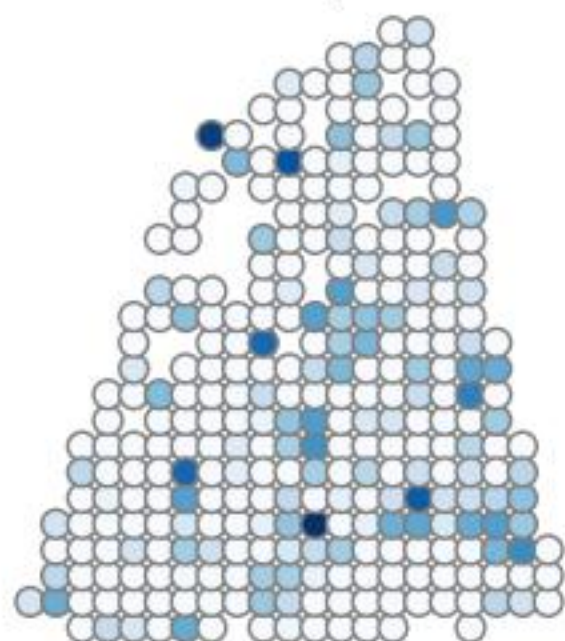

Plasma Cells

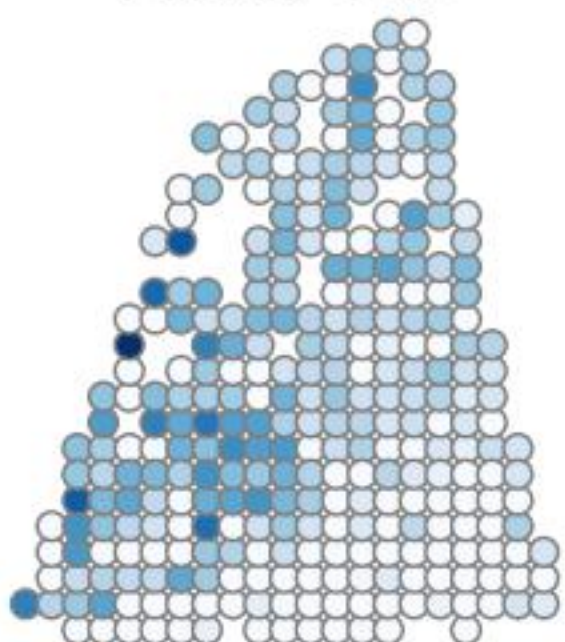

PVL Differentiated

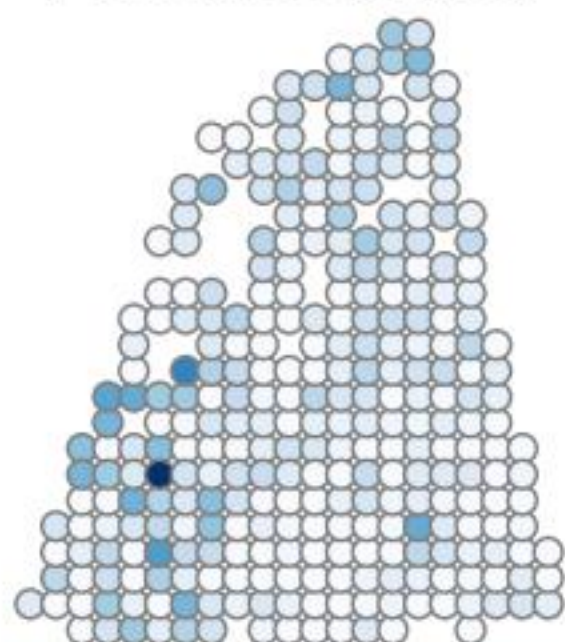

PVL Immature

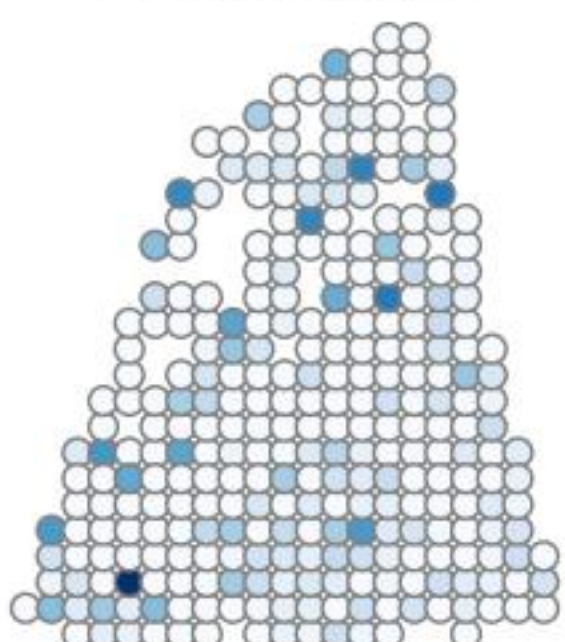

CD4+ T-cells

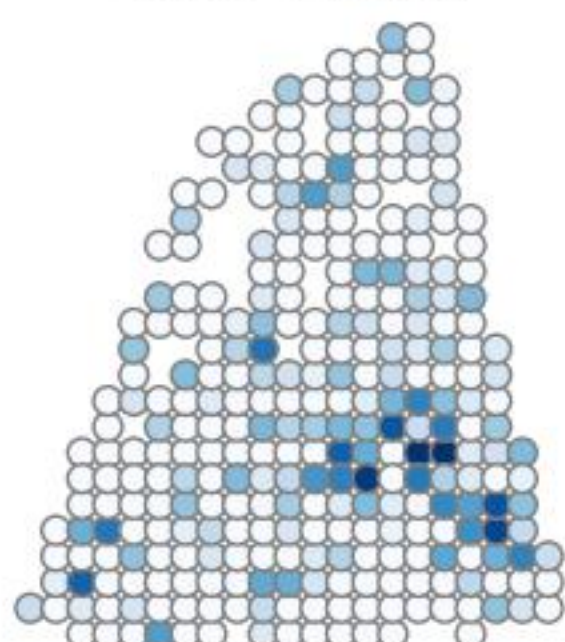

CD8+ T-cells

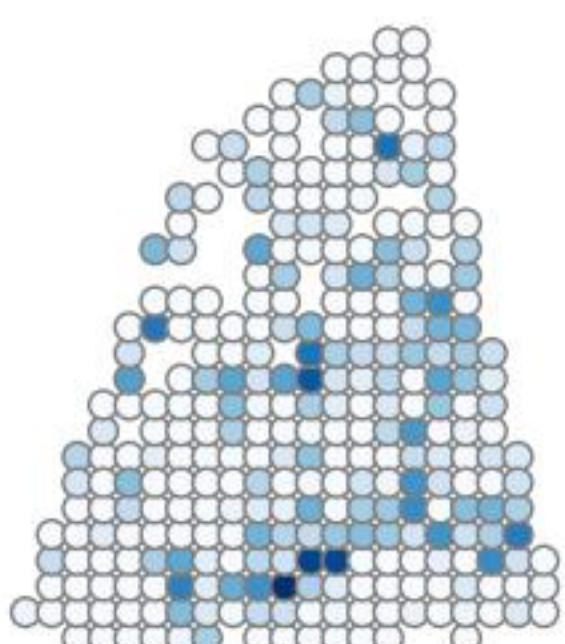

Cycling T-cells

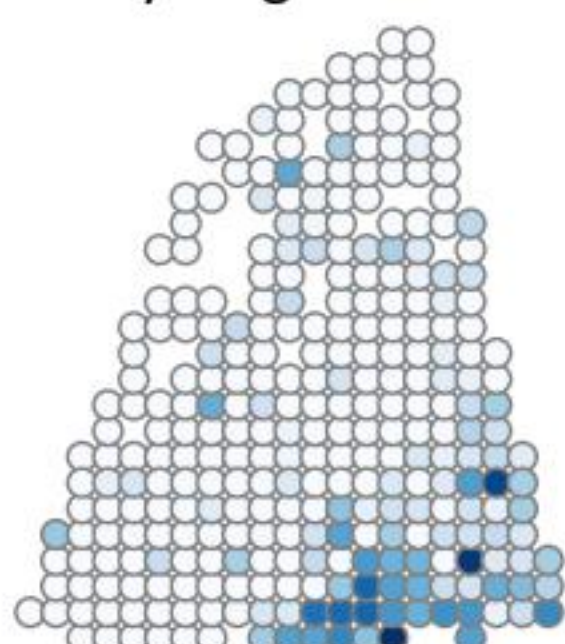

NK cells

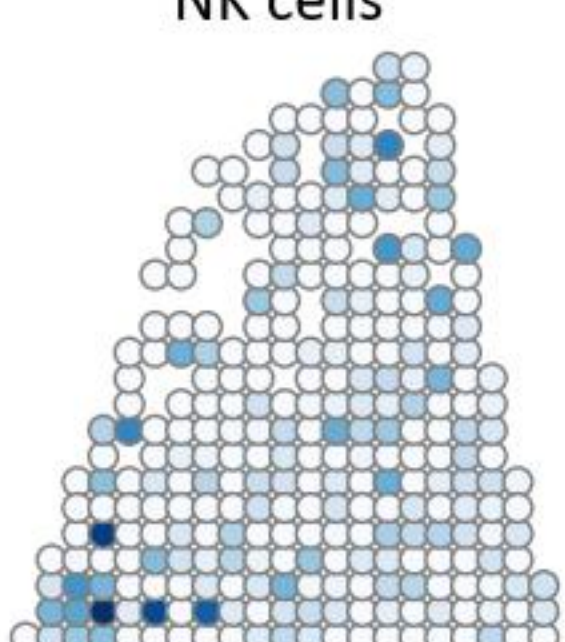

NKT cells

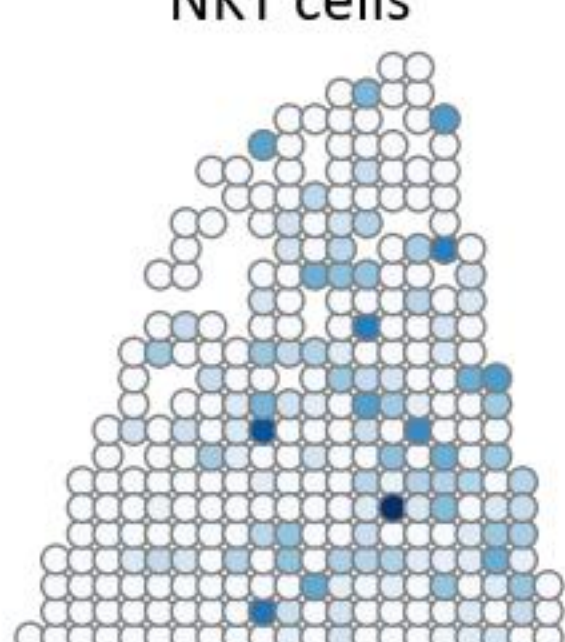

# minor\_B6

B-cells Memory

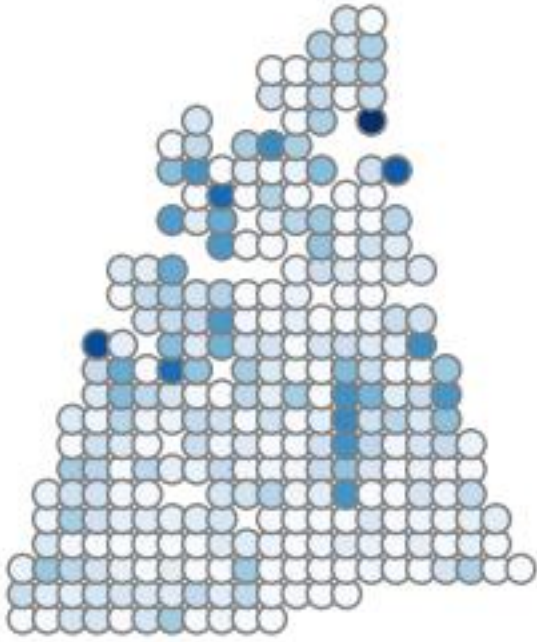

B-cells Naive

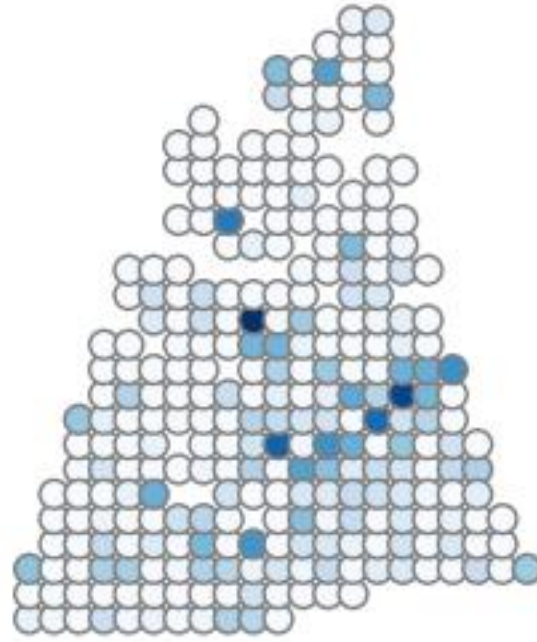

CAFs MSC/iCAF-like

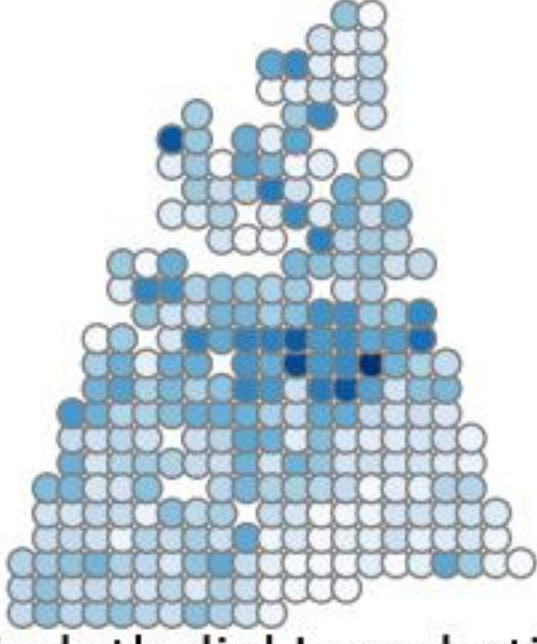

CAFs myCAF-like

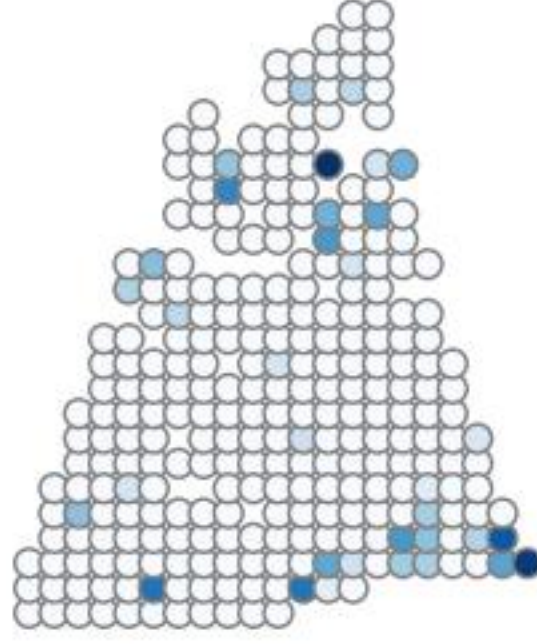

Endothelial Lymphatic  
LYVE1

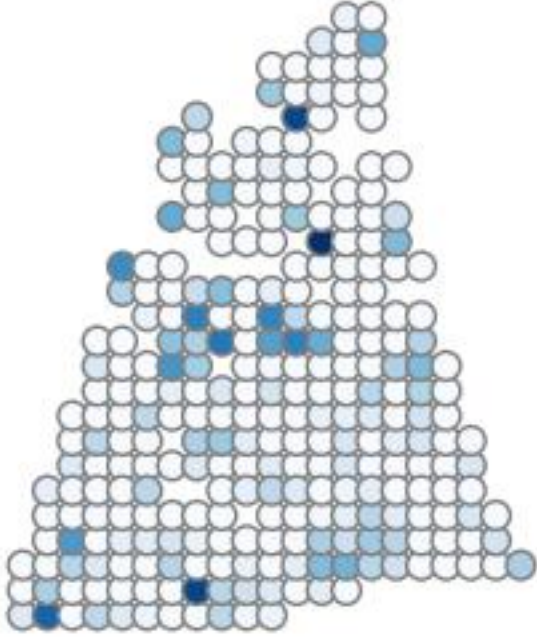

Endothelial RGS5

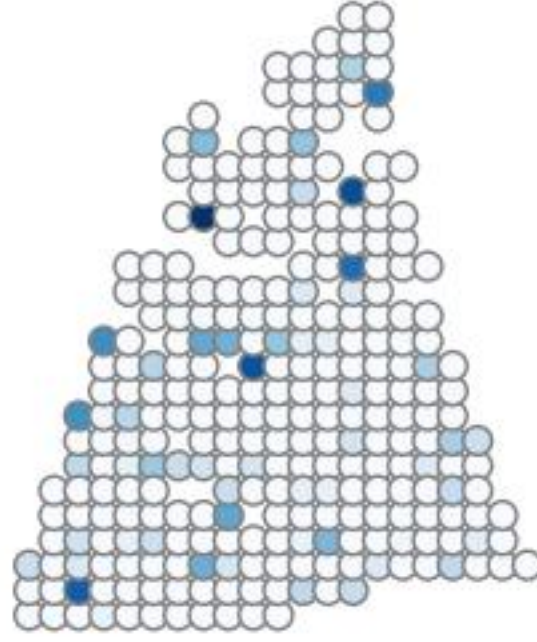

Endothelial CXCL12

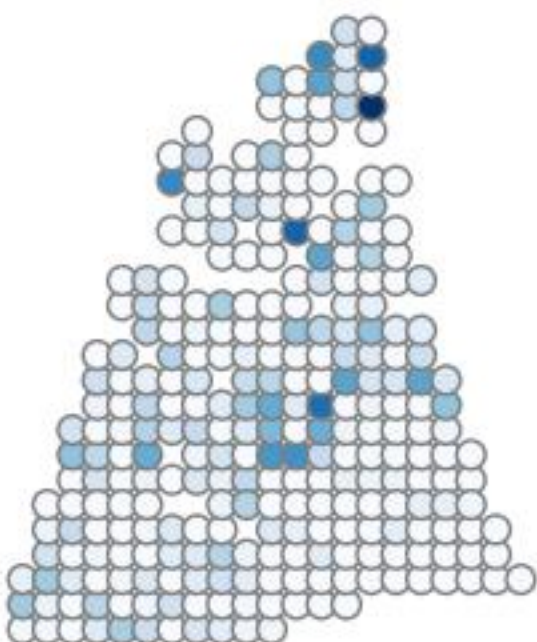

Endothelial ACKR1

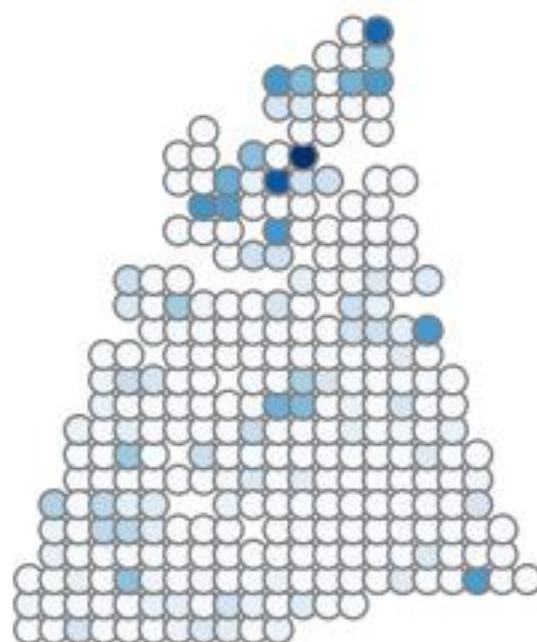

Cancer Epithelial

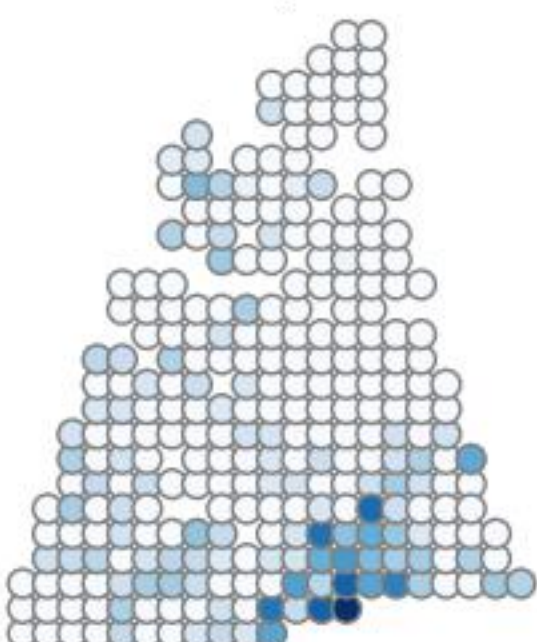

Normal Epithelial

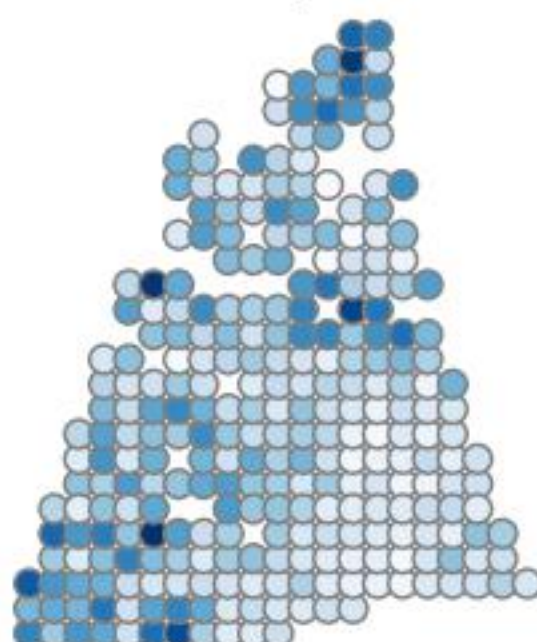

Cycling Myeloid

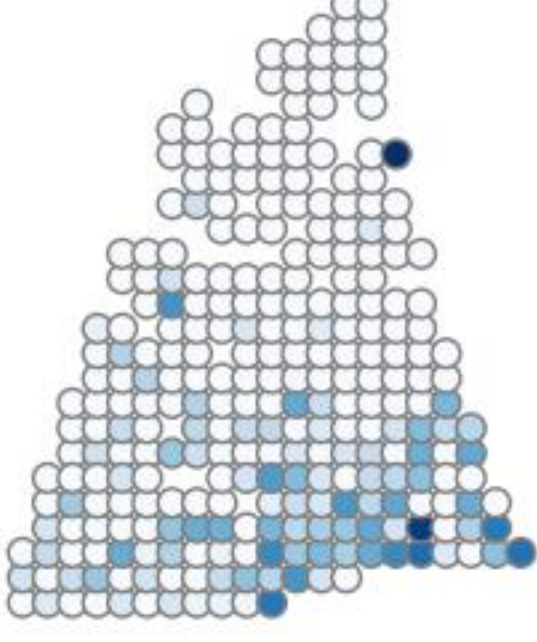

DCs

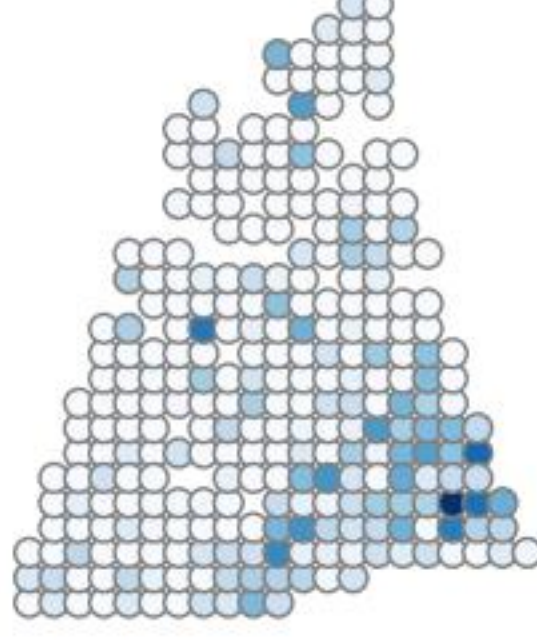

Macrophages

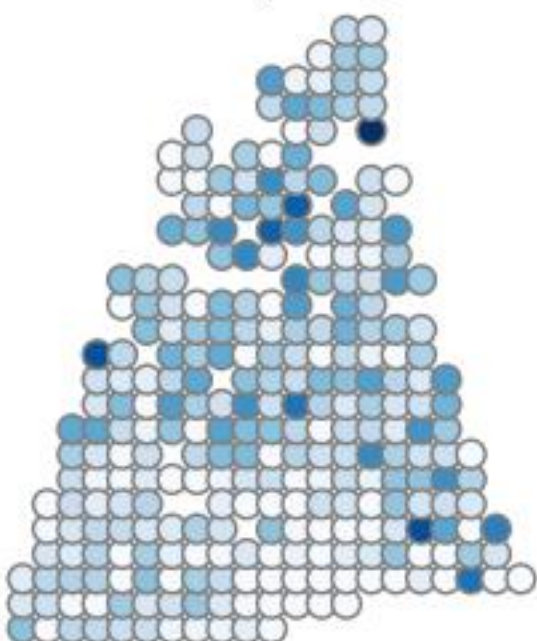

Monocytes

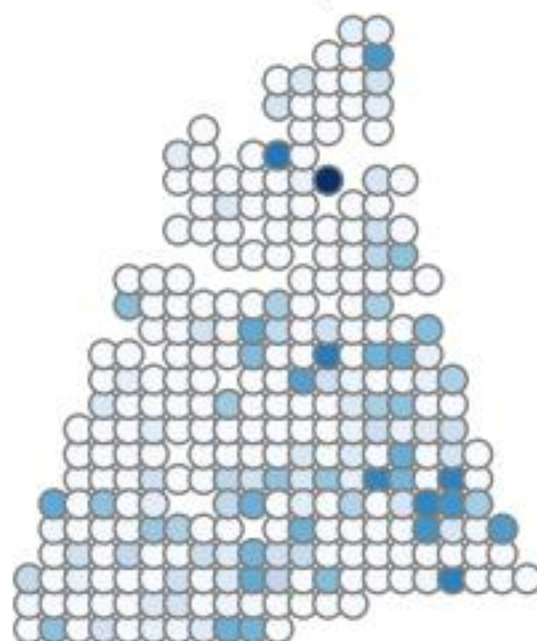

Plasma Cells

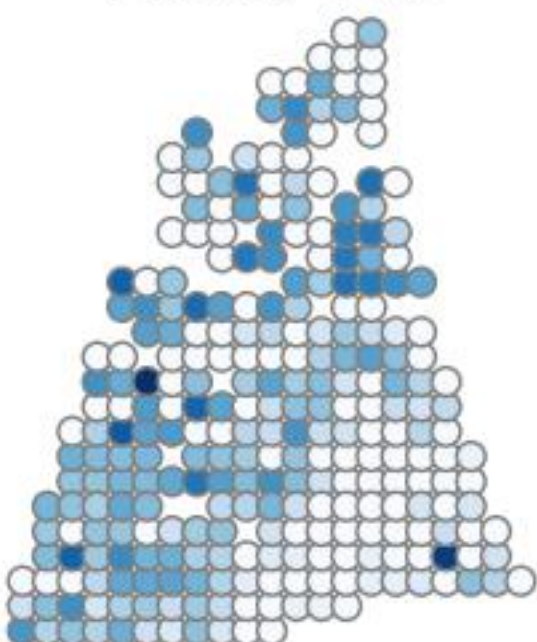

PVL Differentiated

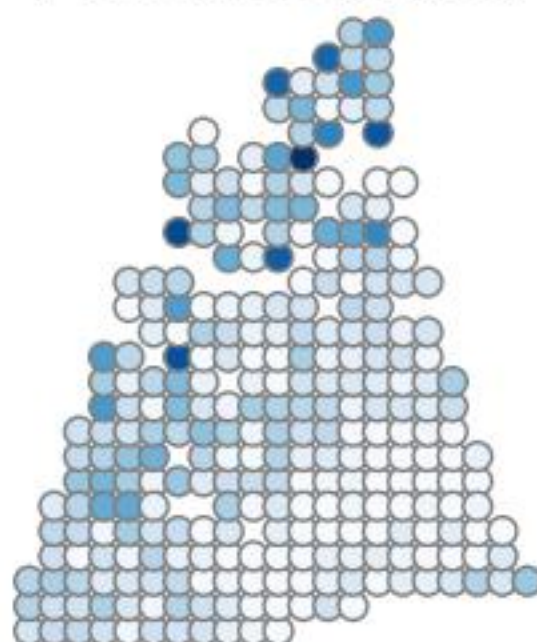

PVL Immature

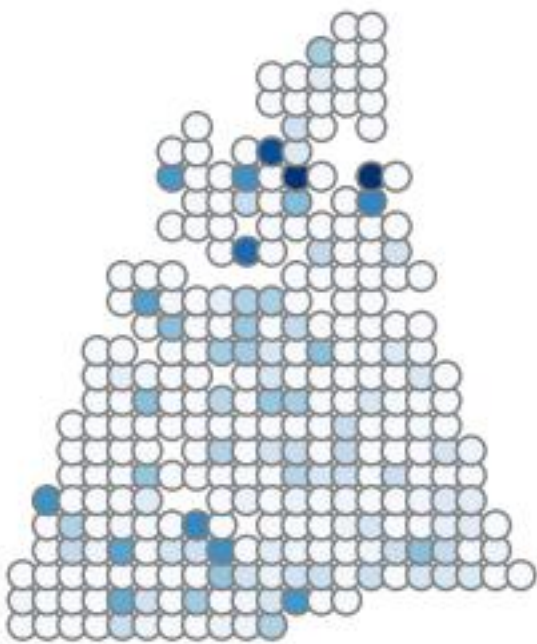

CD4+ T-cells

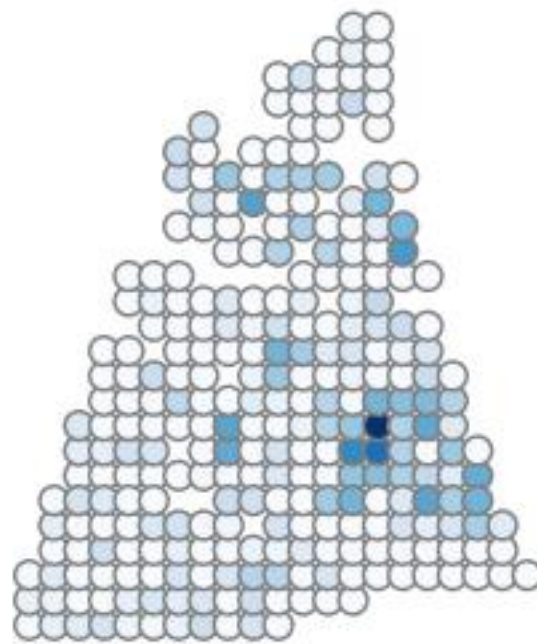

CD8+ T-cells

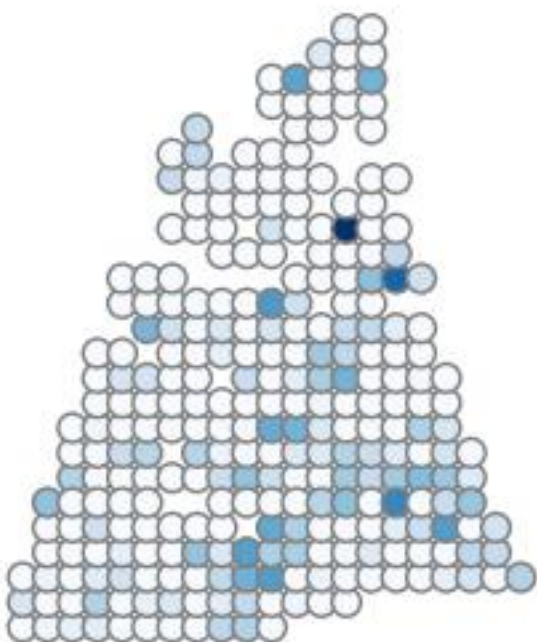

Cycling T-cells

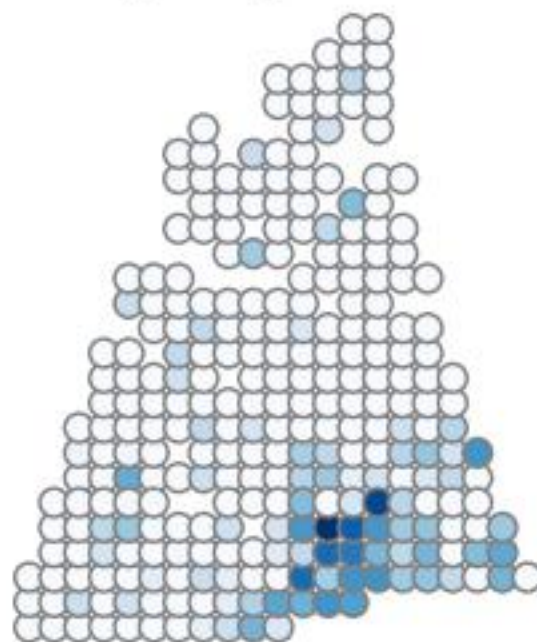

NK cells

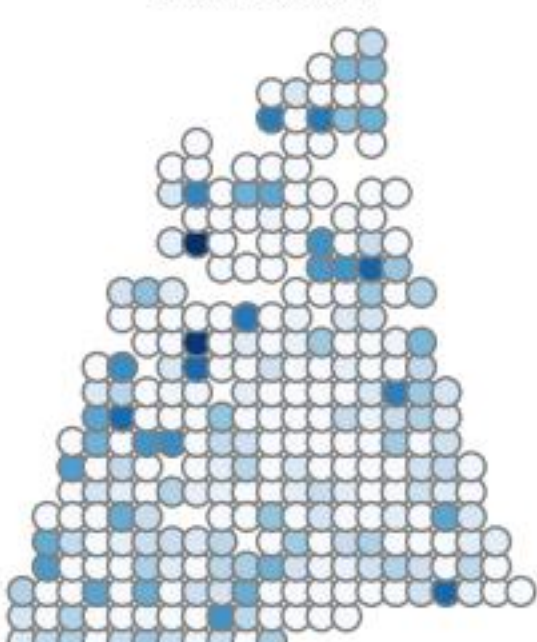

NKT cells

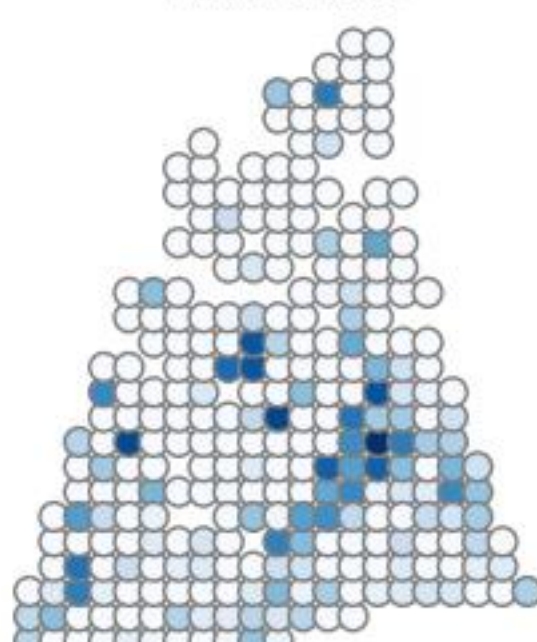

# minor\_C3

B-cells Memory

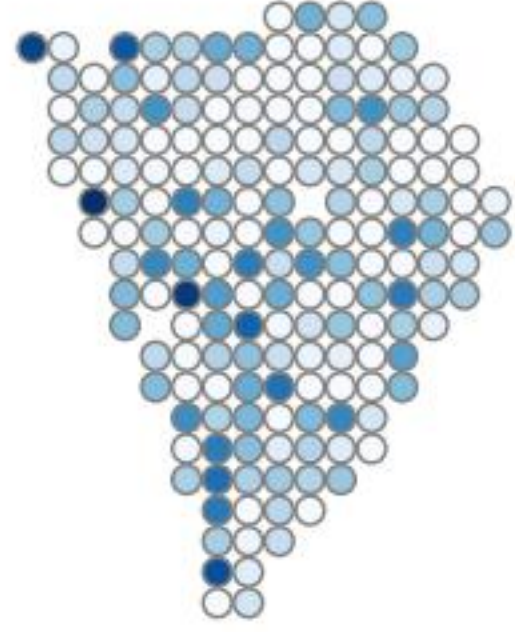

B-cells Naive

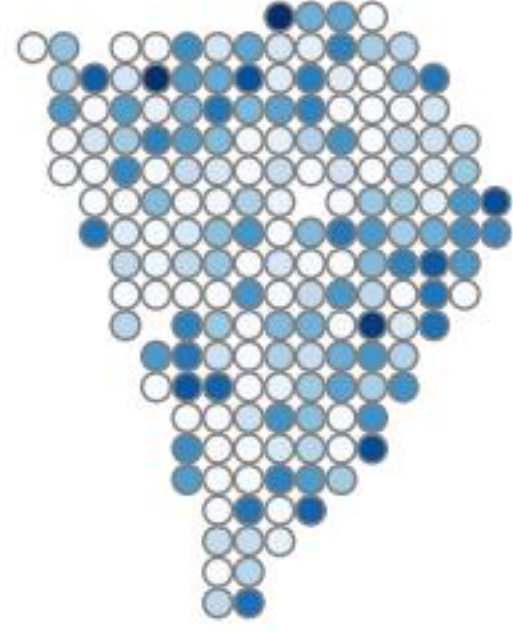

CAFs MSC/iCAF-like

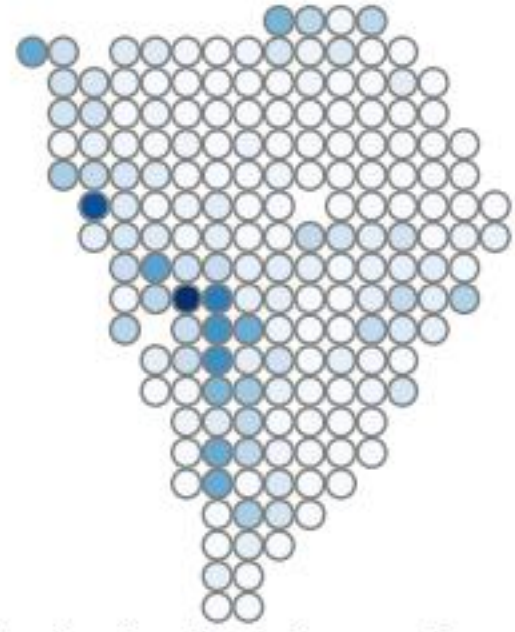

CAFs myCAF-like

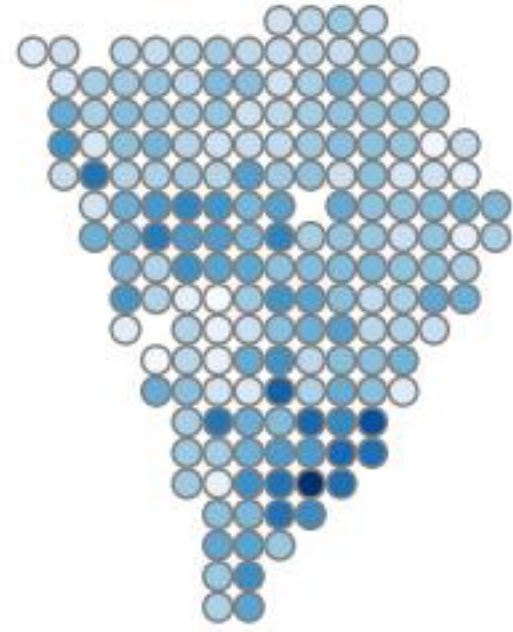

Endothelial Lymphatic  
LYVE1

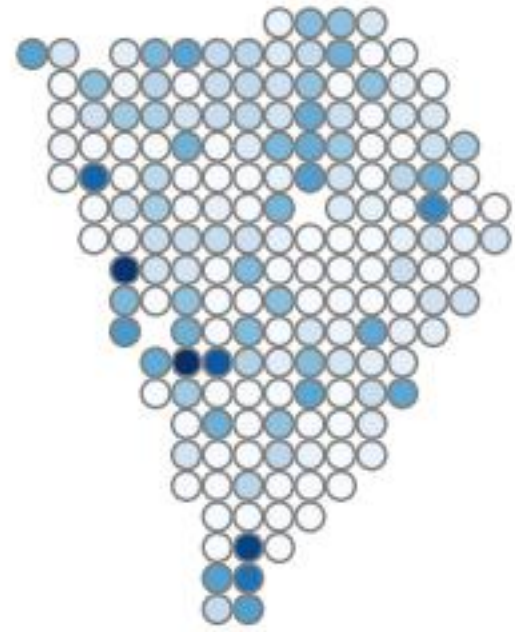

Endothelial RGS5

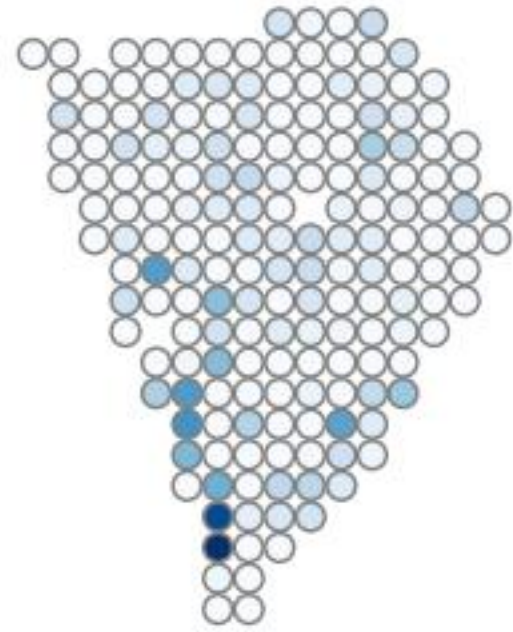

Endothelial CXCL12

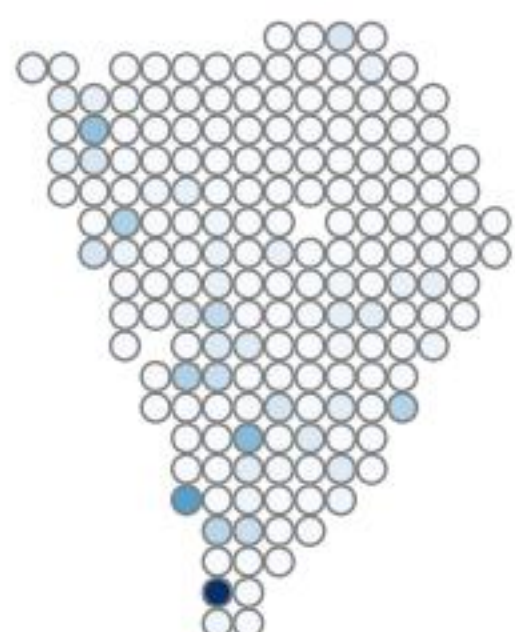

Endothelial ACKR1

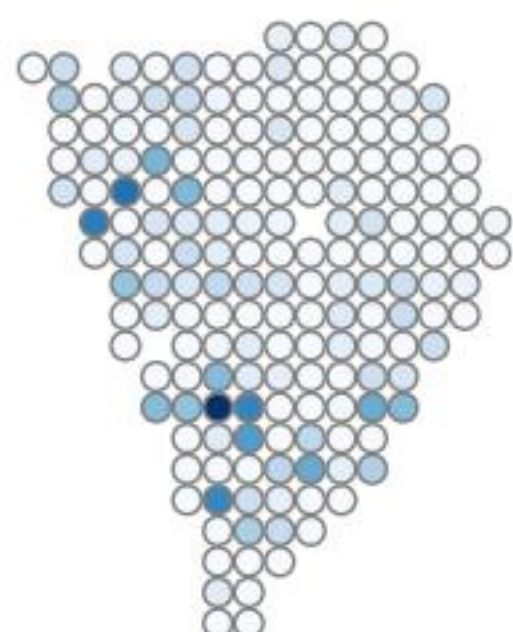

Cancer Epithelial

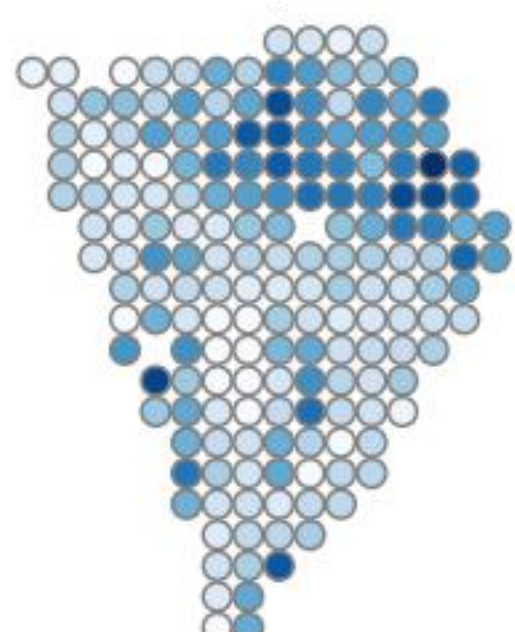

Normal Epithelial

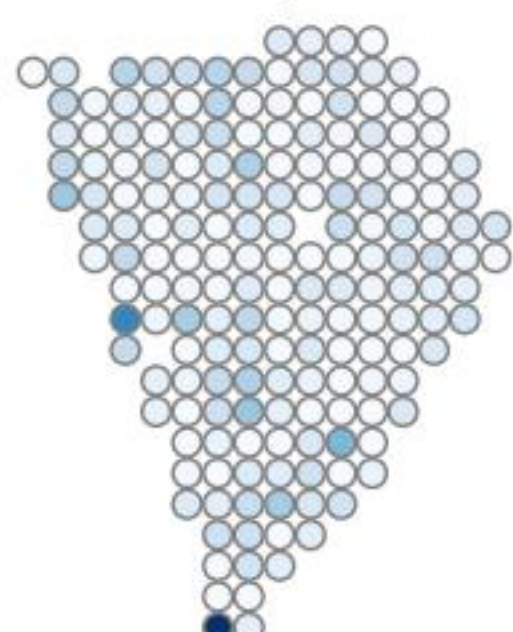

Cycling Myeloid

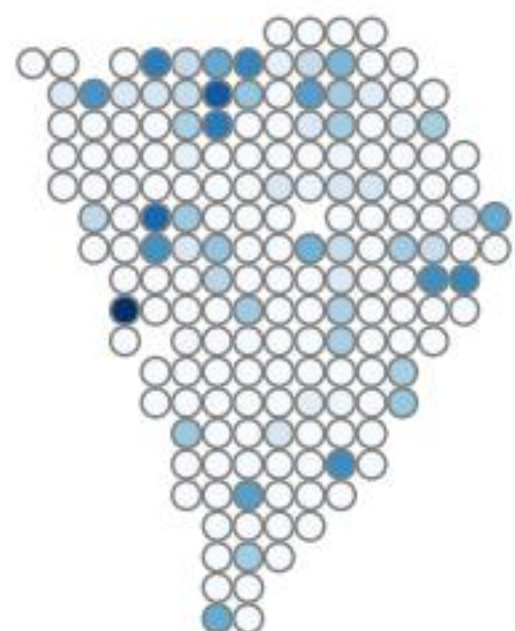

DCs

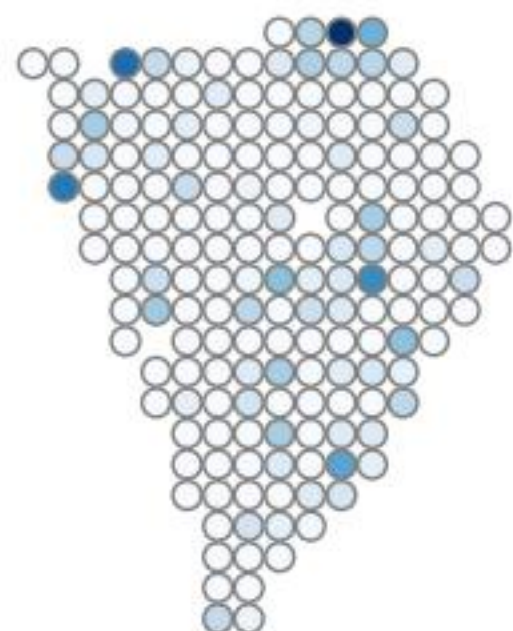

Macrophages

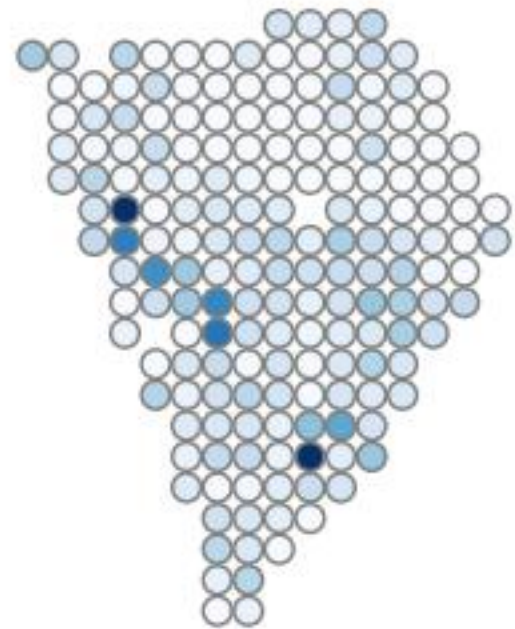

Monocytes

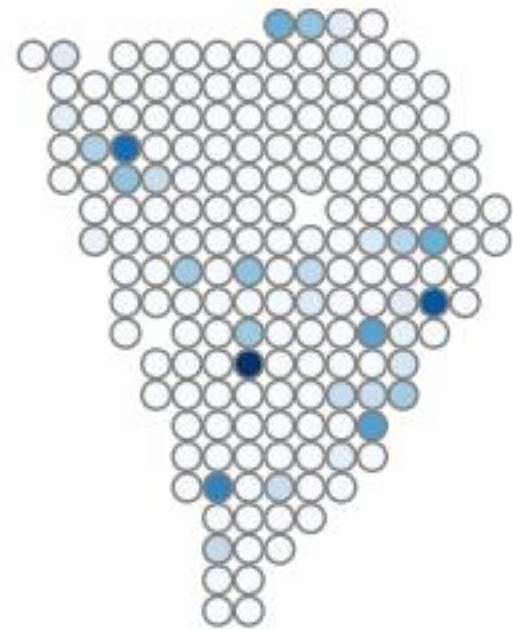

Plasma Cells

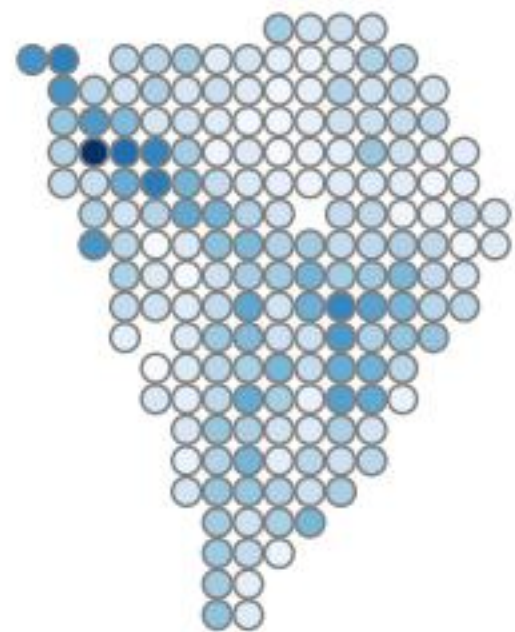

PVL Differentiated

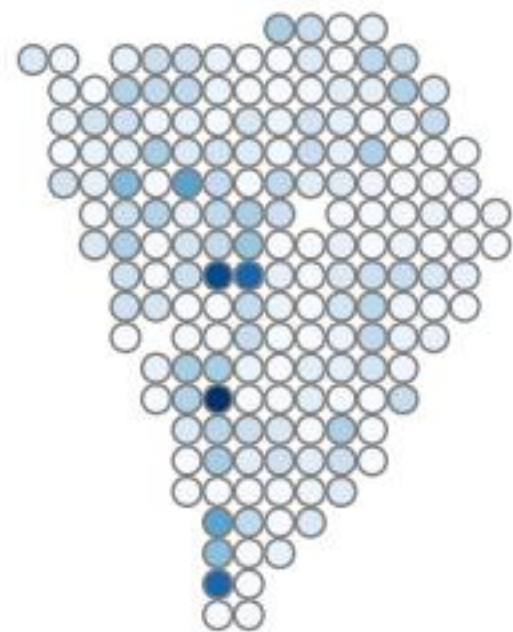

PVL Immature

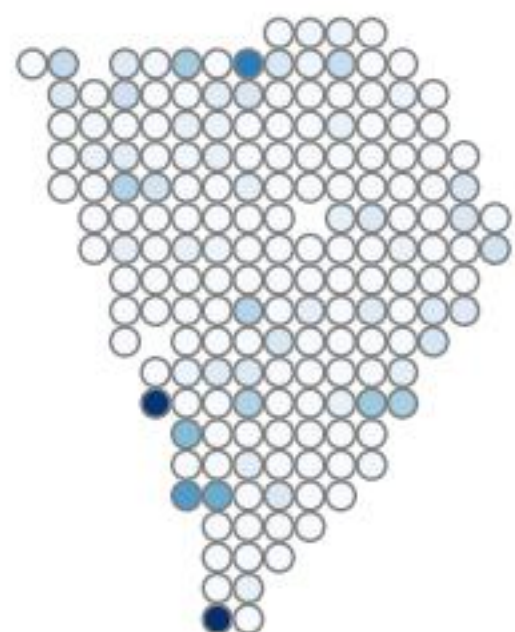

CD4+ T-cells

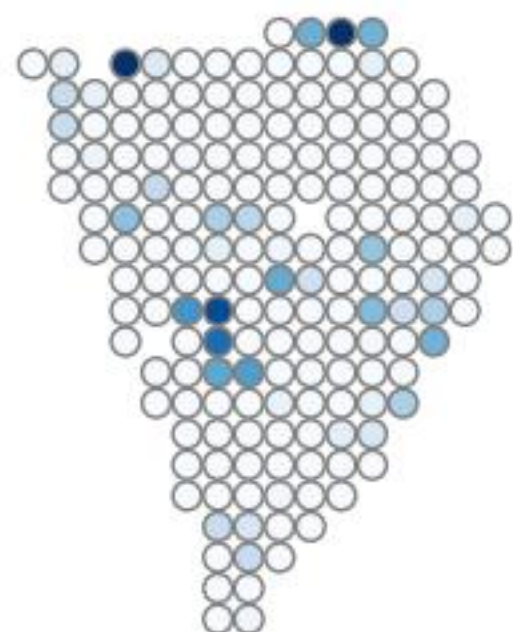

CD8+ T-cells

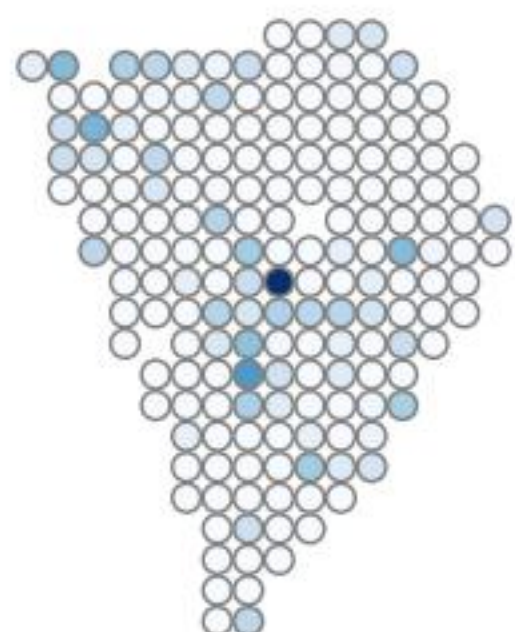

Cycling T-cells

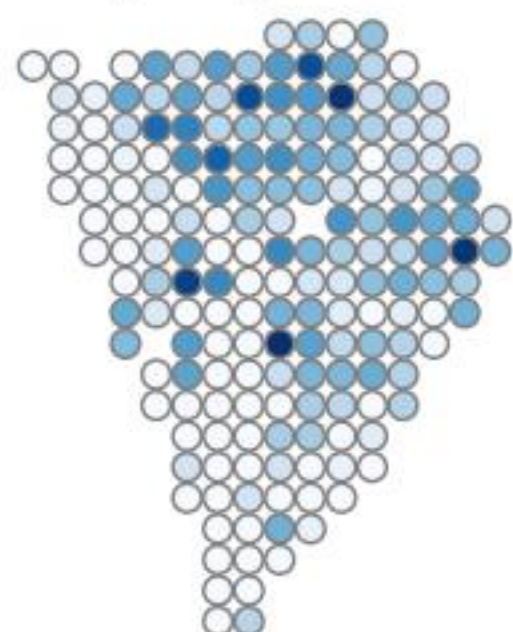

NK cells

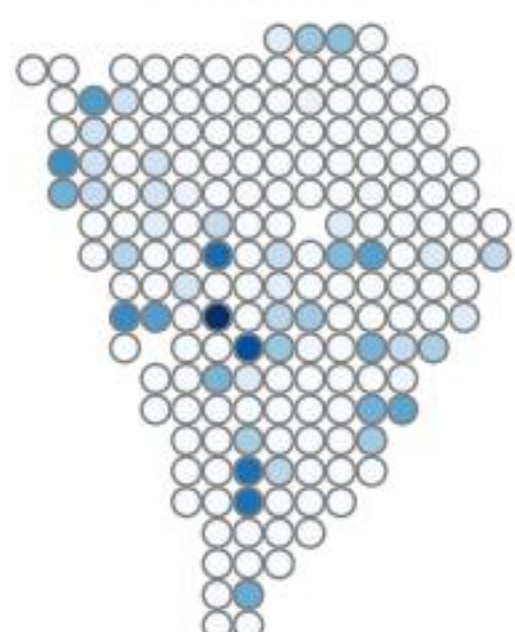

NKT cells

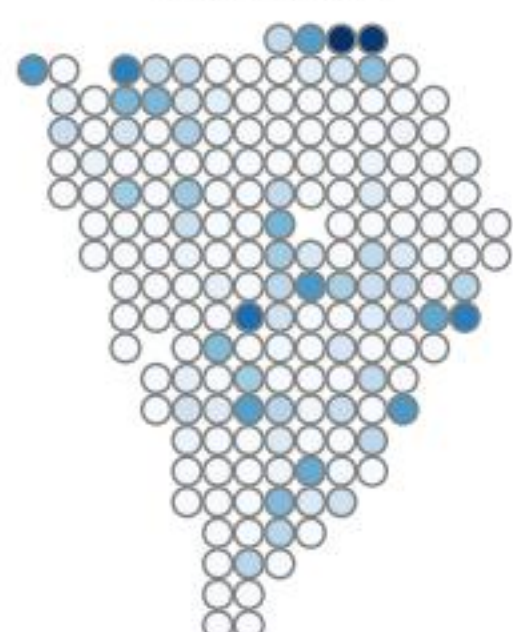



# subset\_E2

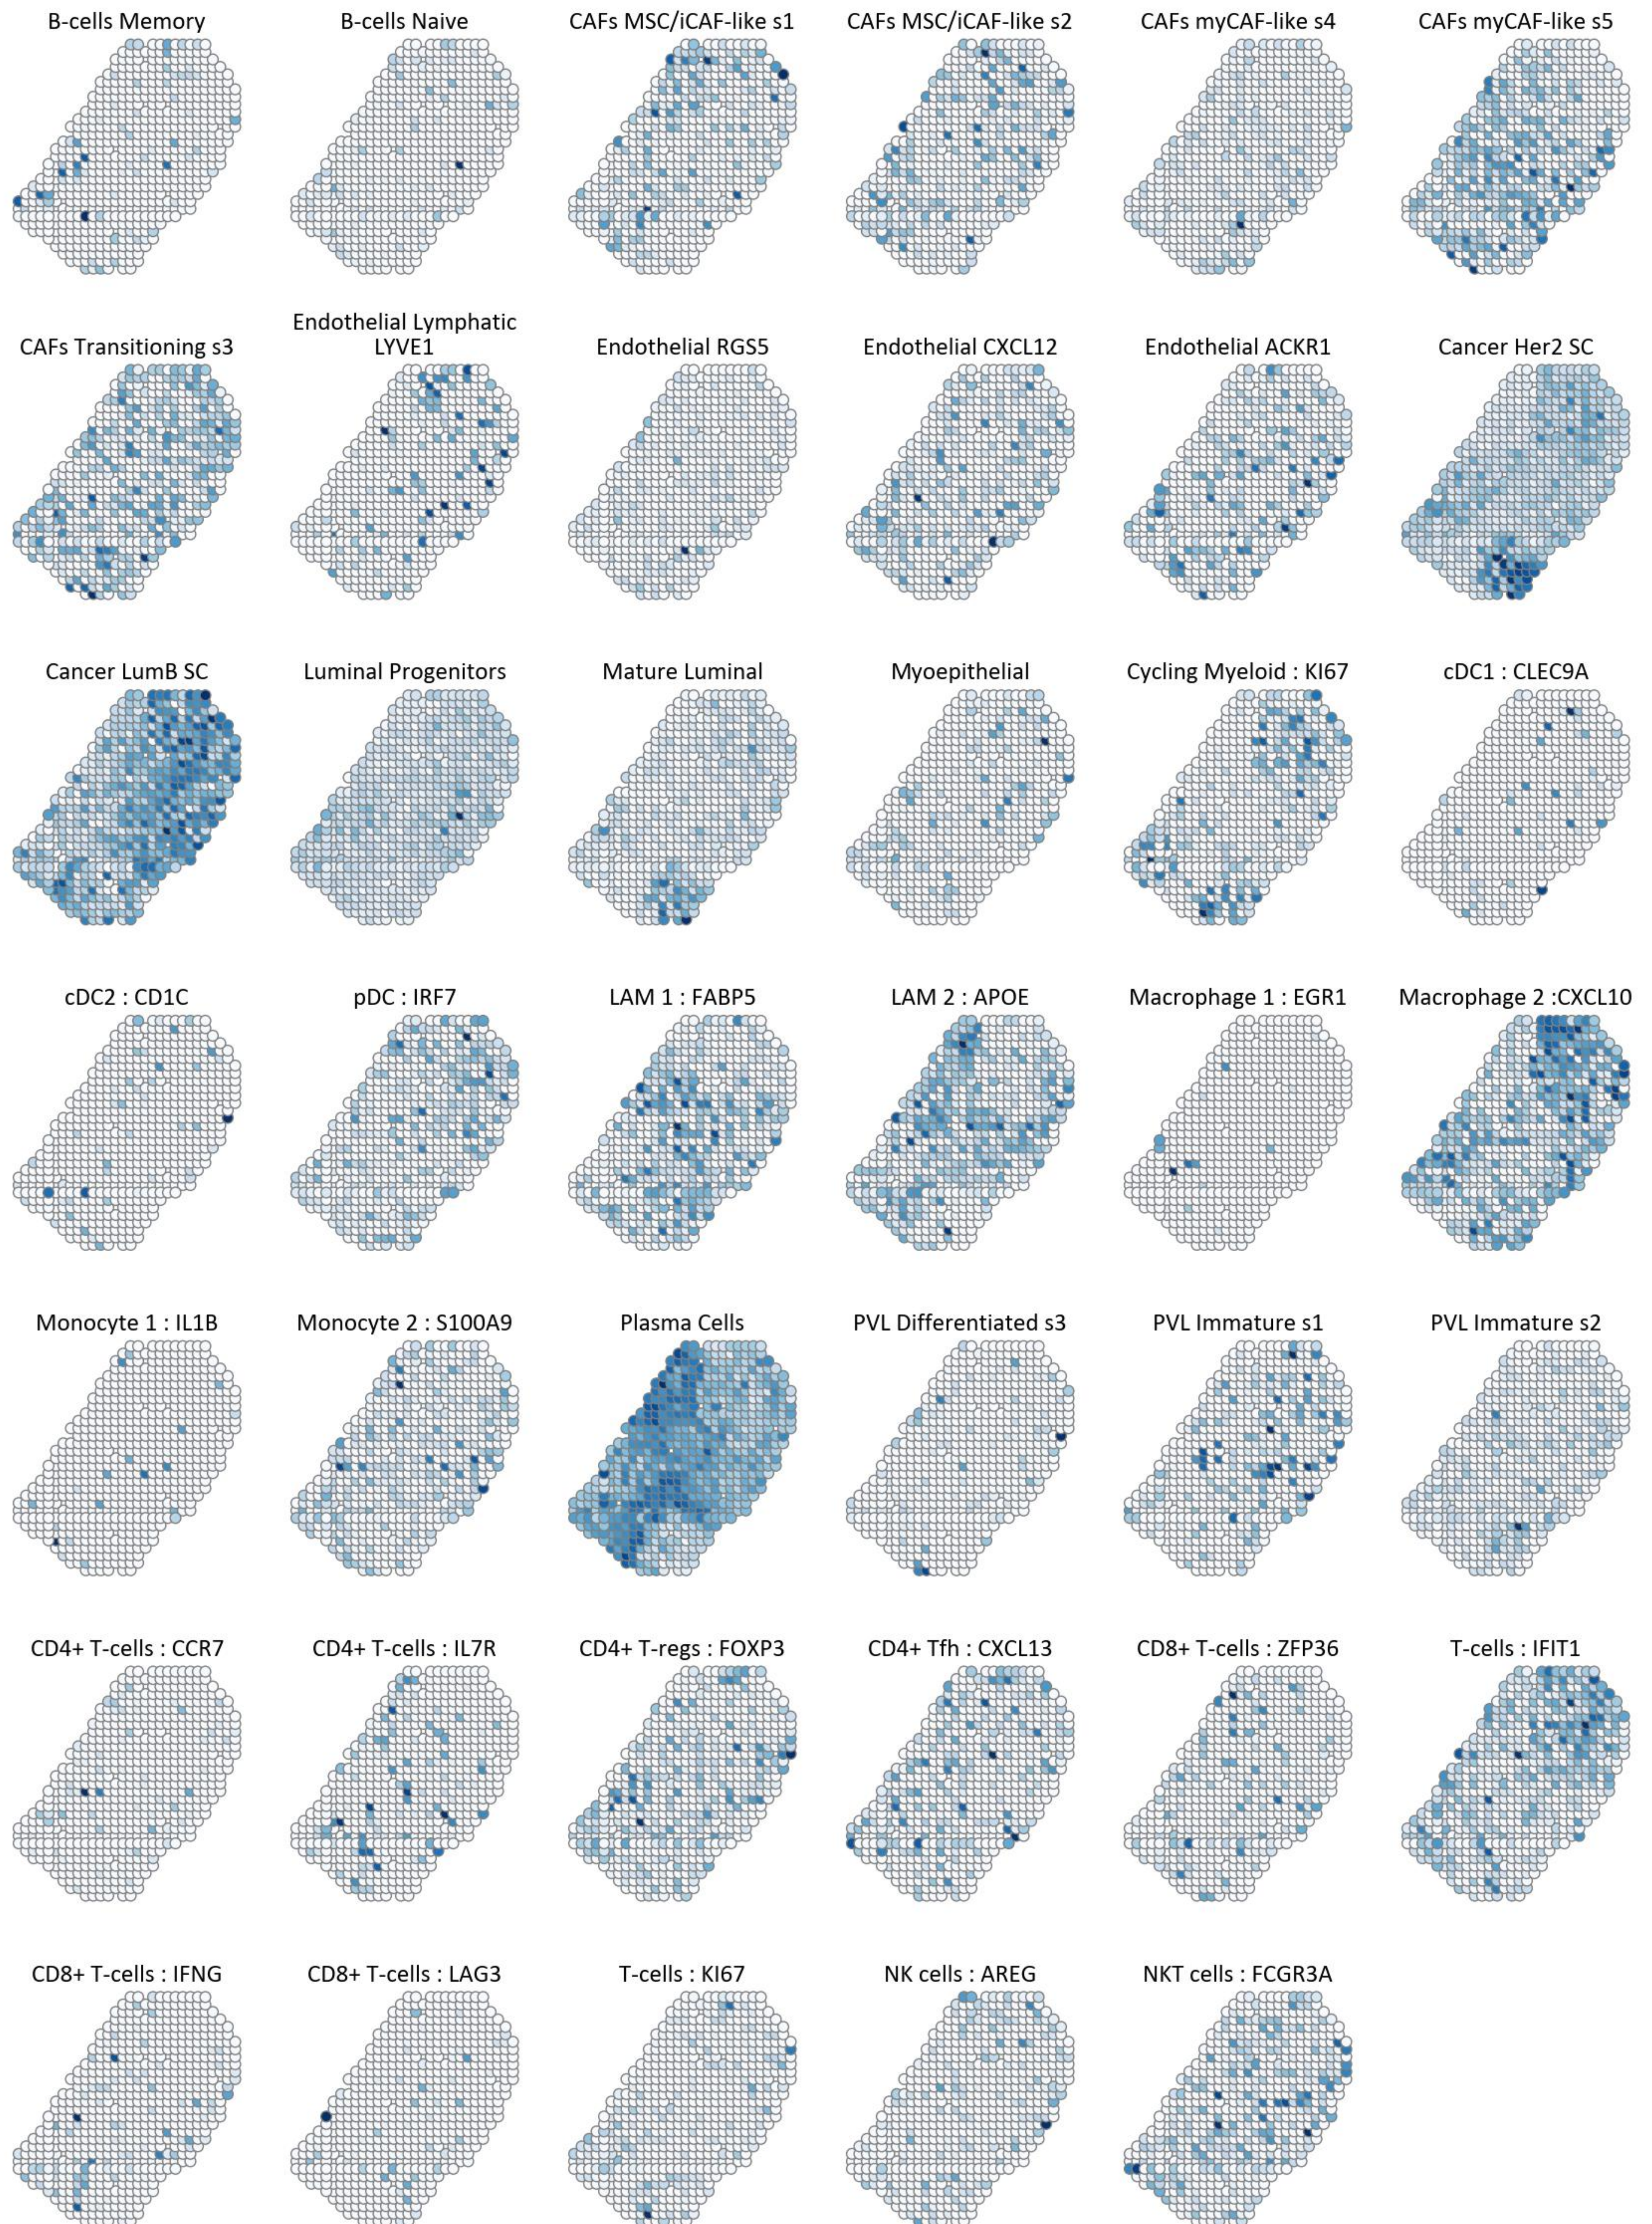

# subset\_G2

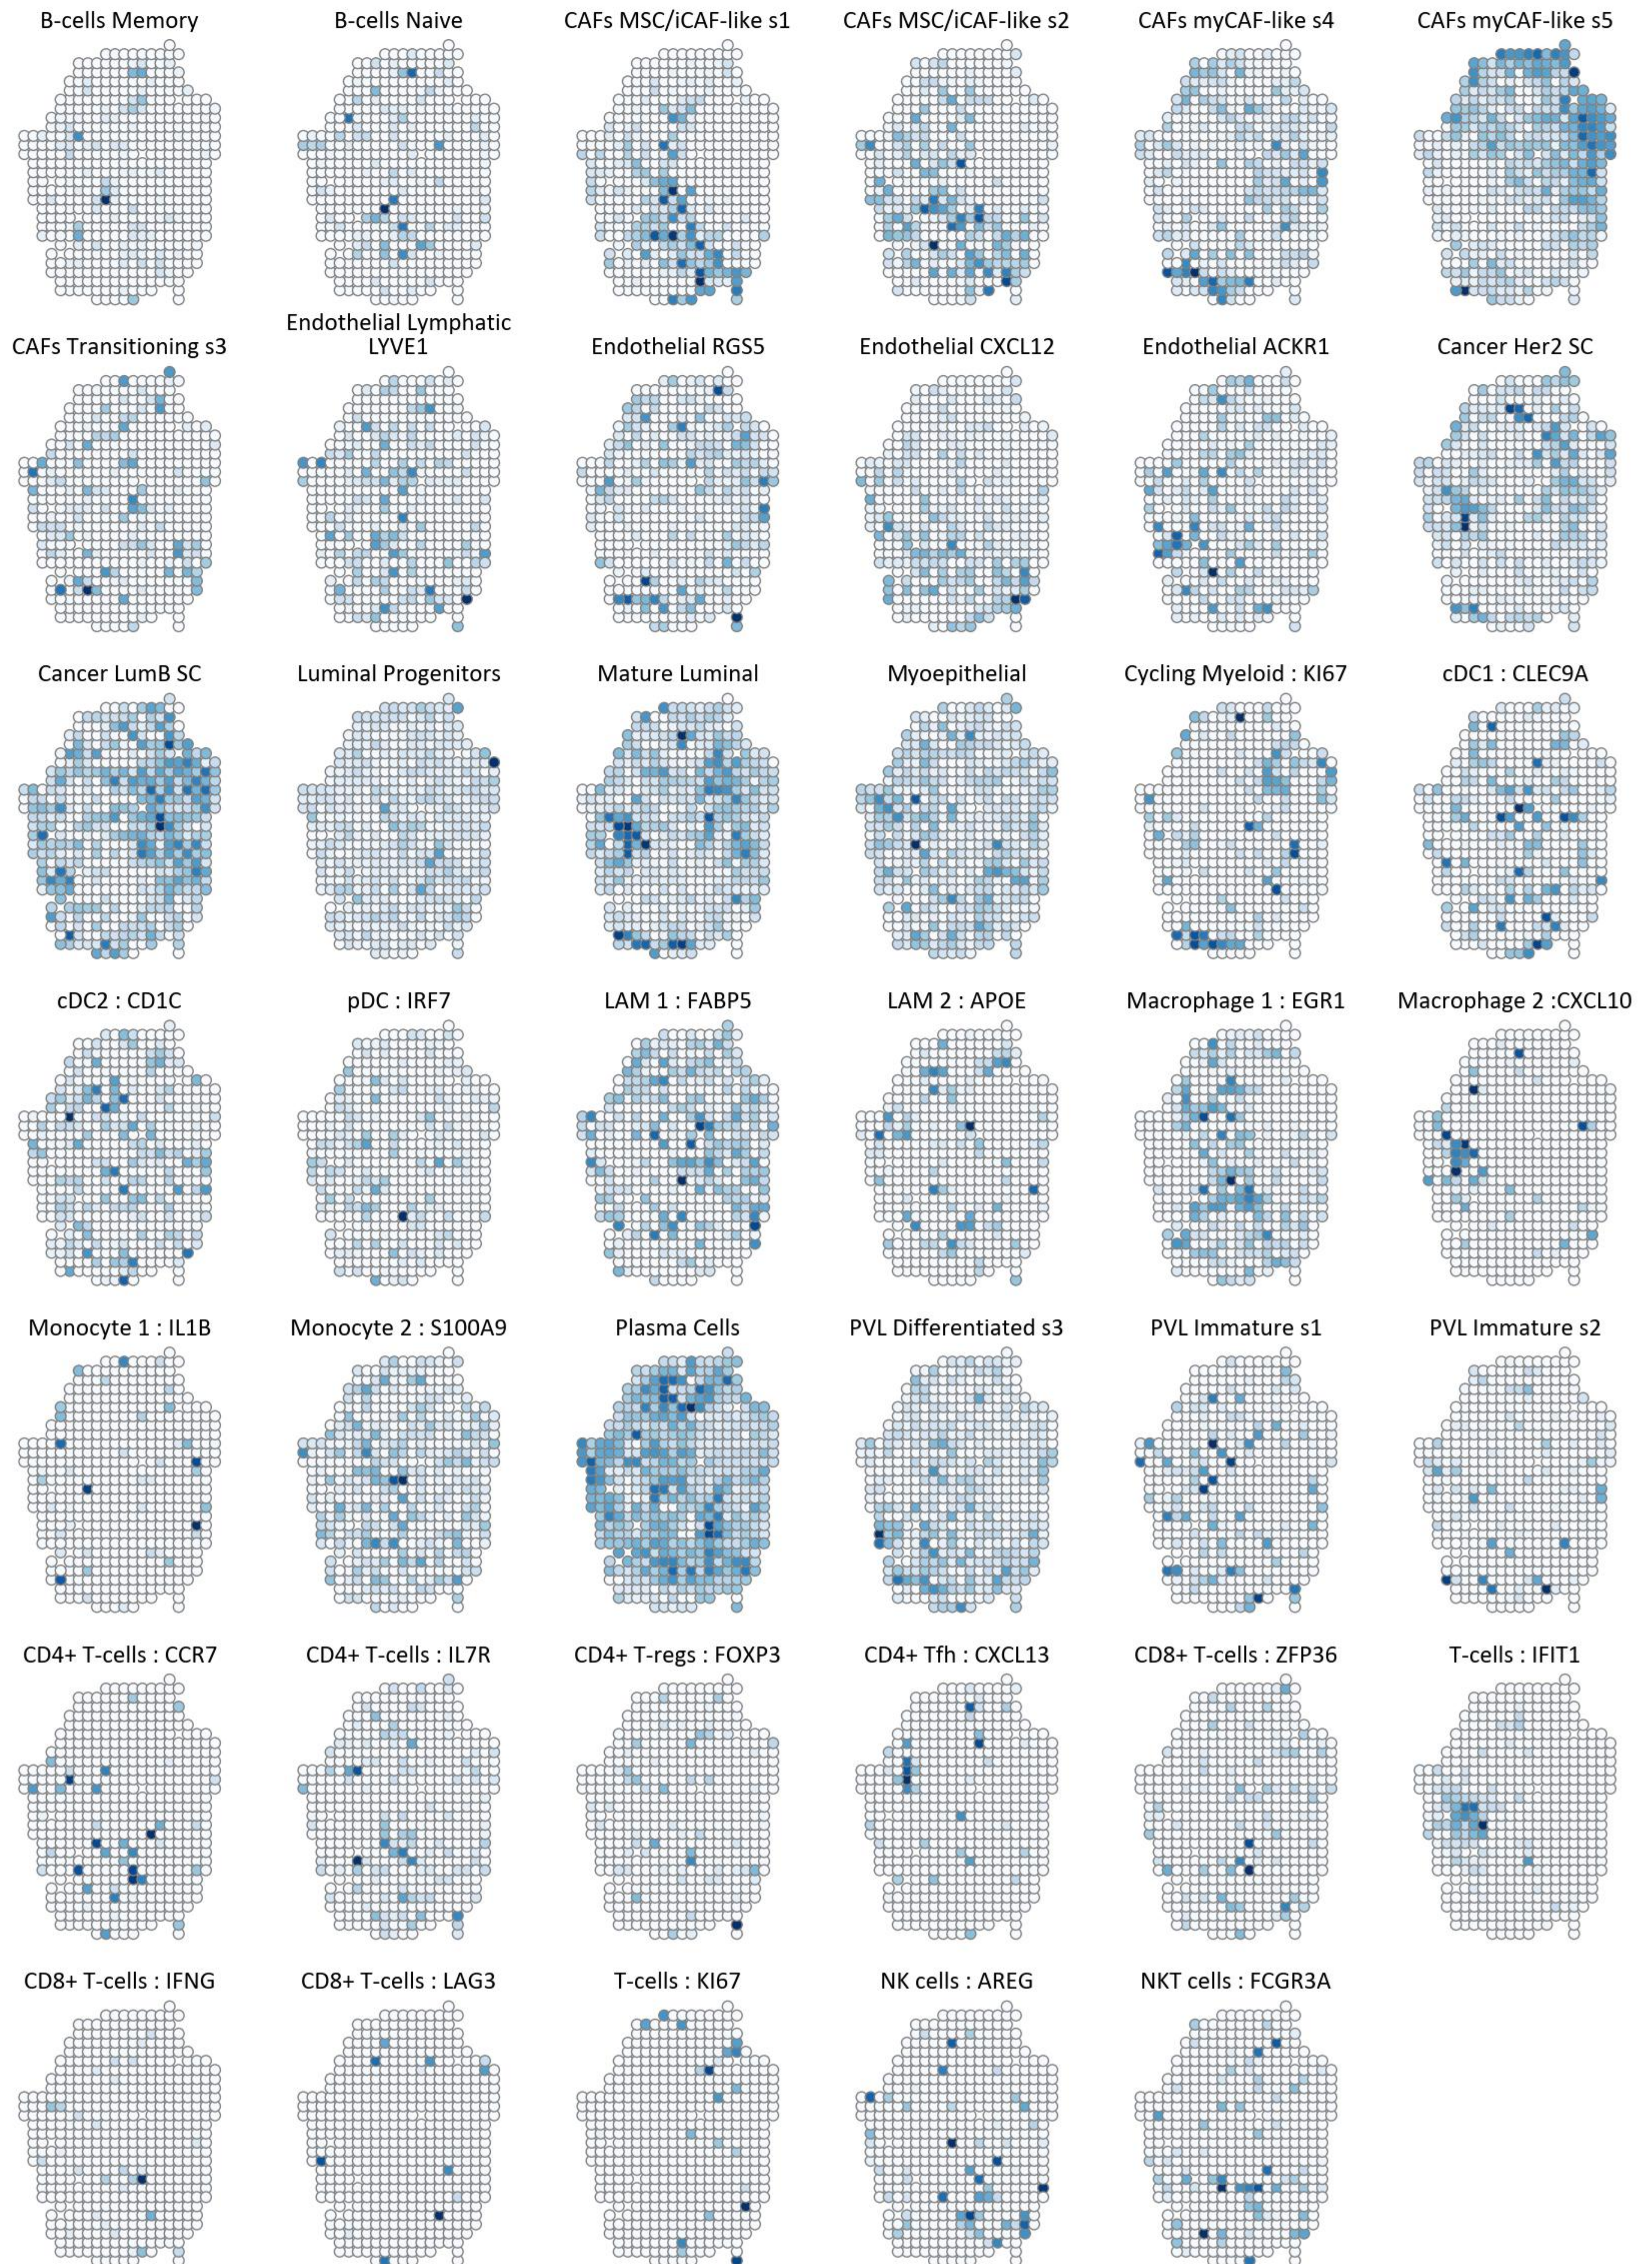

# subset\_C4

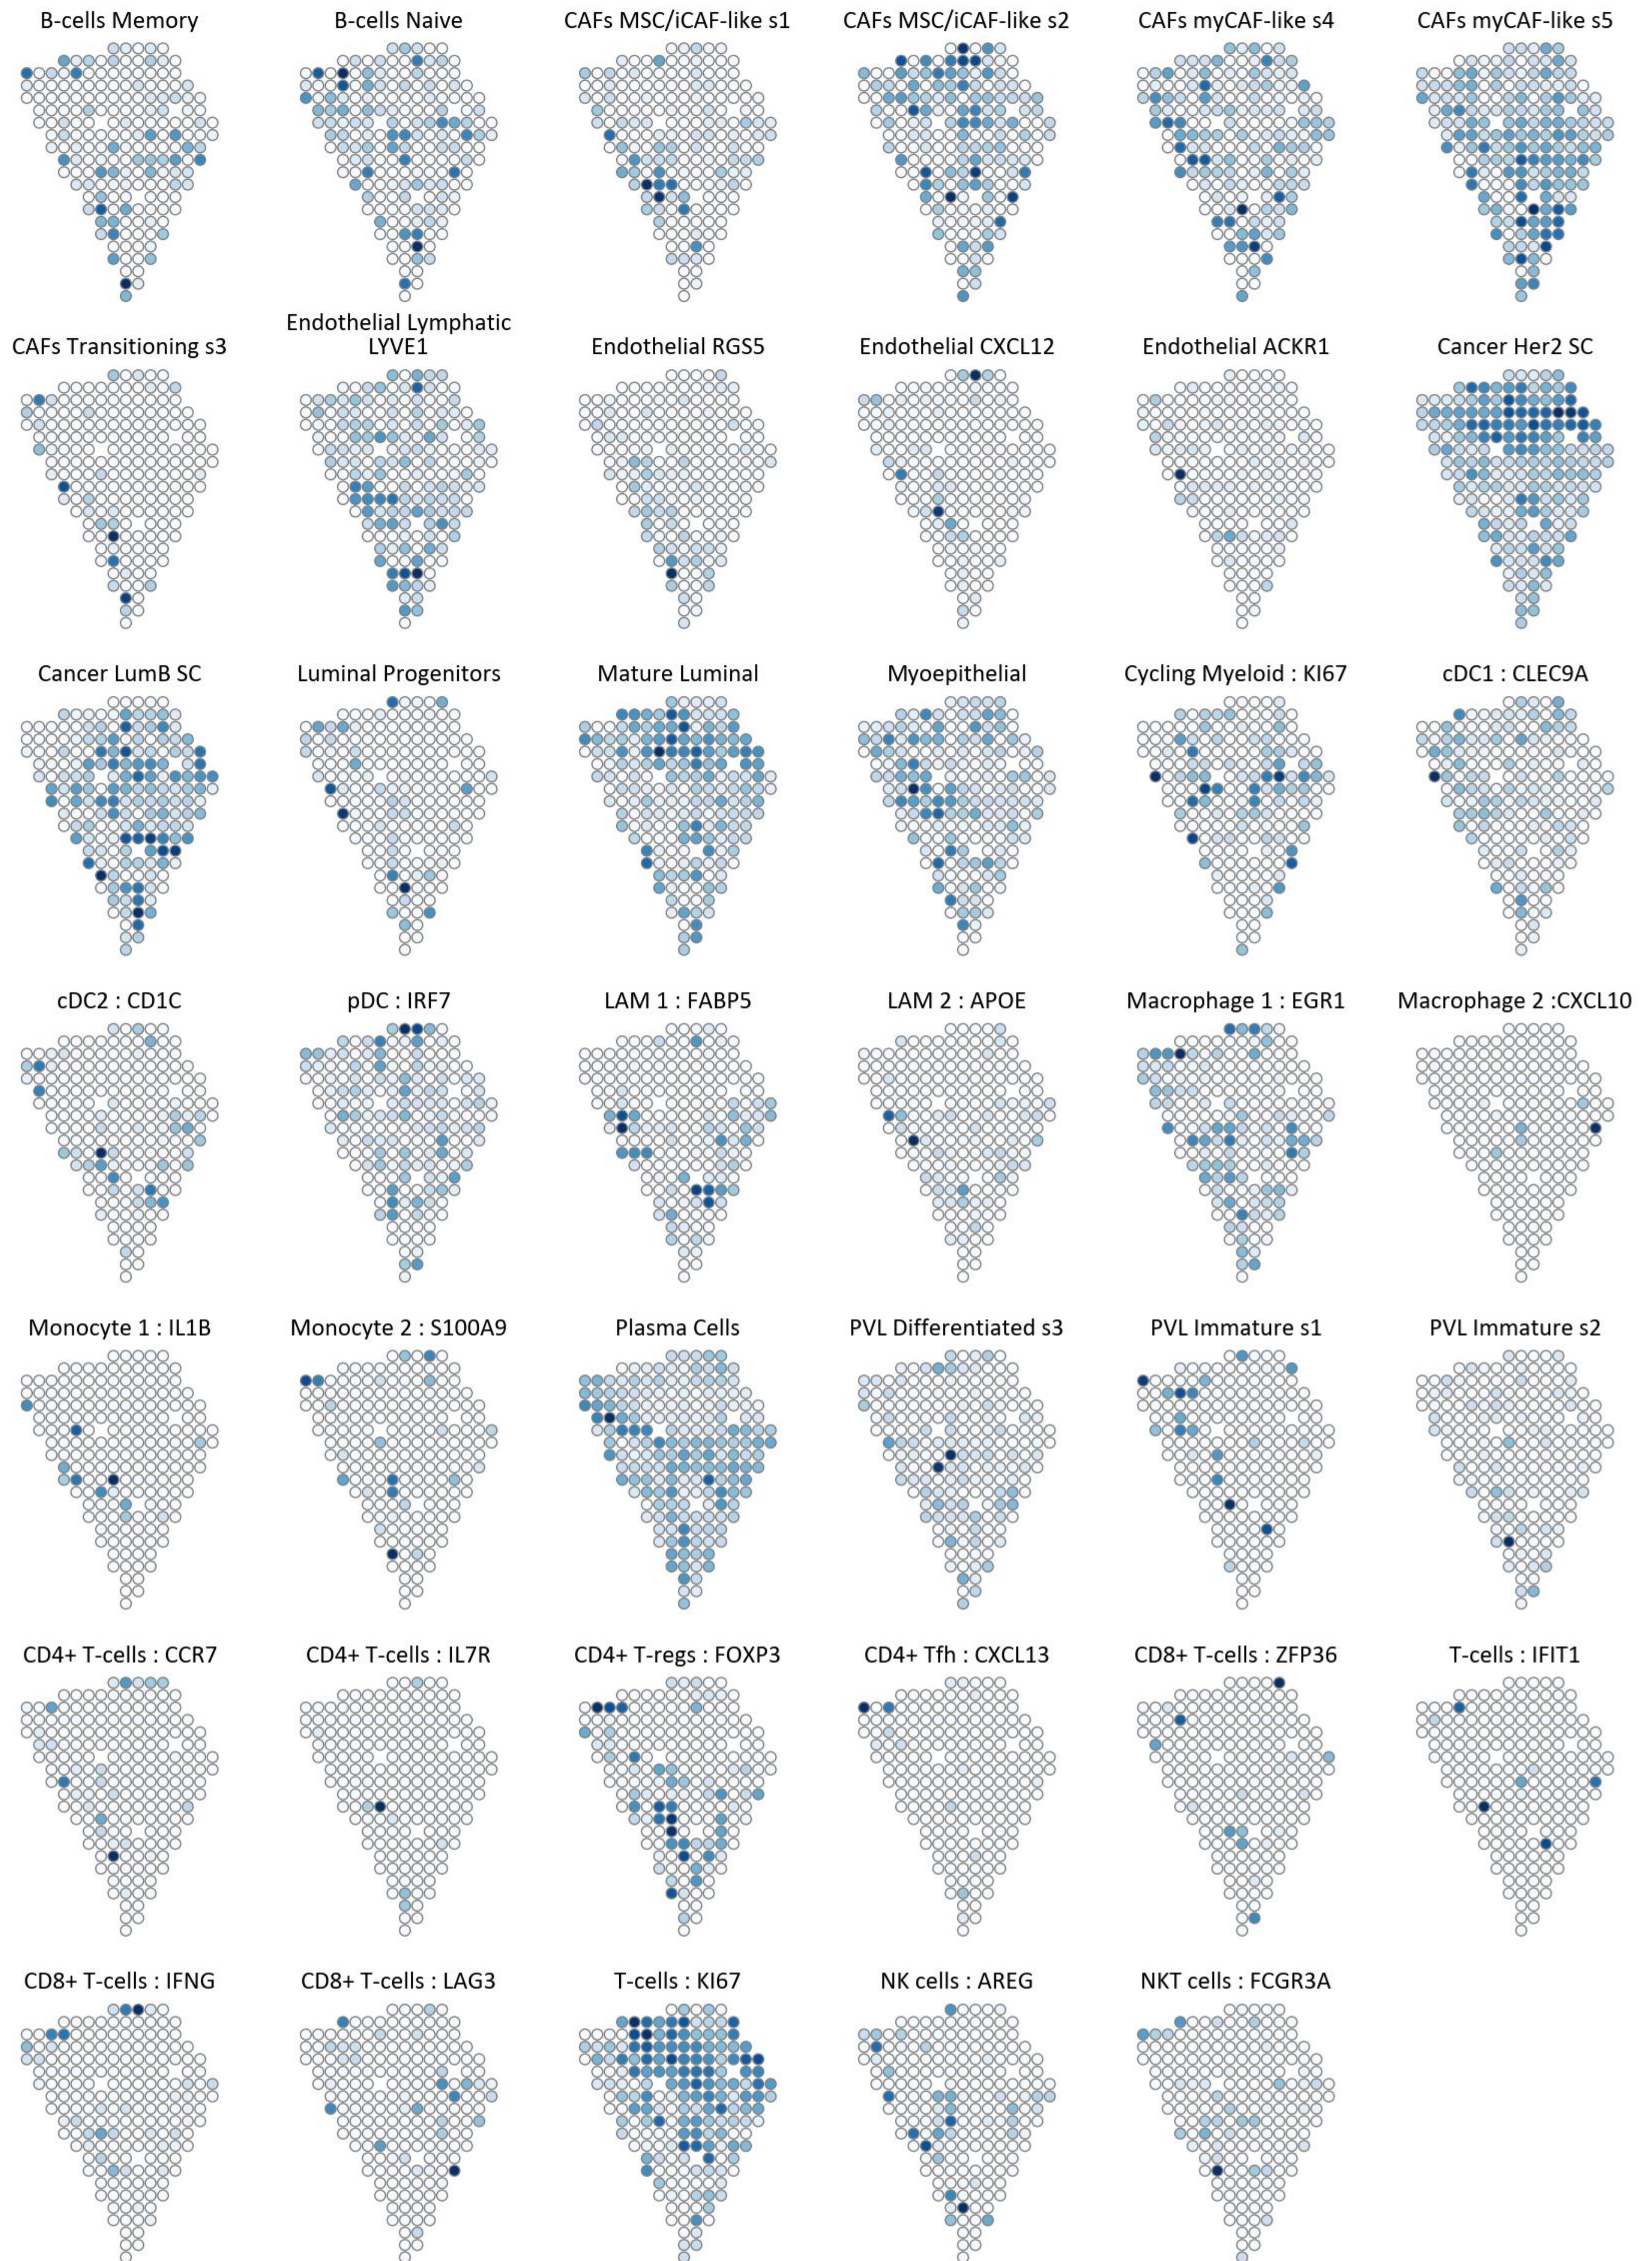

# subset\_C2

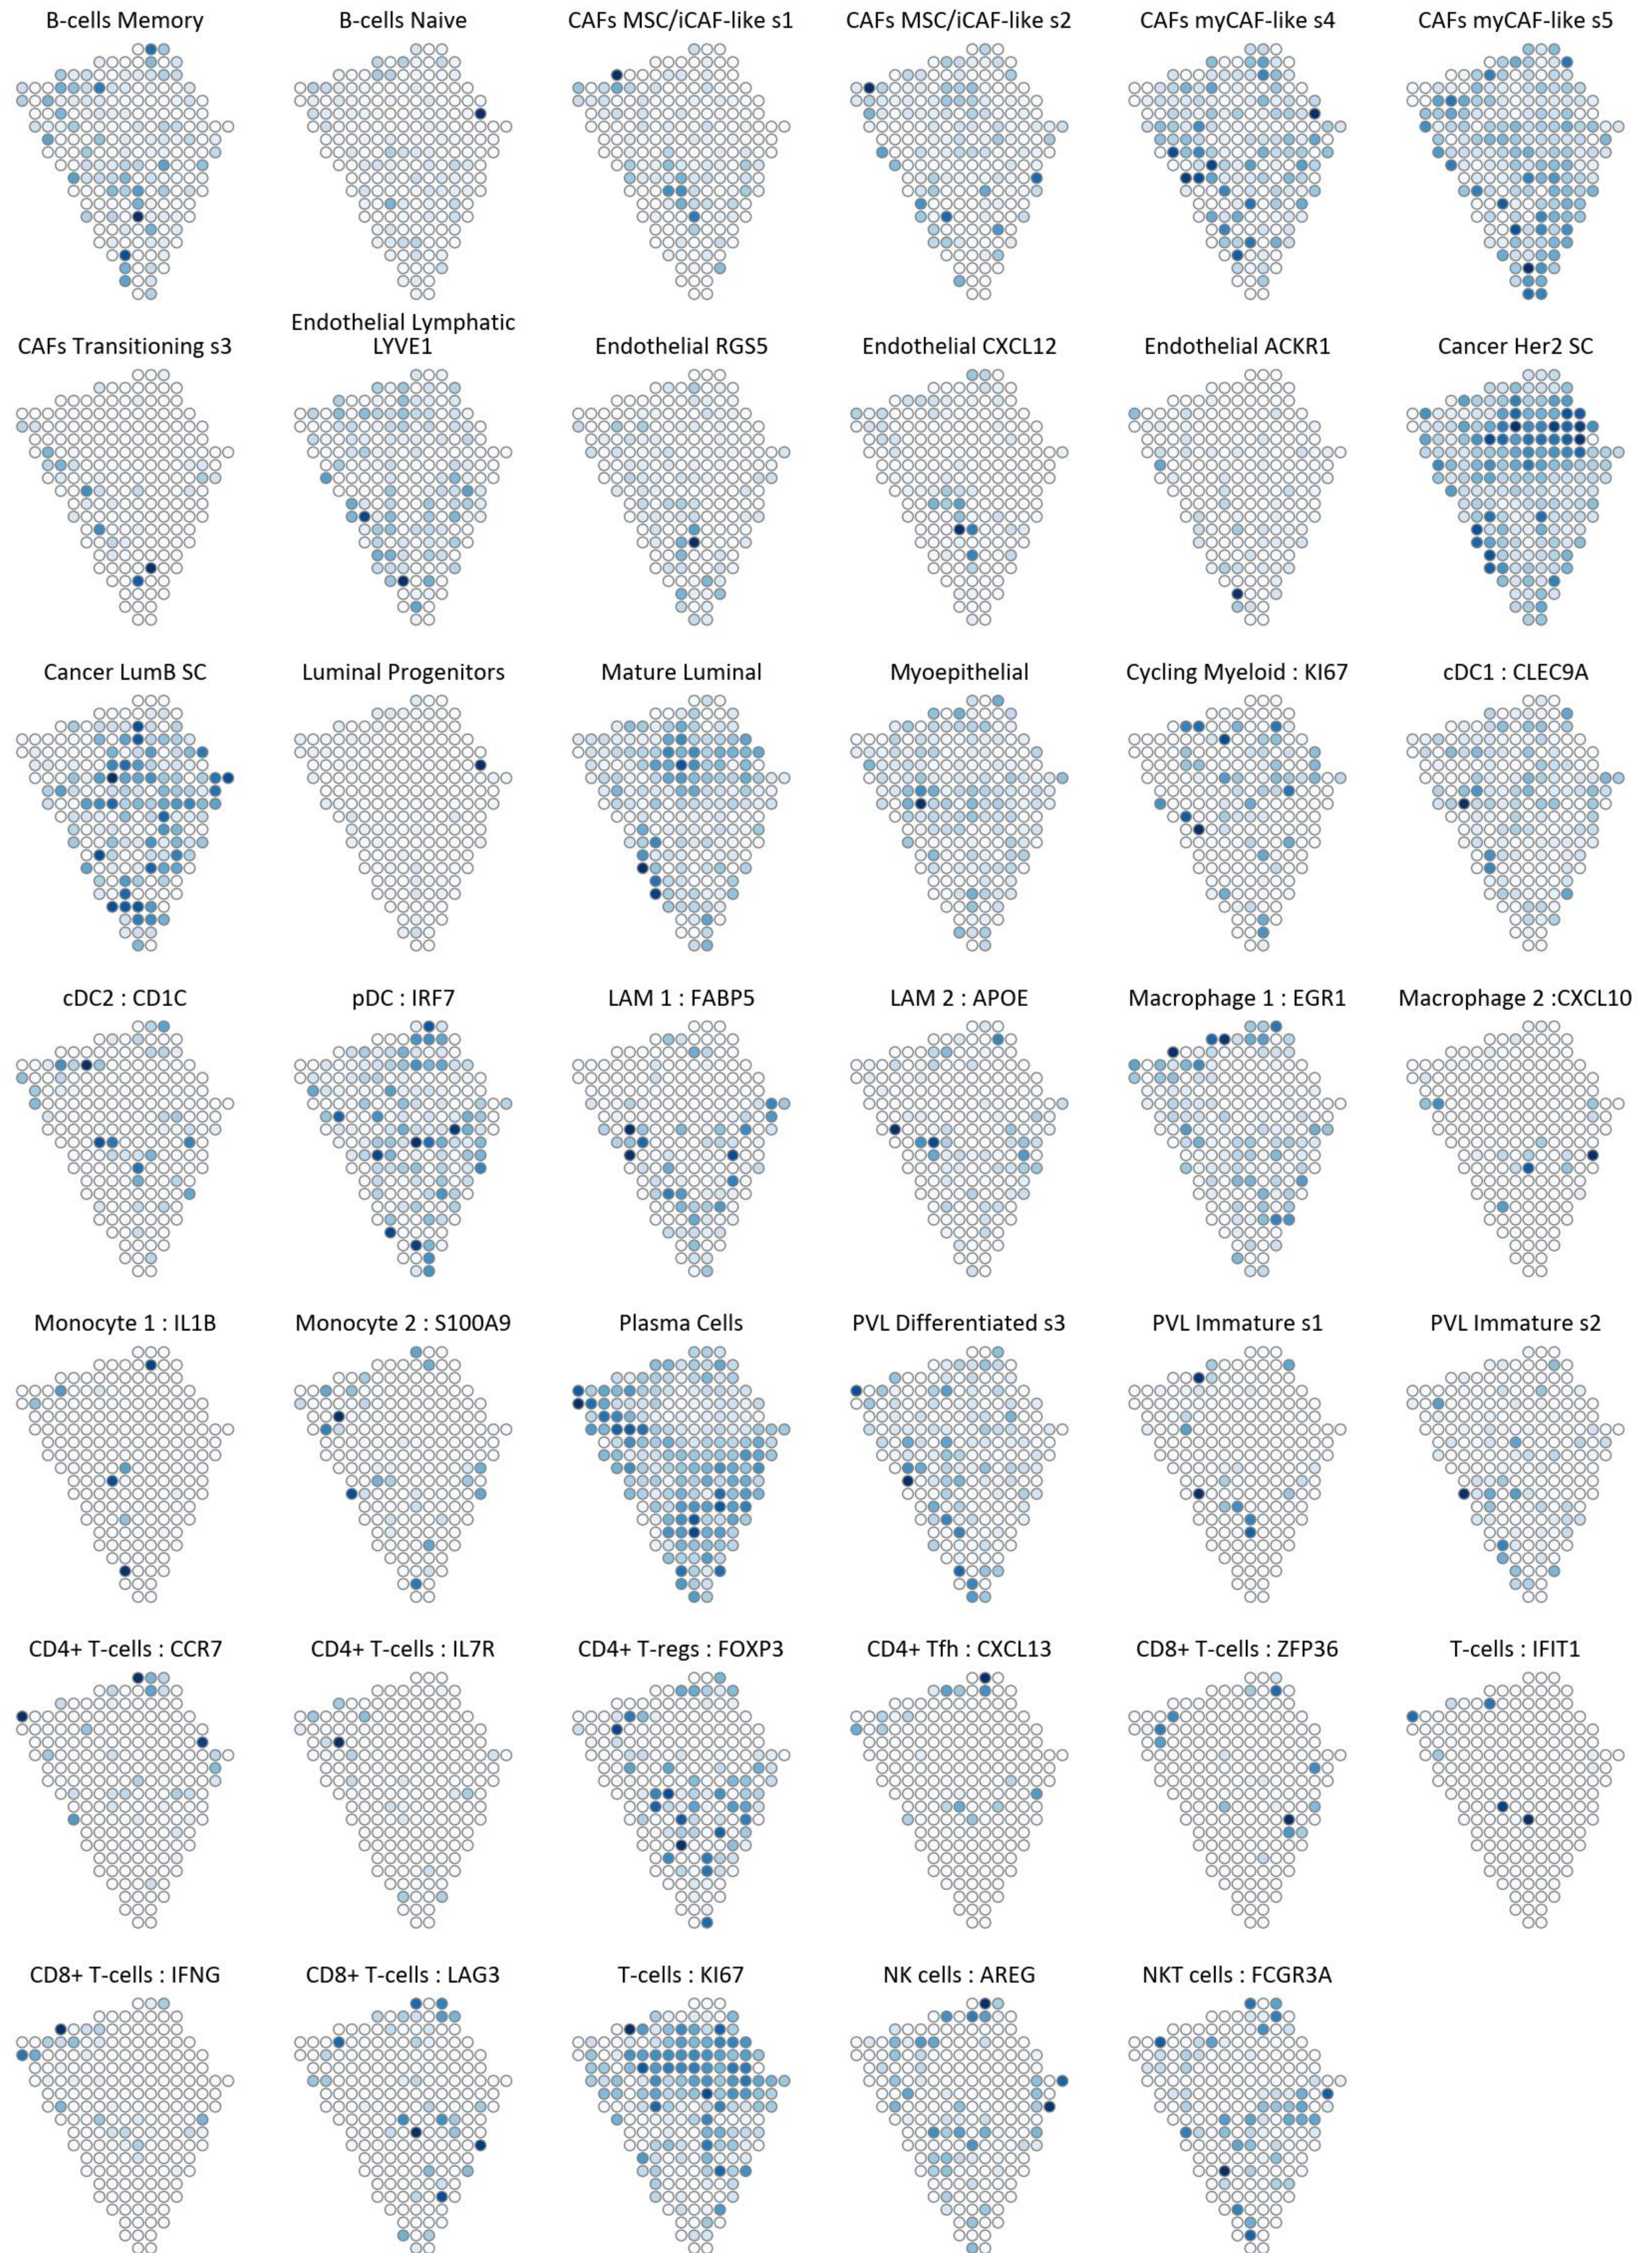

# subset\_C5

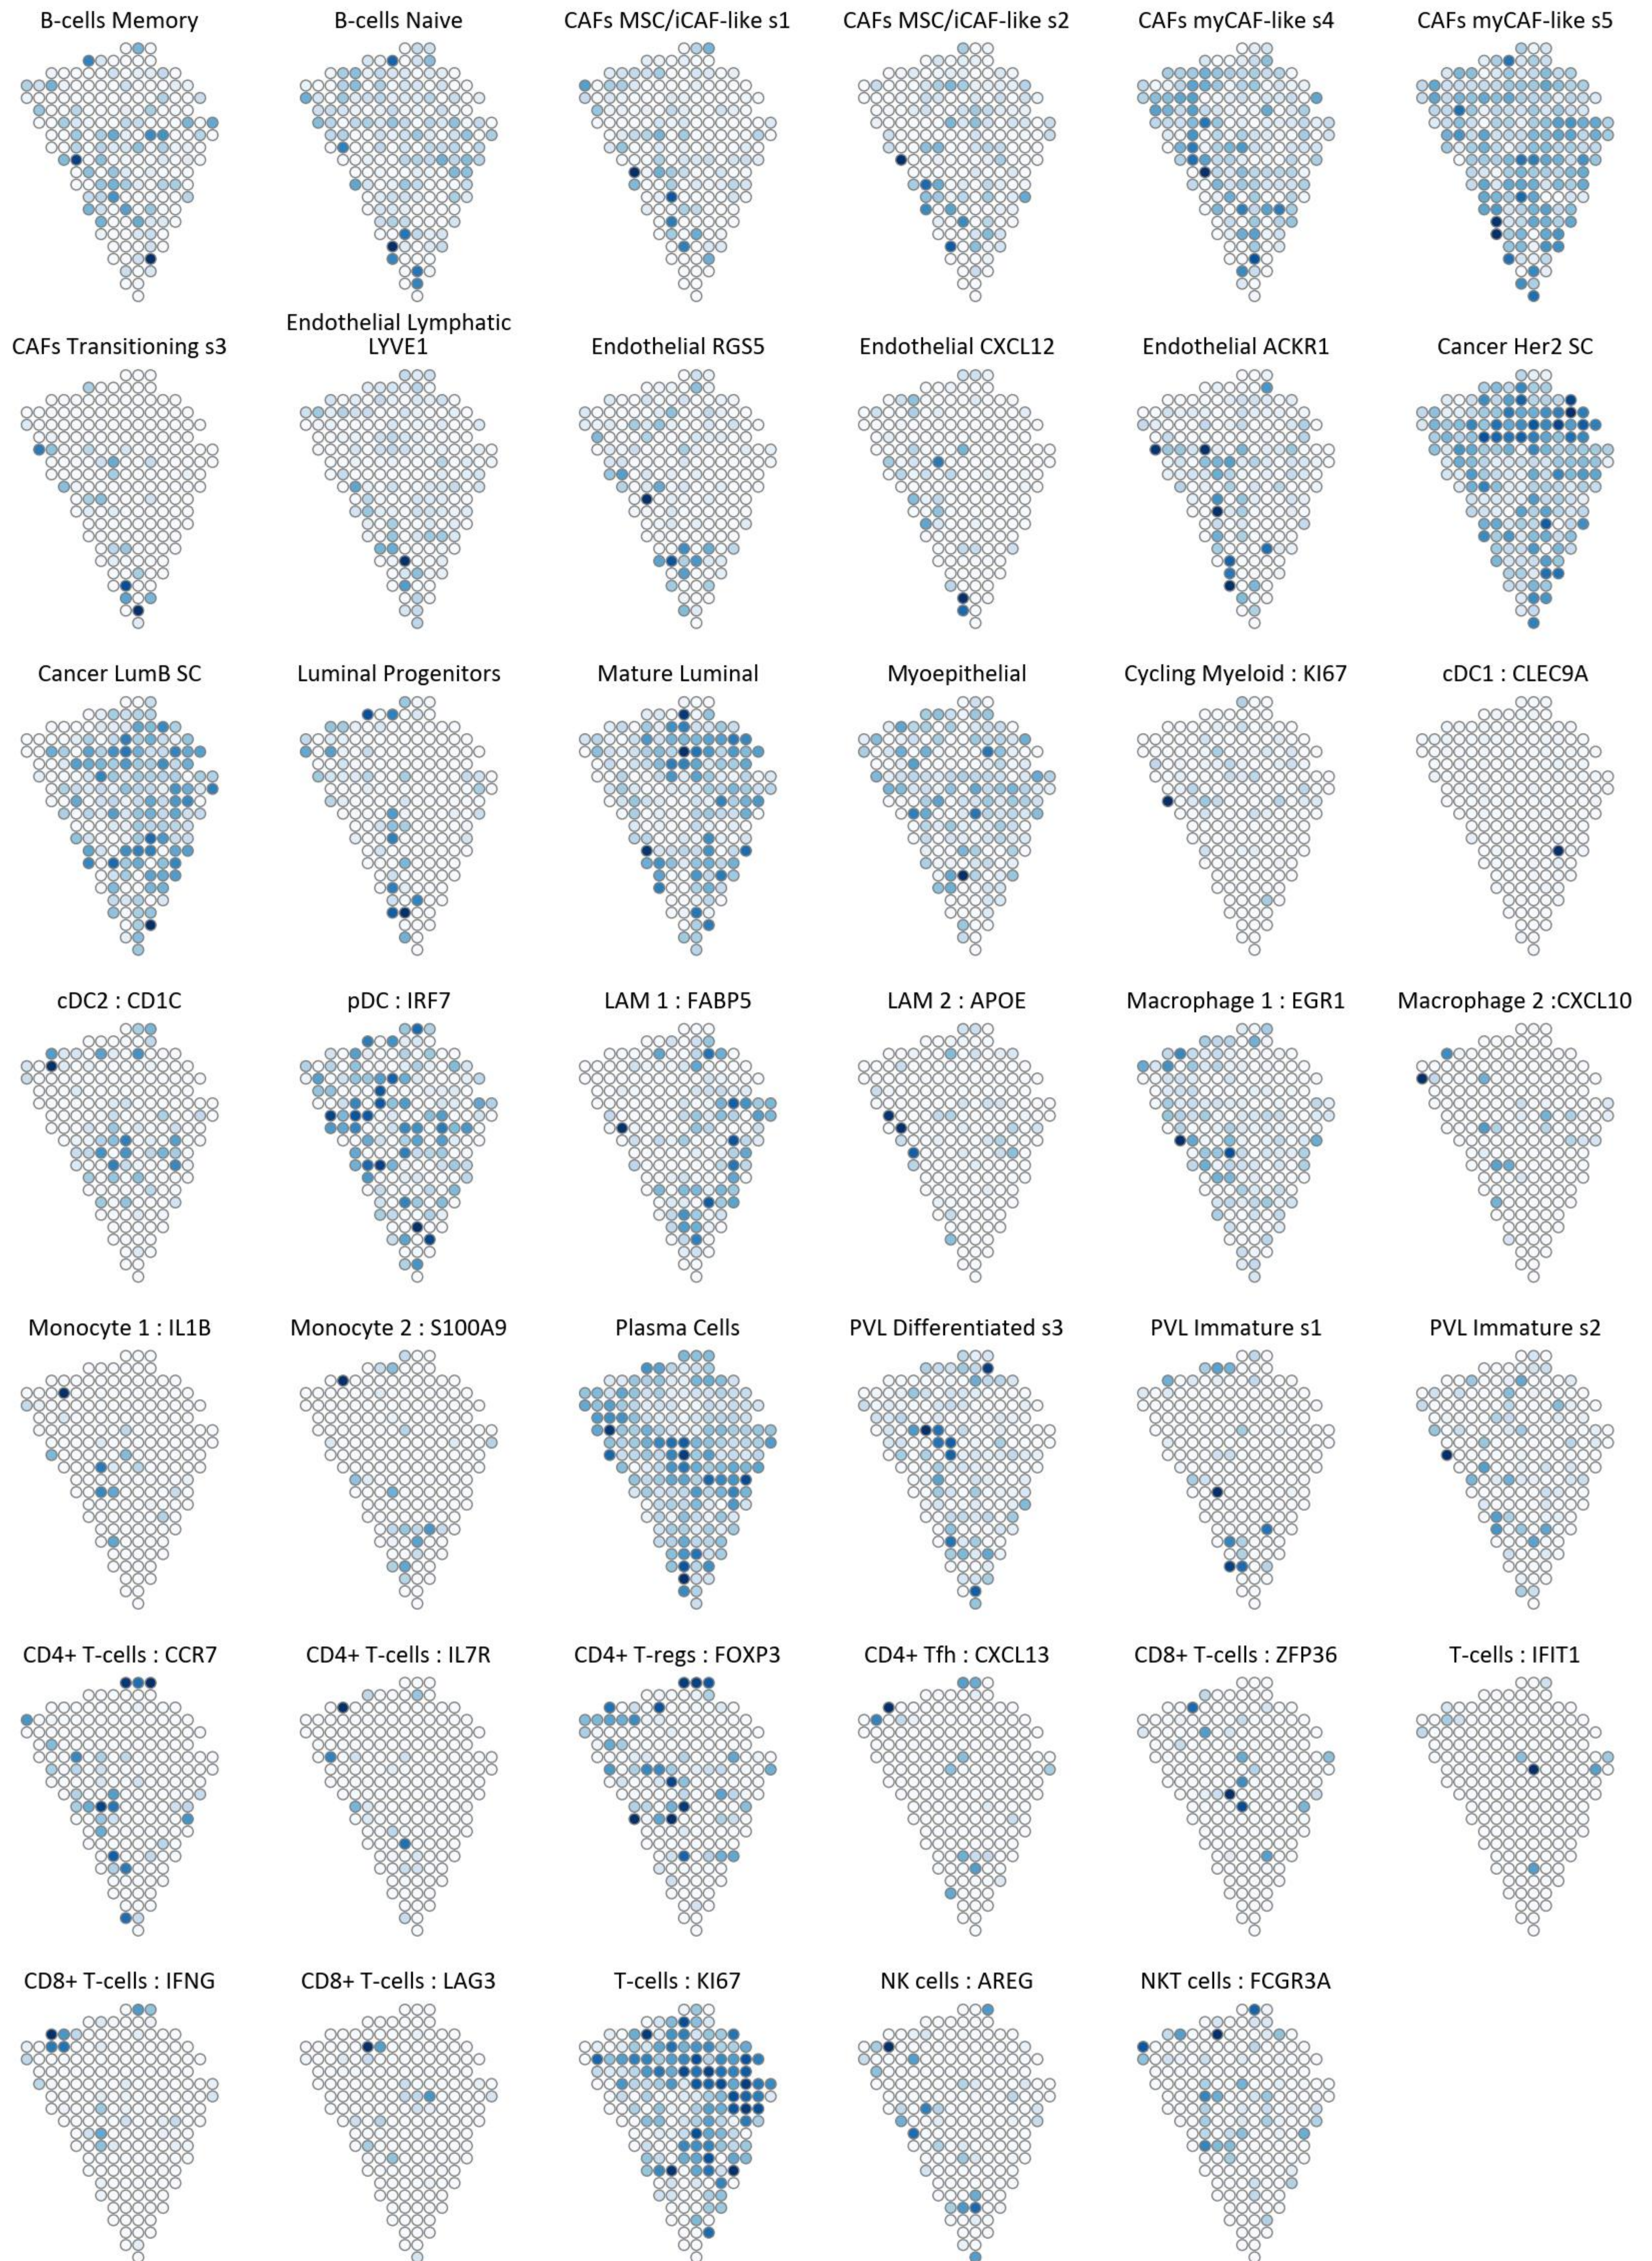

# subset\_E1

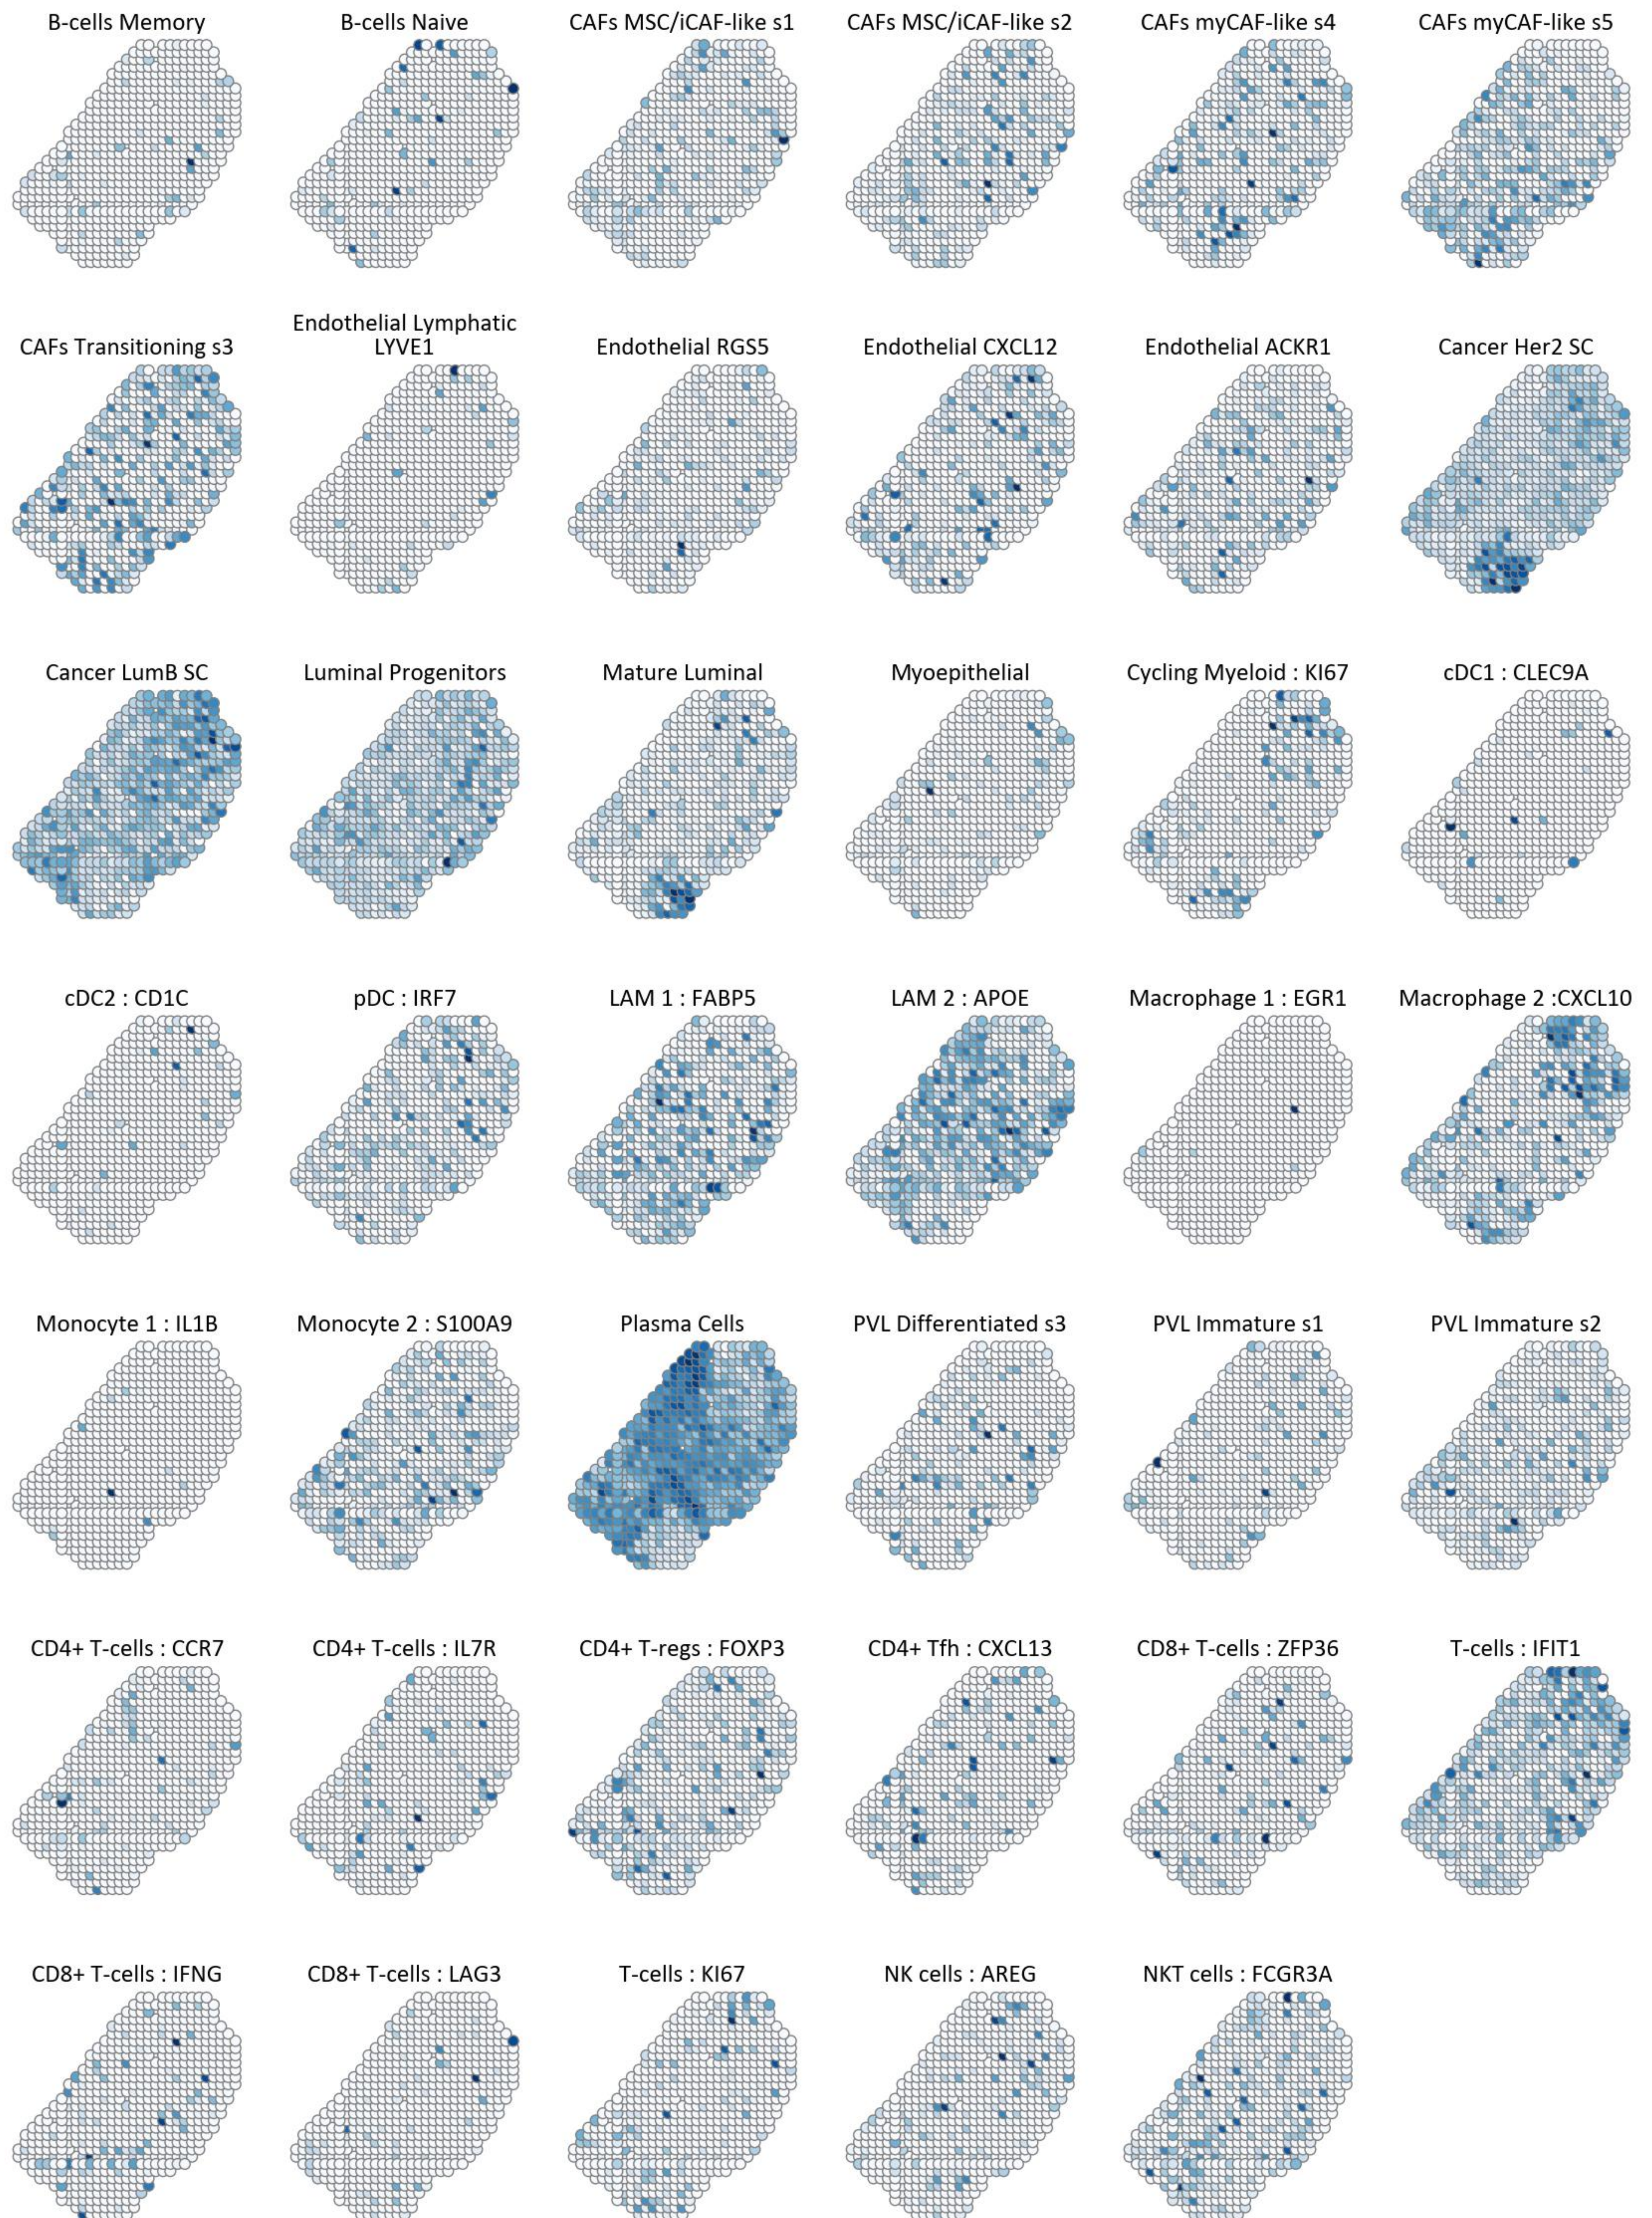

# subset\_B4

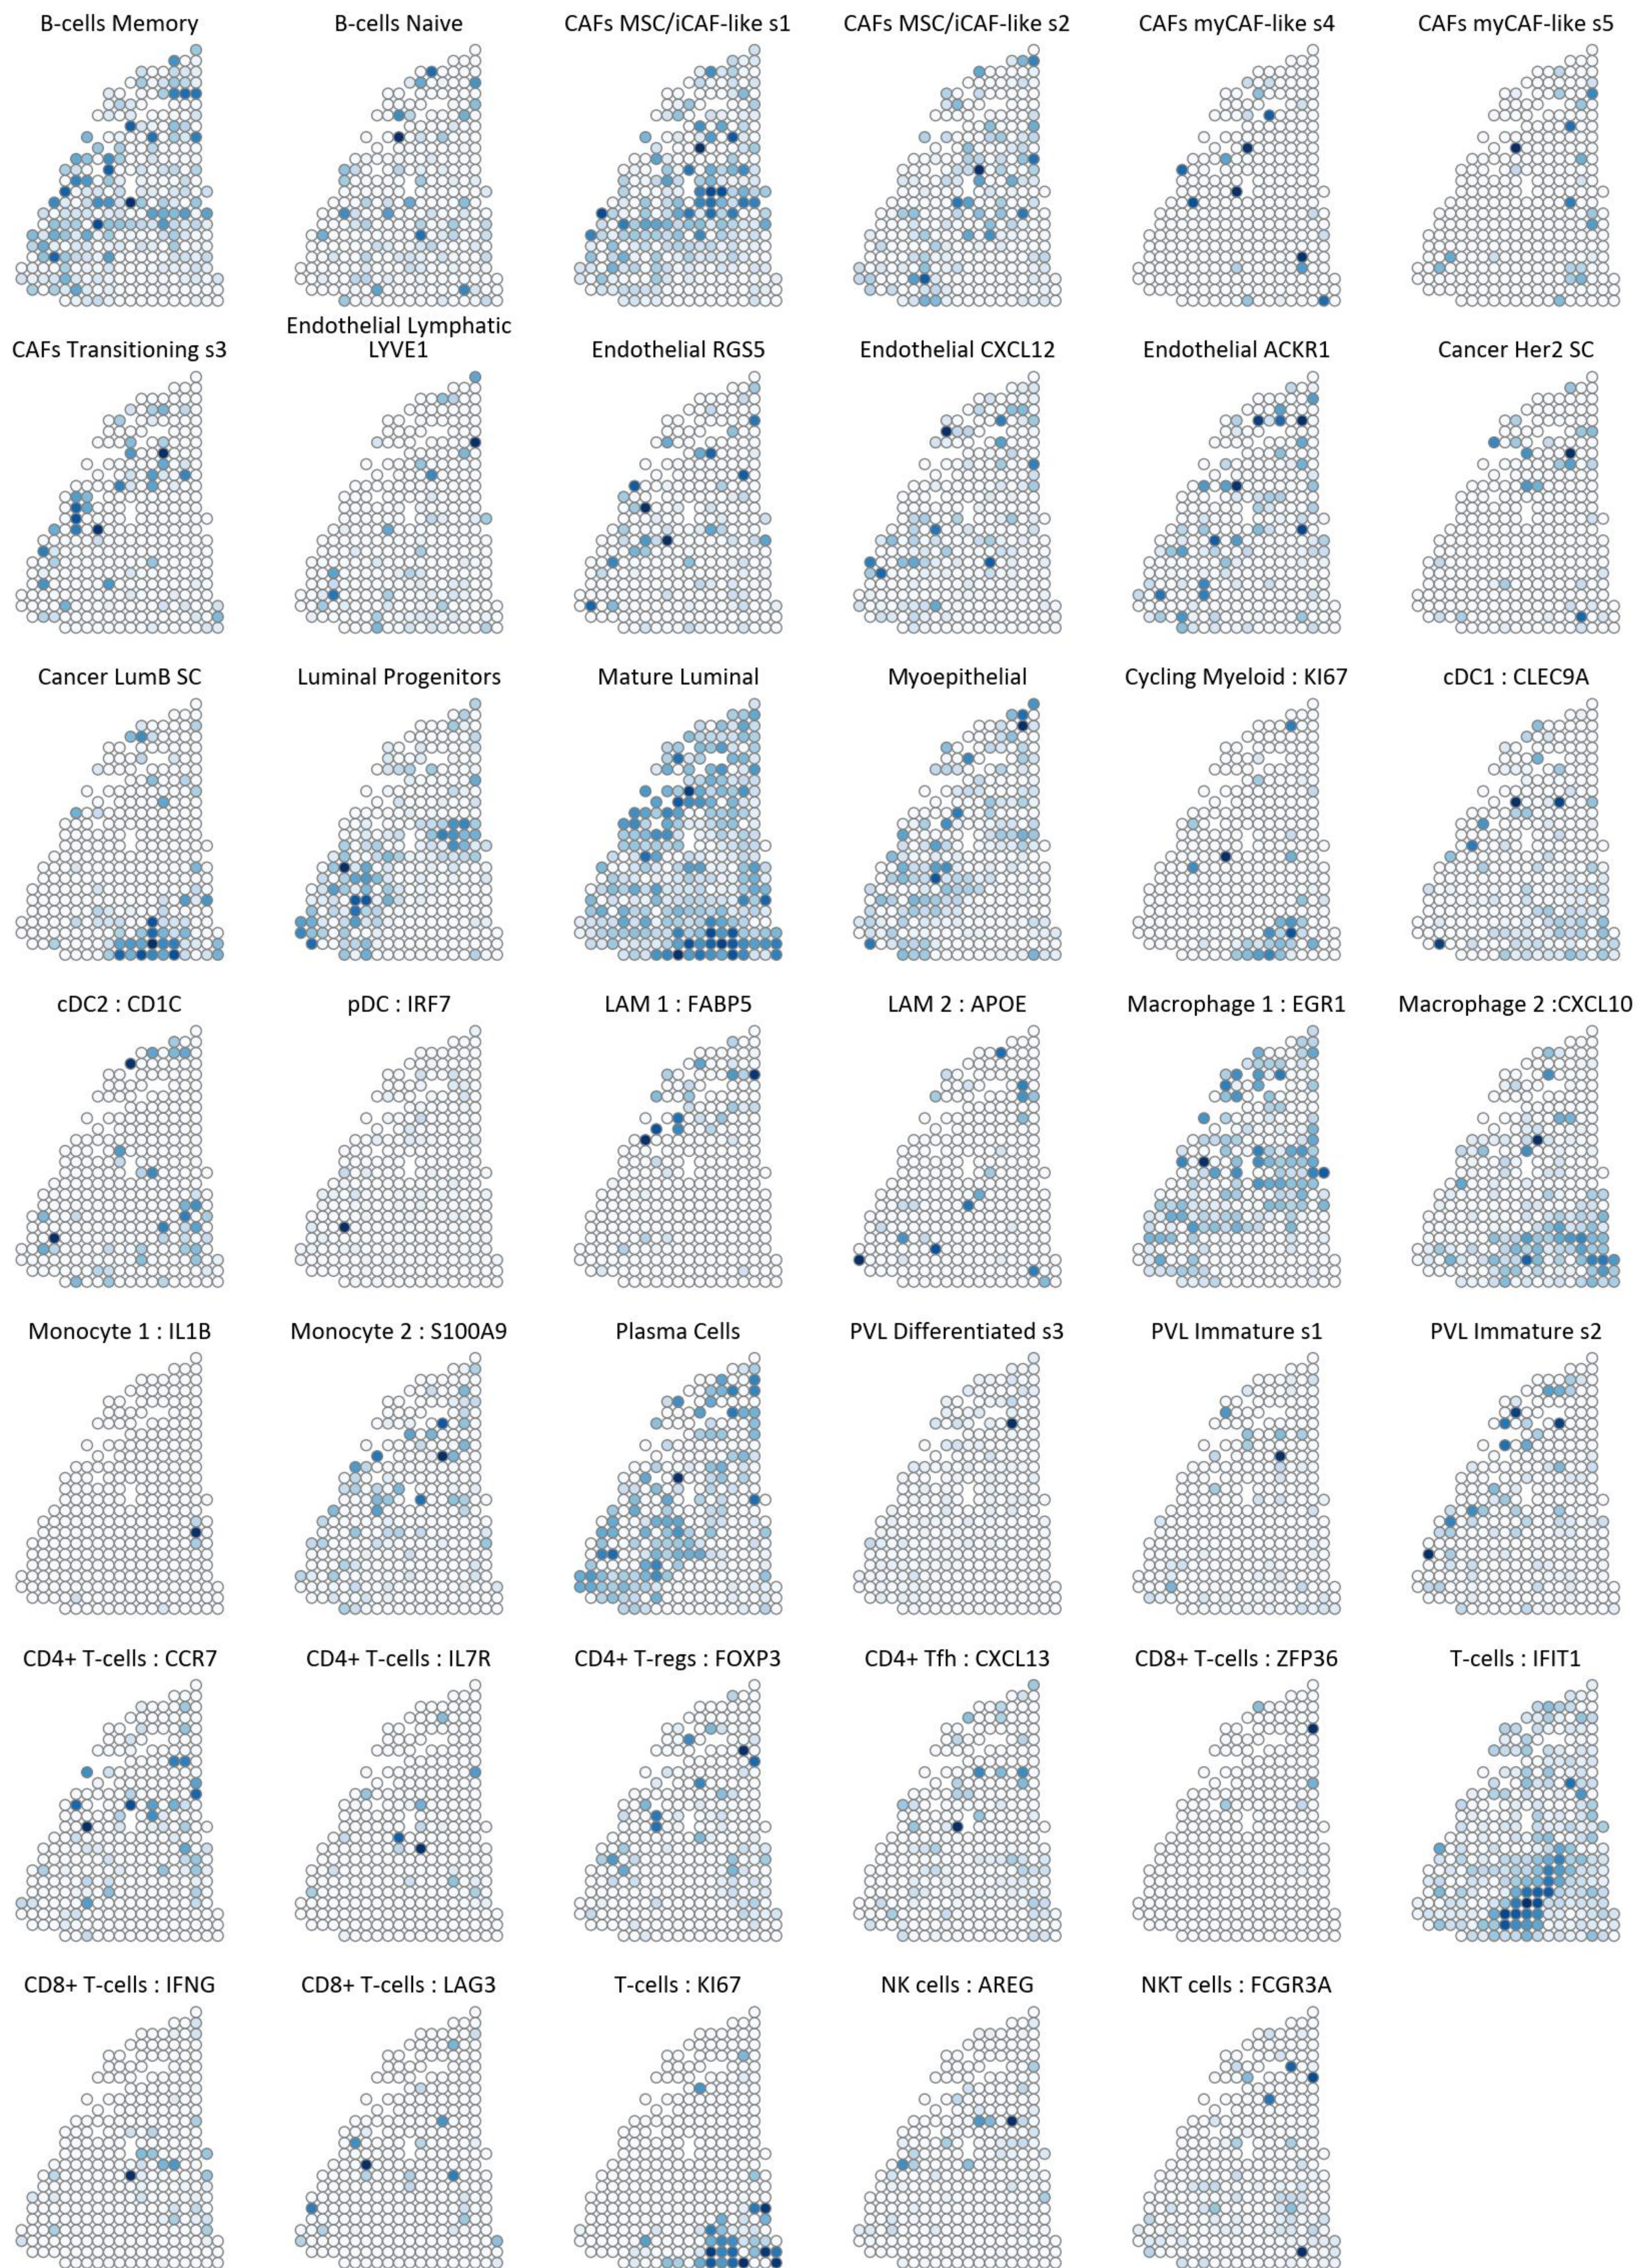

# subset\_A2

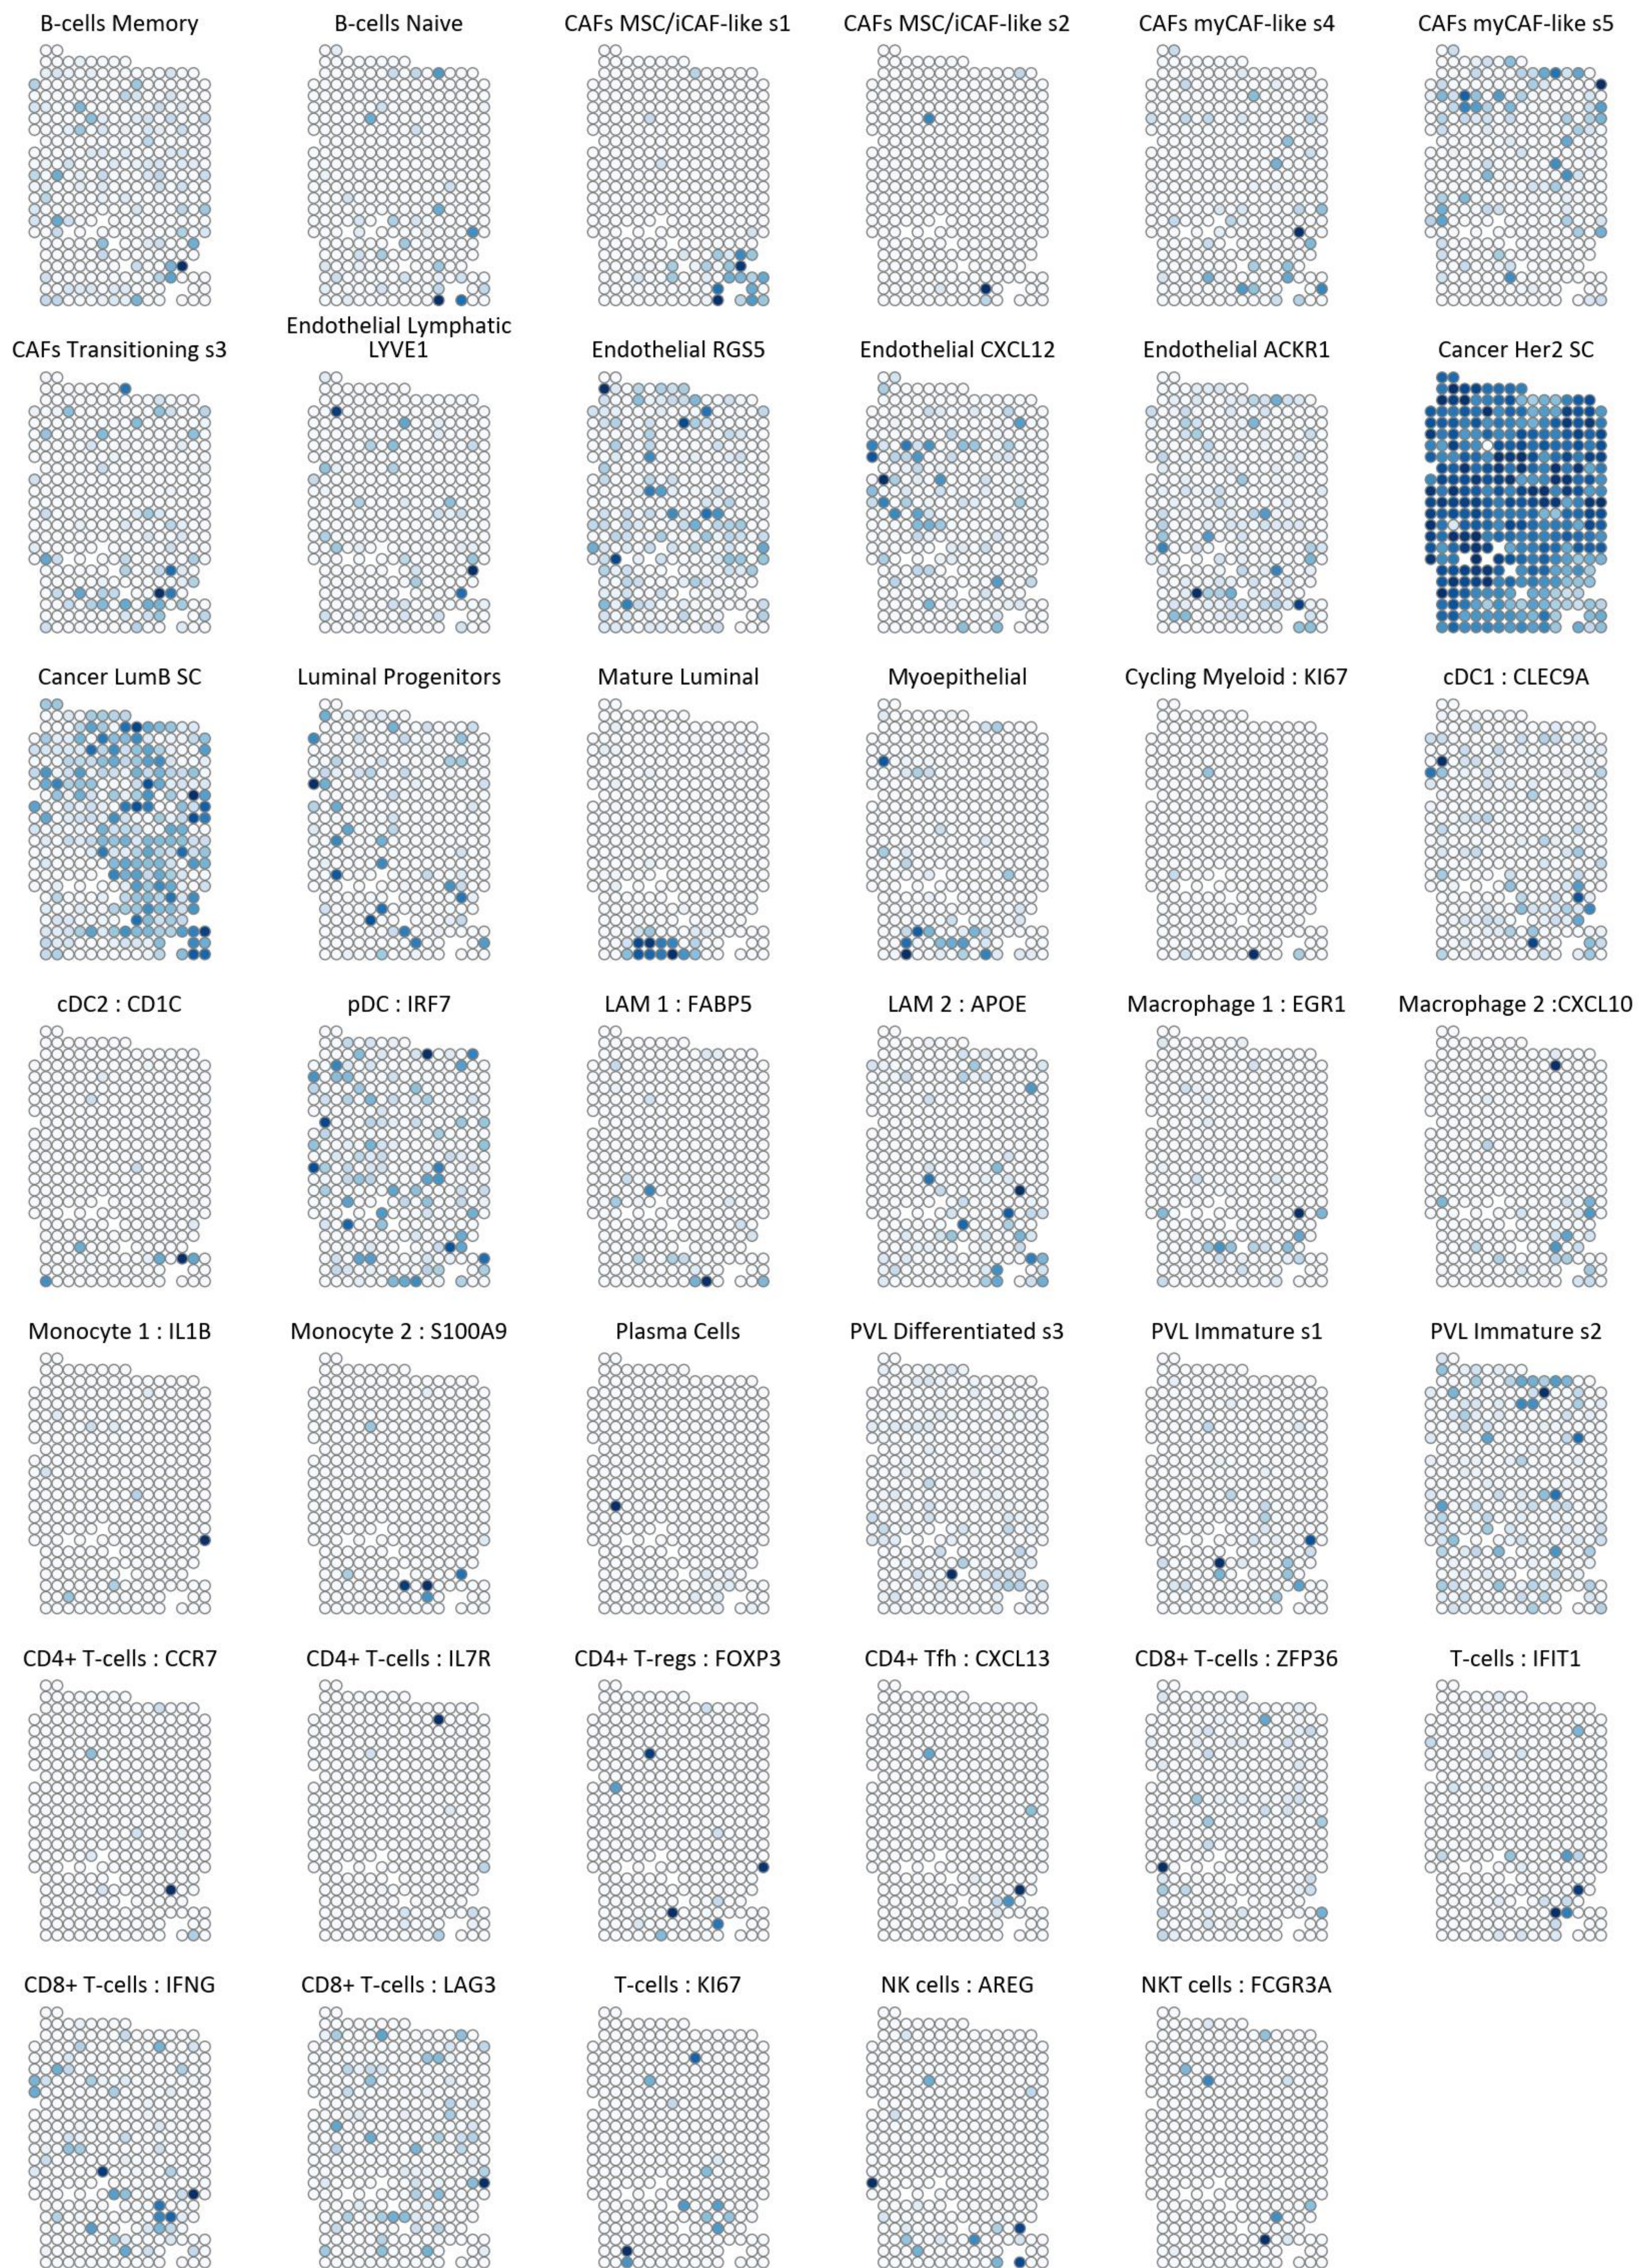



# subset\_A4

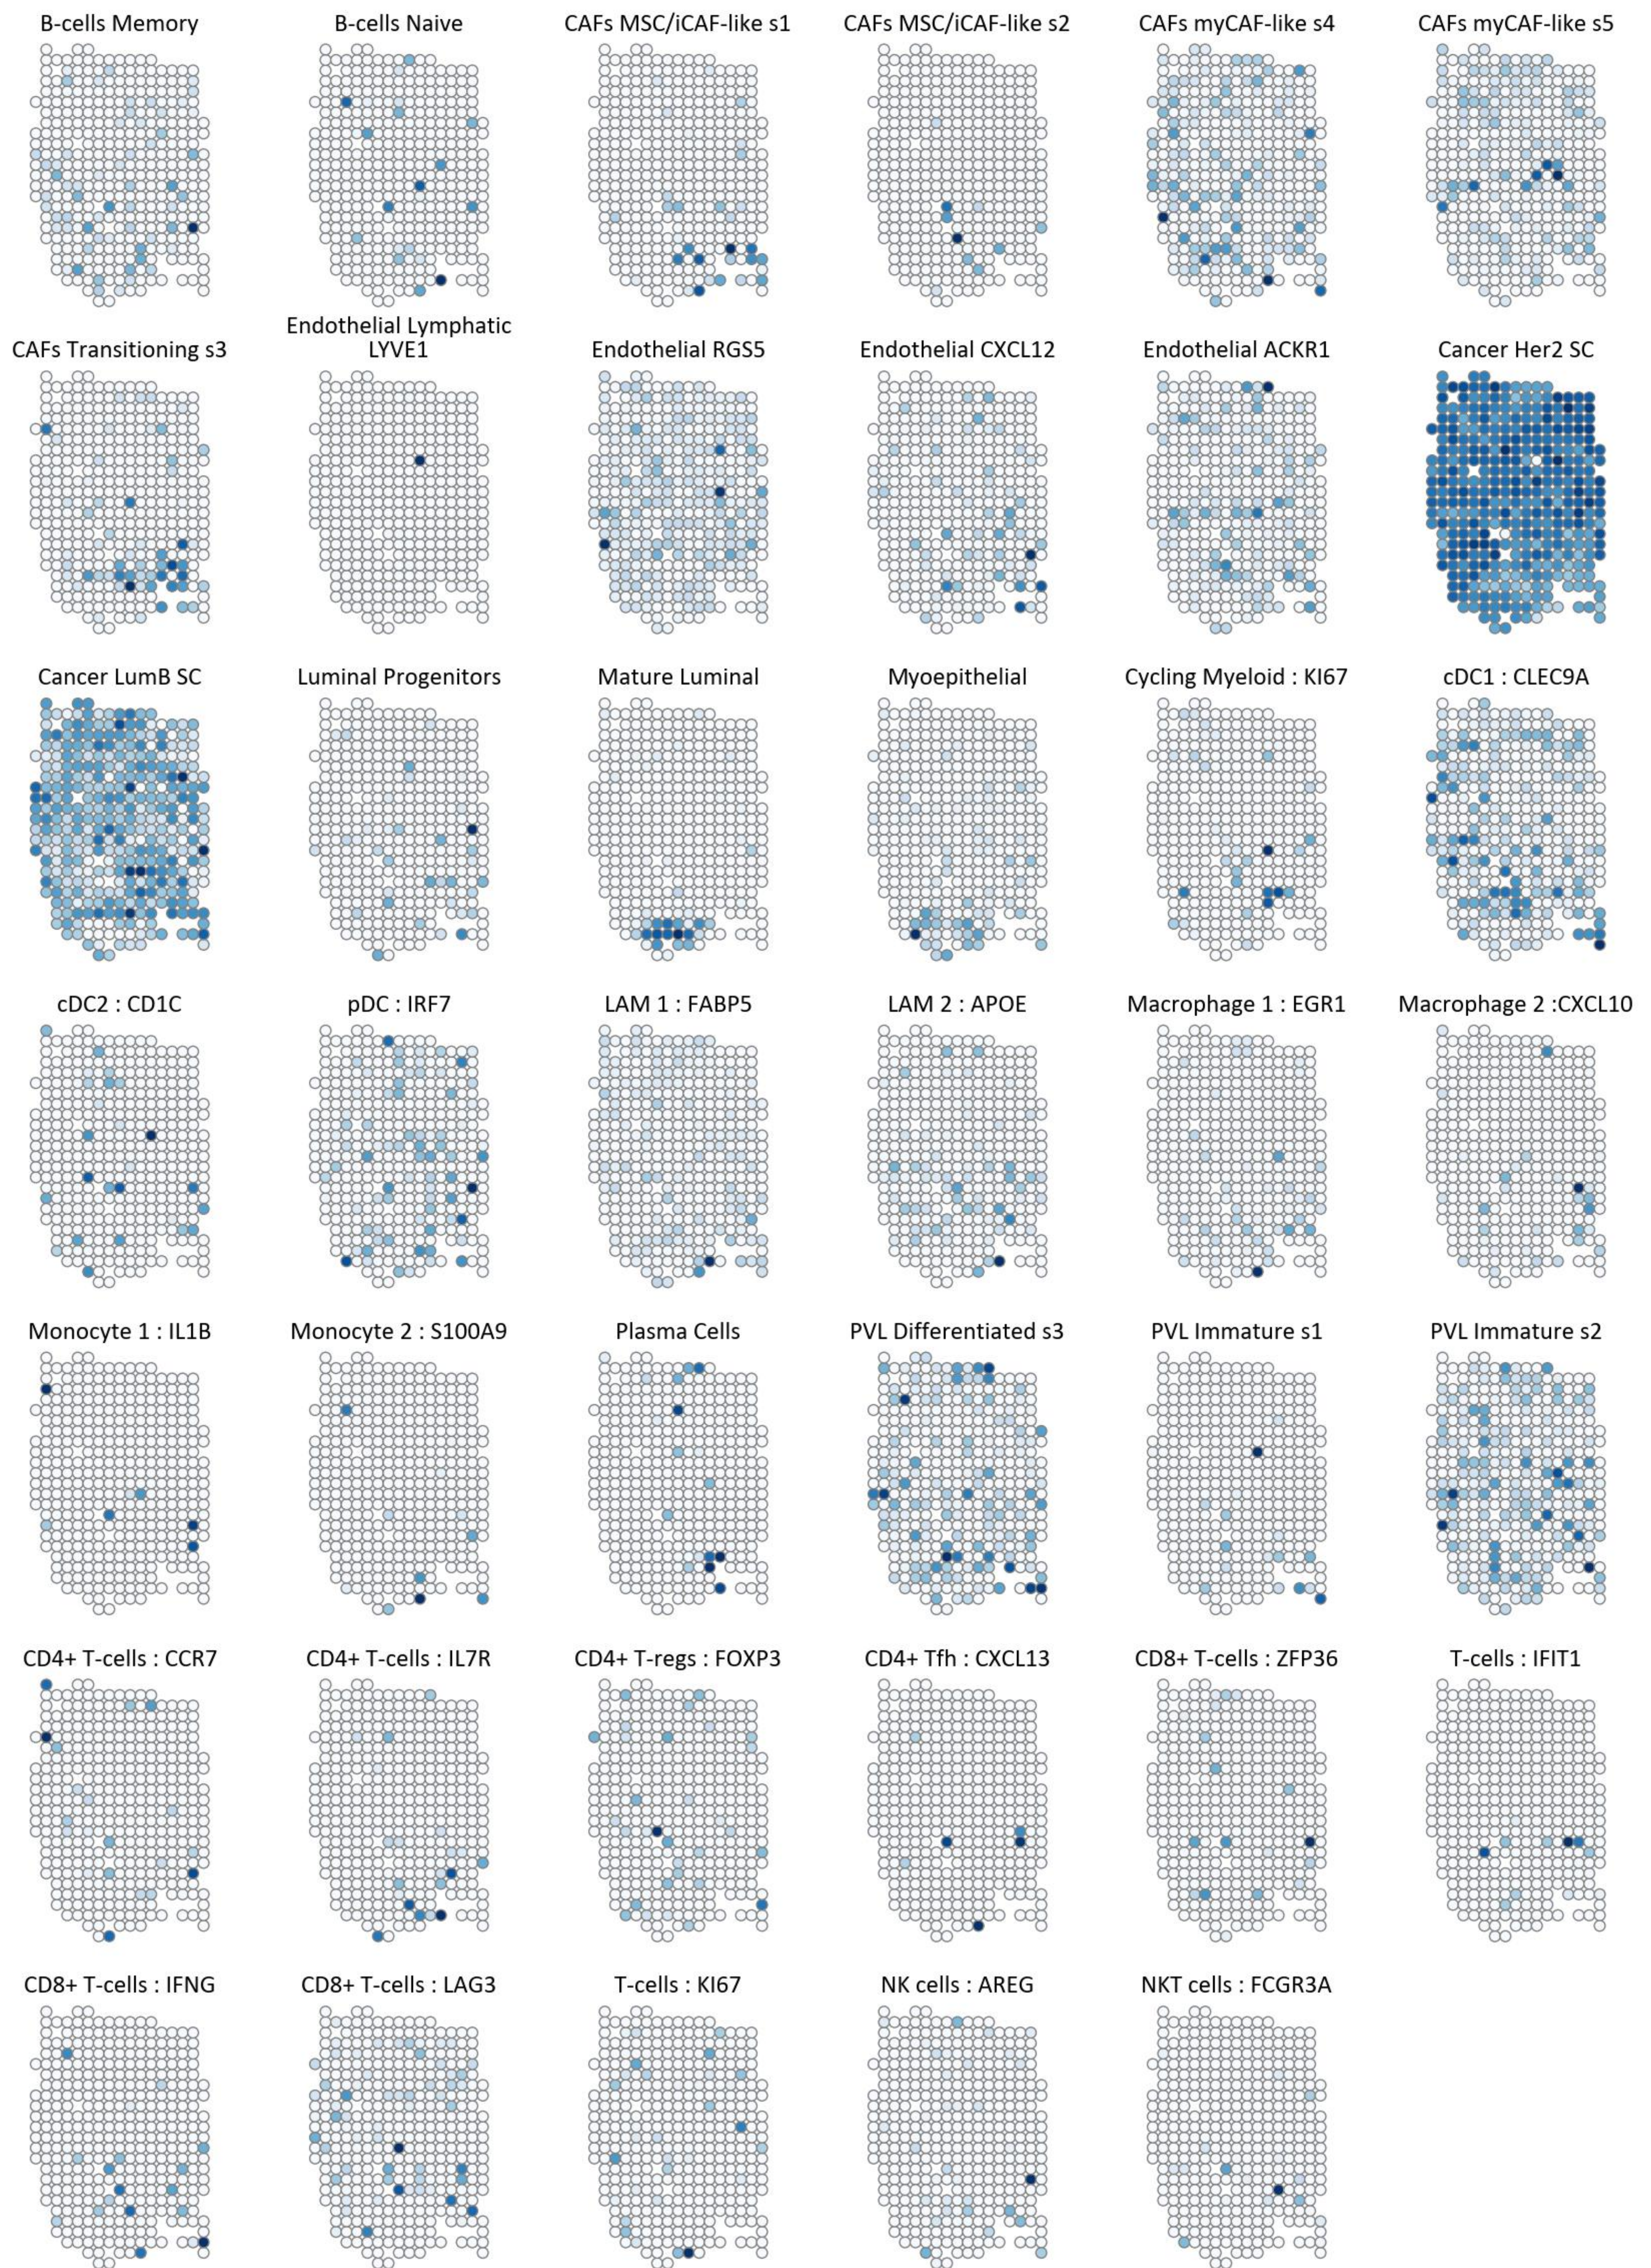

# subset\_A1

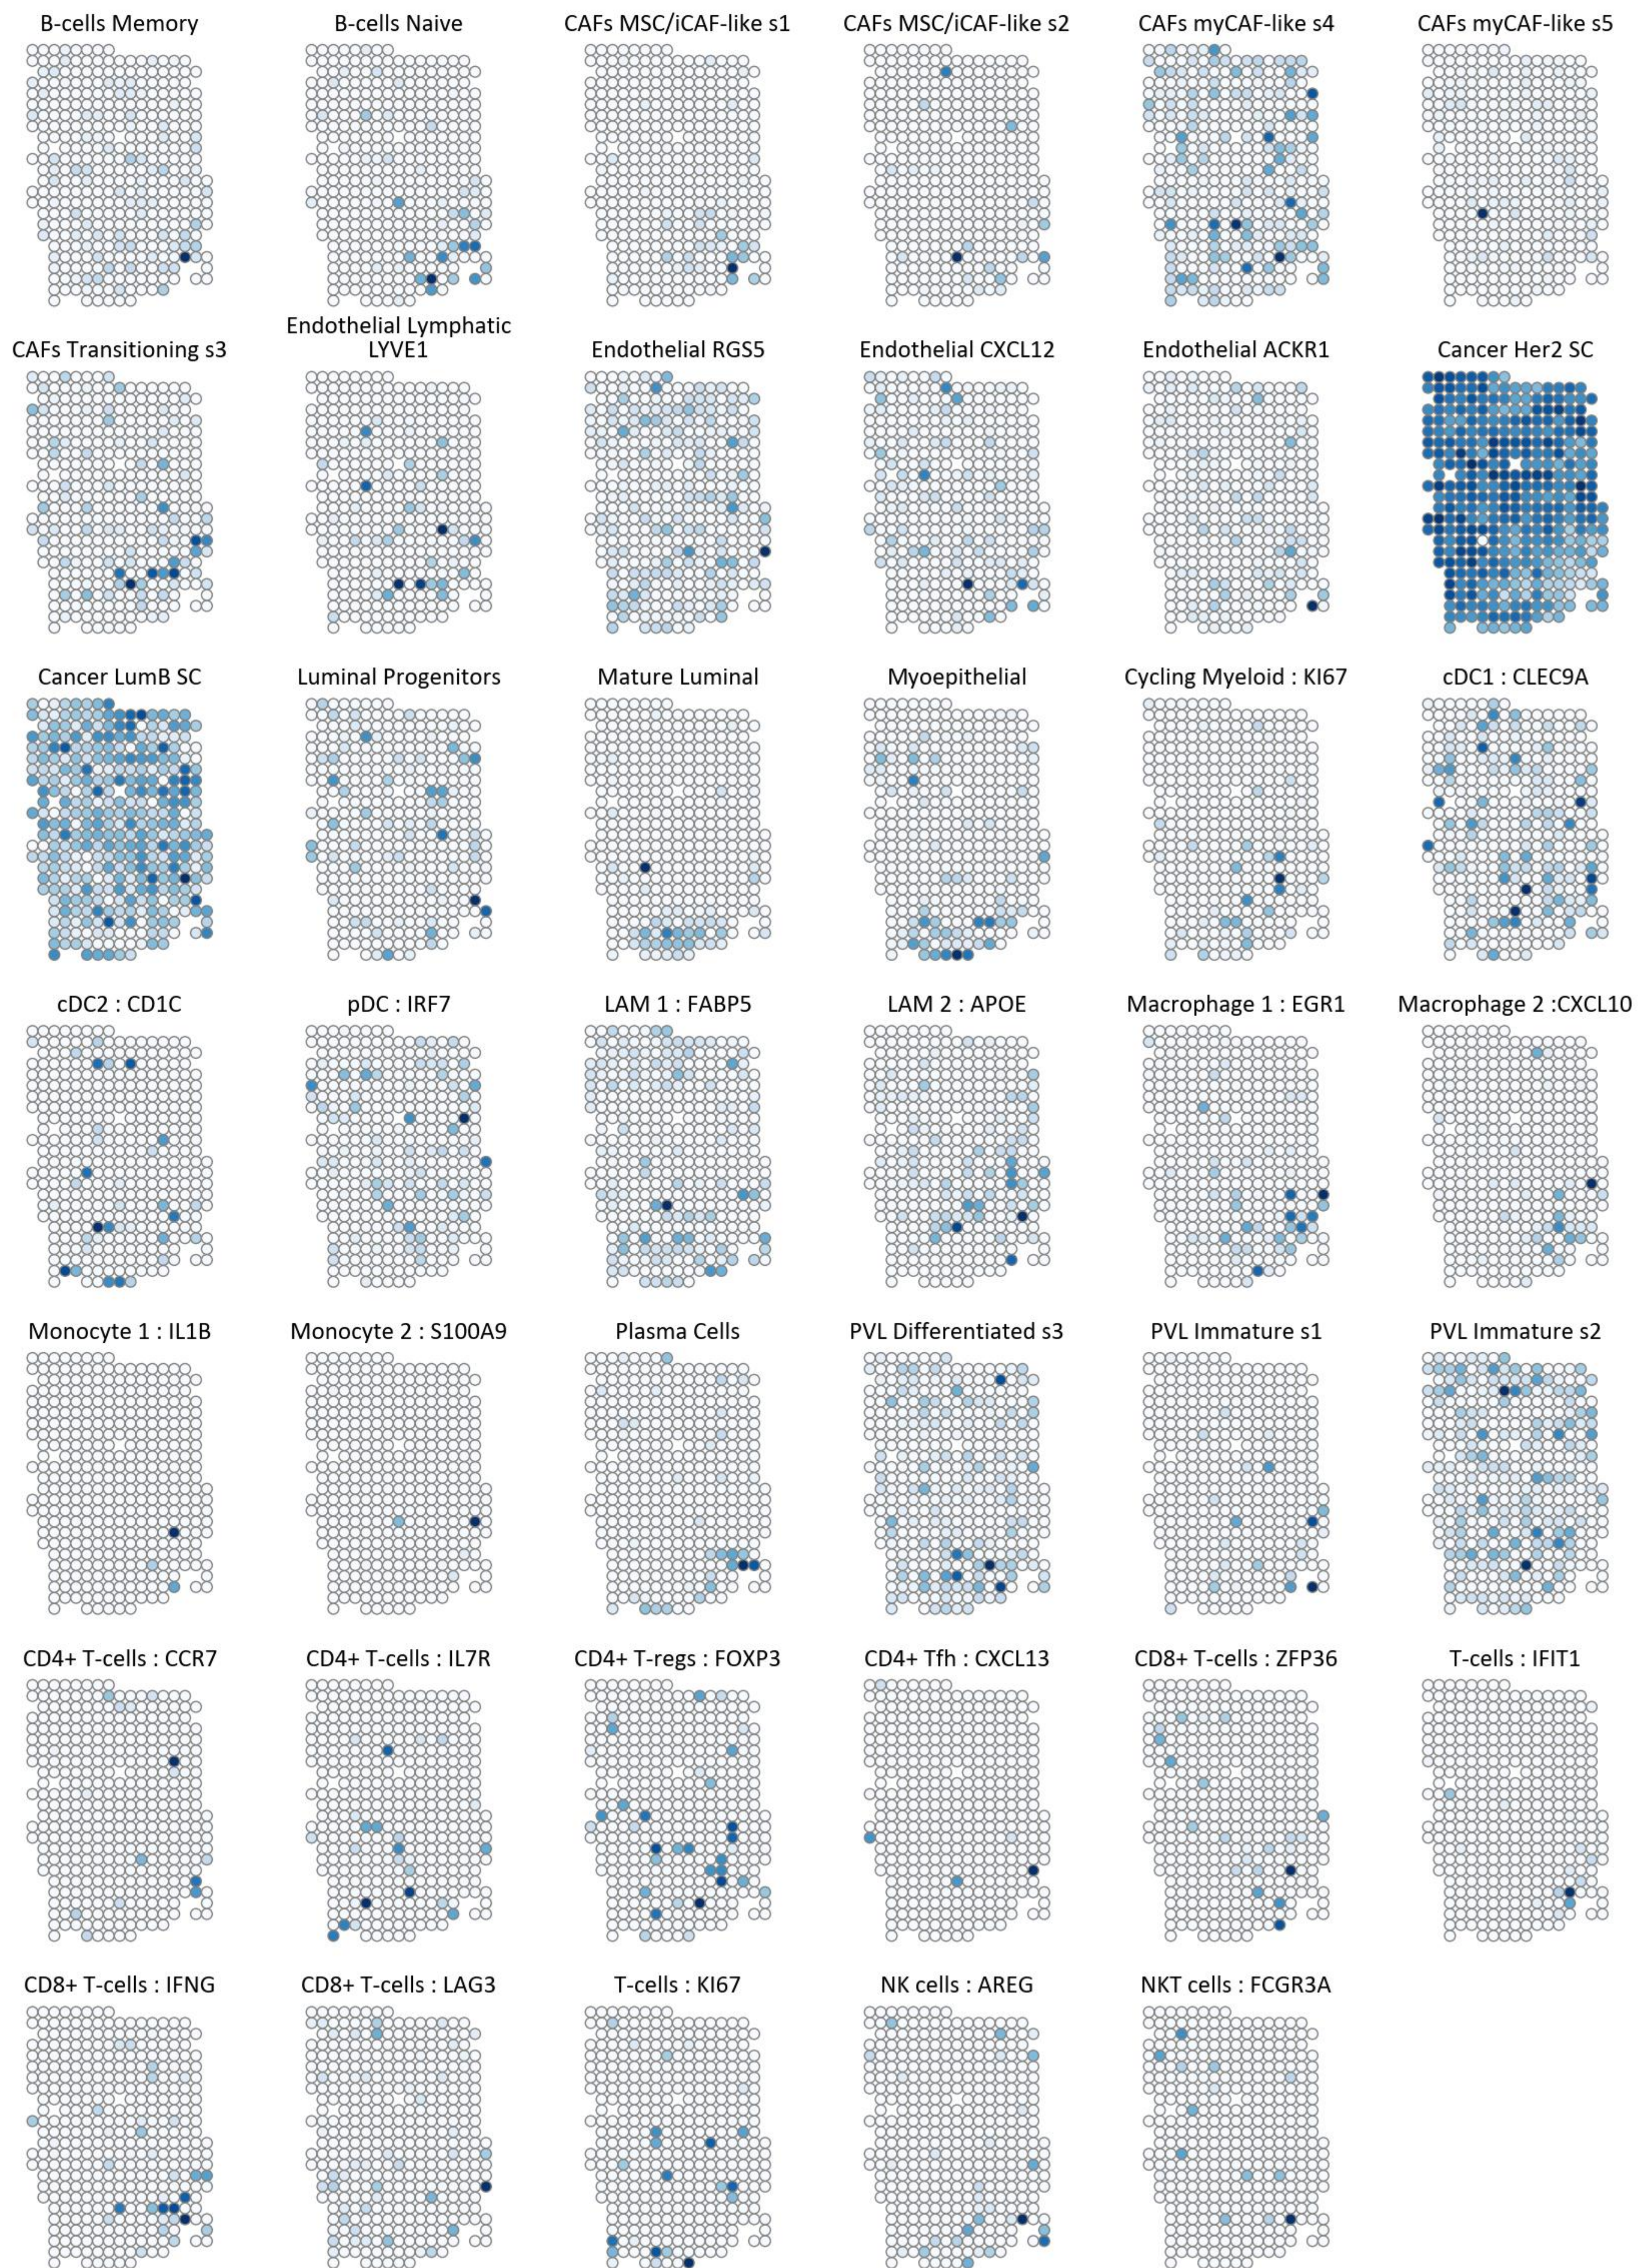

# subset\_D1

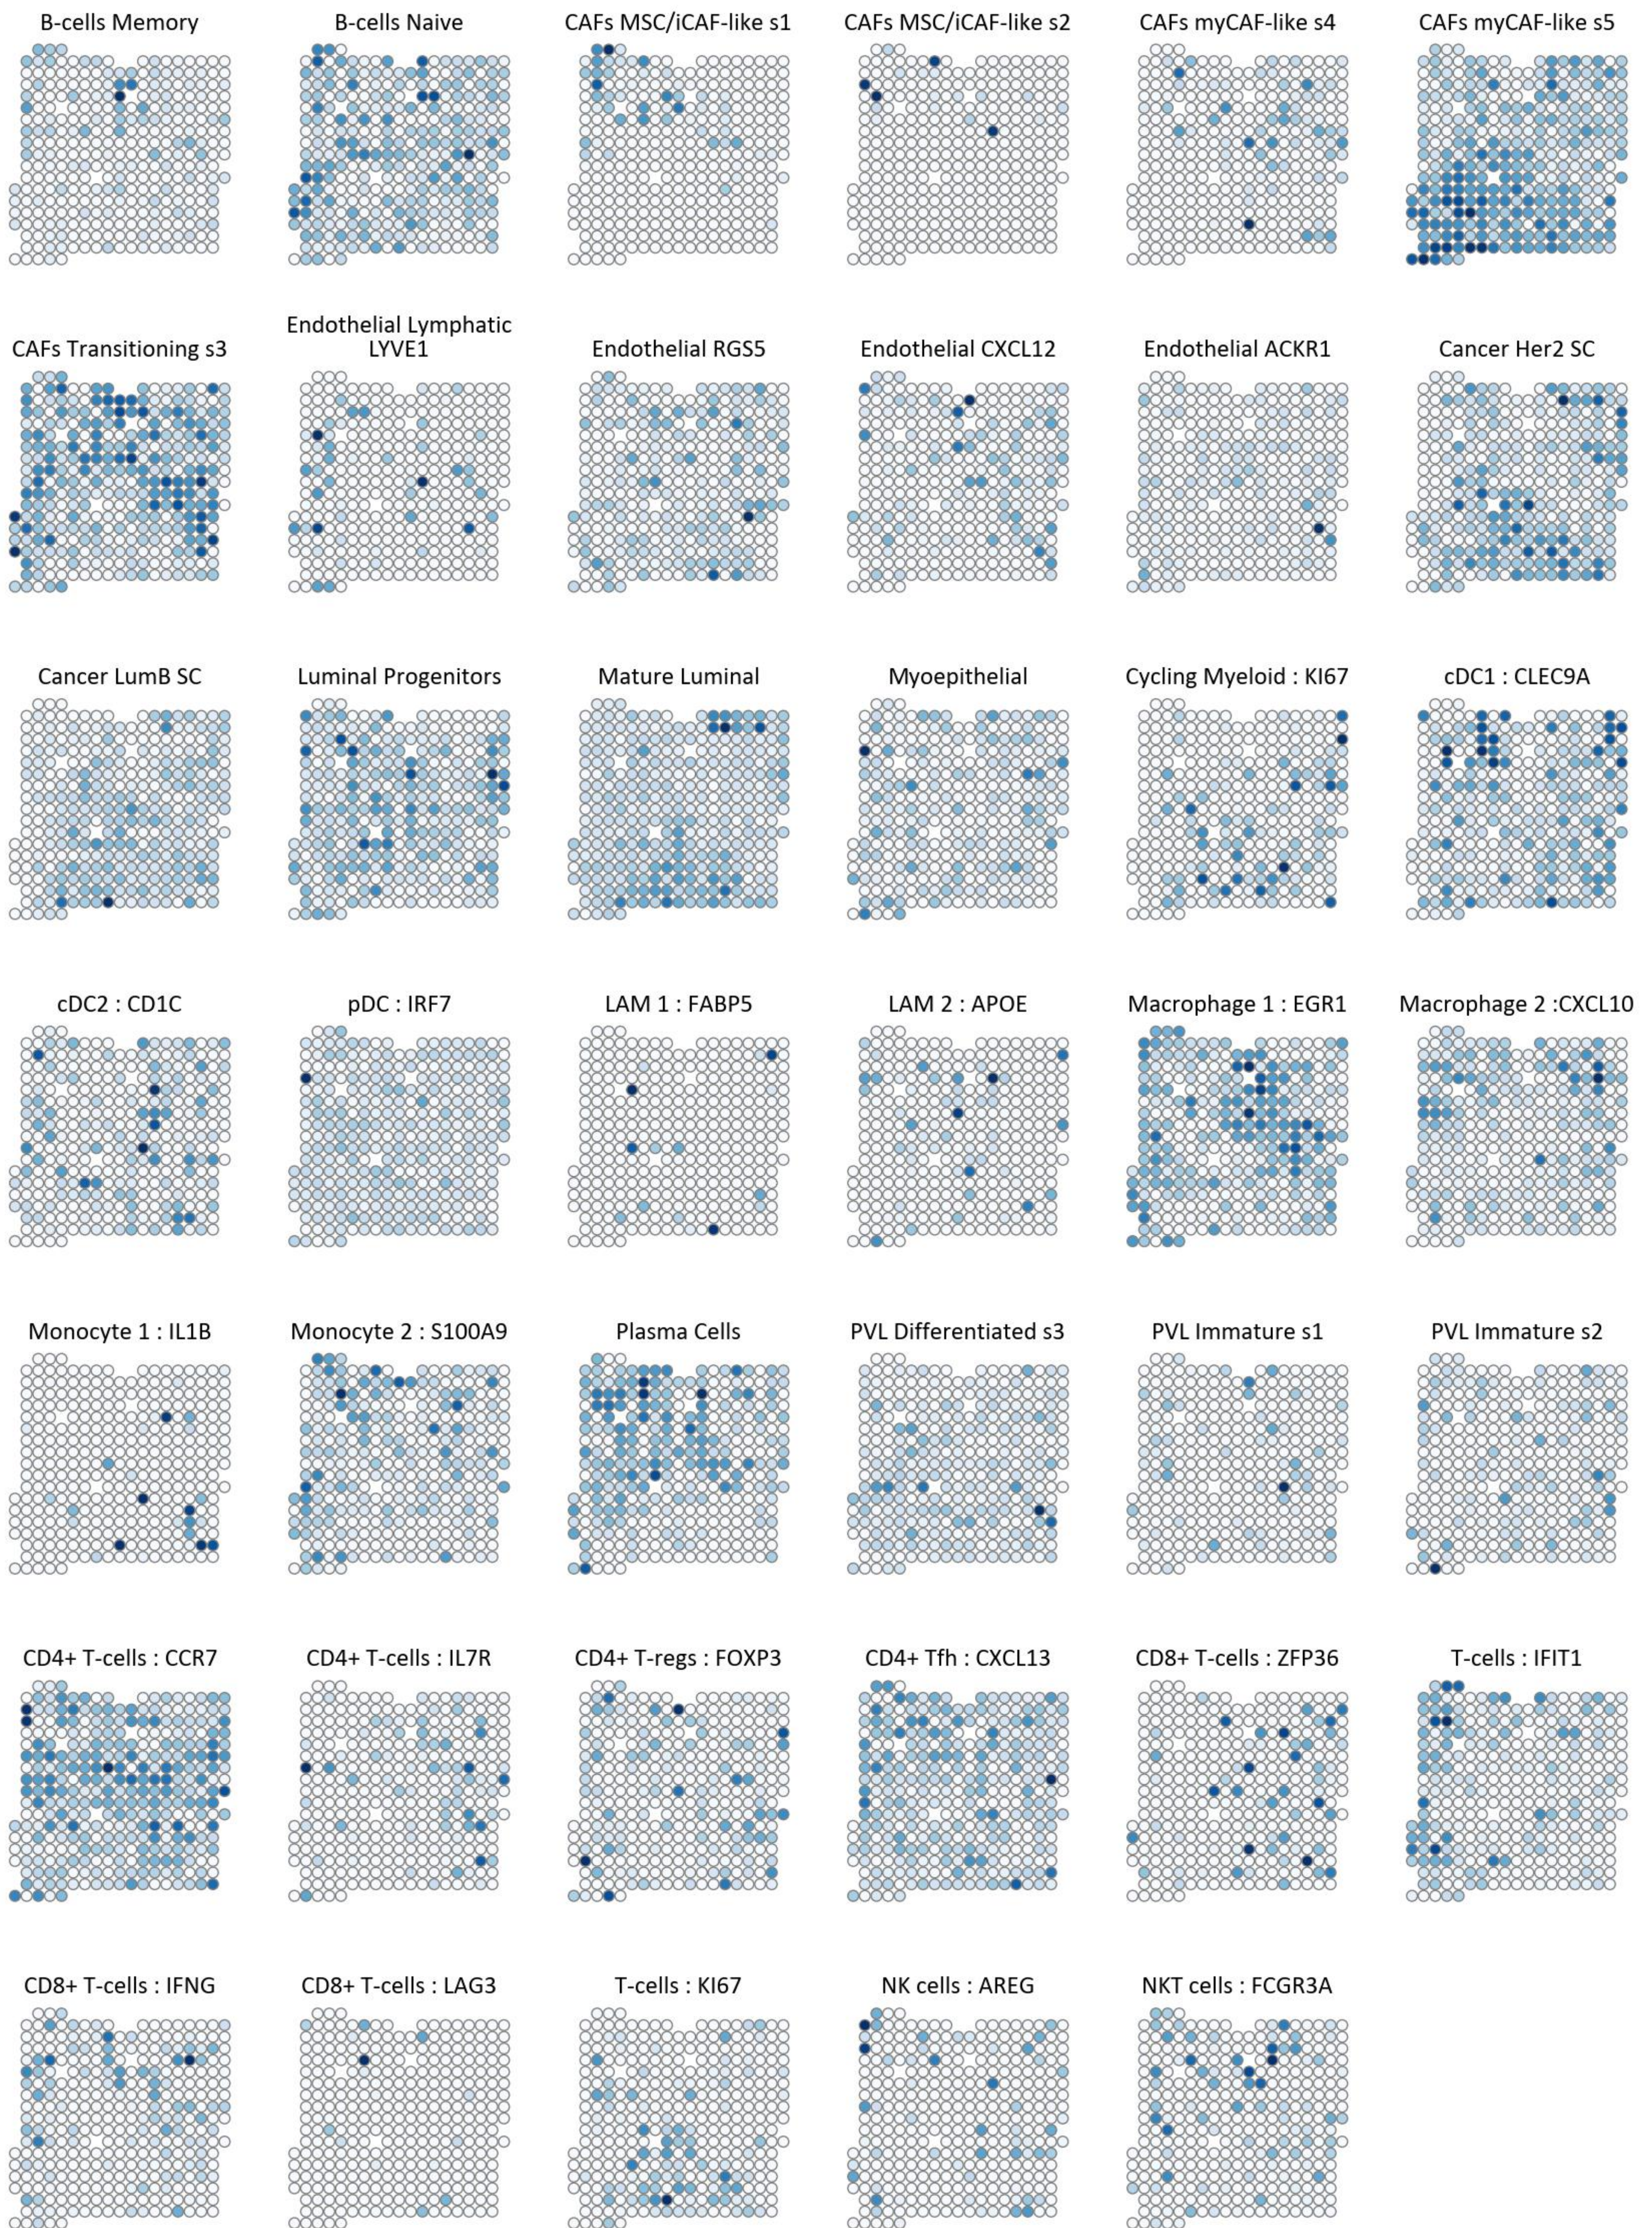

# subset\_C1

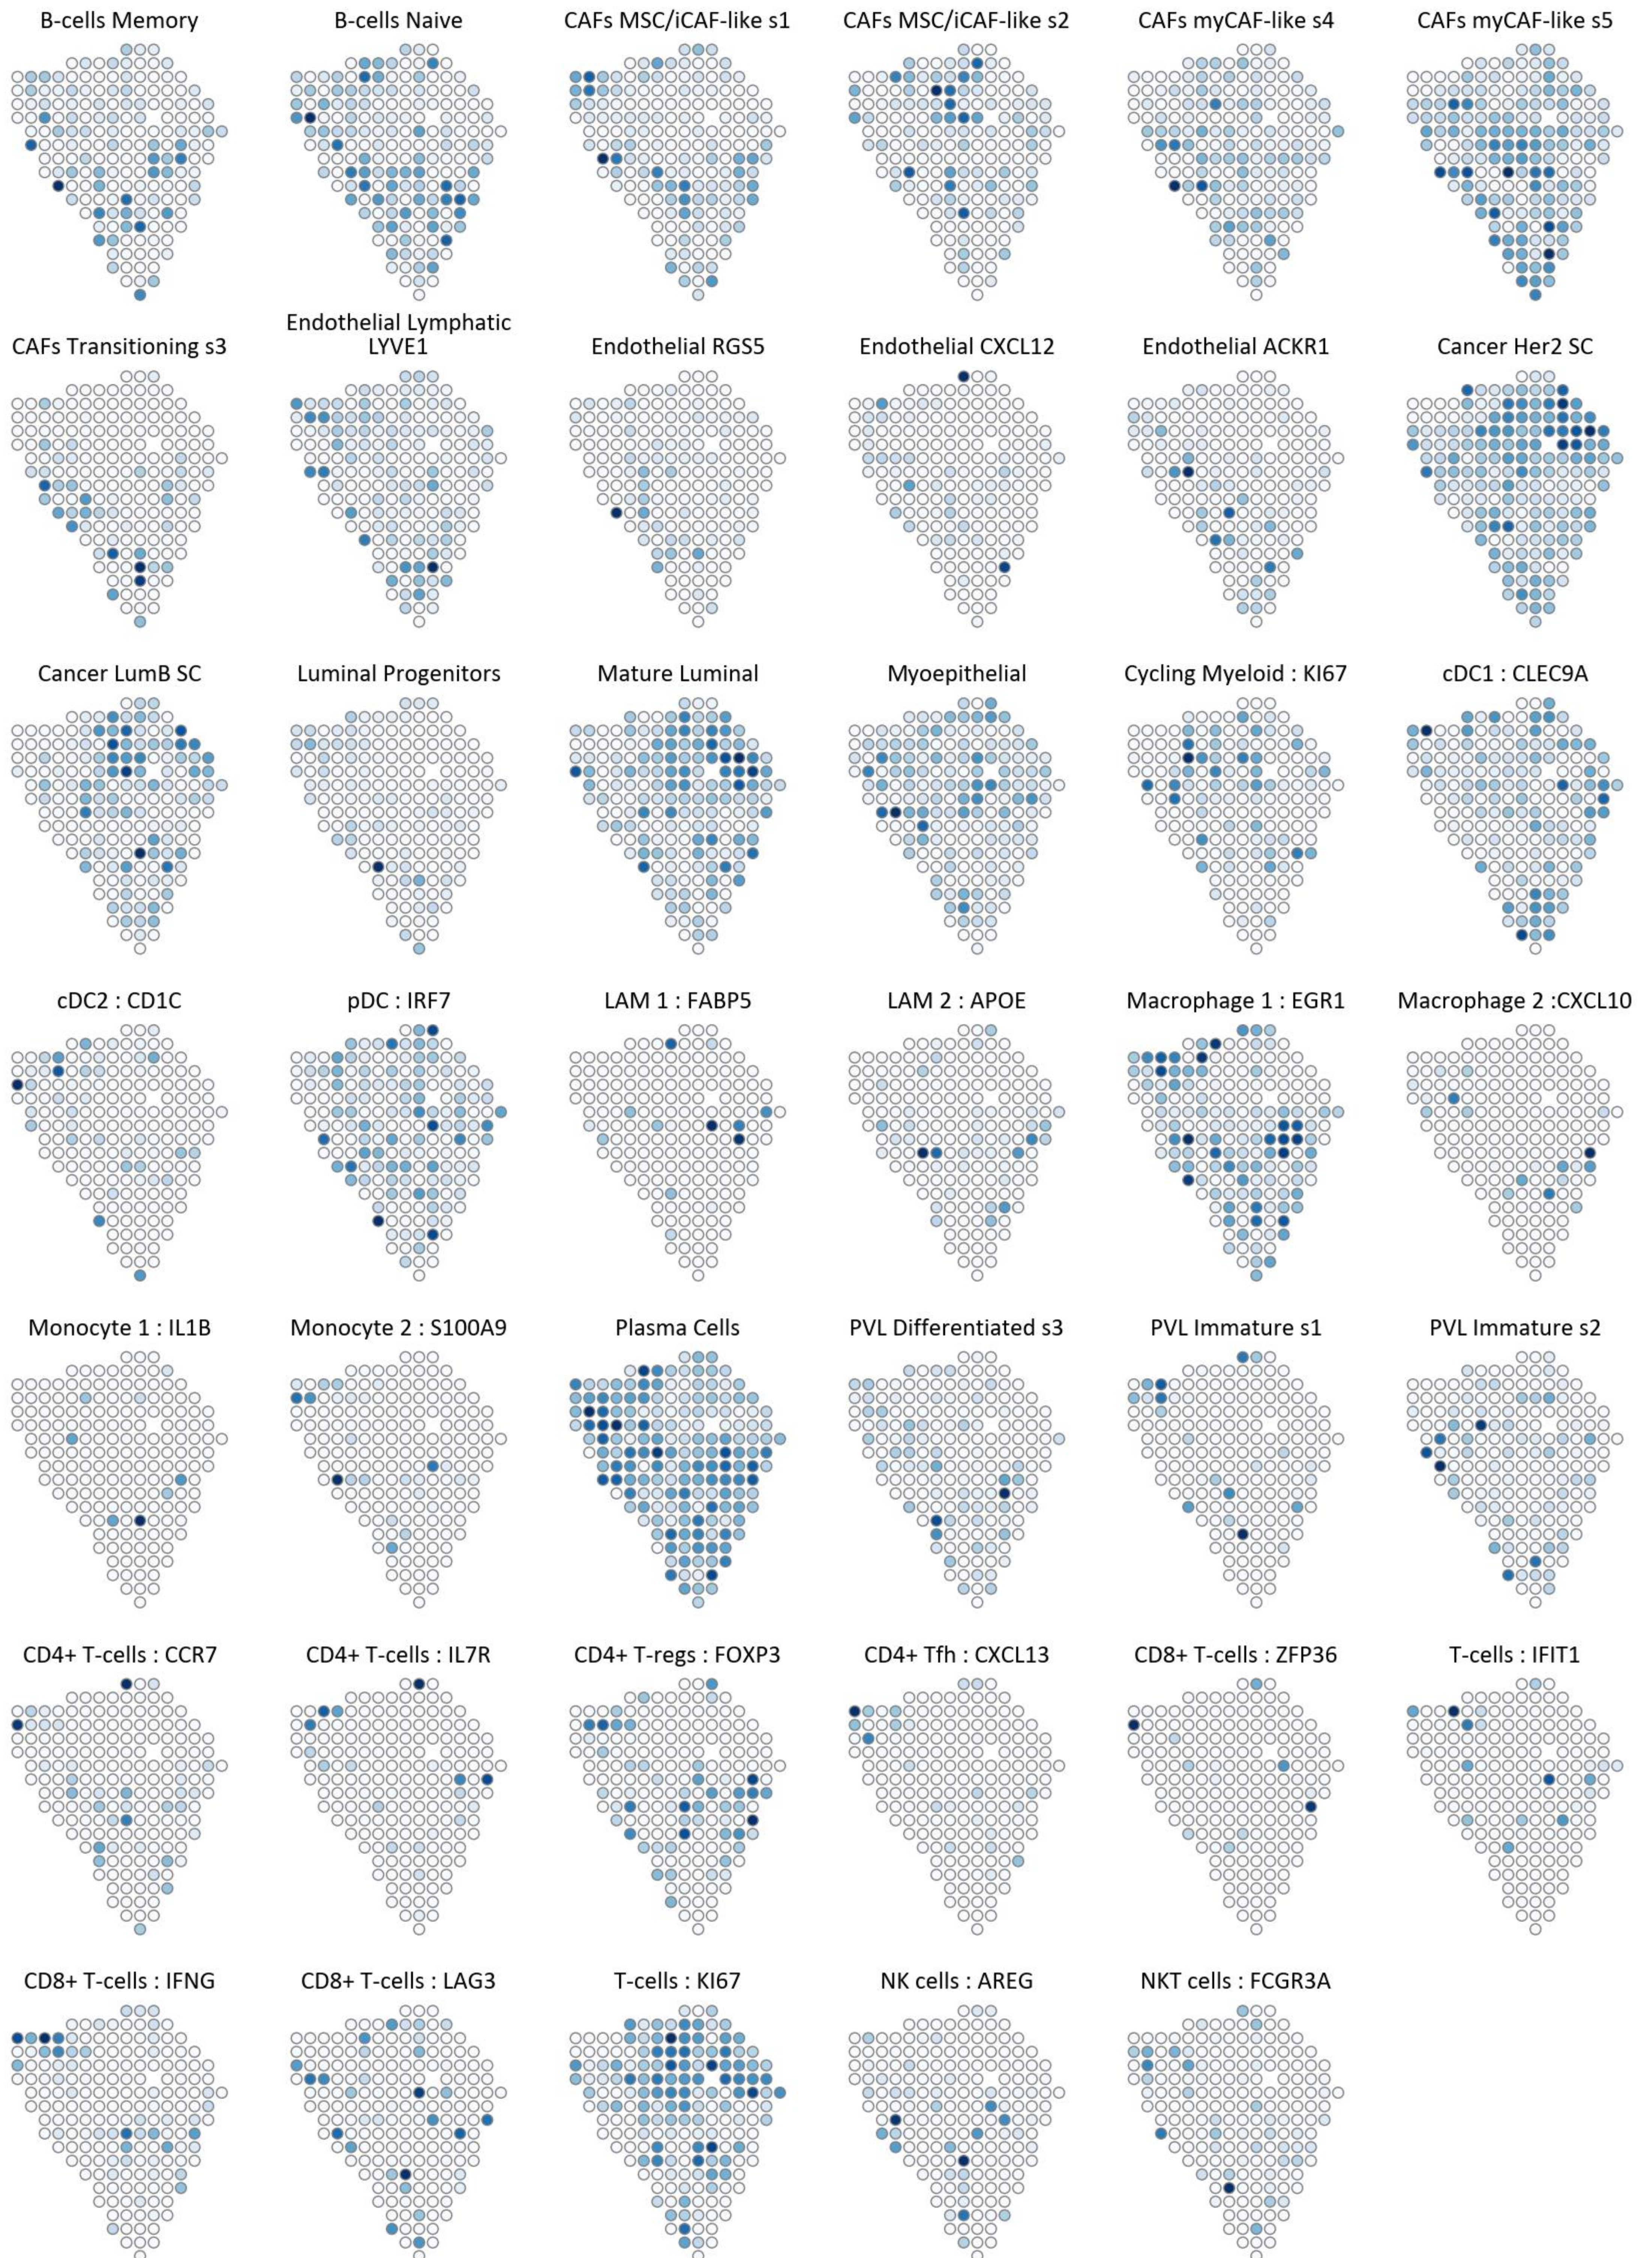

# subset\_D6

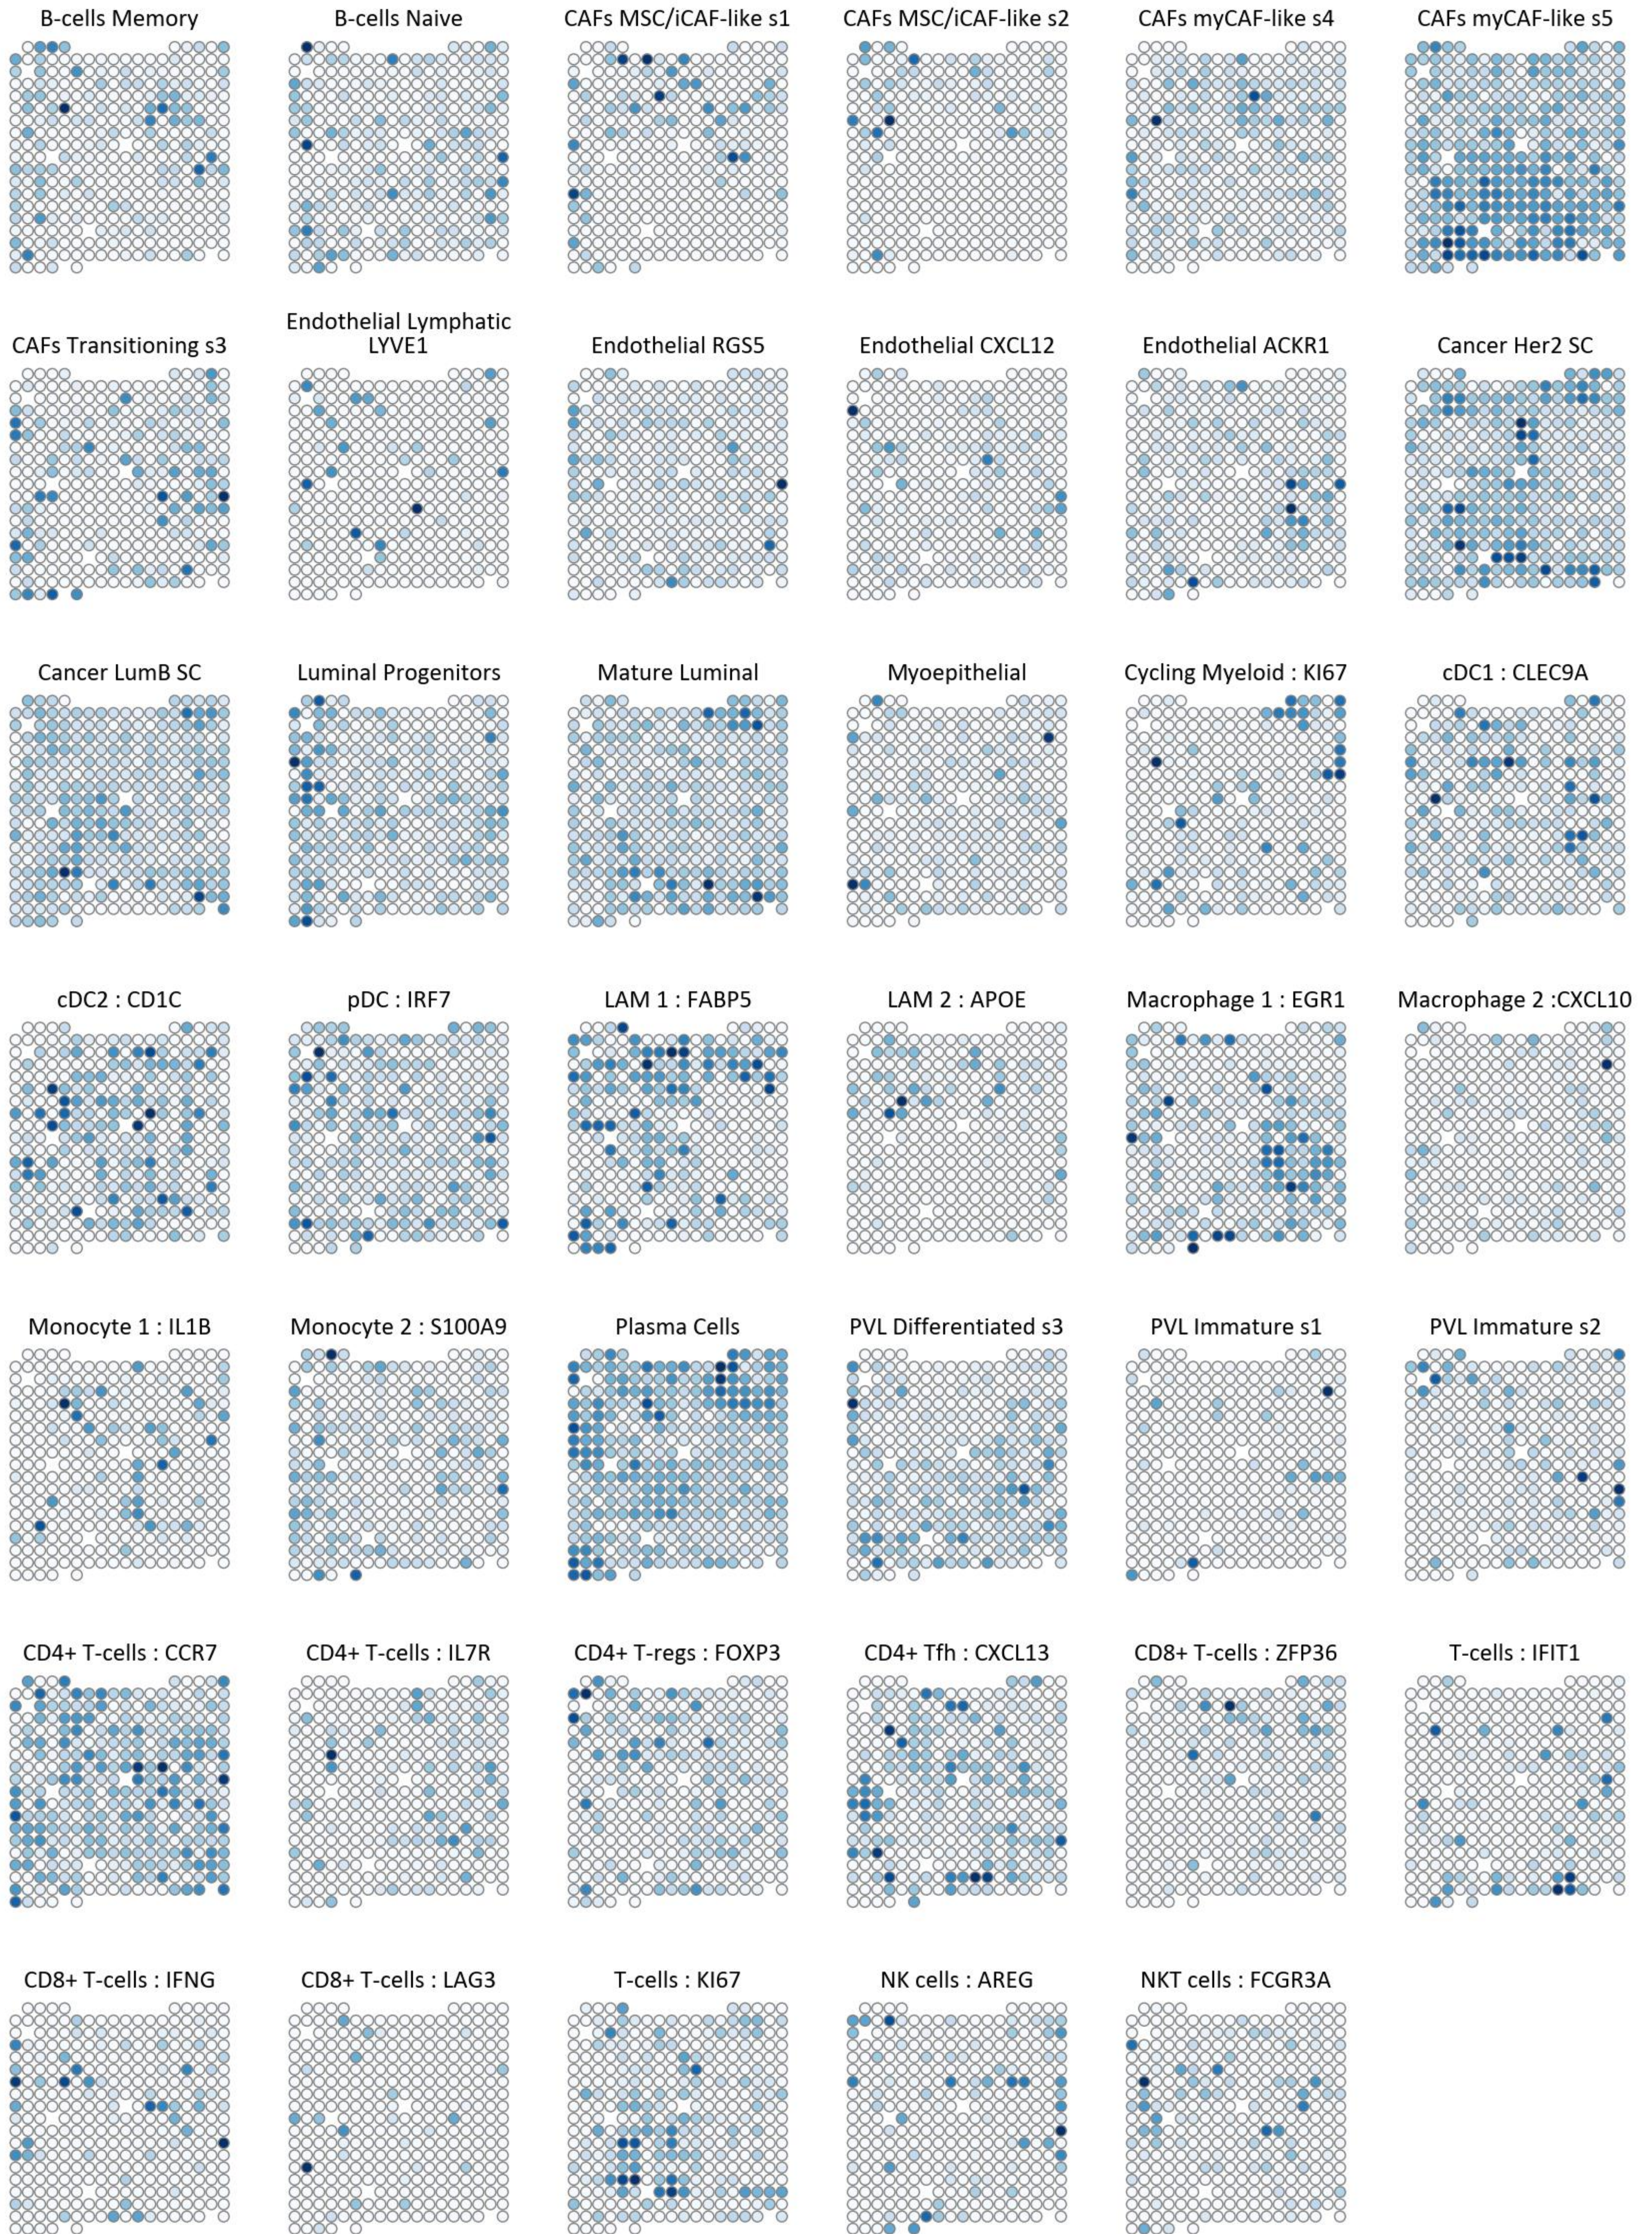

# subset\_A5

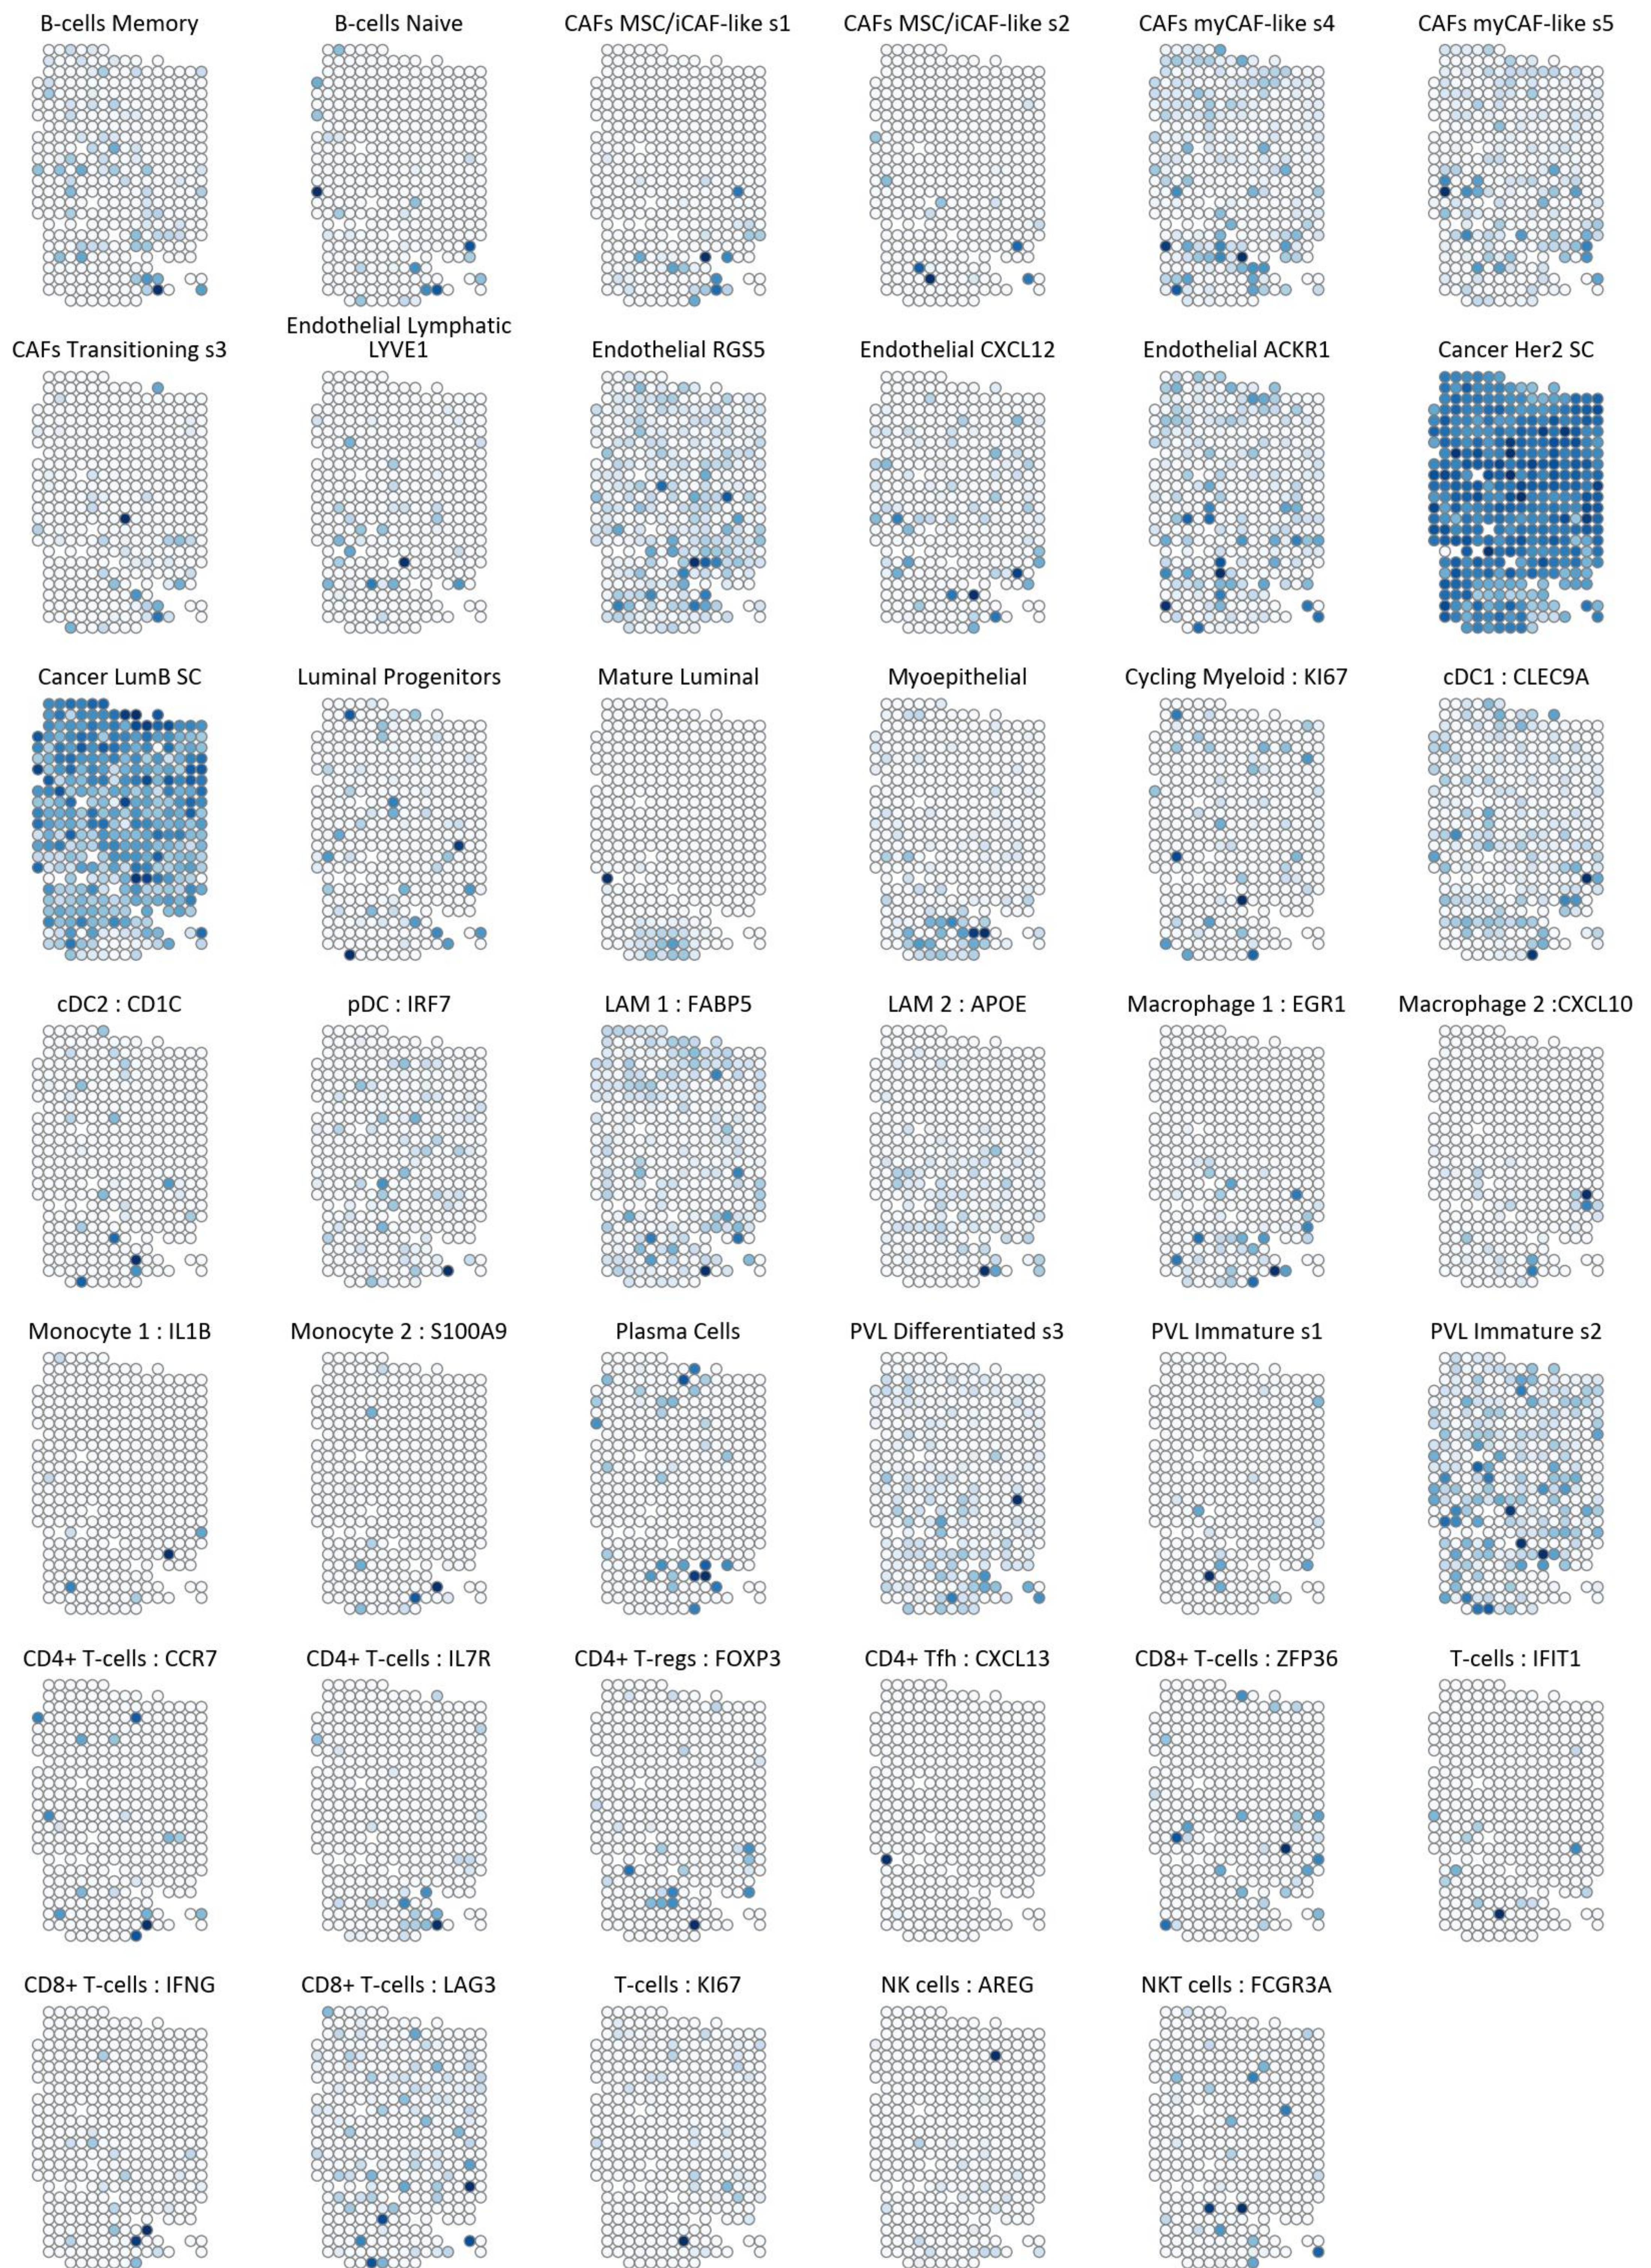

# subset\_H2

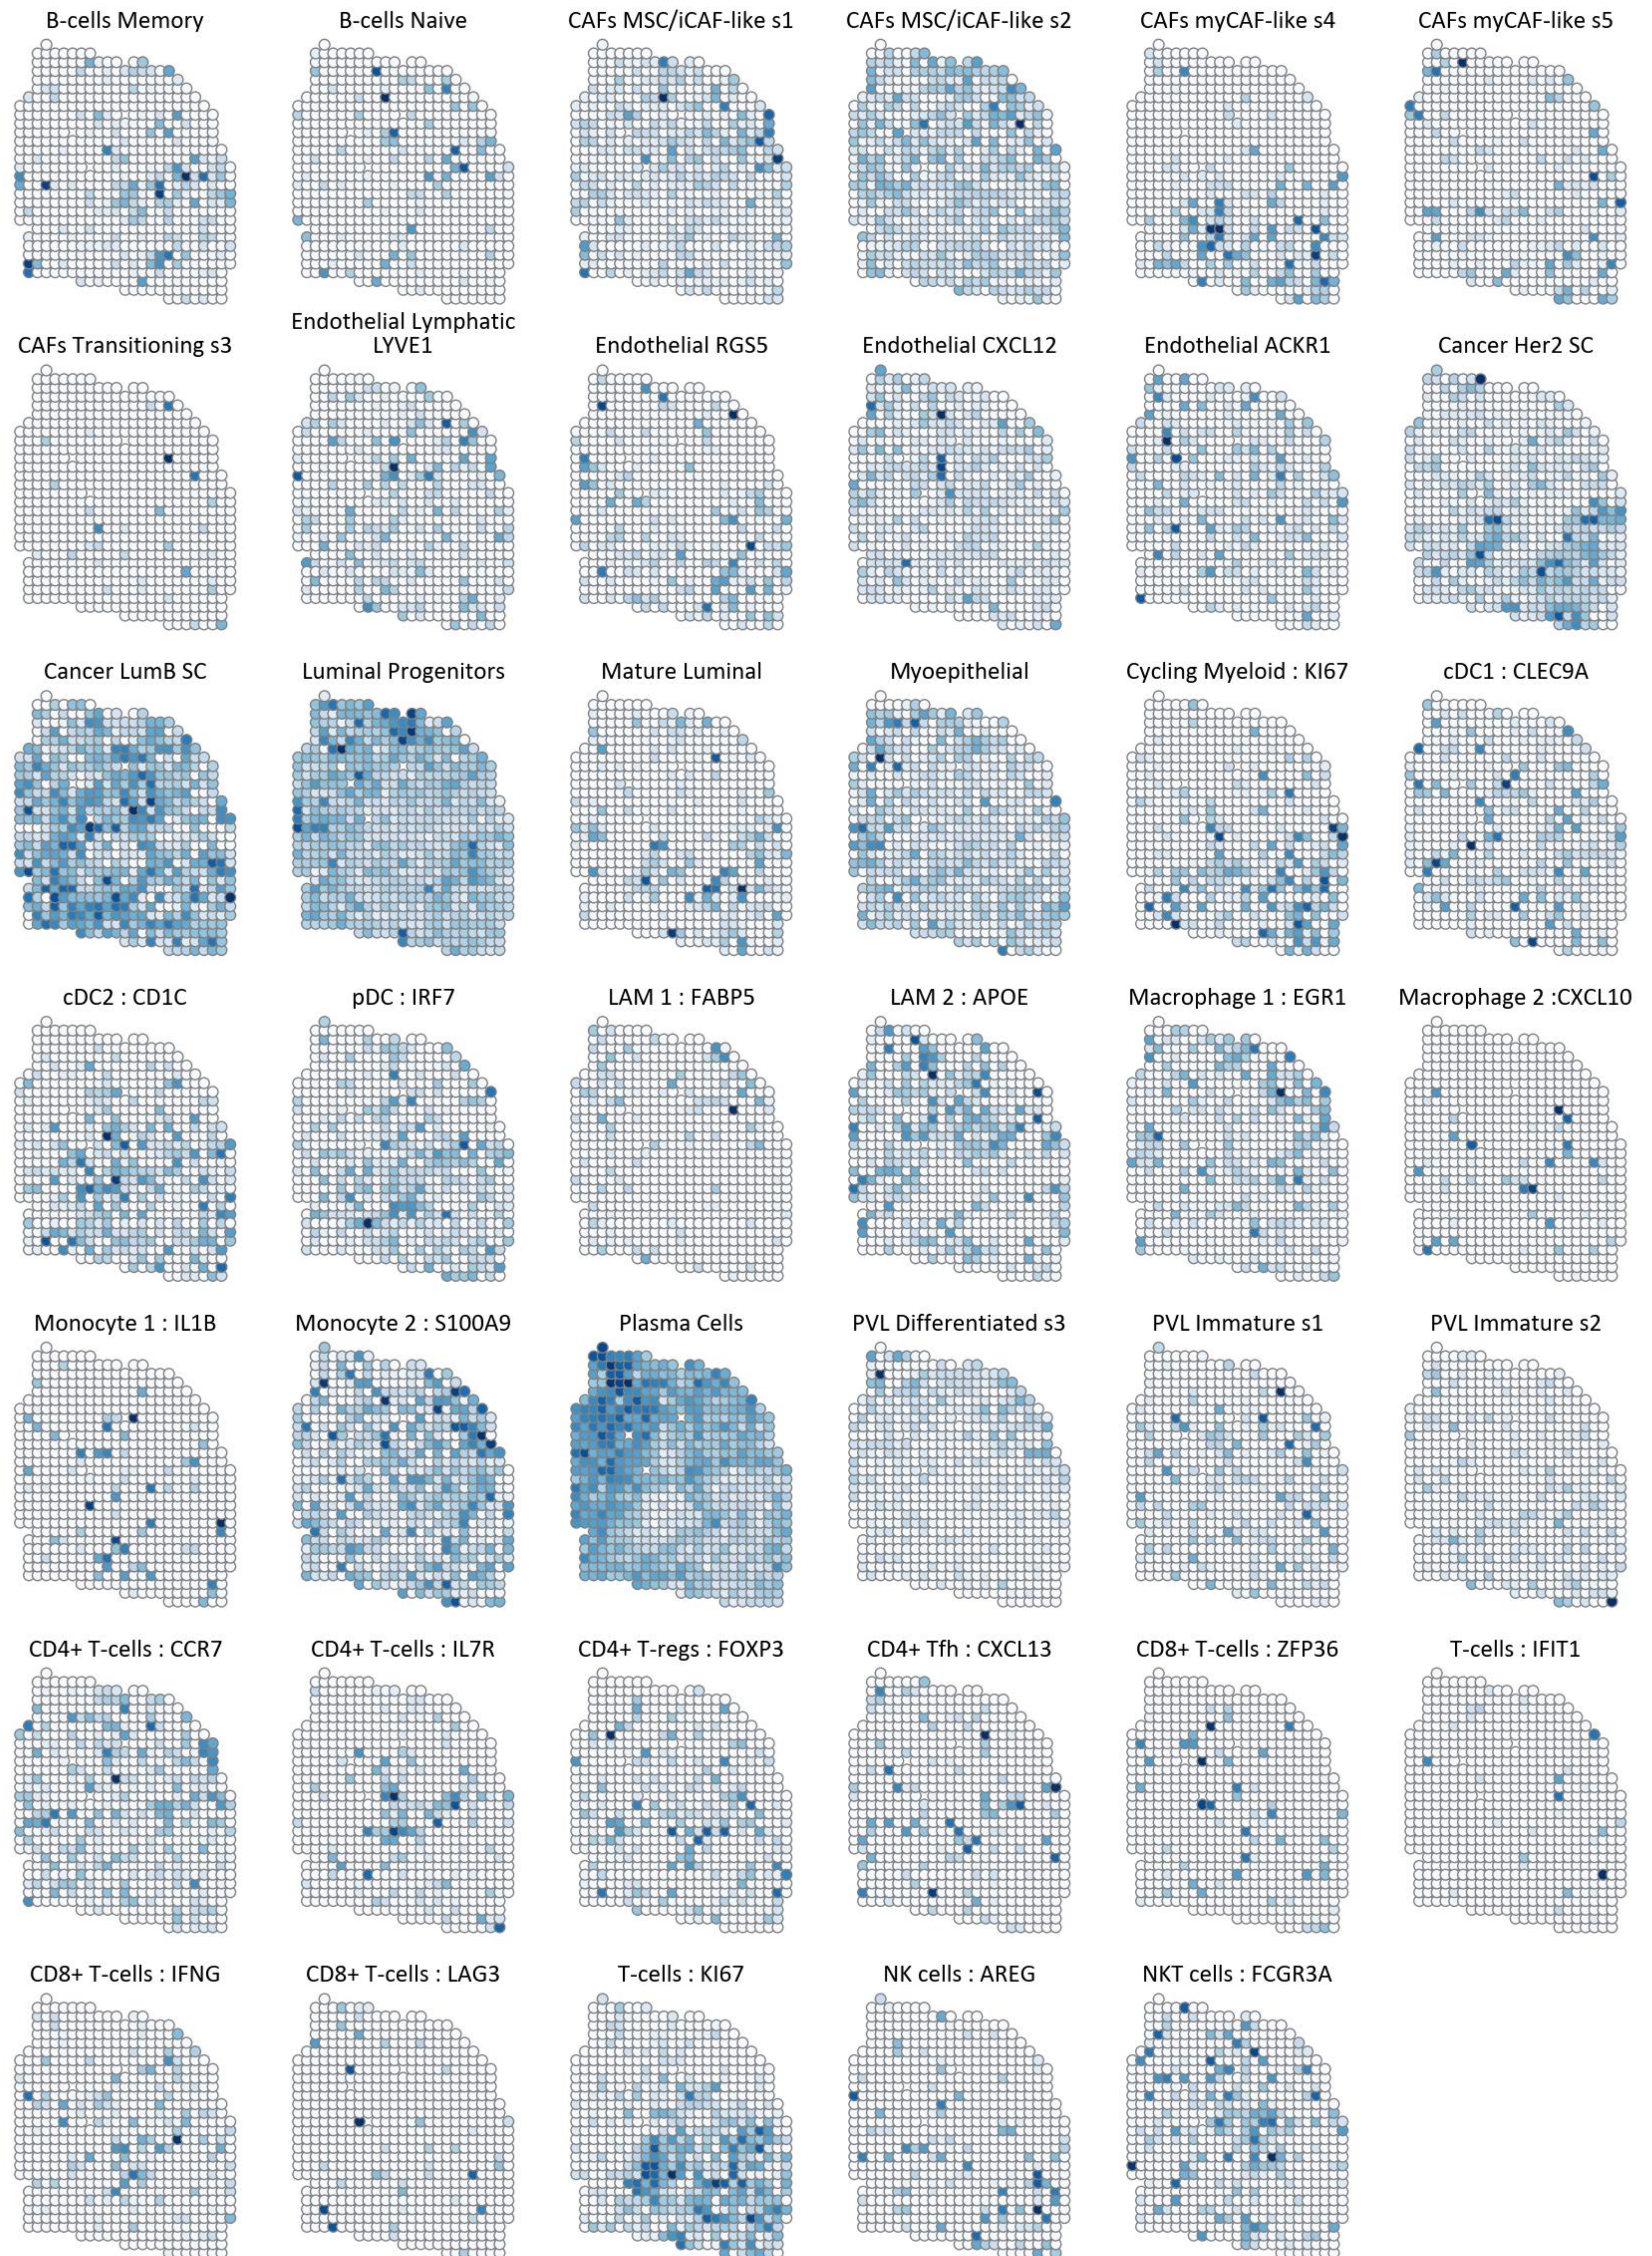

# subset\_D2

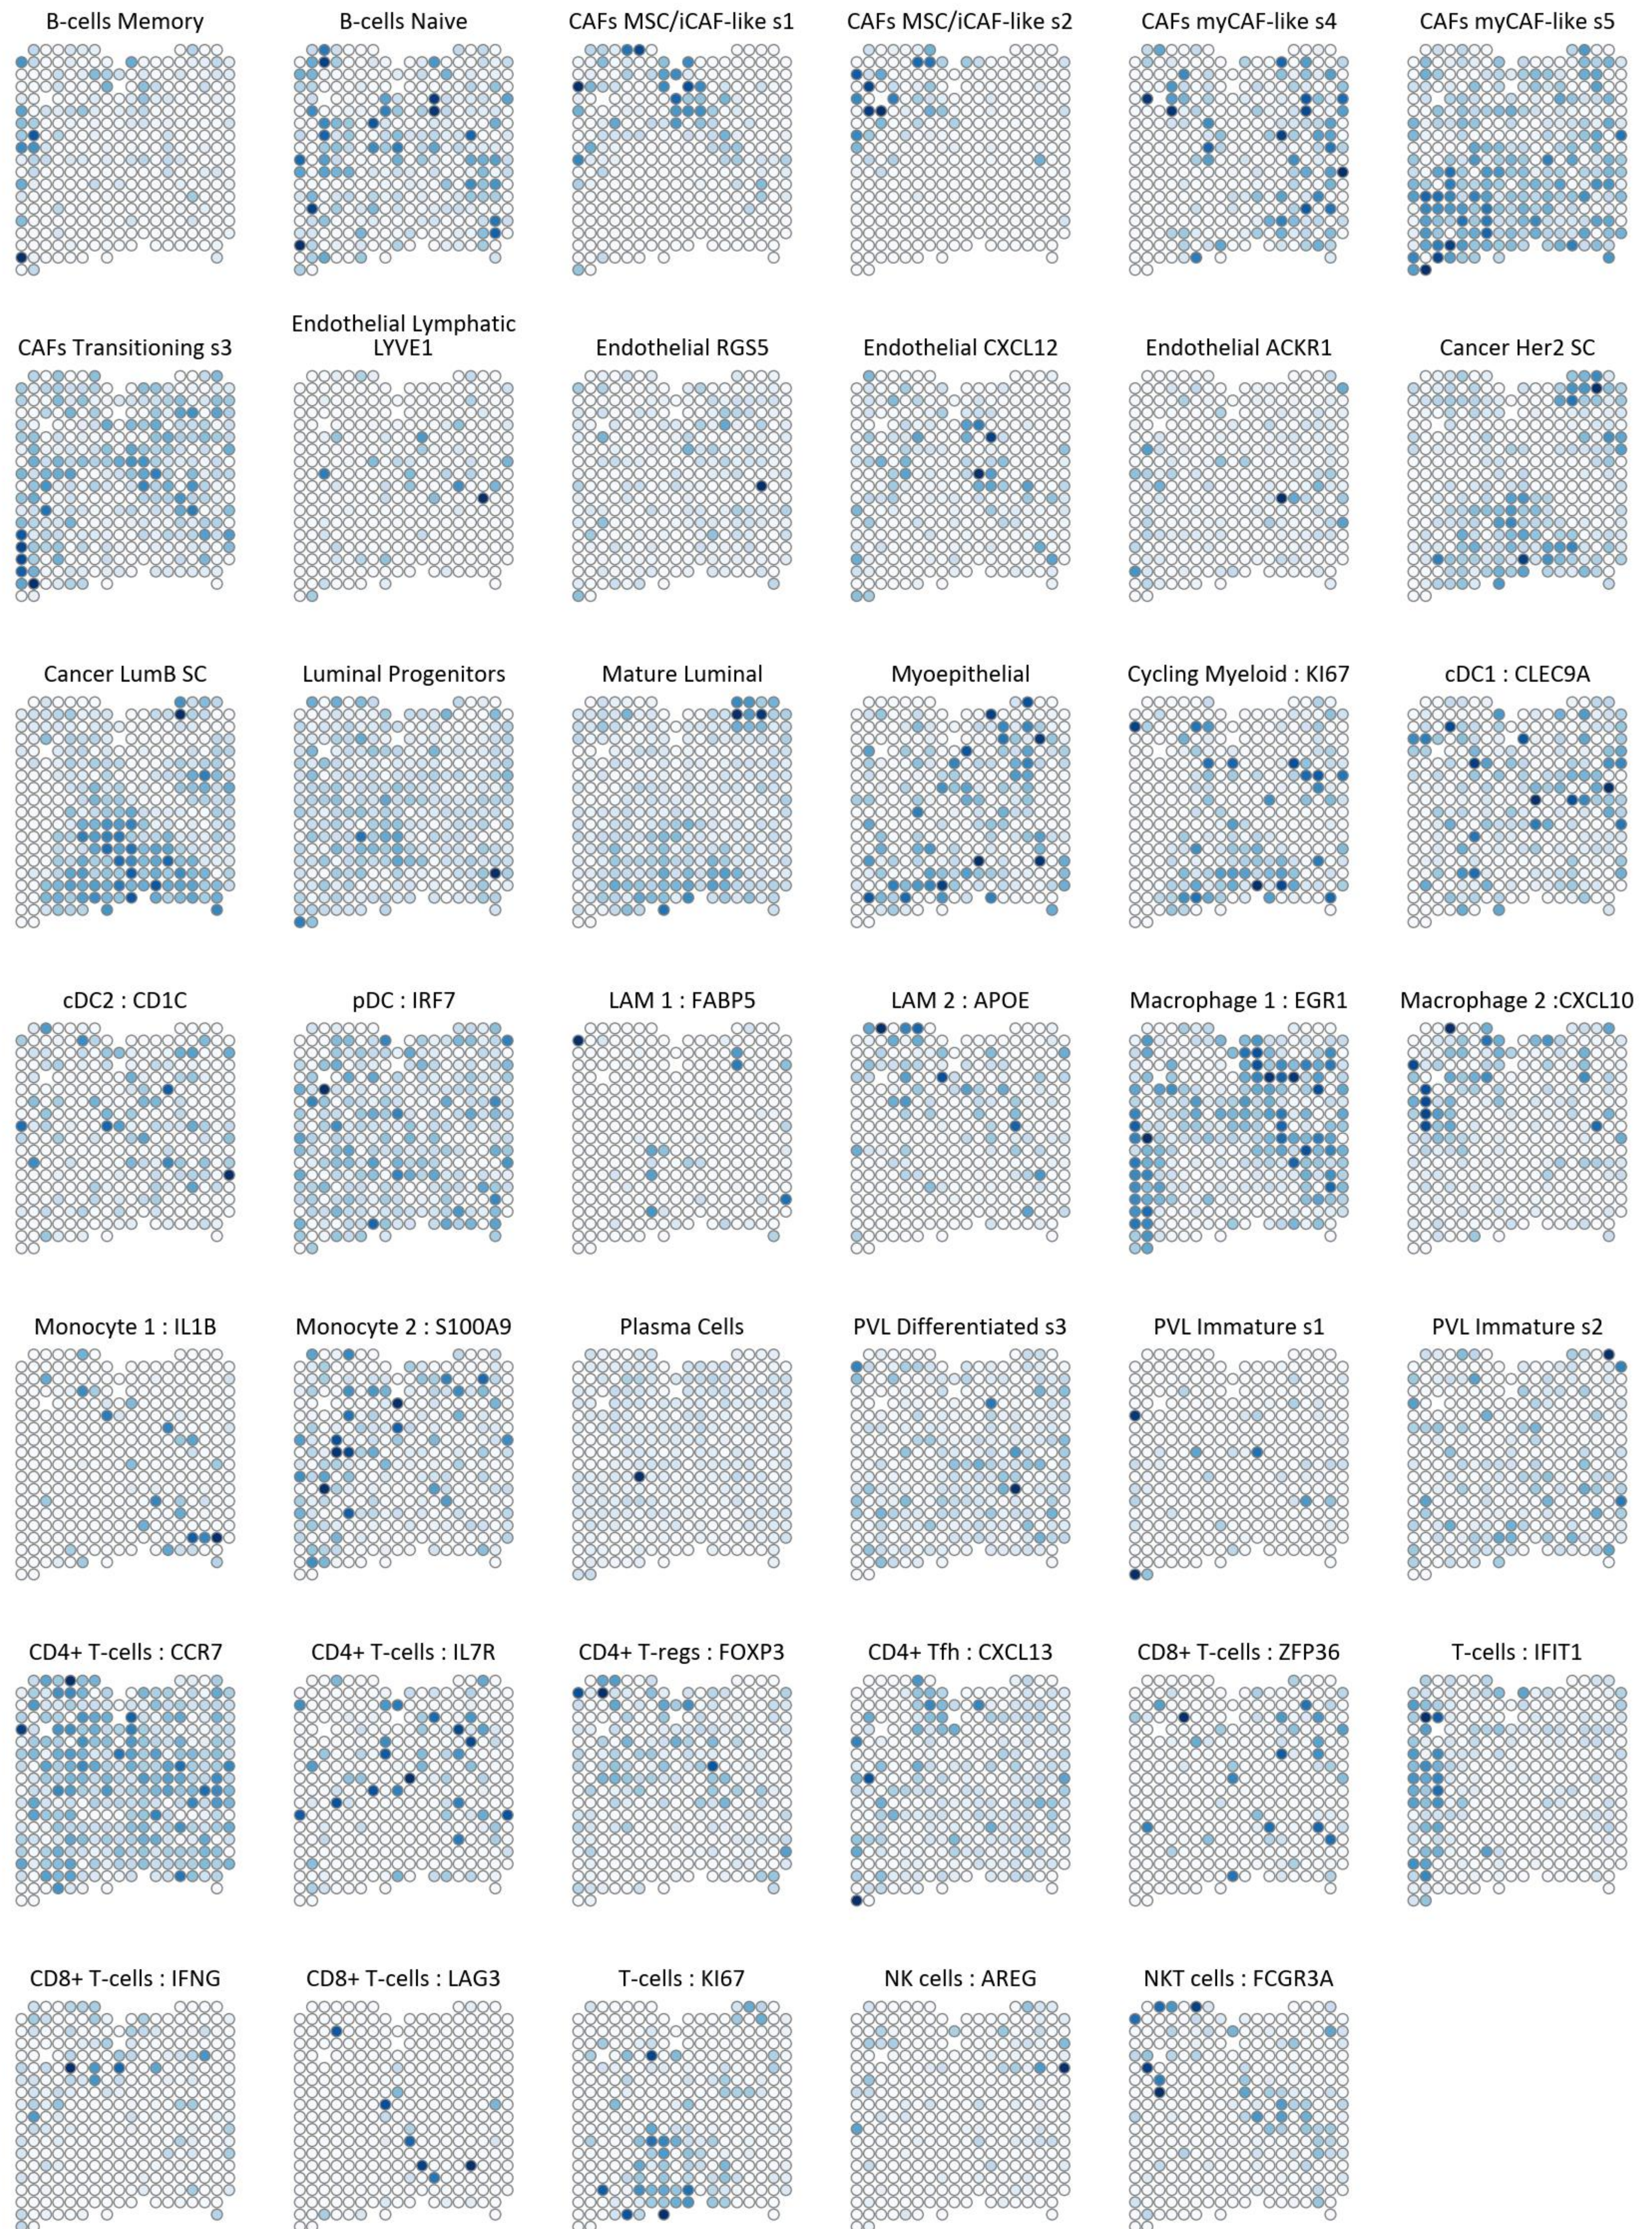



# subset\_H1

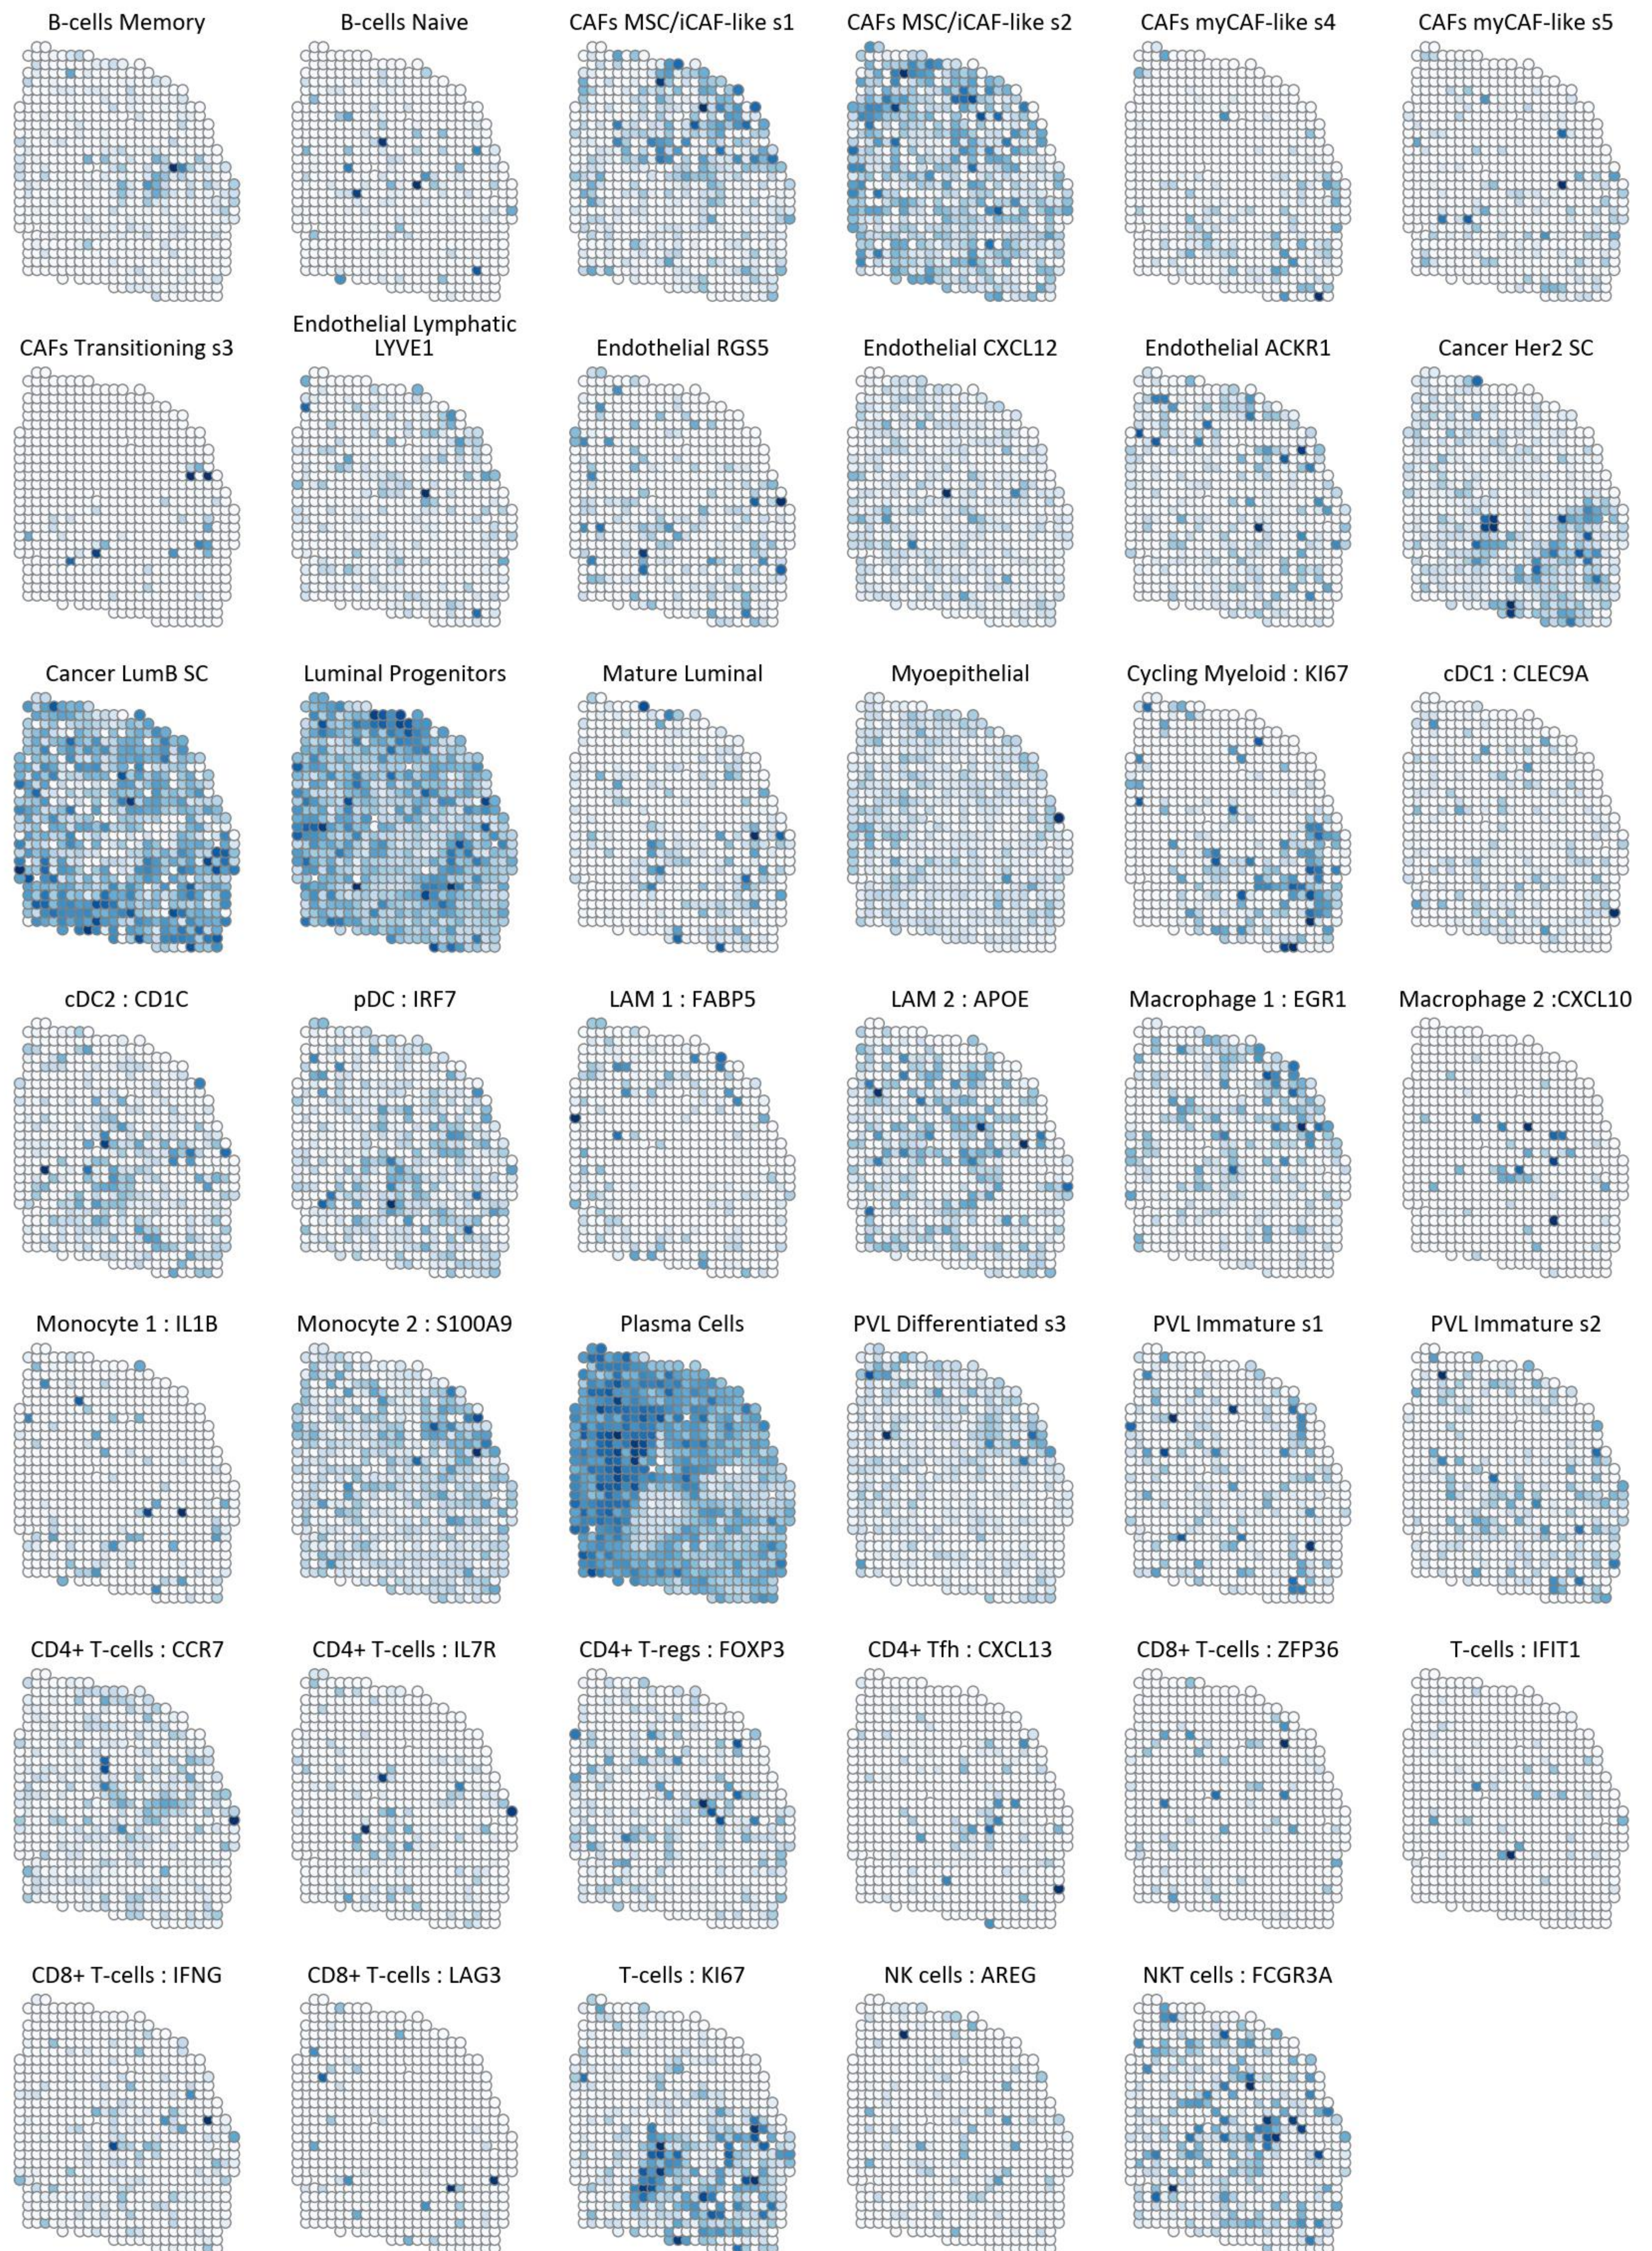

# subset\_F1

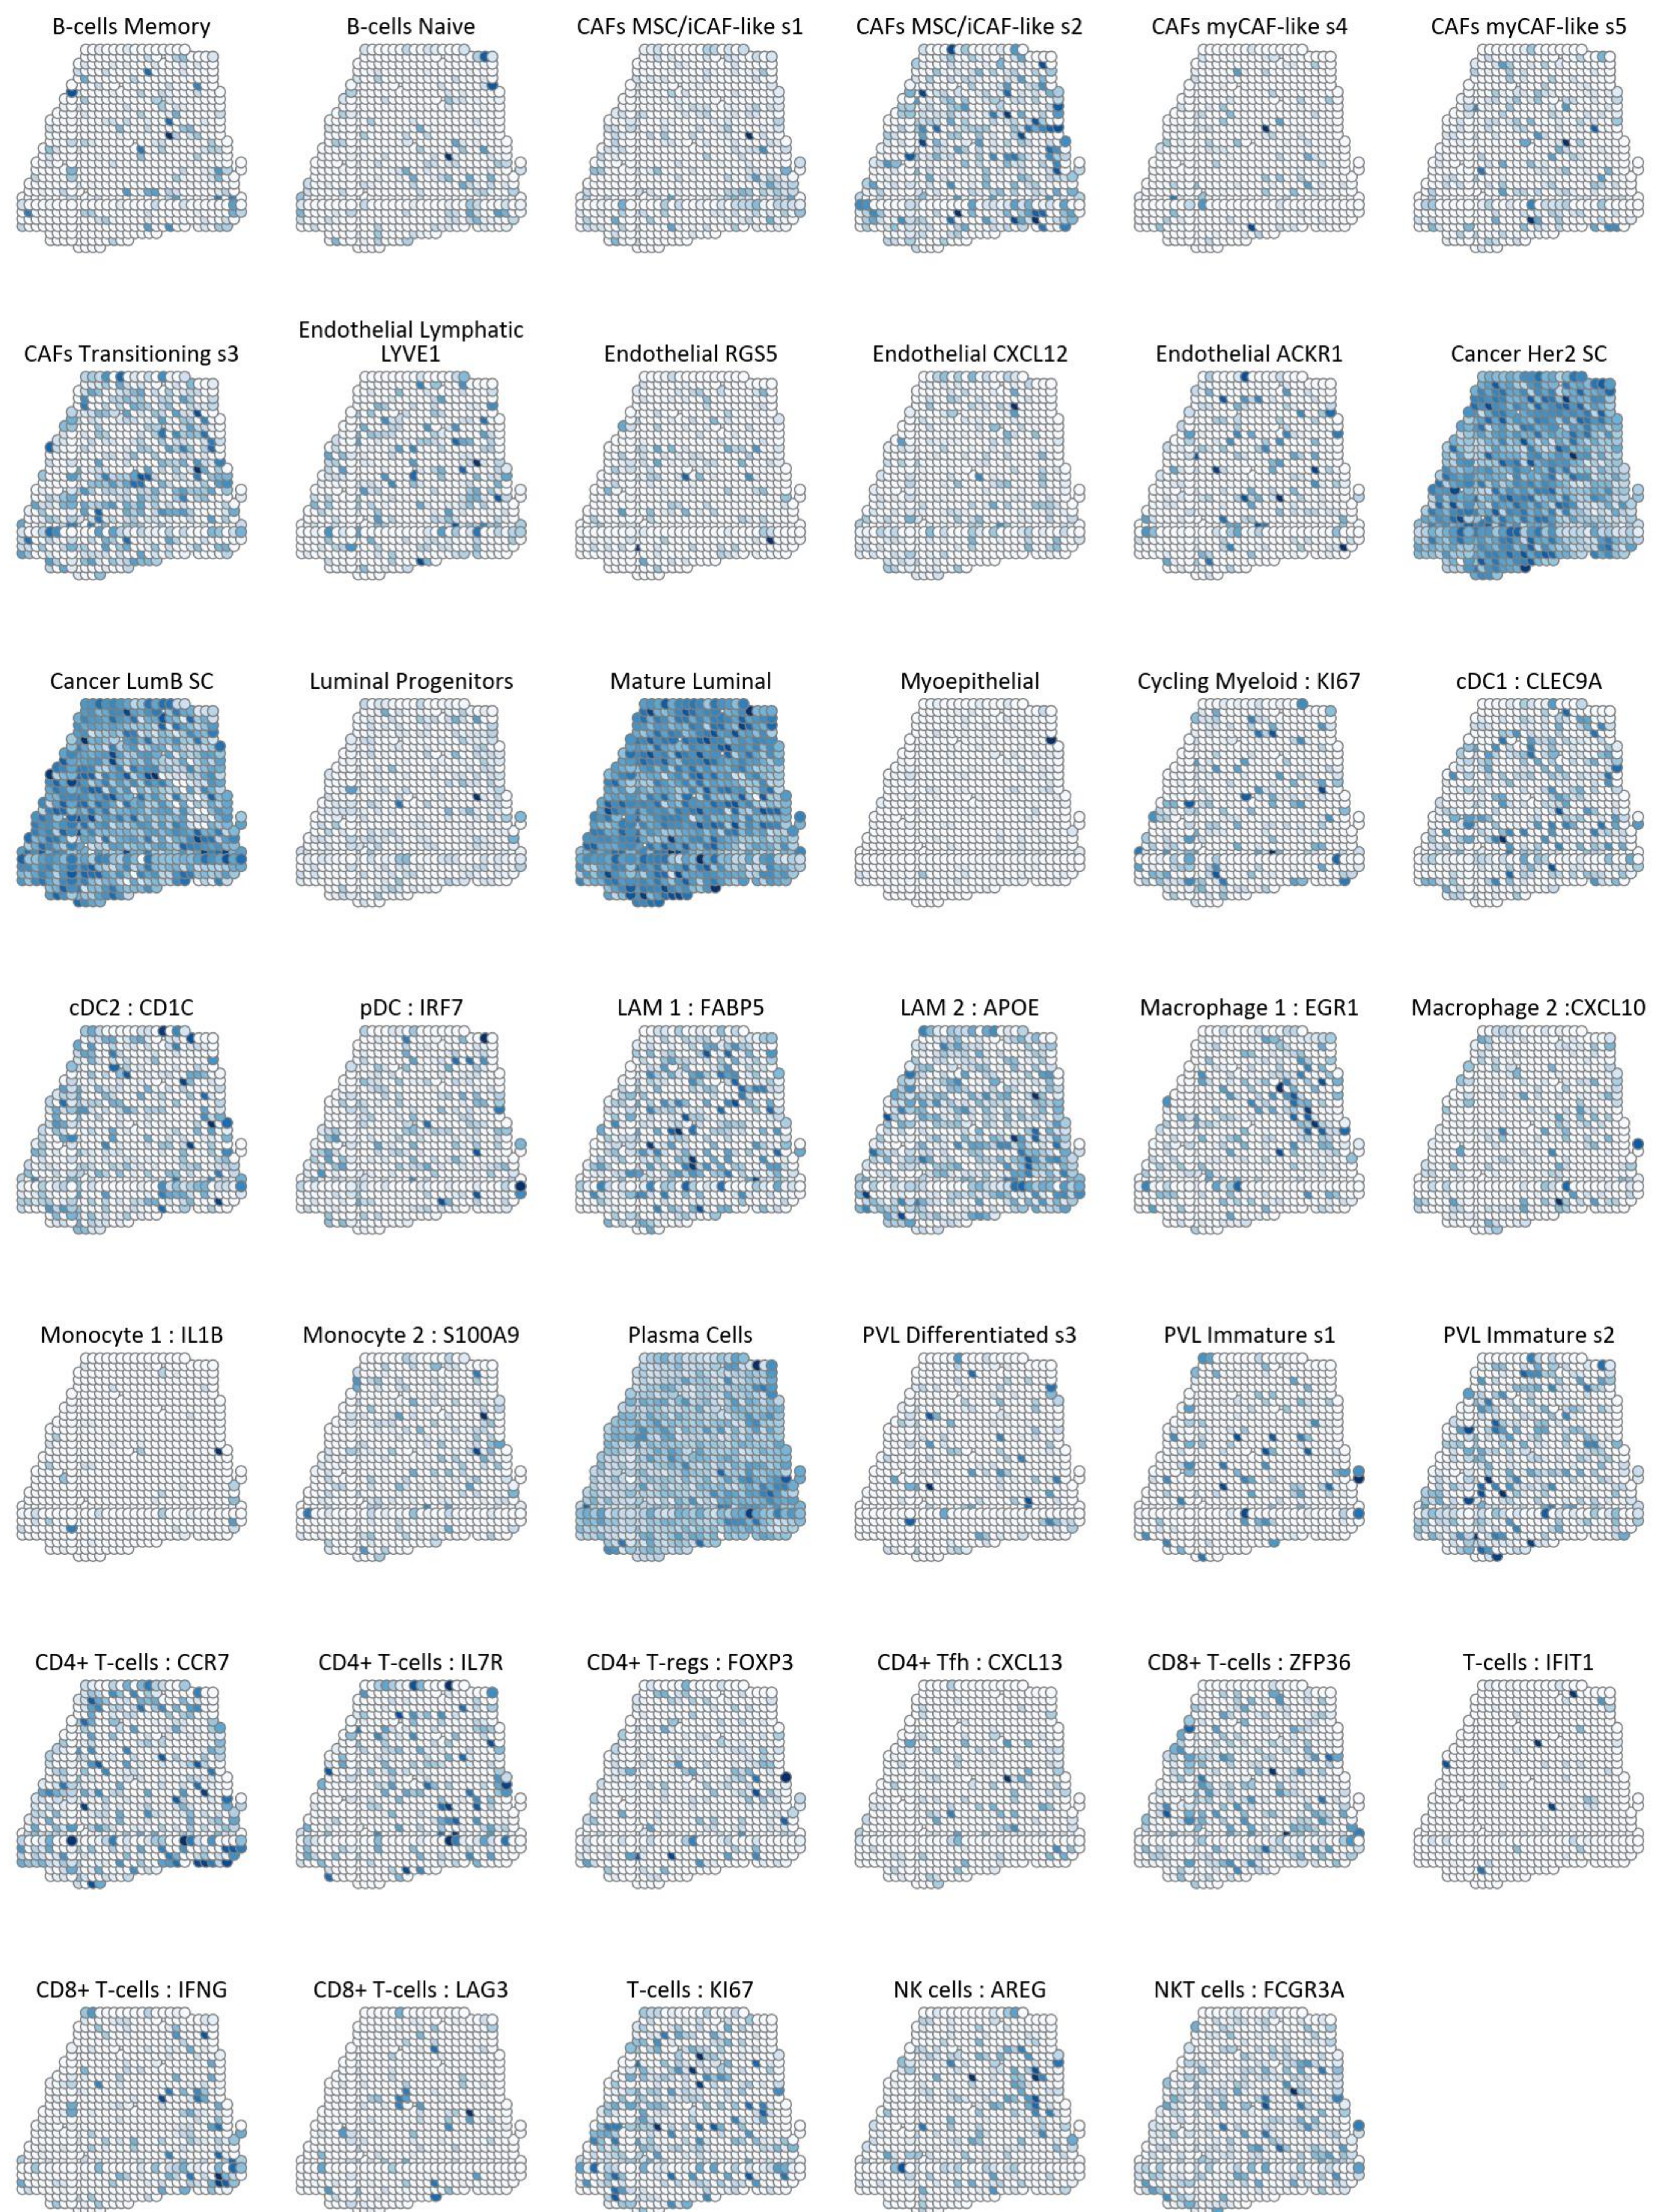

# subset\_B1

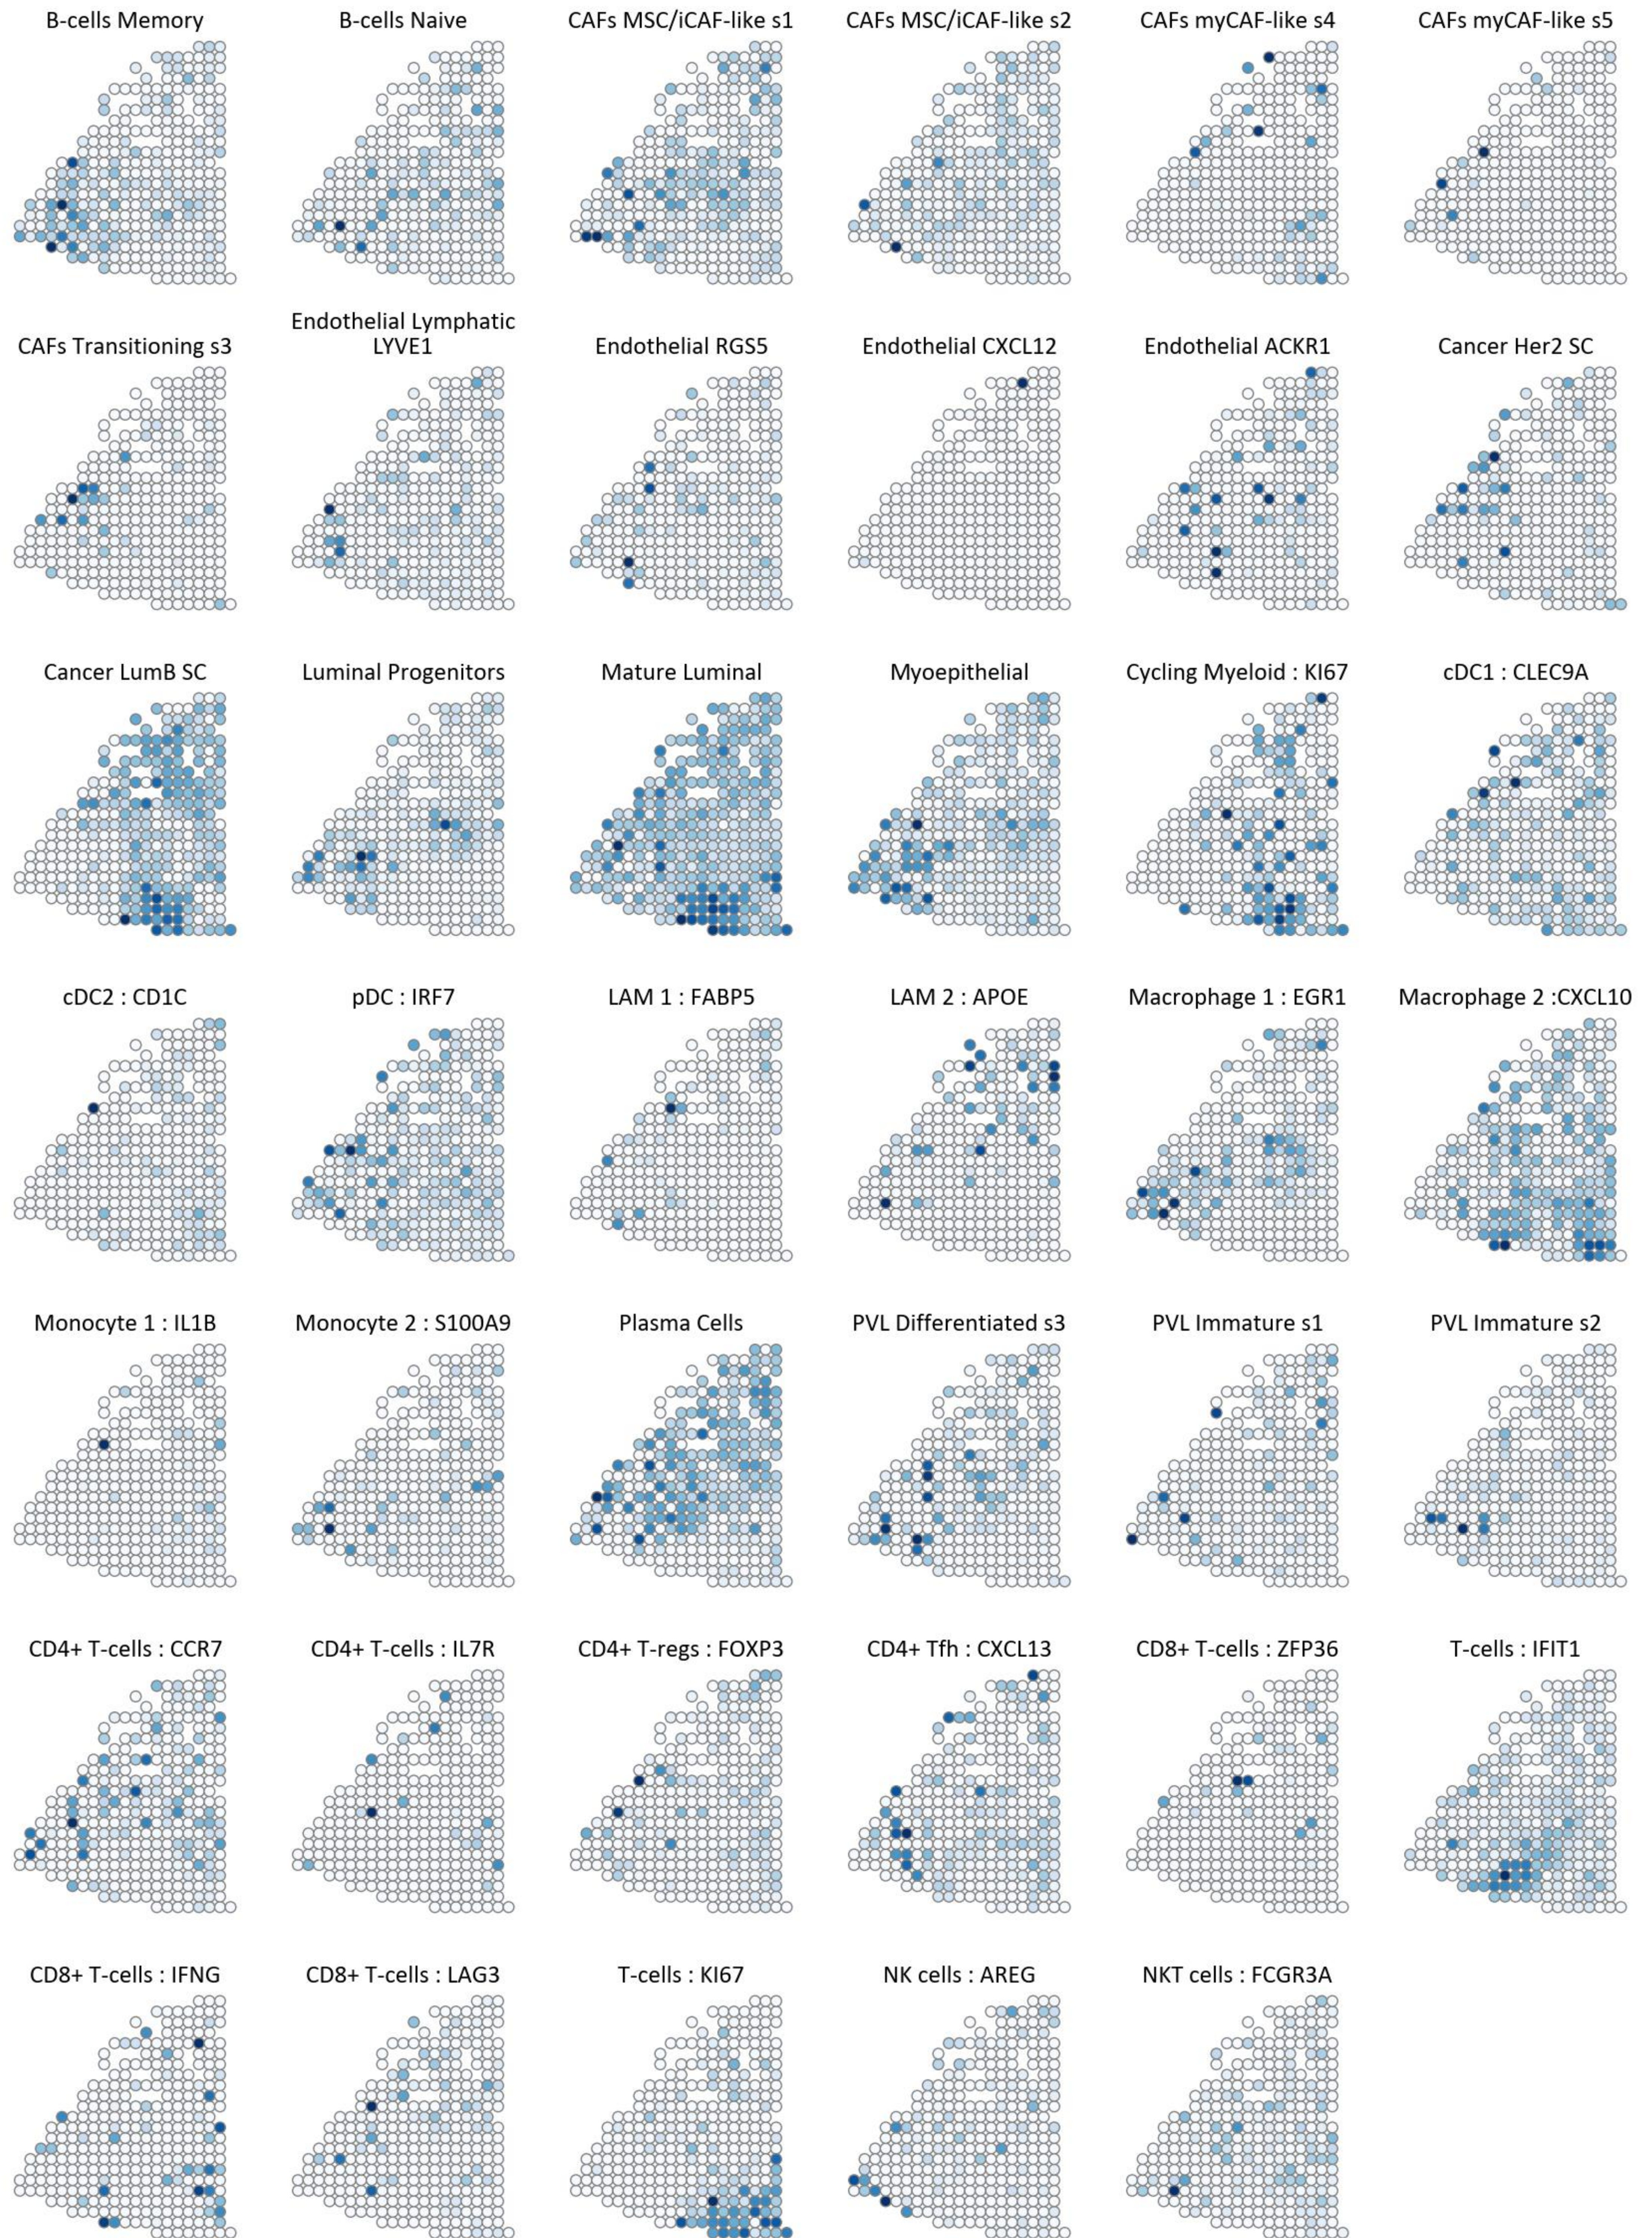

# subset\_G1

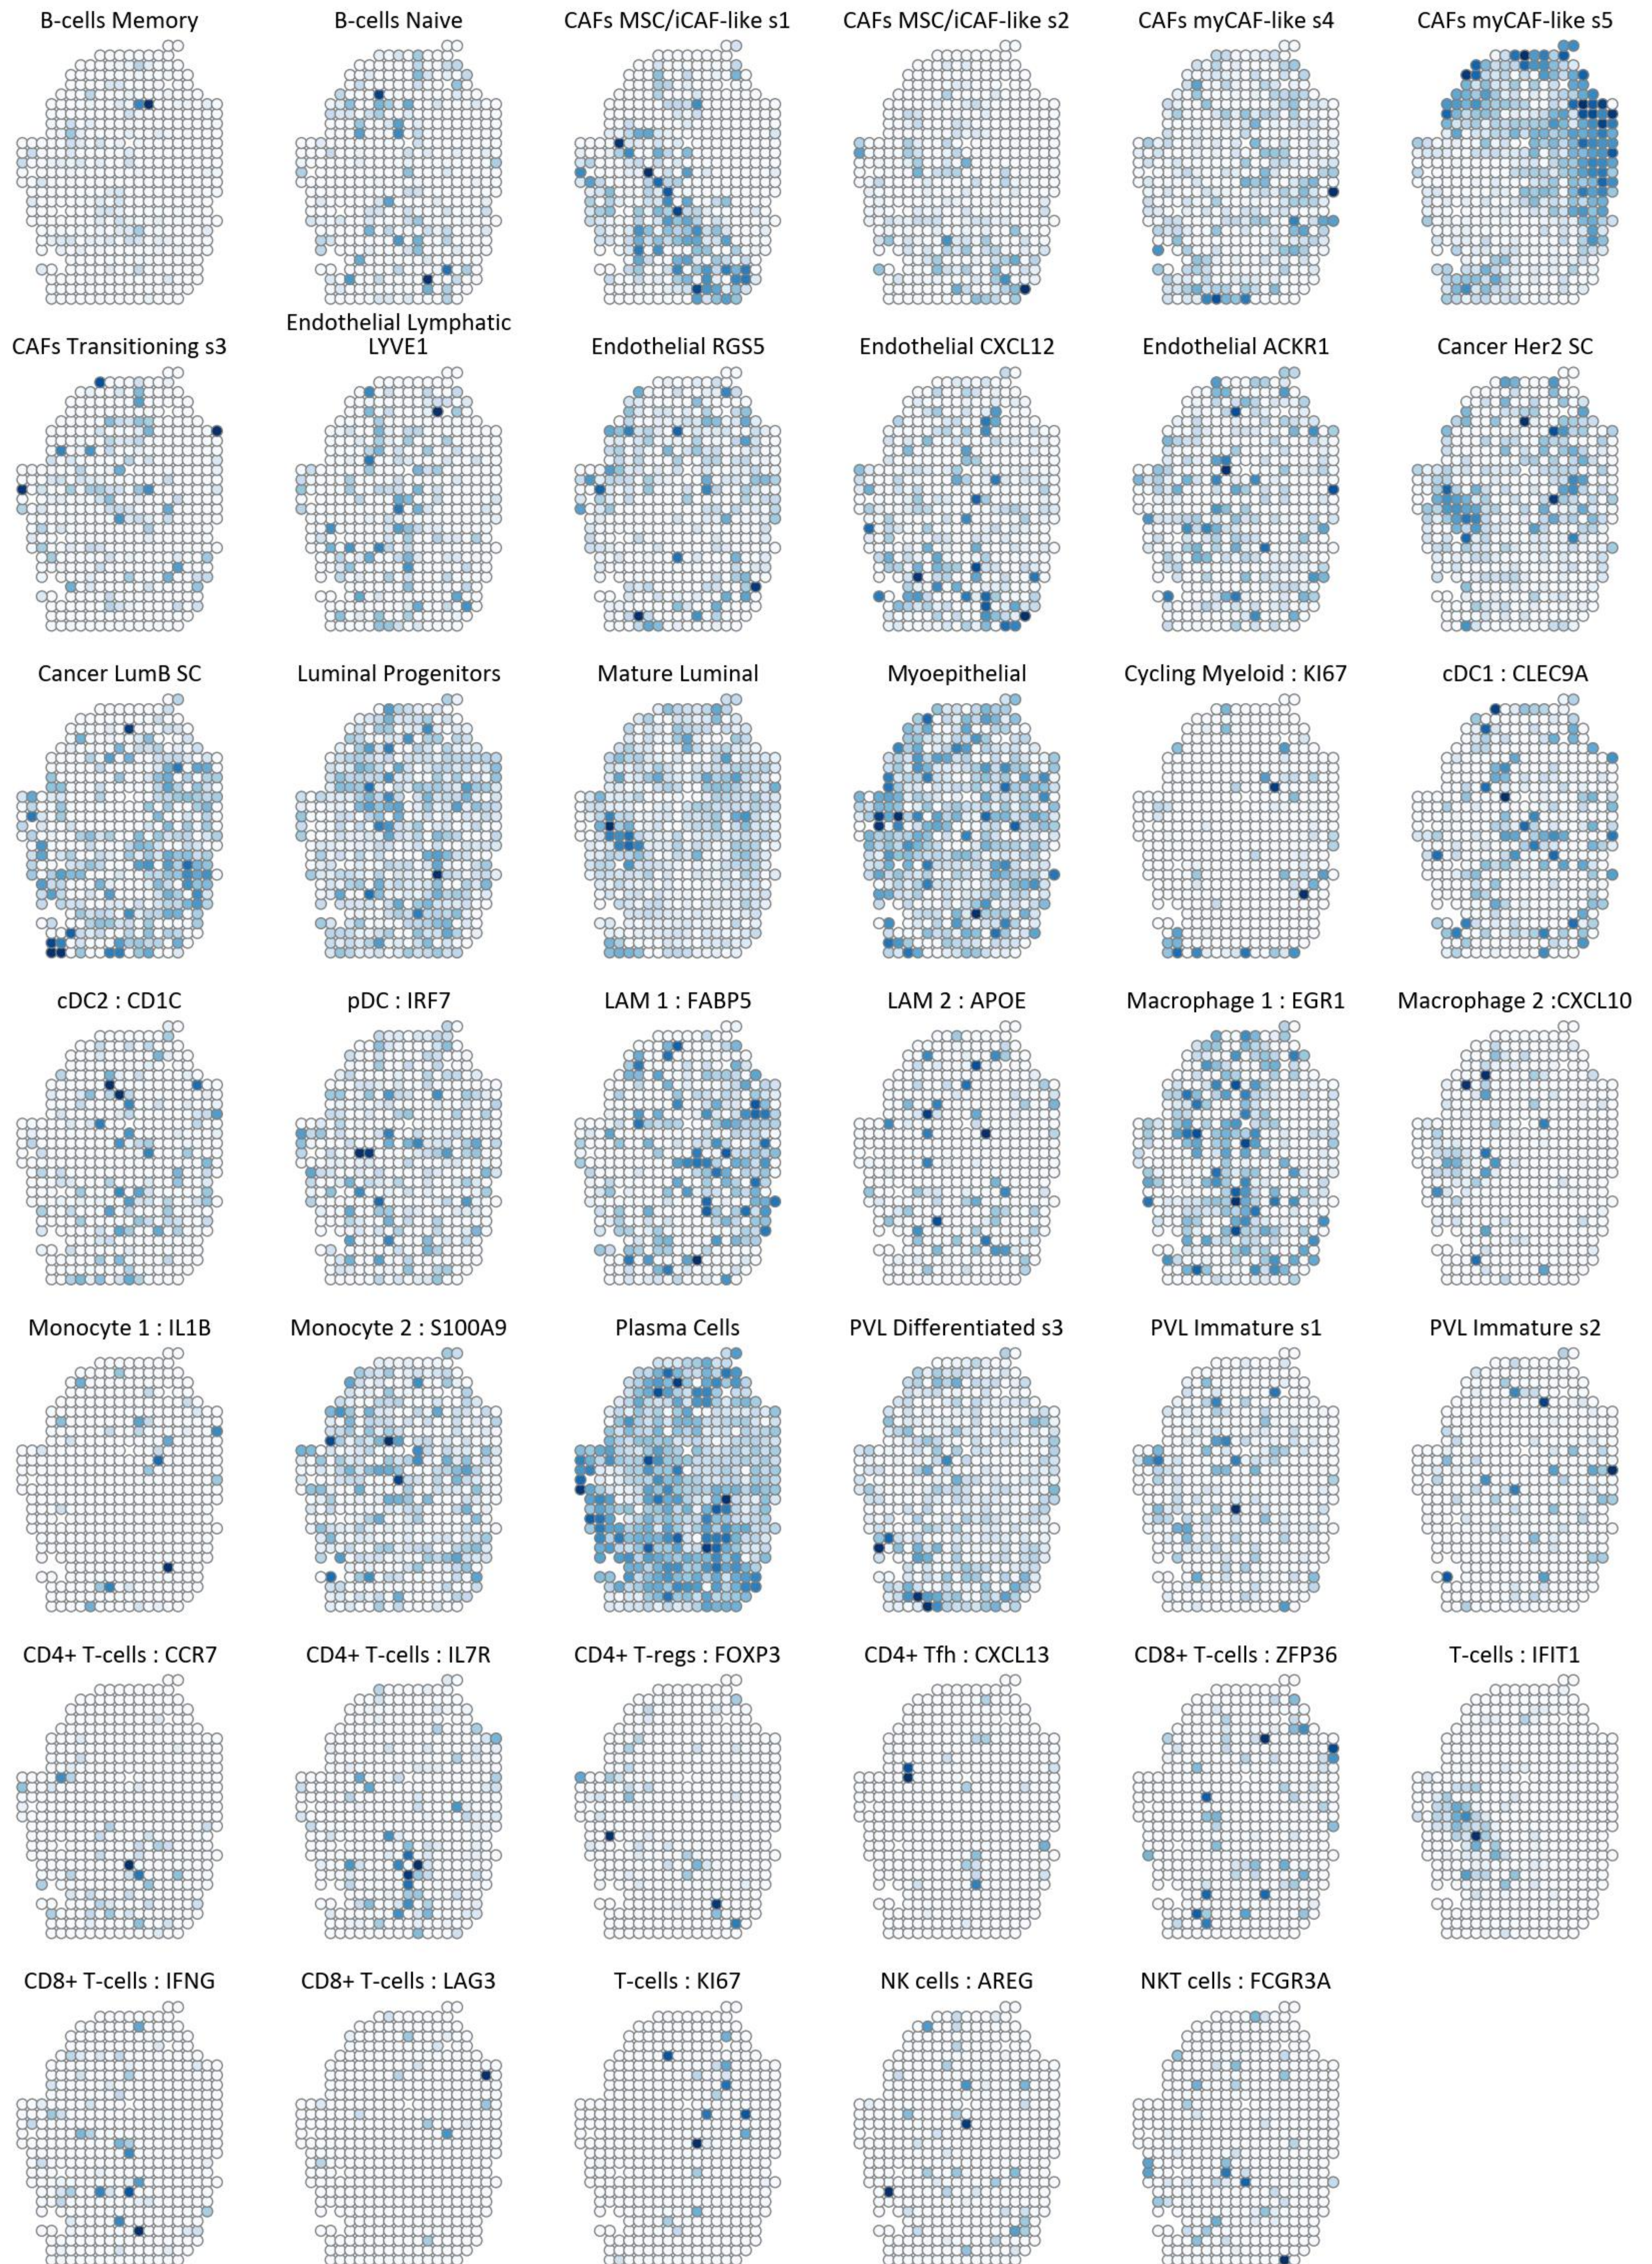

# subset\_D3

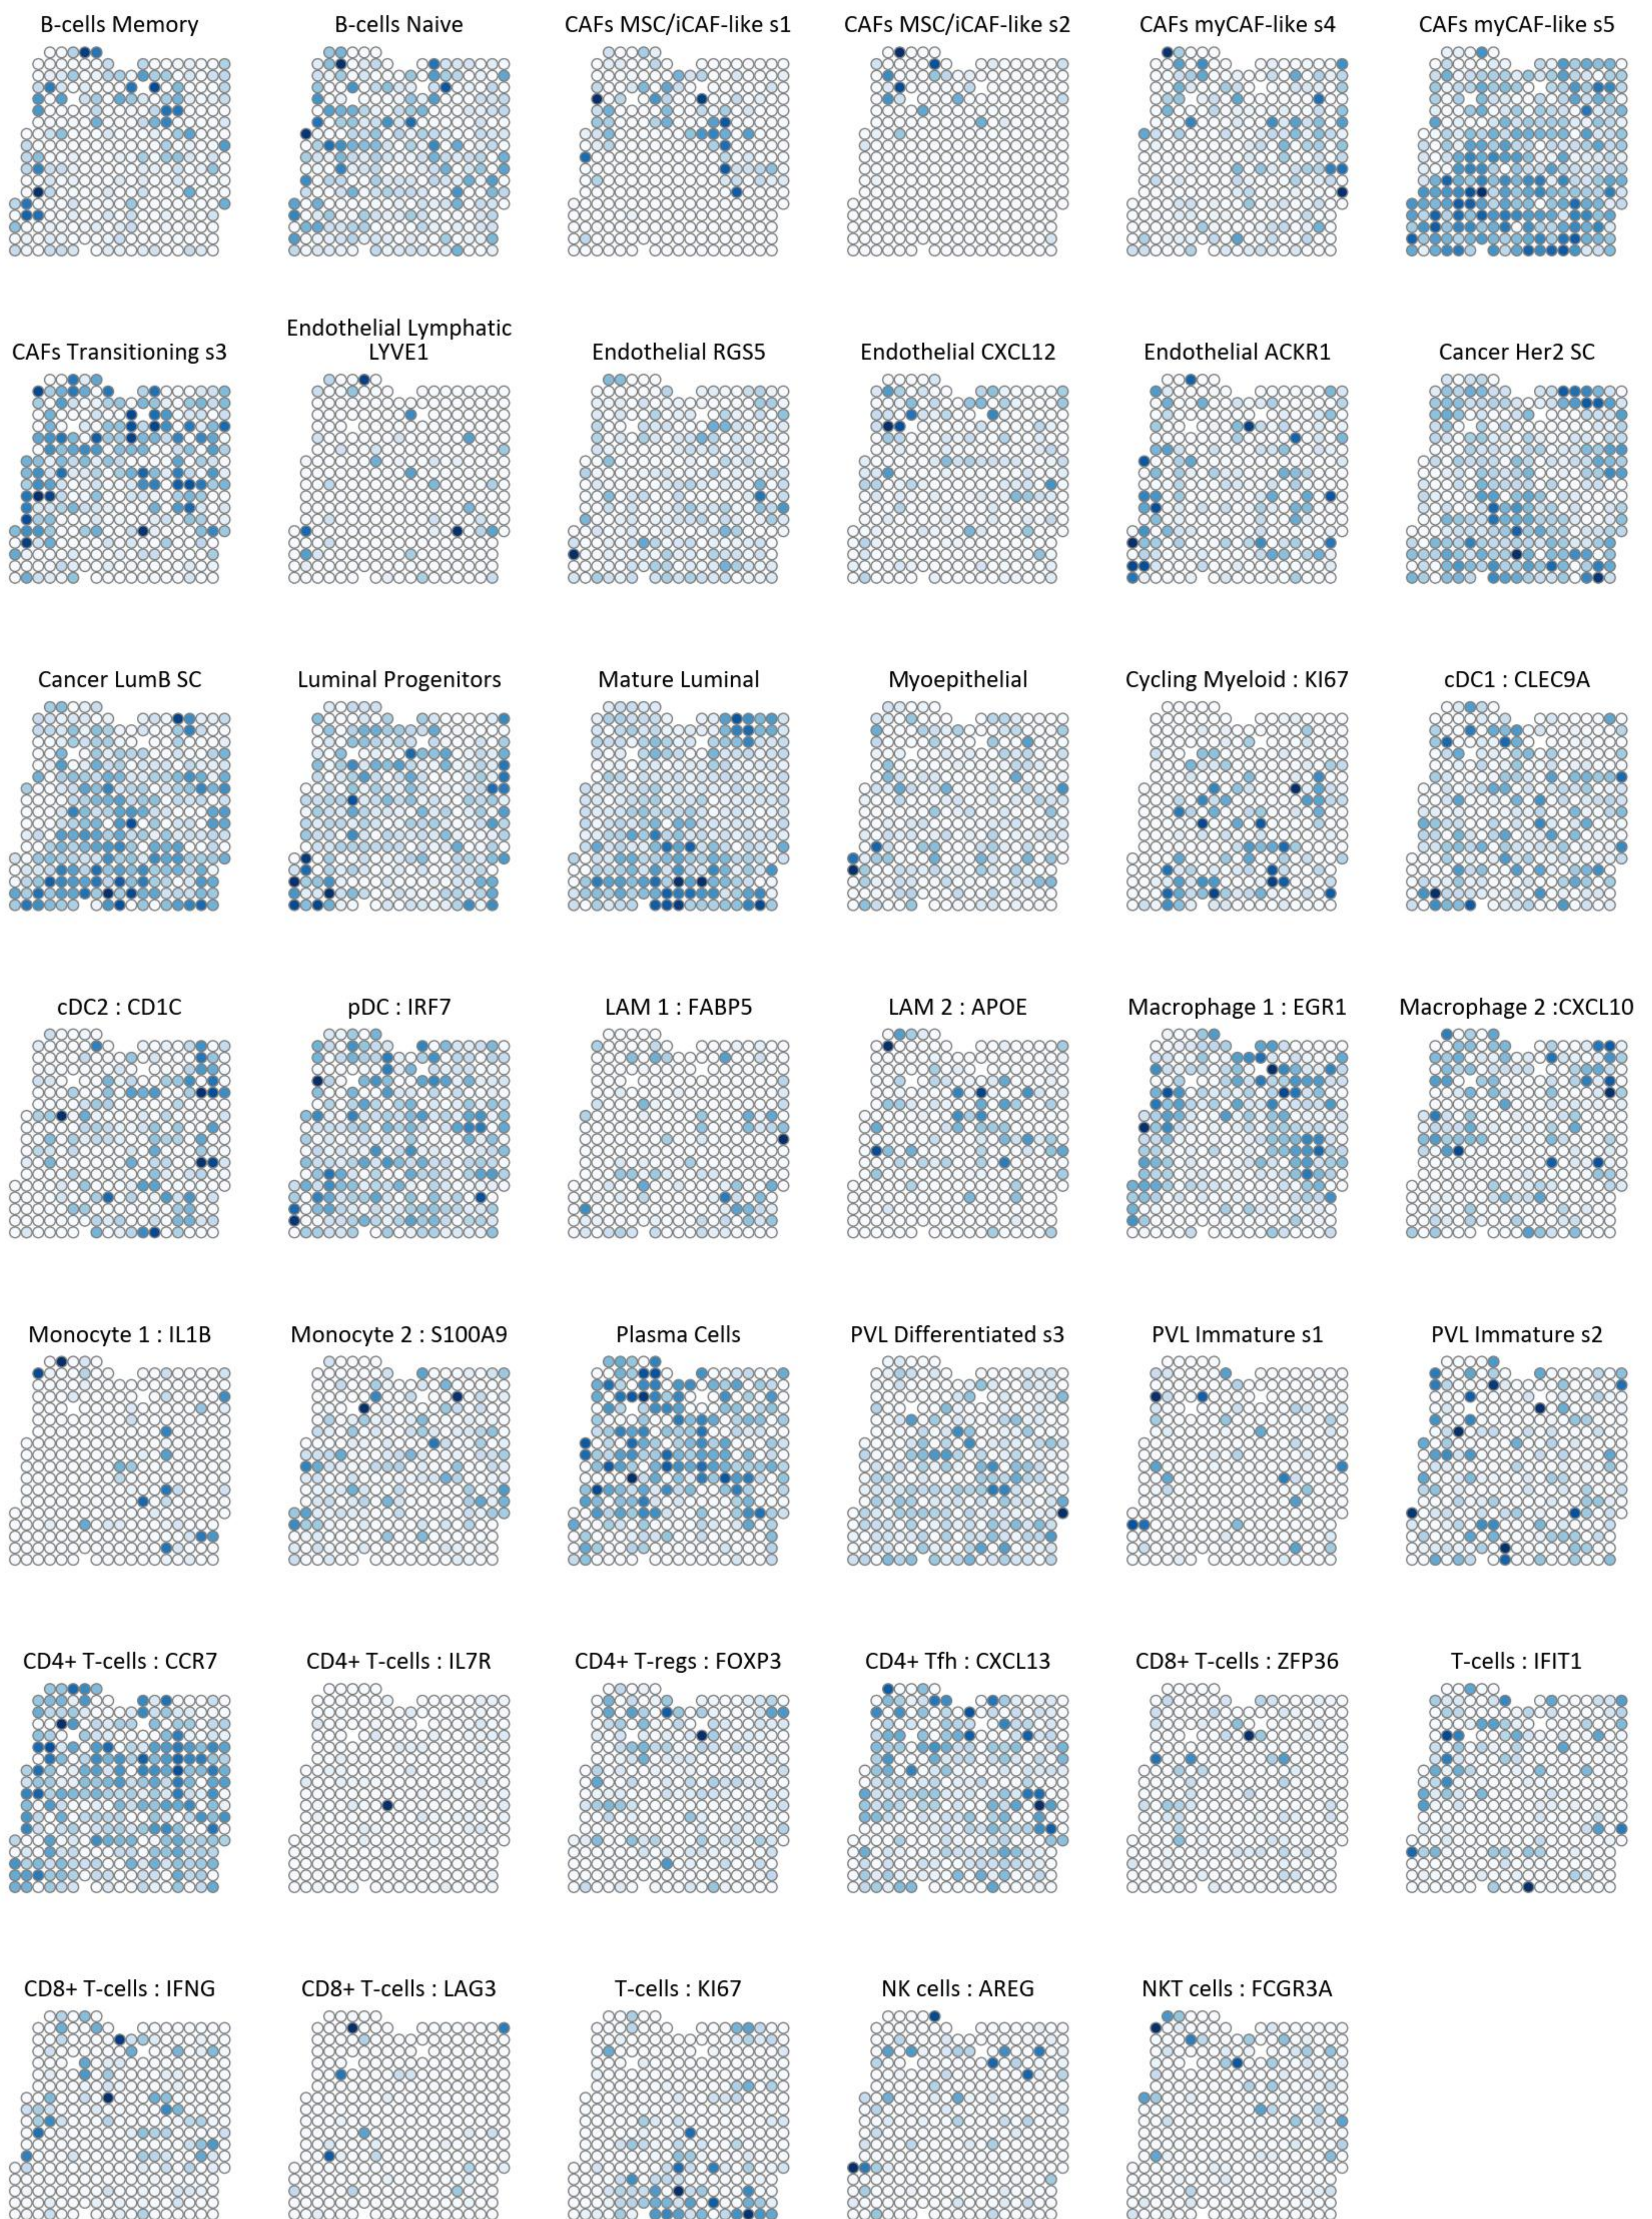

# subset\_C6

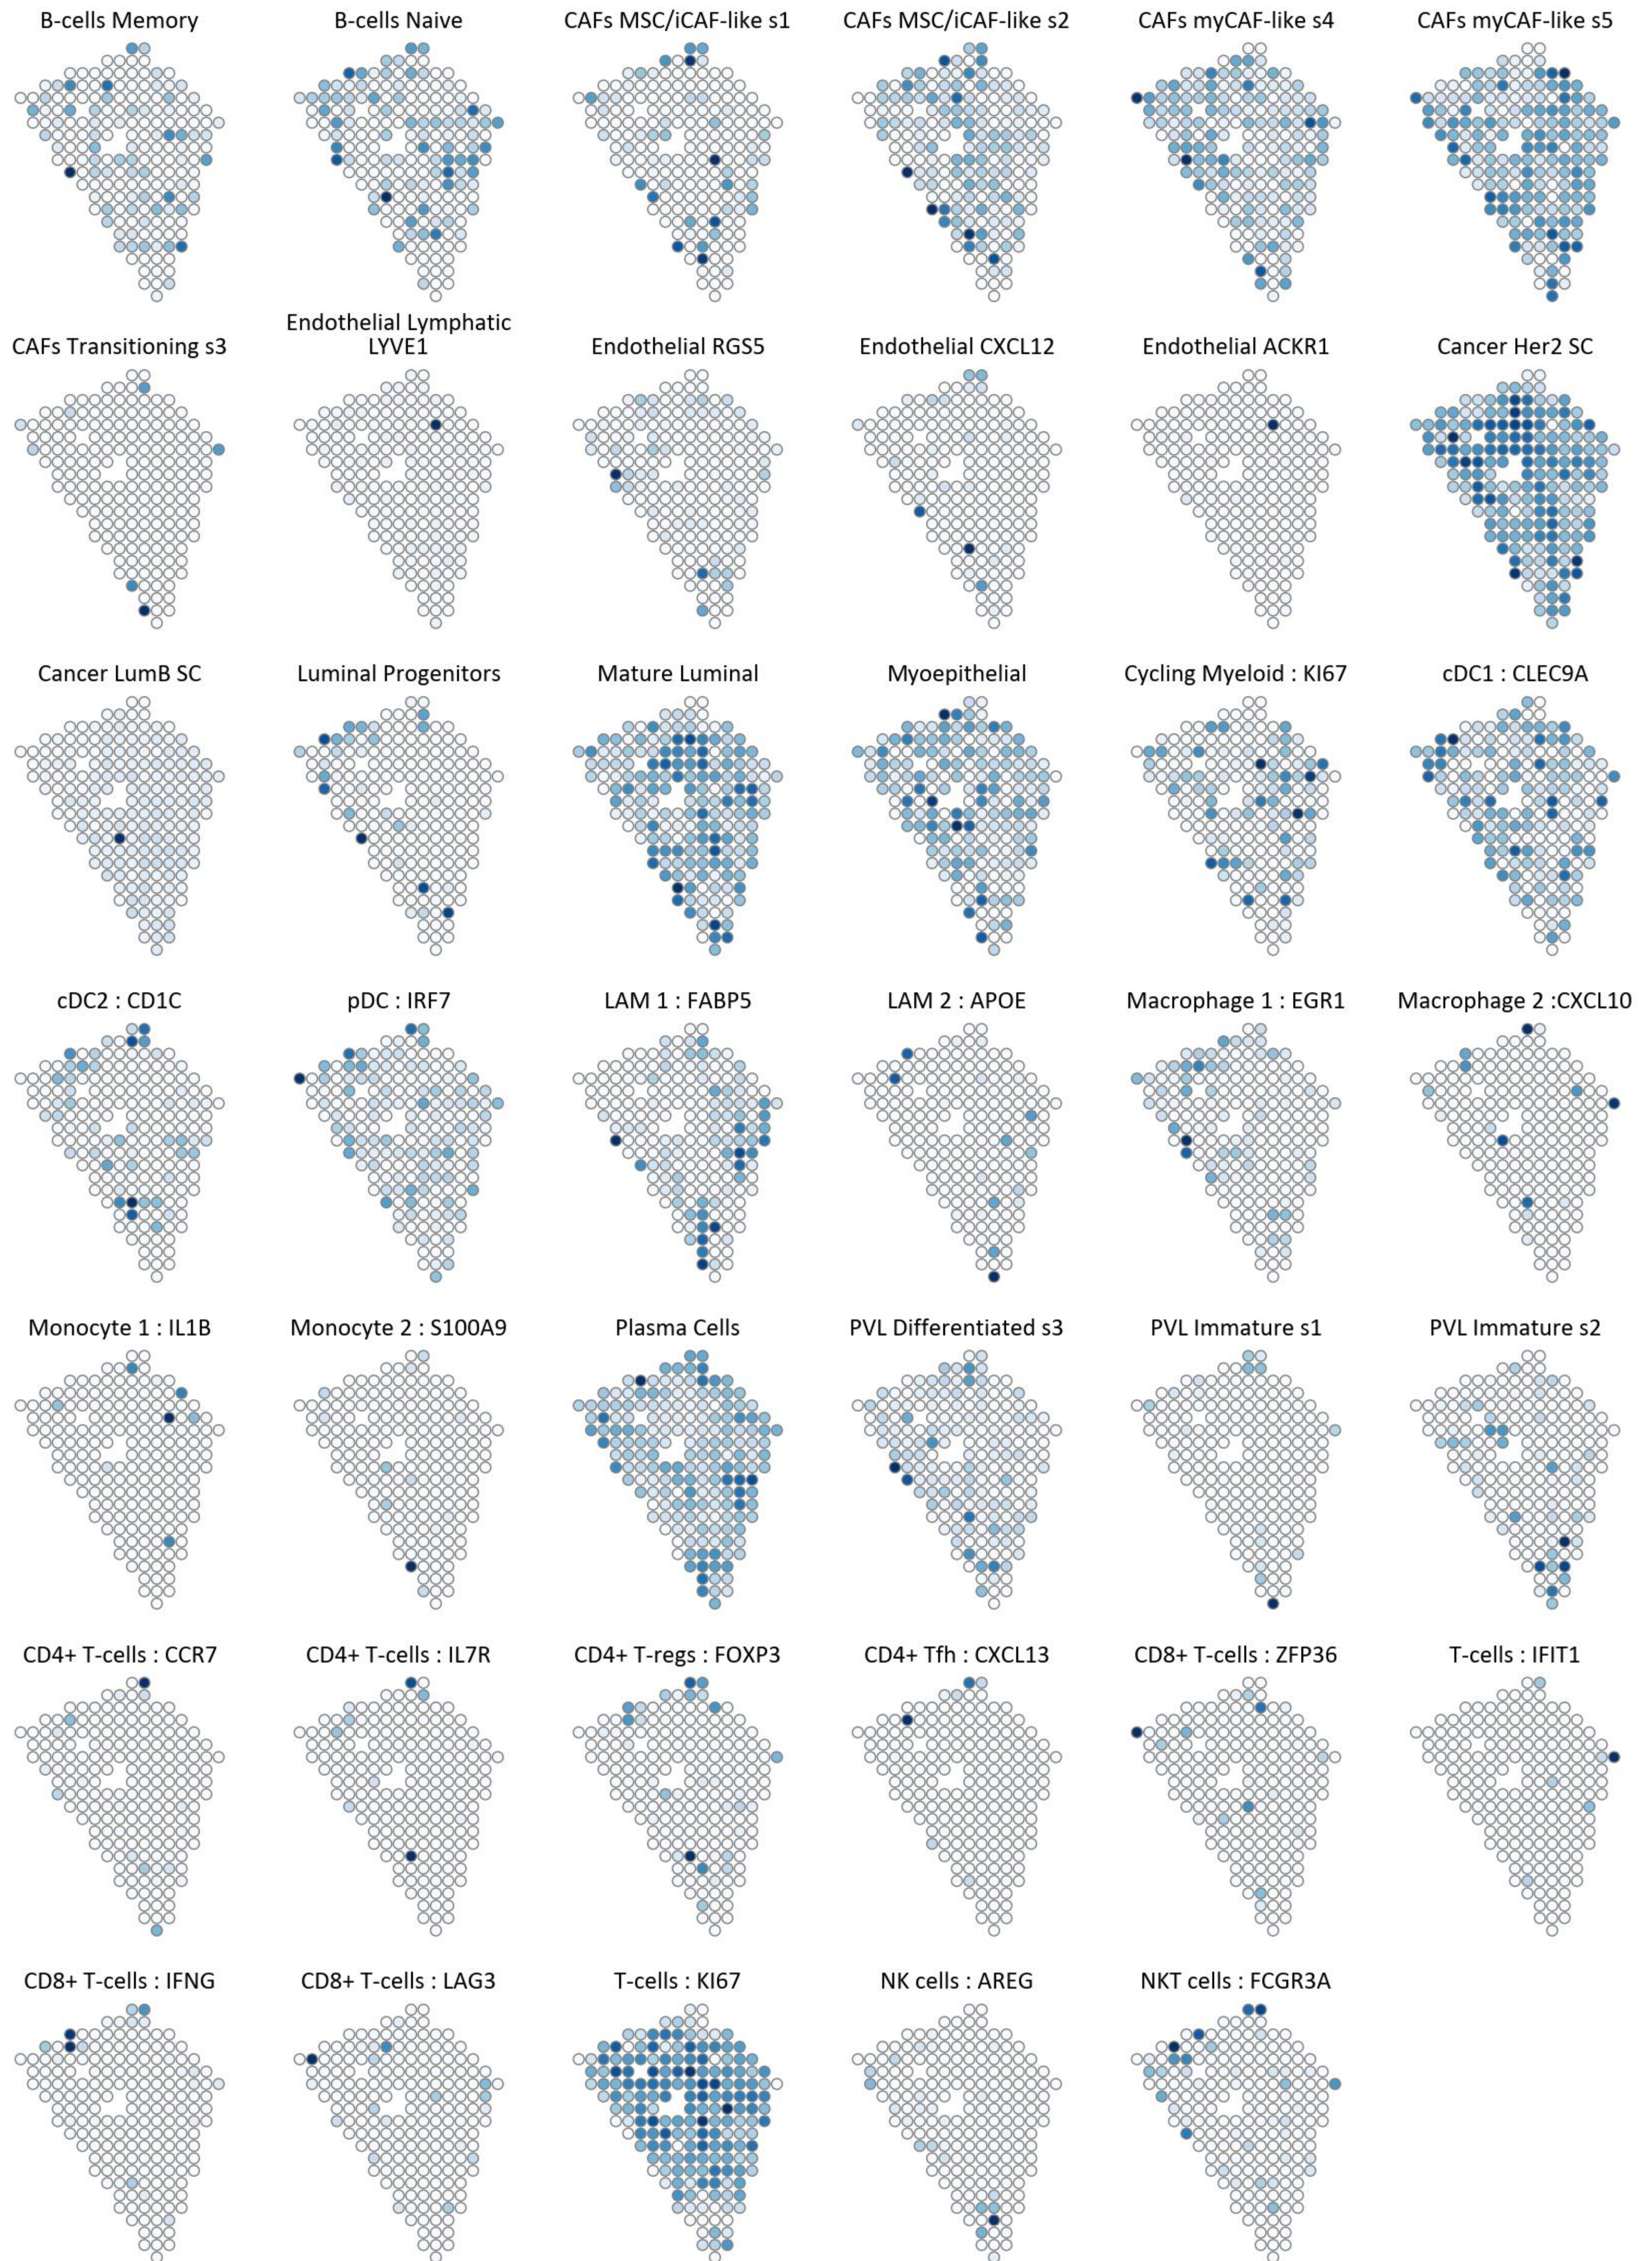

# subset\_B5

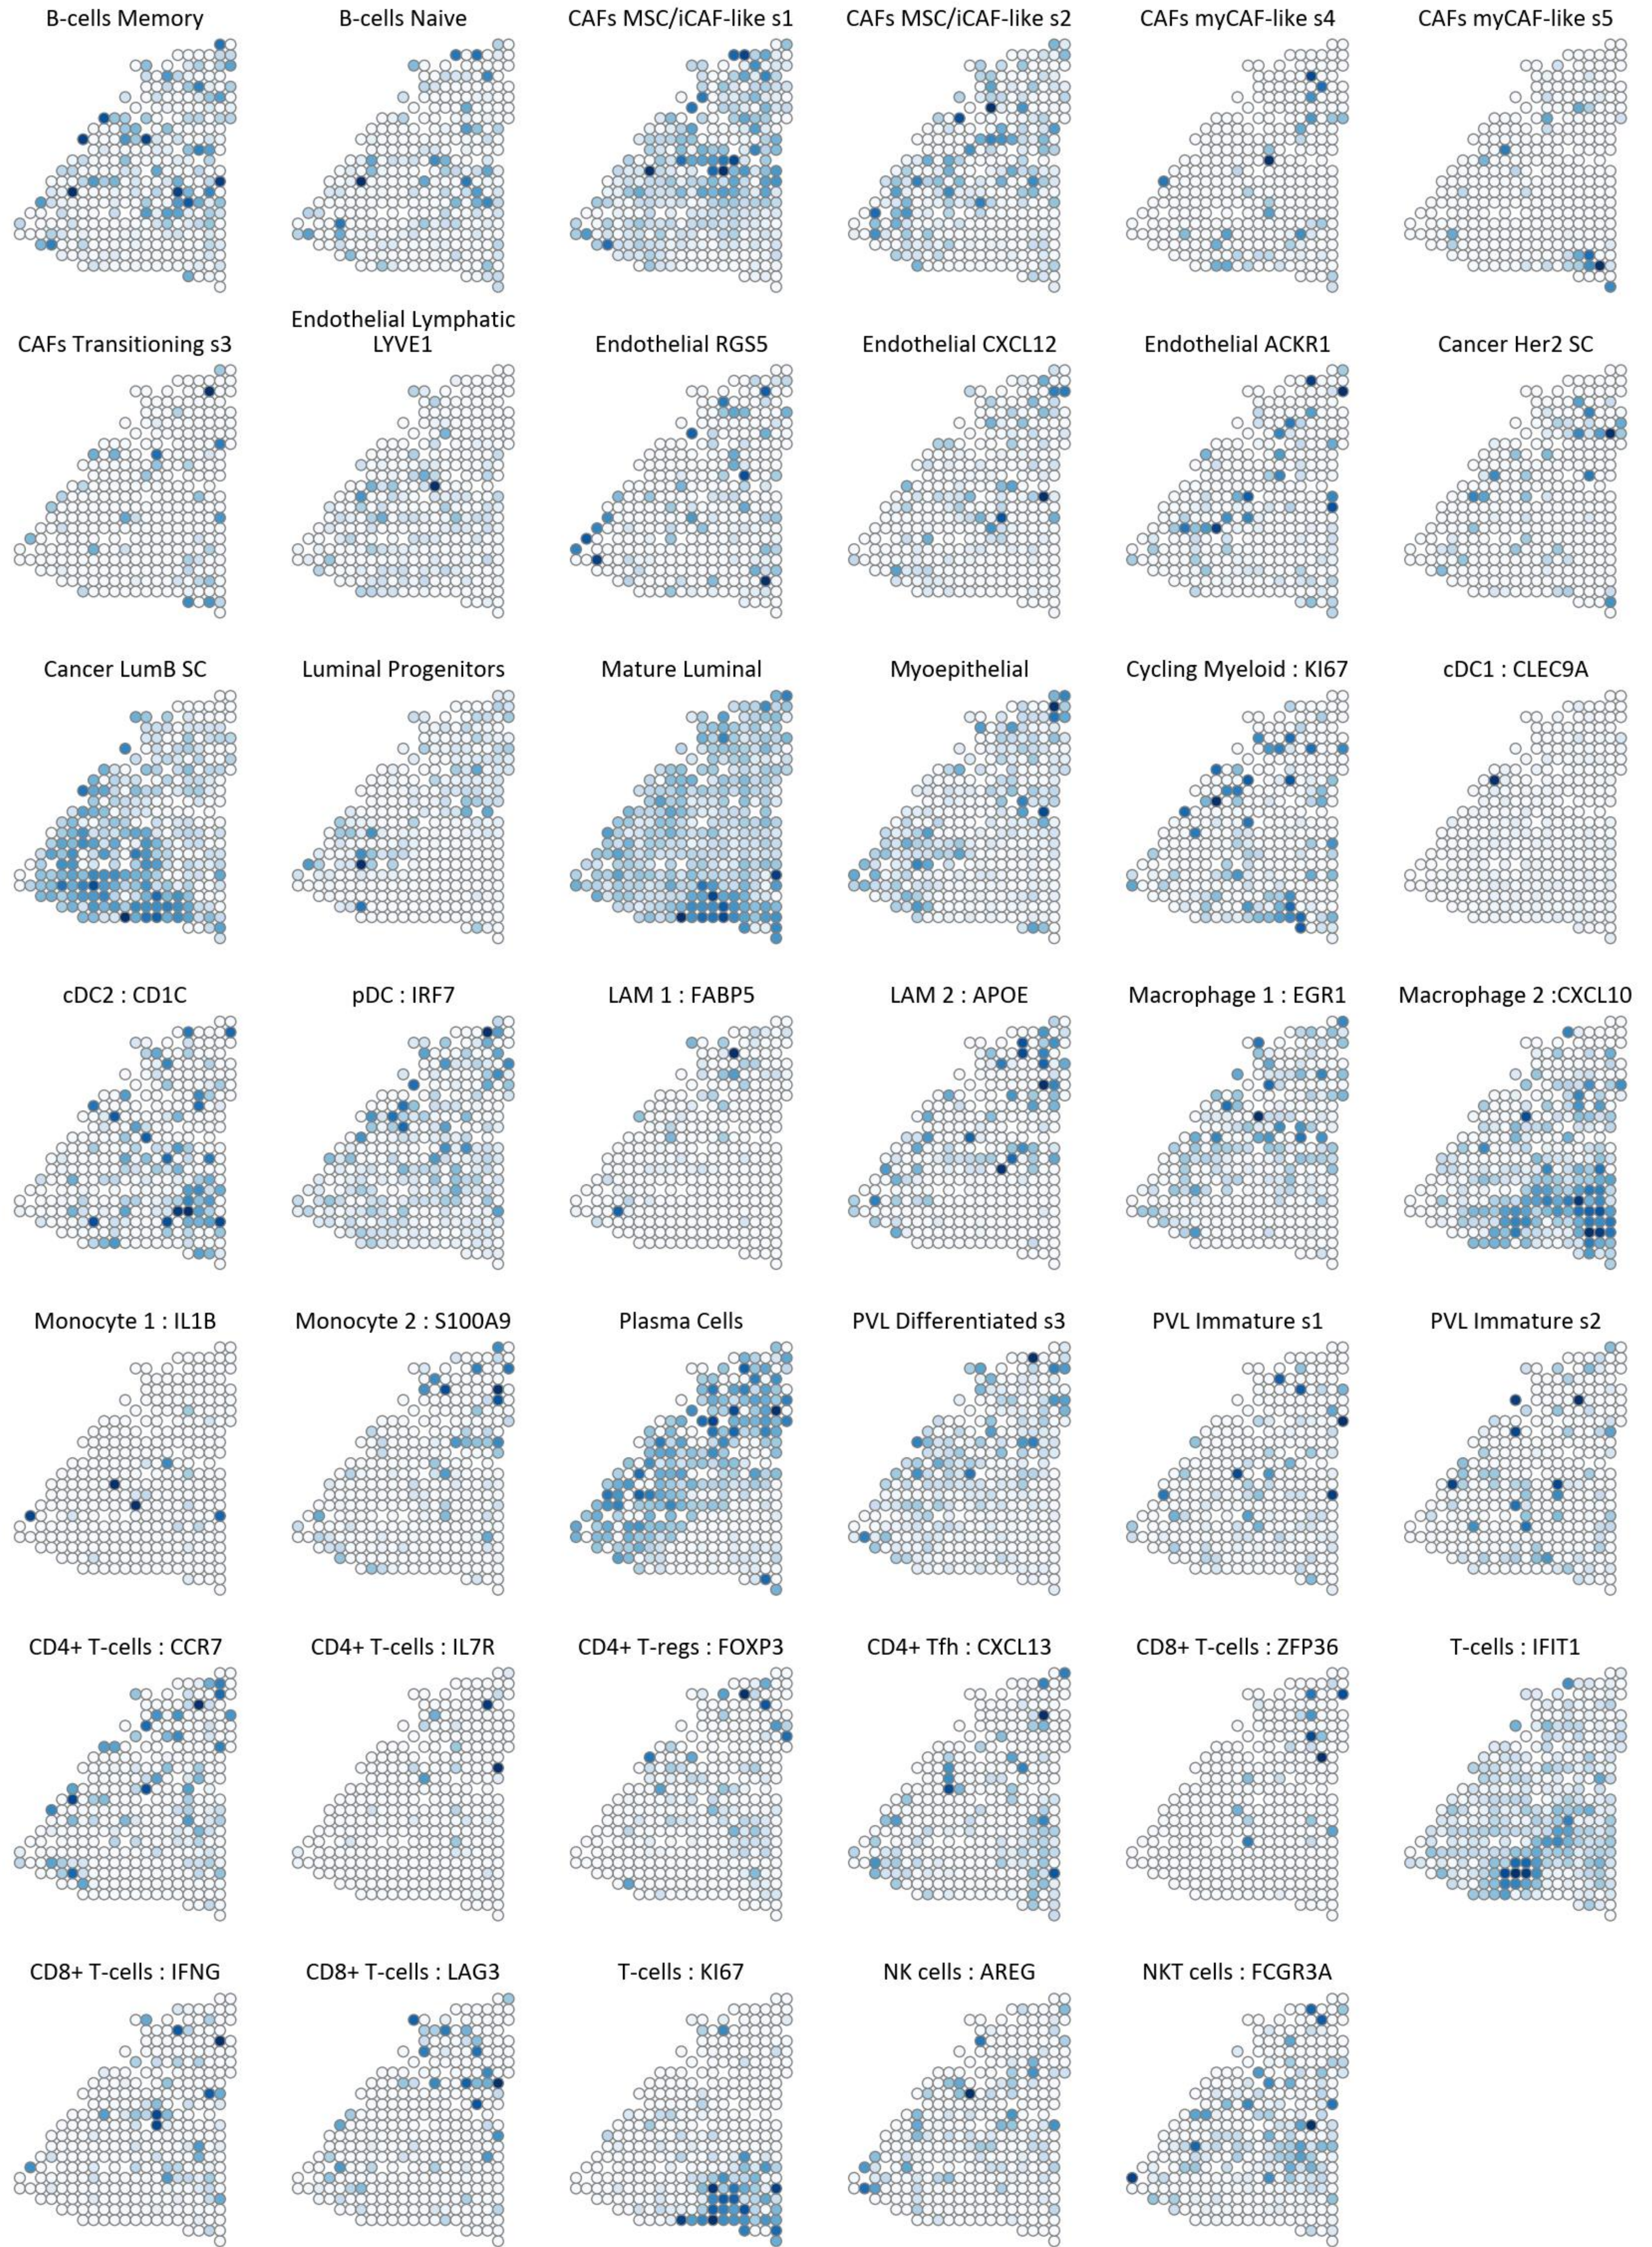

# subset\_E3

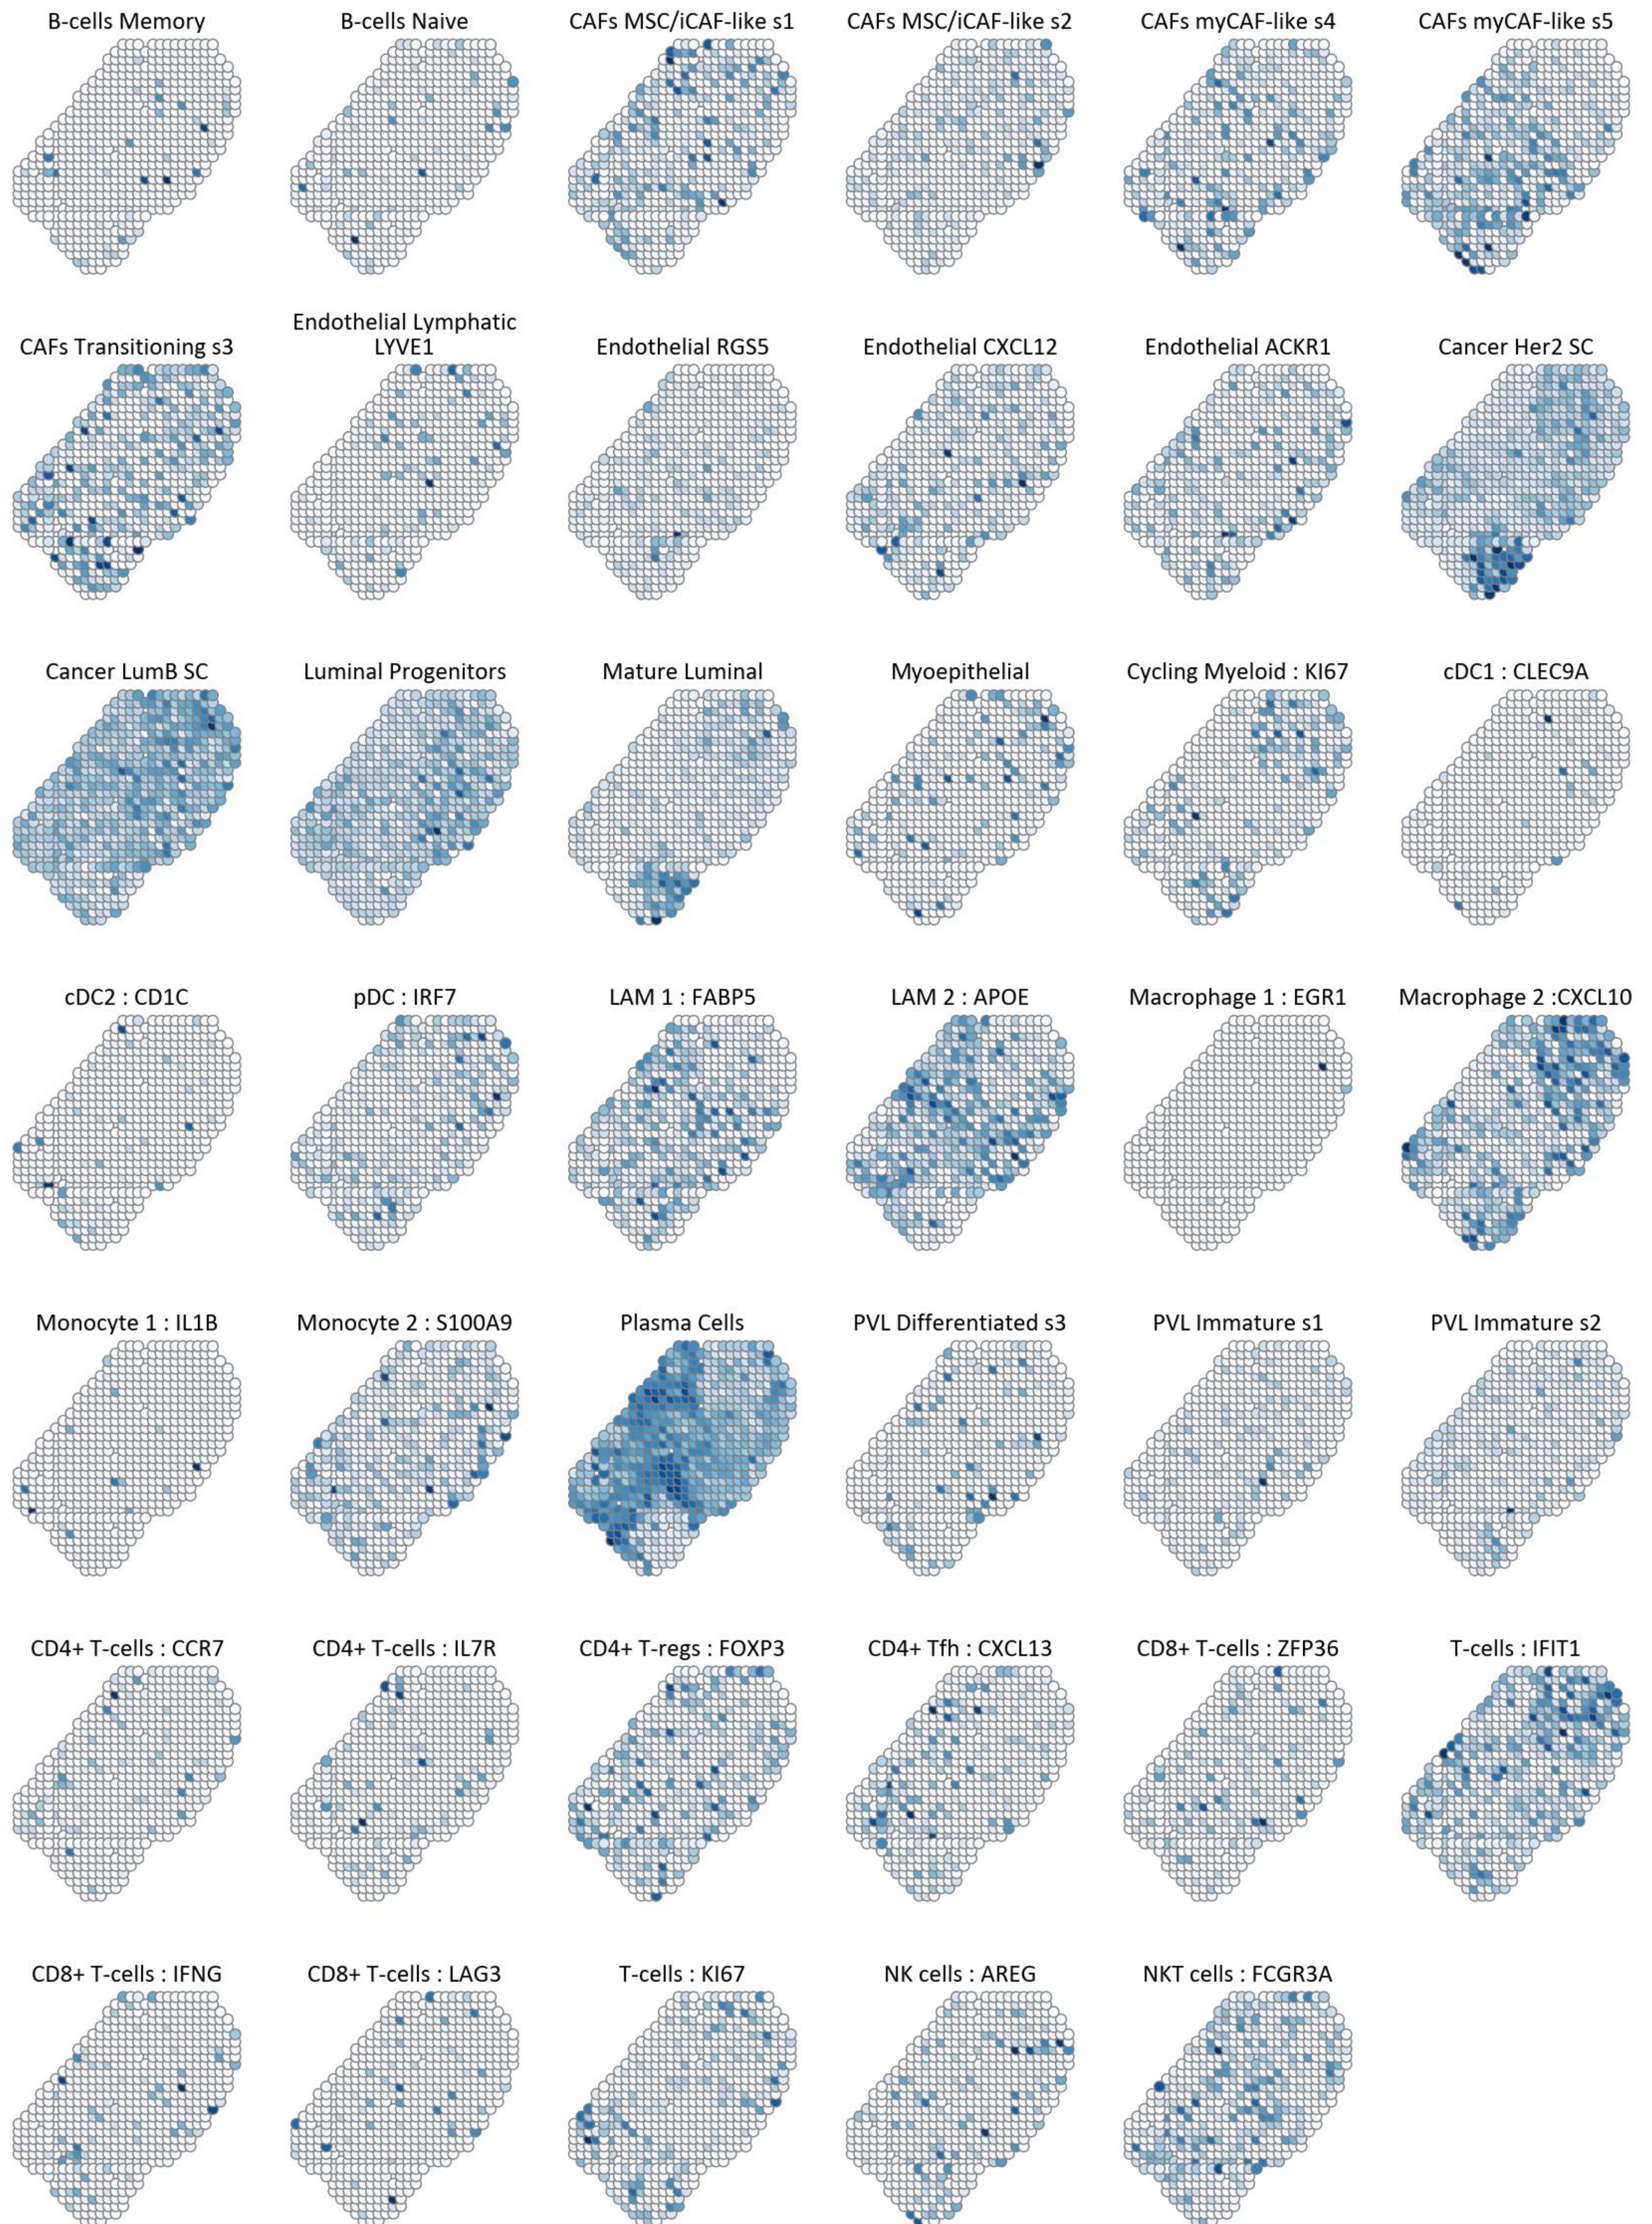



# subset\_H3

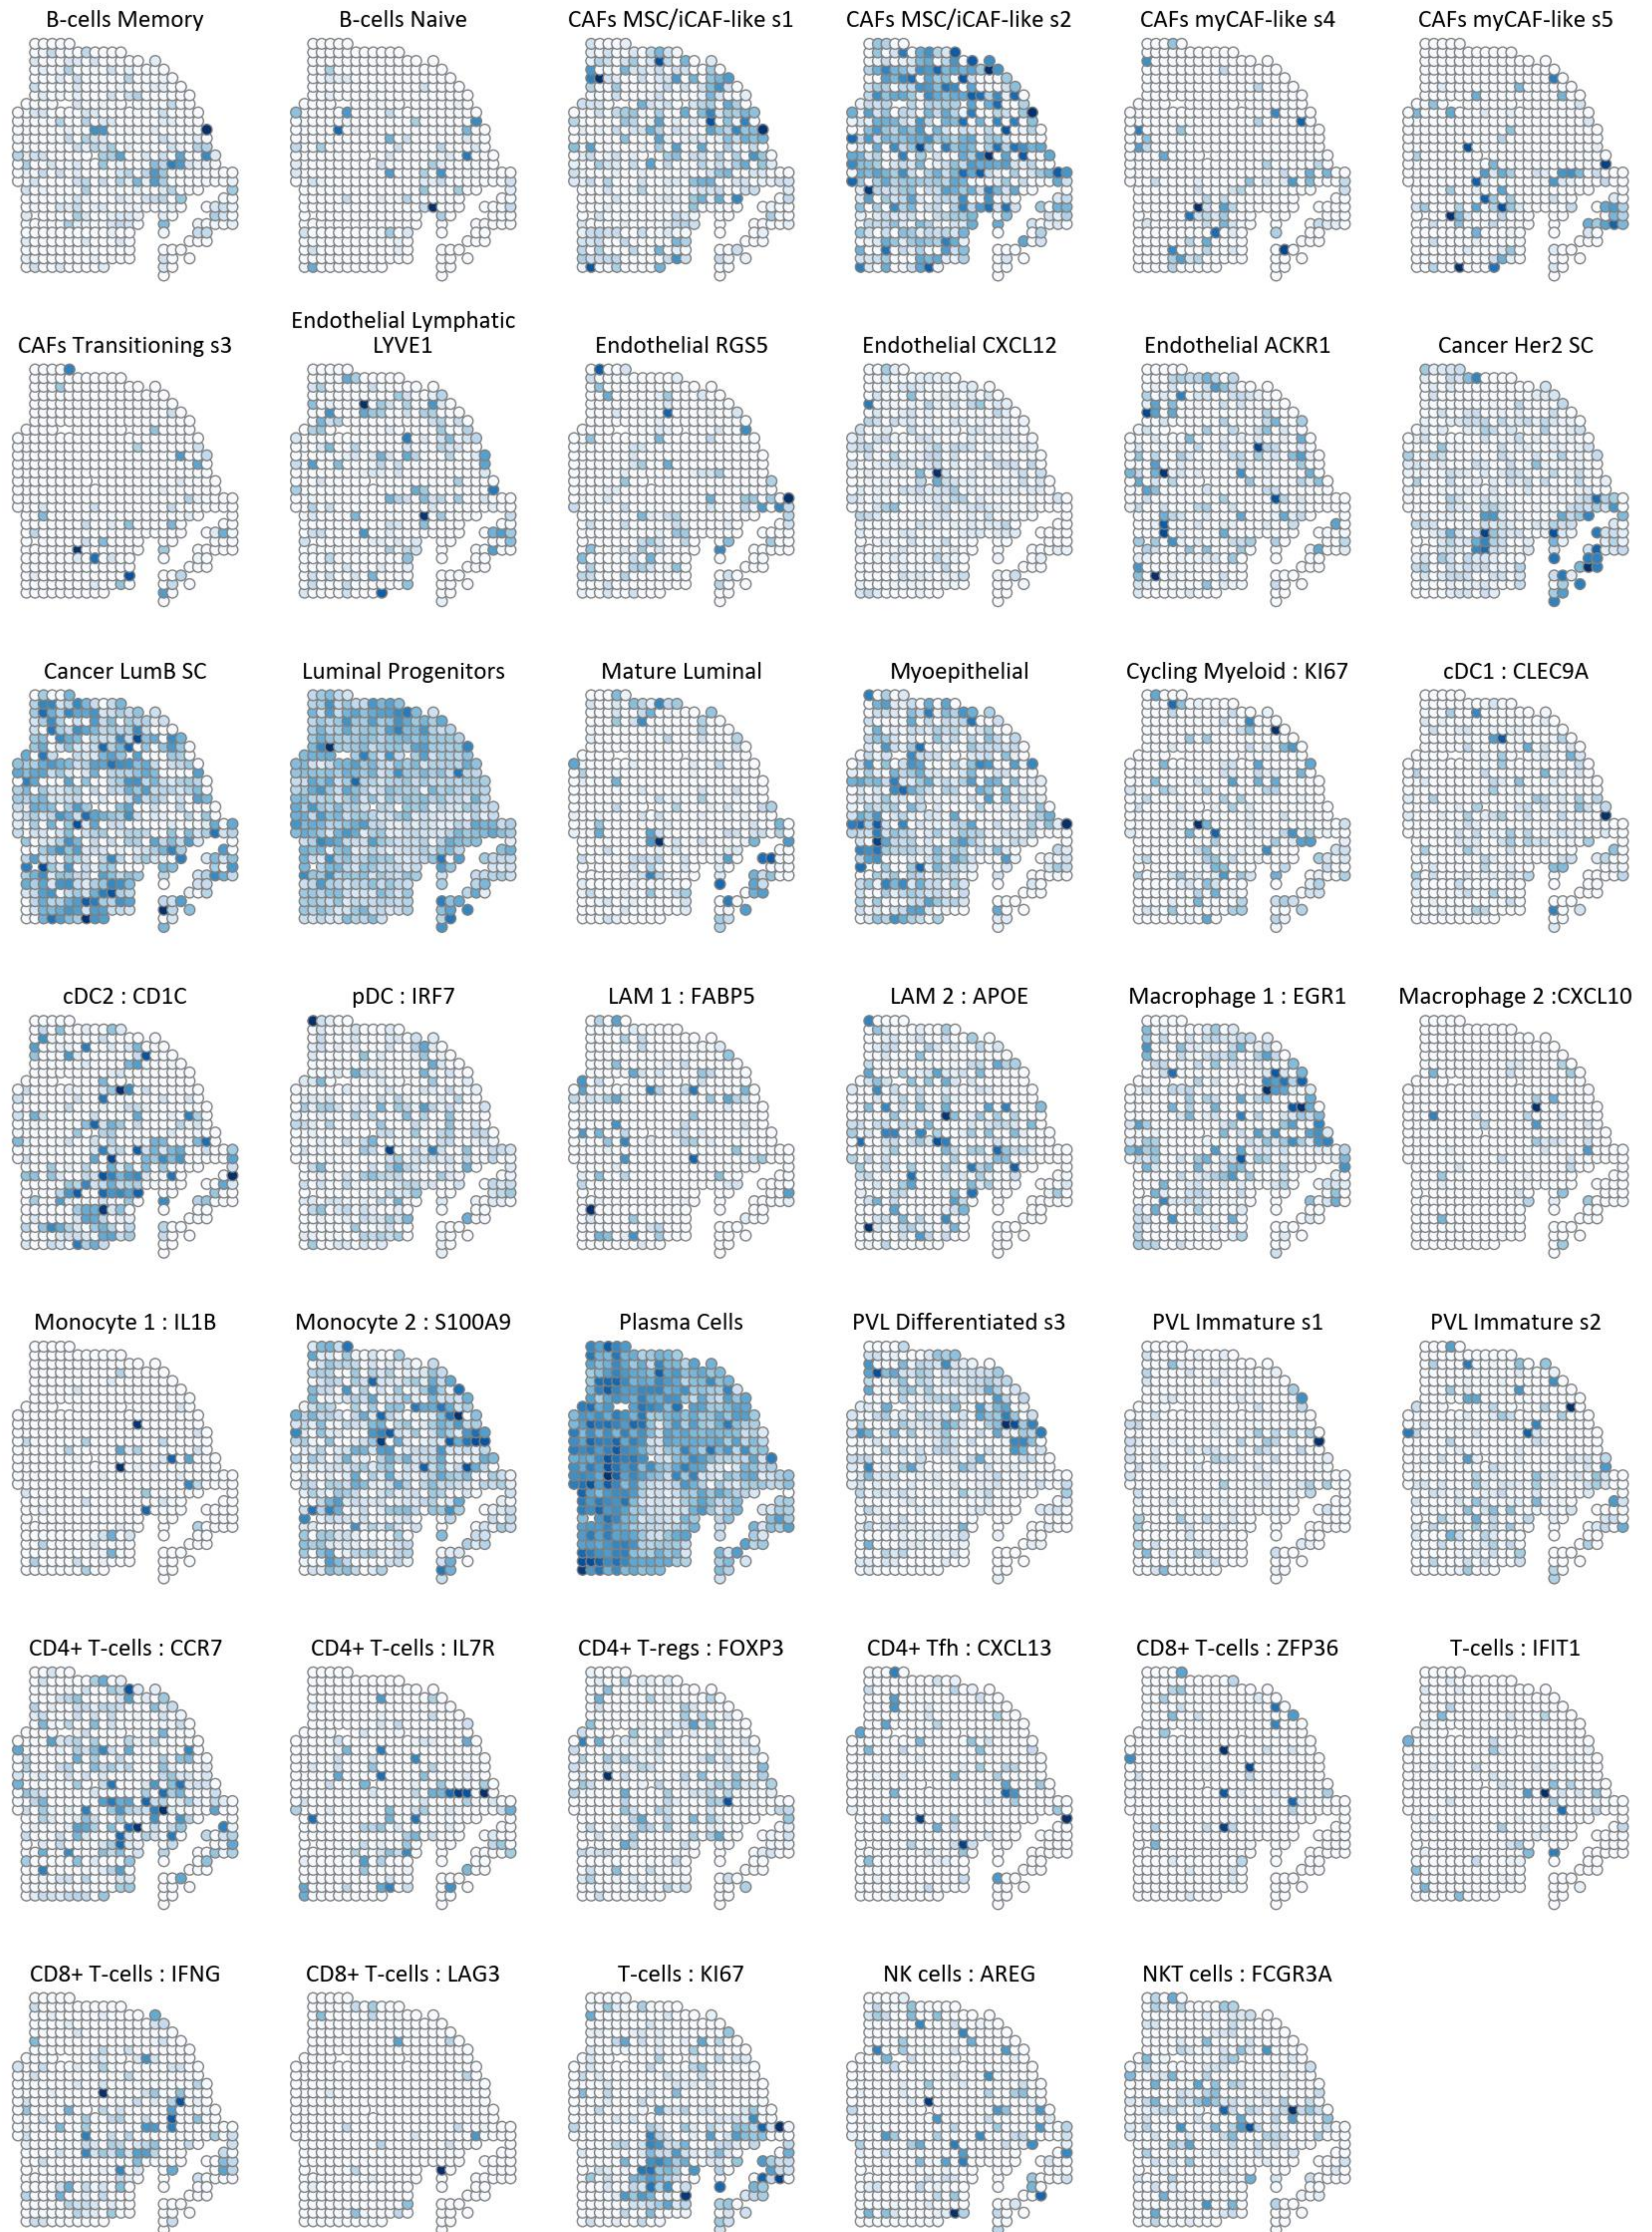

# subset\_D4

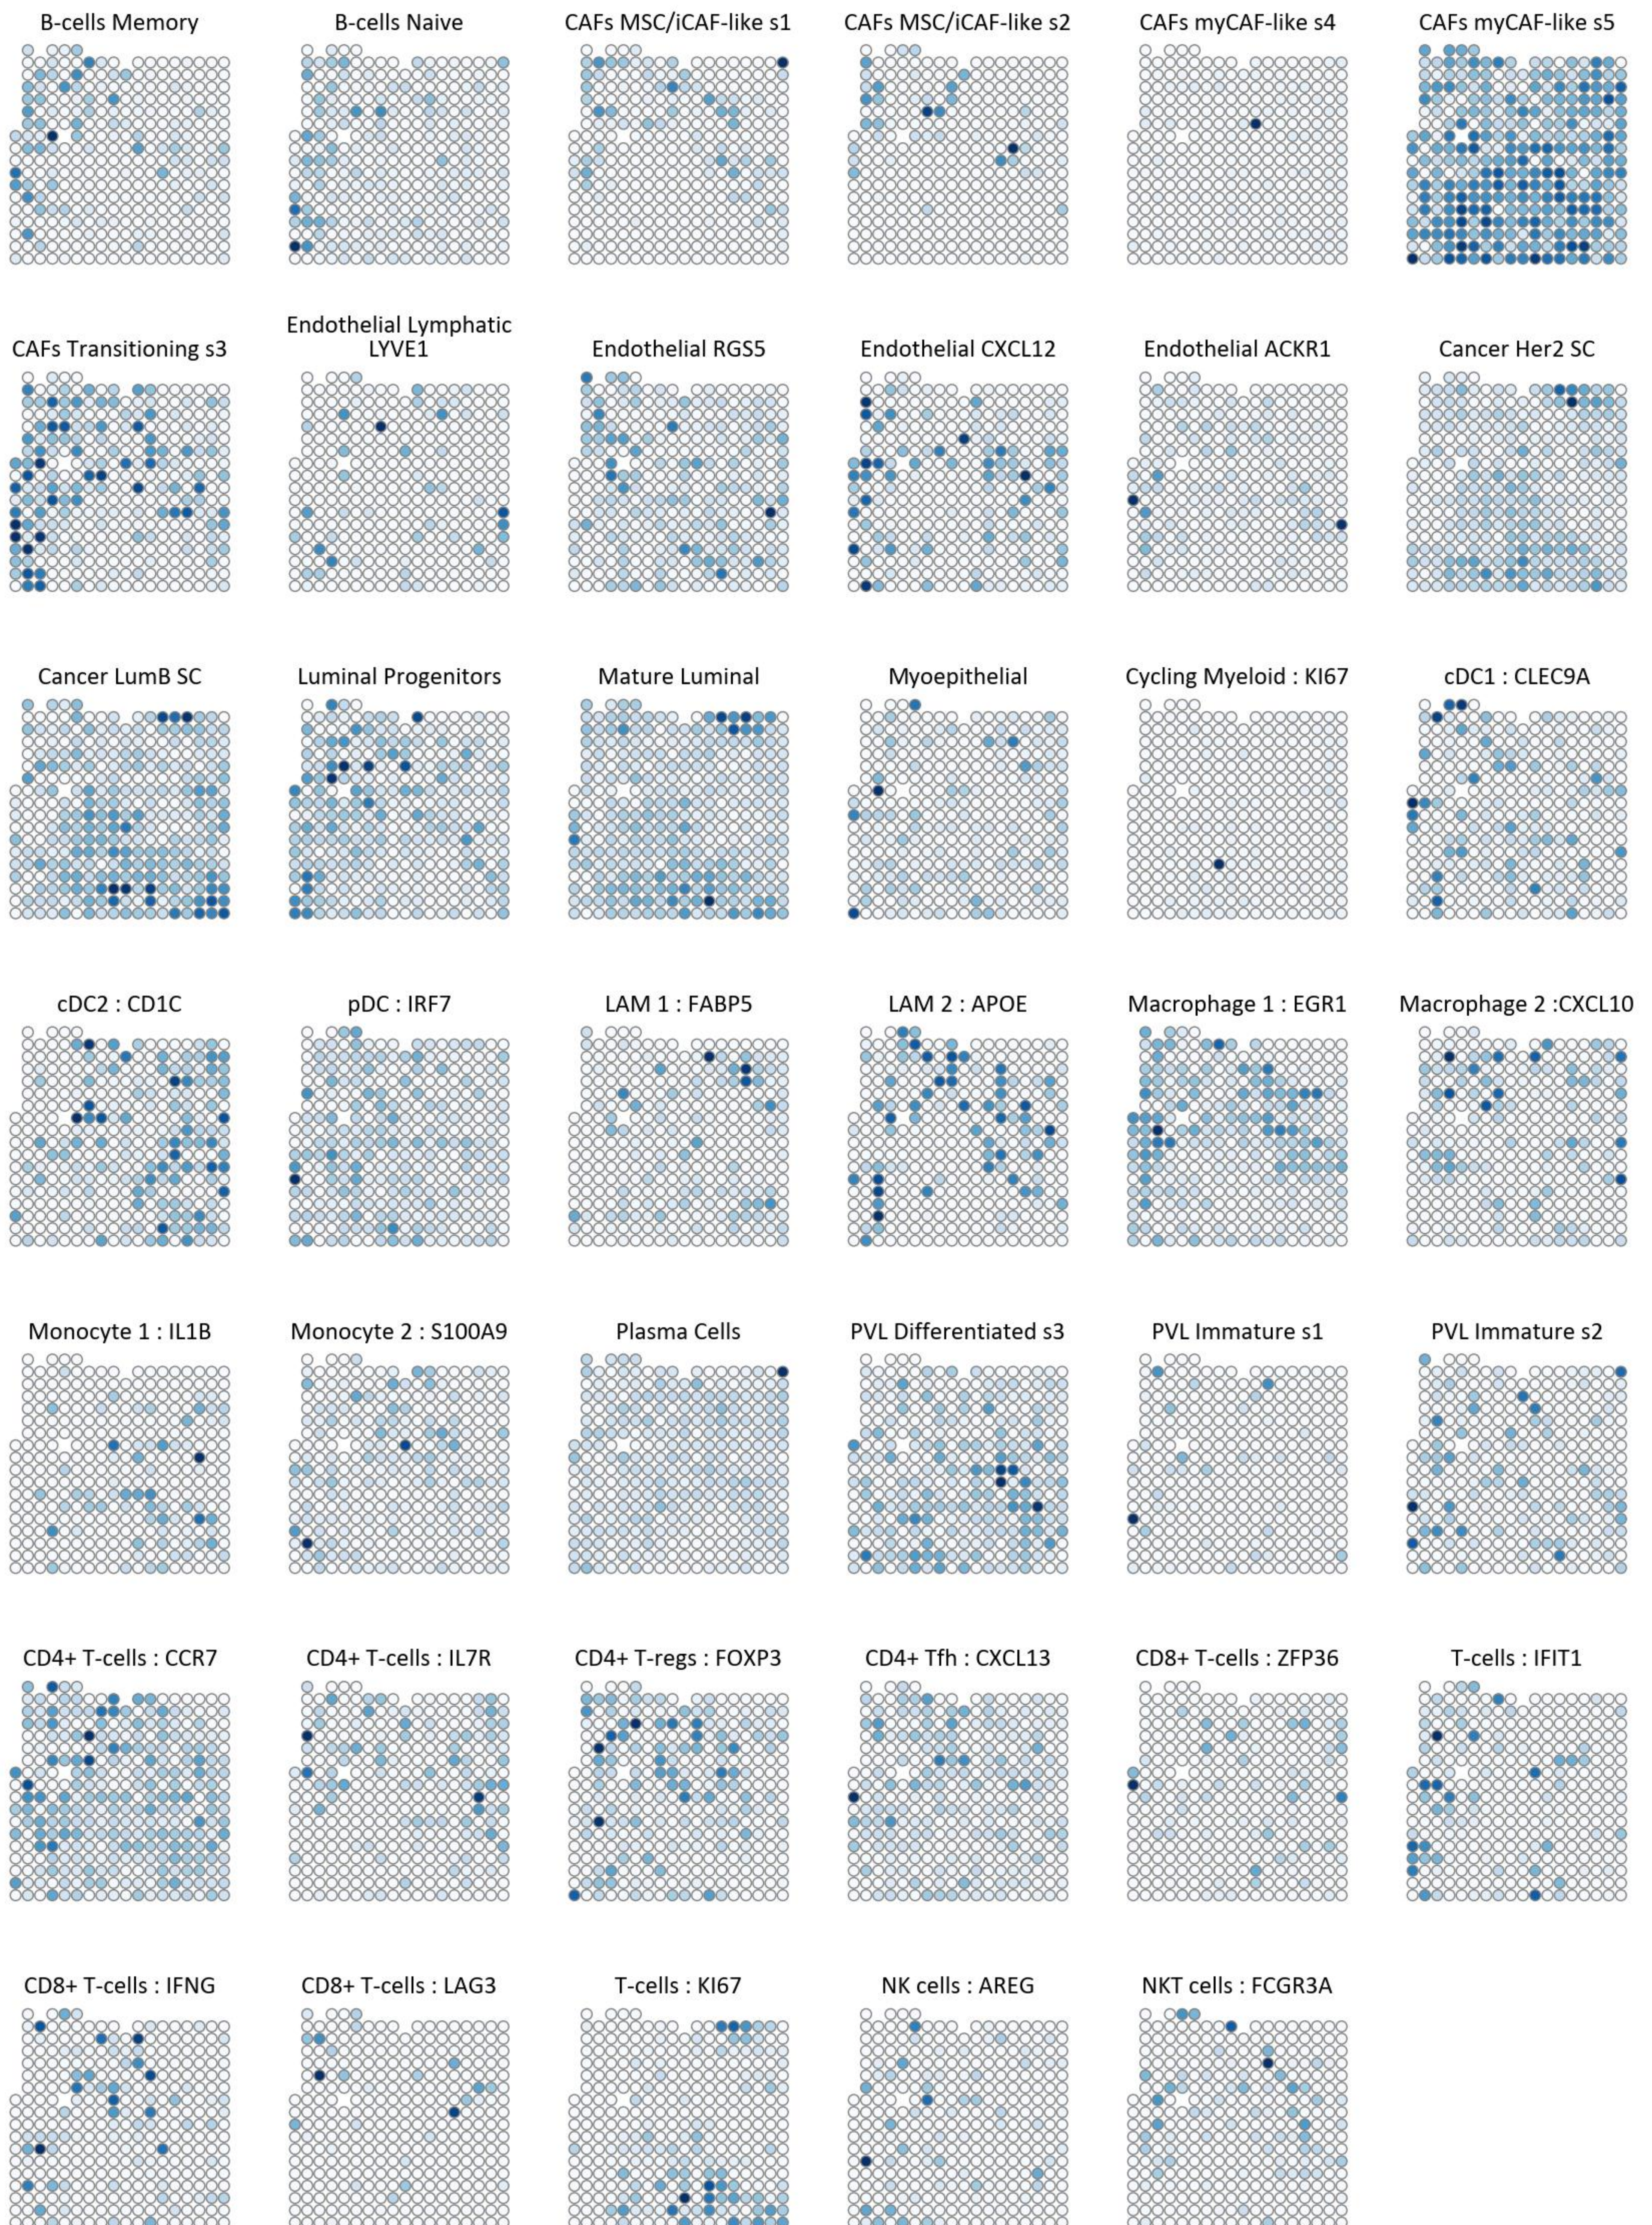

# subset\_B2

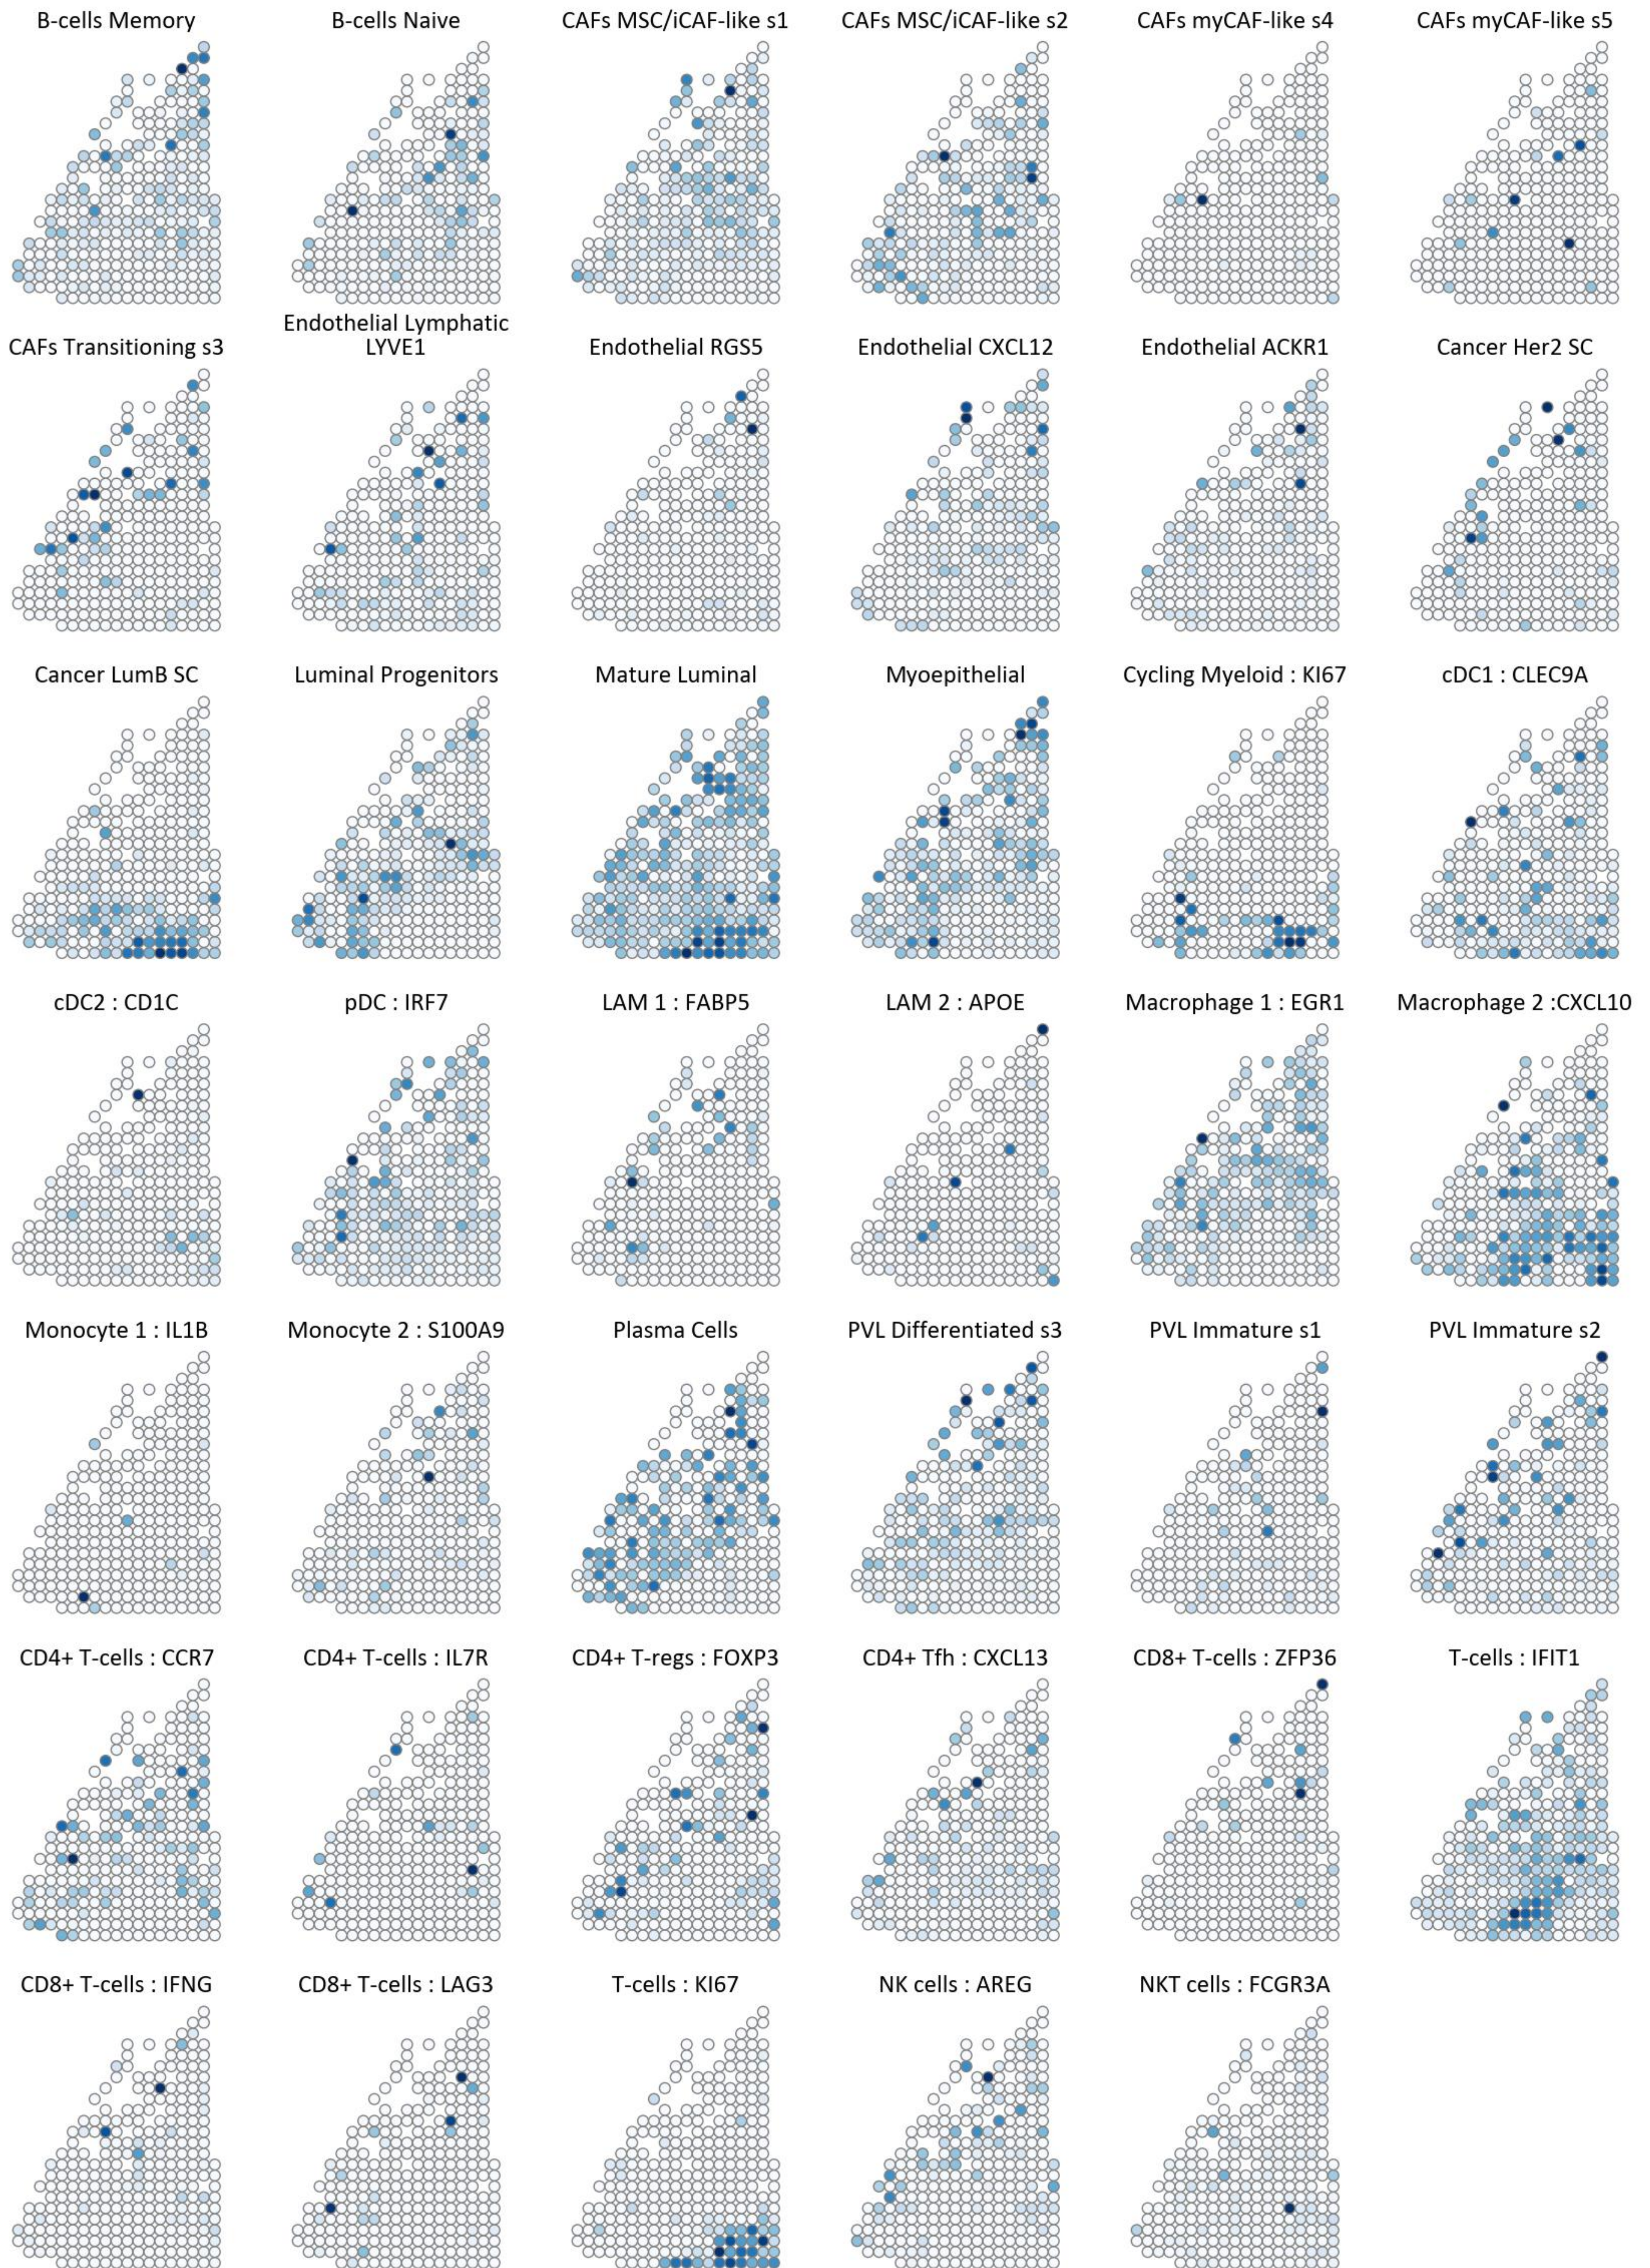

# subset\_A6

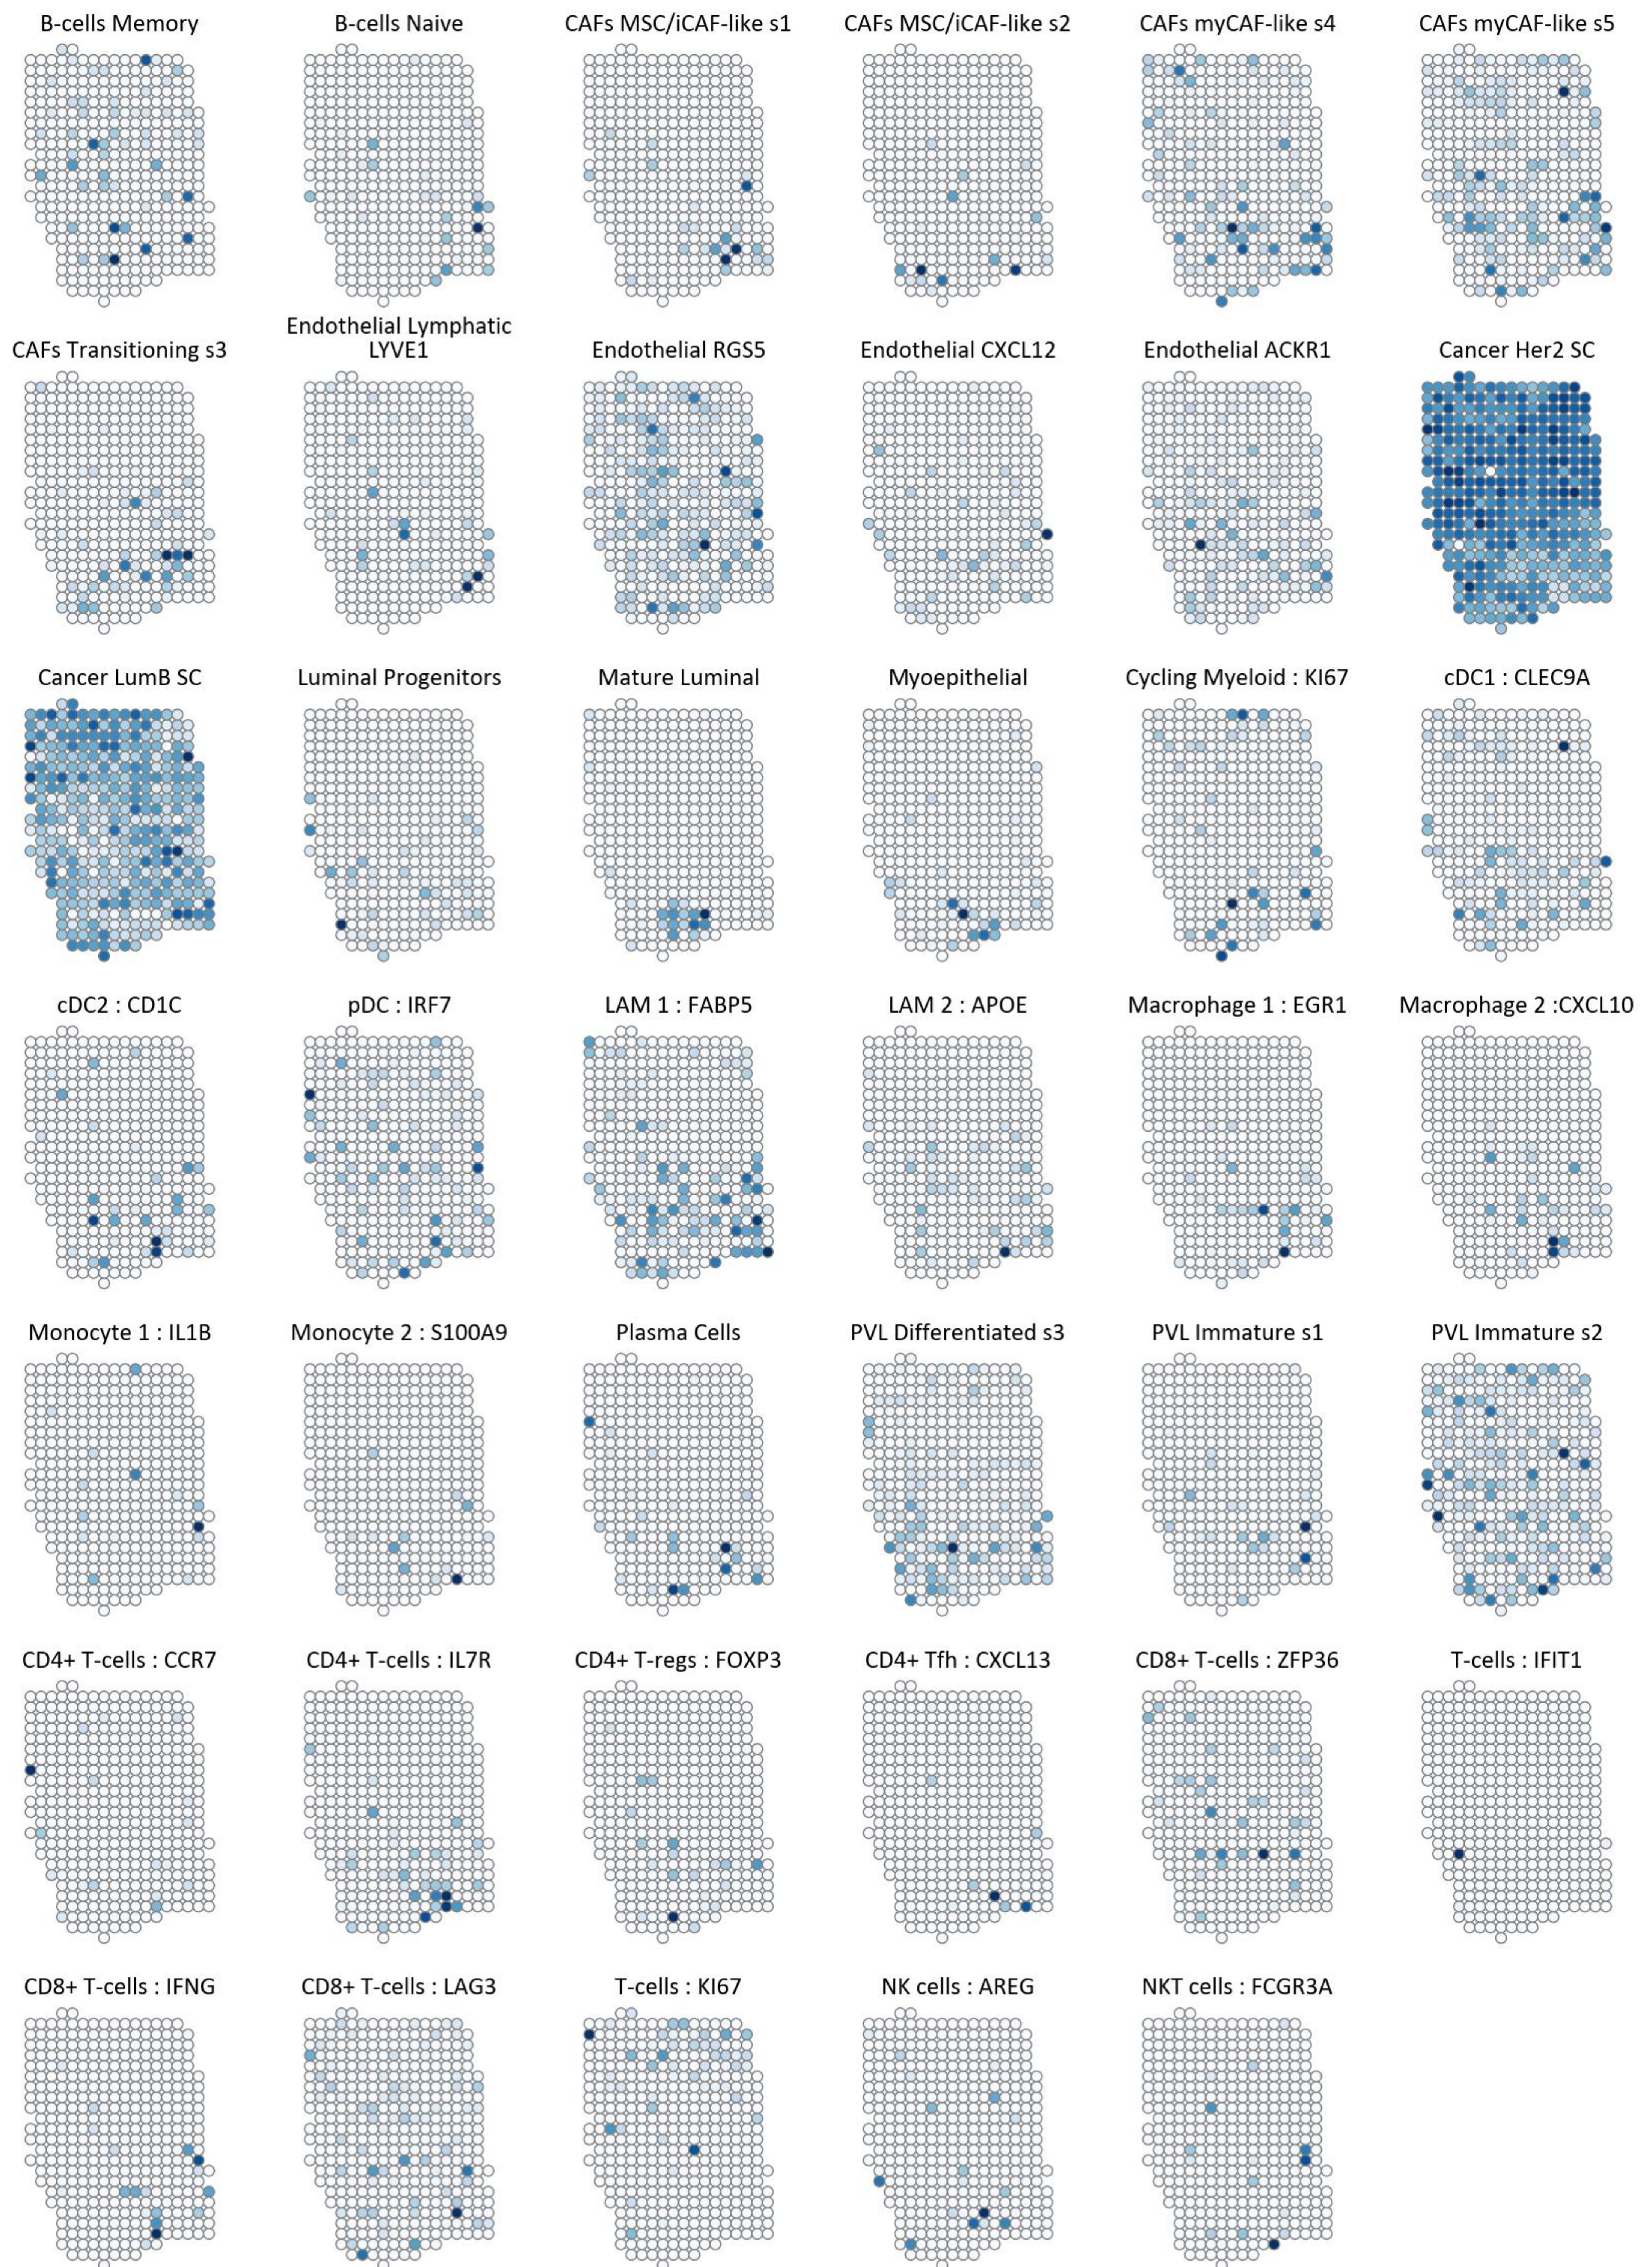

# subset\_F3

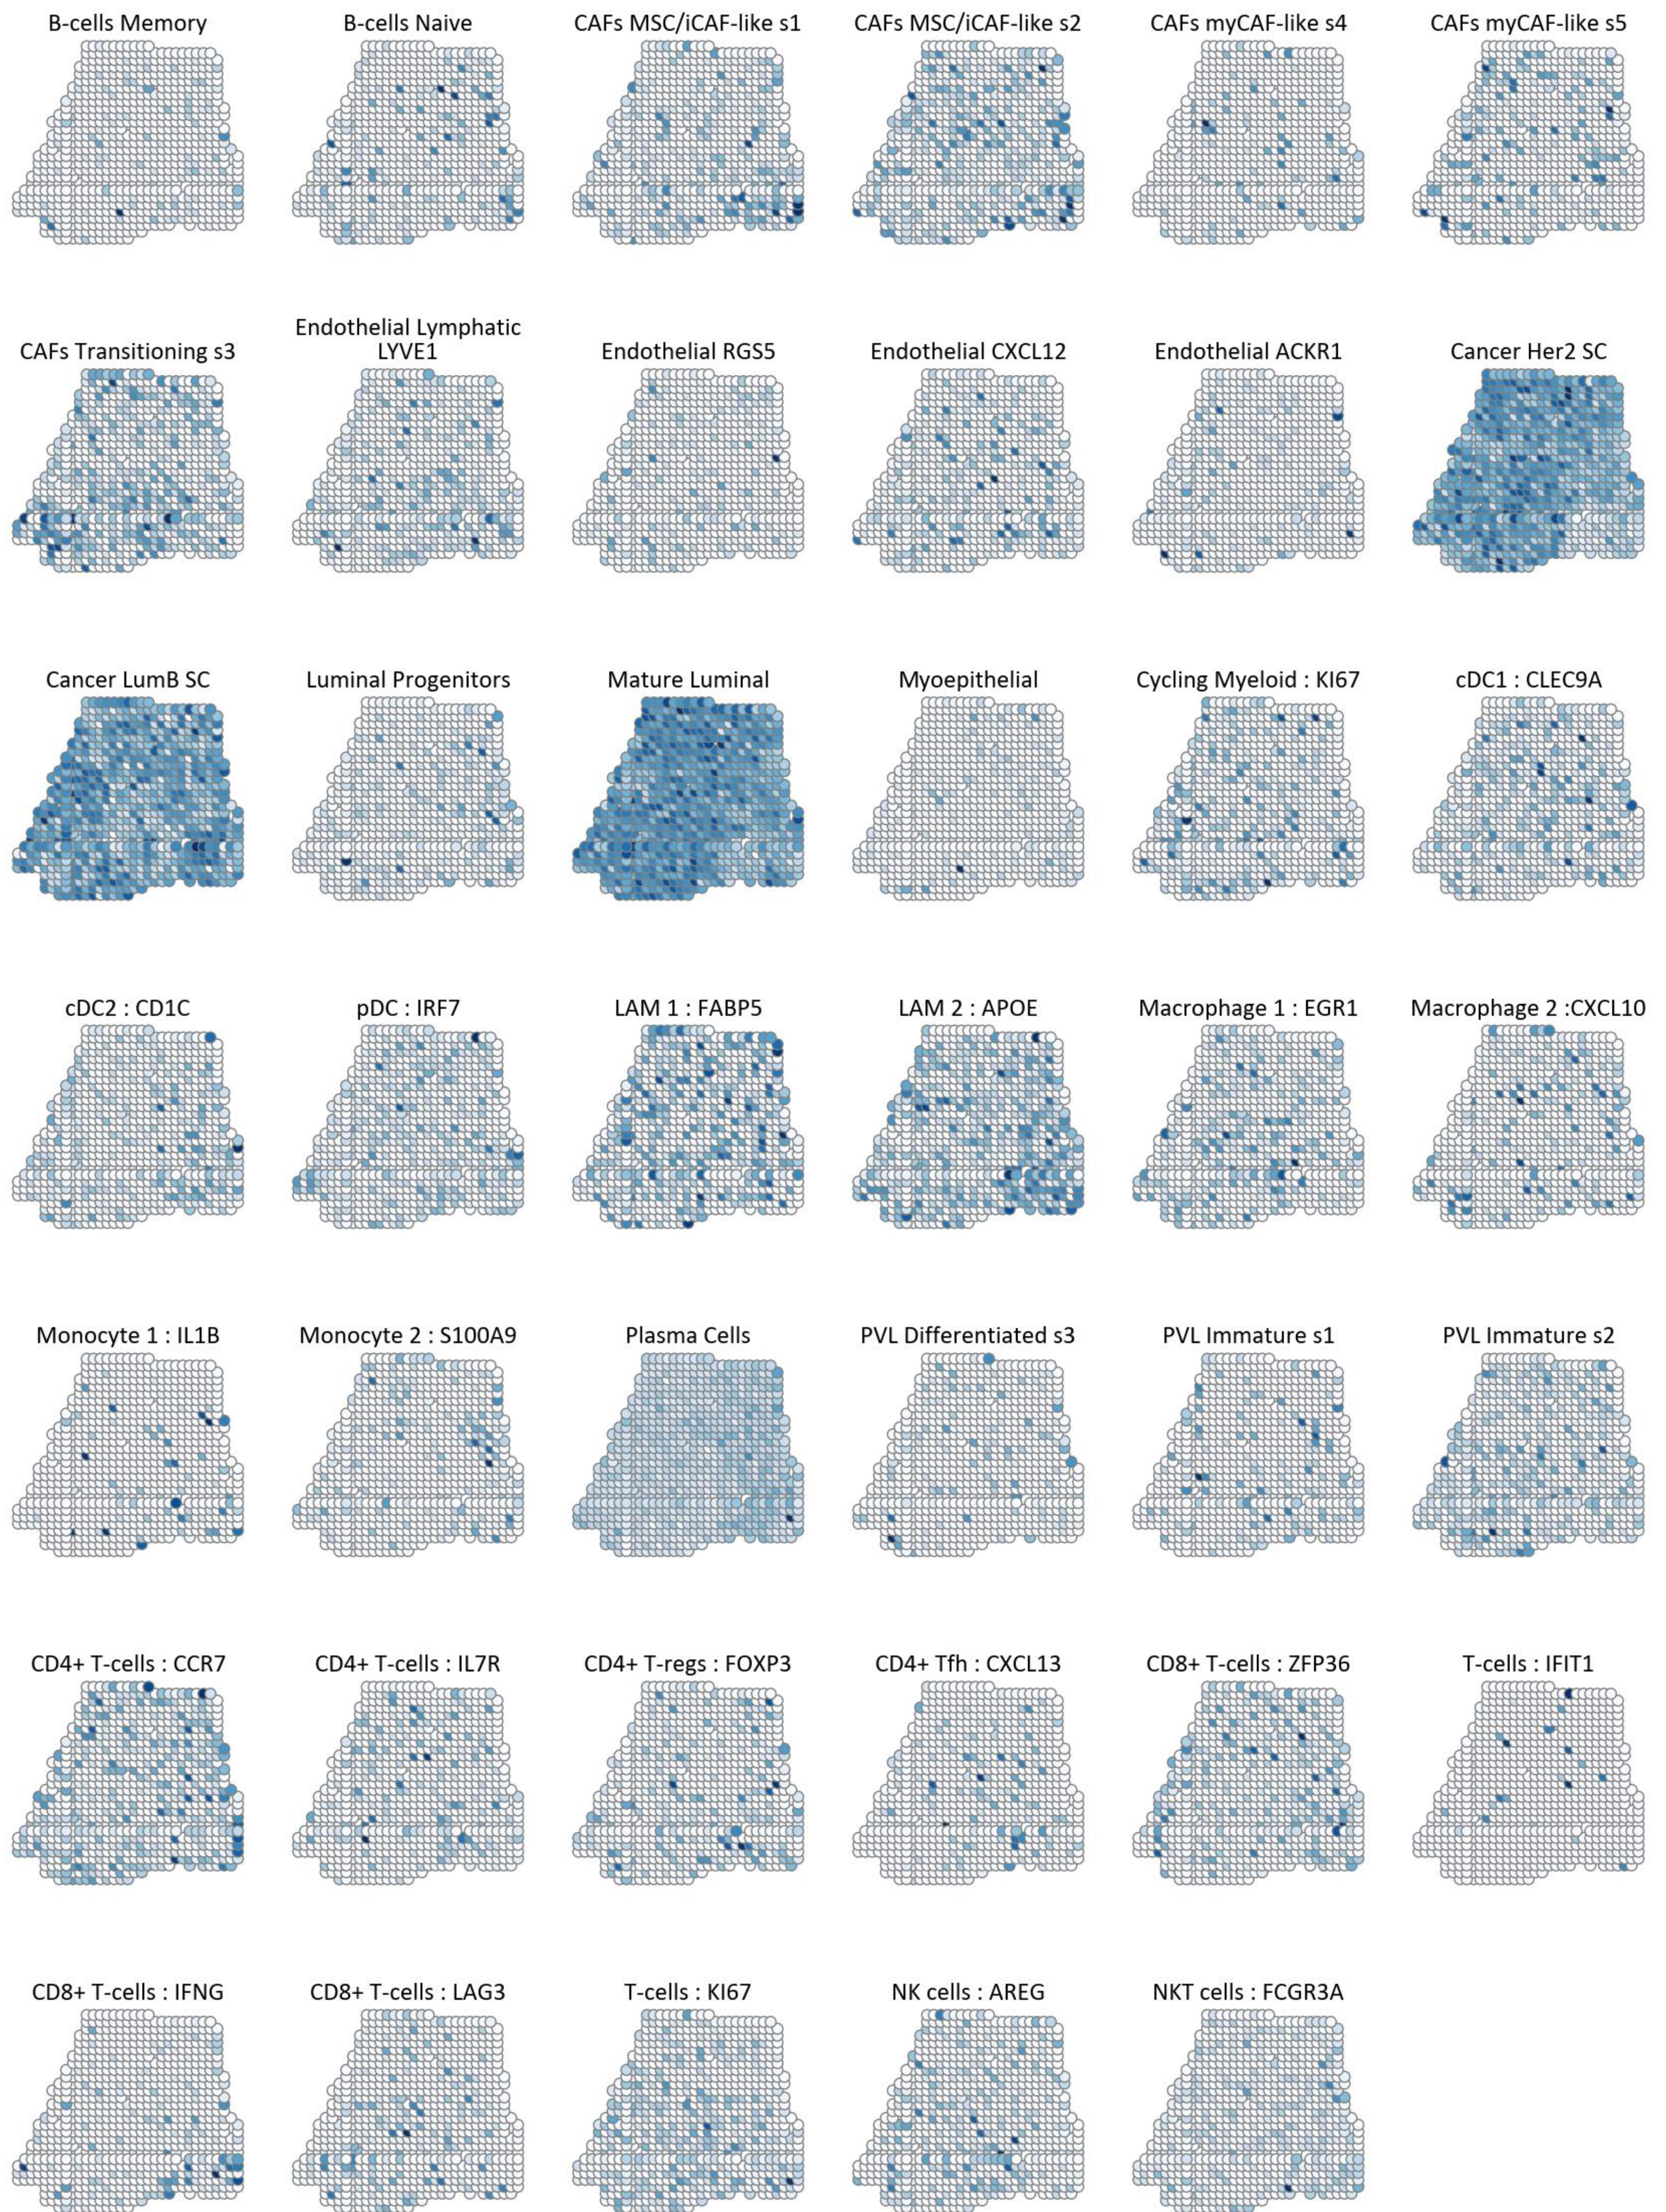

# subset\_A3

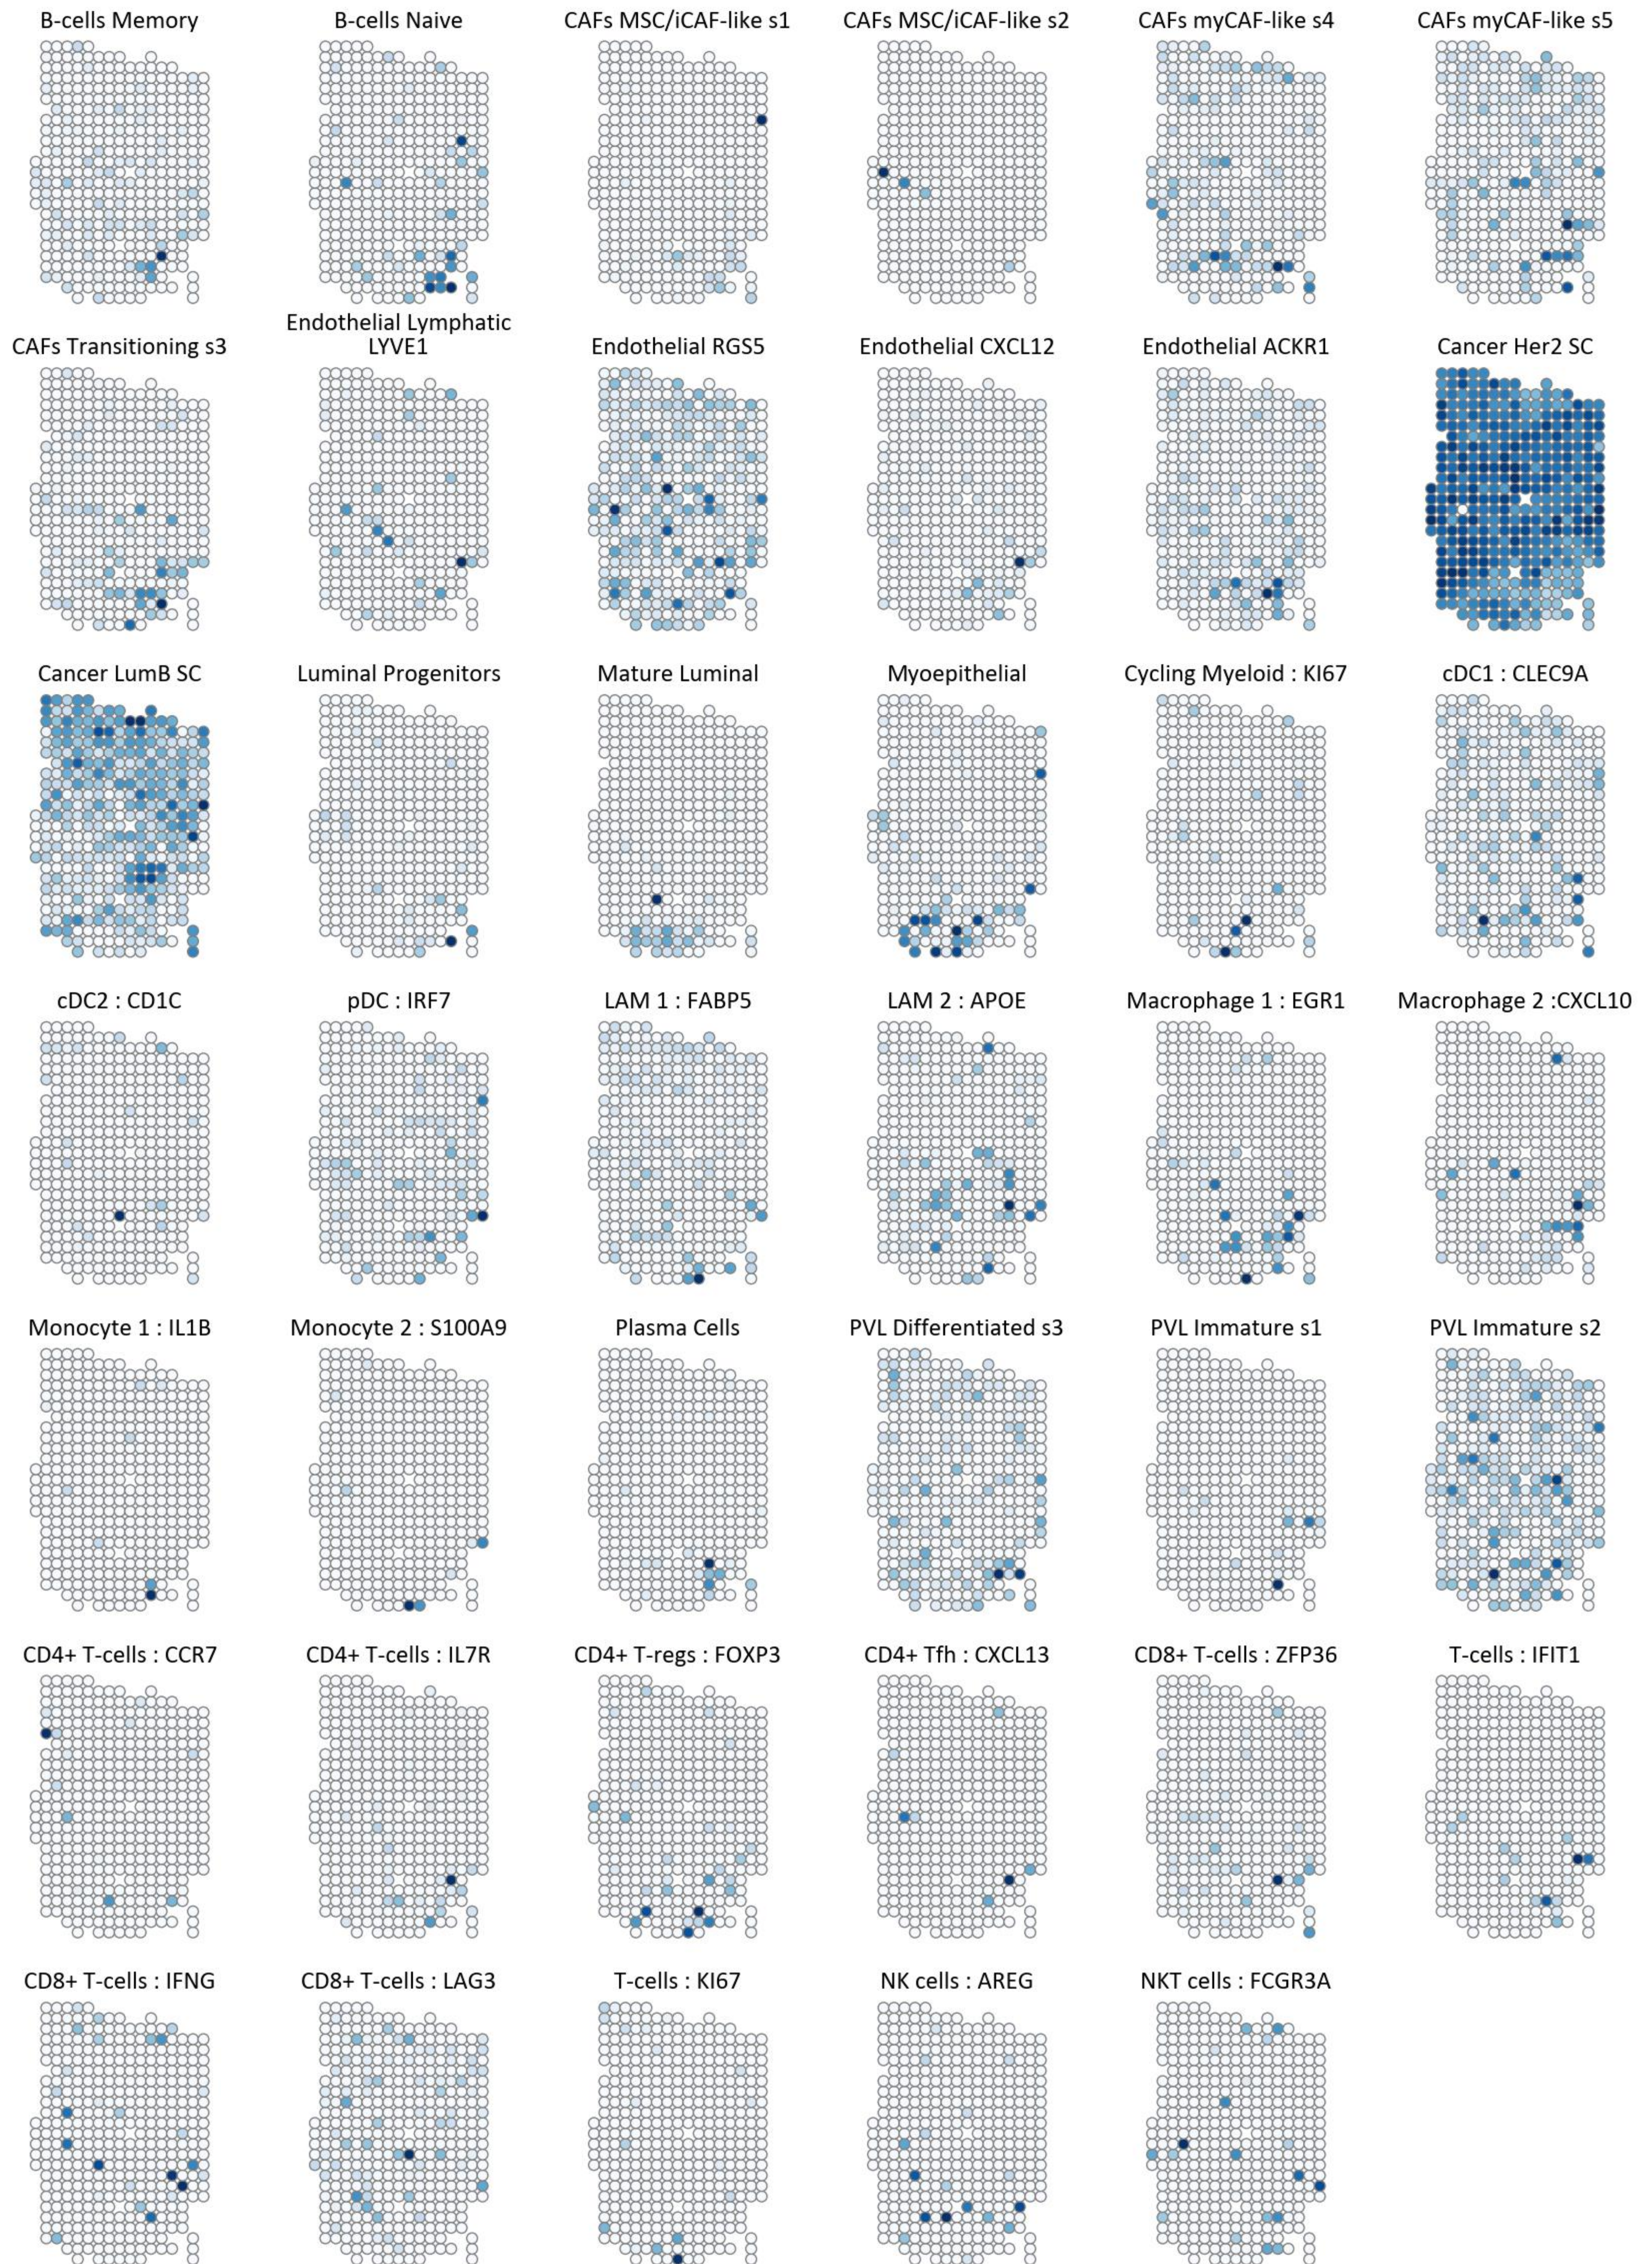

# subset\_D5

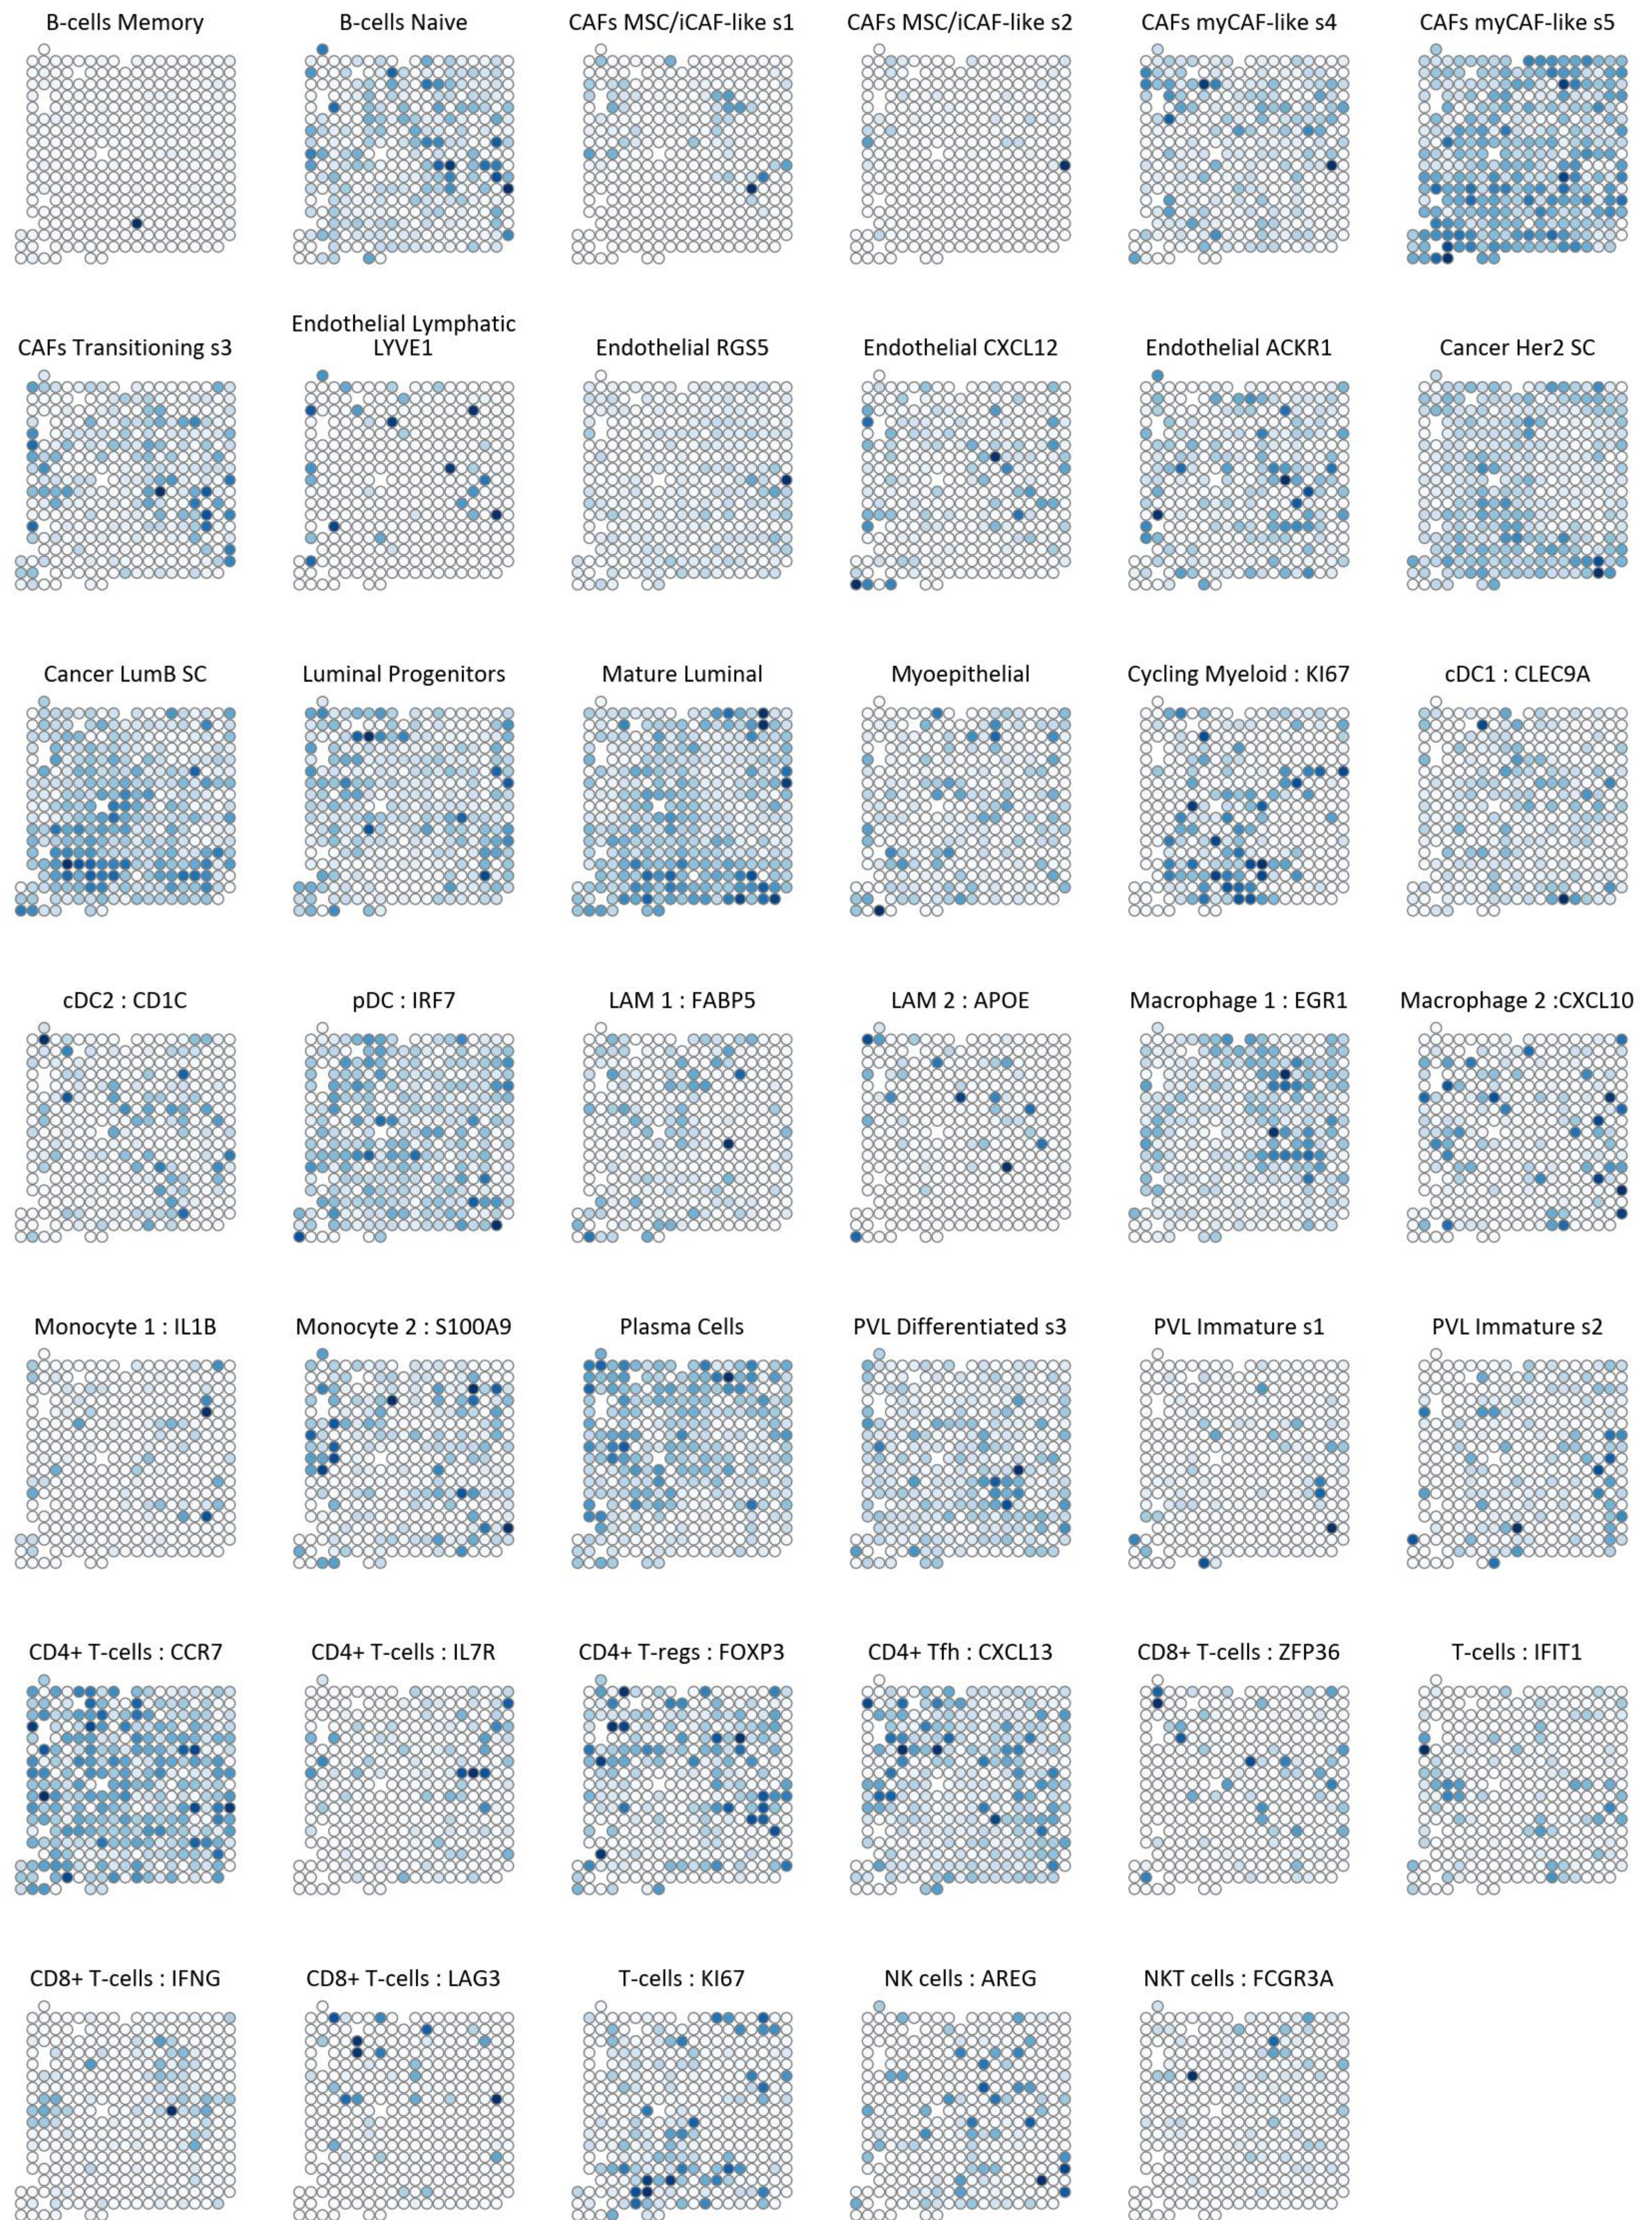

# subset\_F2

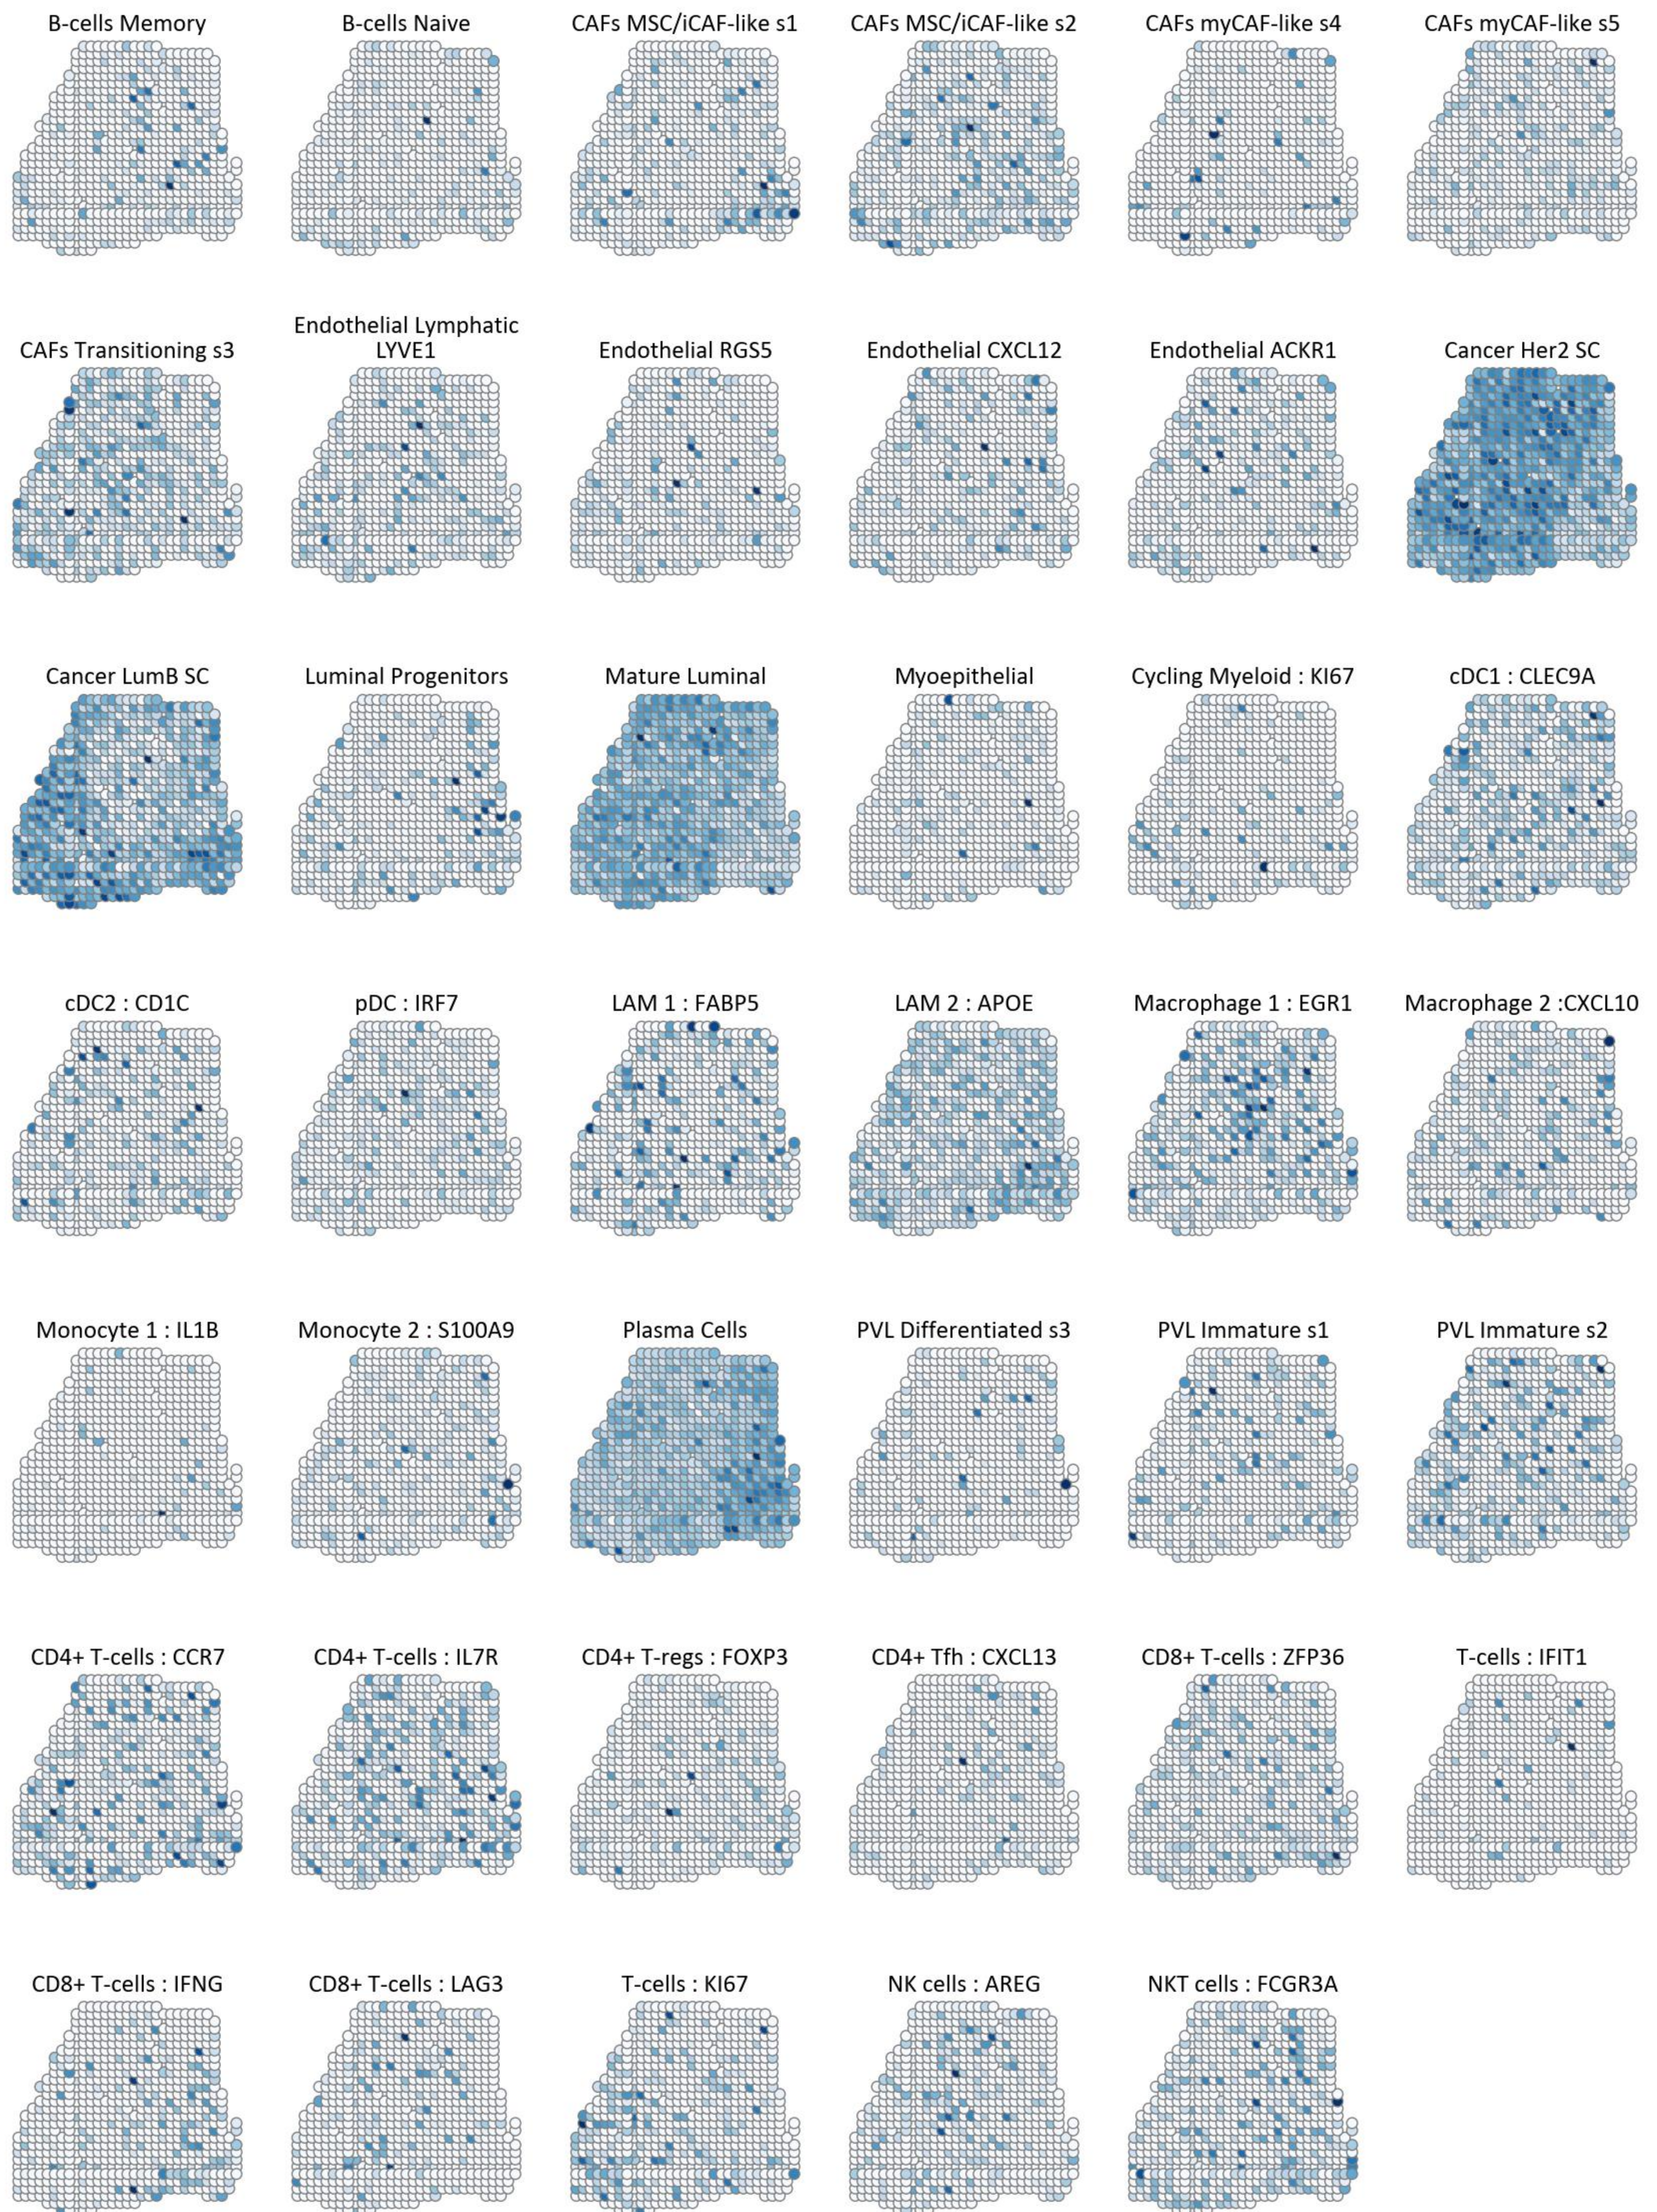



# subset\_G3

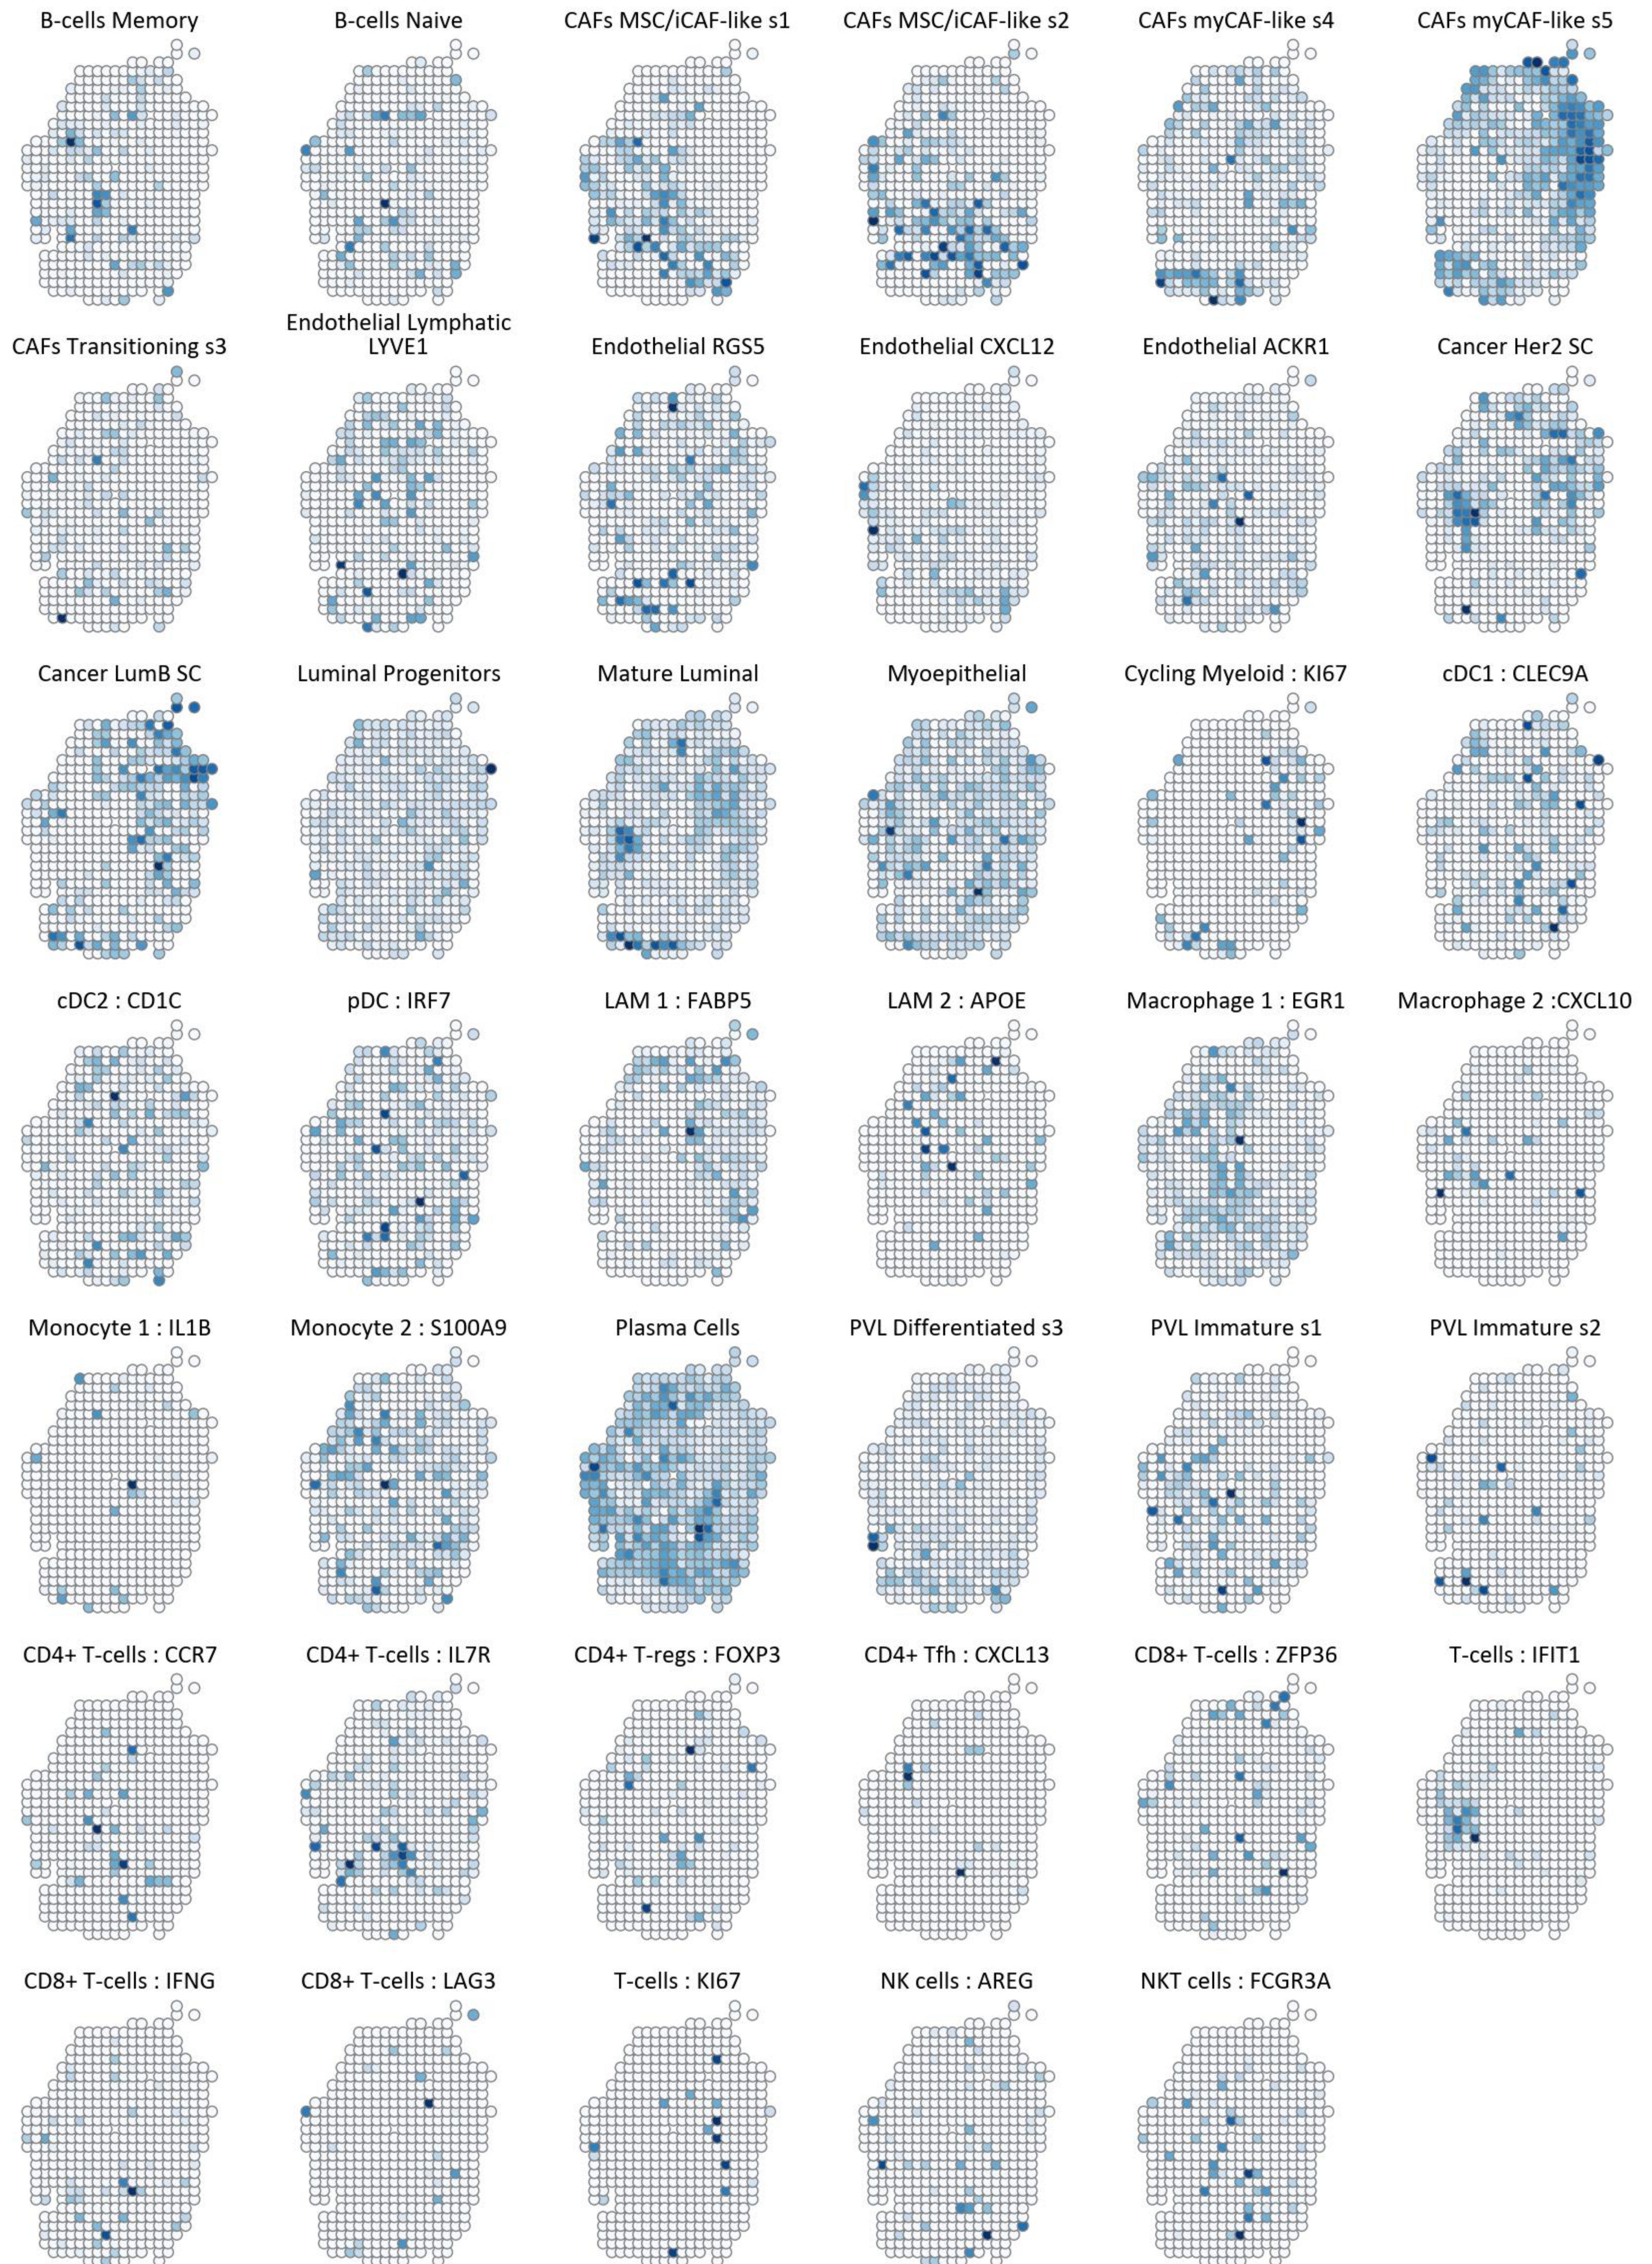

# subset\_B3

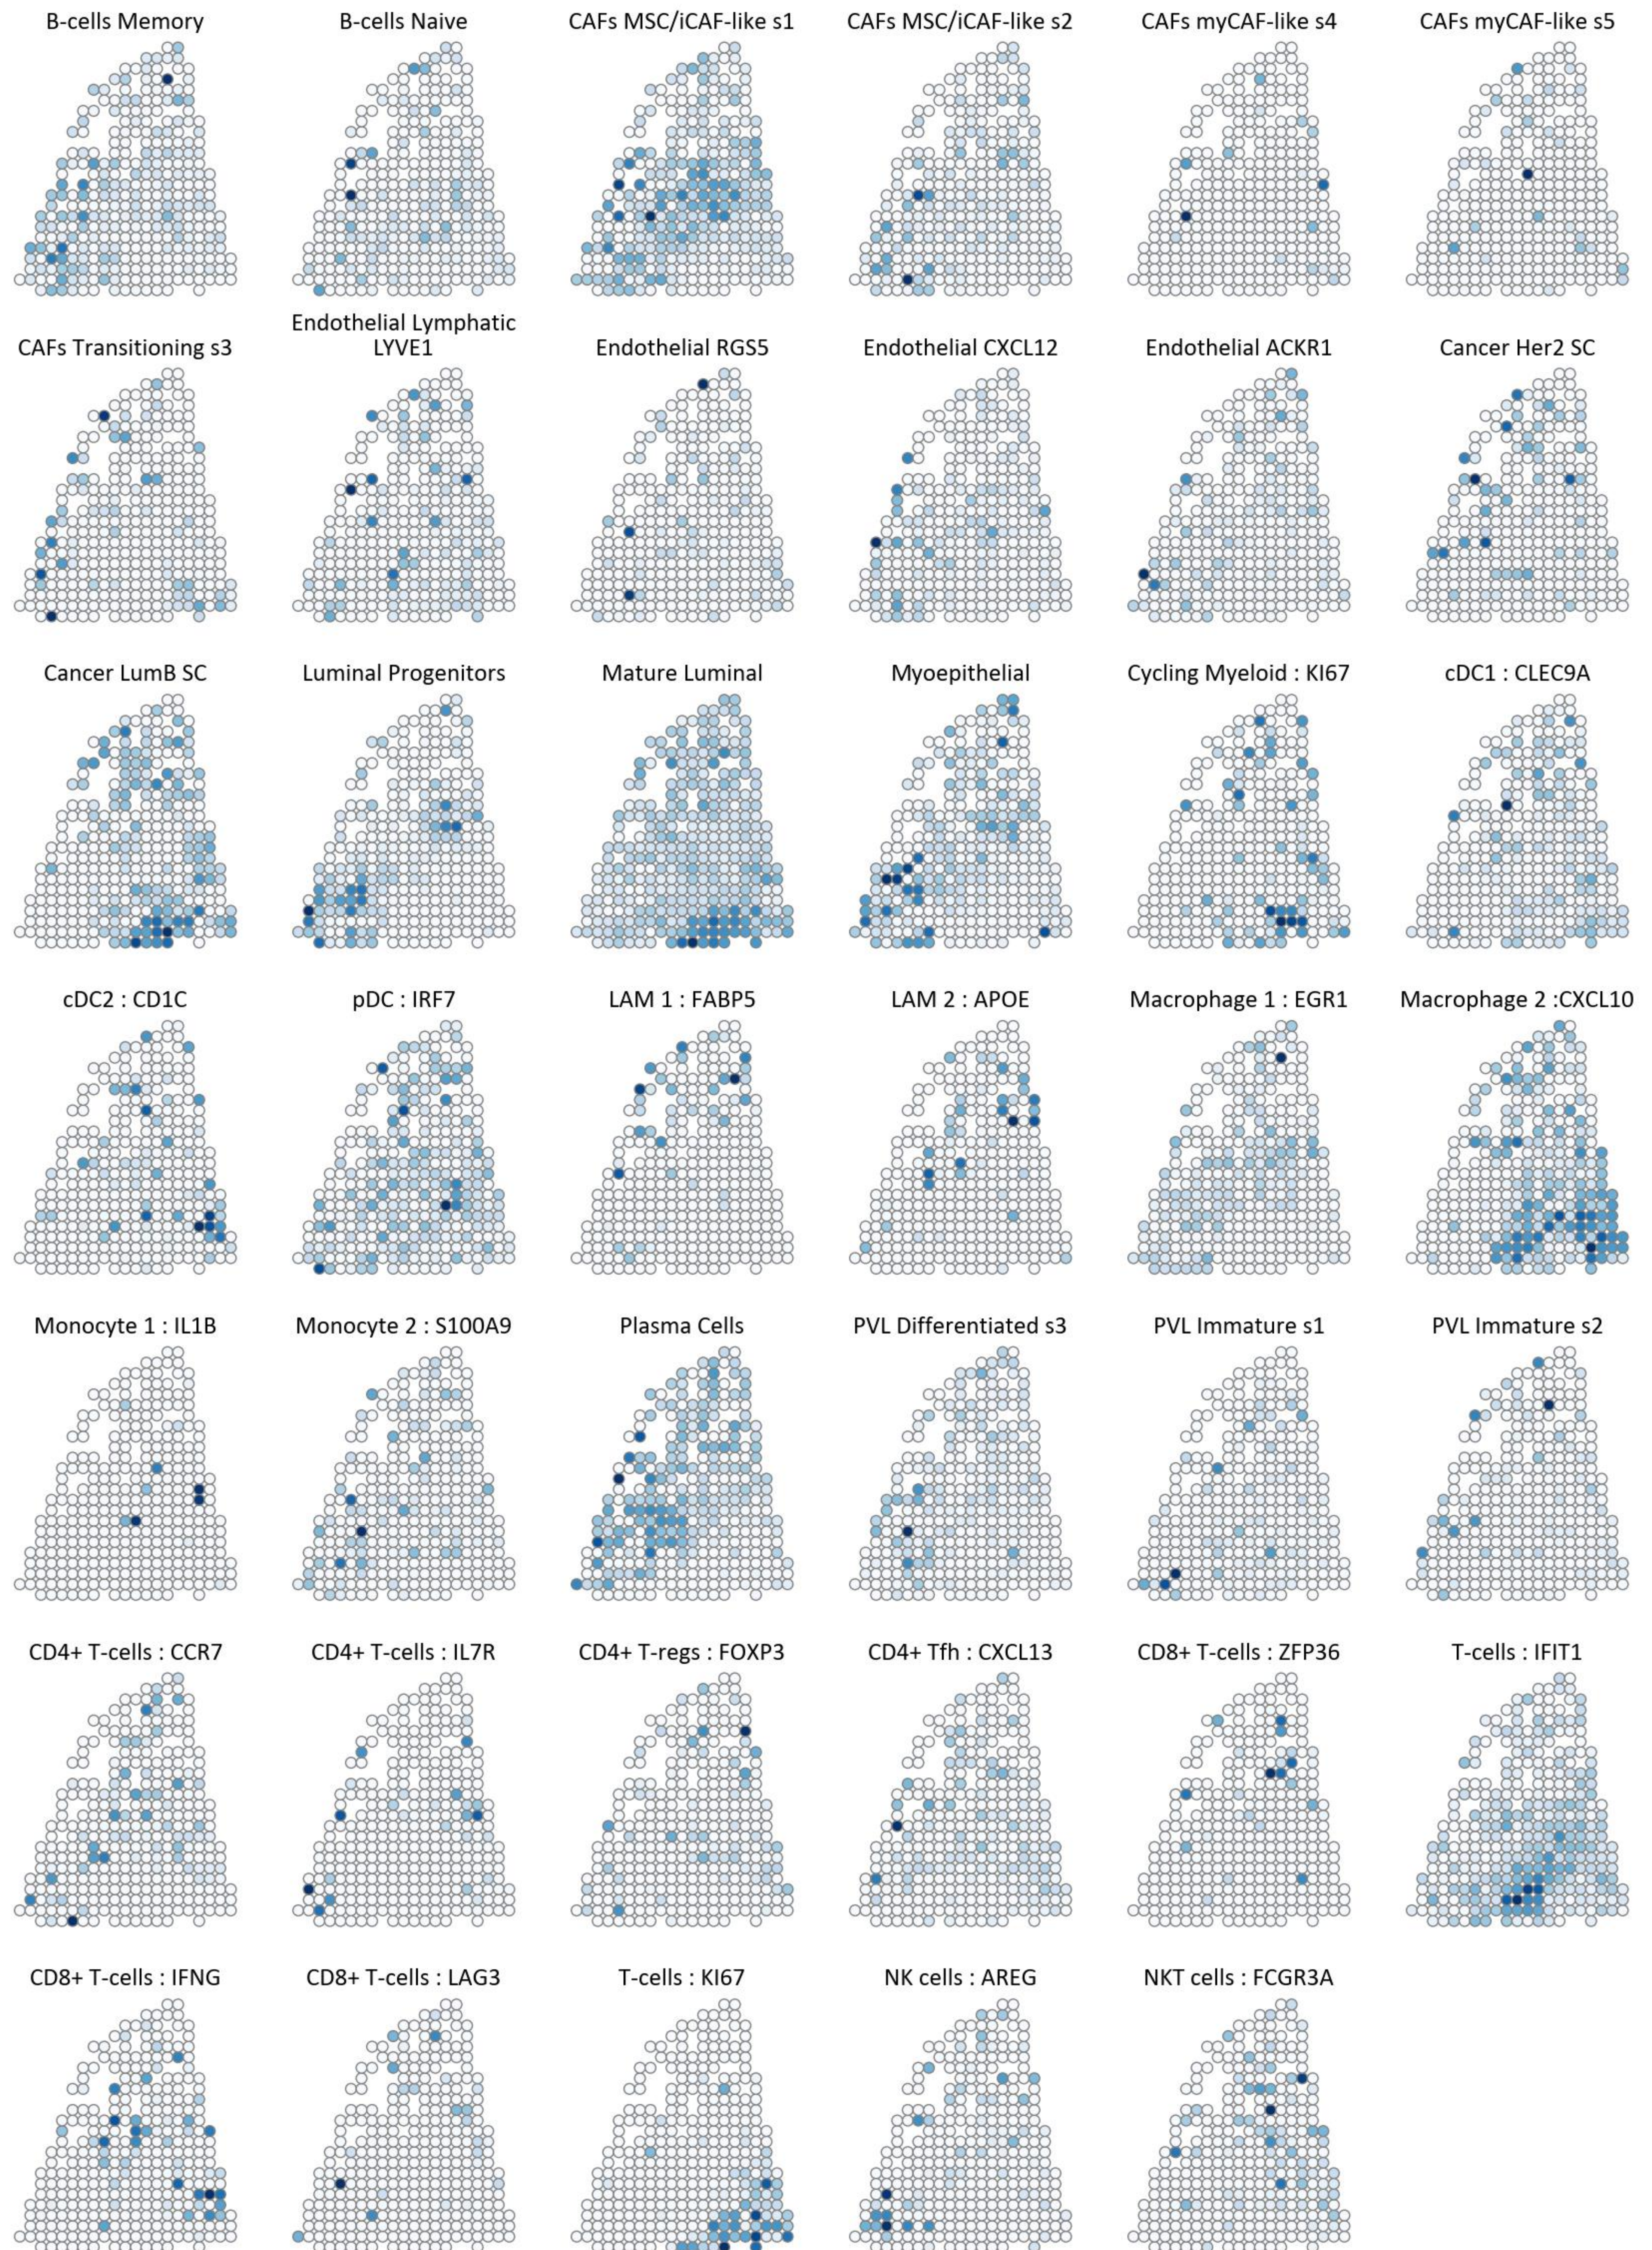

# subset\_B6

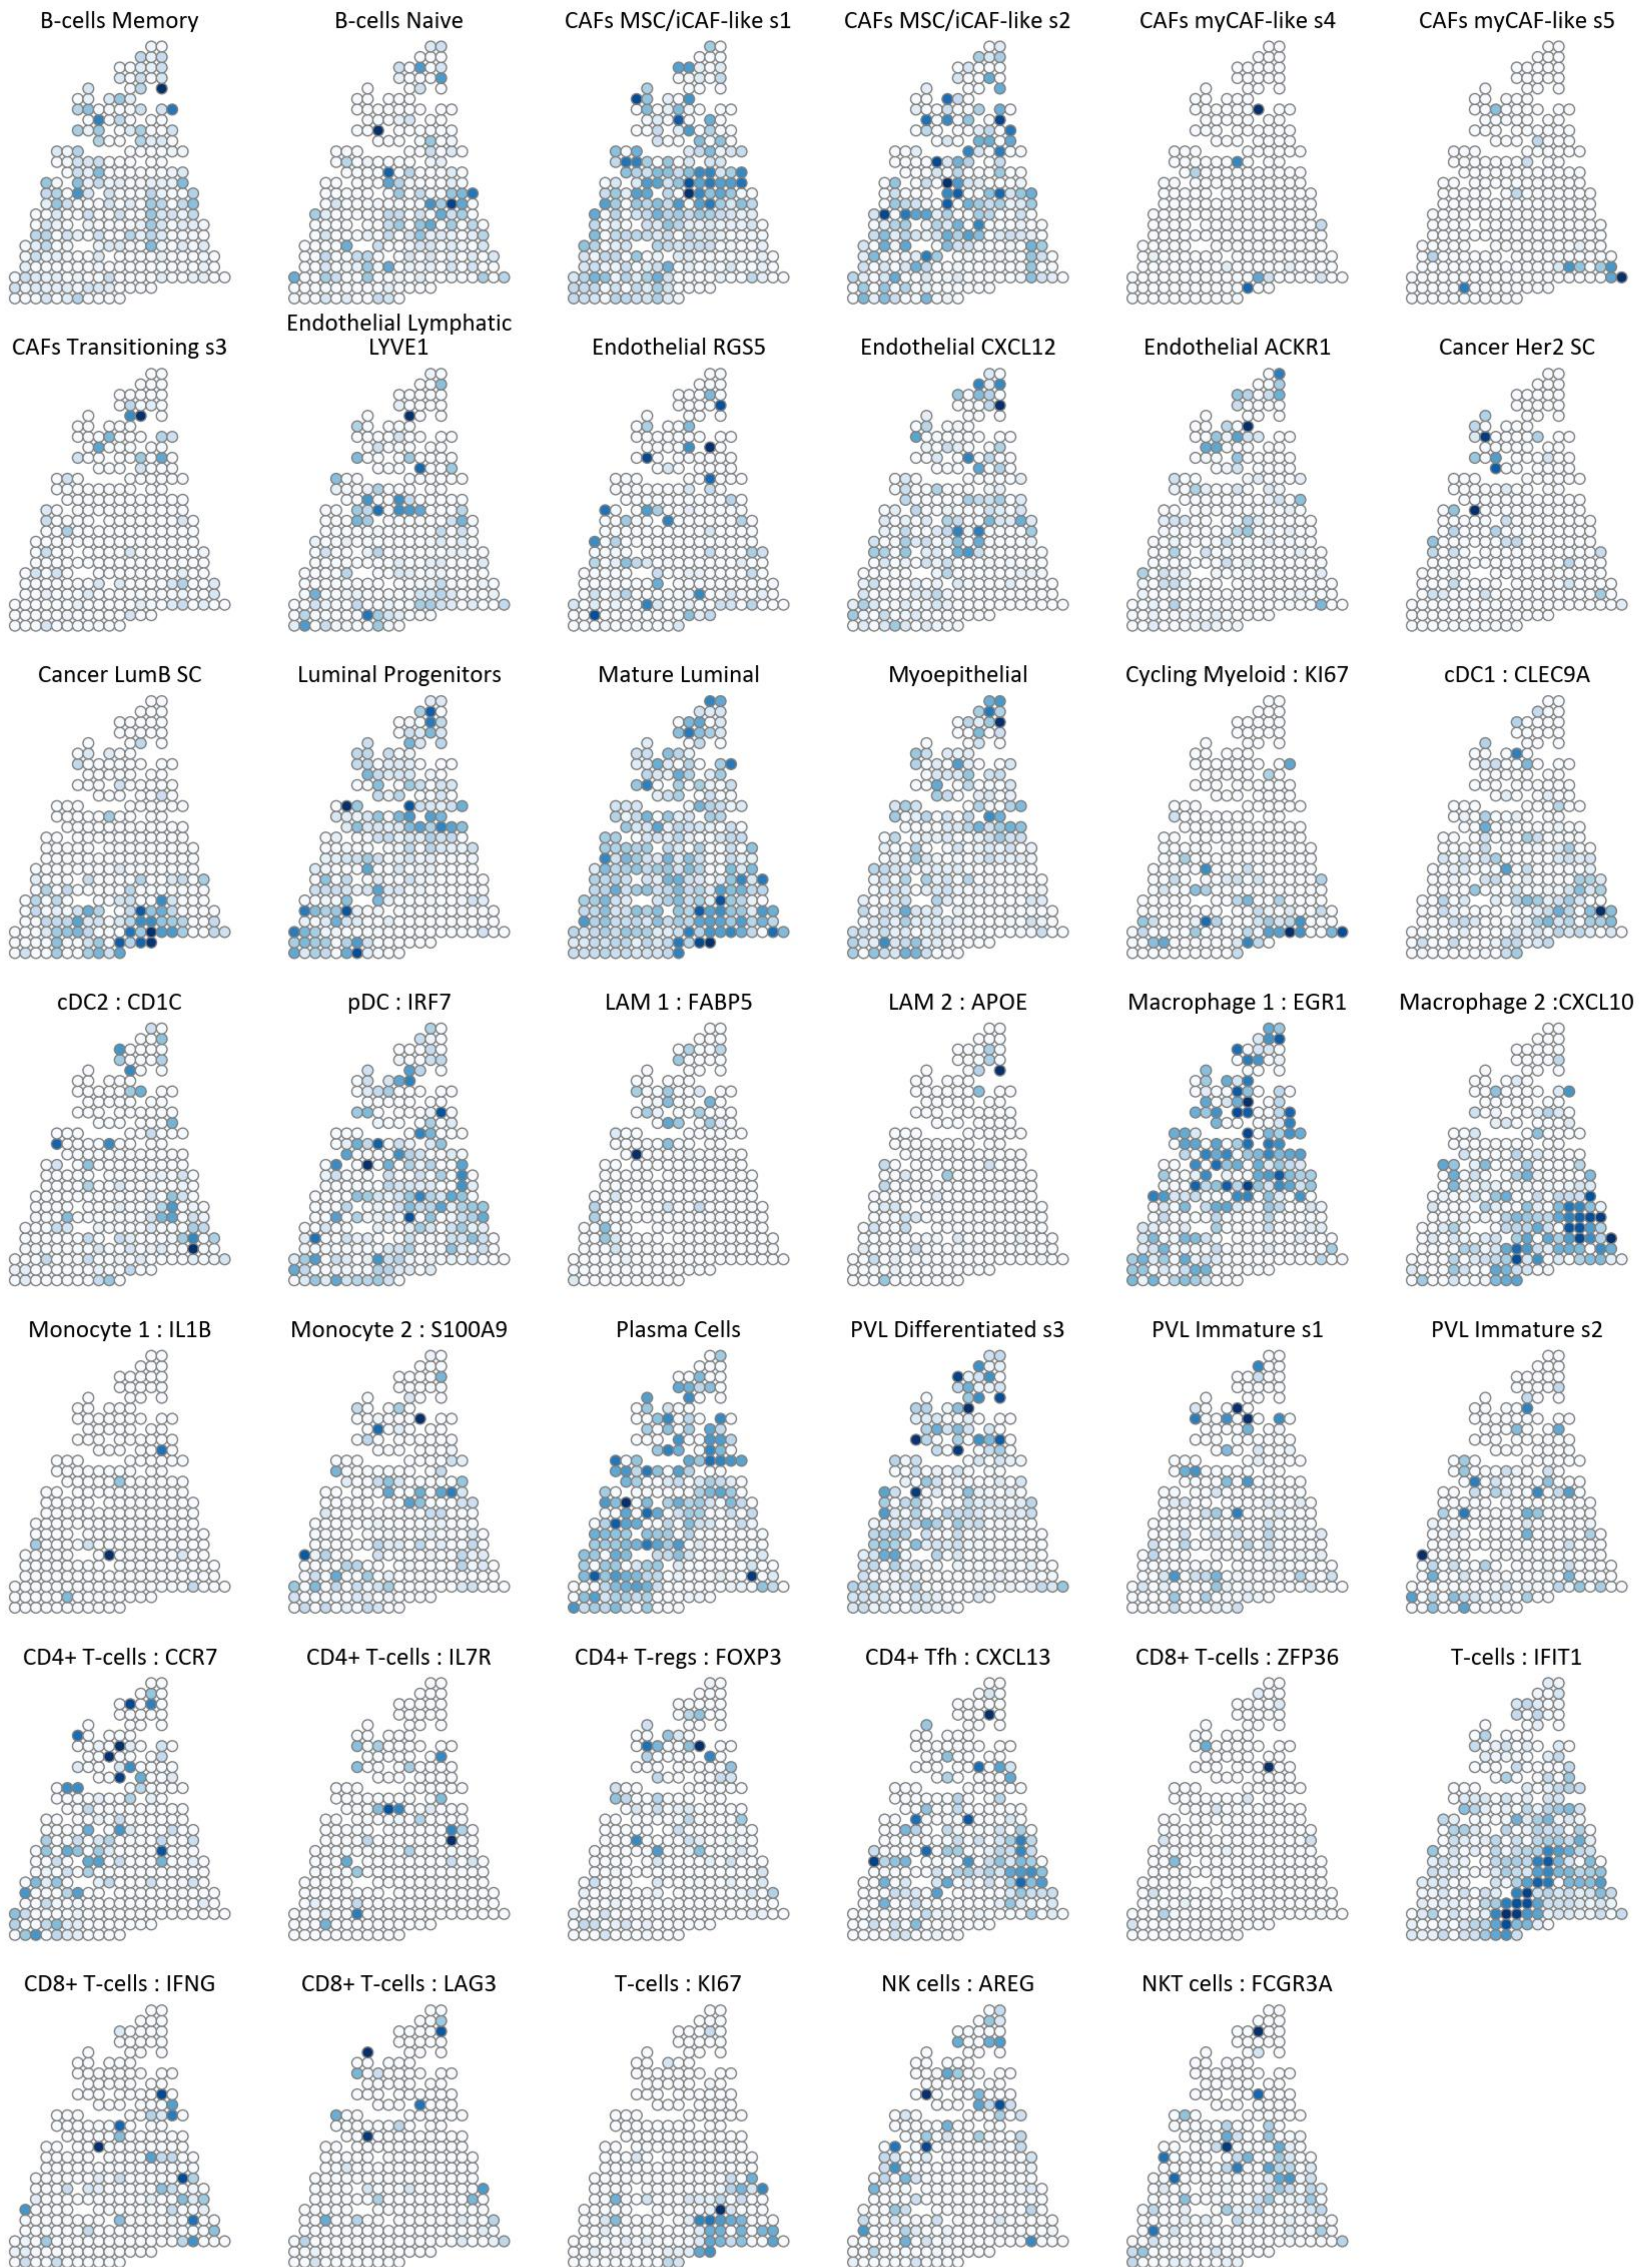

# subset\_C3

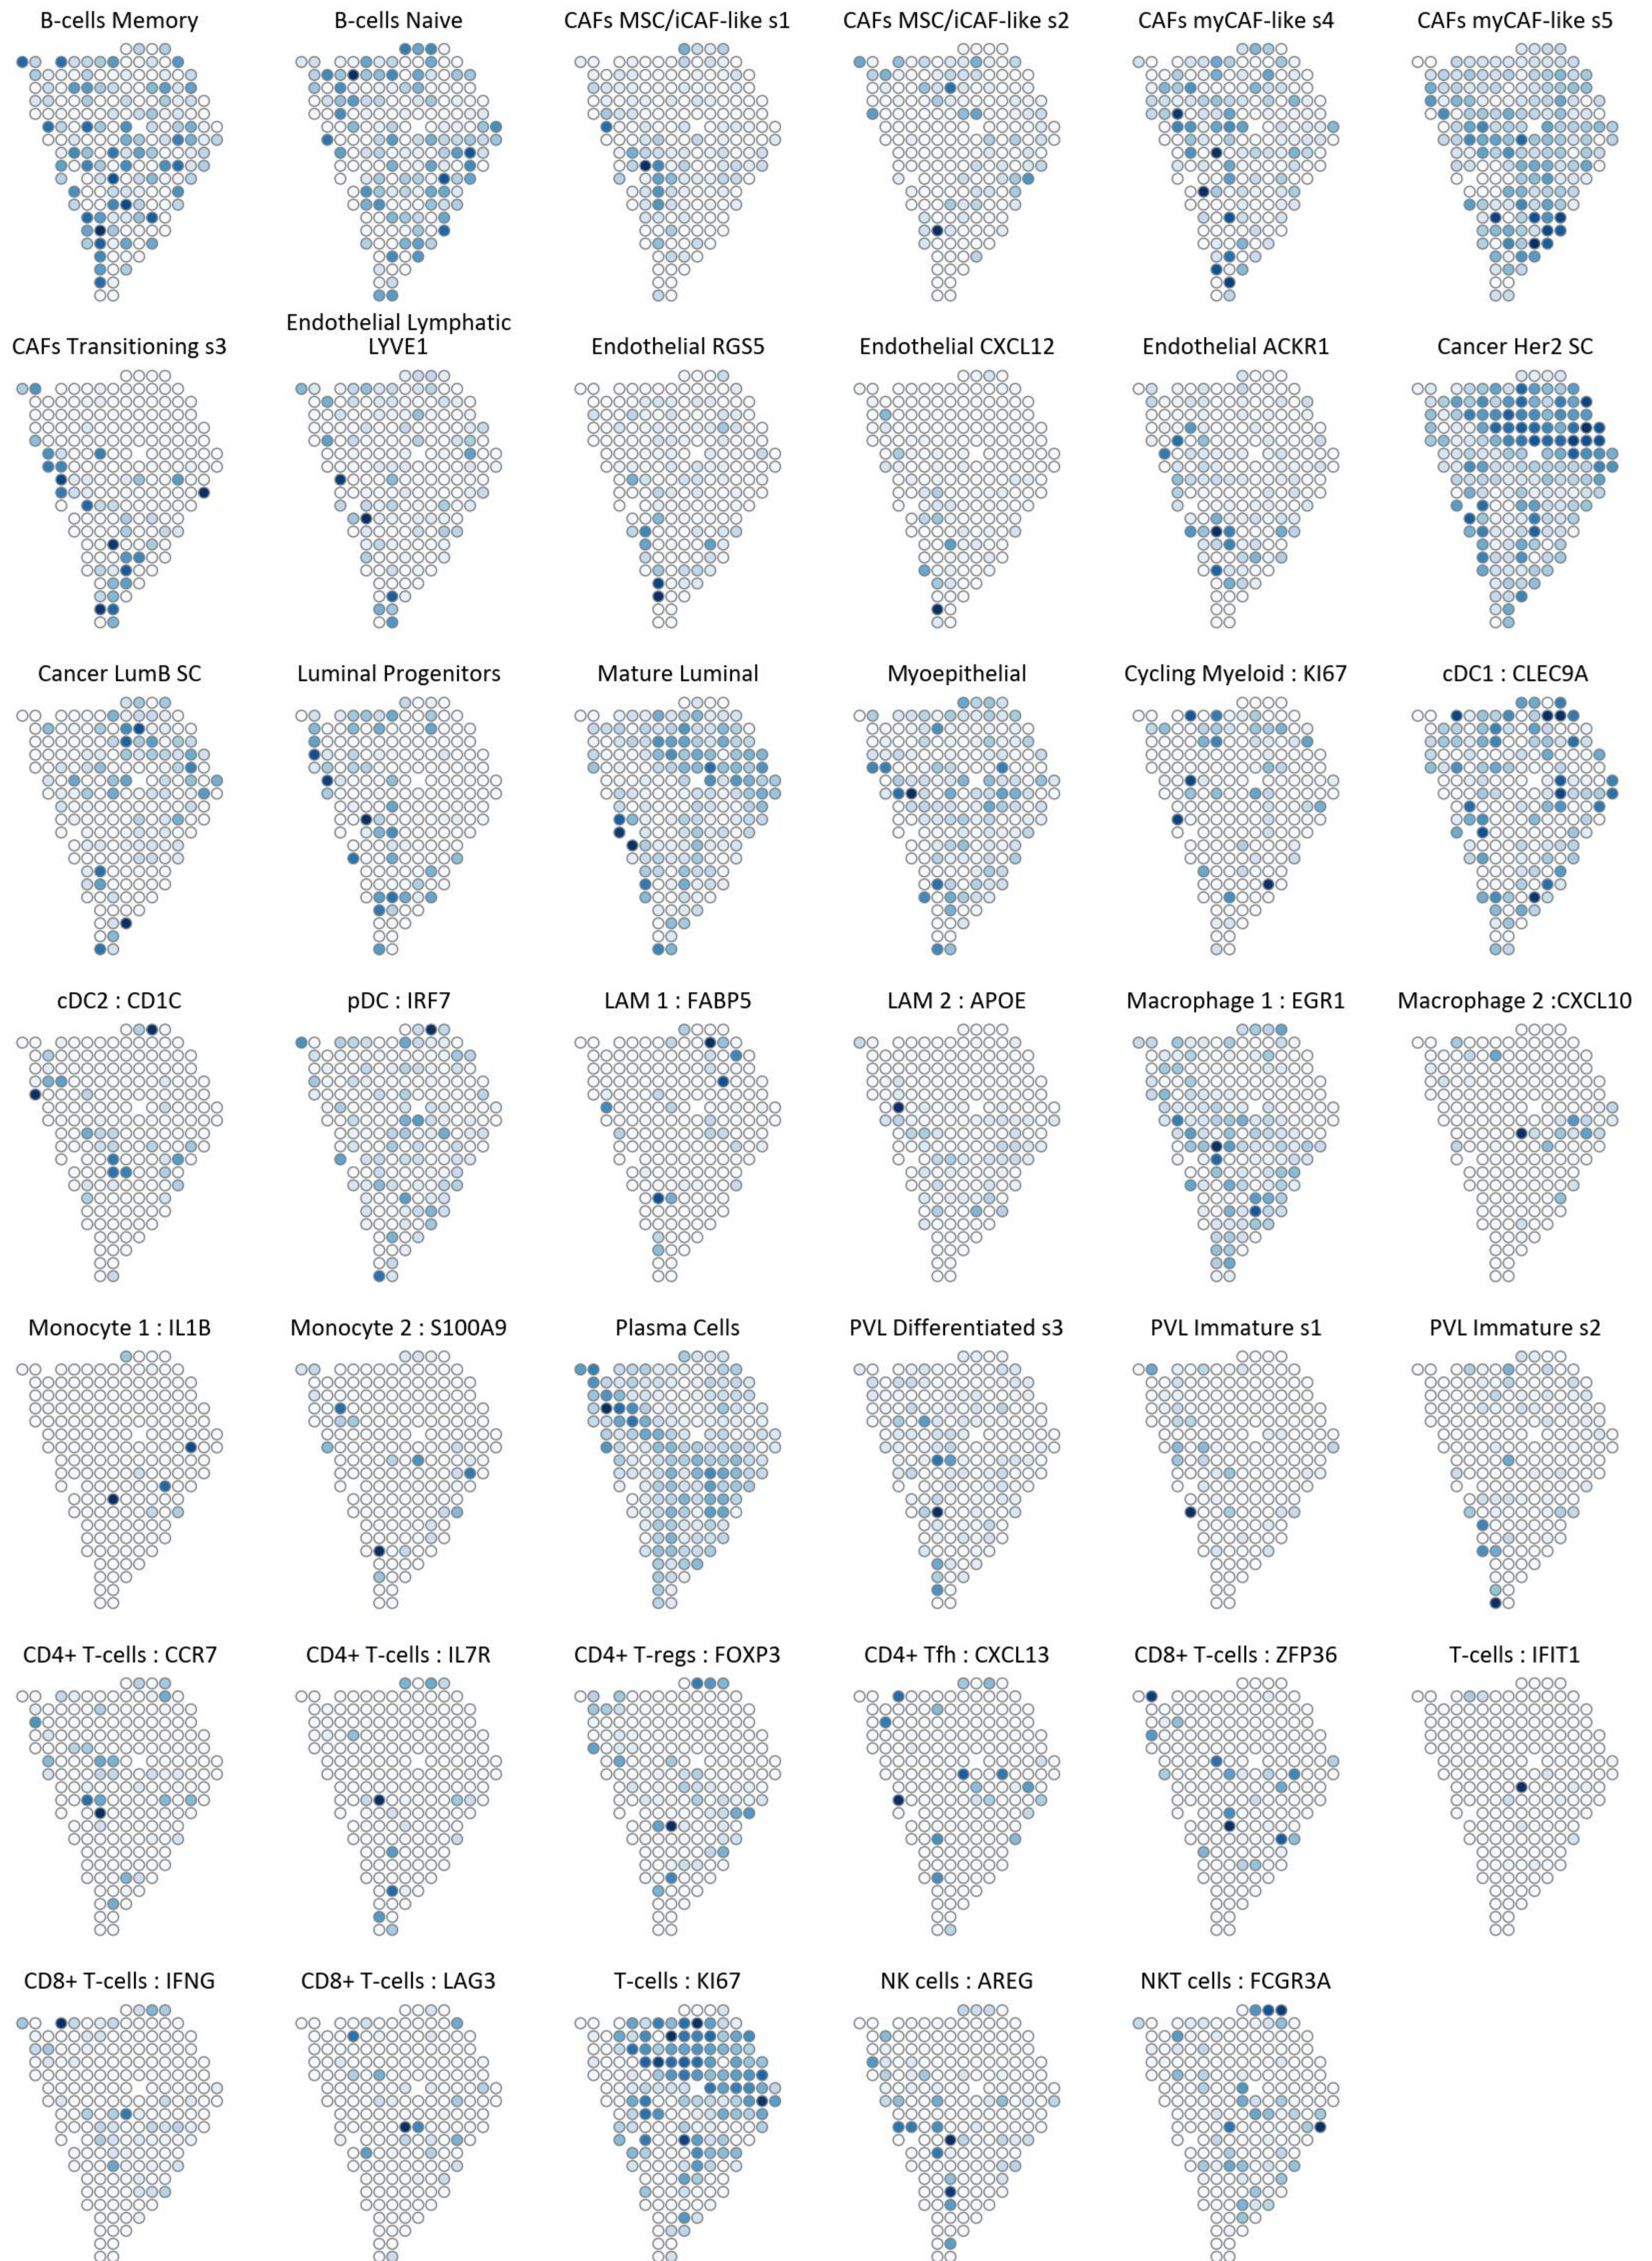

Supplement: 41467_2021_26271_MOESM10_ESM.pdf [file 41467_2021_26271_MOESM10_ESM.pdf]
