# Supplementary material for: Spatial deconvolution of HER2-positive breast cancer delineates tumor-associated cell type interactions
Source: PubMed Central journal article supplement (PMC8516894; doi:10.1038/s41467-021-26271-2), 2021-10-14

# pathologist\_subset\_H1-enrichment

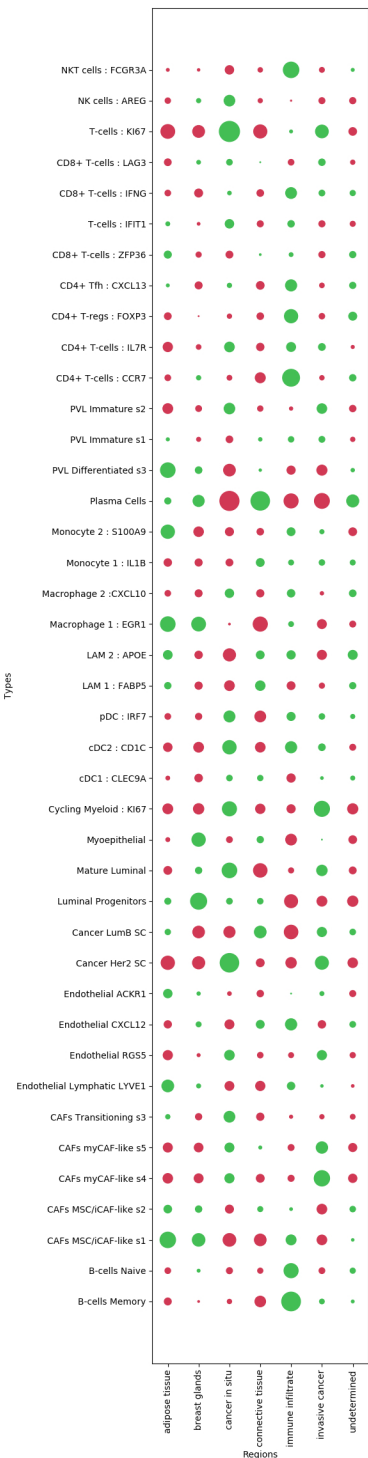

# pathologist\_subset\_B1-enrichment

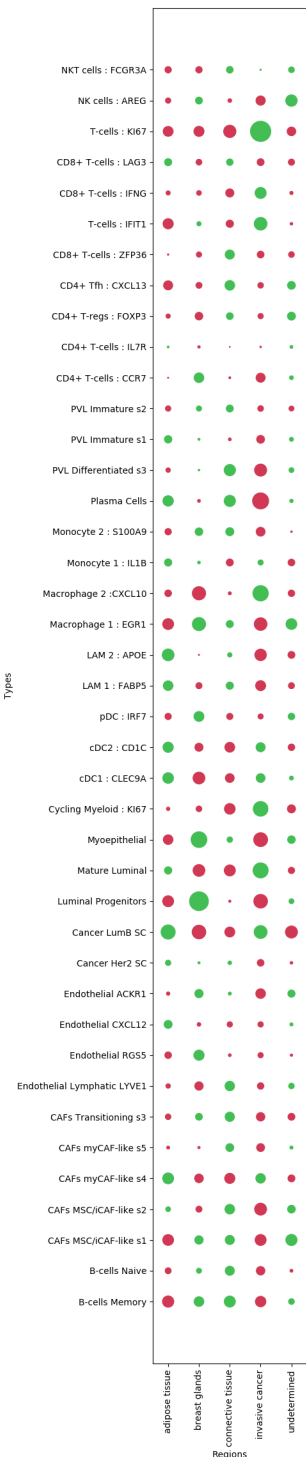

# pathologist\_subset\_F1-enrichment

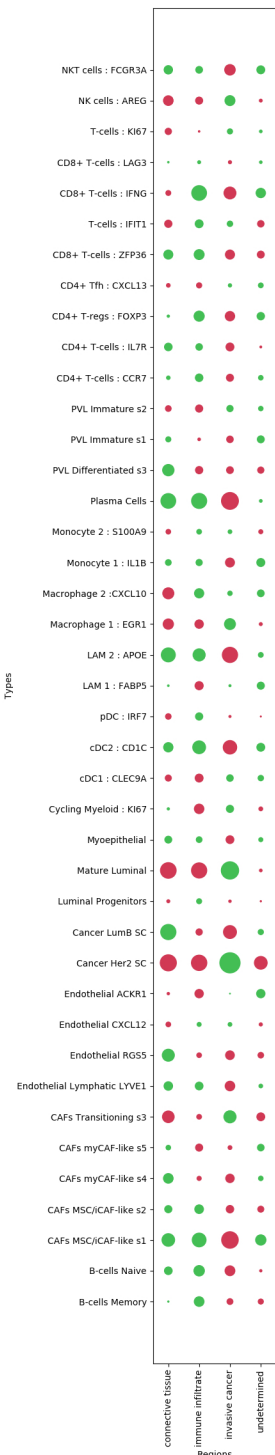

# pathologist\_subset\_C1-enrichment

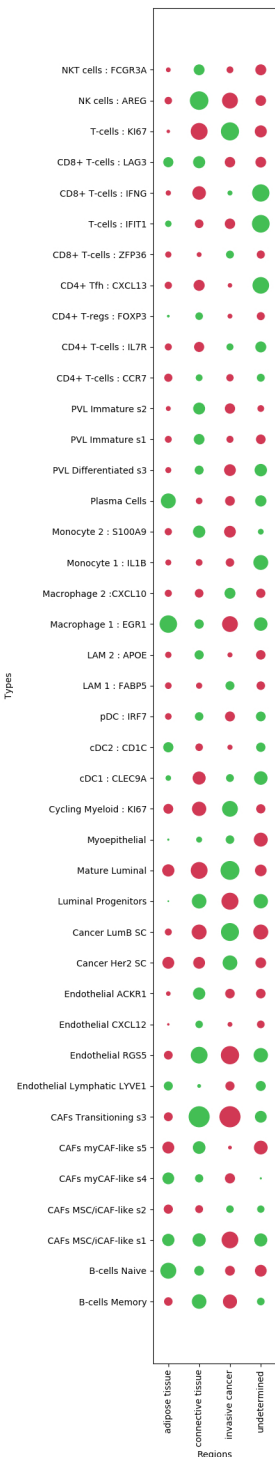

# pathologist\_subset\_G2-enrichment

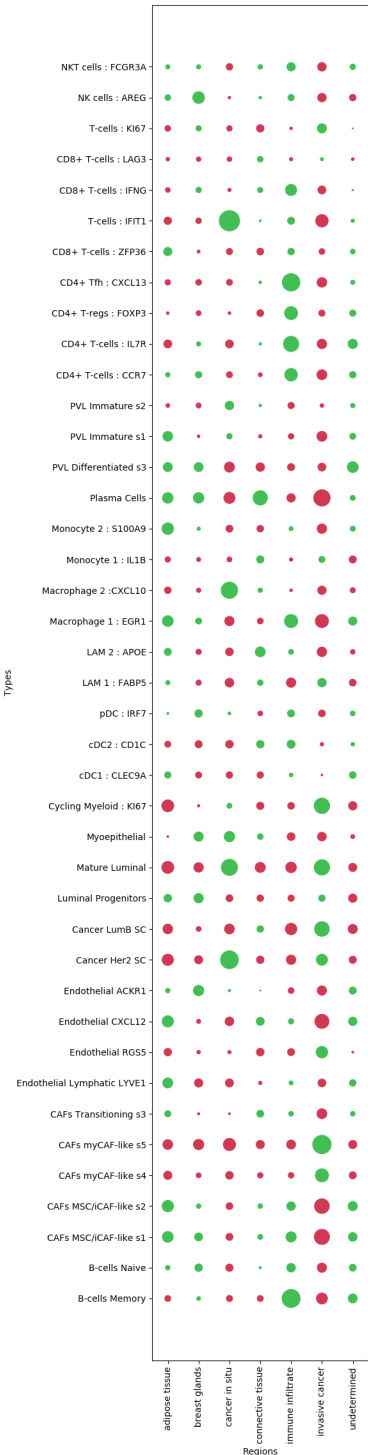

# pathologist\_subset\_D1-enrichment

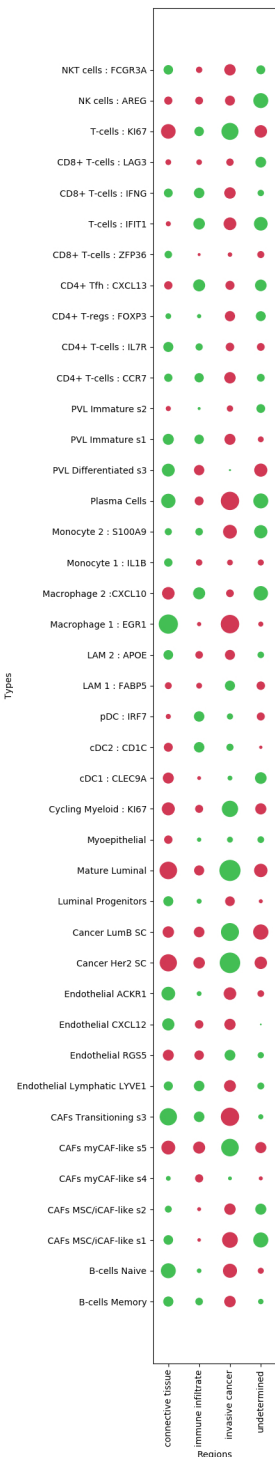

# pathologist\_subset\_A1-enrichment

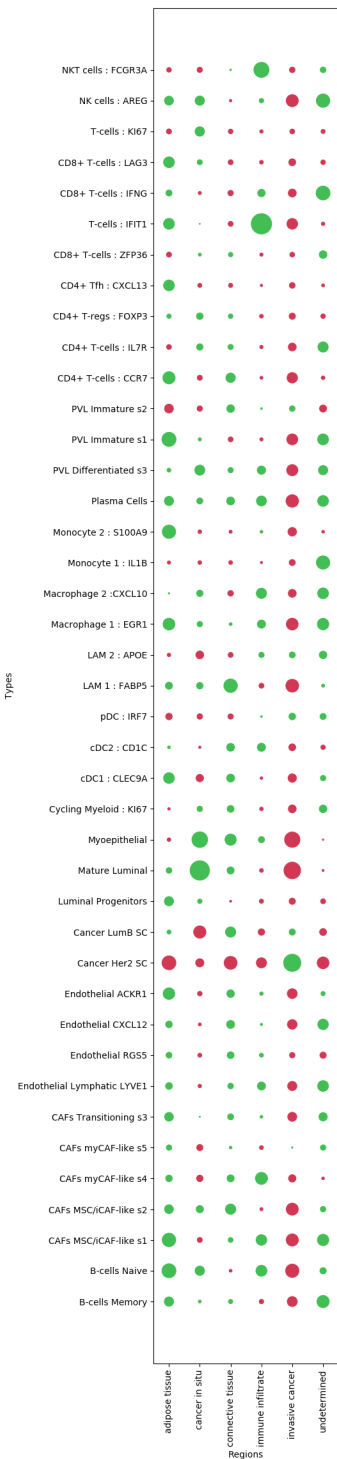

# pathologist\_subset\_E1-enrichment

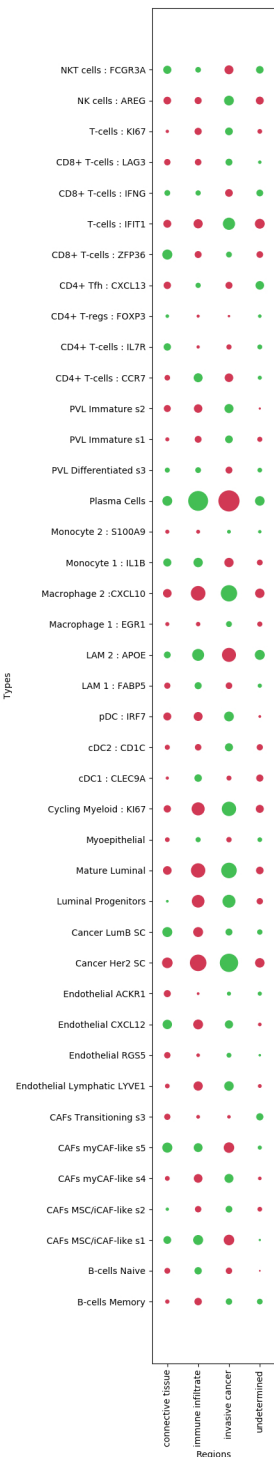



# pathologist\_major\_H1-enrichment

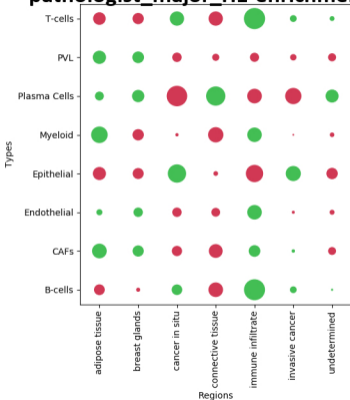

# pathologist\_major\_B1-enrichment

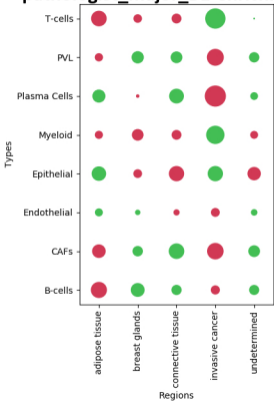

# pathologist\_major\_F1-enrichment

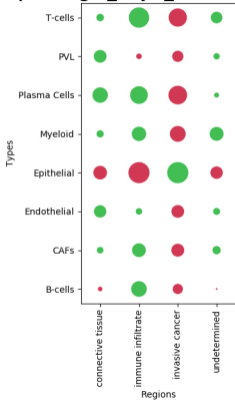

# pathologist\_major\_C1-enrichment

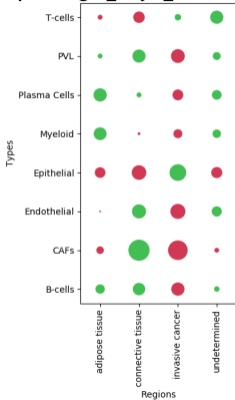

# pathologist\_major\_G2-enrichment

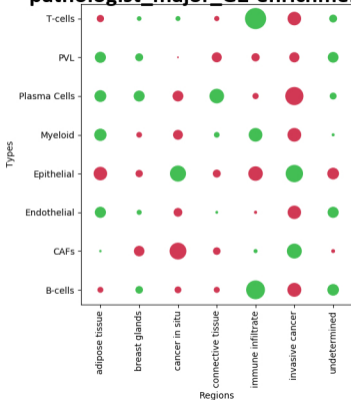

# pathologist\_major\_D1-enrichment

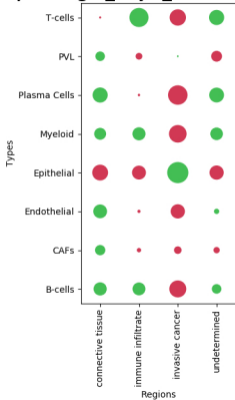

# pathologist\_major\_A1-enrichment

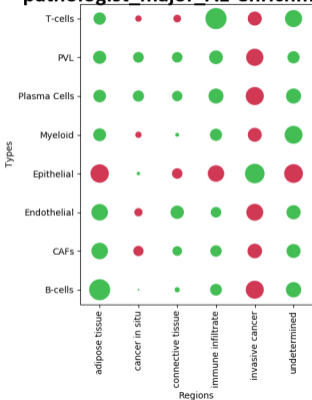

# pathologist\_major\_E1-enrichment

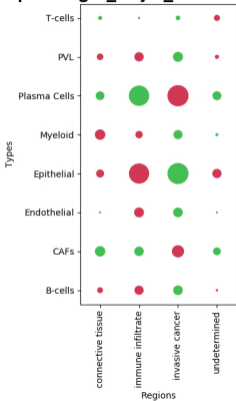



# pathologist\_minor\_H1-enrichment

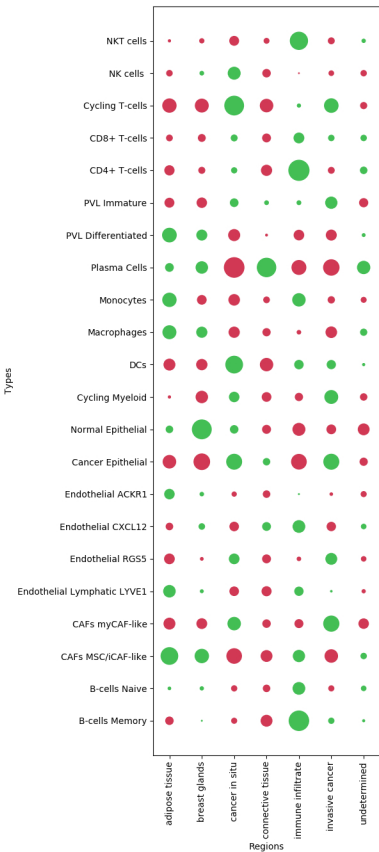

# pathologist\_minor\_B1-enrichment

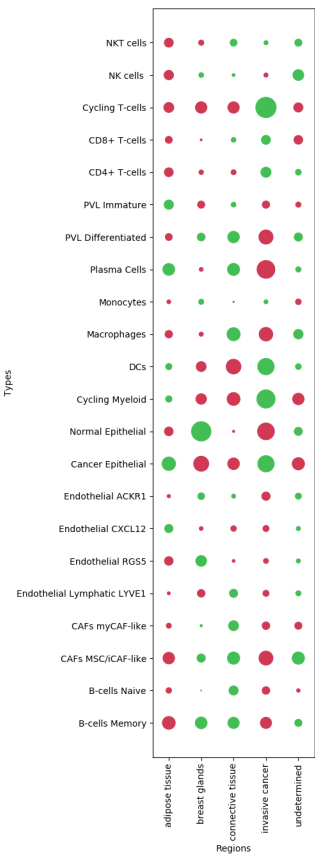

# pathologist\_minor\_F1-enrichment

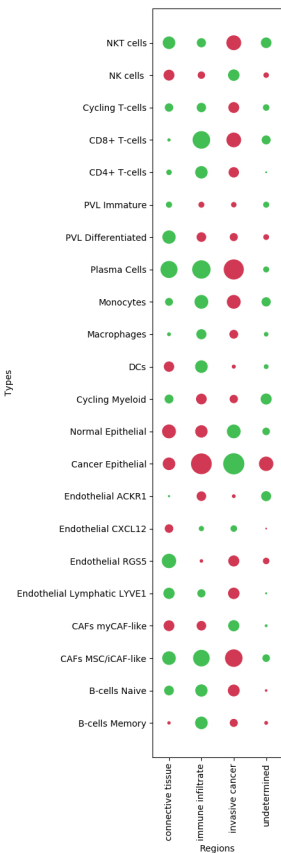

# pathologist\_minor\_C1-enrichment

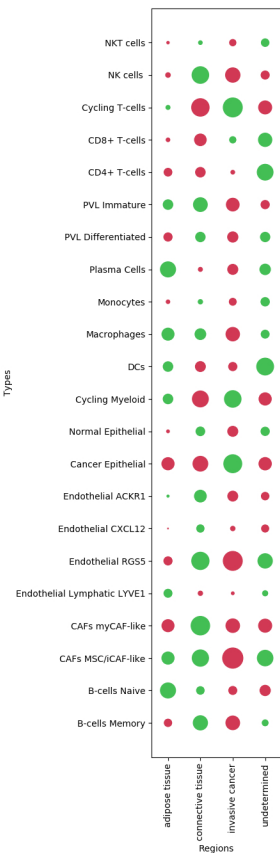

# pathologist\_minor\_G2-enrichment

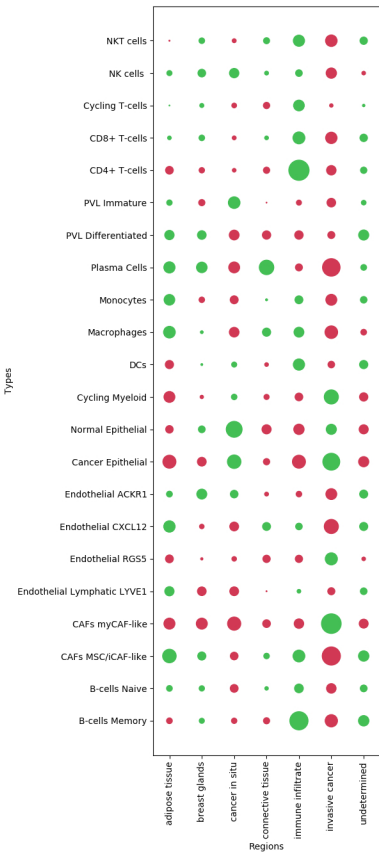

# pathologist\_minor\_D1-enrichment

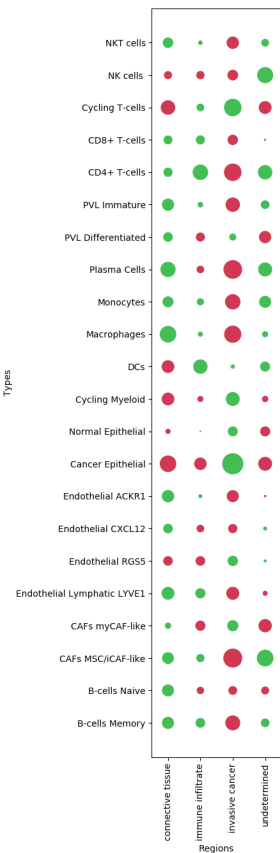

# pathologist\_minor\_A1-enrichment

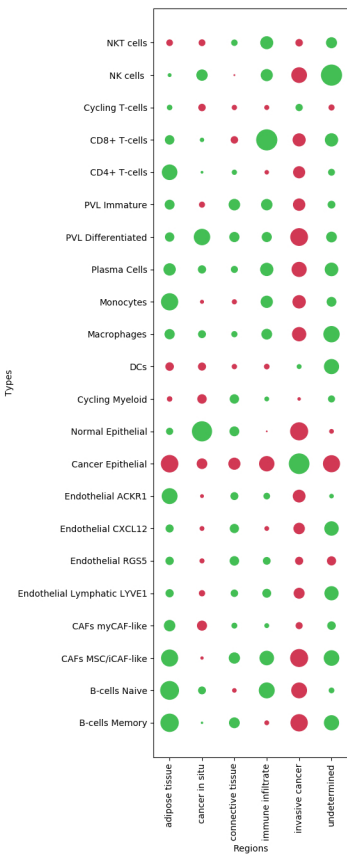

# pathologist\_minor\_E1-enrichment

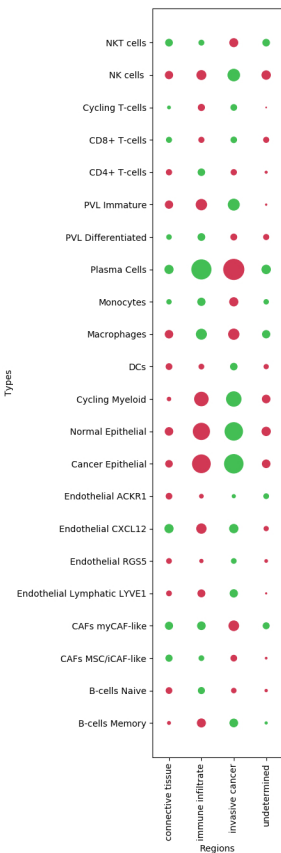



# cluster\_subset\_C6-enrichment

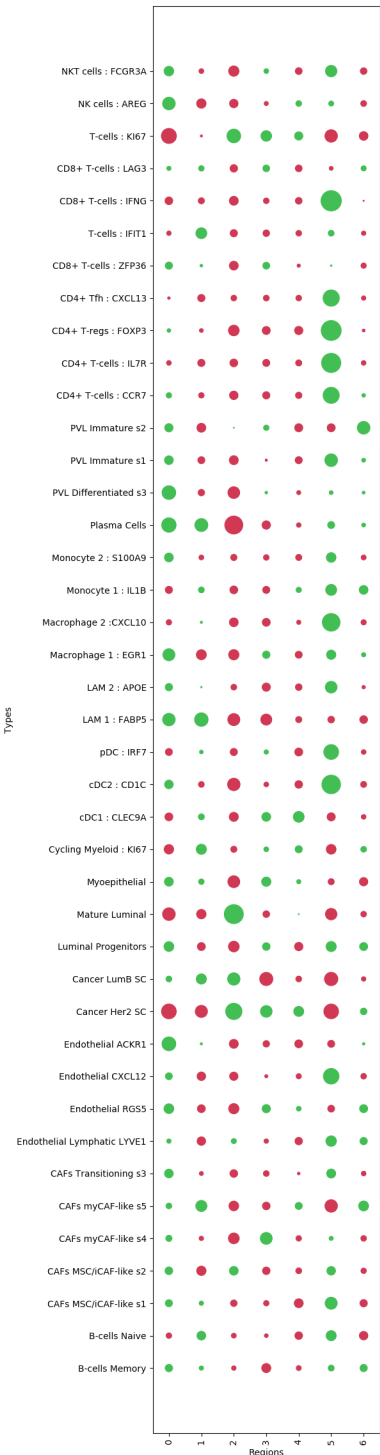

# cluster\_subset\_C4-enrichment

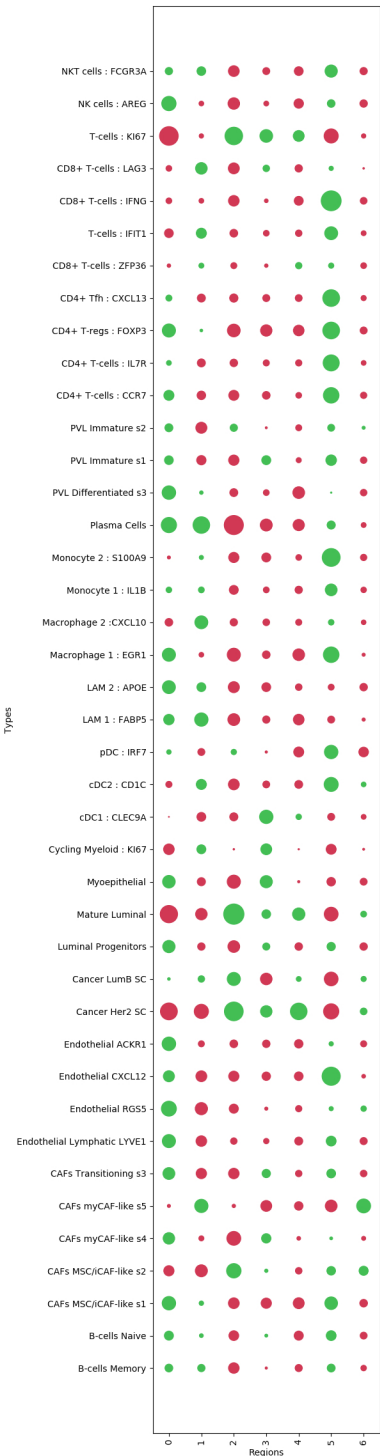

# cluster\_subset\_C3-enrichment

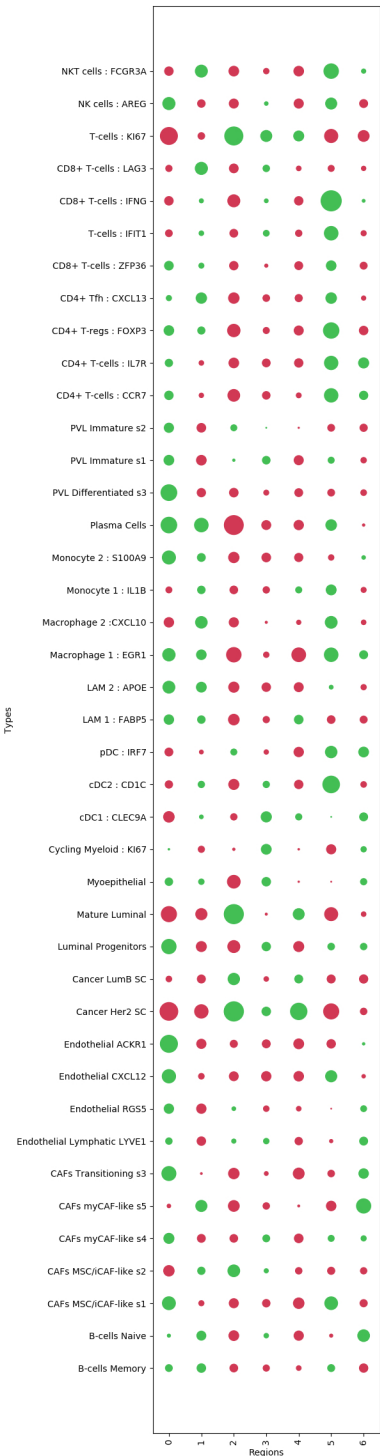

# cluster\_subset\_A3-enrichment

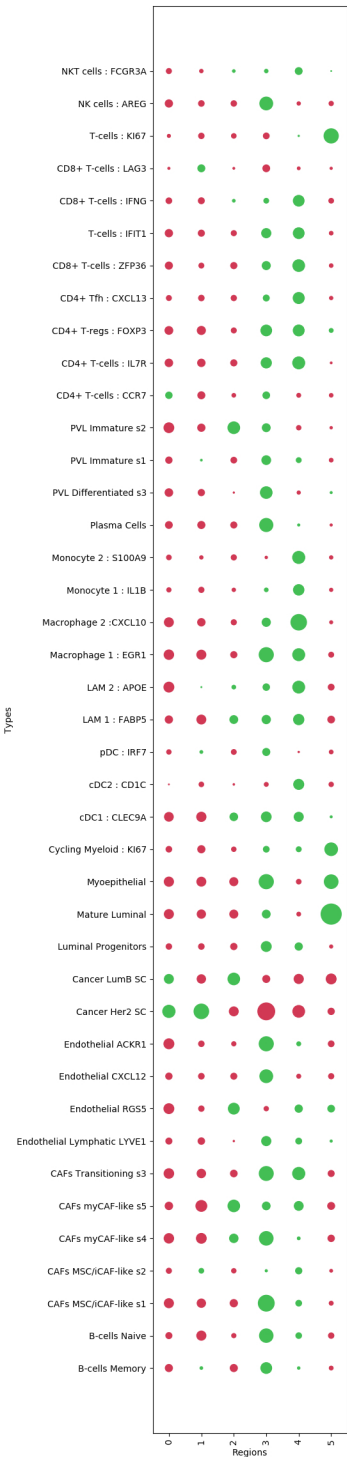

# cluster\_subset\_H1-enrichment

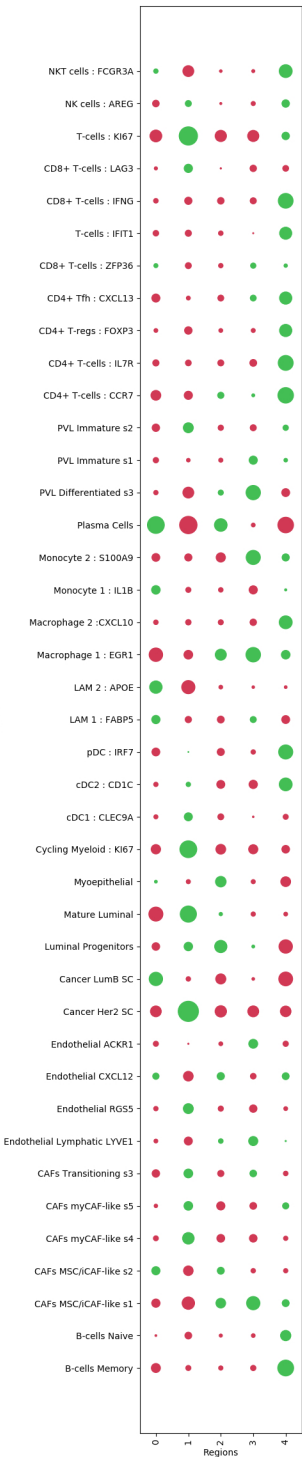

# cluster\_subset\_B4-enrichment

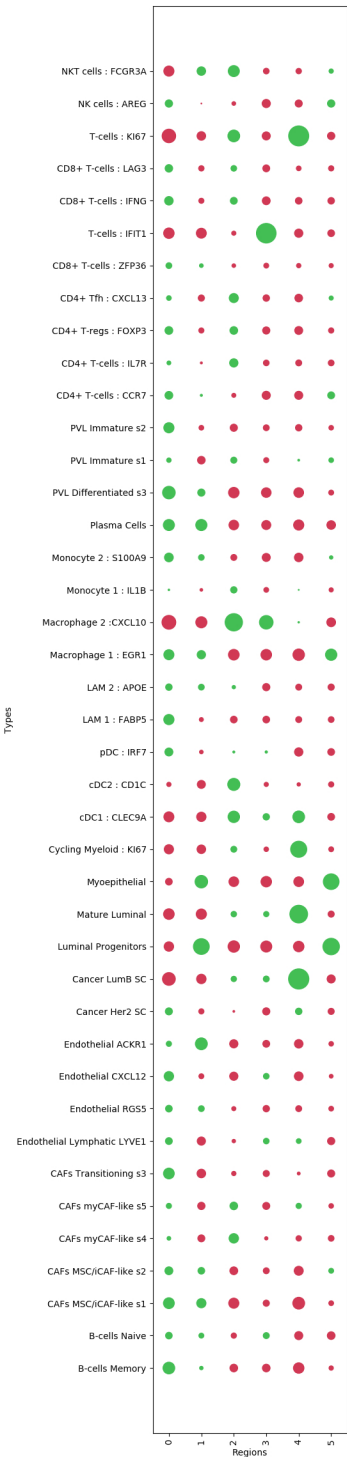

# cluster\_subset\_B1-enrichment

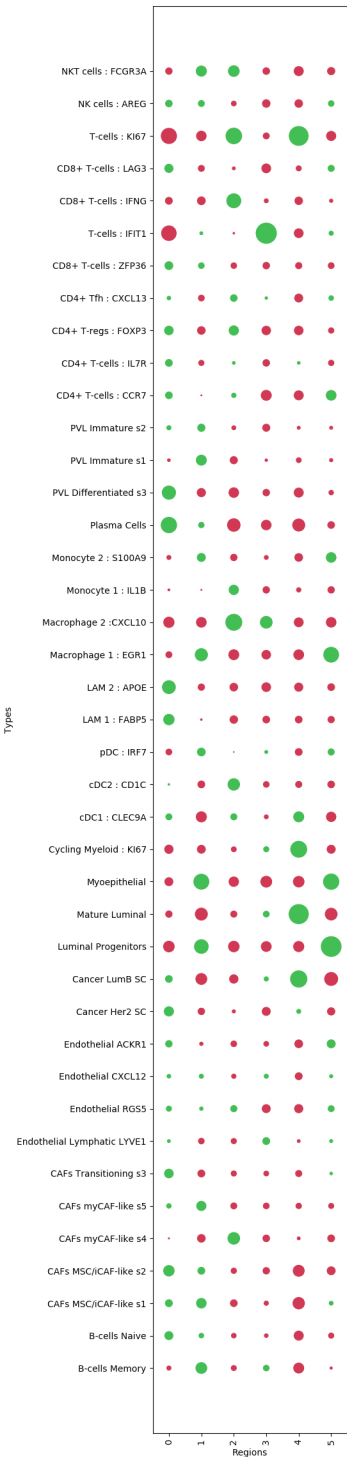

# cluster\_subset\_C2-enrichment

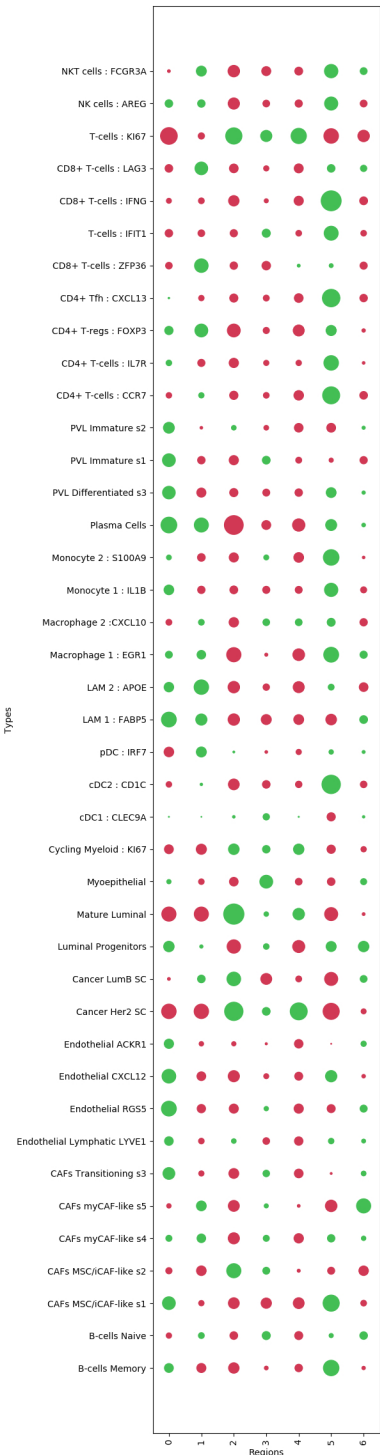



# cluster\_subset\_A4-enrichment

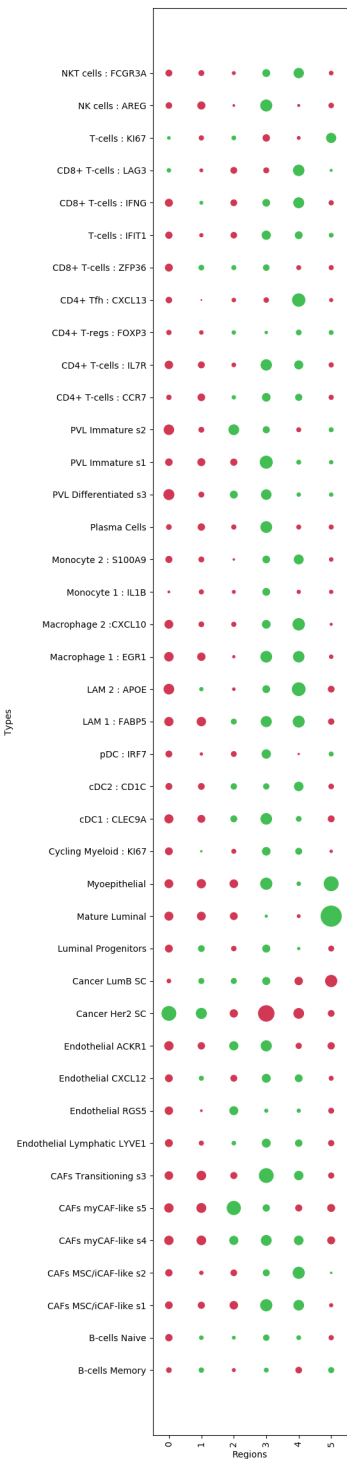

# cluster\_subset\_F1-enrichment

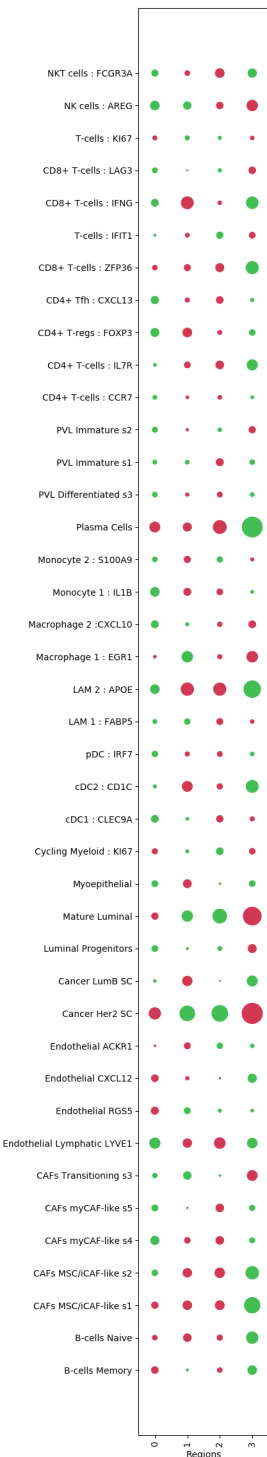

# cluster\_subset\_D6-enrichment

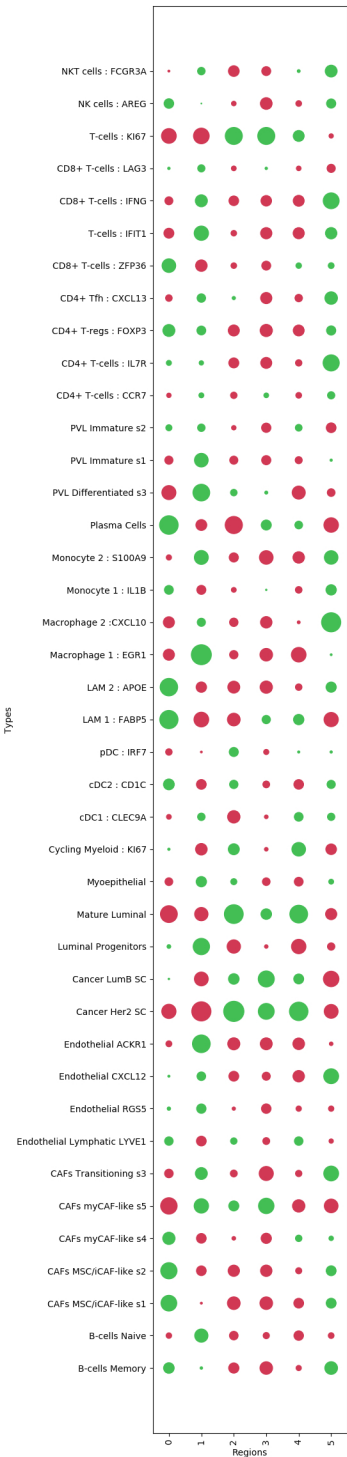

# cluster\_subset\_G1-enrichment

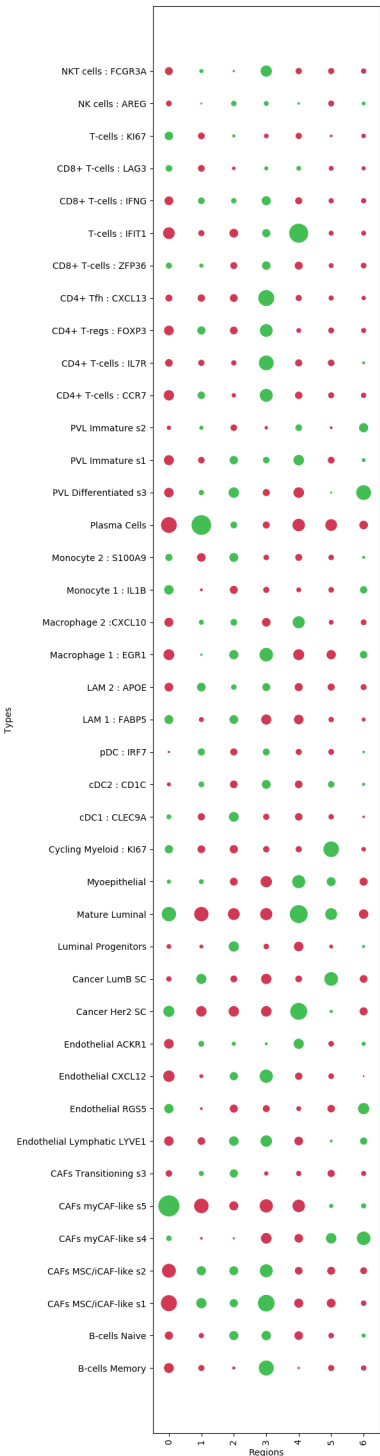

# cluster\_subset\_C5-enrichment

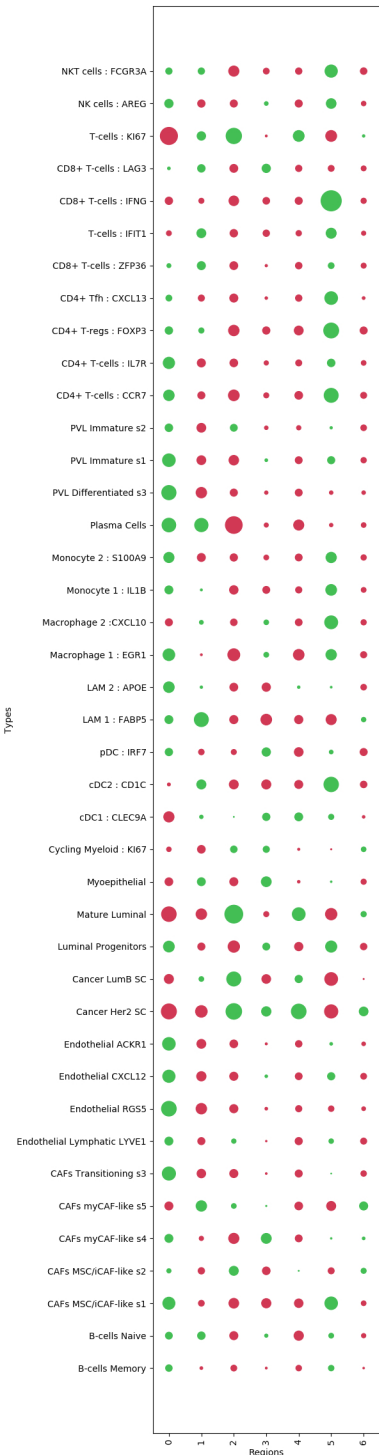

# cluster\_subset\_C1-enrichment

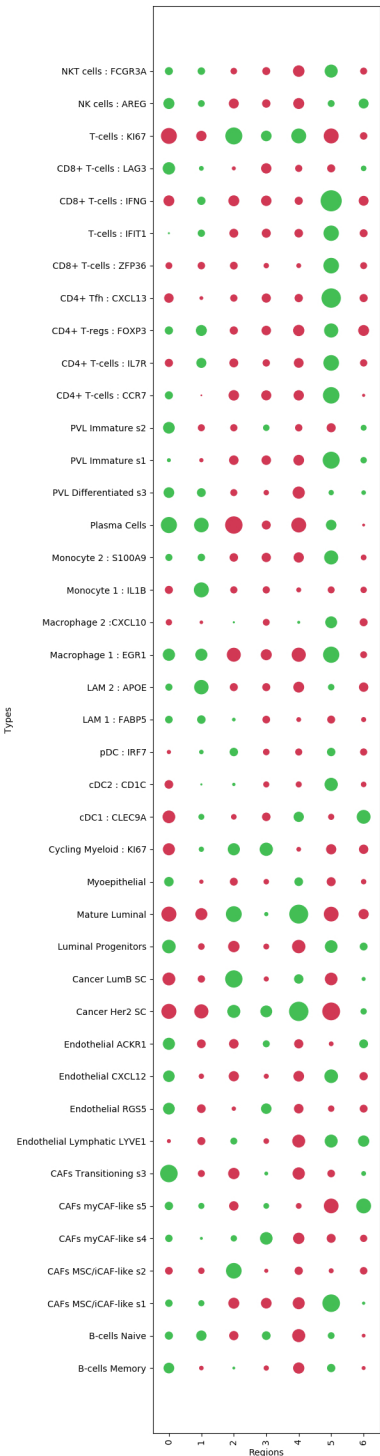

# cluster\_subset\_B6-enrichment

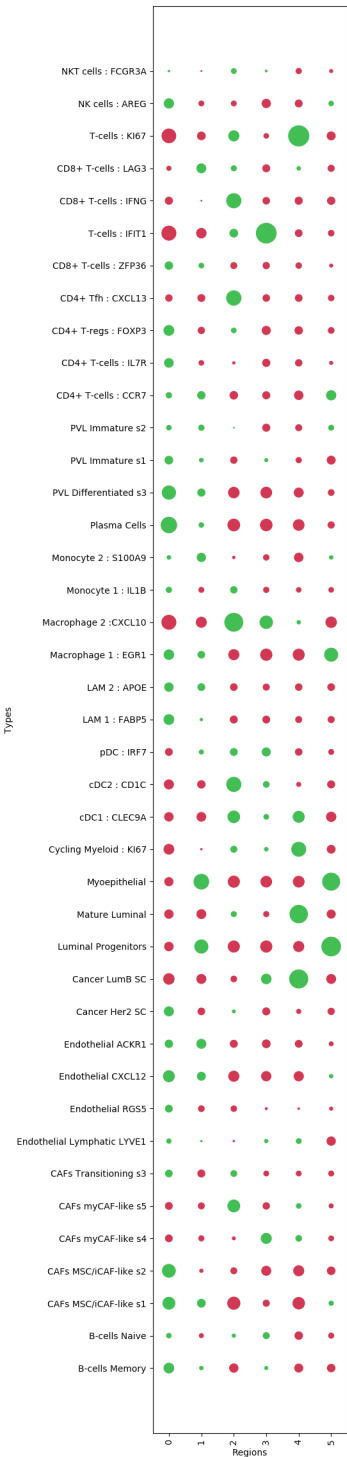

# cluster\_subset\_E3-enrichment

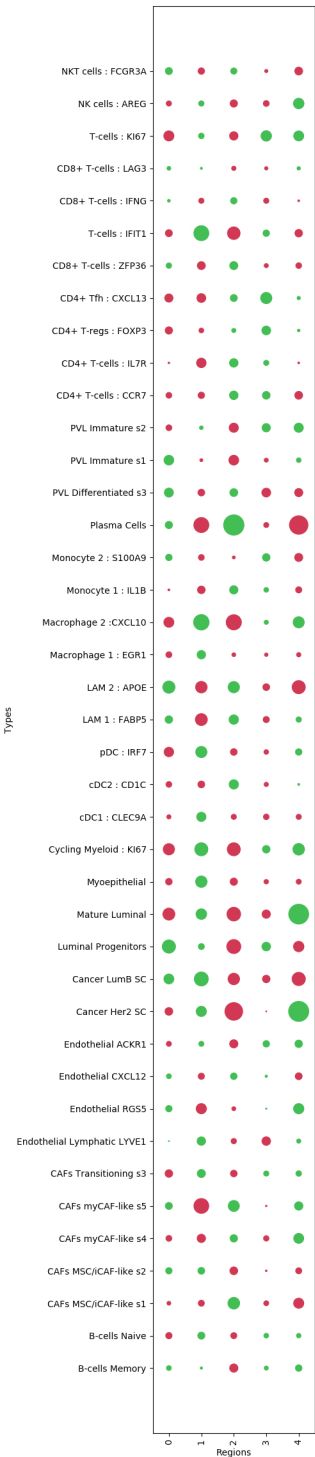



# cluster\_subset\_D2-enrichment

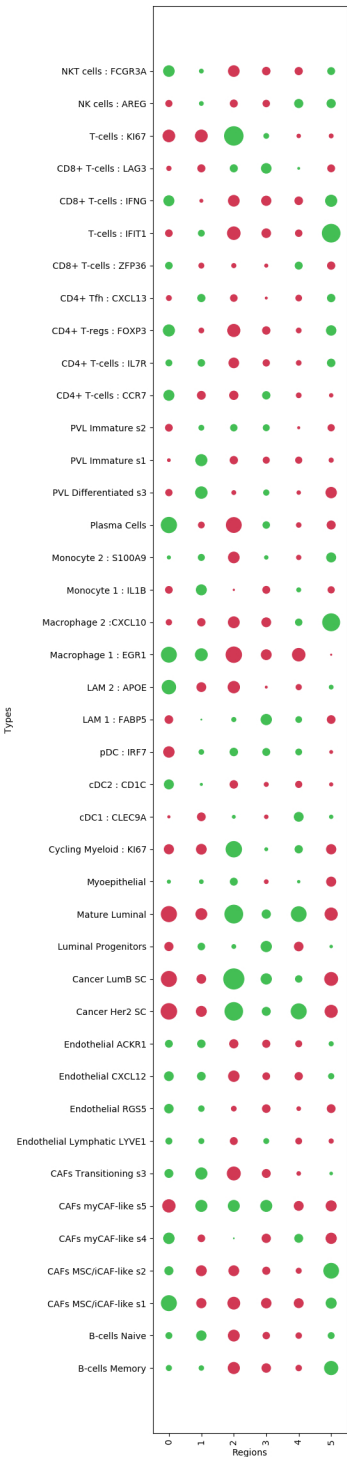

# cluster\_subset\_D3-enrichment

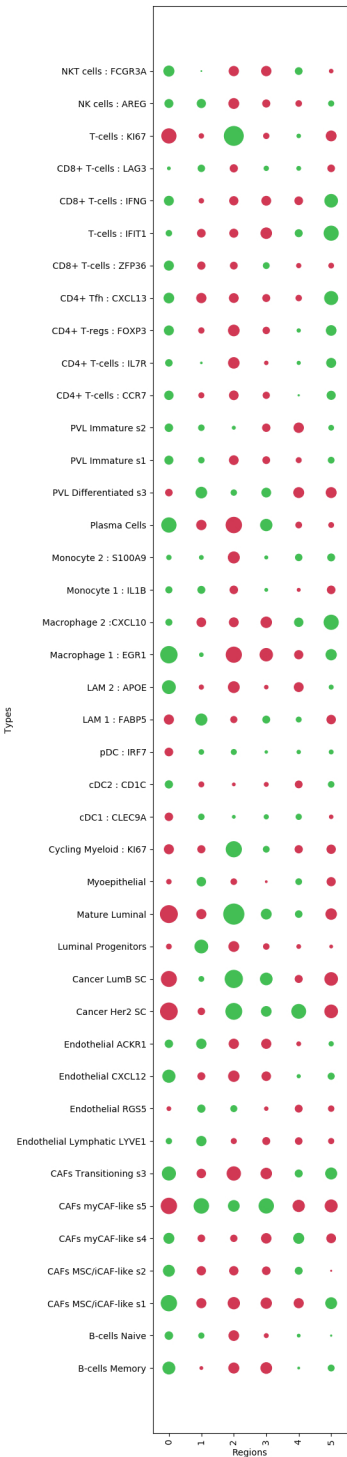

# cluster\_subset\_G2-enrichment

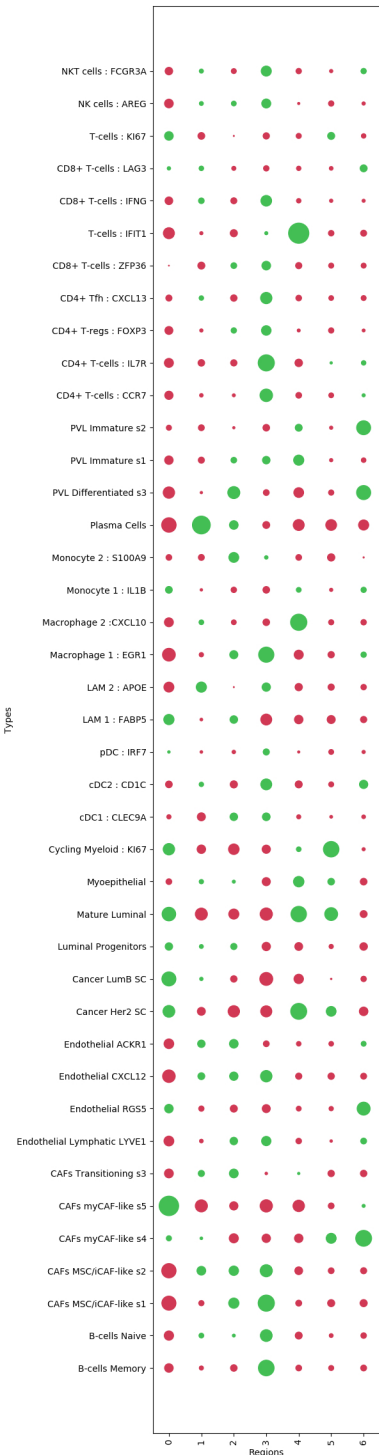

# cluster\_subset\_B3-enrichment

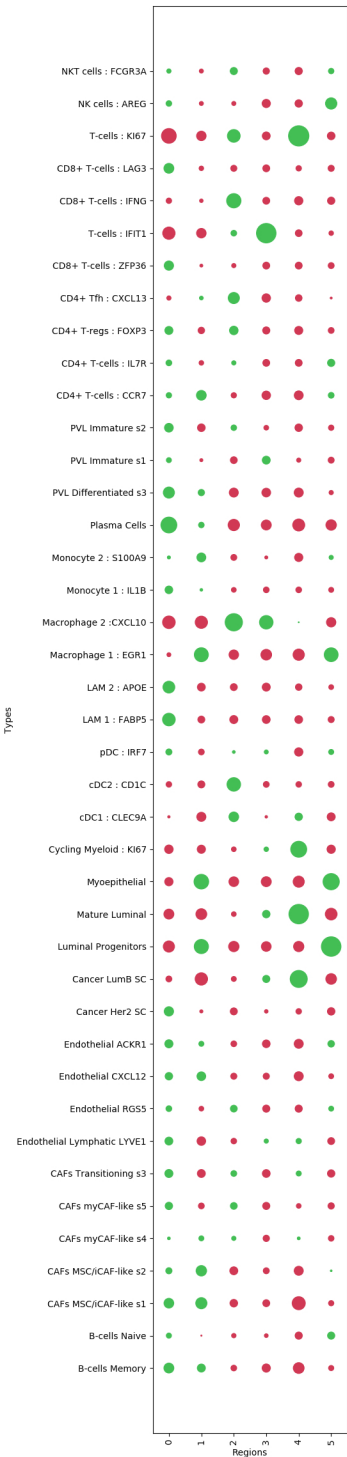

# cluster\_subset\_F2-enrichment

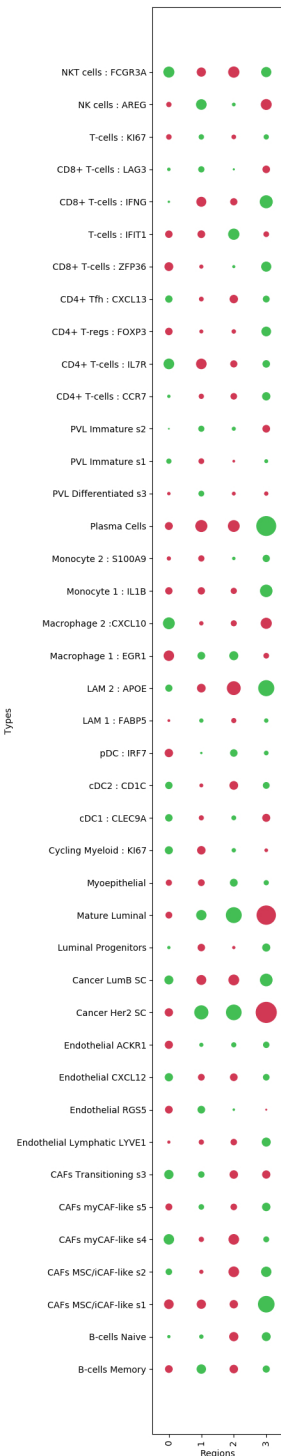

# cluster\_subset\_F3-enrichment

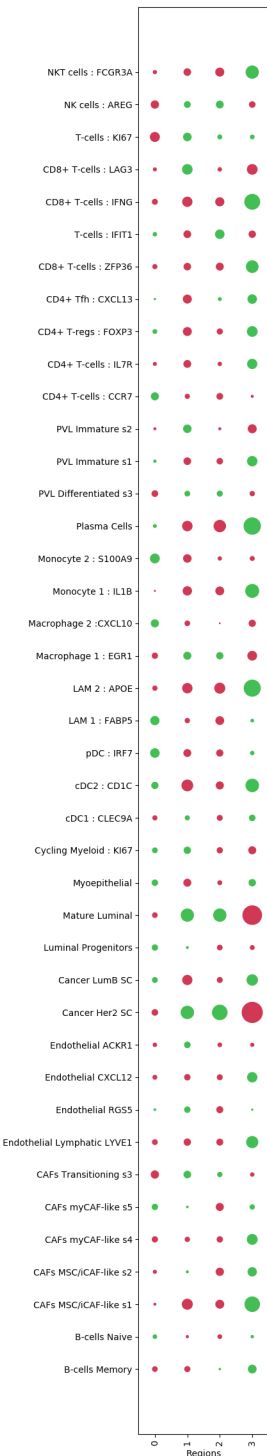

# cluster\_subset\_D1-enrichment

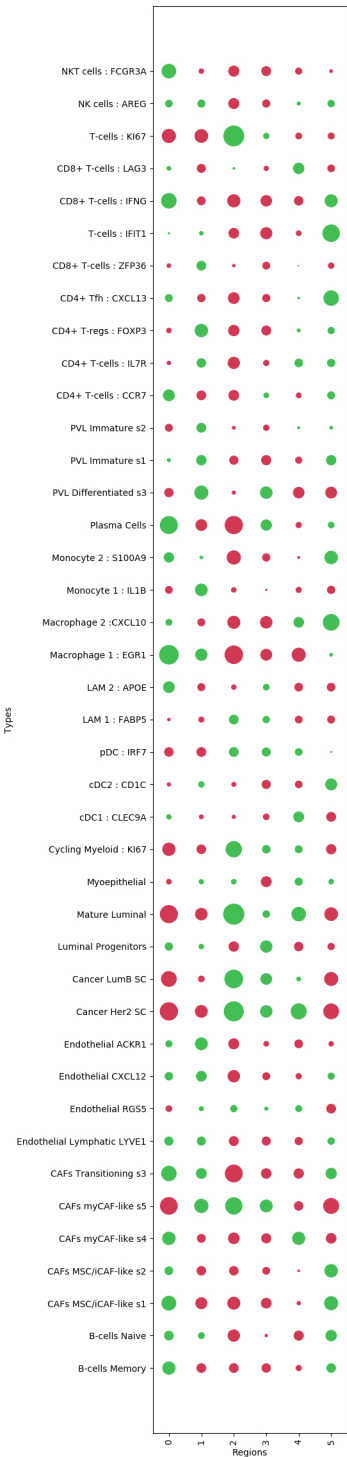

# cluster\_subset\_A1-enrichment

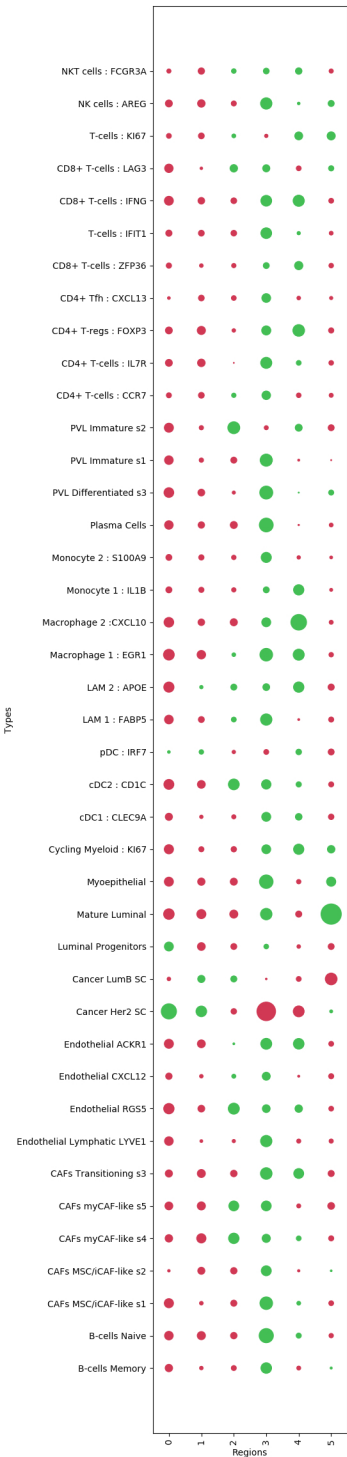



# cluster\_subset\_B5-enrichment

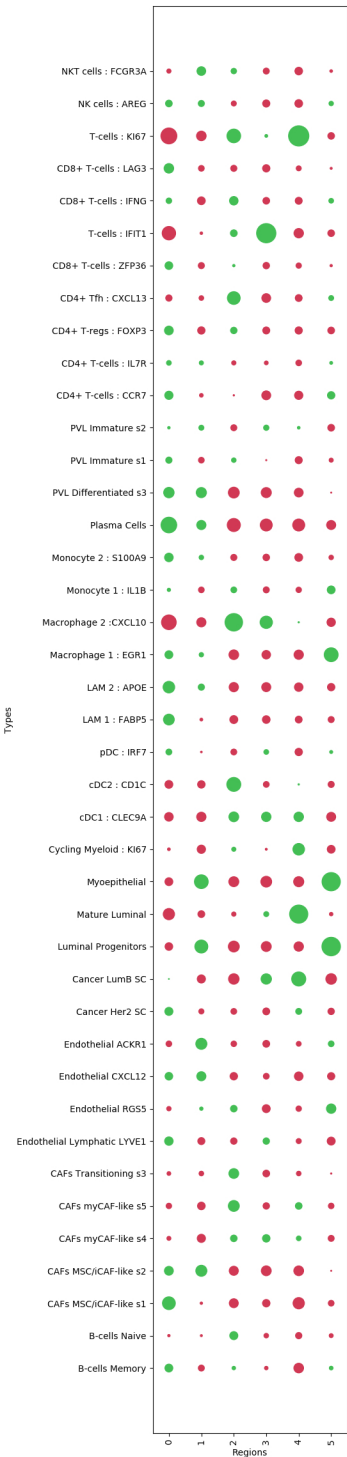

# cluster\_subset\_E2-enrichment

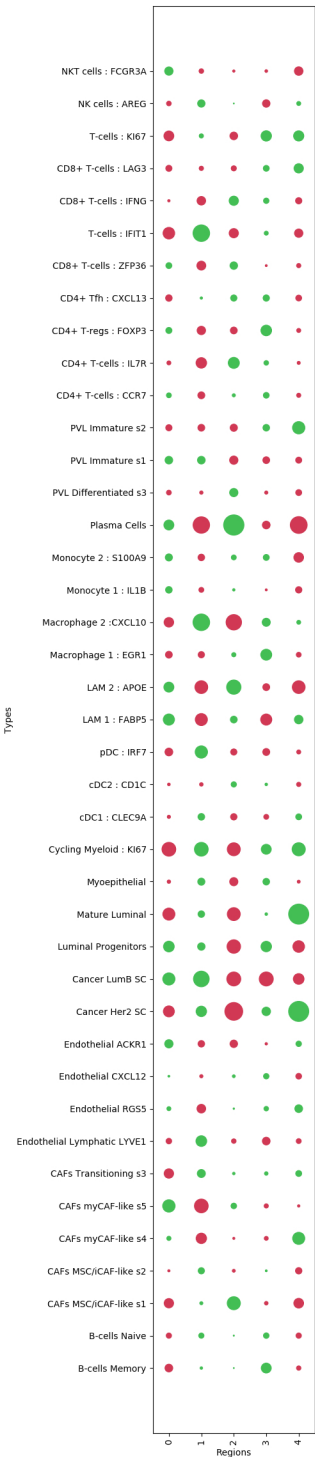

# cluster\_subset\_A5-enrichment

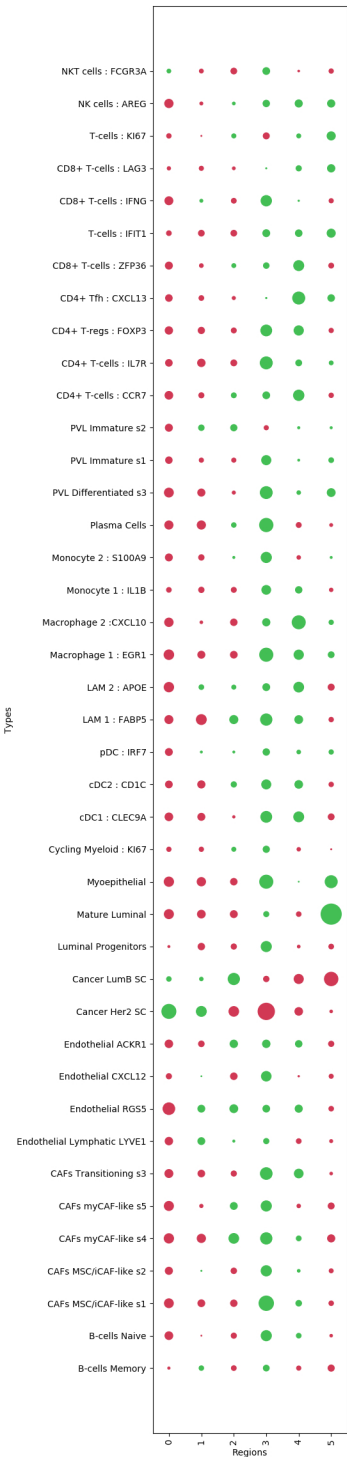

# cluster\_subset\_G3-enrichment

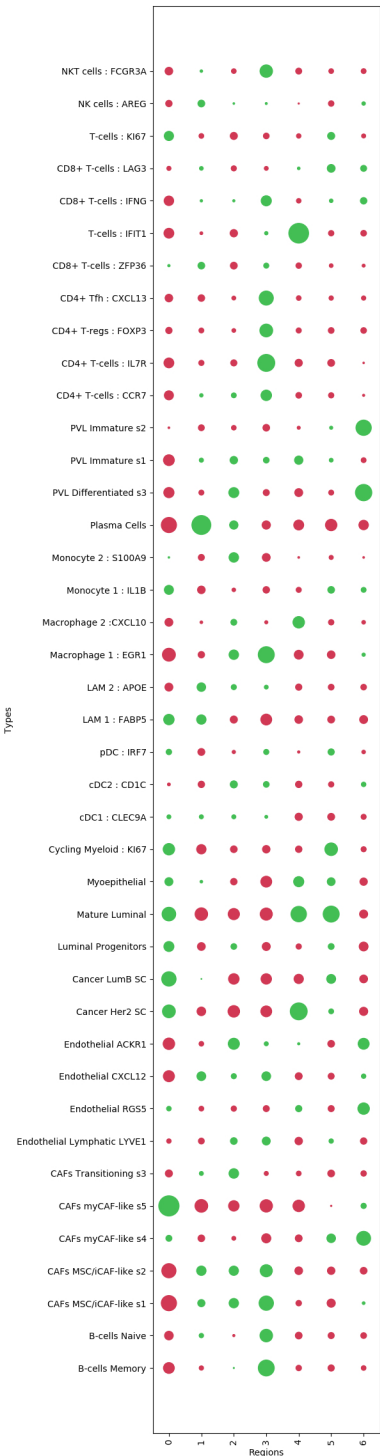

# cluster\_subset\_B2-enrichment

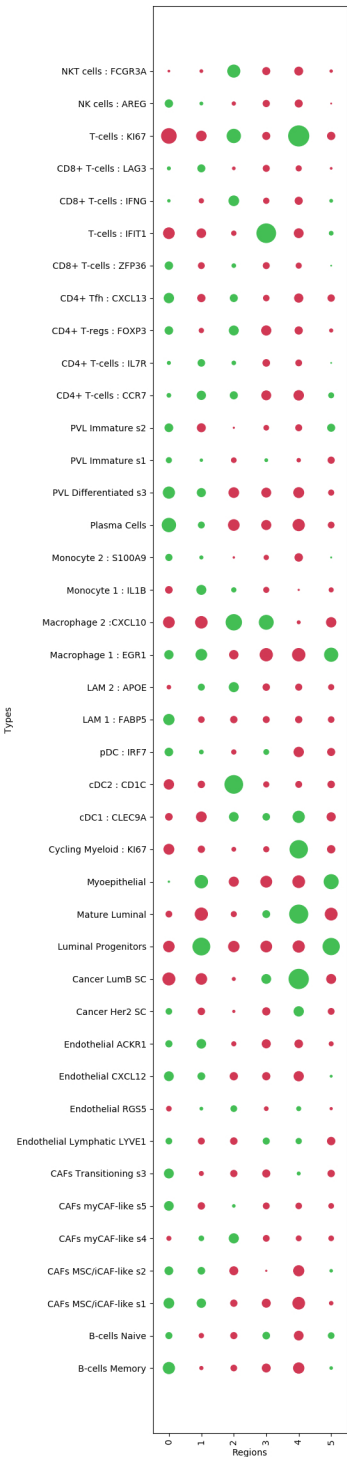

# cluster\_subset\_H2-enrichment

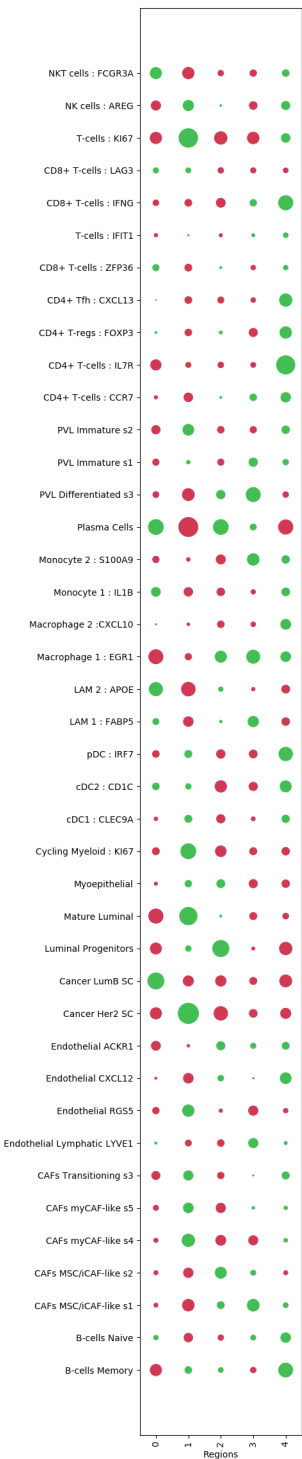

# cluster\_subset\_E1-enrichment

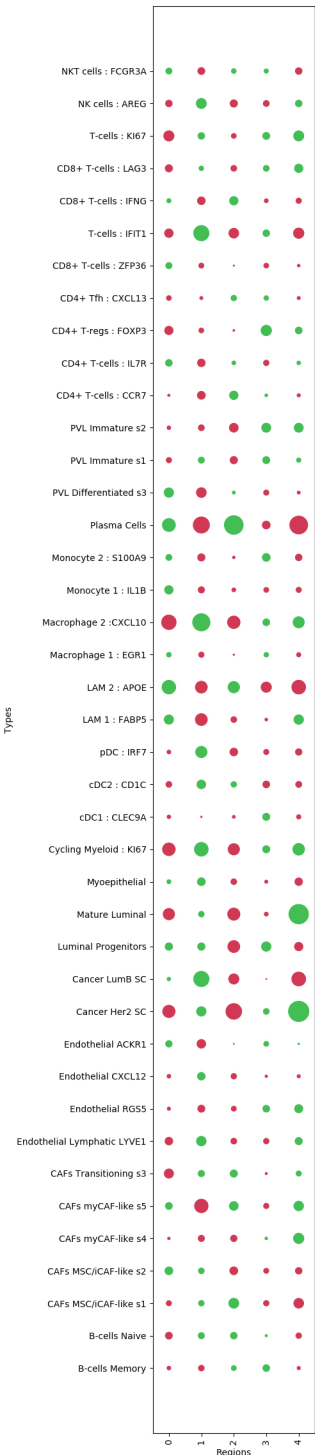

# cluster\_subset\_A2-enrichment

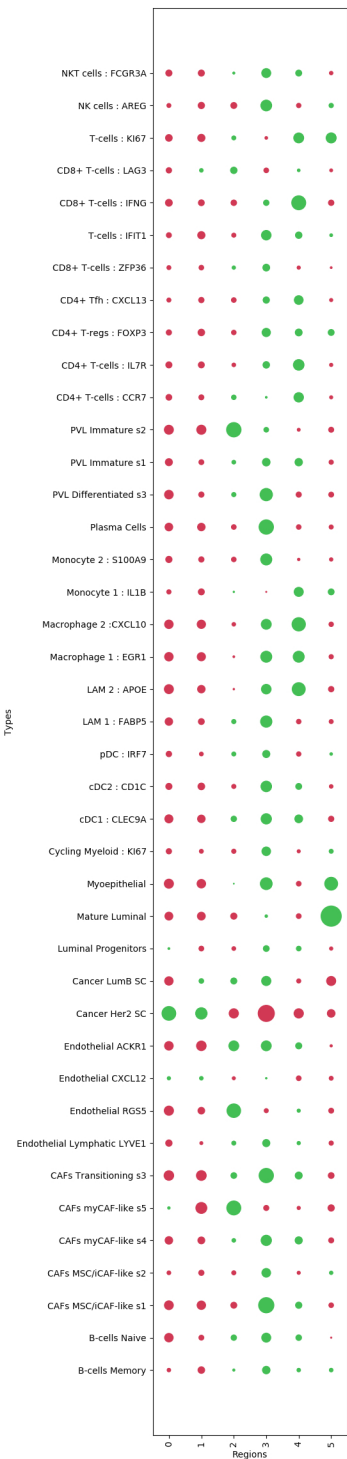



# cluster\_subset\_A6-enrichment

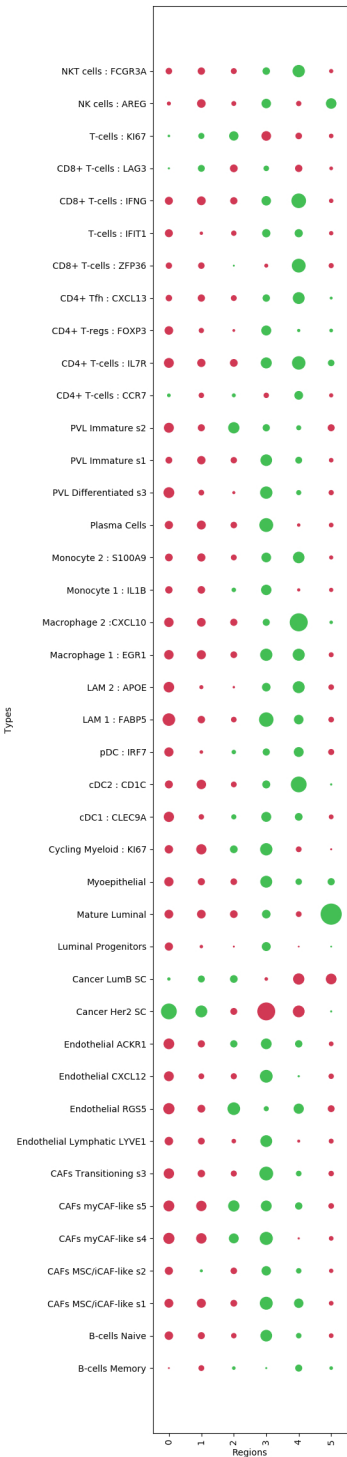

# cluster\_subset\_D4-enrichment

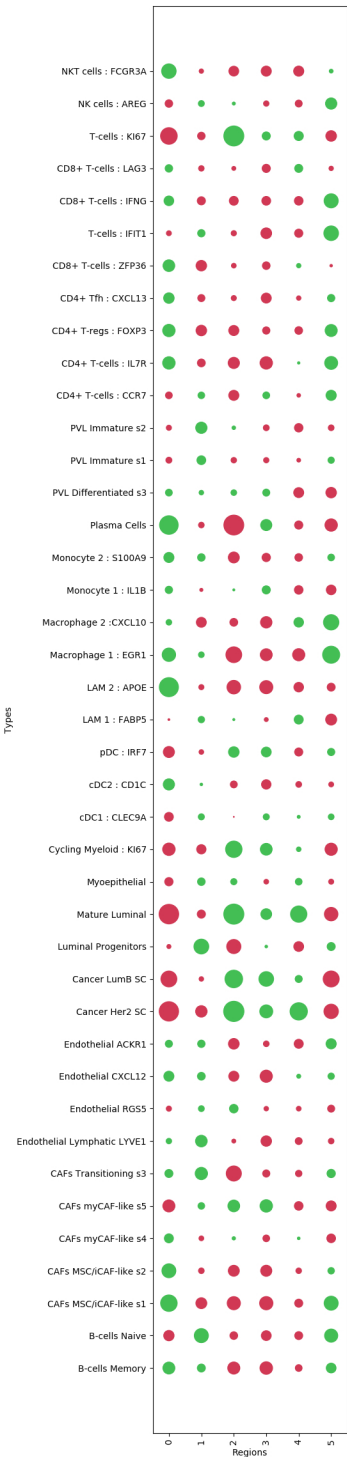

# cluster\_subset\_D5-enrichment

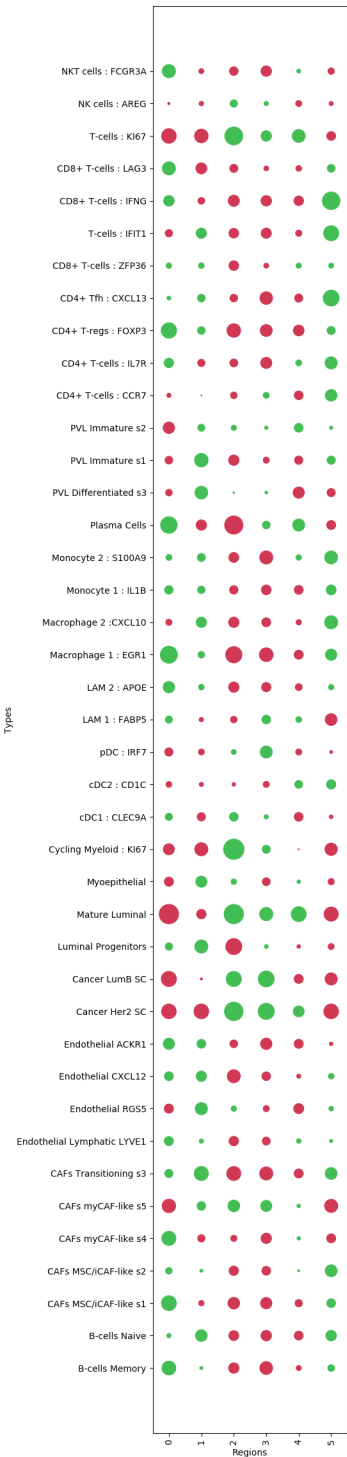

# cluster\_subset\_H3-enrichment

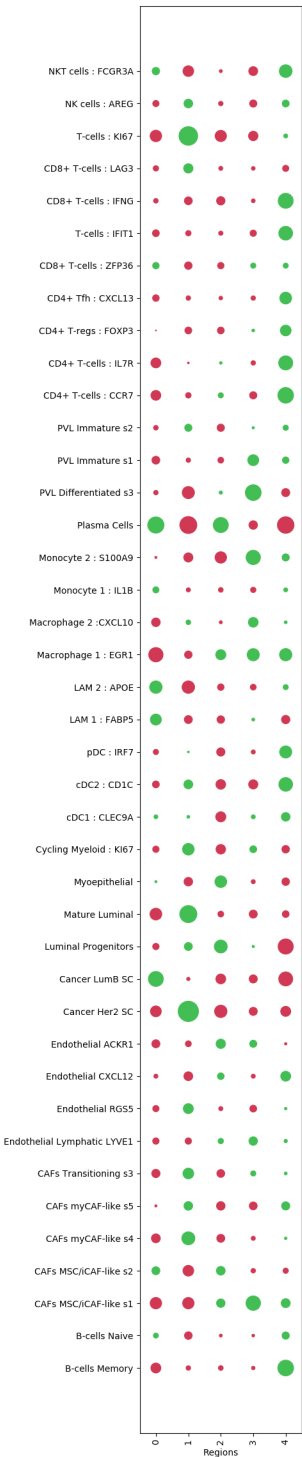

# cluster\_major\_C6-enrichment

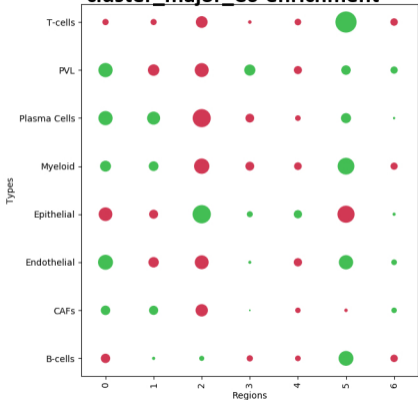

# cluster\_major\_C4-enrichment

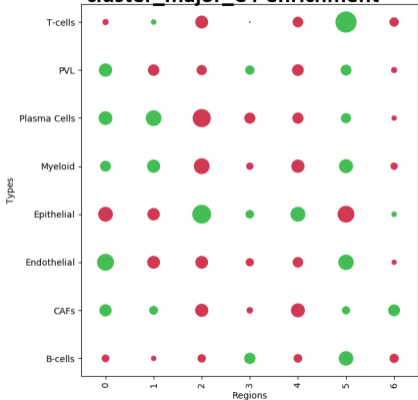

# cluster\_major\_C3-enrichment

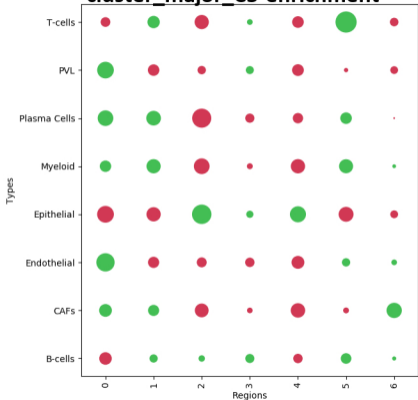

# cluster\_major\_A3-enrichment

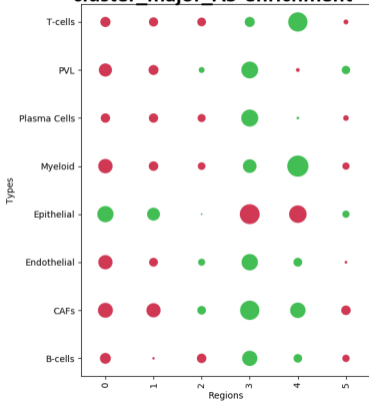



# cluster\_major\_H1-enrichment

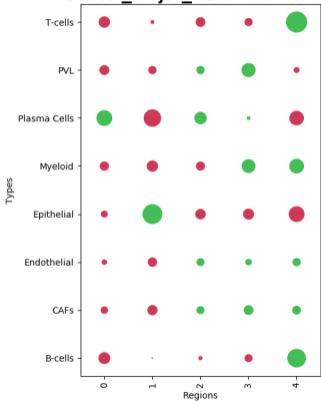

# cluster\_major\_B4-enrichment

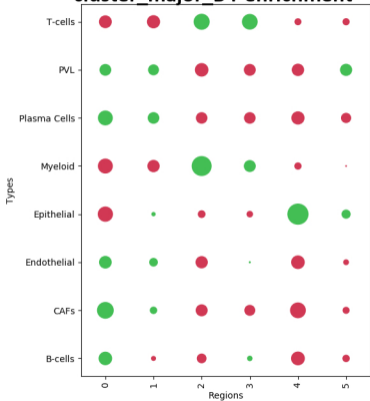

# cluster\_major\_B1-enrichment

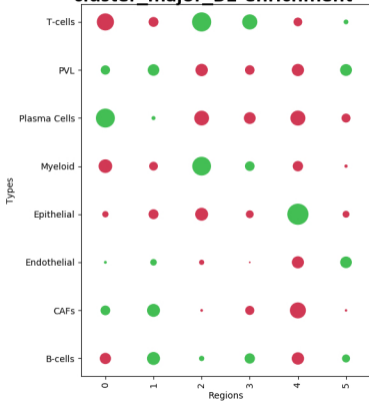

# cluster\_major\_C2-enrichment

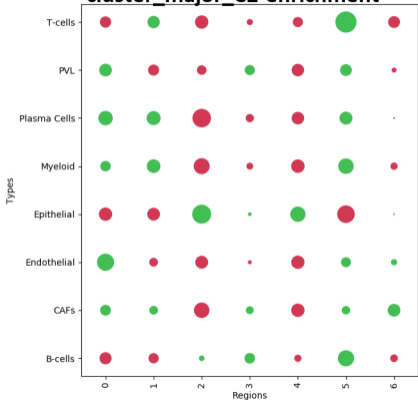

# cluster\_major\_A4-enrichment

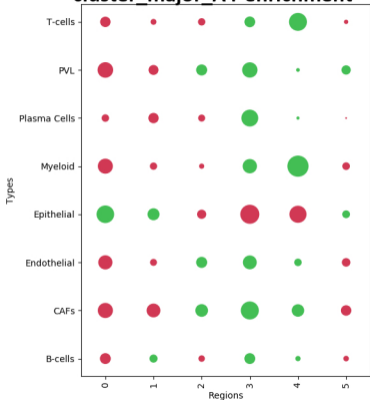

# cluster\_major\_F1-enrichment

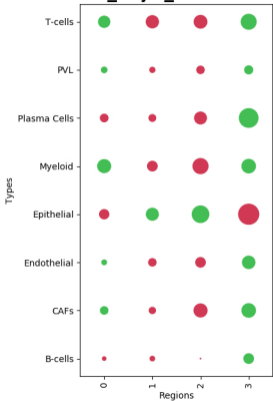

# cluster\_major\_D6-enrichment

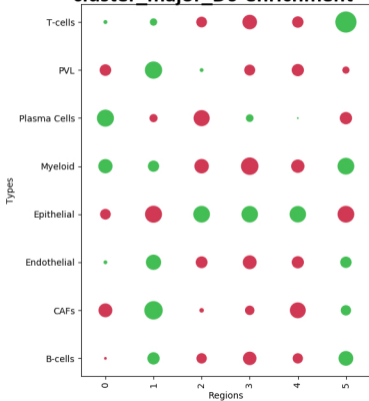

# cluster\_major\_G1-enrichment

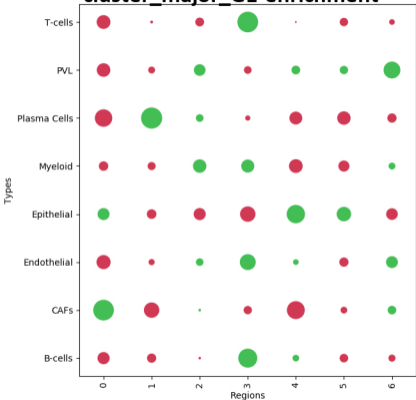



# cluster\_major\_C5-enrichment

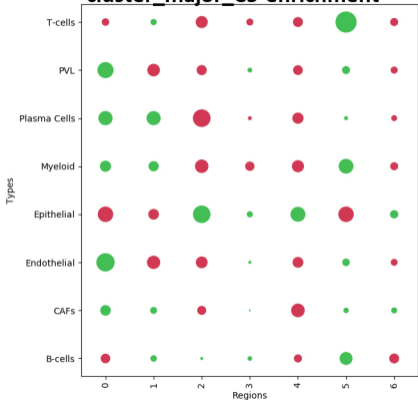

# cluster\_major\_C1-enrichment

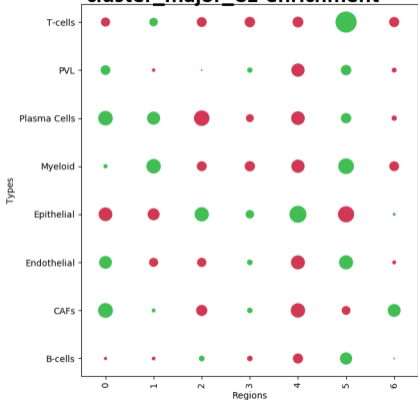

# cluster\_major\_B6-enrichment

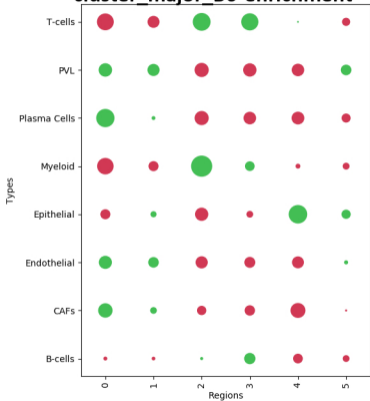

# cluster\_major\_E3-enrichment

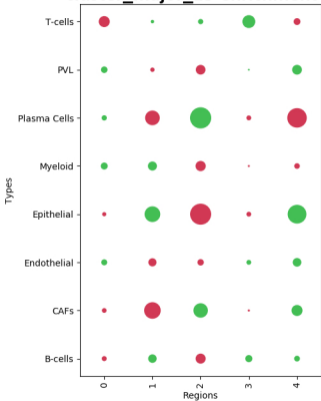

# cluster\_major\_D2-enrichment

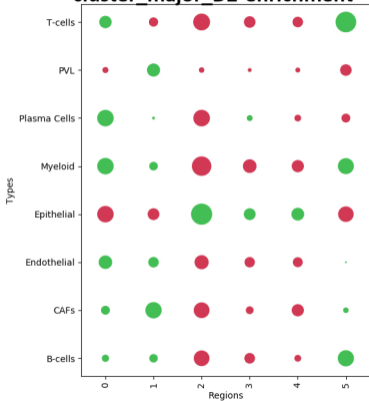

# cluster\_major\_D3-enrichment

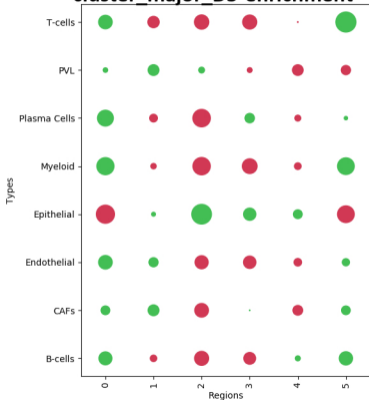

# cluster\_major\_G2-enrichment

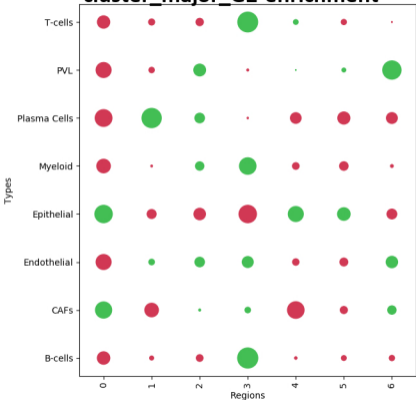

# cluster\_major\_B3-enrichment

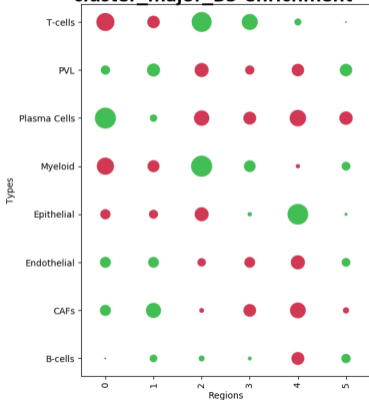



# cluster\_major\_F2-enrichment

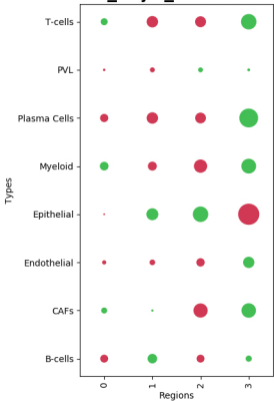

# cluster\_major\_F3-enrichment

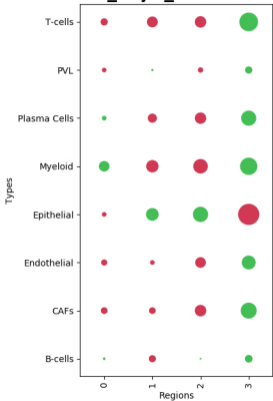

# cluster\_major\_D1-enrichment

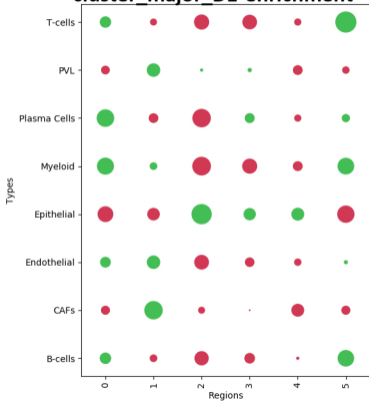

# cluster\_major\_A1-enrichment

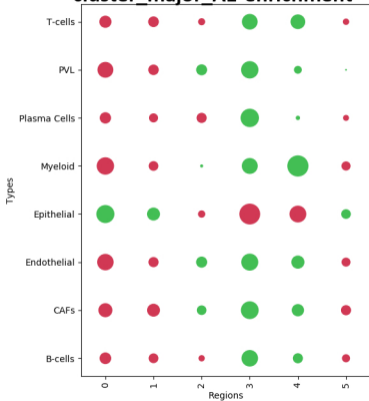

# cluster\_major\_B5-enrichment

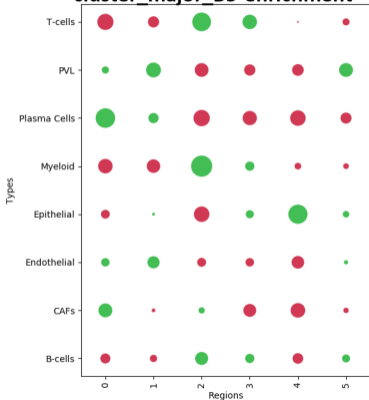

# cluster\_major\_E2-enrichment

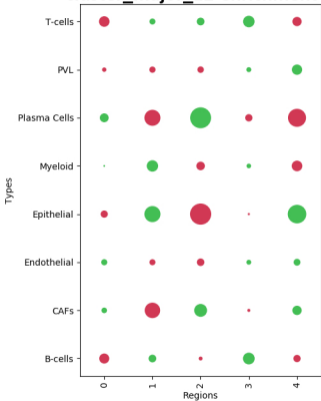

# cluster\_major\_A5-enrichment

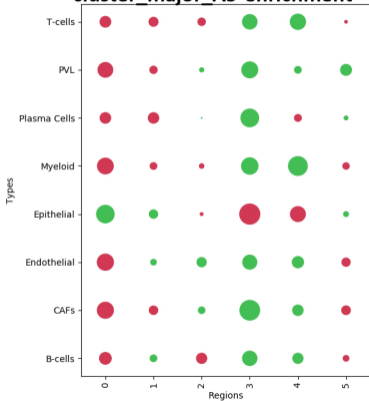

# cluster\_major\_G3-enrichment

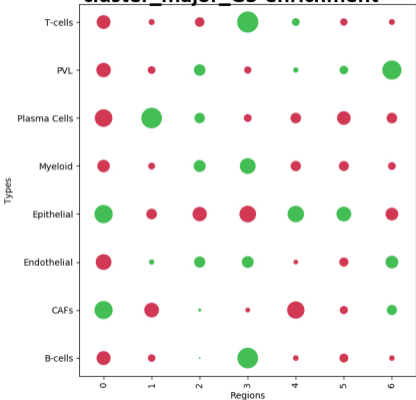



# cluster\_major\_B2-enrichment

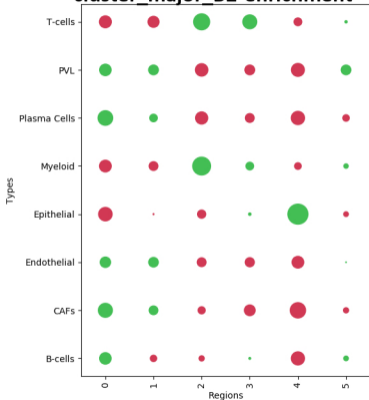

# cluster\_major\_H2-enrichment

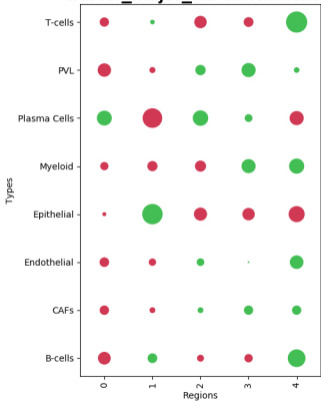

# cluster\_major\_E1-enrichment

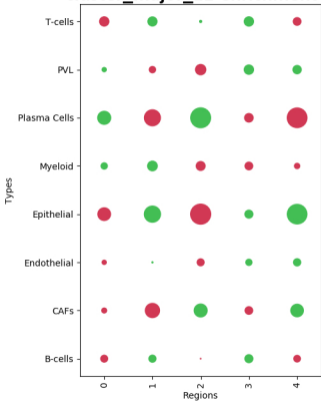

# cluster\_major\_A2-enrichment

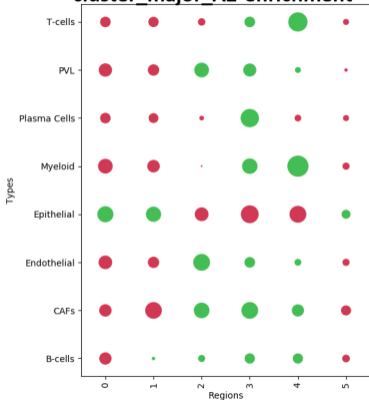

# cluster\_major\_A6-enrichment

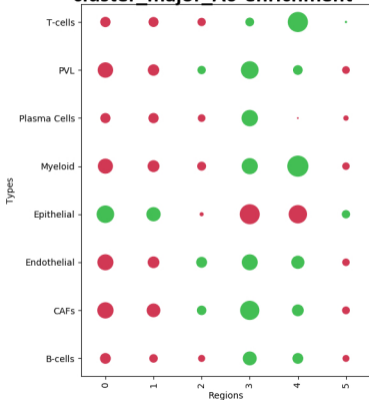

# cluster\_major\_D4-enrichment

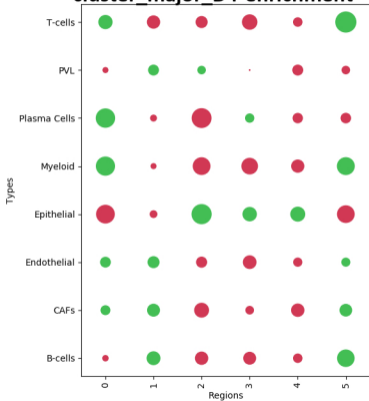

# cluster\_major\_D5-enrichment

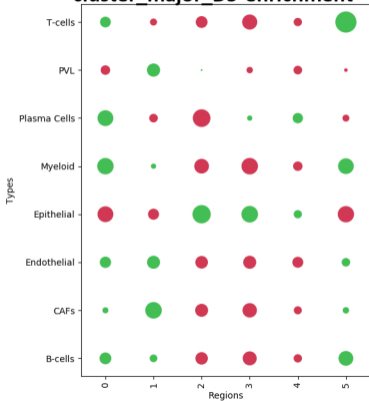

# cluster\_major\_H3-enrichment

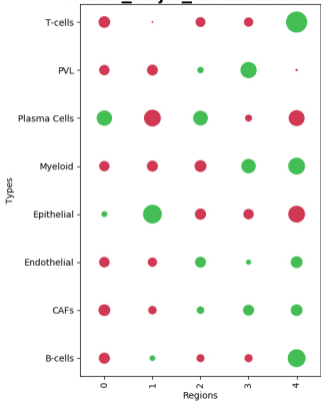



# cluster\_minor\_C6-enrichment

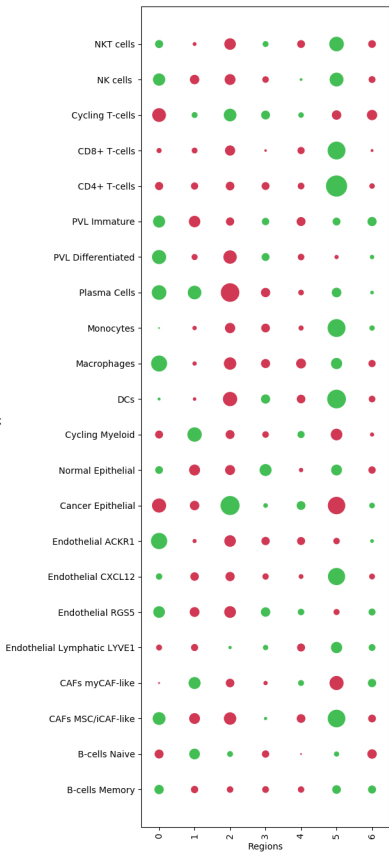

# cluster\_minor\_C4-enrichment

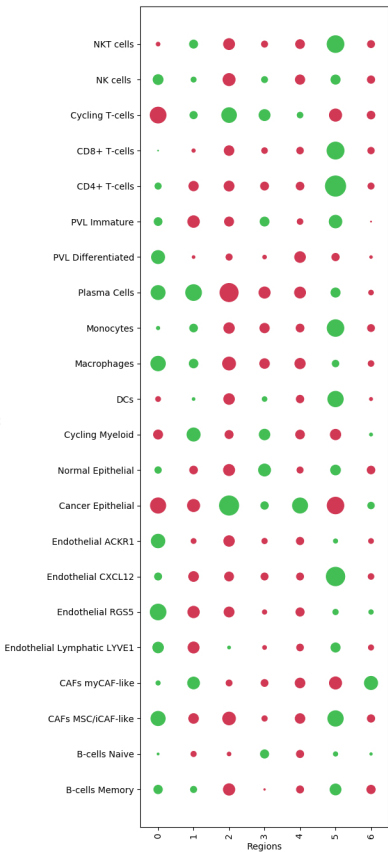

# cluster\_minor\_C3-enrichment

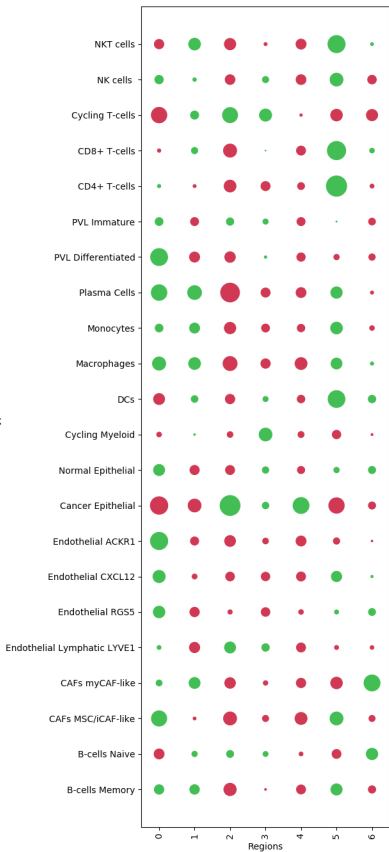

# cluster\_minor\_A3-enrichment

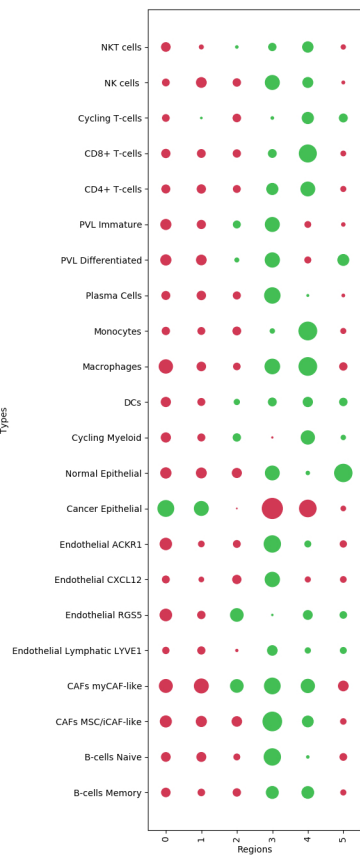

# cluster\_minor\_H1-enrichment

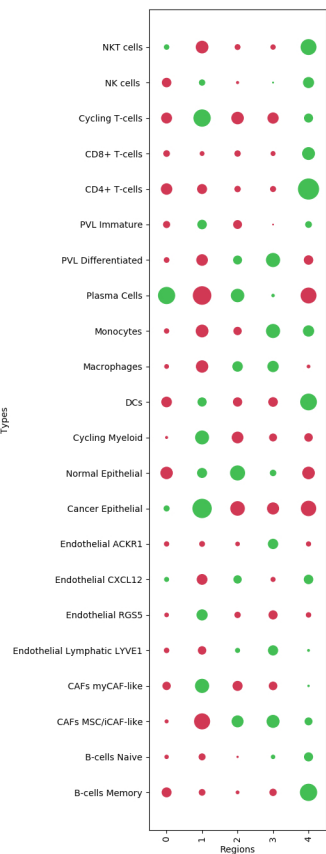

# cluster\_minor\_B4-enrichment

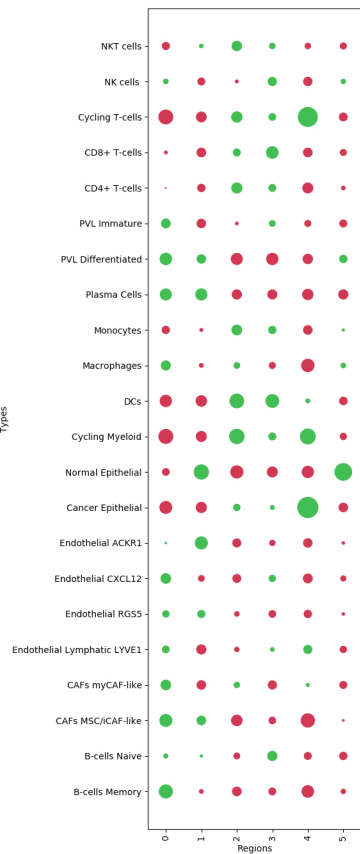

# cluster\_minor\_B1-enrichment

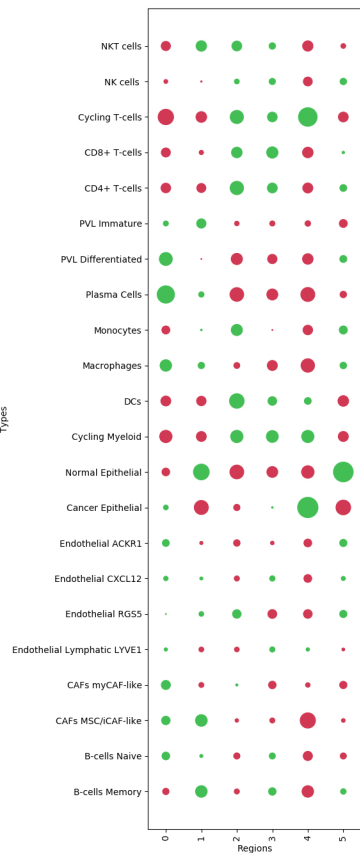

# cluster\_minor\_C2-enrichment

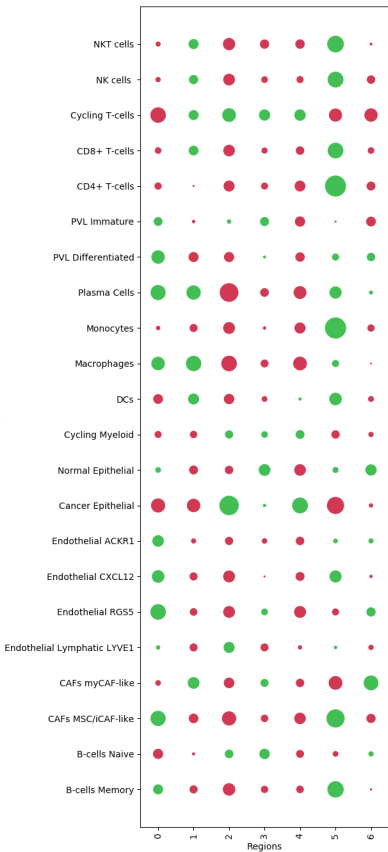



# cluster\_minor\_A4-enrichment

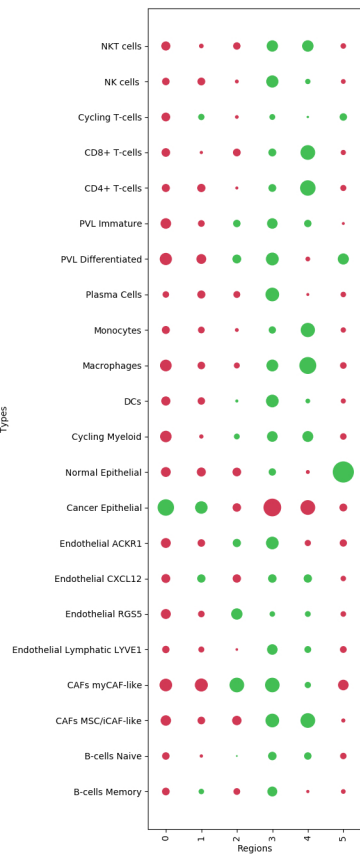

# cluster\_minor\_F1-enrichment

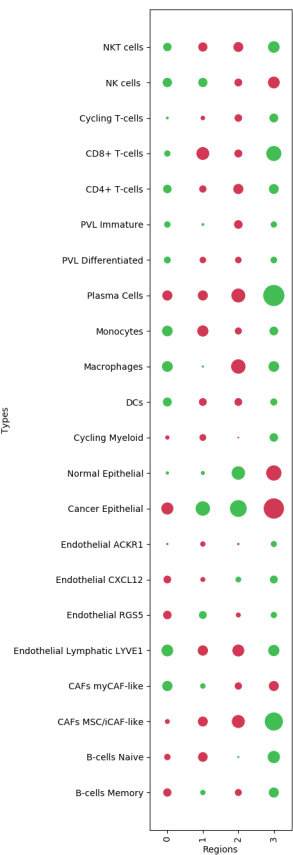

# cluster\_minor\_D6-enrichment

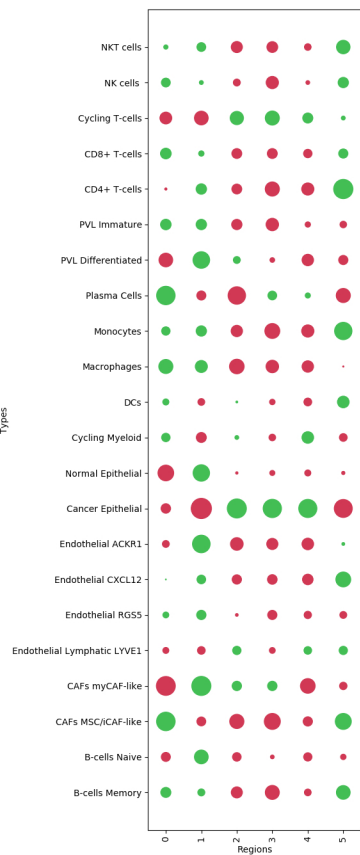

# cluster\_minor\_G1-enrichment

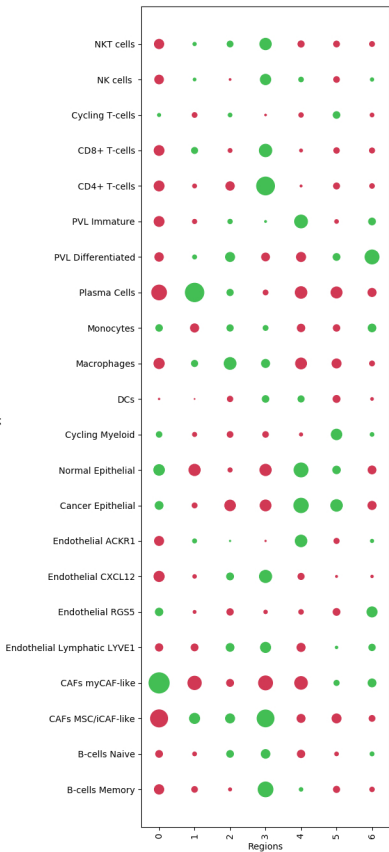

# cluster\_minor\_C5-enrichment

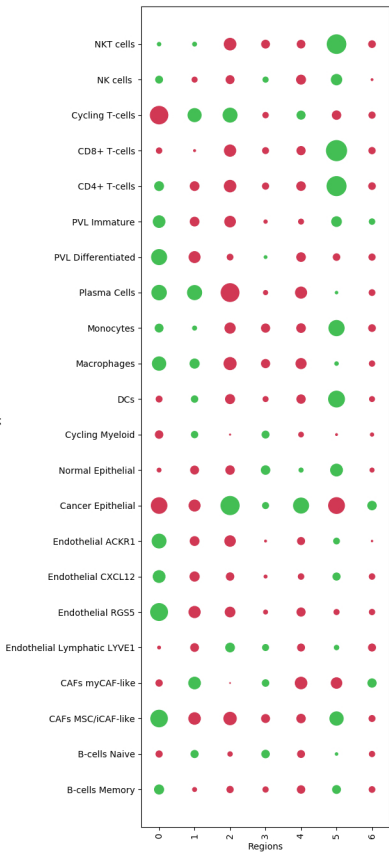

# cluster\_minor\_C1-enrichment

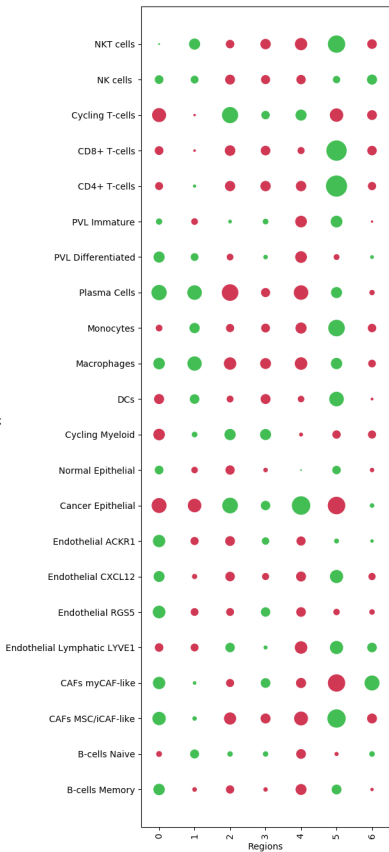

# cluster\_minor\_B6-enrichment

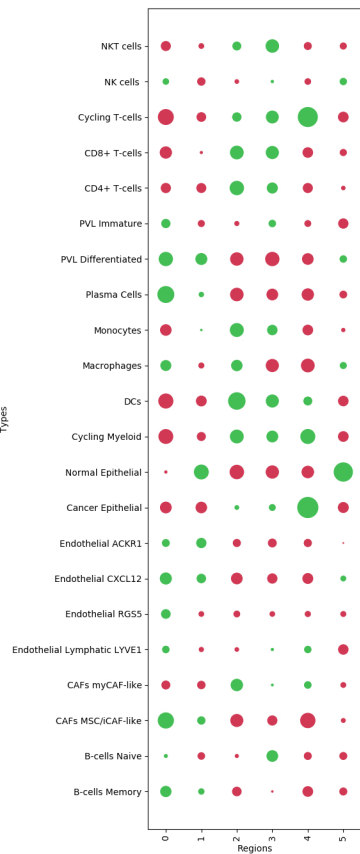

# cluster\_minor\_E3-enrichment

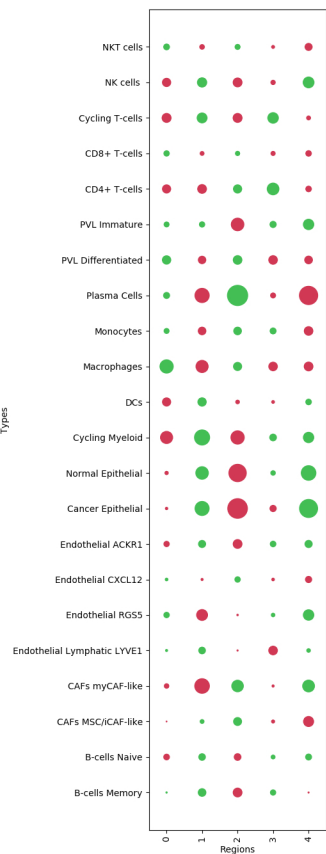



# cluster\_minor\_D2-enrichment

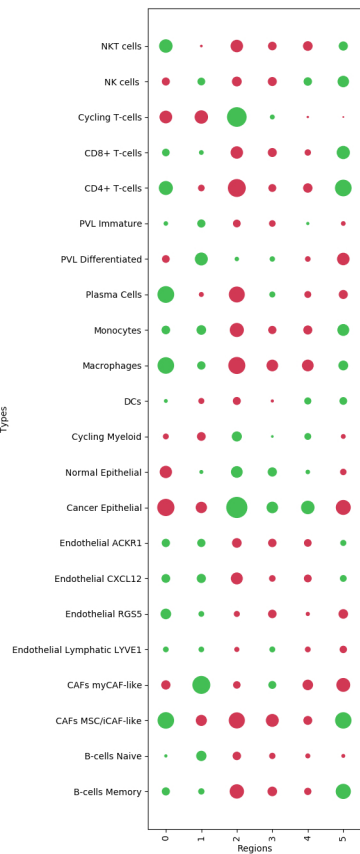

# cluster\_minor\_D3-enrichment

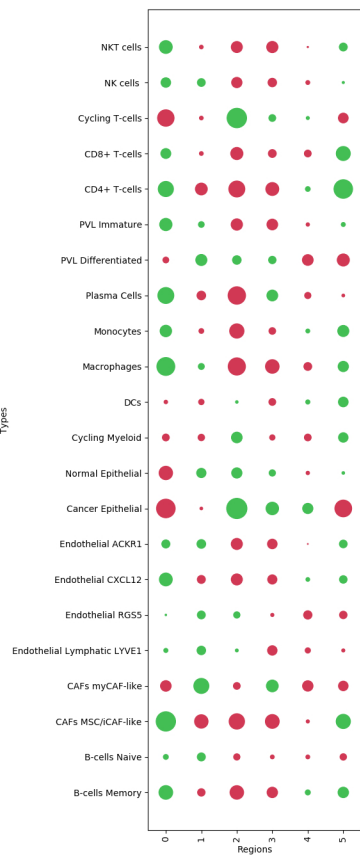

# cluster\_minor\_G2-enrichment

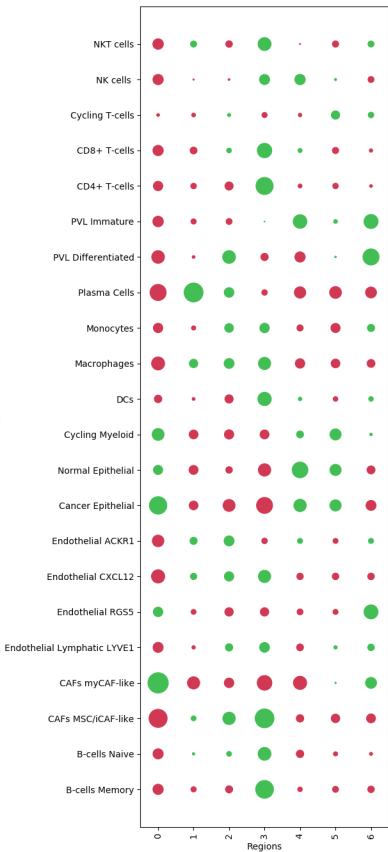

# cluster\_minor\_B3-enrichment

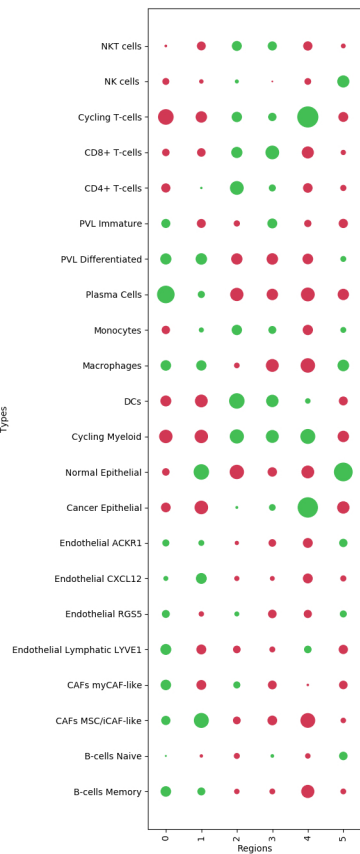

# cluster\_minor\_F2-enrichment

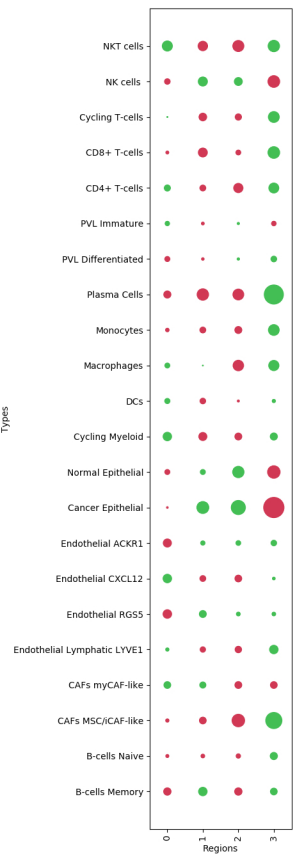

# cluster\_minor\_F3-enrichment

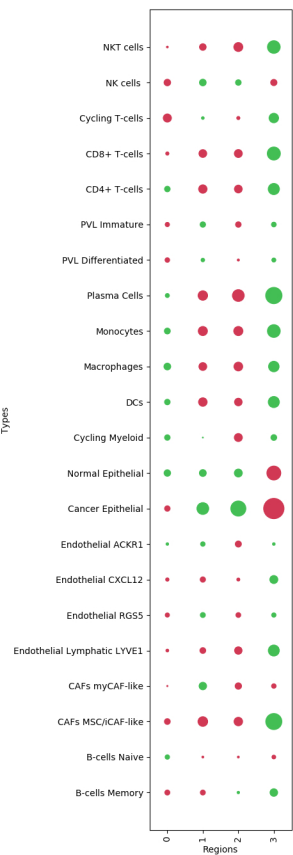

# cluster\_minor\_D1-enrichment

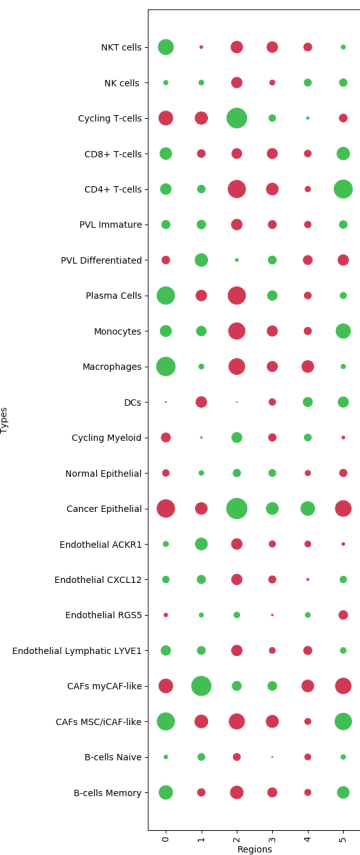

# cluster\_minor\_A1-enrichment

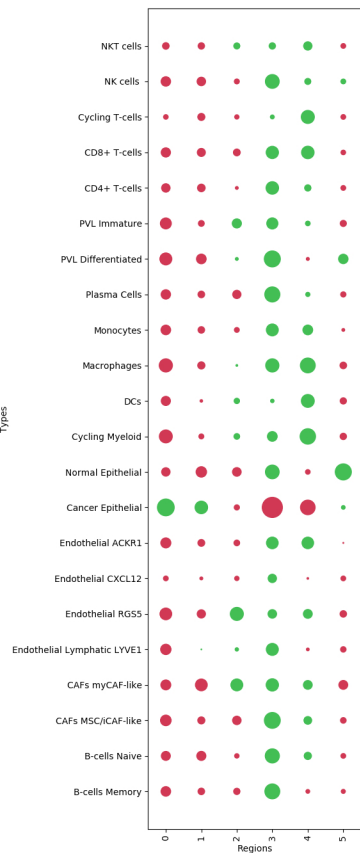



# cluster\_minor\_B5-enrichment

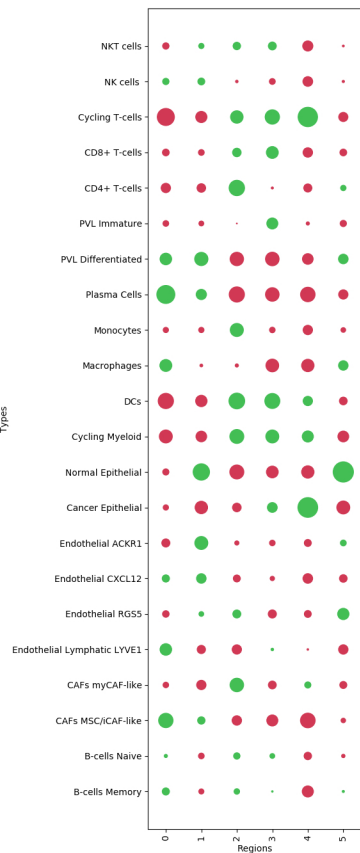

# cluster\_minor\_E2-enrichment

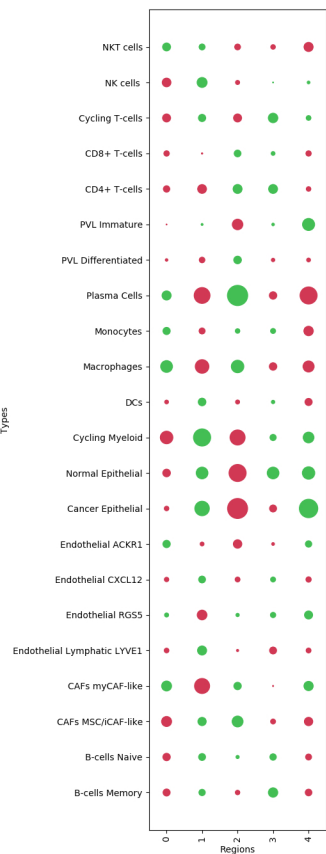

# cluster\_minor\_A5-enrichment

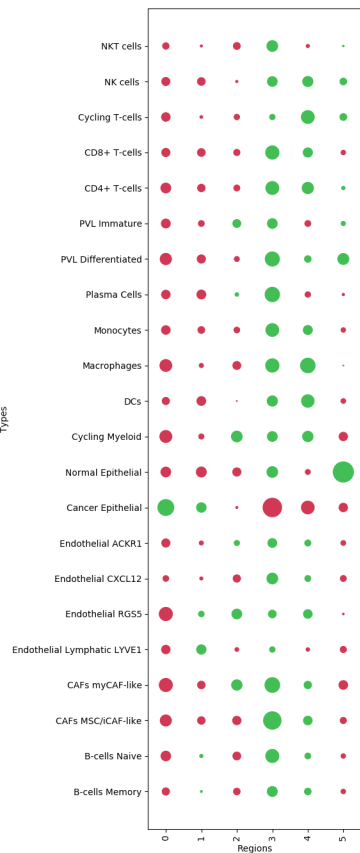

# cluster\_minor\_G3-enrichment

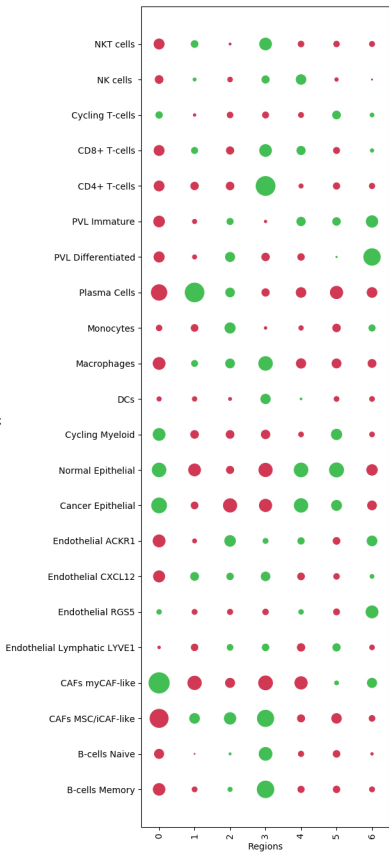

# cluster\_minor\_B2-enrichment

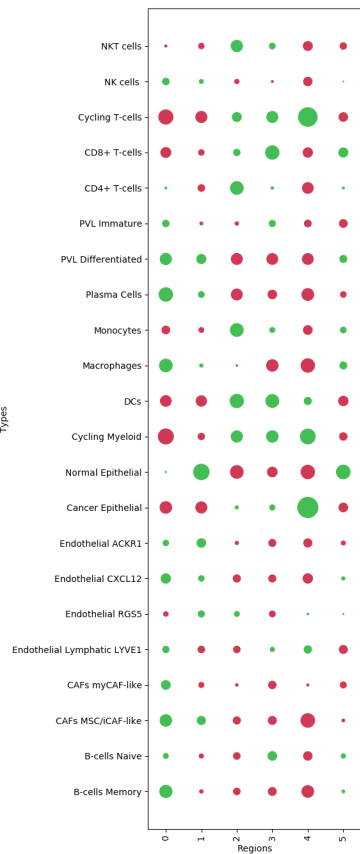

# cluster\_minor\_H2-enrichment

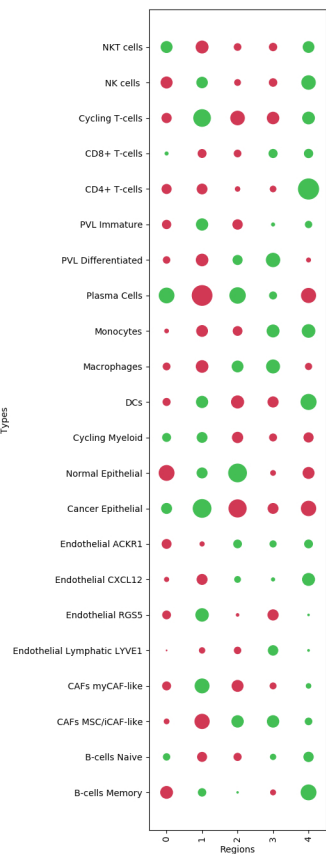

# cluster\_minor\_E1-enrichment

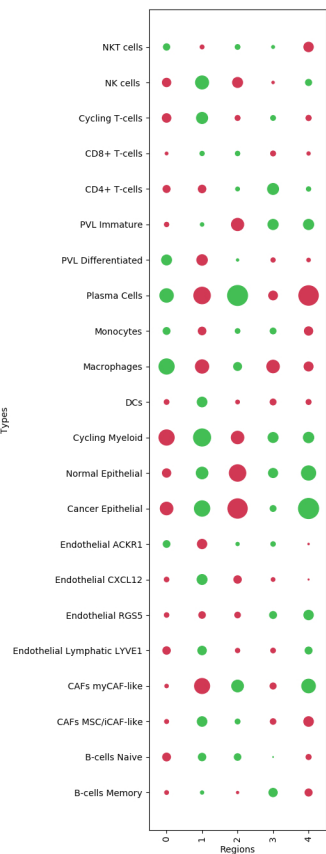

# cluster\_minor\_A2-enrichment

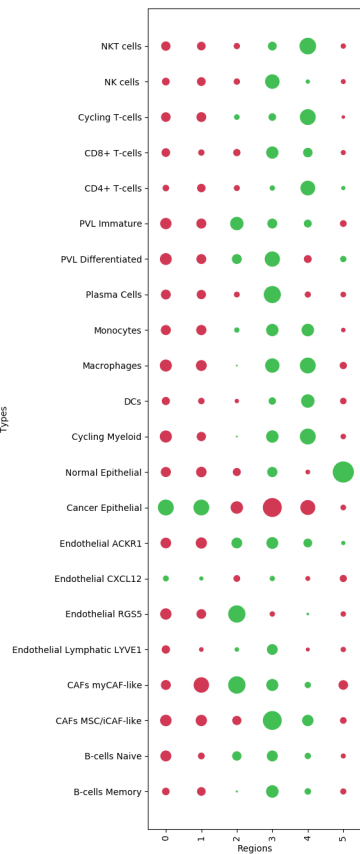



# cluster\_minor\_A6-enrichment

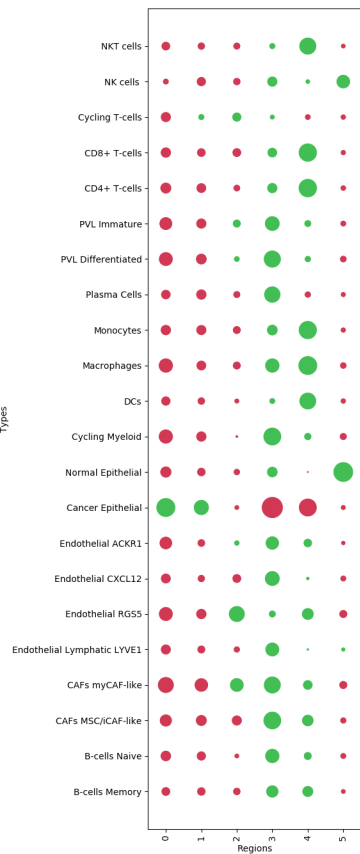

# cluster\_minor\_D4-enrichment

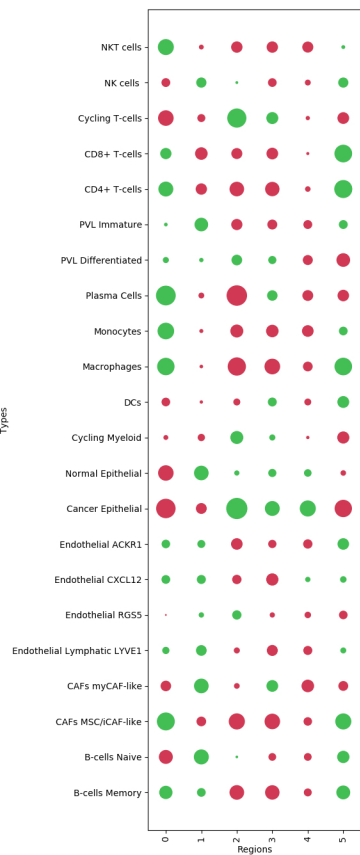

# cluster\_minor\_D5-enrichment

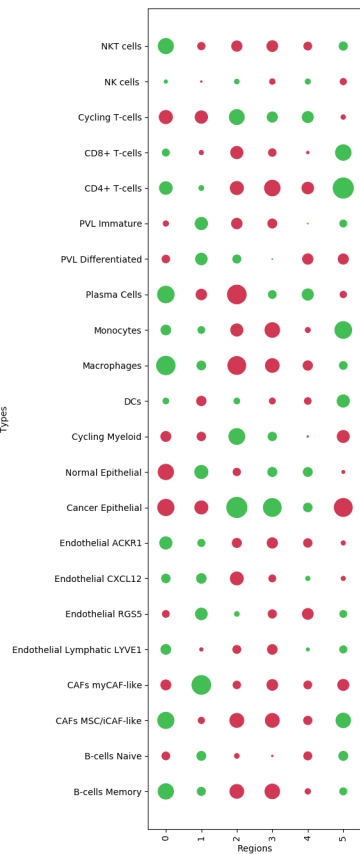

# cluster\_minor\_H3-enrichment

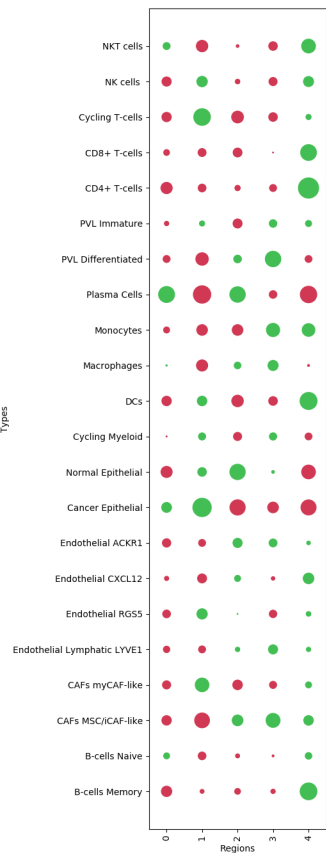

Supplement: 41467_2021_26271_MOESM12_ESM.pdf [file 41467_2021_26271_MOESM12_ESM.pdf]
