# Supplementary material for: Spatial deconvolution of HER2-positive breast cancer delineates tumor-associated cell type interactions
Source: PubMed Central journal article supplement (PMC8516894; doi:10.1038/s41467-021-26271-2), 2021-10-14

# major-C

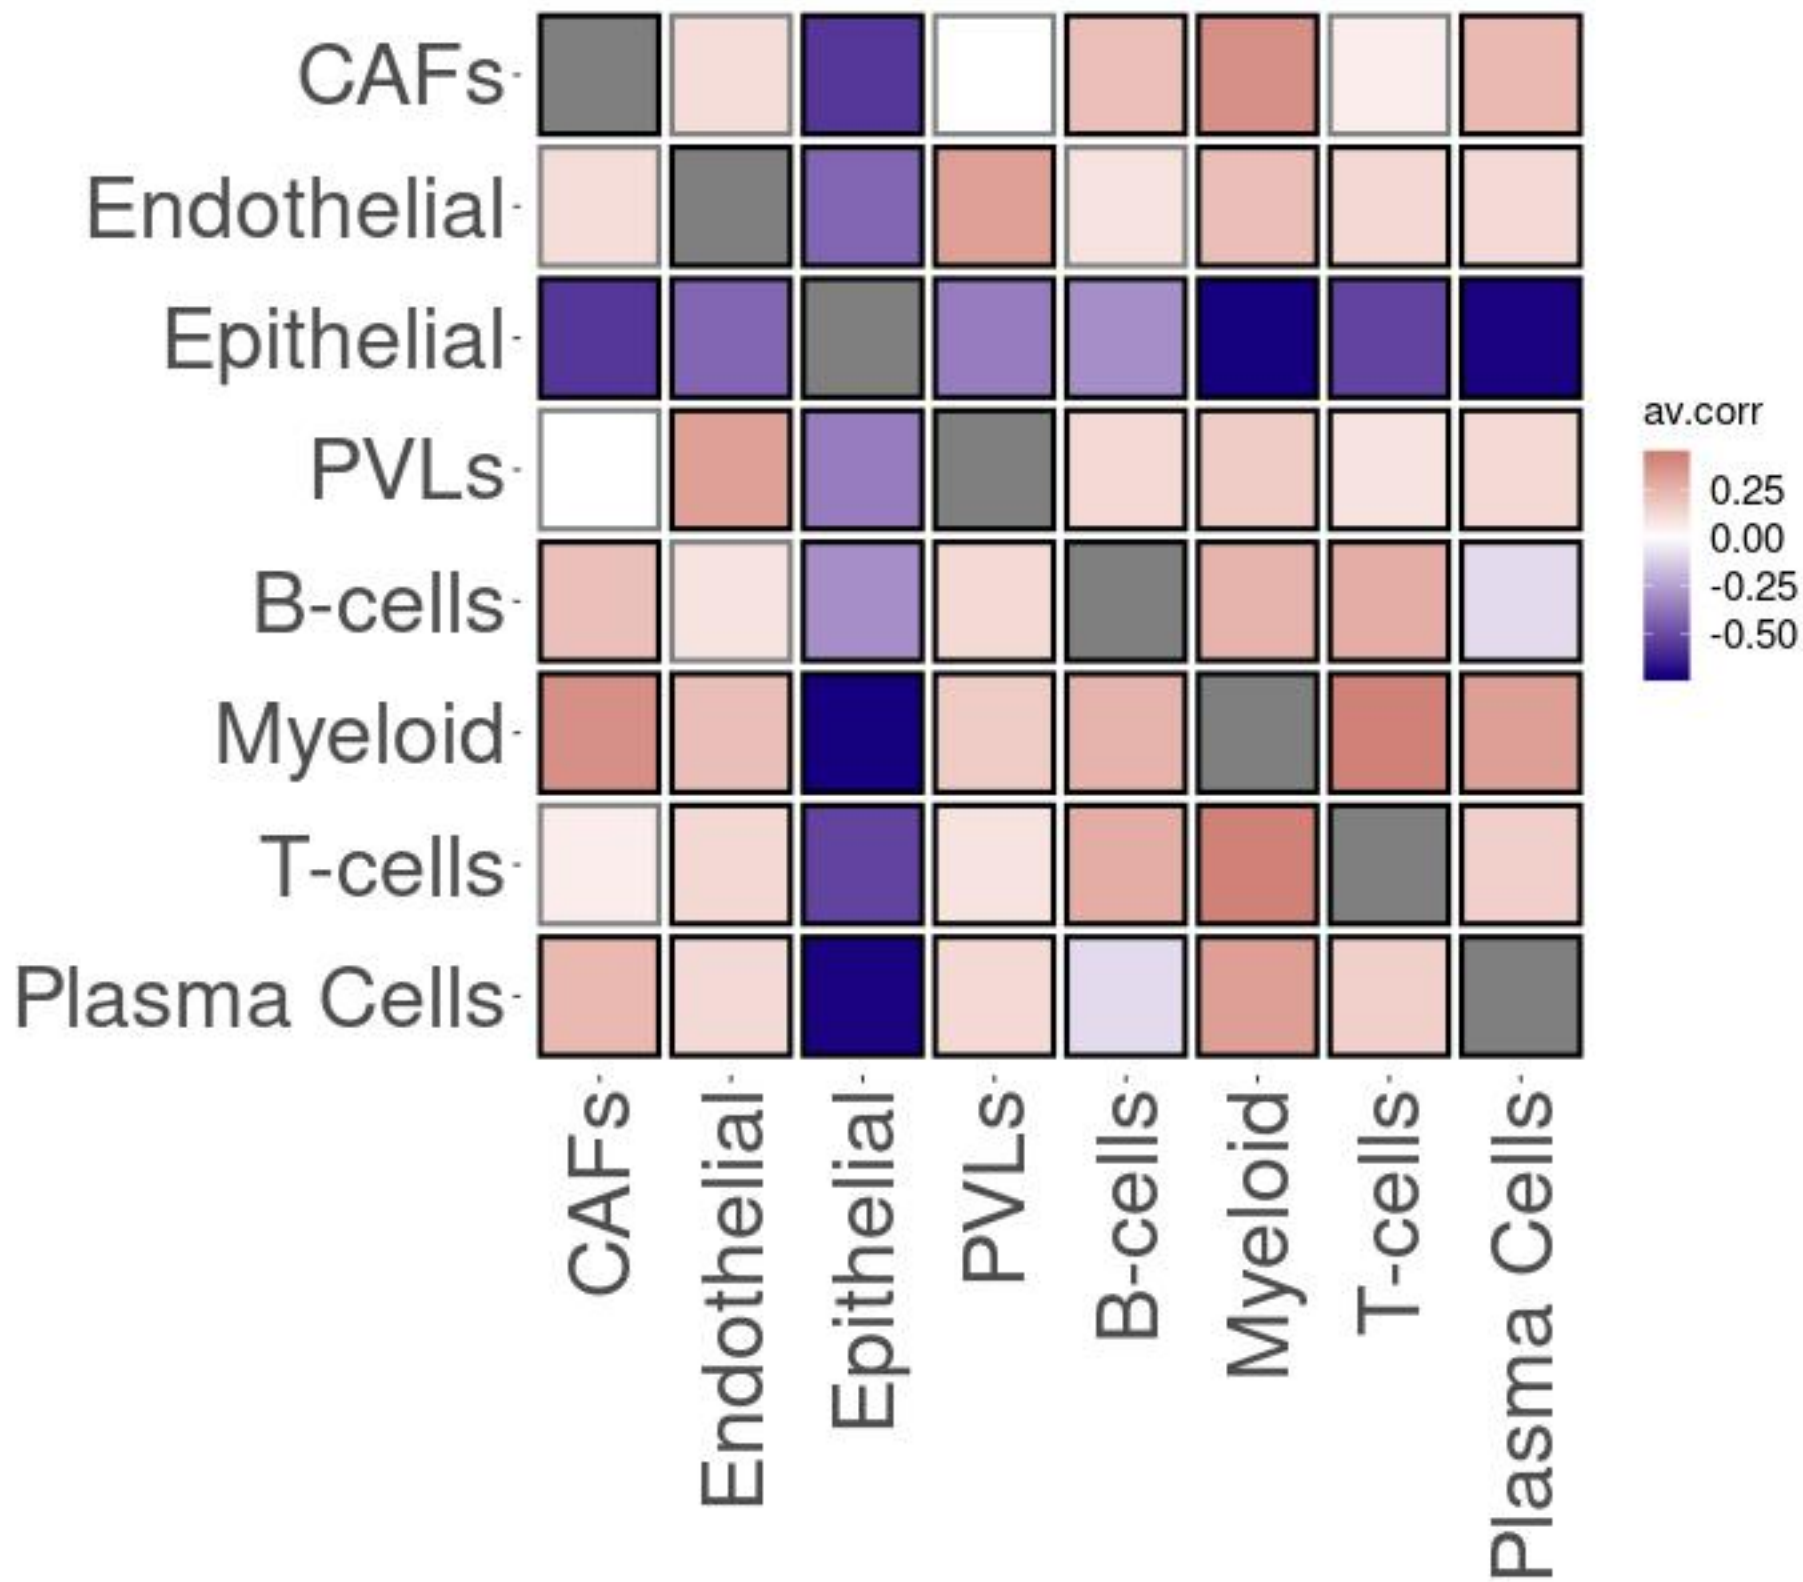

# major-H

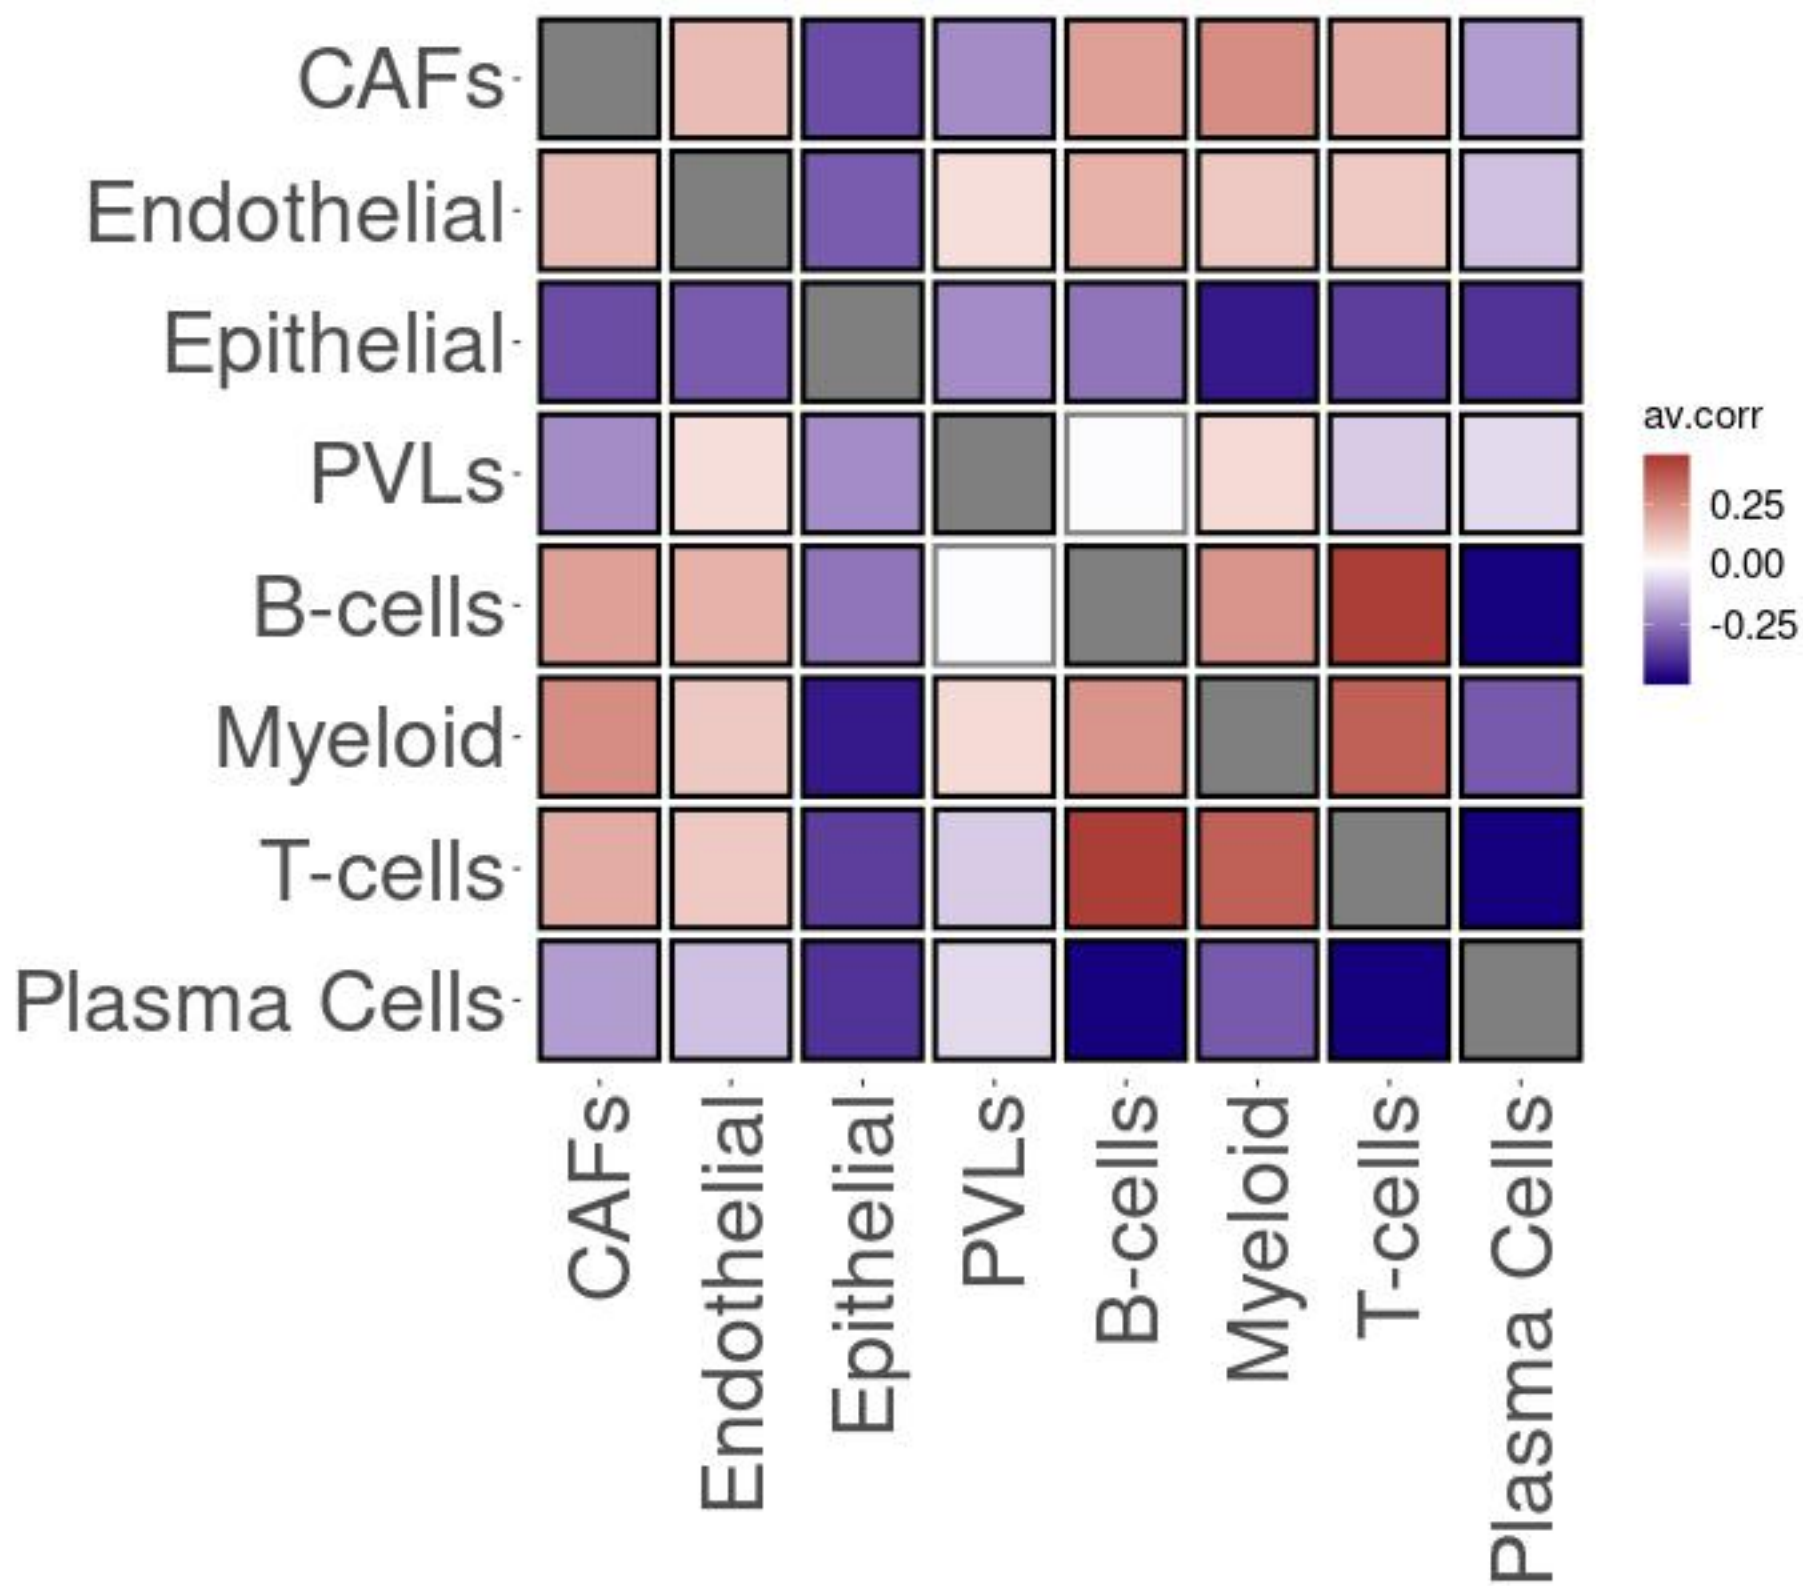

# major-E

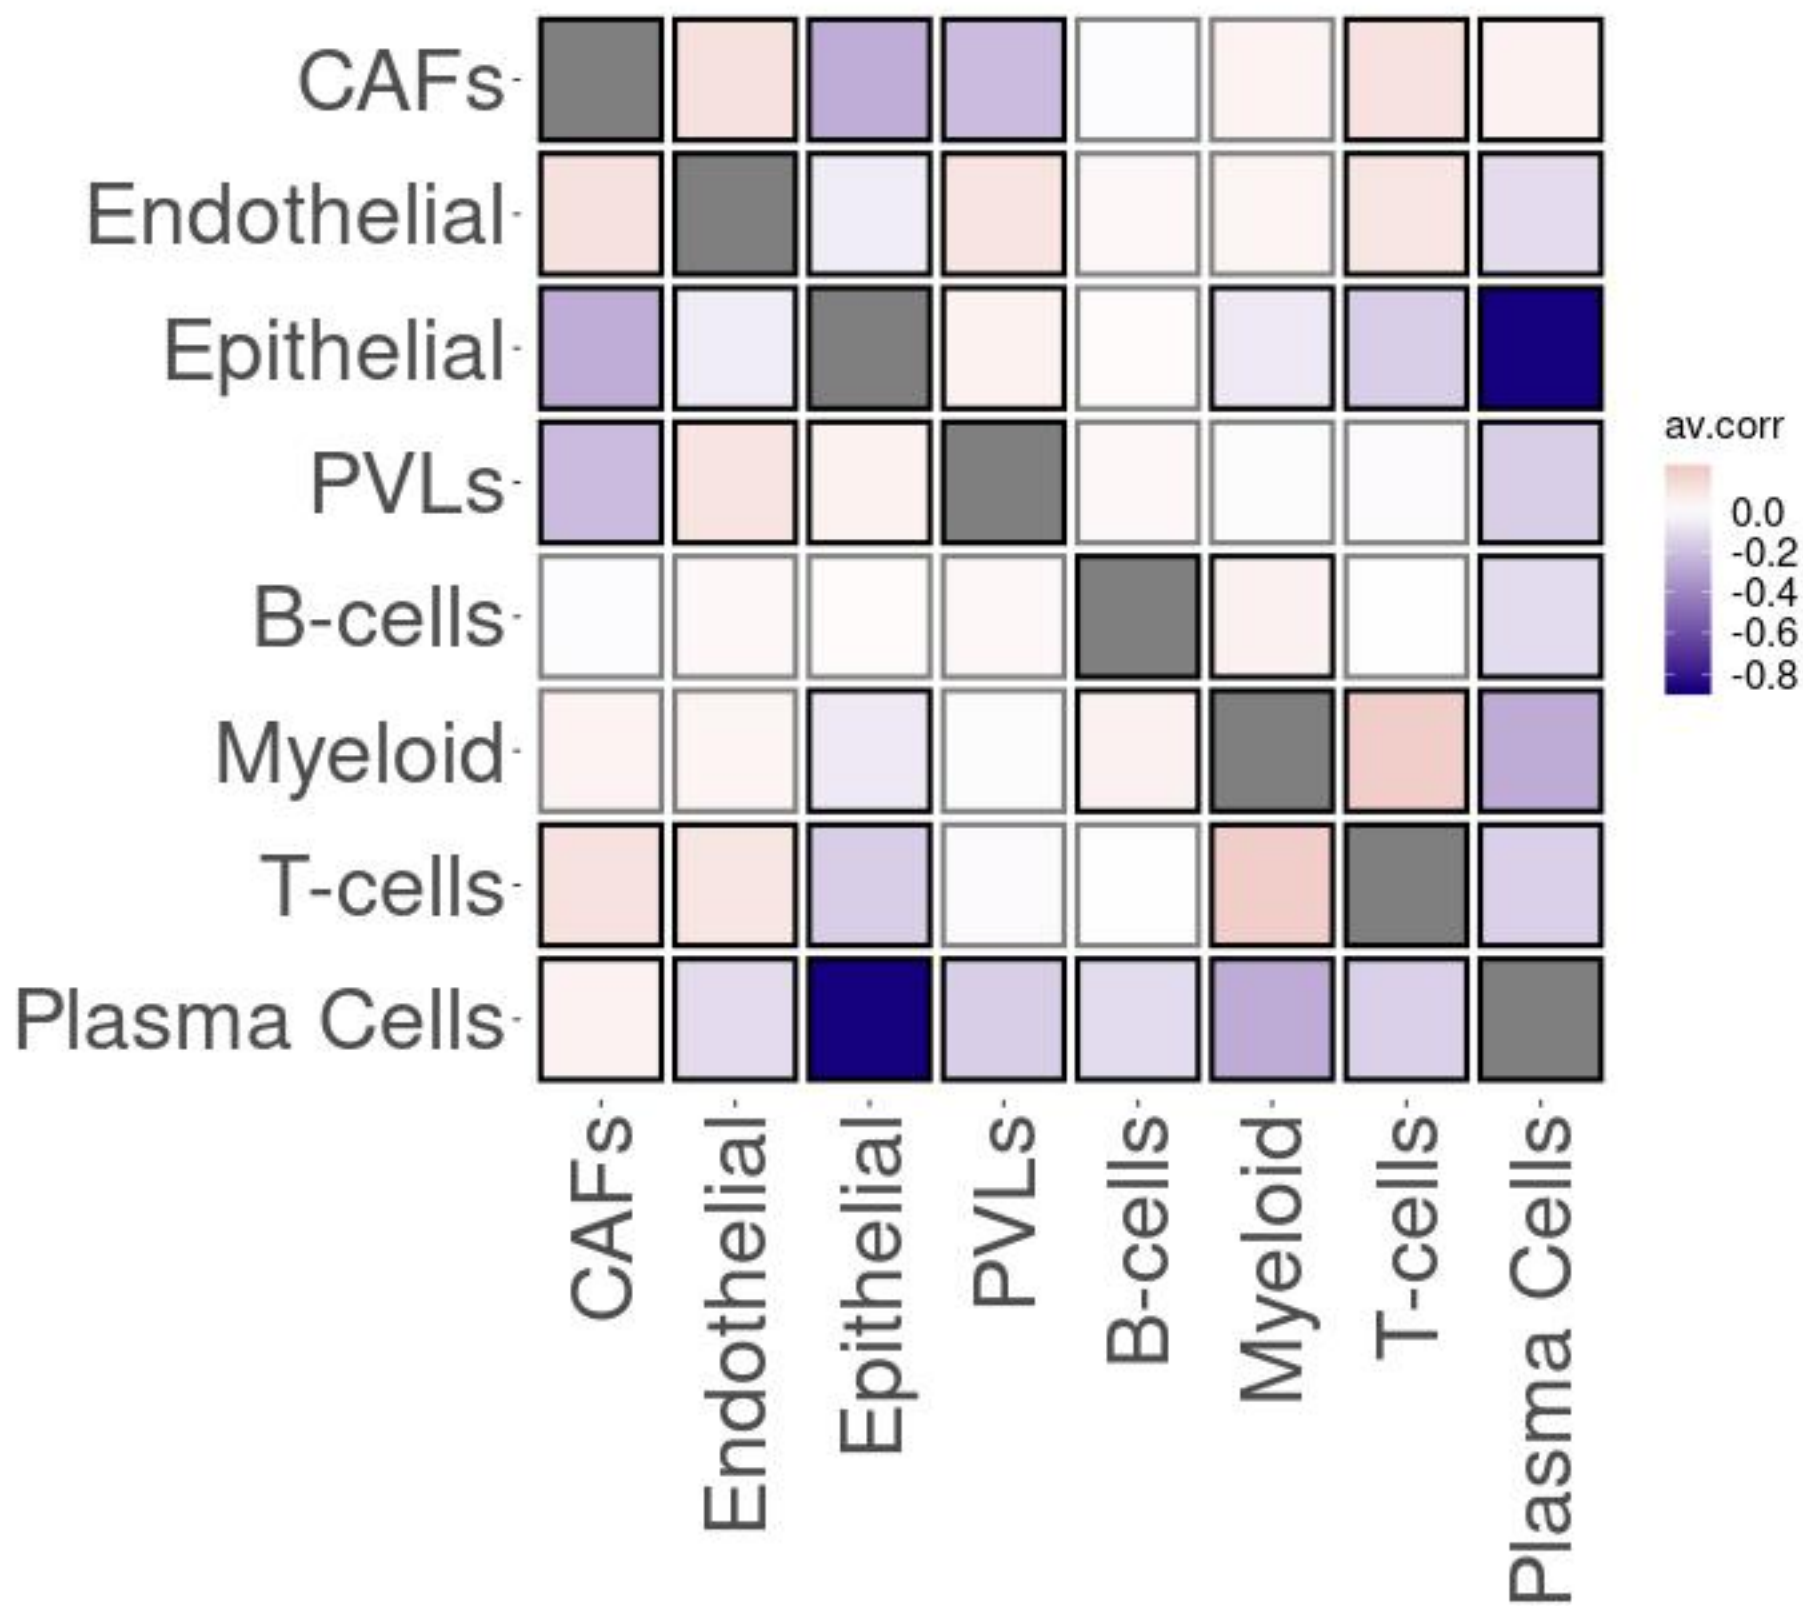

# major-G

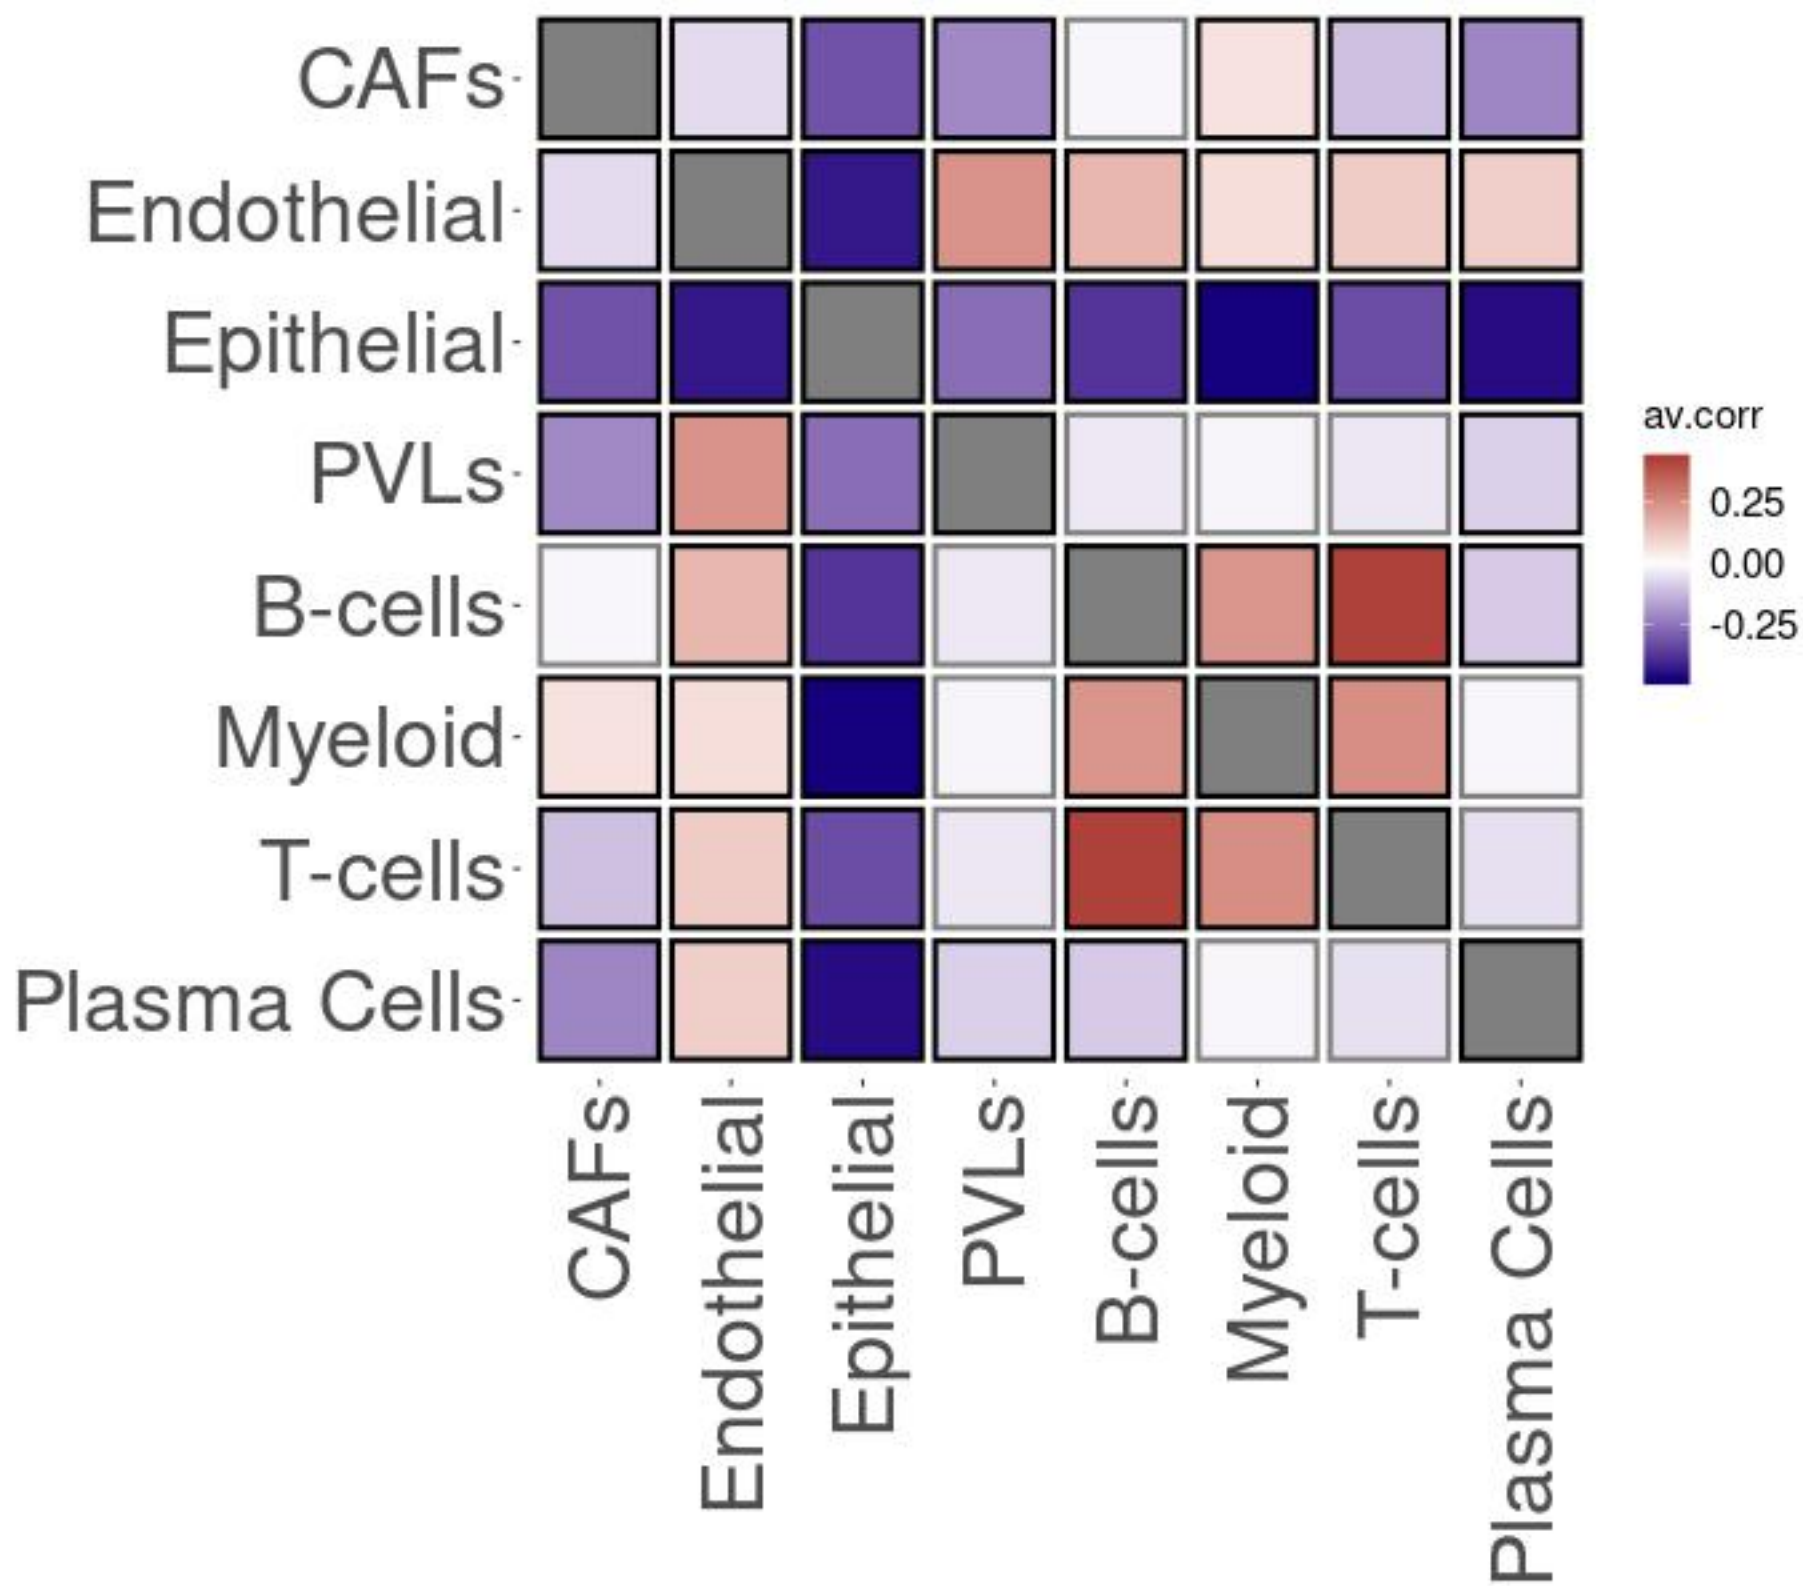

# major-B

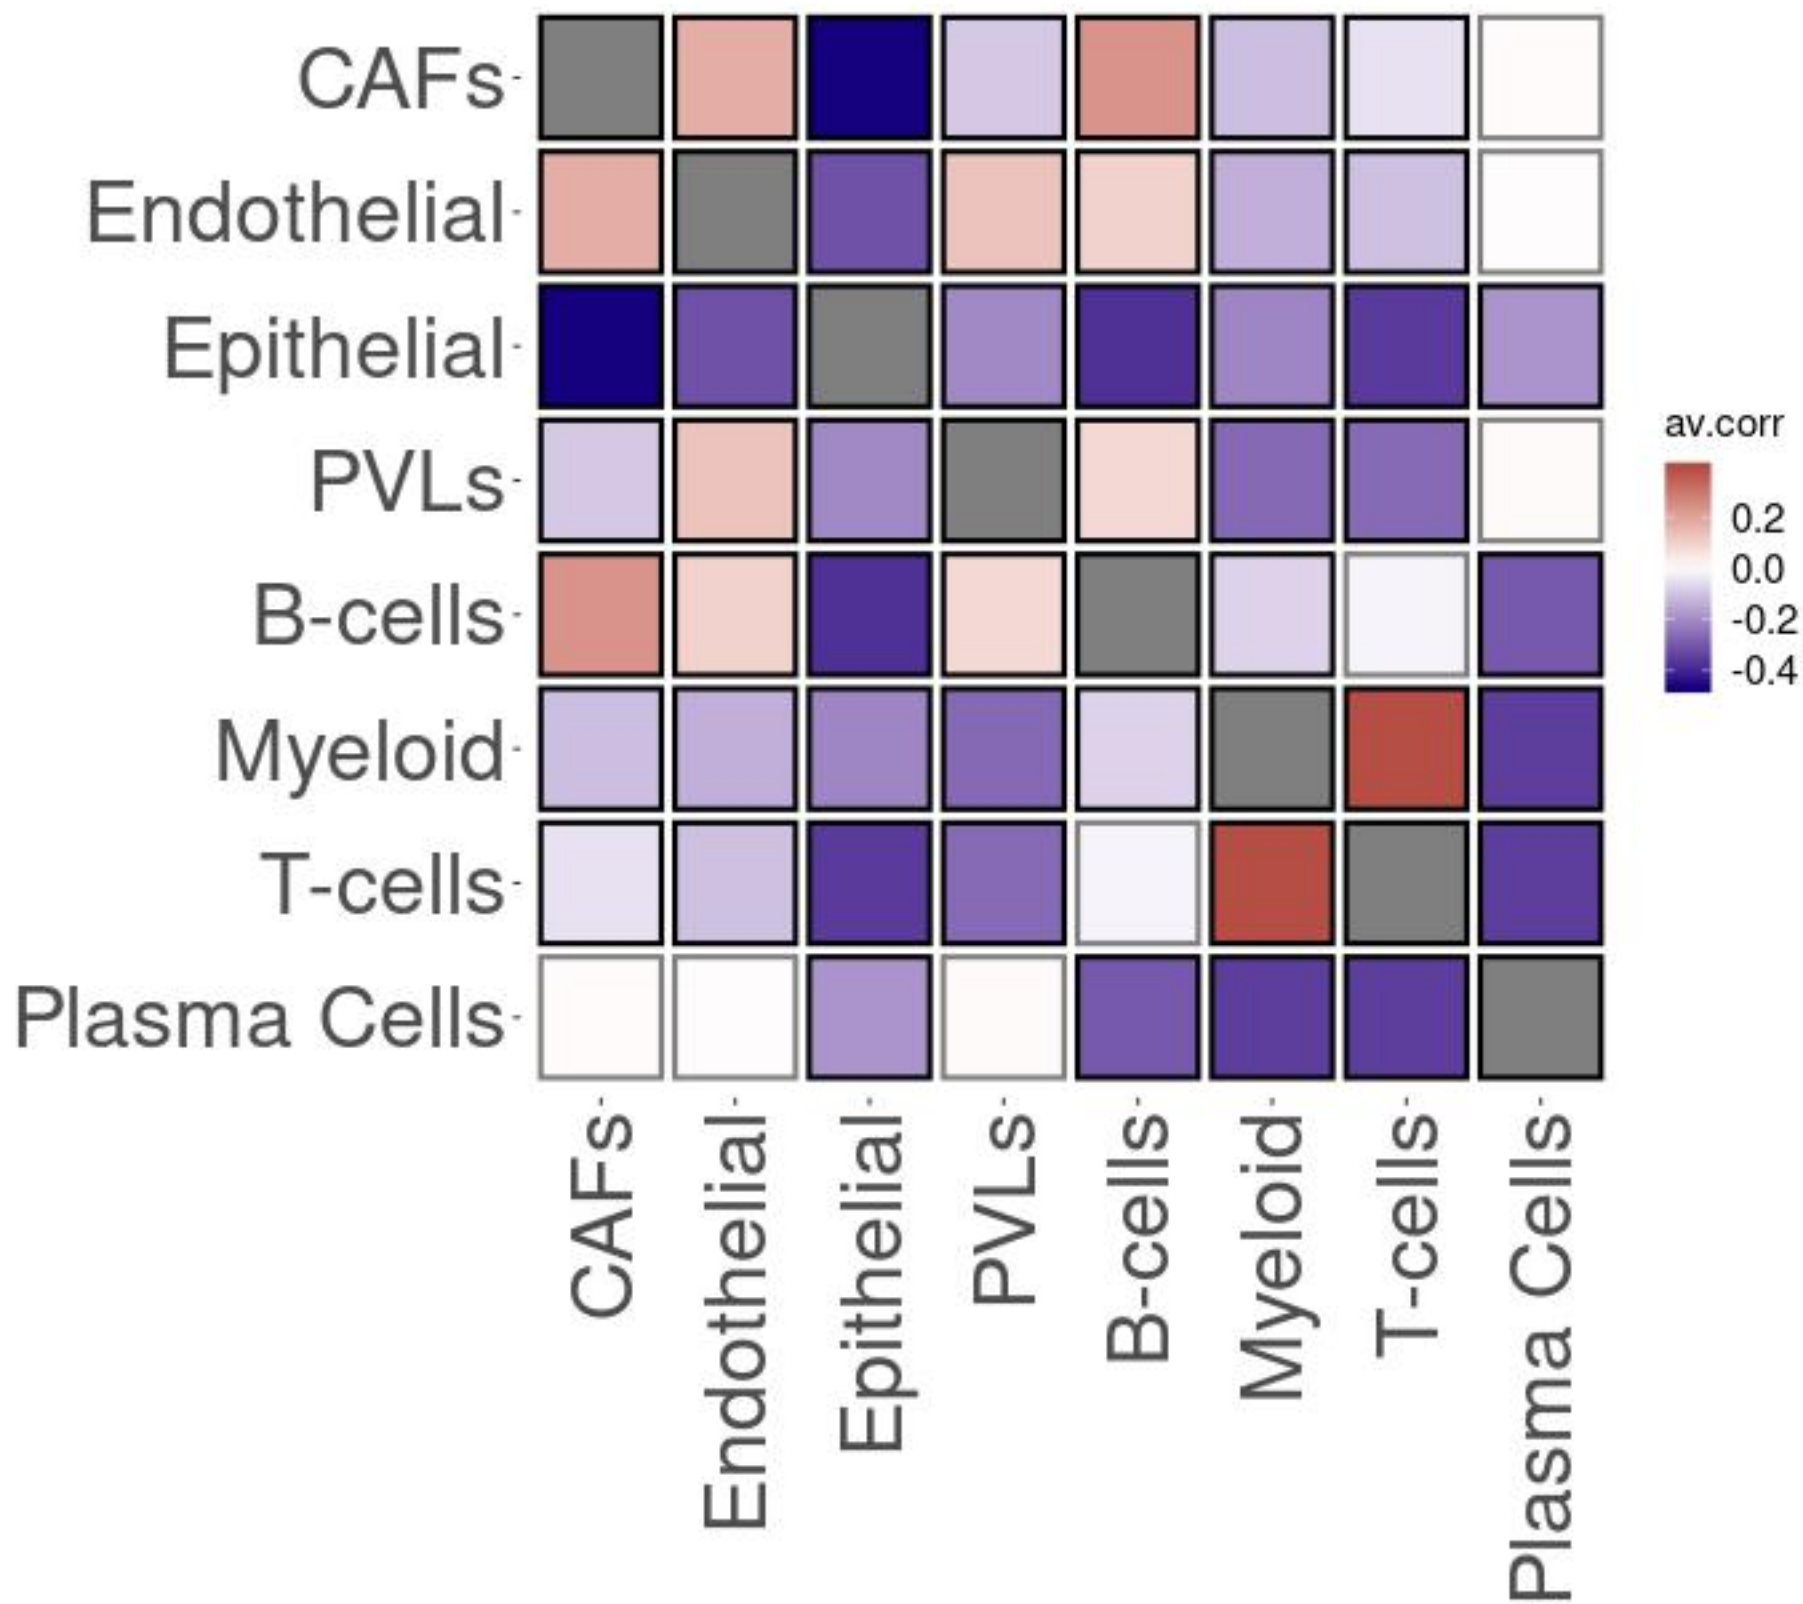

# major-A

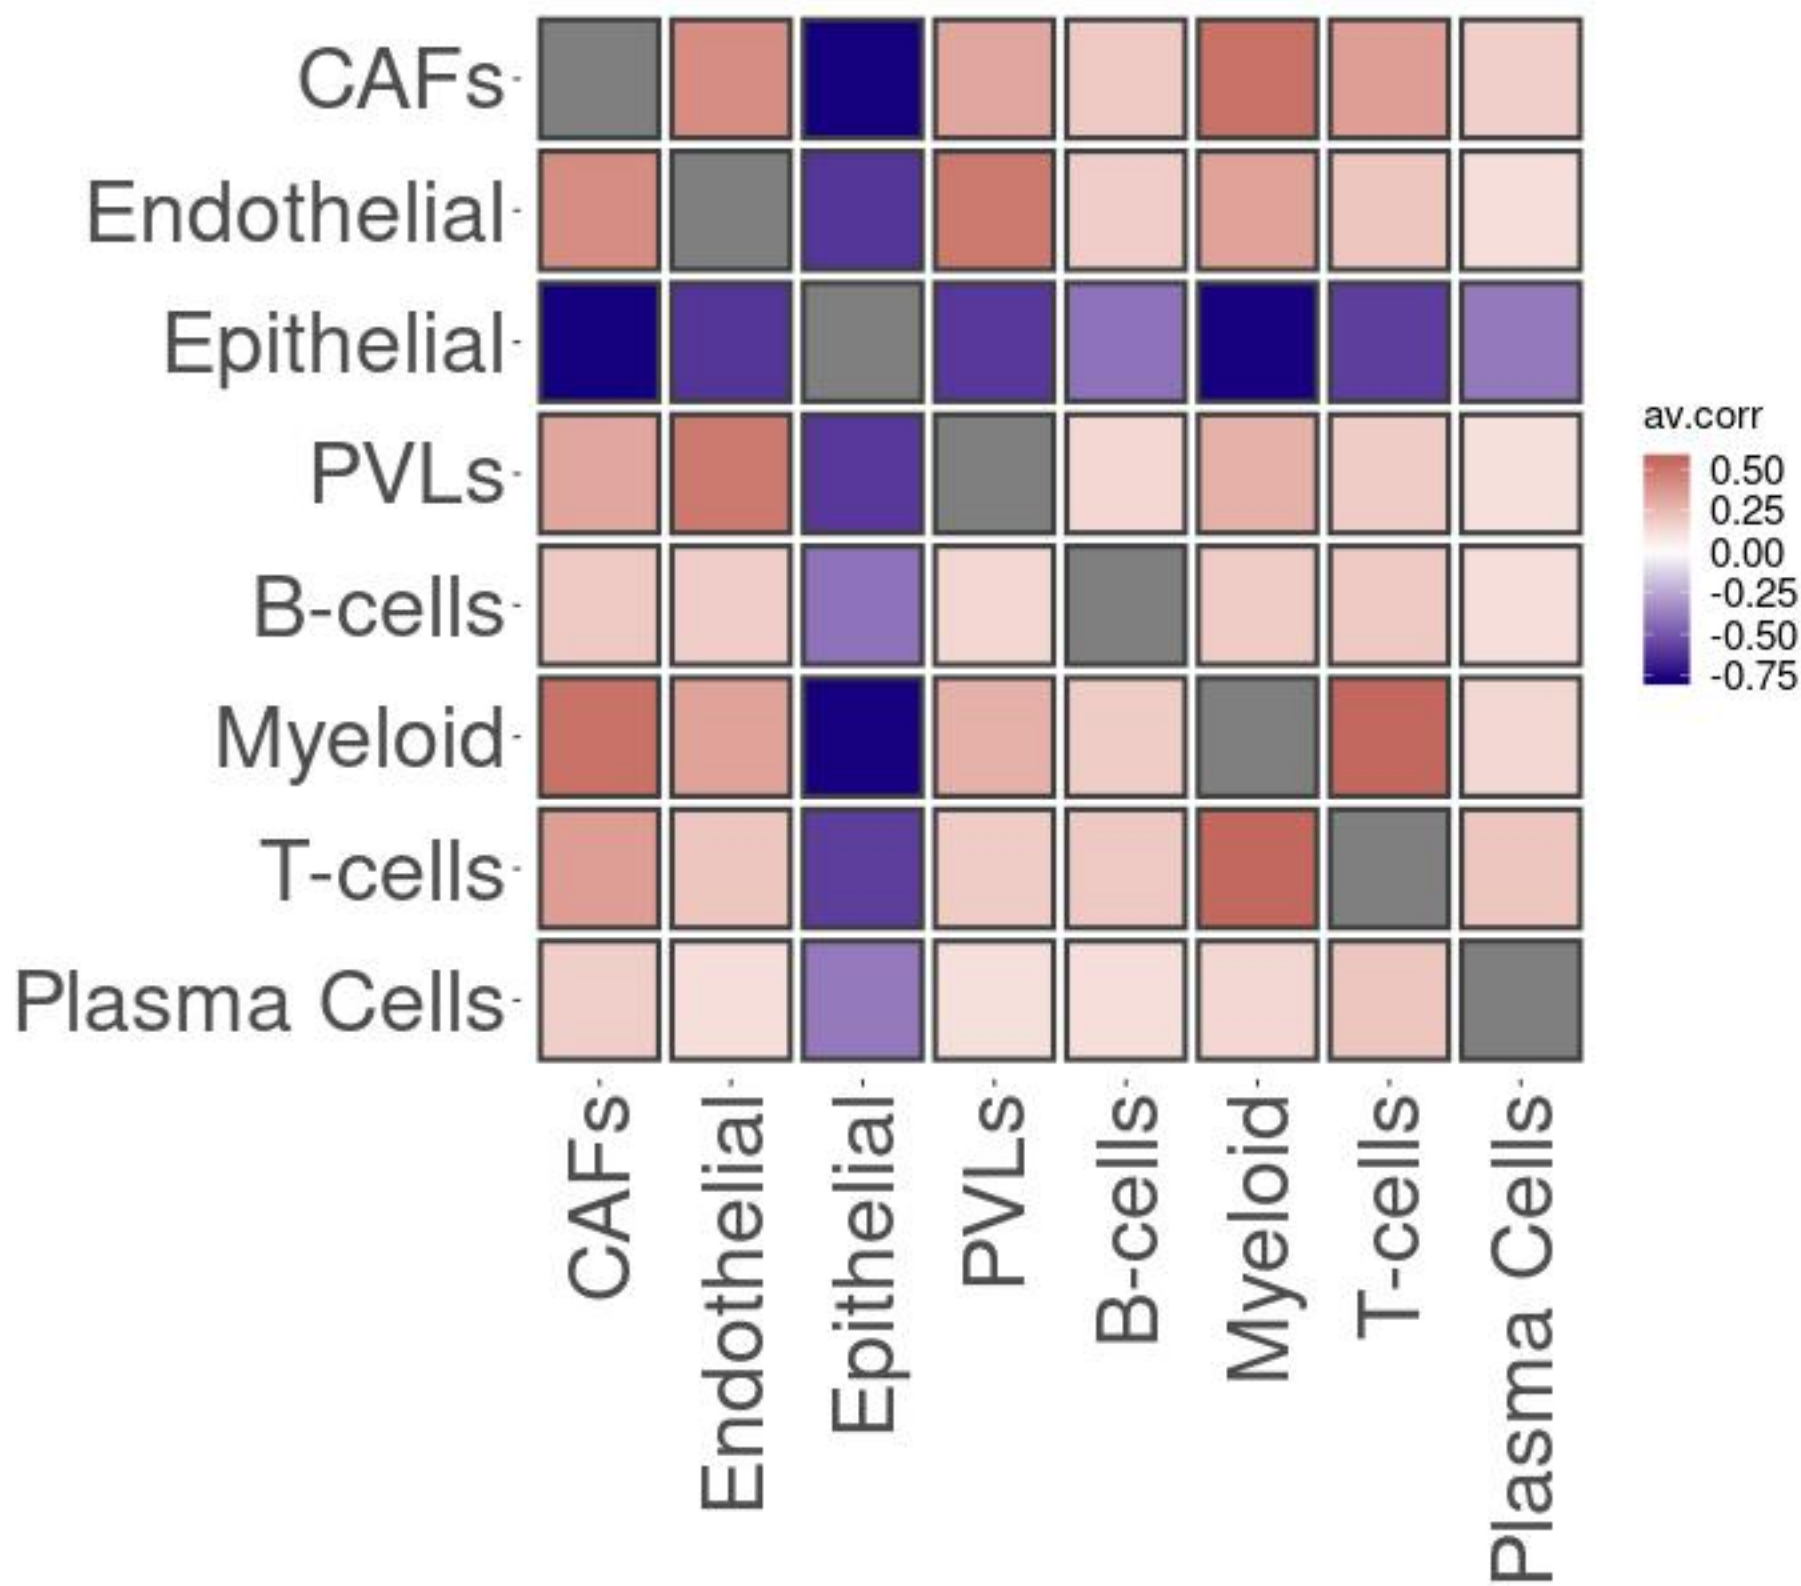

# major-D

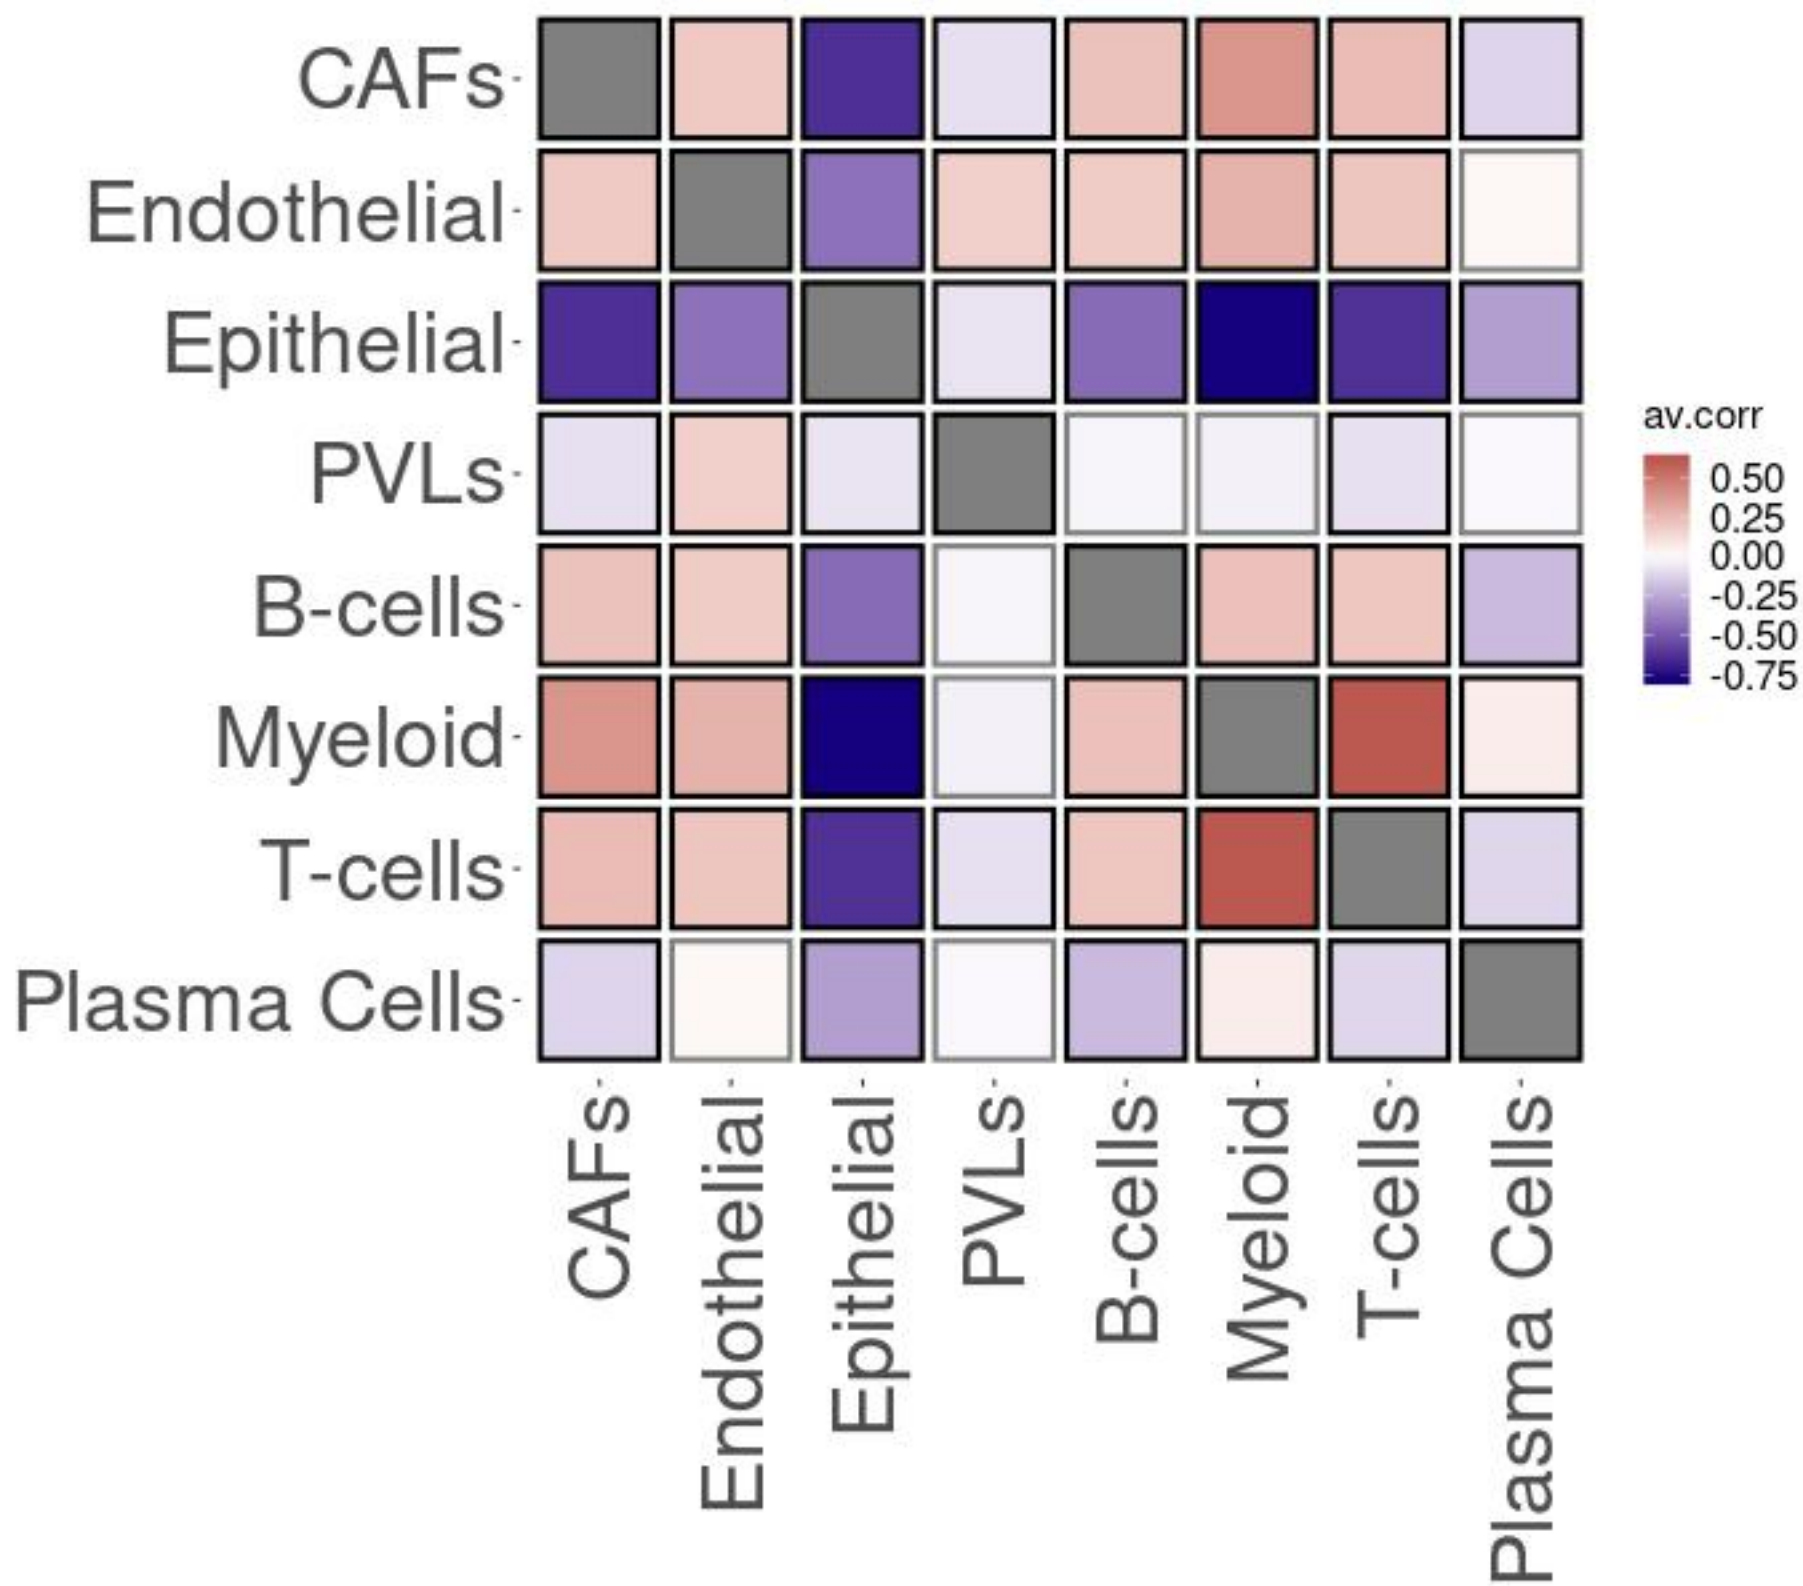

# major-all

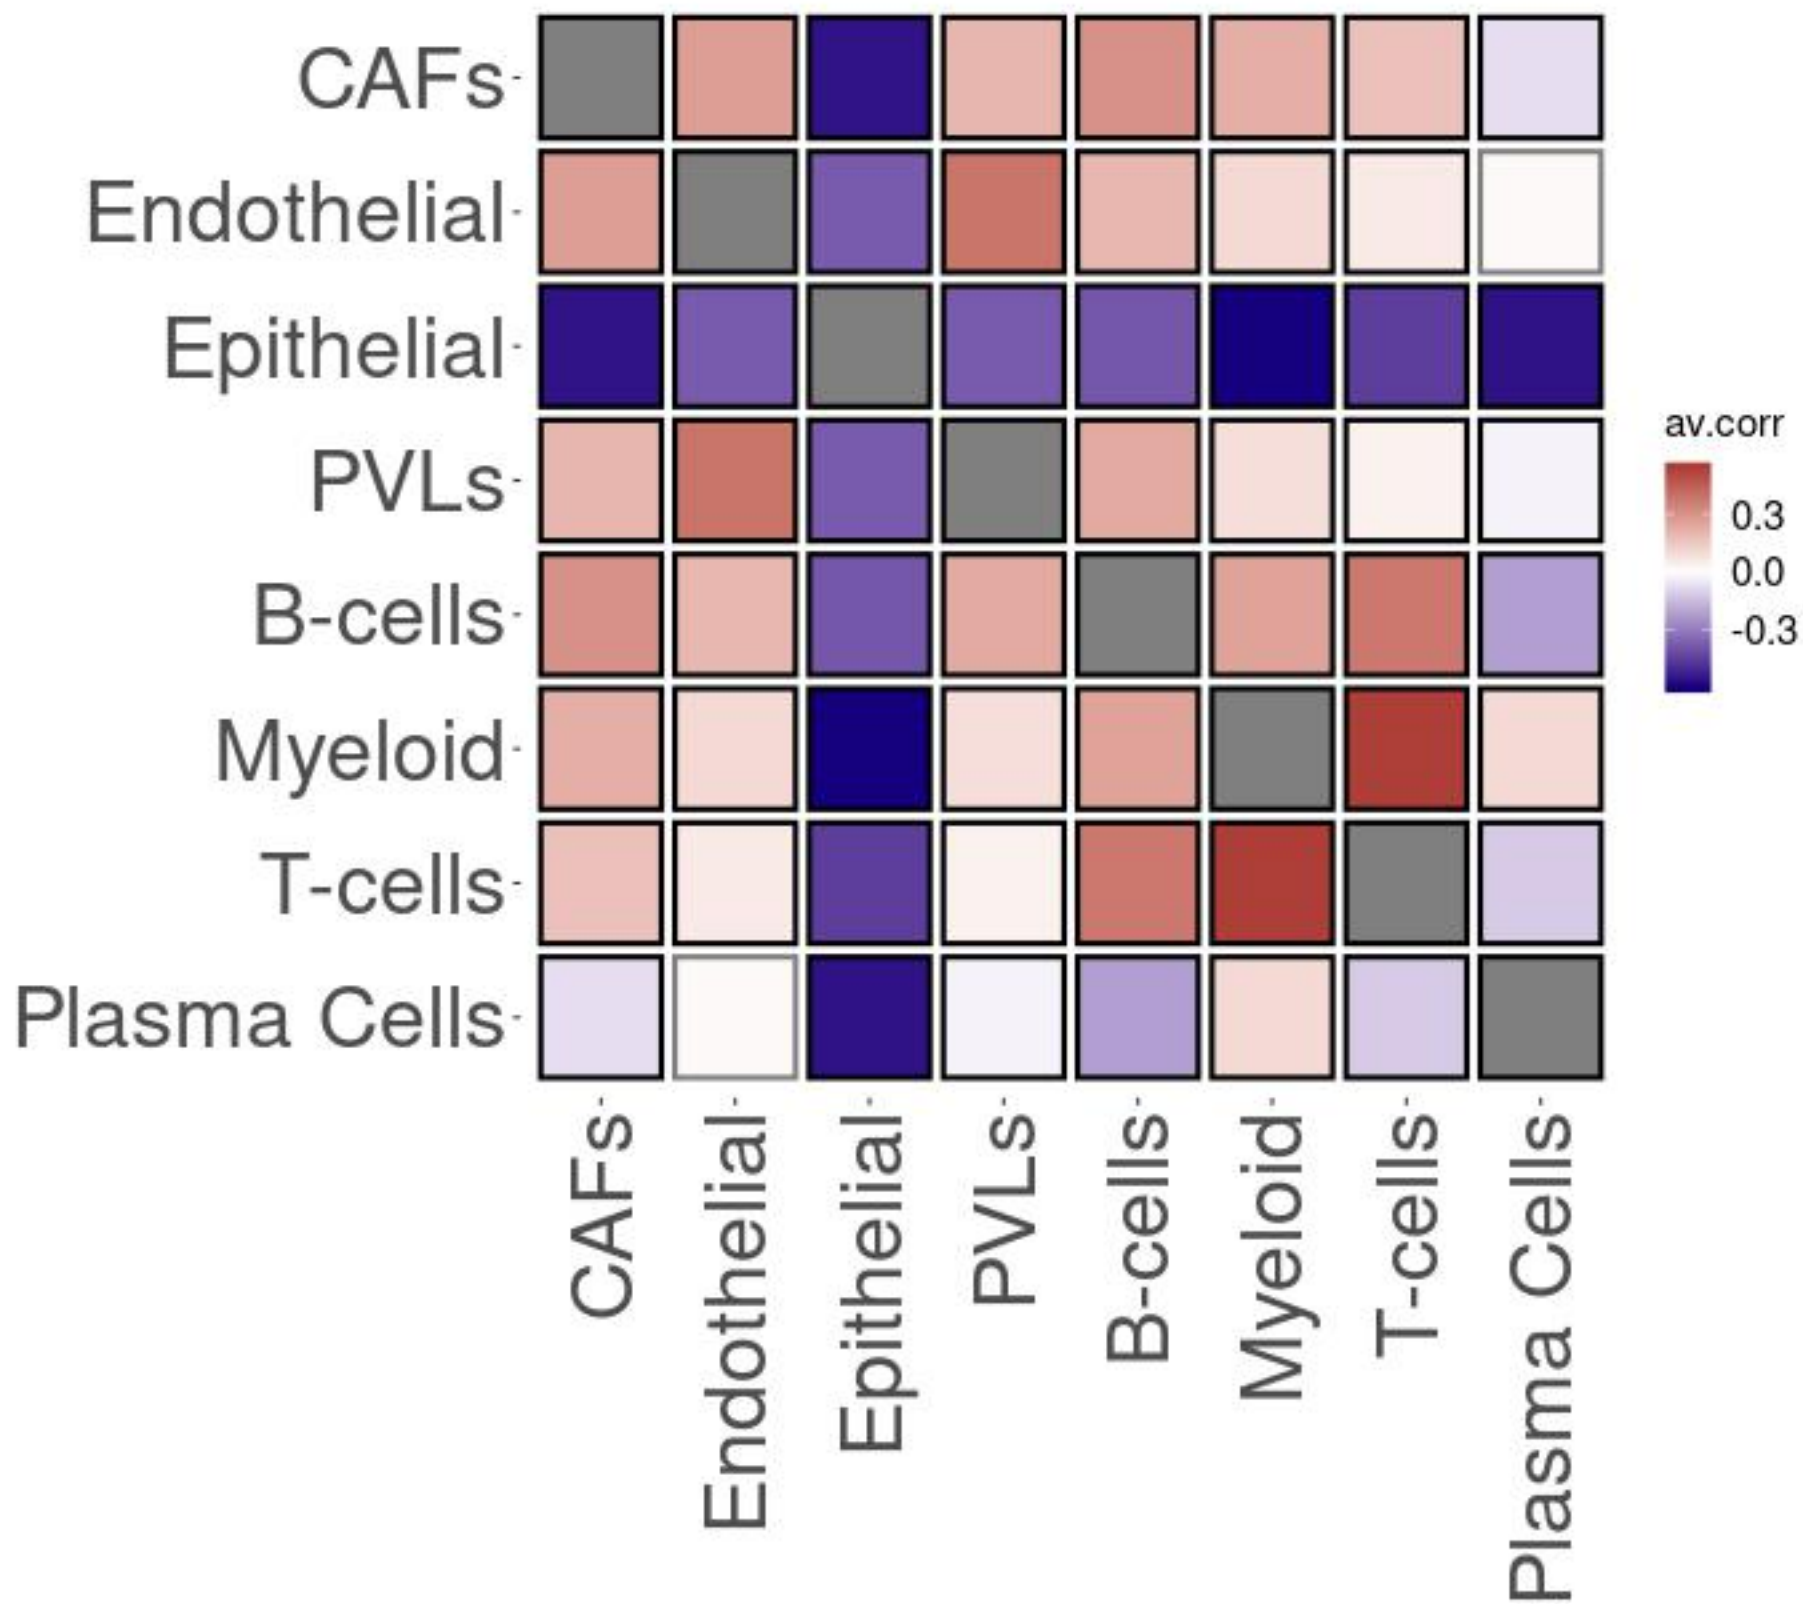



# major-F

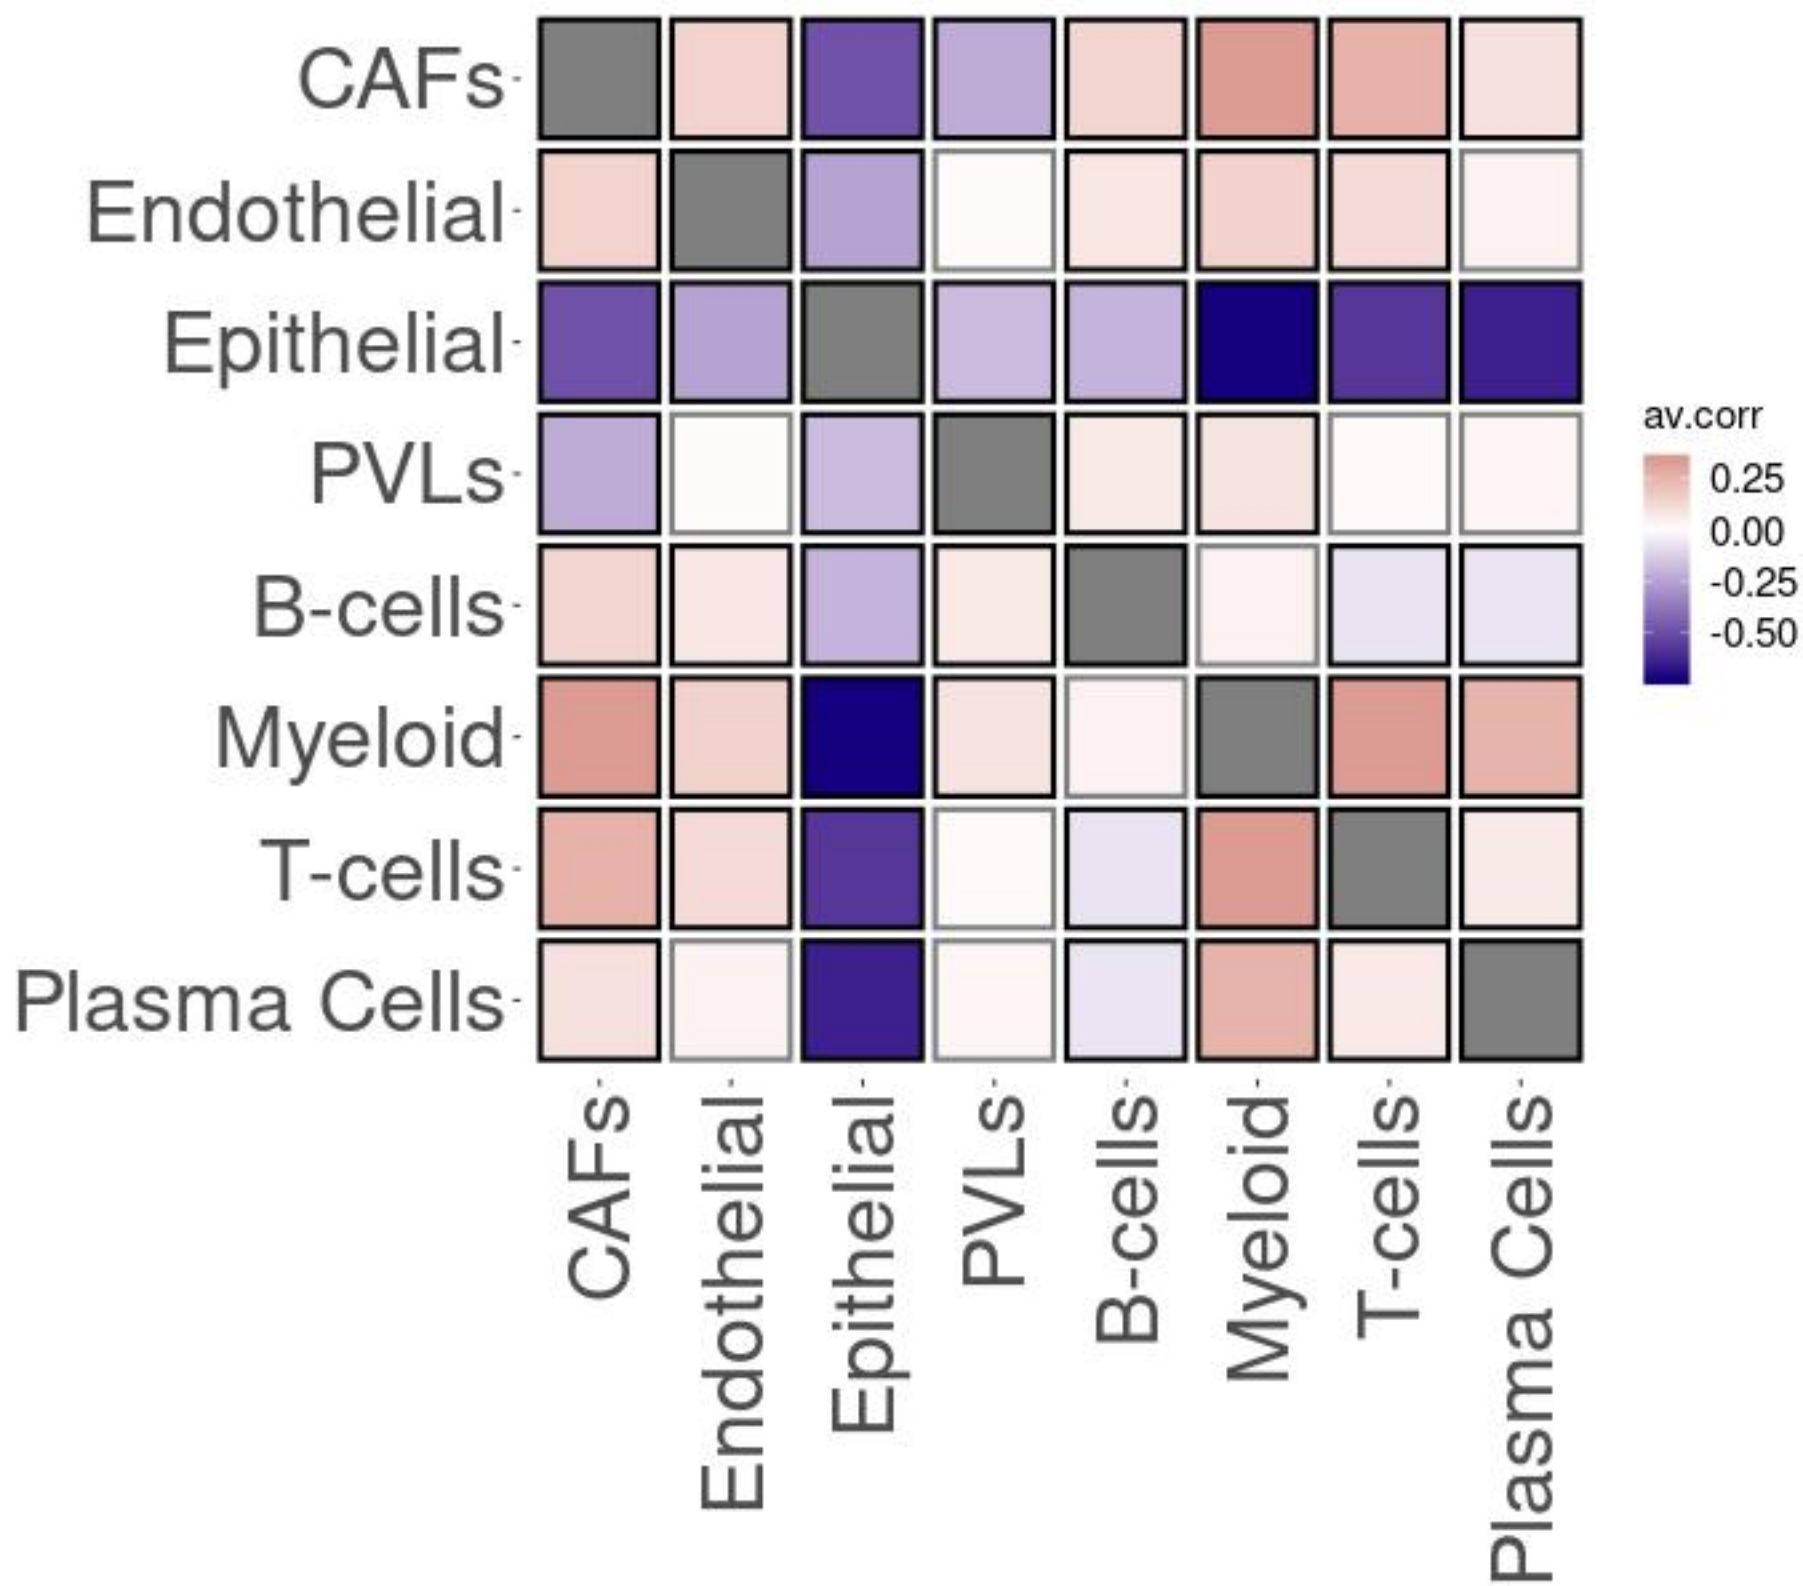



# minor-B

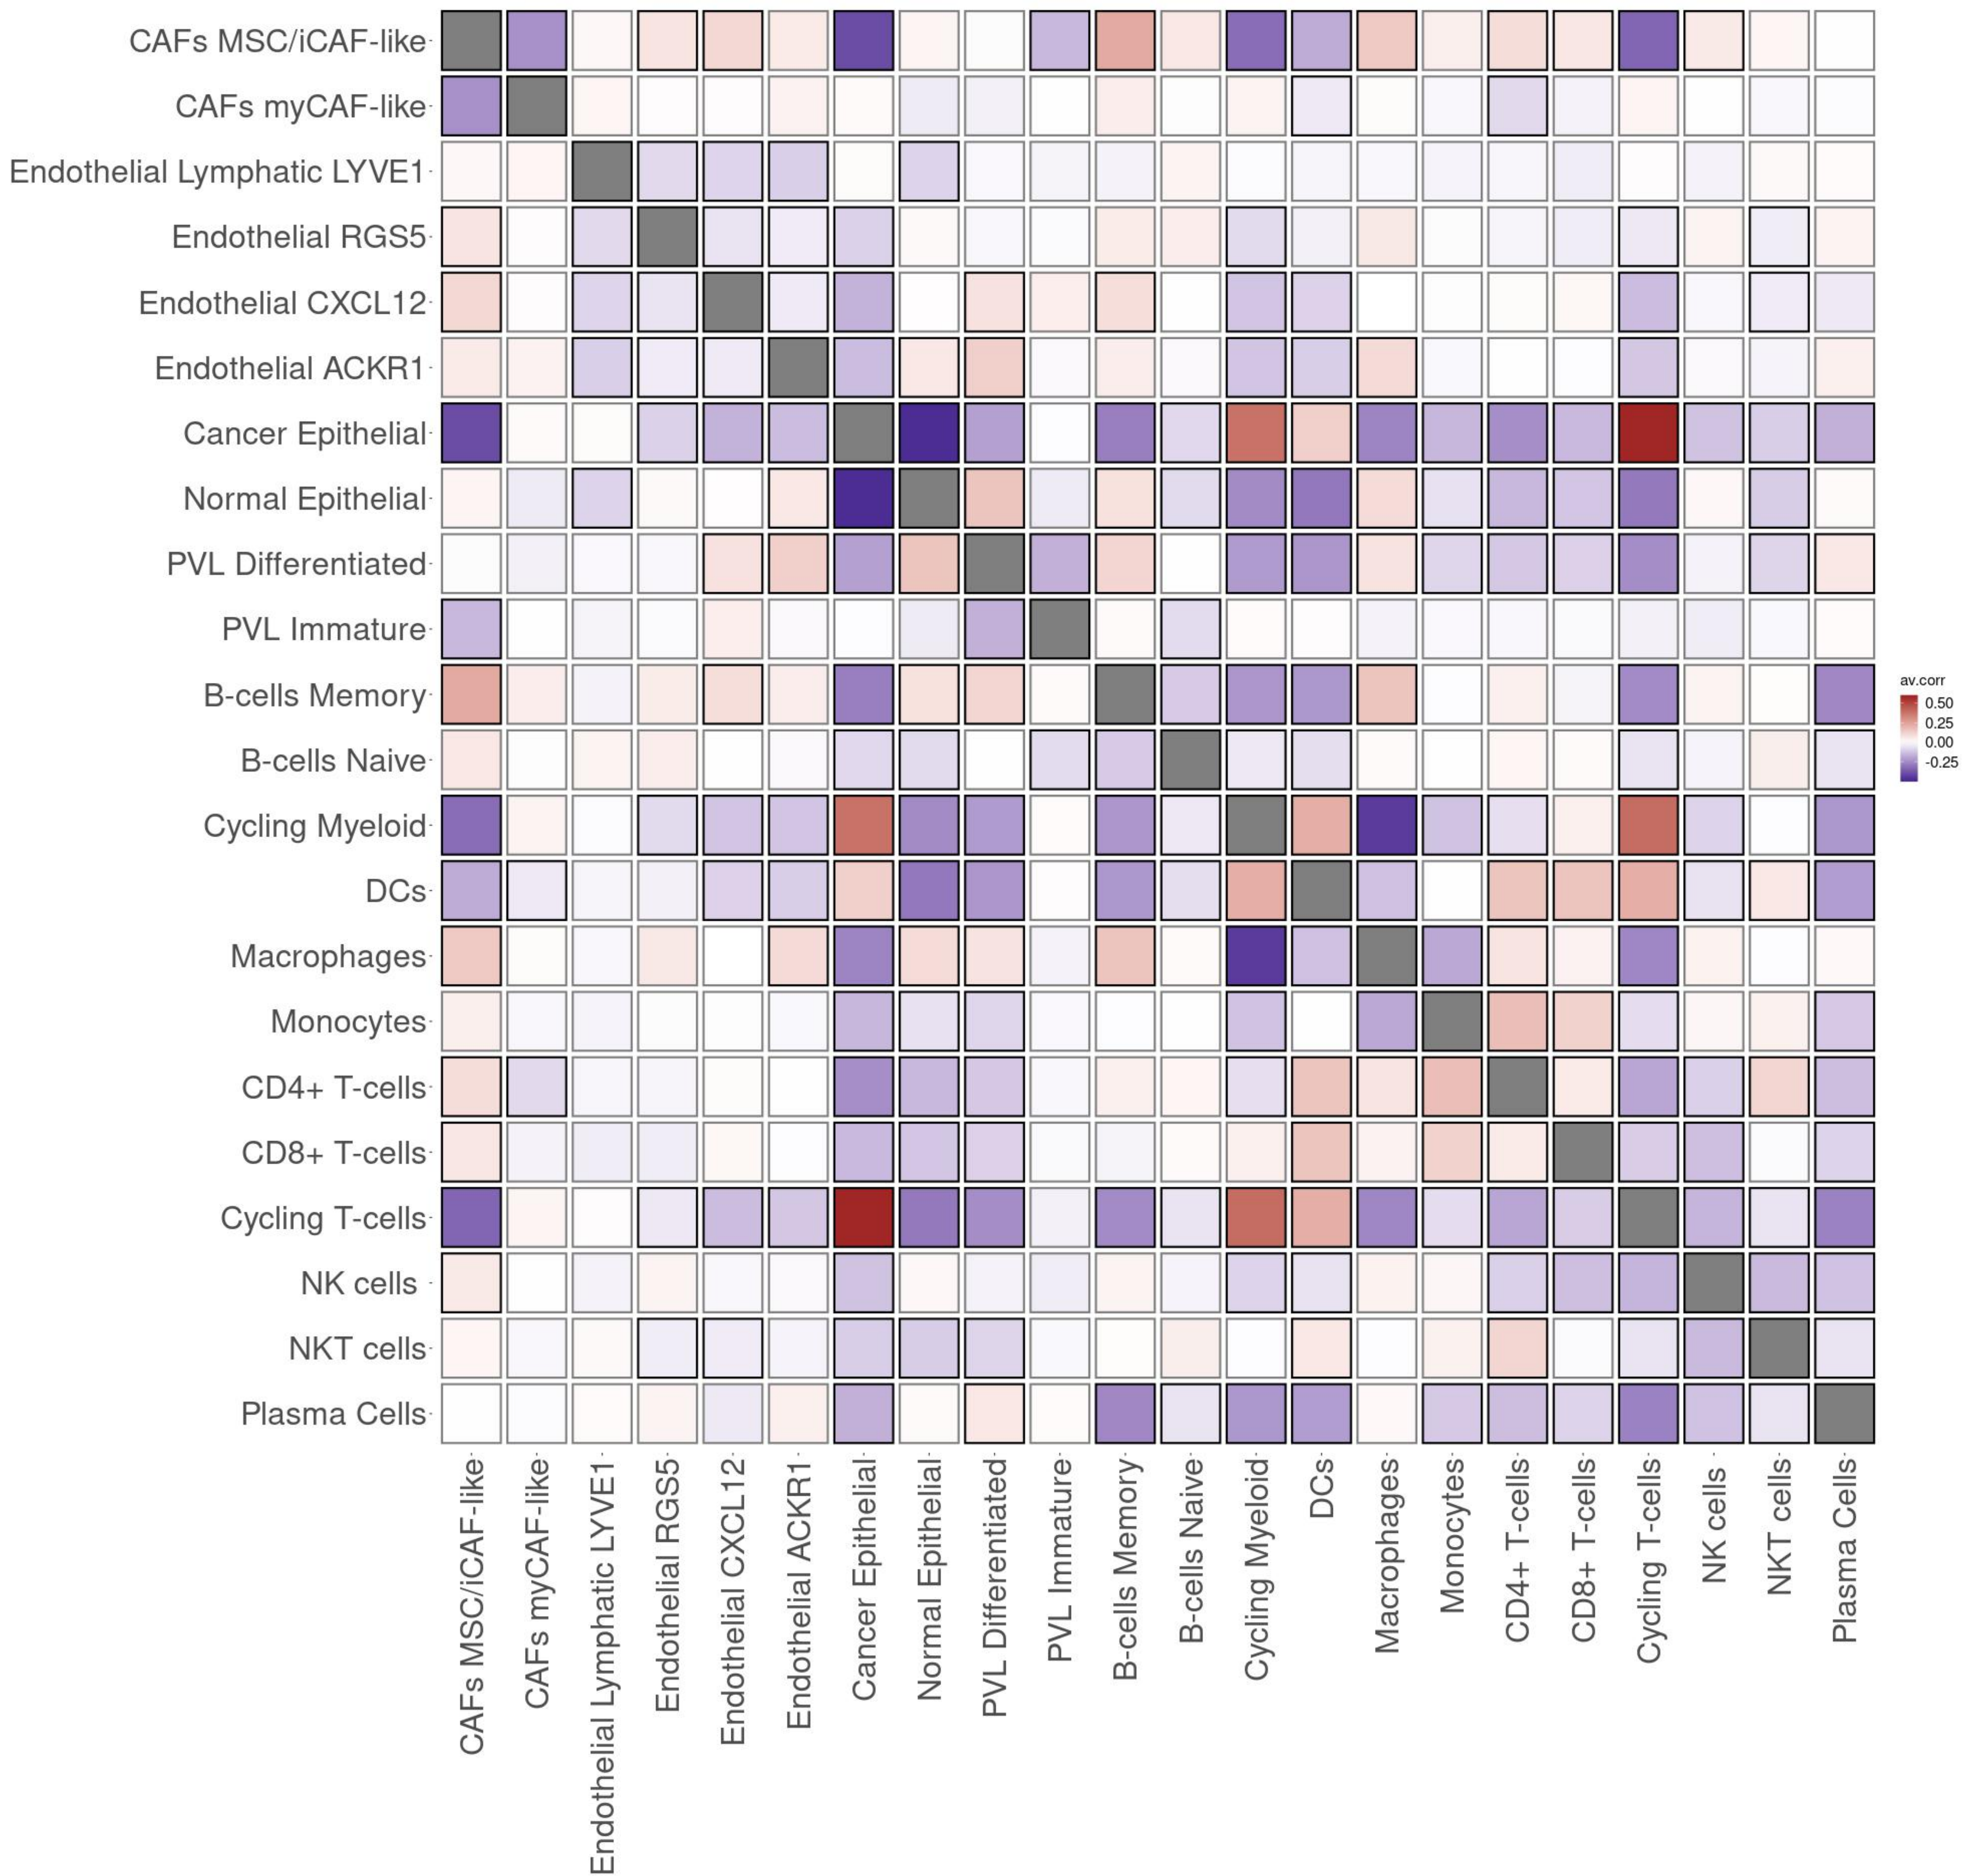





# minor-D

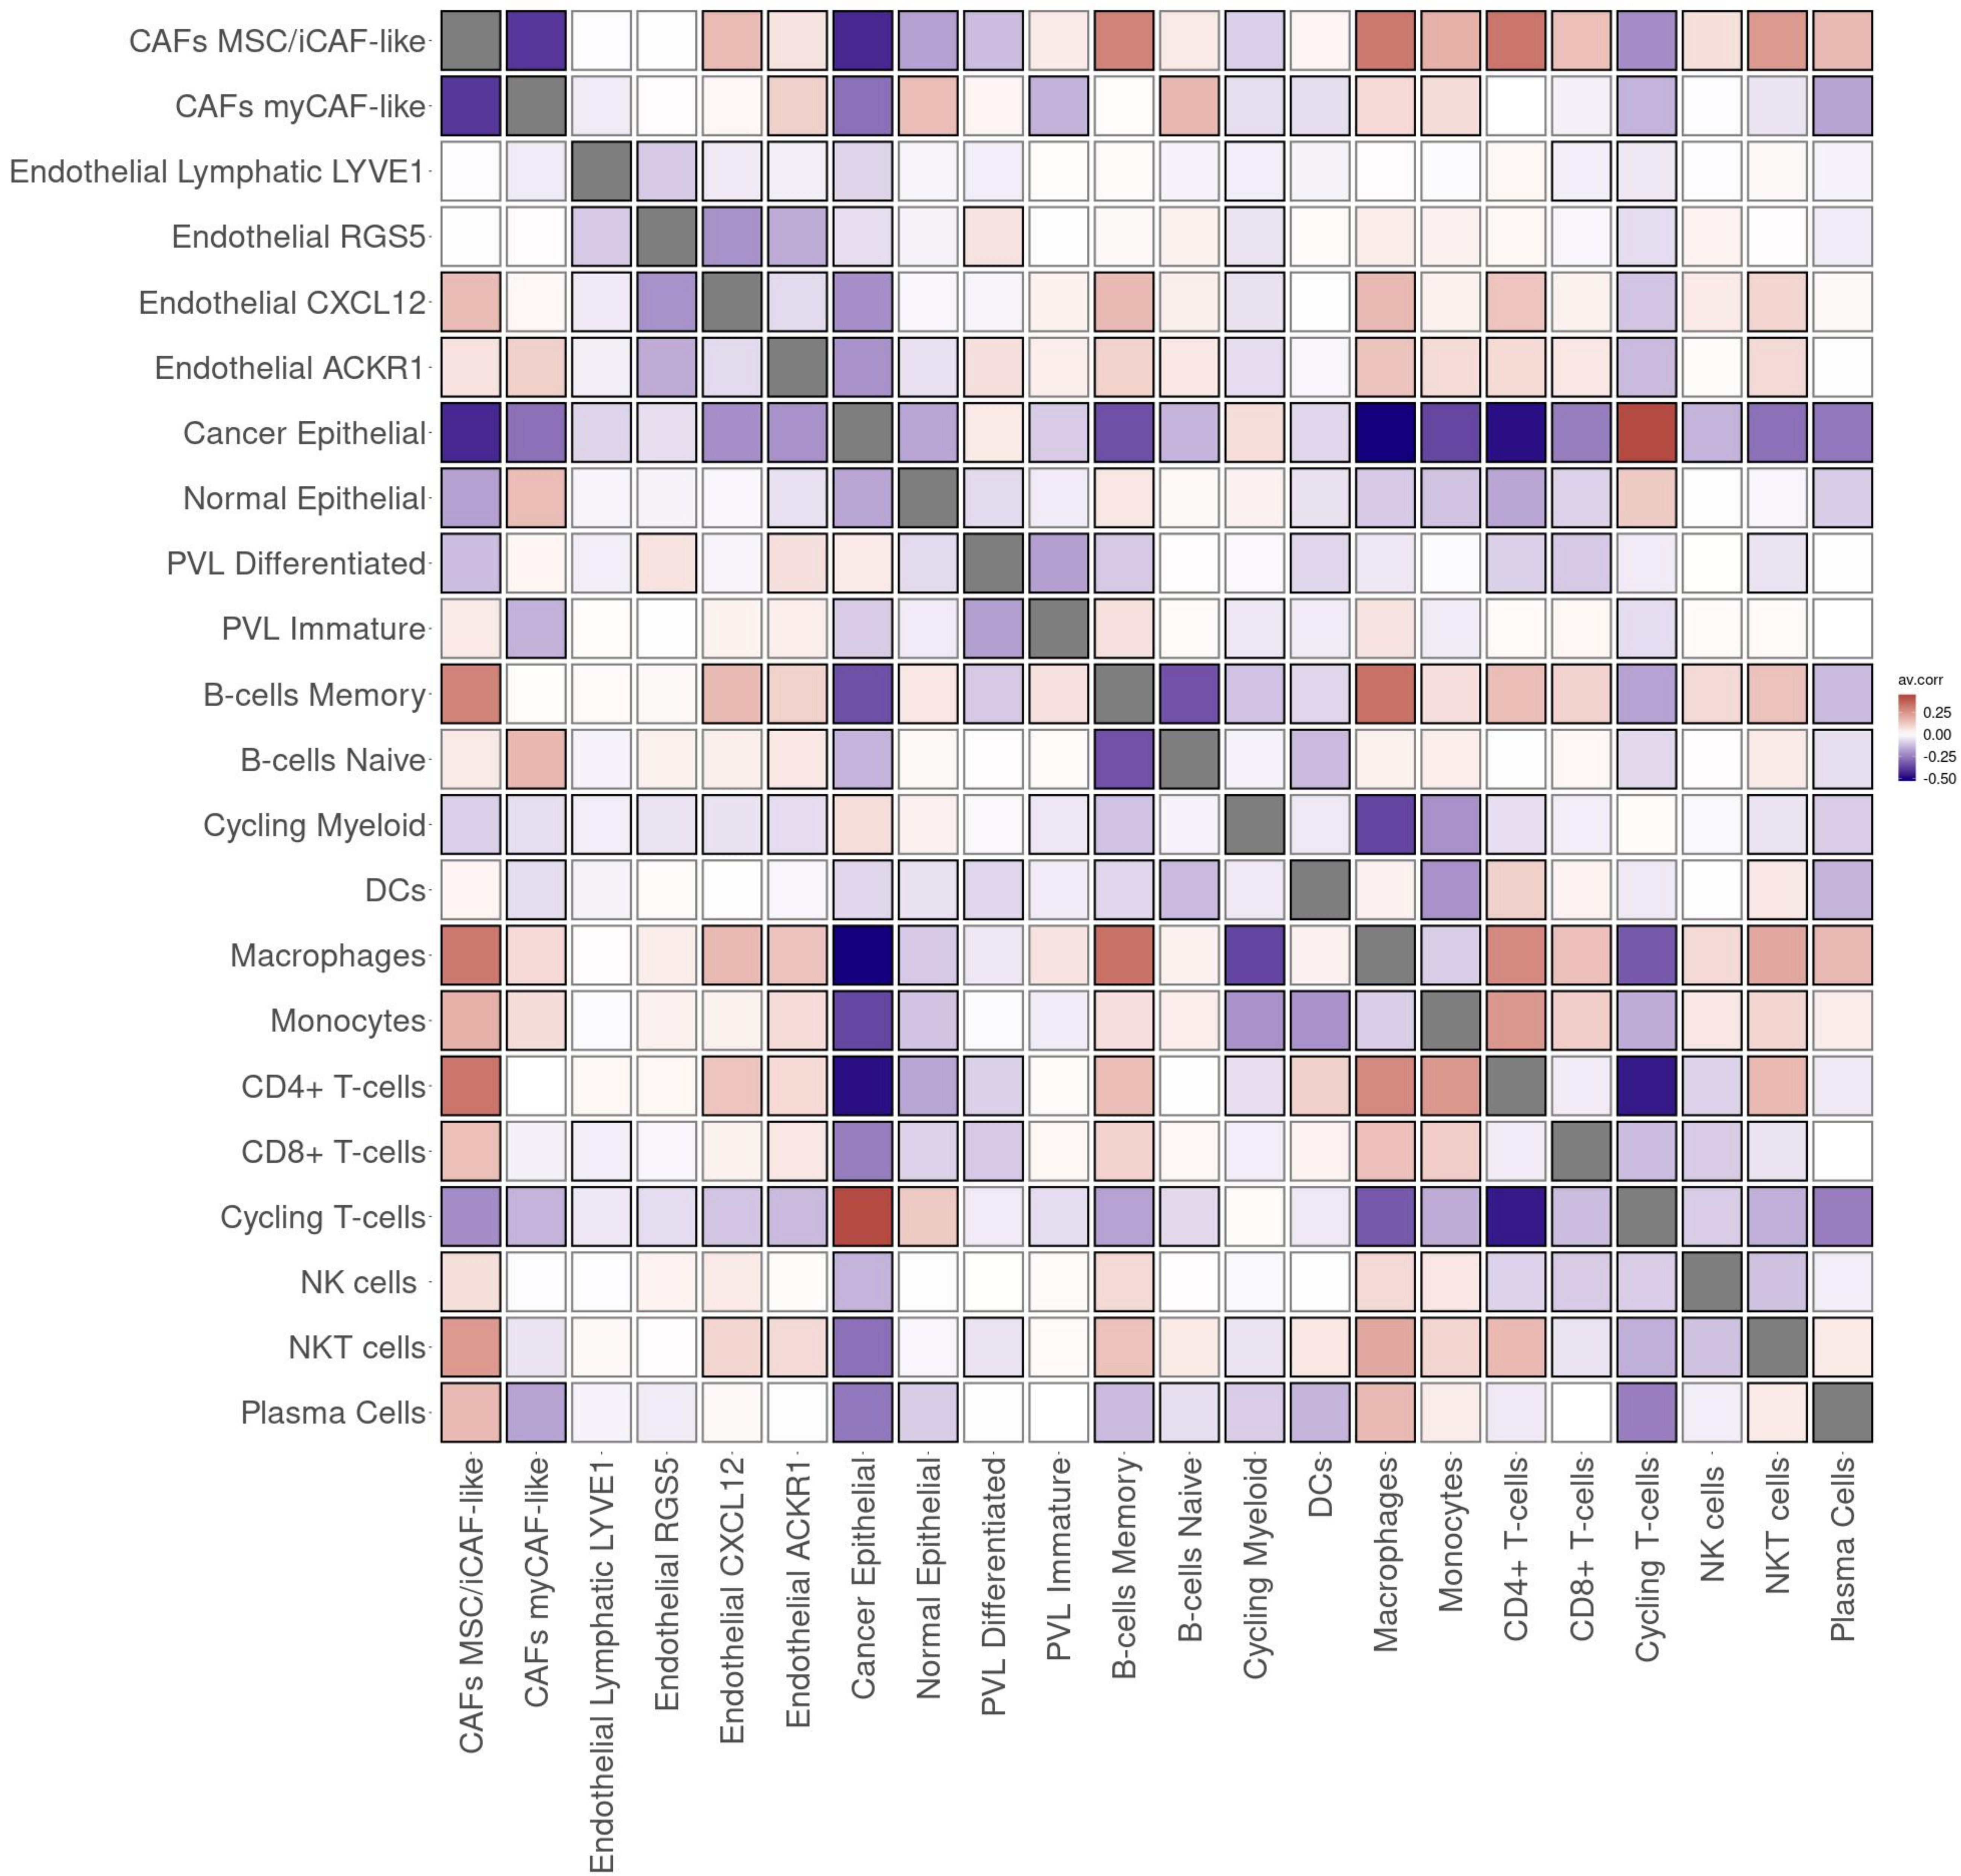

# minor-E

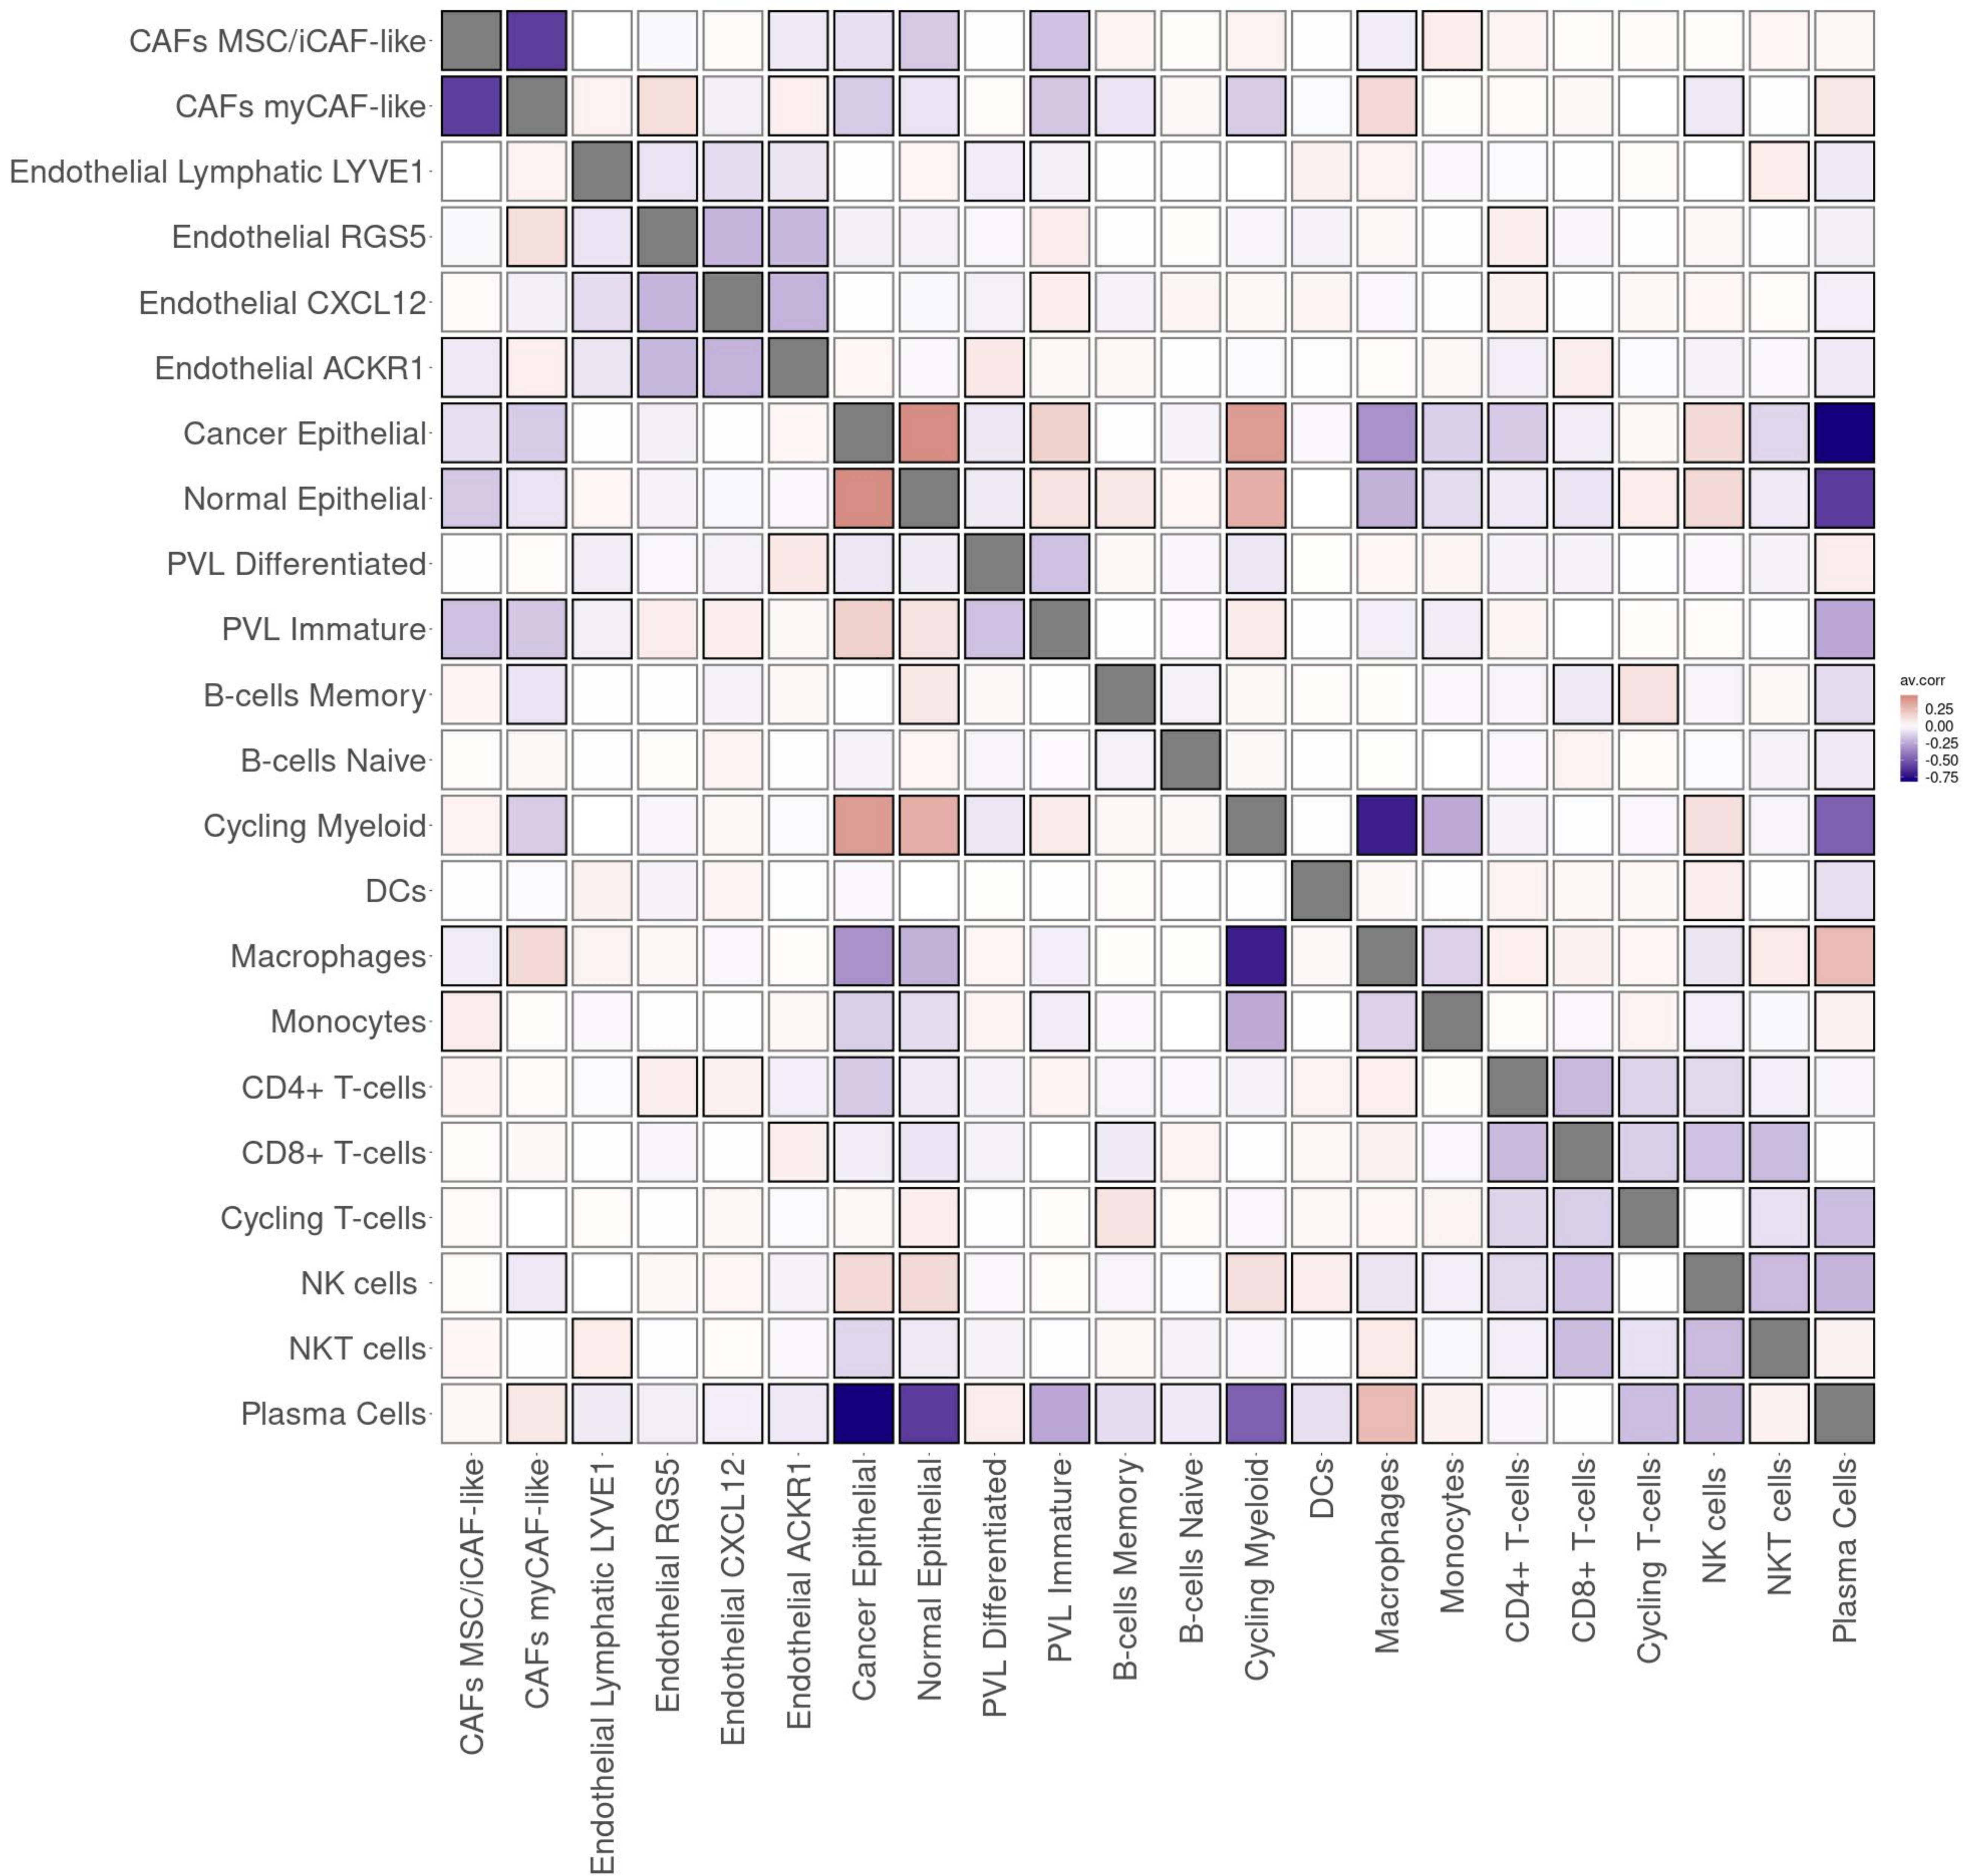

# minor-F

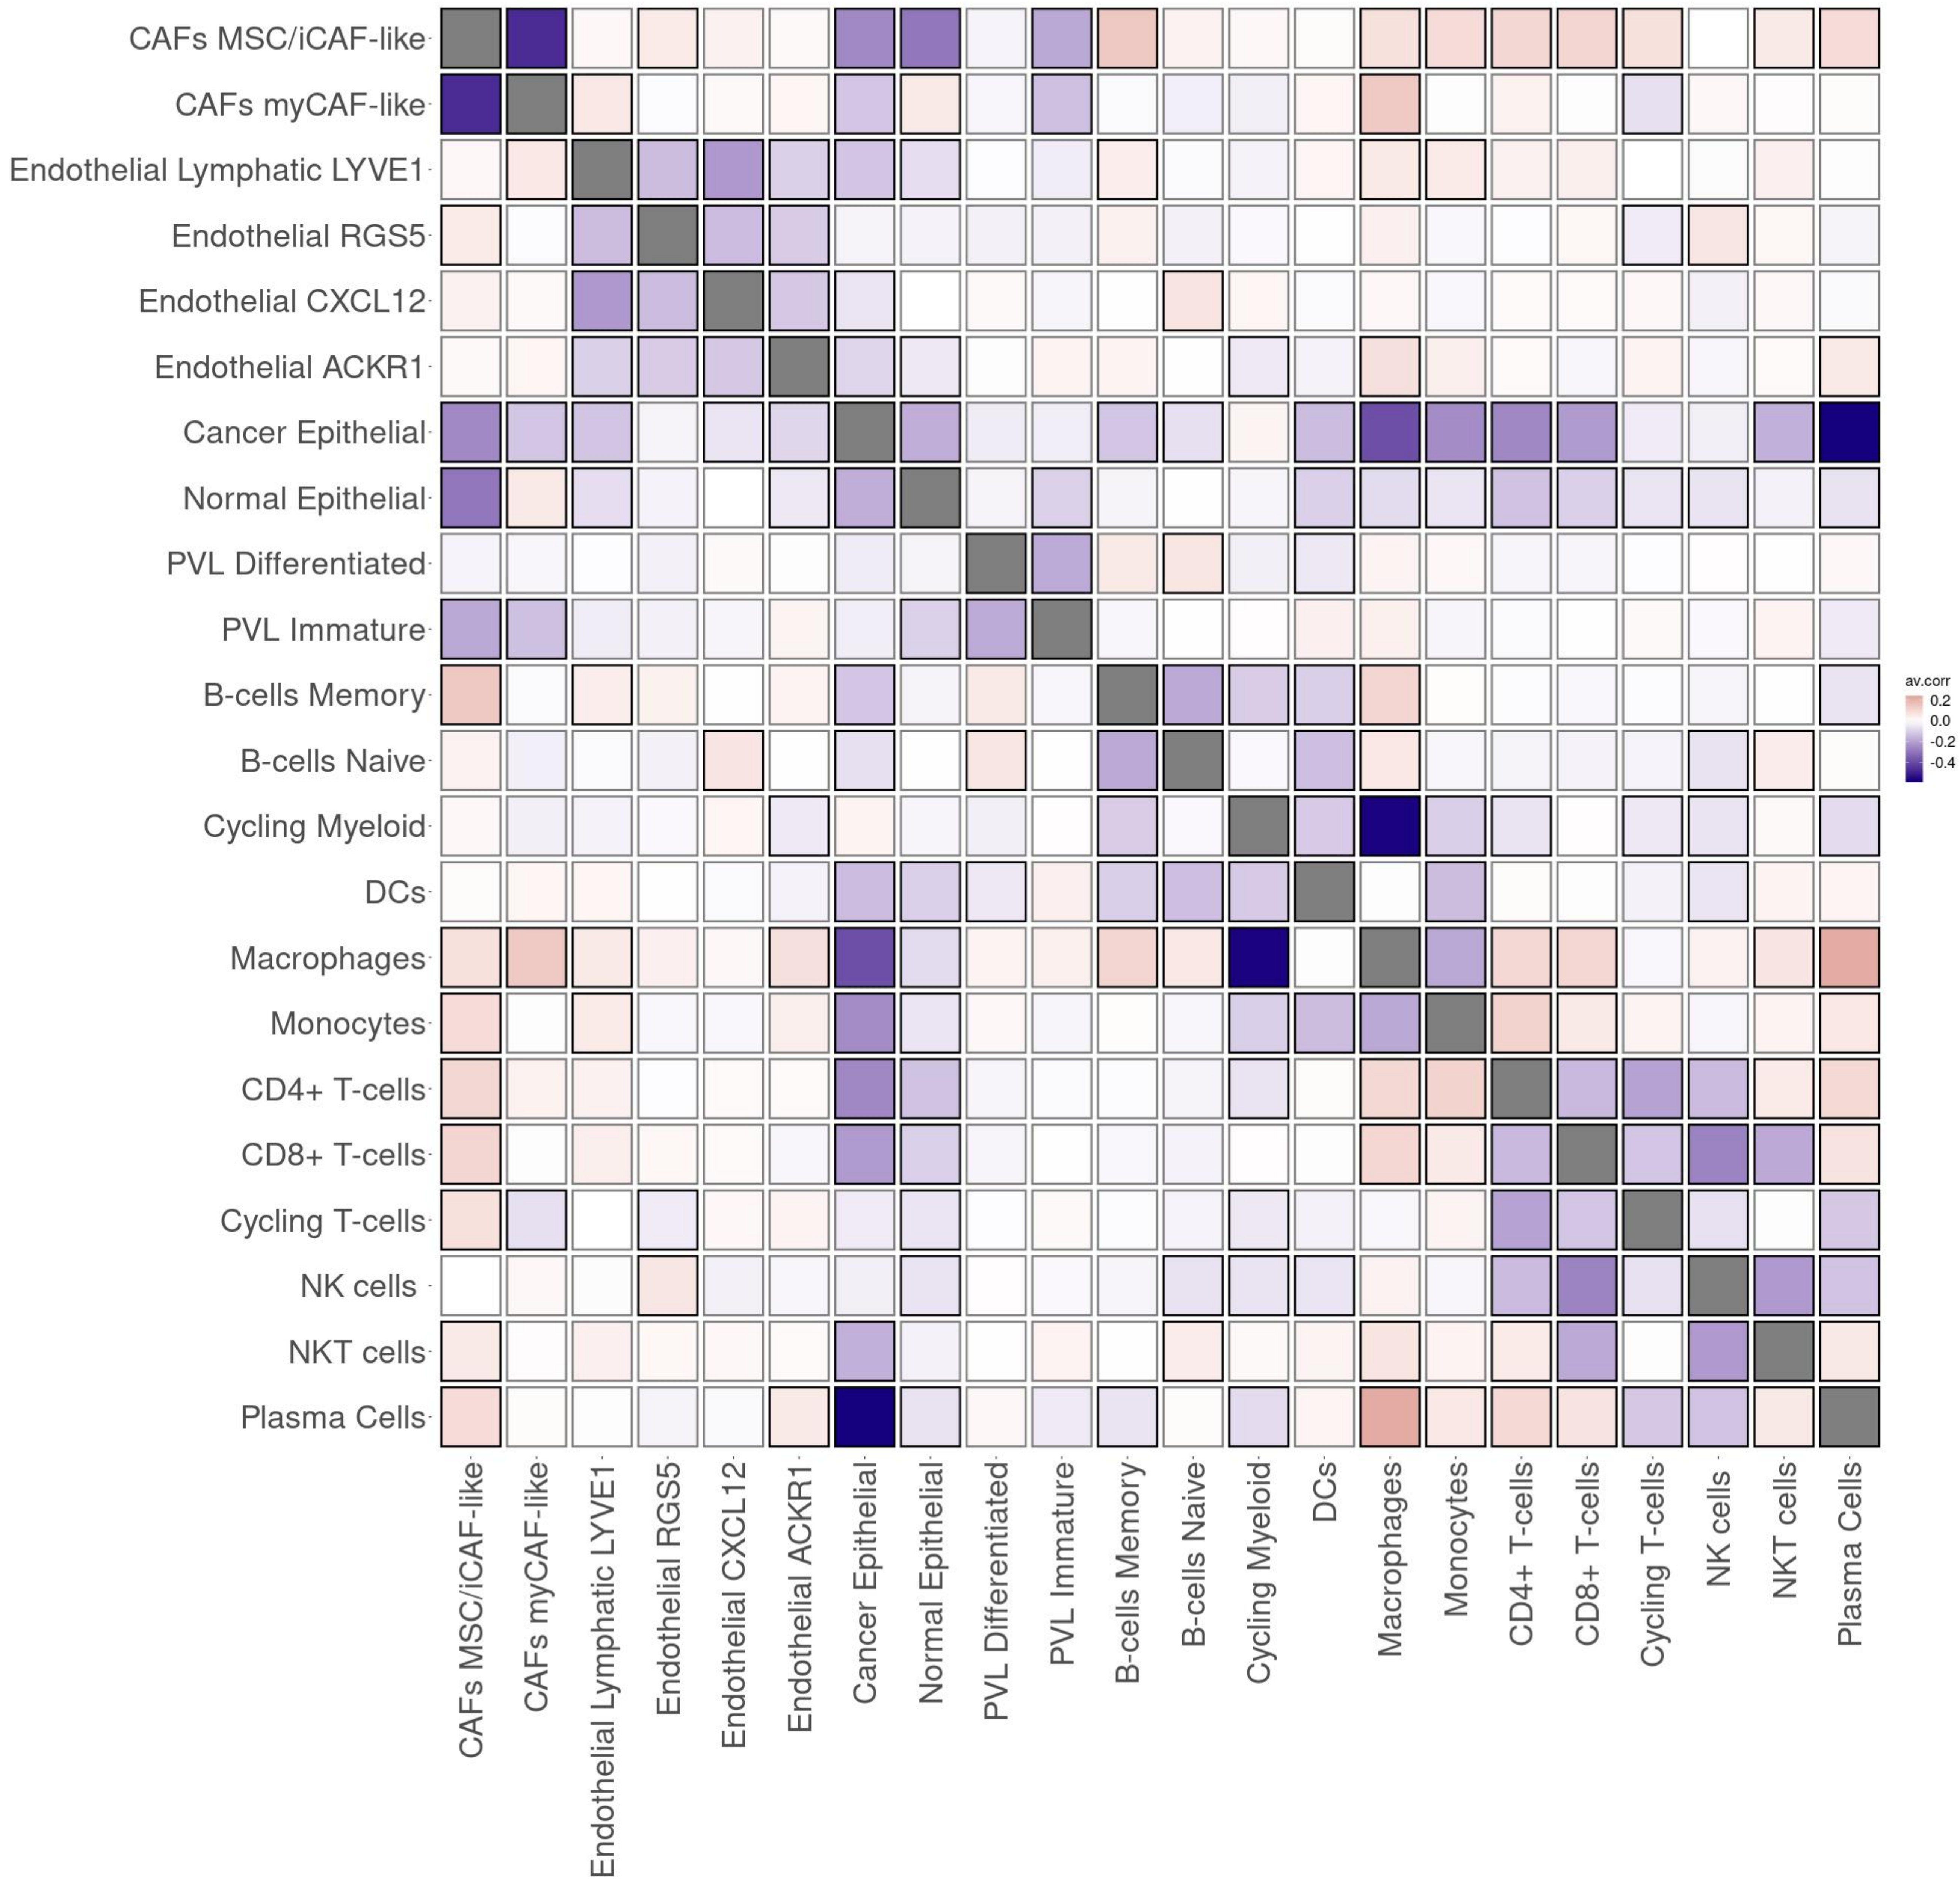







# minor-C

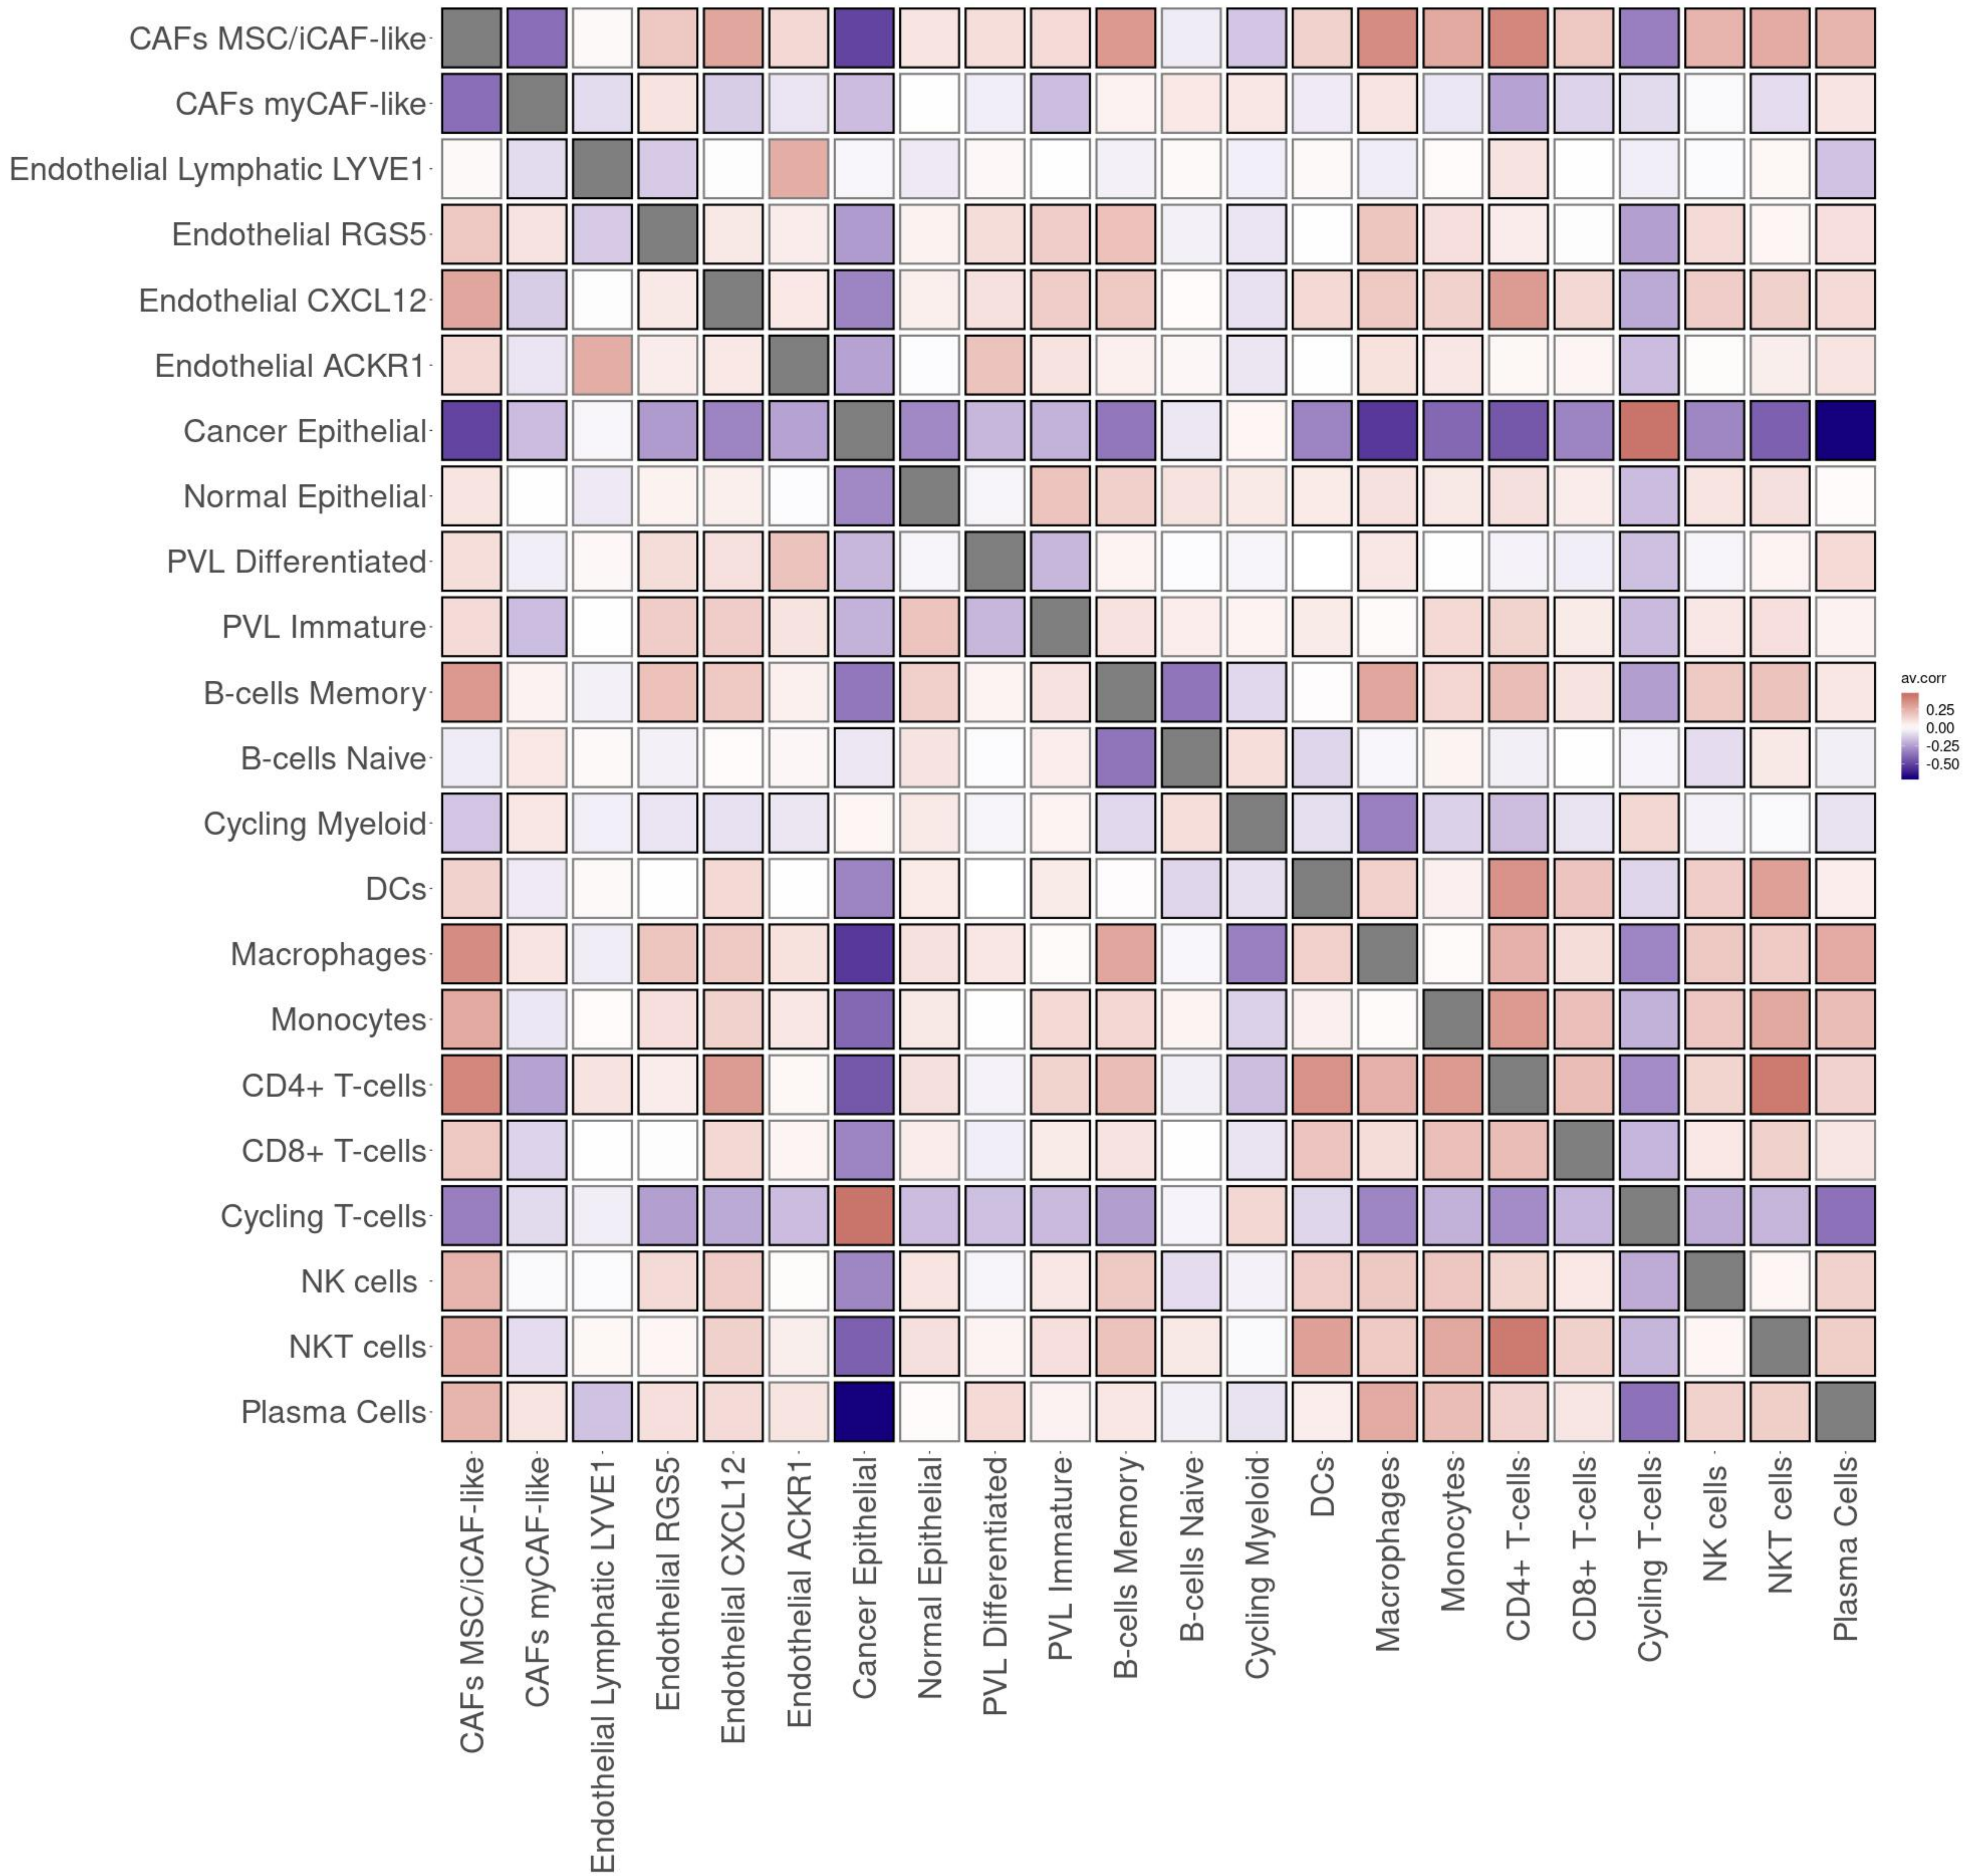

# subset-A

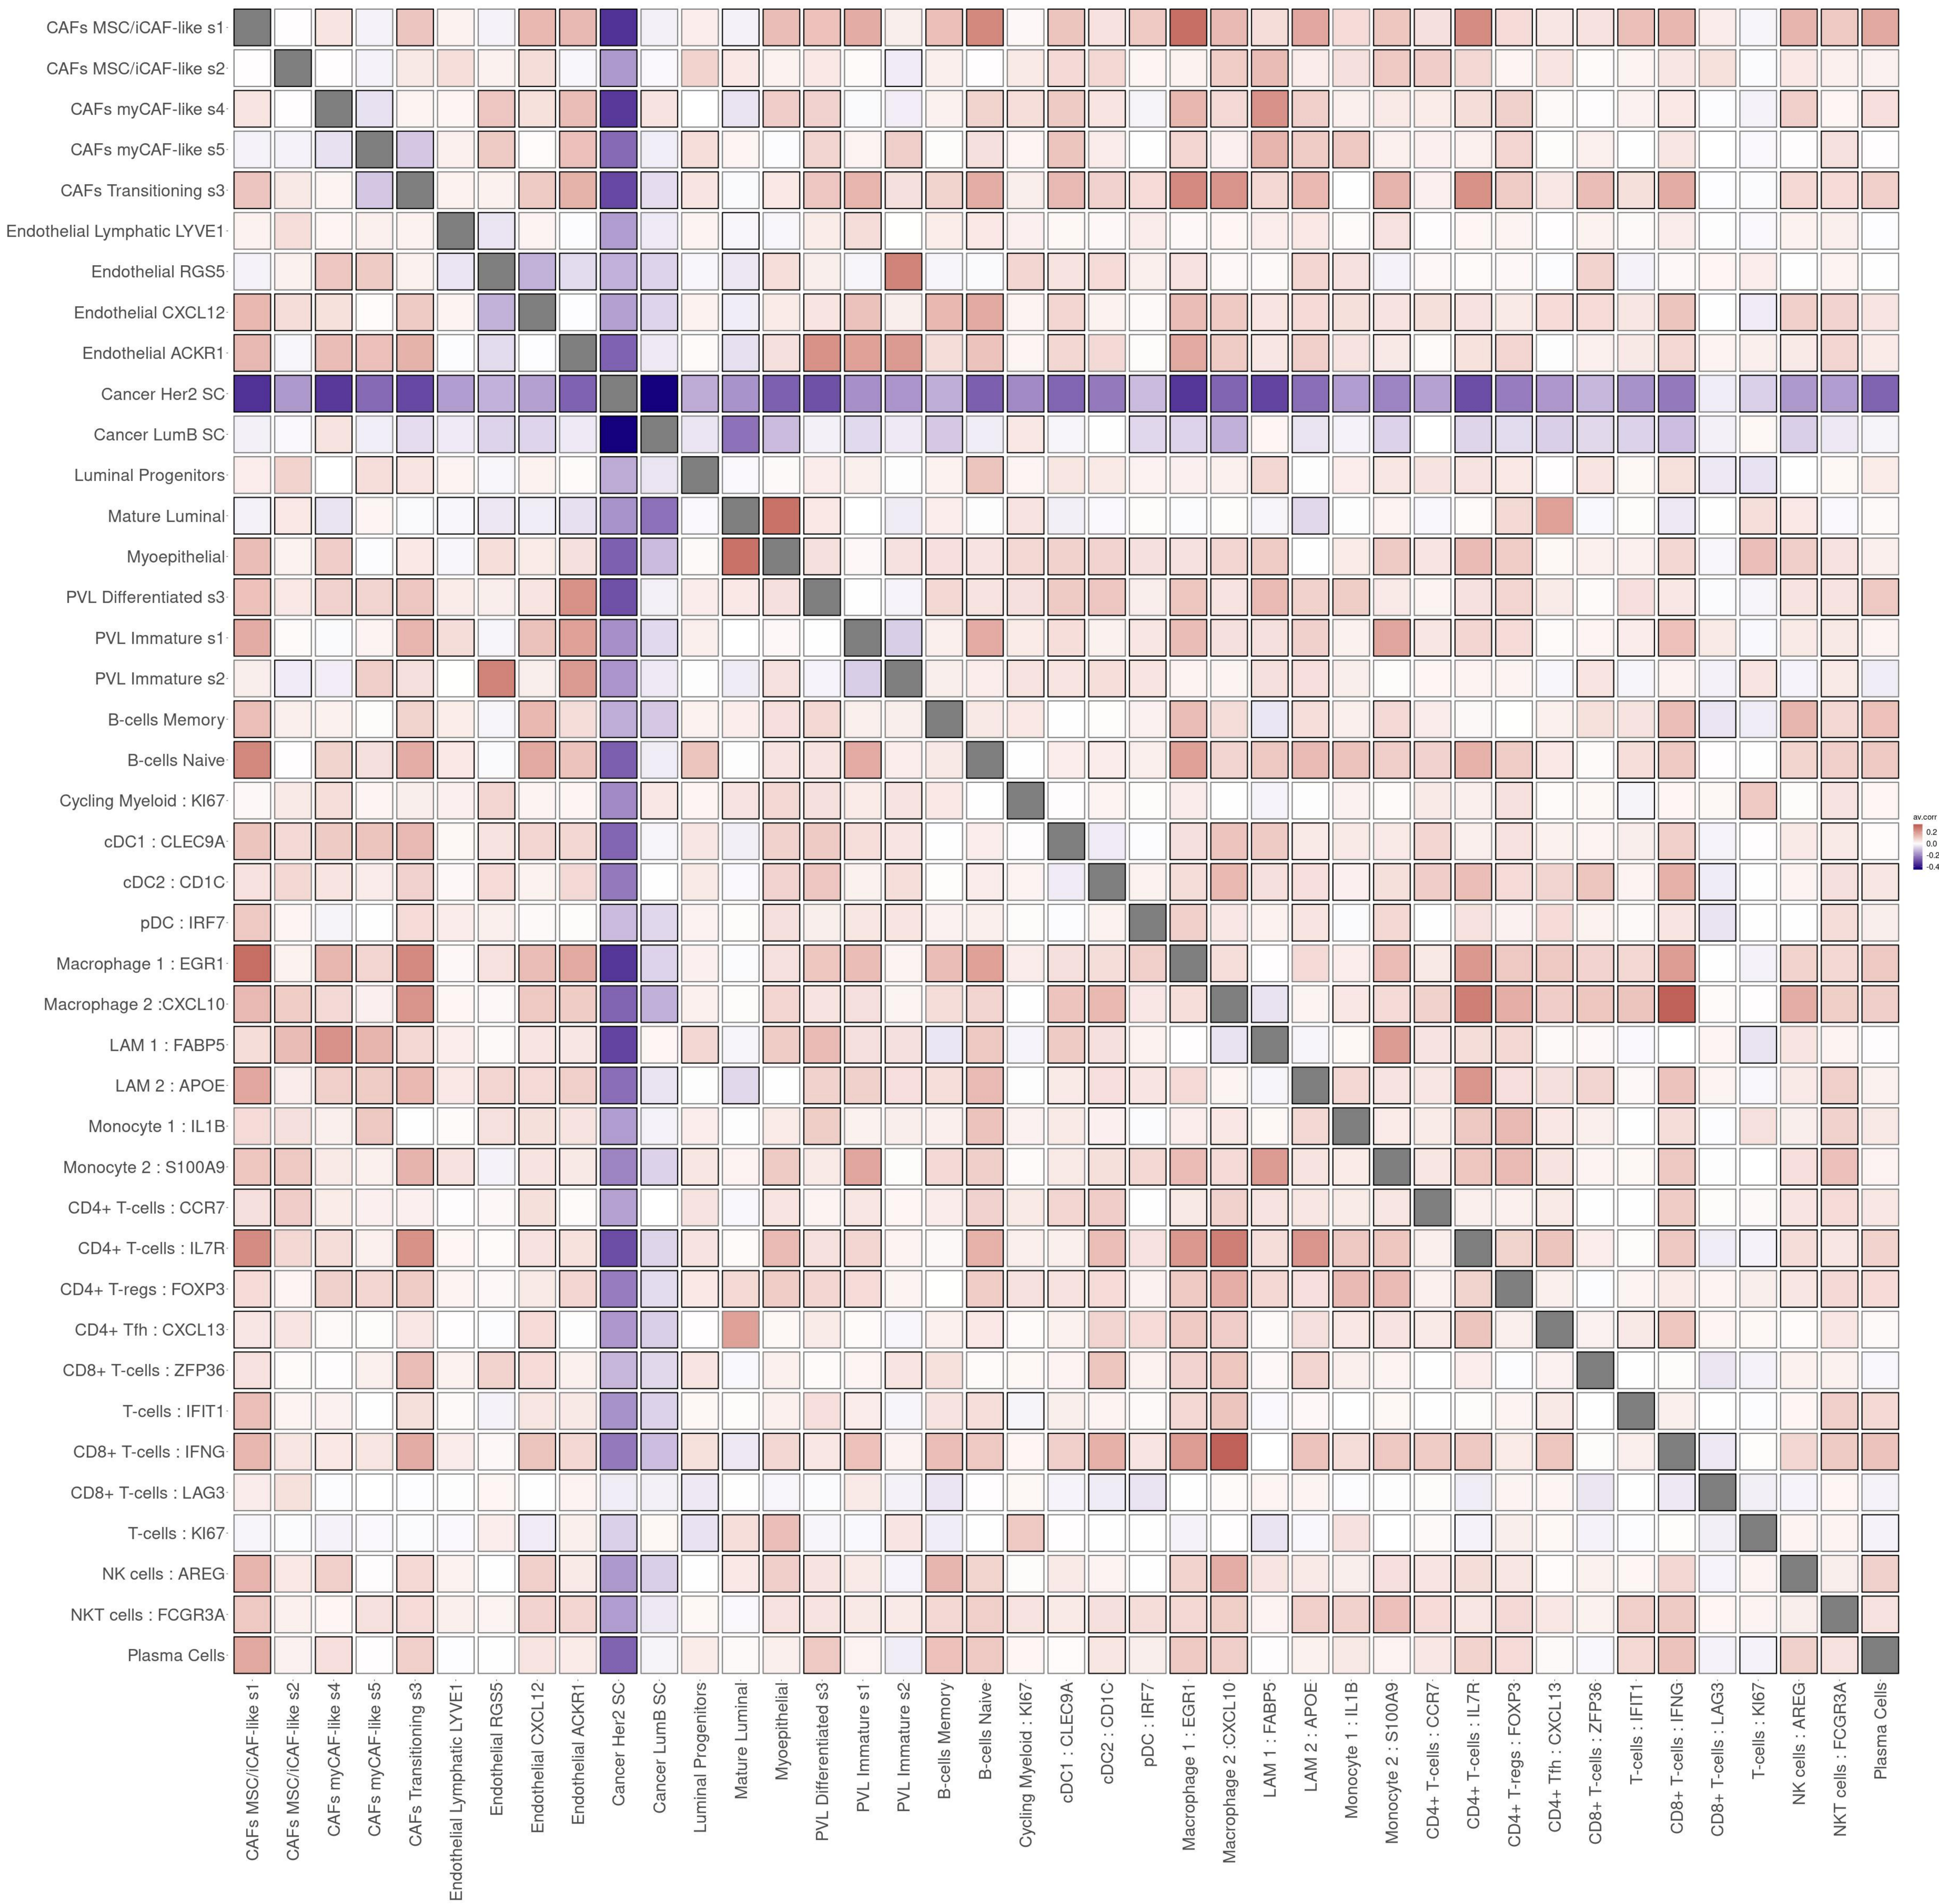

# subset-H

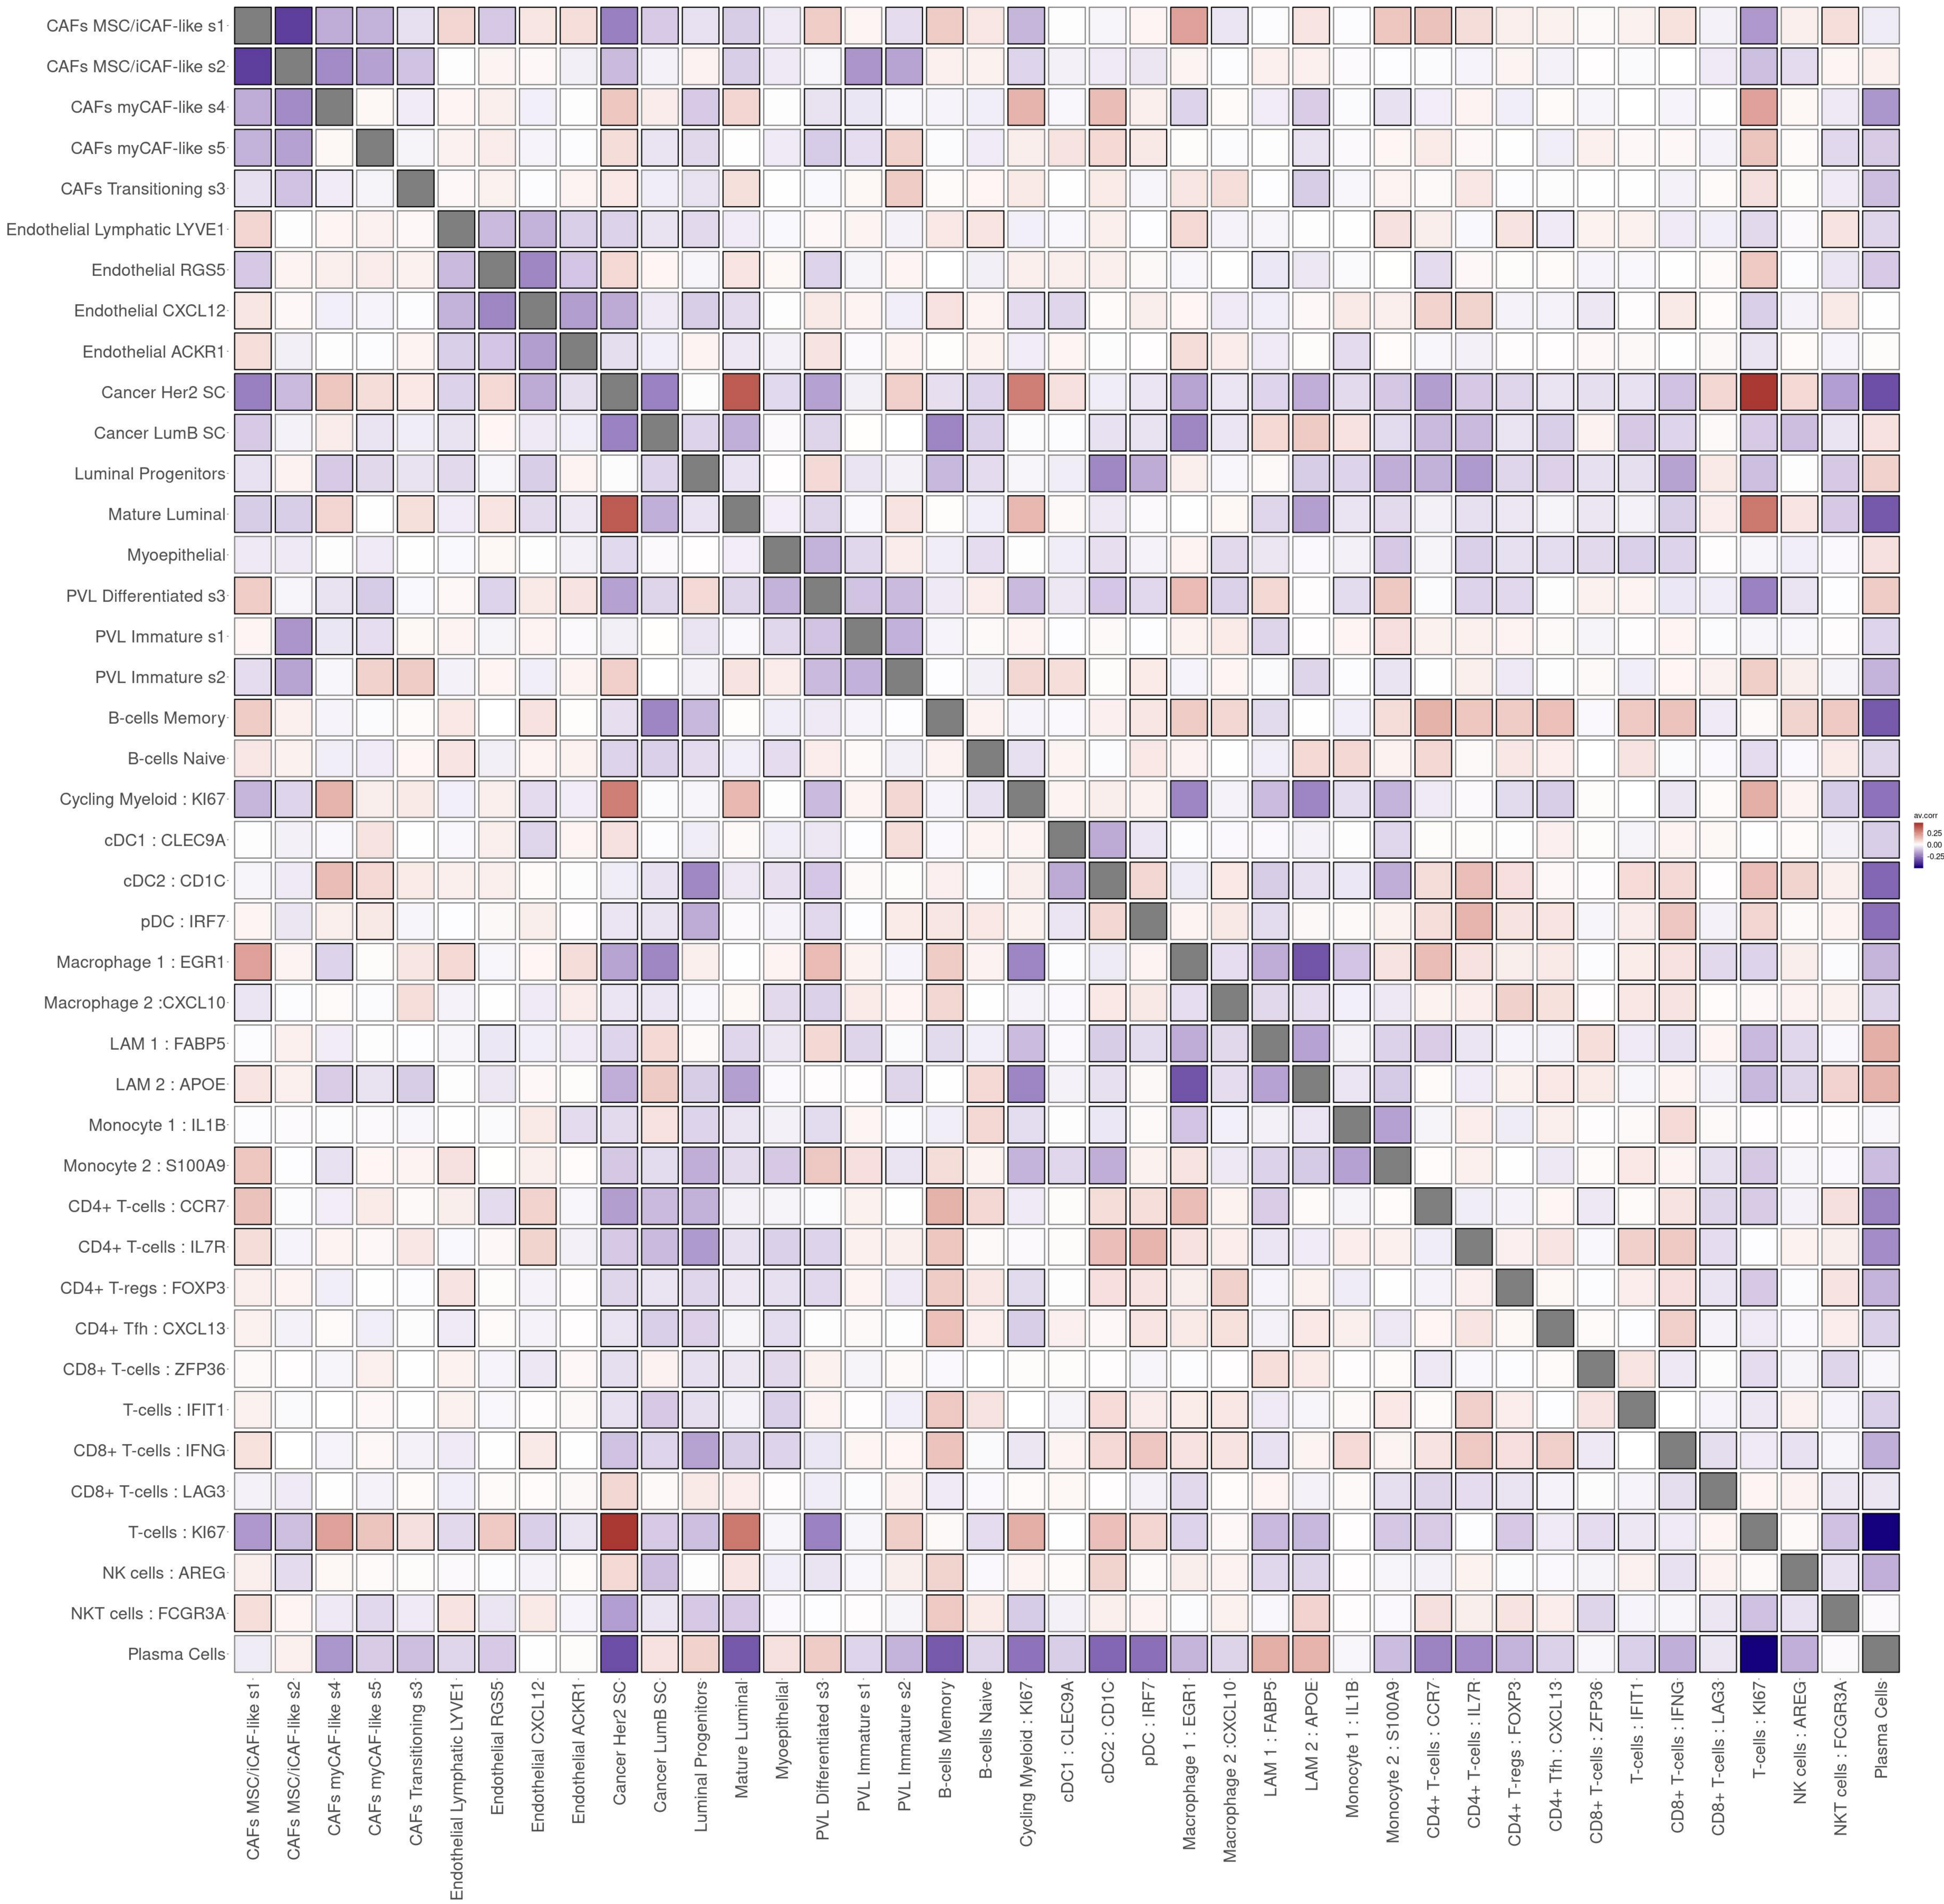

# subset-all-macro

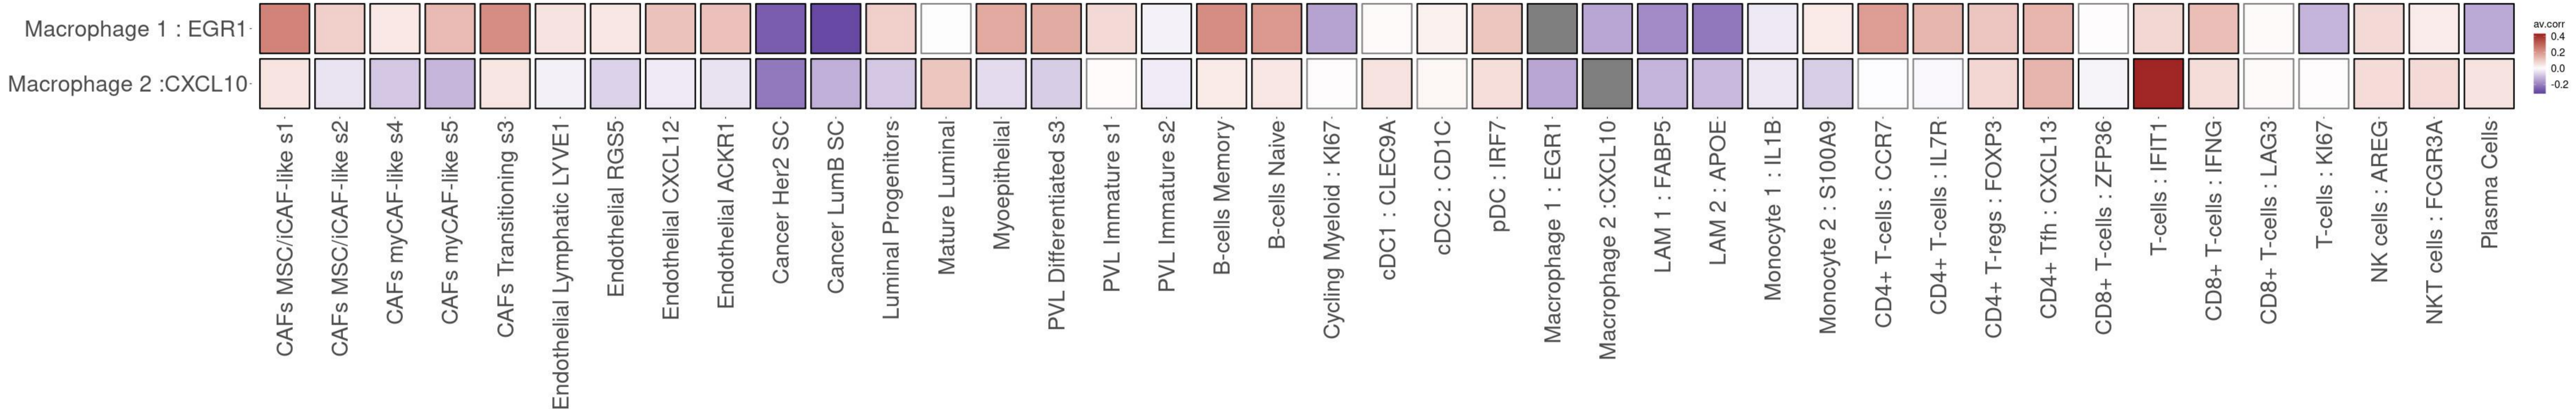

# subset-C

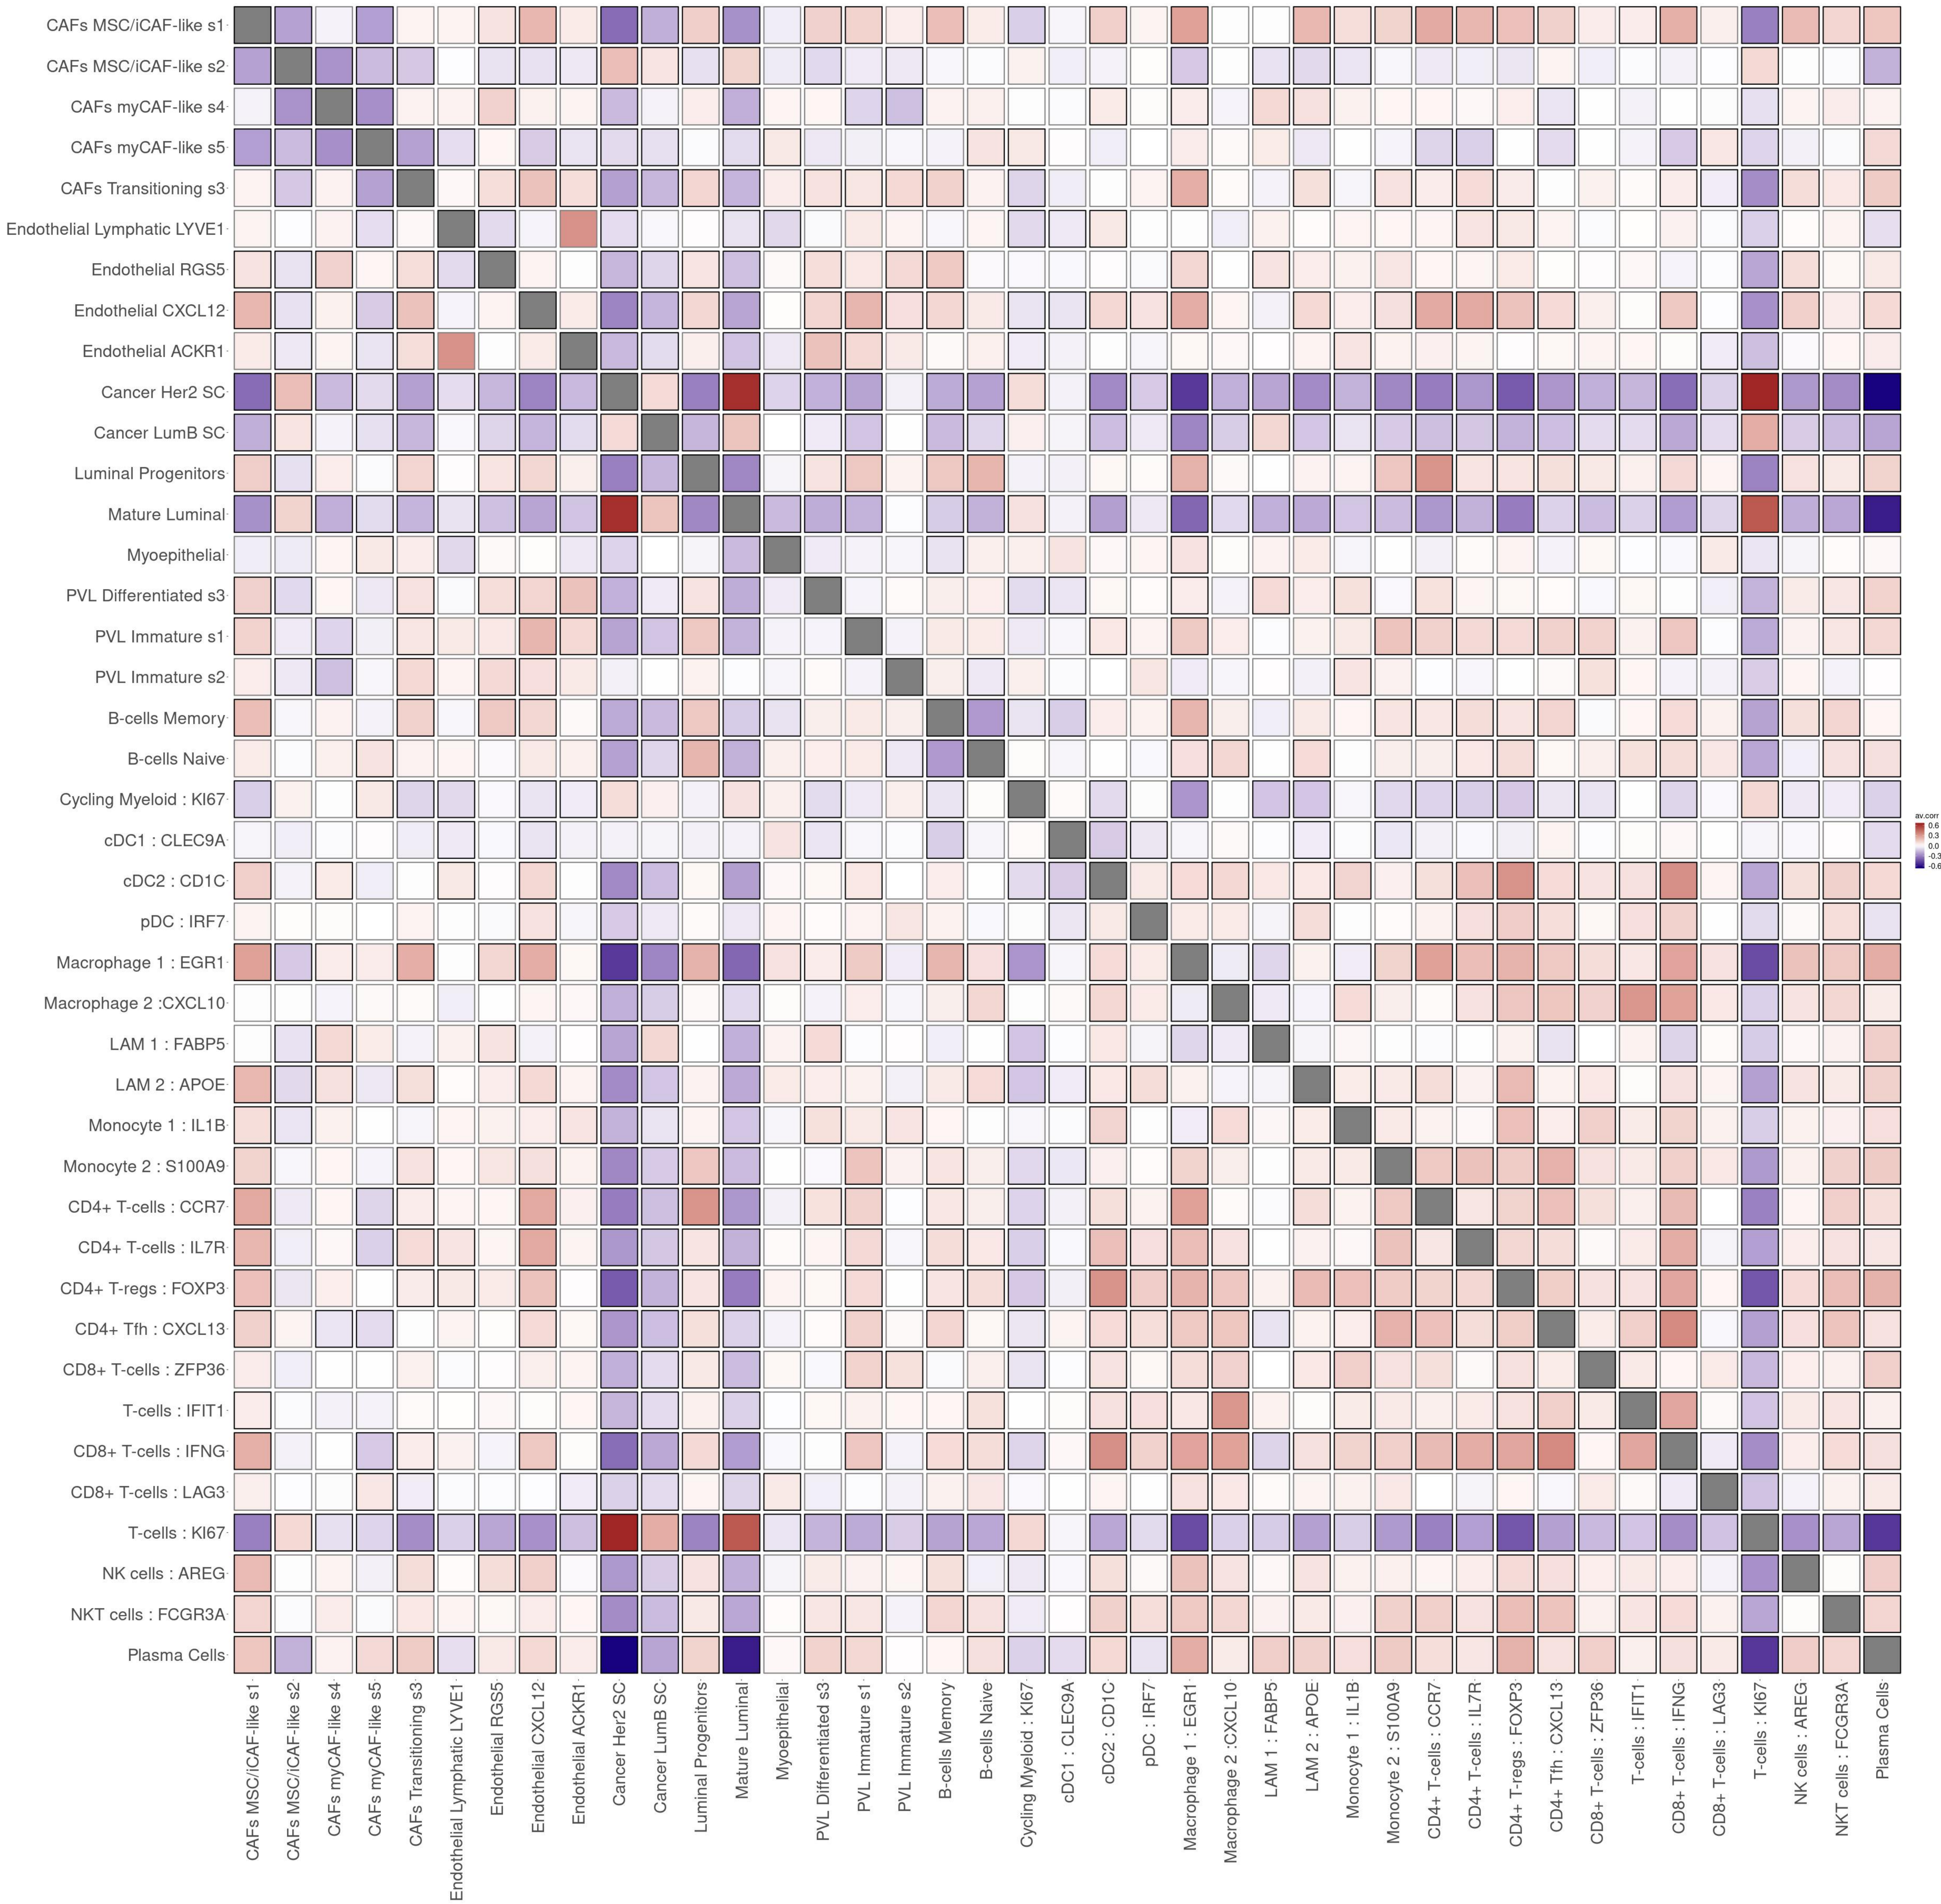





# subset-all-t\_cell

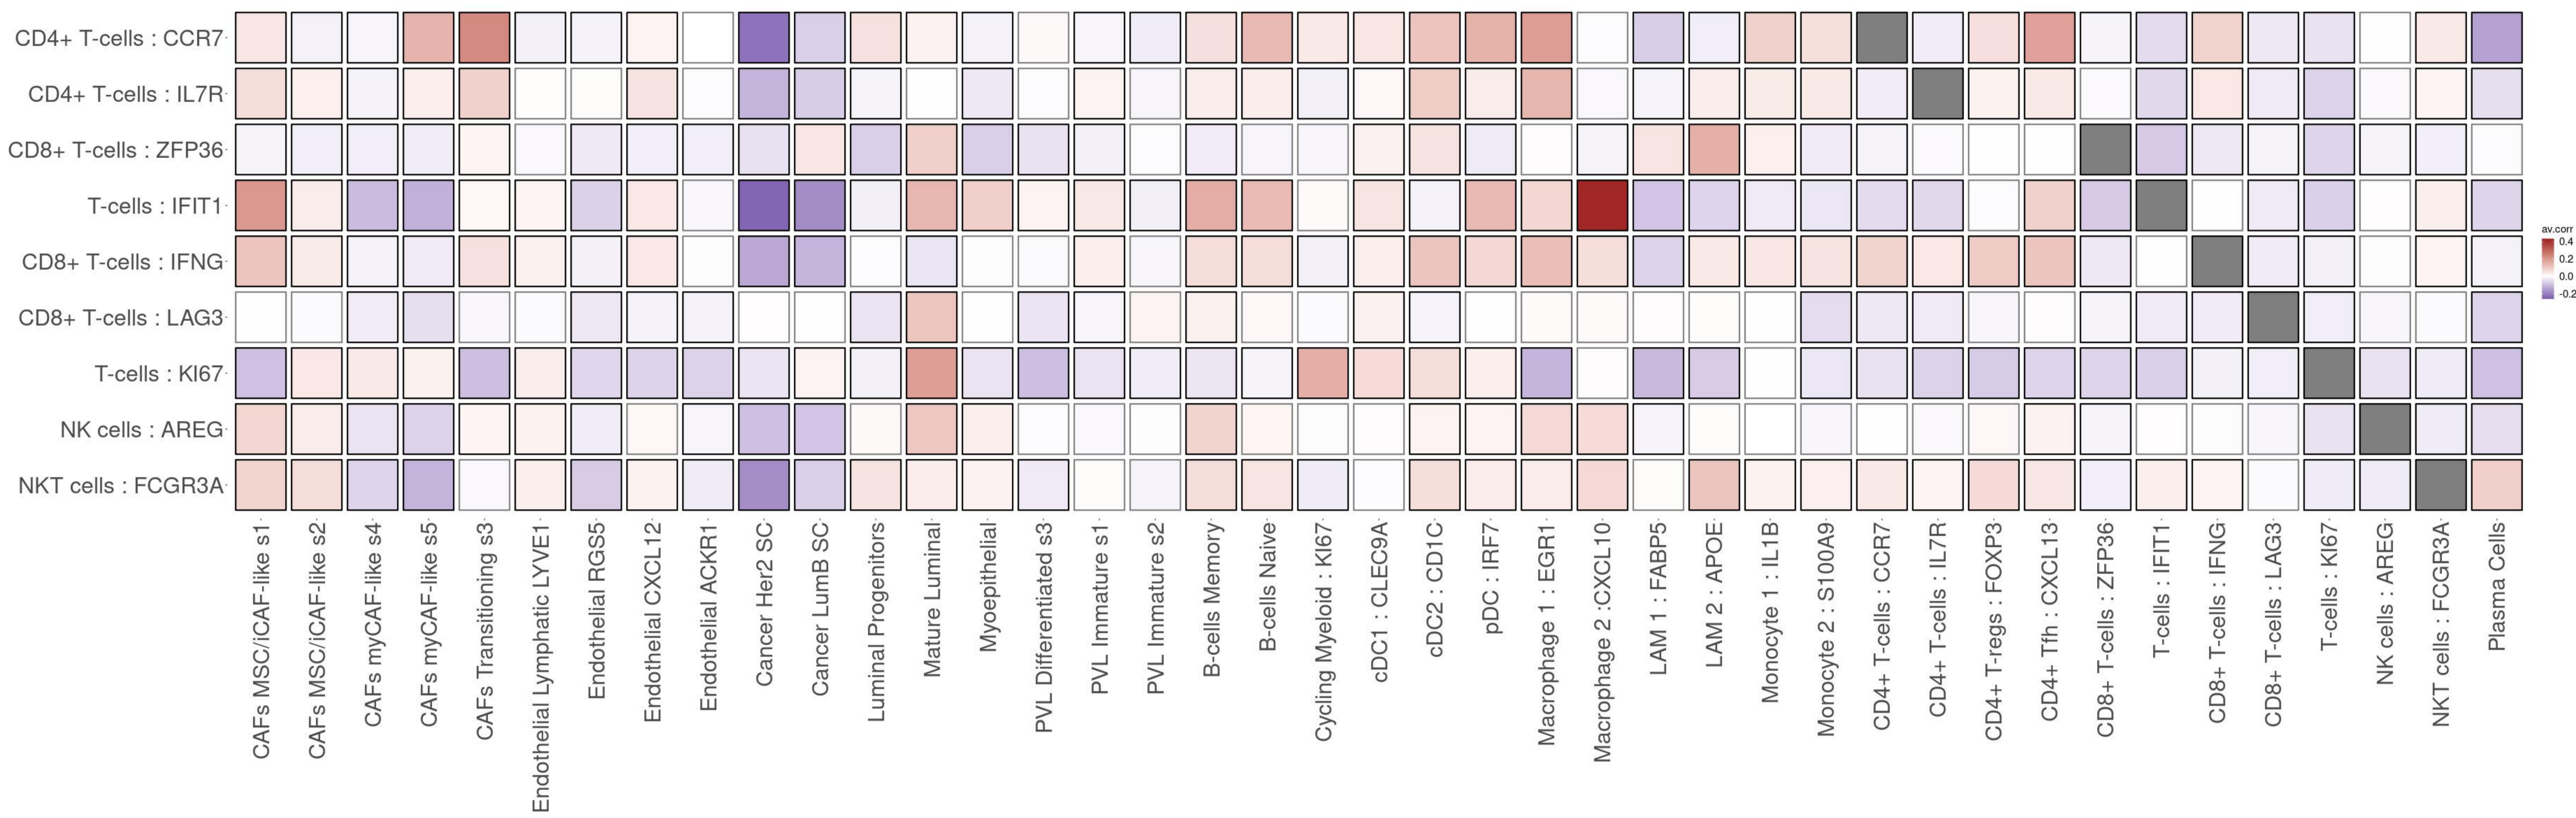

# subset-B

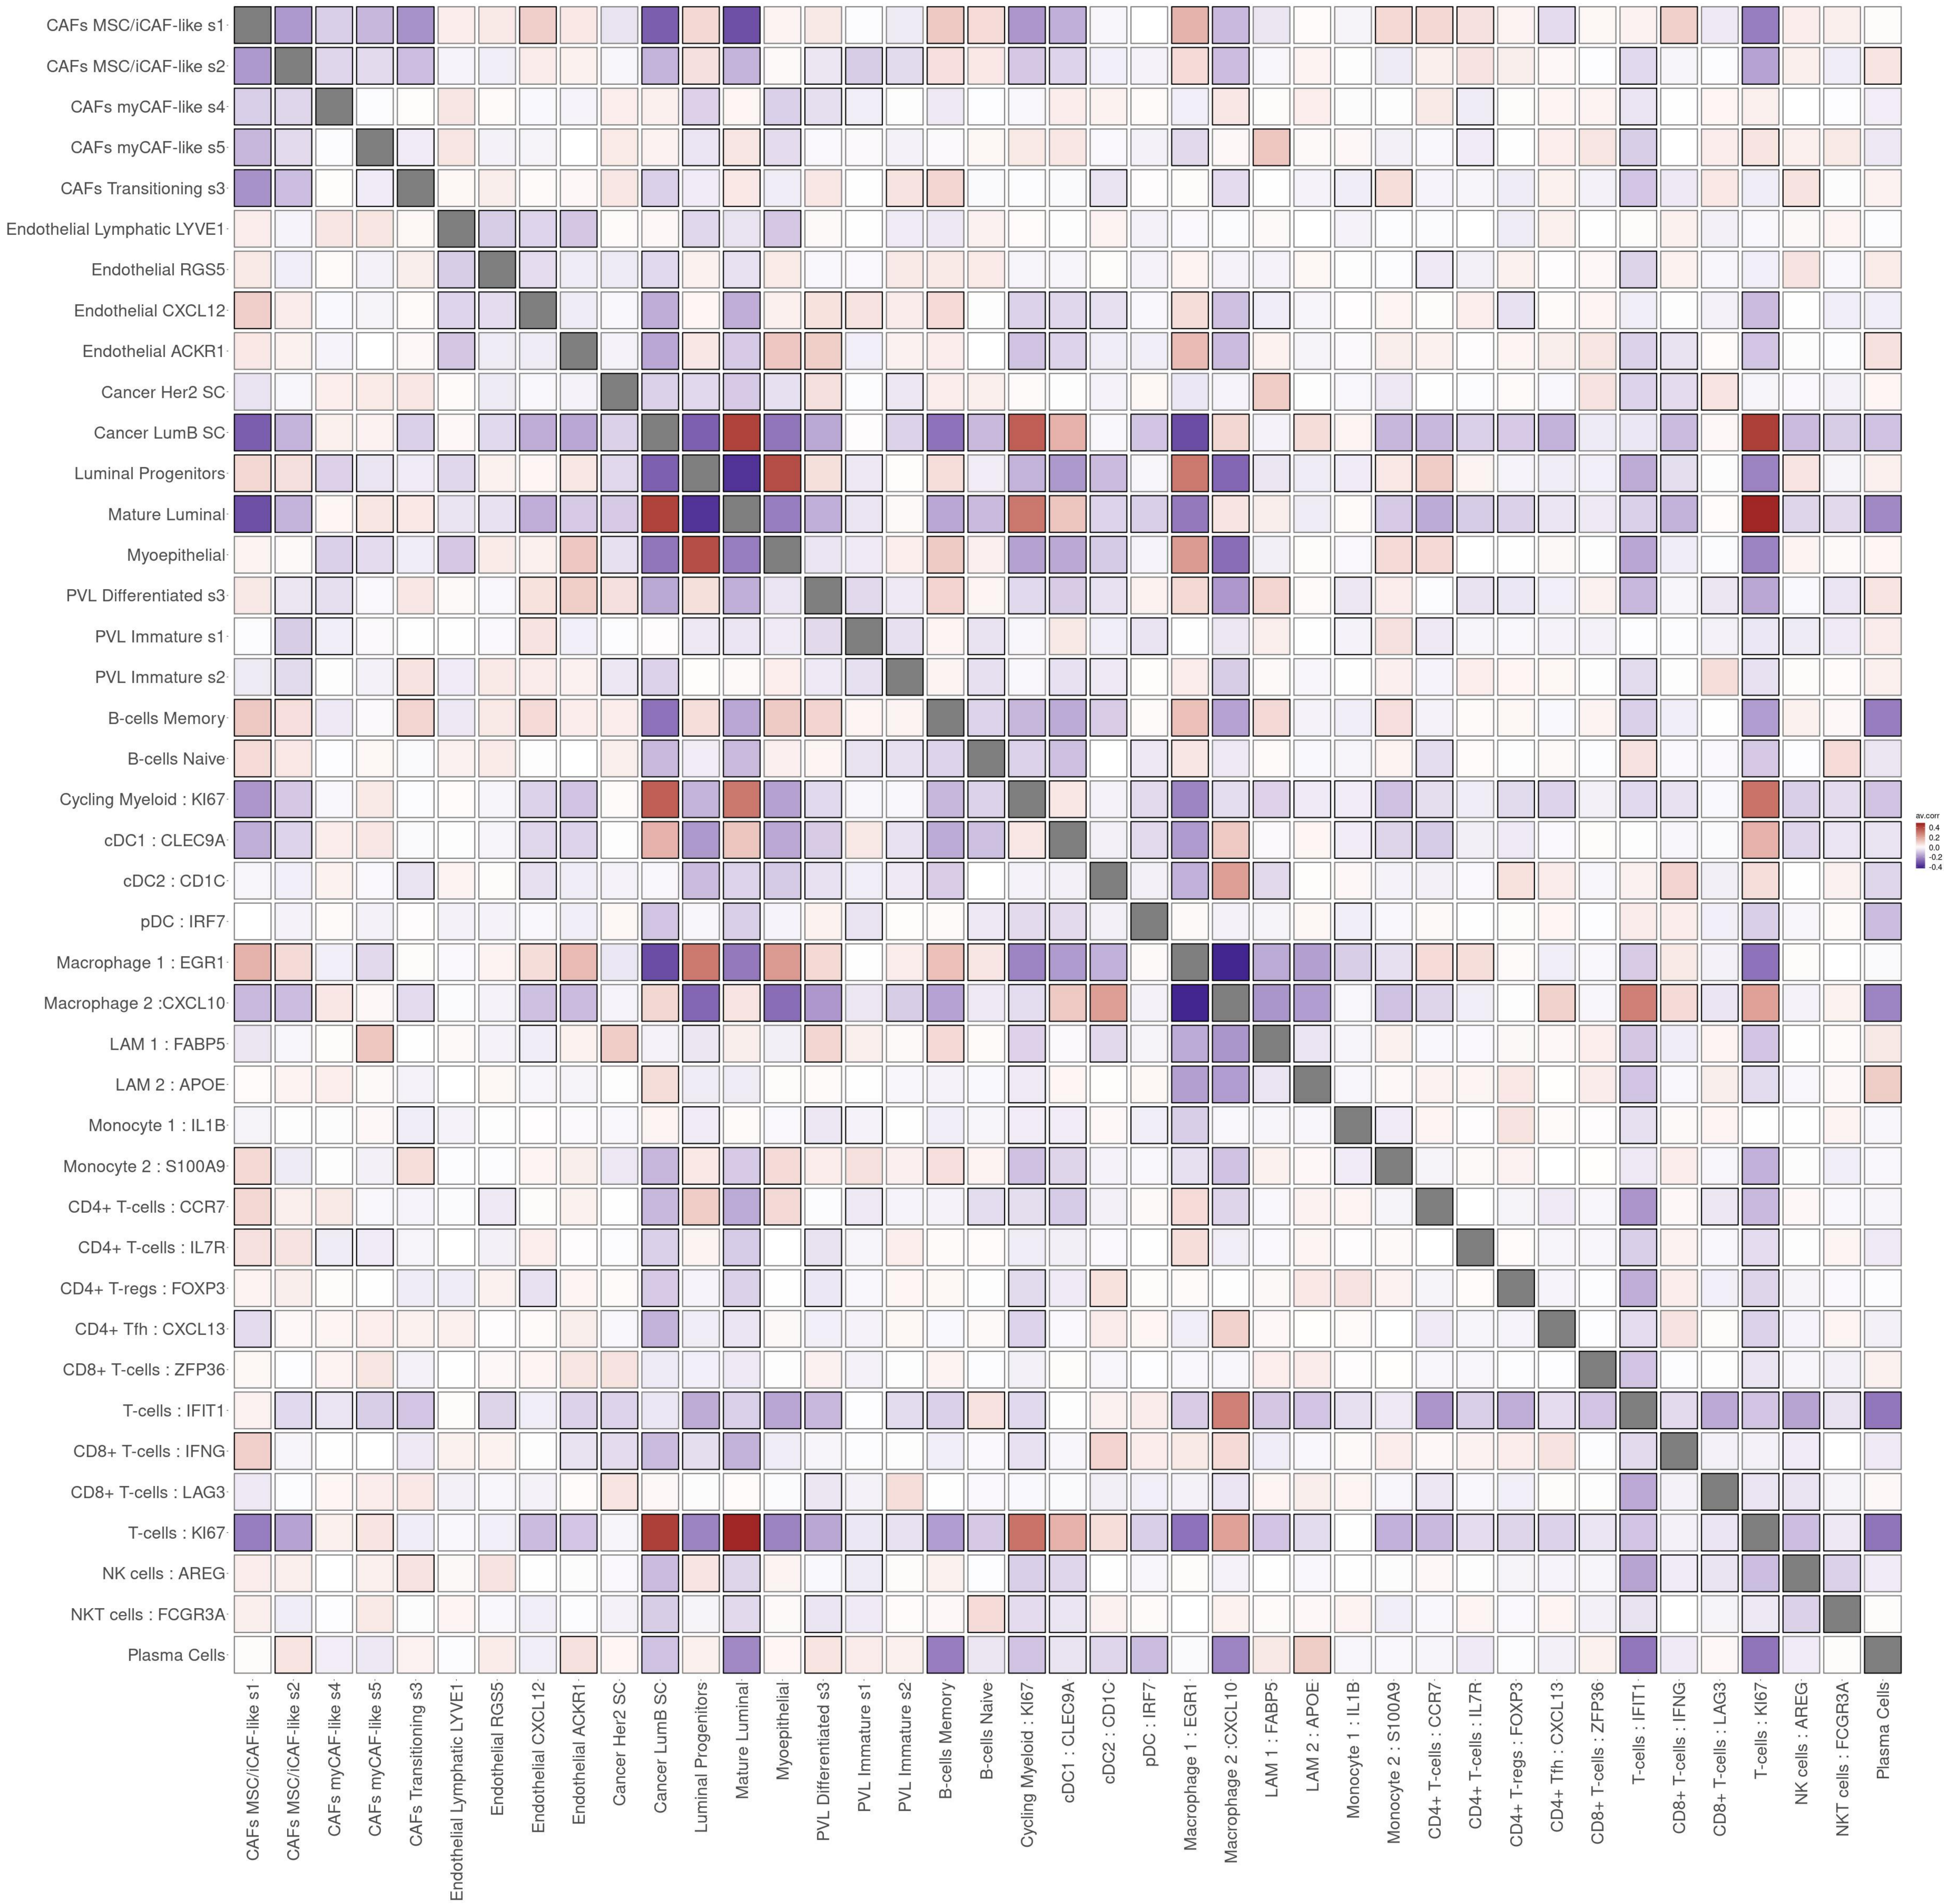

# subset-G

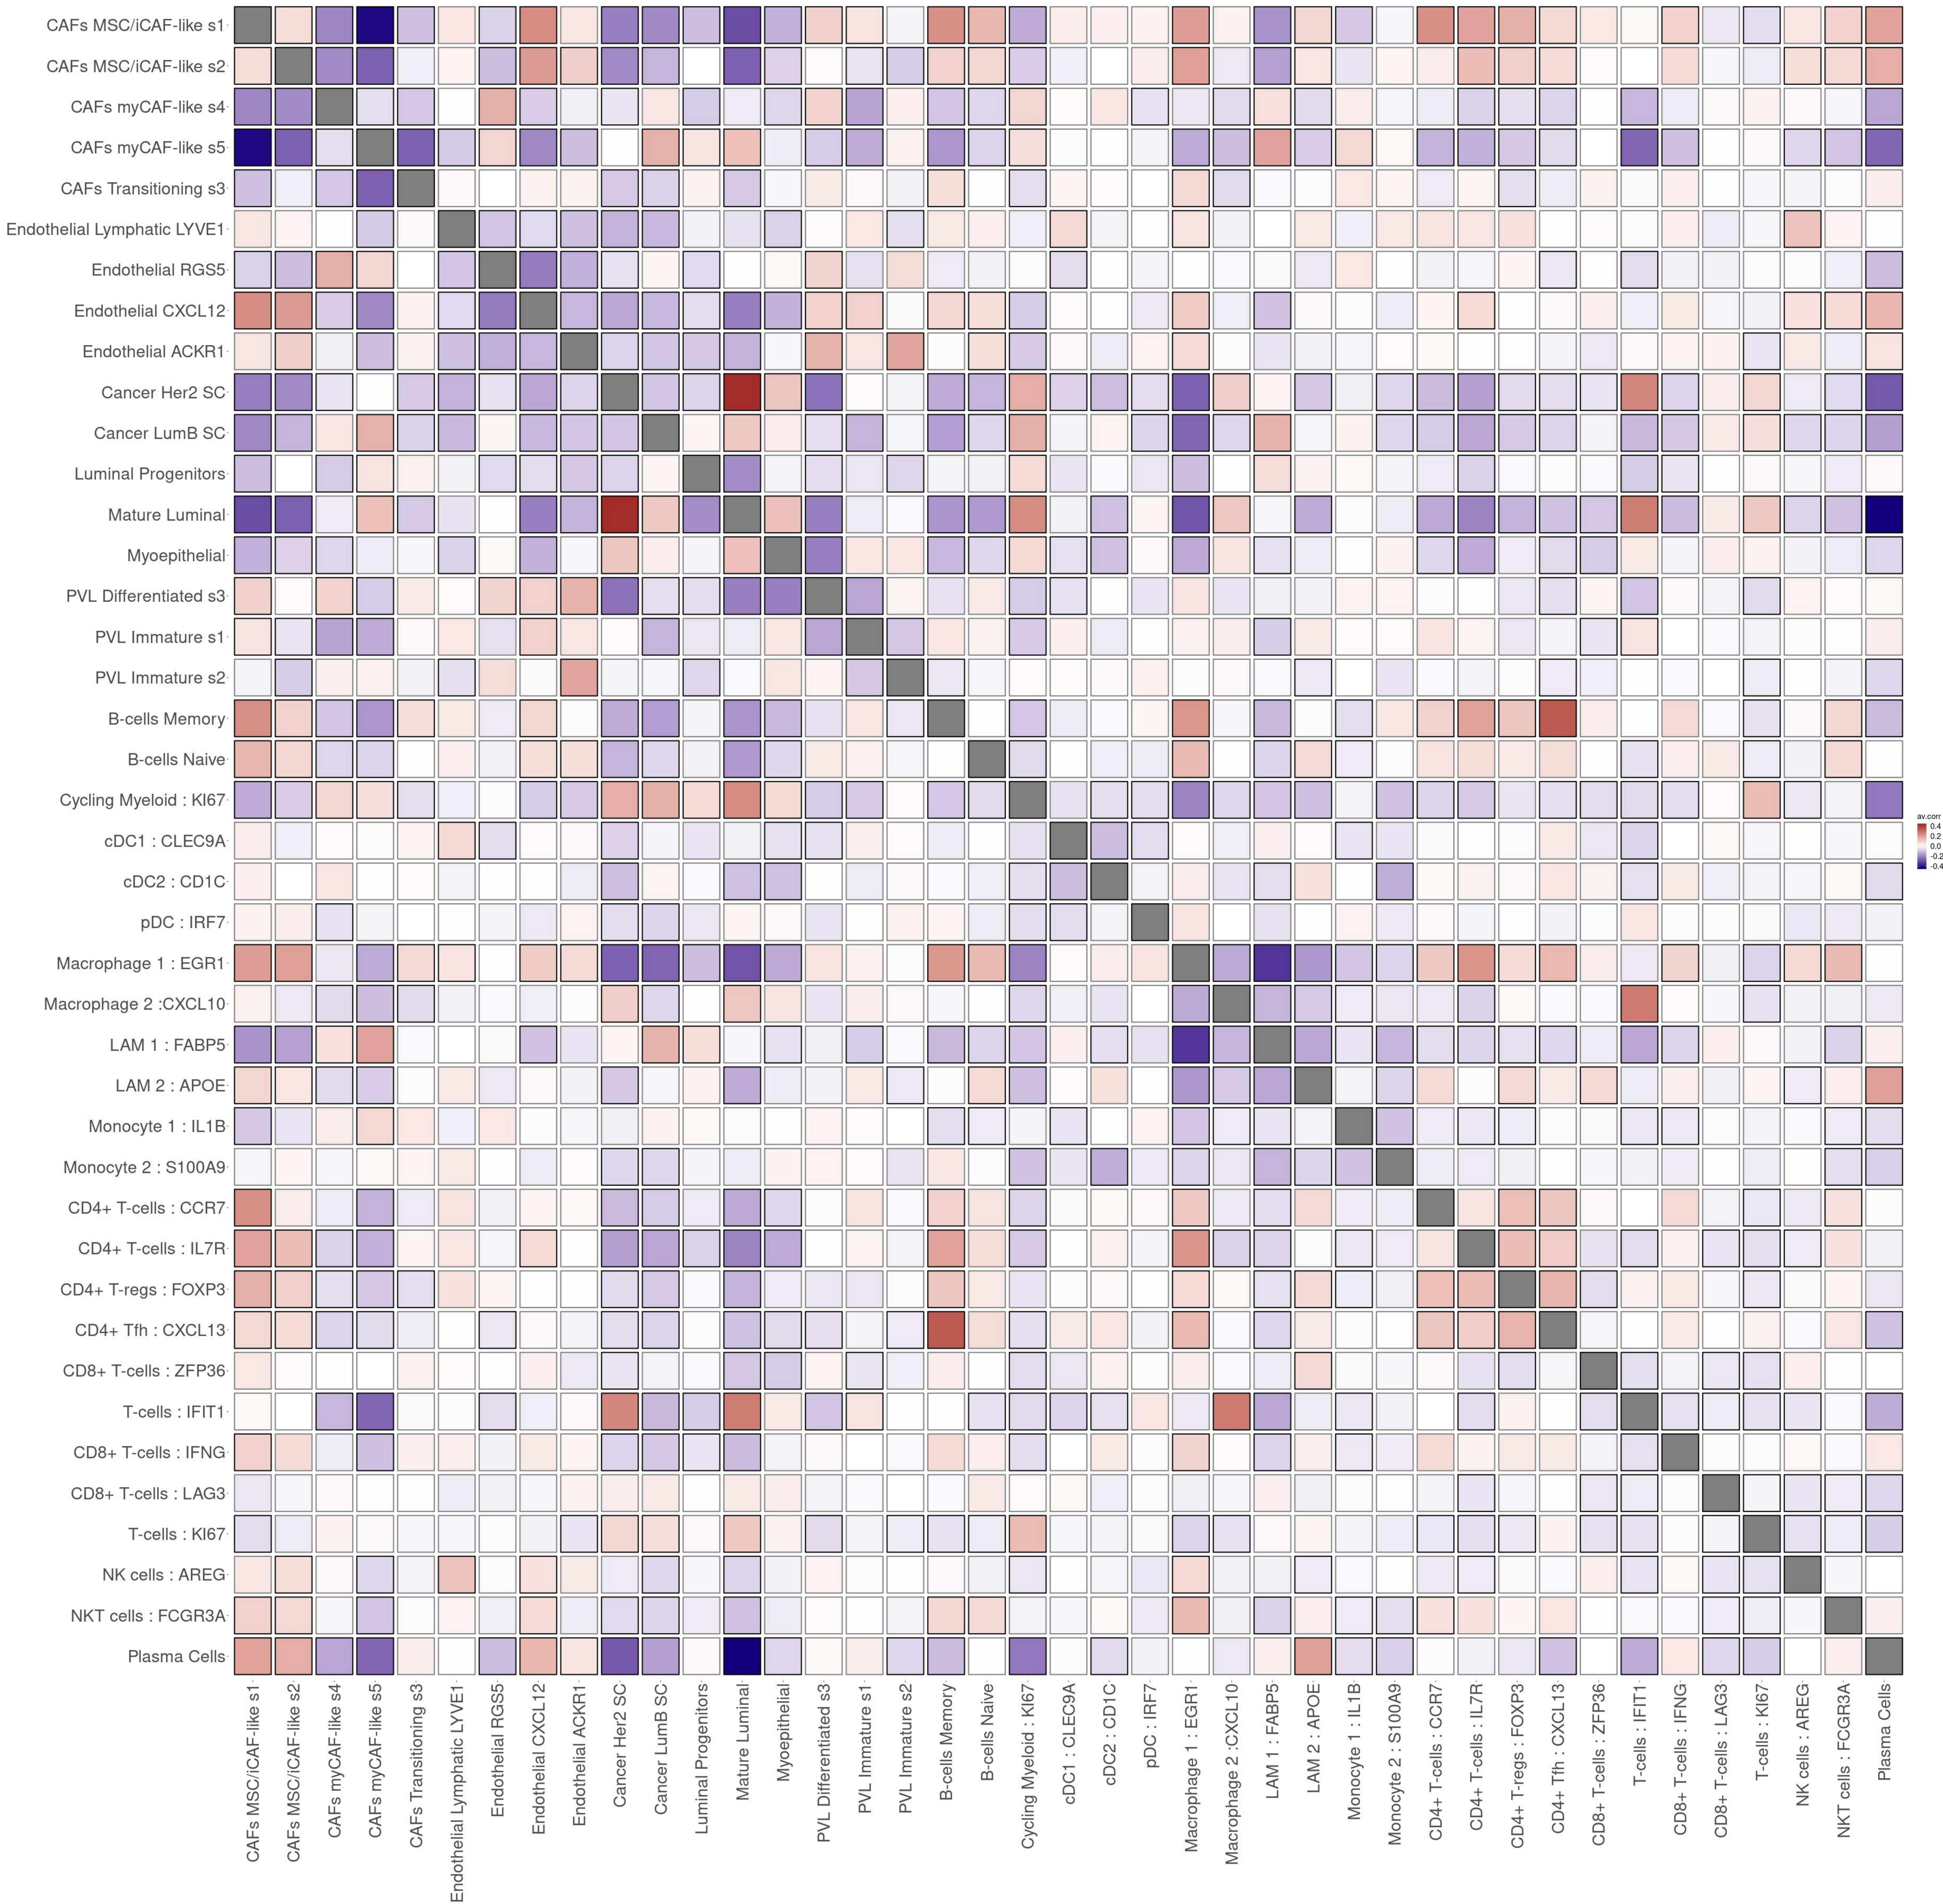





# subset-F

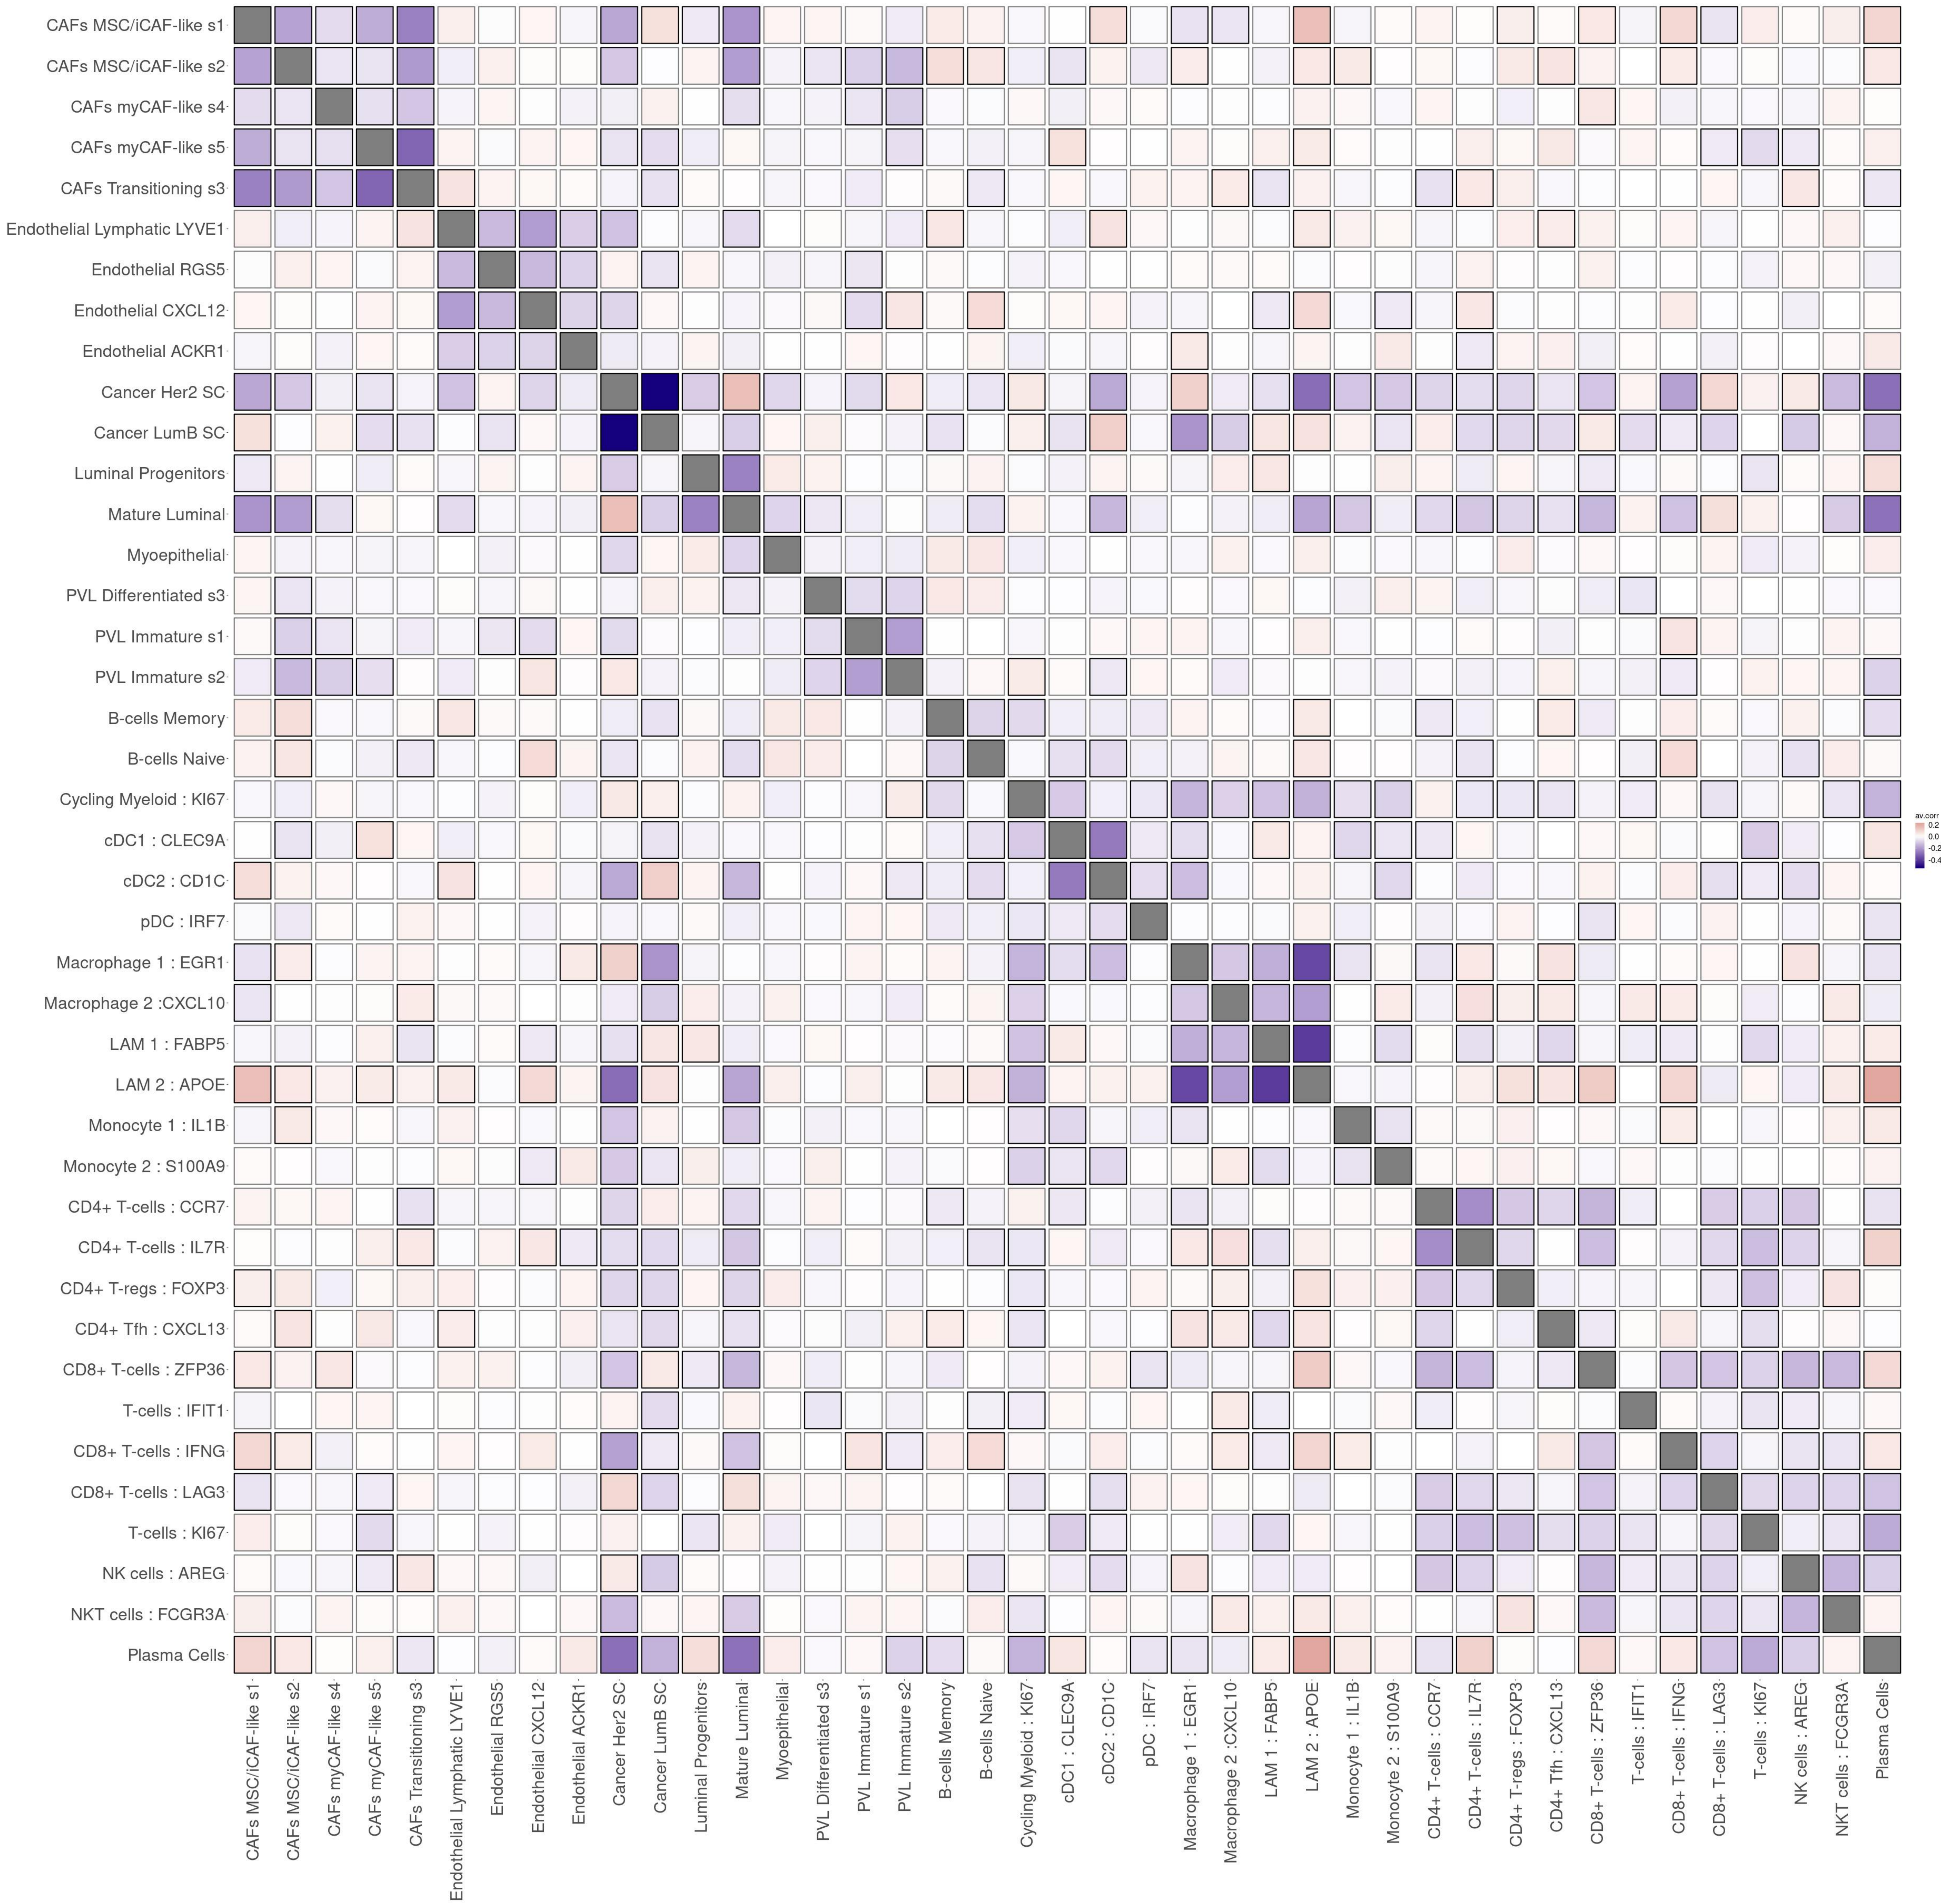

Supplement: 41467_2021_26271_MOESM13_ESM.pdf [file 41467_2021_26271_MOESM13_ESM.pdf]
